# Supplementary material for: A global to local genomics analysis of Clostridioides difficile ST1/RT027 identifies cryptic transmission events in a northern Arizona healthcare network
Source: Microb Genom. 2019 May 20;5(7):e000271. doi: 10.1099/mgen.0.000271 (PMC6700662; doi:10.1099/mgen.0.000271)
Supplement: Supplementary File 2 [file mgen-5-271-s002.xlsx]

## Sheet: Genome_Information
Table S1. External genomes analyzed in this study
Sample	Data Type	Num contigs	Num contigs >500	N50	Longest contig	Total bases in contigs	GC content	# Ns	# gaps	# degen	SequenceType (X=novel or incomplete)
GCA_000085225.1_Clostridioides_difficile_CD196_Complete_Genome_ST1	Genome assembly	1		4110554	4110554	4110554	0.2856	0	0	0	ST1
GCA_000210455.1_Clostridioides_difficile_2007855_Complete_Genome_ST1	Genome assembly	1		4179867	4179867	4179867	0.2867	0	0	0	ST1
GCA_000211235.1_Clostridioides_difficile_BI1_Complete_Genome_ST1	Genome assembly	3	3	4118573	4118573	4464700	0.2836	1	0	0	ST1
GCA_000451065.2_Clostridioides_difficile_P23_Contig_ST1	Genome assembly	47	46	147283	356370	4038496	0.2834	0	0	0	ST1
GCA_000451785.2_Clostridioides_difficile_P31_Contig_ST1	Genome assembly	53	53	141869	463026	4102663	0.2854	0	0	0	ST1
GCA_000451885.2_Clostridioides_difficile_P45_Contig_ST1	Genome assembly	48	46	135903	355970	4097352	0.2854	0	0	0	ST1
GCA_000826625.2_Clostridioides_difficile_G46_Contig_ST1	Genome assembly	1		4189317	4189317	4189317	0.288	0	0	0	ST1
GCA_001484885.1_Clostridioides_difficile_CD26A54_R_Contig_ST1	Genome assembly	4	4	1881735	2012939	4146282	0.2868	0	0	0	ST1
GCA_001484895.1_Clostridioides_difficile_CD26A54_S_Contig_ST1	Genome assembly	6	6	1445886	2012710	4166728	0.2872	0	0	0	ST1
GCA_001971835.1_Clostridioides_difficile_20100211_Contig_ST1	Genome assembly	5	5	2845247	2845247	4189946	0.288	0	0	0	ST1
GCA_001972015.1_Clostridioides_difficile_20110270_Contig_ST1	Genome assembly	4	4	3881918	3881918	4179937	0.2876	0	0	0	ST1
GCA_002301945.1_Clostridioides_difficile_6635-BI-ST1_Contig_ST1	Genome assembly	168	89	147362	424923	4160499	0.2855	3	0	0	ST1
GCA_002302765.1_Clostridioides_difficile_7471-BI-ST1_Contig_ST1	Genome assembly	142	81	114196	314364	4140686	0.2855	0	0	0	ST1
GCA_002303165.1_Clostridioides_difficile_7501-BI-ST1_Contig_ST1	Genome assembly	148	115	73545	177261	4129048	0.2853	0	0	0	ST1
GCA_002335485.1_Clostridioides_difficile_NCKUH-21_Contig_ST1	Genome assembly	94	48	219875	763889	4217149	0.2835	0	0	0	ST1
GCA_900007545.1_Clostridioides_difficile_VL_0002_Contig_ST1	Genome assembly	366	121	79896	184781	4121214	0.2855	0	0	0	ST1
GCA_900007575.1_Clostridioides_difficile_VL_0012_Contig_ST1	Genome assembly	640	99	125522	407698	4180220	0.2872	0	0	0	ST1
GCA_900007625.1_Clostridioides_difficile_VL_0204_Contig_ST1	Genome assembly	406	159	56070	318673	4123693	0.2856	0	0	0	ST1
GCA_900008285.1_Clostridioides_difficile_VL_0017_Contig_ST1	Genome assembly	897	117	112889	407366	4201138	0.2885	0	0	0	ST1
GCA_900008375.1_Clostridioides_difficile_VL_0074_Contig_ST1	Genome assembly	782	139	88382	265050	4207452	0.2885	0	0	0	ST1
GCA_900008395.1_Clostridioides_difficile_VL_0094_Contig_ST1	Genome assembly	299	112	67547	237340	4119551	0.2852	0	0	0	ST1
GCA_900008425.1_Clostridioides_difficile_VL_0109_Contig_ST1	Genome assembly	1363	158	60703	236273	4253009	0.2904	0	0	0	ST1
GCA_900008445.1_Clostridioides_difficile_VL_0128_Contig_ST1	Genome assembly	808	326	23648	118524	4149081	0.2869	0	0	0	ST1
GCA_900008515.1_Clostridioides_difficile_VL_0301_Contig_ST1	Genome assembly	1061	149	89557	276753	4185105	0.2876	0	0	0	ST1
GCA_900008655.1_Clostridioides_difficile_VL_0435_Contig_ST1	Genome assembly	834	300	28464	116316	4151058	0.2876	0	0	0	ST1
GCA_900008755.1_Clostridioides_difficile_VL_0321_Contig_ST1	Genome assembly	1230	170	60422	312557	4211728	0.2886	0	0	0	ST1
GCA_900008765.1_Clostridioides_difficile_VL_0319_Contig_ST1	Genome assembly	296	99	96137	254665	4122132	0.2851	0	0	0	ST1
GCA_900008795.1_Clostridioides_difficile_VL_0398_Contig_ST1	Genome assembly	659	235	38032	131514	4158688	0.2873	0	0	0	ST1
GCA_900009255.1_Clostridioides_difficile_VL_0448_Contig_ST1	Genome assembly	612	273	28452	101744	4121373	0.2862	0	0	0	ST1
GCA_900009445.1_Clostridioides_difficile_VL_0349_Contig_ST1	Genome assembly	1317	213	47301	182236	4232008	0.2897	0	0	0	ST1
GCA_900009465.1_Clostridioides_difficile_VL_0388_Contig_ST1	Genome assembly	888	192	48045	177694	4188802	0.2883	0	0	0	ST1
GCA_900009475.1_Clostridioides_difficile_VL_0438_Contig_ST1	Genome assembly	744	116	114936	289434	4189935	0.2876	0	0	0	ST1
GCA_900009715.1_Clostridioides_difficile_VL_0132_Contig_ST1	Genome assembly	978	219	41822	141341	4213518	0.2895	0	0	0	ST1
GCA_900010335.1_Clostridioides_difficile_VL_0127_Contig_ST1	Genome assembly	1260	244	44948	240890	4325558	0.287	0	0	0	ST1
GCA_900010355.1_Clostridioides_difficile_VL_0146_Contig_ST1	Genome assembly	770	184	46389	176930	4186764	0.2879	0	0	0	ST1
GCA_900010385.1_Clostridioides_difficile_VL_0412_Contig_ST1	Genome assembly	408	165	50418	148548	4097646	0.2857	0	0	0	ST1
GCA_900010425.1_Clostridioides_difficile_VL_0468_Contig_ST1	Genome assembly	431	107	101187	241499	4120627	0.2856	0	0	0	ST1
GCA_900010505.1_Clostridioides_difficile_VL_0390_Contig_ST1	Genome assembly	829	121	112937	276753	4196333	0.2879	0	0	0	ST1
GCA_900010875.1_Clostridioides_difficile_VL_0022_Contig_ST1	Genome assembly	1070	193	55473	167013	4224083	0.2885	0	0	0	ST1
GCA_900010885.1_Clostridioides_difficile_VL_0011_Contig_ST1	Genome assembly	675	330	22169	94989	4122864	0.2866	0	0	0	ST1
GCA_900011105.1_Clostridioides_difficile_VL_0177_Contig_ST1	Genome assembly	306	88	95020	323115	4124242	0.2851	0	0	0	ST1
GCA_900011165.1_Clostridioides_difficile_VL_0420_Contig_ST1	Genome assembly	997	162	55712	193652	4207547	0.2894	0	0	0	ST1
GCA_900011385.1_Clostridioides_difficile_VL_0050_Contig_ST1	Genome assembly	1264	195	51532	197245	4205864	0.2878	0	0	0	ST1
GCA_900011675.1_Clostridioides_difficile_VL_0193_Contig_ST1	Genome assembly	1146	173	55570	300851	4221227	0.289	0	0	0	ST1
GCA_900011905.1_Clostridioides_difficile_VL_0081_Contig_ST1	Genome assembly	601	290	27966	98002	4132156	0.2864	0	0	0	ST1
GCA_900011915.1_Clostridioides_difficile_VL_0082_Contig_ST1	Genome assembly	784	98	108005	407584	4169049	0.2868	0	0	0	ST1
GCA_900011955.1_Clostridioides_difficile_VL_0090_Contig_ST1	Genome assembly	778	119	102349	276753	4193844	0.2878	0	0	0	ST1
GCA_900011965.1_Clostridioides_difficile_VL_0092_Contig_ST1	Genome assembly	321	114	90393	257677	4157070	0.285	0	0	0	ST1
GCA_900012035.1_Clostridioides_difficile_VL_0108_Contig_ST1	Genome assembly	322	85	106650	244970	4117060	0.2839	0	0	0	ST1
GCA_900012055.1_Clostridioides_difficile_VL_0114_Contig_ST1	Genome assembly	339	145	59007	237358	4114836	0.2853	0	0	0	ST1
GCA_900012105.1_Clostridioides_difficile_VL_0119_Contig_ST1	Genome assembly	340	132	83417	237268	4124686	0.2853	0	0	0	ST1
GCA_900012115.1_Clostridioides_difficile_VL_0120_Contig_ST1	Genome assembly	556	270	30107	133467	4114762	0.2861	0	0	0	ST1
GCA_900012165.1_Clostridioides_difficile_VL_0142_Contig_ST1	Genome assembly	639	229	39821	138736	4130485	0.2864	0	0	0	ST1
GCA_900012305.1_Clostridioides_difficile_VL_0174_Contig_ST1	Genome assembly	266	80	134544	407311	4156515	0.2859	0	0	0	ST1
GCA_900012455.1_Clostridioides_difficile_VL_0066_Contig_ST1	Genome assembly	1258	210	45165	173308	4241005	0.2897	0	0	0	ST1
GCA_900012465.1_Clostridioides_difficile_VL_0162_Contig_ST1	Genome assembly	924	163	55514	275577	4172437	0.287	0	0	0	ST1
GCA_900012475.1_Clostridioides_difficile_VL_0222_Contig_ST1	Genome assembly	1343	222	37479	144728	4223183	0.2881	0	0	0	ST1
GCA_900012835.1_Clostridioides_difficile_VL_0196_Contig_ST1	Genome assembly	1260	250	38278	100374	4231839	0.2891	0	0	0	ST1
GCA_900012865.1_Clostridioides_difficile_VL_0199_Contig_ST1	Genome assembly	266	81	108096	240801	4120144	0.2851	0	0	0	ST1
GCA_900012885.1_Clostridioides_difficile_VL_0201_Contig_ST1	Genome assembly	1197	201	51264	218238	4216827	0.2889	0	0	0	ST1
GCA_900012945.1_Clostridioides_difficile_VL_0211_Contig_ST1	Genome assembly	1250	161	70186	240728	4235713	0.2892	0	0	0	ST1
GCA_900013005.1_Clostridioides_difficile_VL_0217_Contig_ST1	Genome assembly	1420	246	36825	159900	4245652	0.2897	0	0	0	ST1
GCA_900013095.1_Clostridioides_difficile_VL_0229_Contig_ST1	Genome assembly	413	102	107902	276753	4144614	0.2861	0	0	0	ST1
GCA_900013255.1_Clostridioides_difficile_VL_0396_Contig_ST1	Genome assembly	1067	304	27871	129831	4168649	0.289	0	0	0	ST1
GCA_900013345.1_Clostridioides_difficile_VL_0151_Contig_ST1	Genome assembly	1306	209	43420	230875	4228414	0.2884	0	0	0	ST1
GCA_900013395.1_Clostridioides_difficile_VL_0457_Contig_ST1	Genome assembly	486	251	33425	111761	4145067	0.2844	0	0	0	ST1
GCA_900013645.1_Clostridioides_difficile_VL_0244_Contig_ST1	Genome assembly	756	312	25968	96487	4127074	0.2869	0	0	0	ST1
GCA_900013655.1_Clostridioides_difficile_VL_0245_Contig_ST1	Genome assembly	315	114	90332	244948	4176184	0.2863	0	0	0	ST1
GCA_900013665.1_Clostridioides_difficile_VL_0246_Contig_ST1	Genome assembly	1213	230	37973	121794	4208396	0.2889	0	0	0	ST1
GCA_900013685.1_Clostridioides_difficile_VL_0248_Contig_ST1	Genome assembly	1461	205	53448	216235	4264469	0.2896	0	0	0	ST1
GCA_900013735.1_Clostridioides_difficile_VL_0260_Contig_ST1	Genome assembly	953	189	46644	146820	4187833	0.2872	0	0	0	ST1
GCA_900013805.1_Clostridioides_difficile_VL_0274_Contig_ST1	Genome assembly	813	122	110767	356936	4180700	0.2871	0	0	0	ST1
GCA_900013815.1_Clostridioides_difficile_VL_0277_Contig_ST1	Genome assembly	444	84	125375	357506	4152301	0.286	0	0	0	ST1
GCA_900013845.1_Clostridioides_difficile_VL_0286_Contig_ST1	Genome assembly	1348	254	36604	106223	4224942	0.2894	0	0	0	ST1
GCA_900013895.1_Clostridioides_difficile_VL_0305_Contig_ST1	Genome assembly	310	69	149863	456719	4159239	0.2859	0	0	0	ST1
GCA_900013955.1_Clostridioides_difficile_VL_0318_Contig_ST1	Genome assembly	1291	188	51064	145699	4233154	0.2889	0	0	0	ST1
GCA_900014035.1_Clostridioides_difficile_VL_0329_Contig_ST1	Genome assembly	1274	220	42120	211368	4280346	0.2913	0	0	0	ST1
GCA_900014055.1_Clostridioides_difficile_VL_0335_Contig_ST1	Genome assembly	1463	193	51750	236273	4260005	0.2906	0	0	0	ST1
GCA_900014085.1_Clostridioides_difficile_VL_0340_Contig_ST1	Genome assembly	1176	217	49933	236515	4244007	0.2894	0	0	0	ST1
GCA_900014105.1_Clostridioides_difficile_VL_0344_Contig_ST1	Genome assembly	782	274	28266	144466	4147187	0.2874	0	0	0	ST1
GCA_900014155.1_Clostridioides_difficile_VL_0316_Contig_ST1	Genome assembly	713	157	62793	221991	4217072	0.2892	0	0	0	ST1
GCA_900014195.1_Clostridioides_difficile_VL_0451_Contig_ST1	Genome assembly	789	263	32792	151508	4141665	0.2873	0	0	0	ST1
GCA_900014245.1_Clostridioides_difficile_VL_0131_Contig_ST1	Genome assembly	1312	217	38336	148706	4228318	0.2895	0	0	0	ST1
GCA_900014295.1_Clostridioides_difficile_VL_0362_Contig_ST1	Genome assembly	370	151	51753	142299	4146582	0.2852	0	0	0	ST1
GCA_900014415.1_Clostridioides_difficile_VL_0354_Contig_ST1	Genome assembly	470	225	38079	133103	4115446	0.286	0	0	0	ST1
GCA_900014495.1_Clostridioides_difficile_VL_0381_Contig_ST1	Genome assembly	1155	162	61994	332967	4237944	0.2892	0	0	0	ST1
GCA_900014535.1_Clostridioides_difficile_VL_0389_Contig_ST1	Genome assembly	1049	139	99986	383105	4225987	0.2894	0	0	0	ST1
GCA_900014585.1_Clostridioides_difficile_VL_0400_Contig_ST1	Genome assembly	386	128	57665	230448	4124447	0.2853	0	0	0	ST1
GCA_900014635.1_Clostridioides_difficile_VL_0405_Contig_ST1	Genome assembly	708	276	27400	138978	4123752	0.2856	0	0	0	ST1
GCA_900014655.1_Clostridioides_difficile_VL_0414_Contig_ST1	Genome assembly	369	142	56163	177256	4124988	0.2854	0	0	0	ST1
GCA_900014755.1_Clostridioides_difficile_VL_0460_Contig_ST1	Genome assembly	325	76	114096	299213	4130158	0.2853	0	0	0	ST1
GCA_900014765.1_Clostridioides_difficile_VL_0461_Contig_ST1	Genome assembly	528	344	21356	86870	4082402	0.285	0	0	0	ST1
GCA_900014895.1_Clostridioides_difficile_VL_0121_Contig_ST1	Genome assembly	876	138	81880	247386	4164652	0.2888	0	0	0	ST1
GCA_900014945.1_Clostridioides_difficile_VL_0417_Contig_ST1	Genome assembly	343	70	129218	407433	4130169	0.2852	0	0	0	ST1
GCA_900015025.1_Clostridioides_difficile_VL_0075_Contig_ST1	Genome assembly	1273	181	46297	139622	4195561	0.2889	0	0	0	ST1
GCA_900015035.1_Clostridioides_difficile_VL_0124_Contig_ST1	Genome assembly	1492	448	16586	66230	4181551	0.2902	0	0	0	ST1
GCA_900015075.1_Clostridioides_difficile_VL_0423_Contig_ST1	Genome assembly	1427	303	28259	101906	4244163	0.2897	0	0	0	ST1
GCA_900015115.1_Clostridioides_difficile_VL_0249_Contig_ST1	Genome assembly	418	154	50197	277643	4119571	0.2857	0	0	0	ST1
GCA_900015135.1_Clostridioides_difficile_VL_0317_Contig_ST1	Genome assembly	1416	190	51701	191420	4238511	0.2891	0	0	0	ST1
GCA_900015145.1_Clostridioides_difficile_VL_0323_Contig_ST1	Genome assembly	1156	135	88999	407350	4191107	0.2879	0	0	0	ST1
GCA_900015155.1_Clostridioides_difficile_VL_0374_Contig_ST1	Genome assembly	1431	152	82902	353424	4245244	0.2898	0	0	0	ST1
GCA_900015255.1_Clostridioides_difficile_VL_0207_Contig_ST1	Genome assembly	829	112	114254	309551	4204230	0.2886	0	0	0	ST1
GCA_900015325.1_Clostridioides_difficile_VL_0186_Contig_ST1	Genome assembly	828	229	41997	128654	4177724	0.288	0	0	0	ST1
GCA_900015335.1_Clostridioides_difficile_VL_0188_Contig_ST1	Genome assembly	471	251	34094	121606	4150819	0.2858	0	0	0	ST1
GCA_900015365.1_Clostridioides_difficile_VL_0379_Contig_ST1	Genome assembly	1492	263	31678	119553	4253946	0.2899	0	0	0	ST1
GCA_900015575.1_Clostridioides_difficile_VL_0021_Contig_ST1	Genome assembly	369	153	55224	171113	4116523	0.2856	0	0	0	ST1
GCA_900015585.1_Clostridioides_difficile_VL_0042_Contig_ST1	Genome assembly	377	141	66649	237385	4132263	0.2857	0	0	0	ST1
GCA_900015645.1_Clostridioides_difficile_VL_0257_Contig_ST1	Genome assembly	634	332	24091	99668	4113238	0.2866	0	0	0	ST1
GCA_900016335.1_Clostridioides_difficile_VL_0385_Contig_ST1	Genome assembly	1106	236	38015	174824	4195685	0.2881	0	0	0	ST1
GCA_900016345.1_Clostridioides_difficile_VL_0386_Contig_ST1	Genome assembly	1300	192	55029	205275	4217278	0.2888	0	0	0	ST1
GCA_900019305.1_Clostridioides_difficile_VL_0036_Contig_ST1	Genome assembly	477	119	84801	212948	4144702	0.286	0	0	0	ST1
GCA_000449025.2_Clostridioides_difficile_CD43_Contig_ST10	Genome assembly	106	106	89597	183801	4329033	0.2824	0	0	0	ST10
GCA_000449305.2_Clostridioides_difficile_CD131_Contig_ST10	Genome assembly	134	134	57300	139160	4320519	0.2823	0	0	0	ST10
GCA_000449385.2_Clostridioides_difficile_CD149_Contig_ST10	Genome assembly	81	81	106426	294973	4333776	0.2821	0	0	0	ST10
GCA_000449465.2_Clostridioides_difficile_CD166_Contig_ST10	Genome assembly	56	56	222760	427641	4289366	0.282	0	0	0	ST10
GCA_000450725.2_Clostridioides_difficile_F152_Contig_ST10	Genome assembly	18	18	582123	738093	4353275	0.2829	0	0	0	ST10
GCA_000451585.2_Clostridioides_difficile_P8_Contig_ST10	Genome assembly	203	199	44870	152150	4292666	0.2824	0	0	0	ST10
GCA_000452065.2_Clostridioides_difficile_P69_Contig_ST10	Genome assembly	49	49	228563	423949	4213133	0.2837	0	0	0	ST10
GCA_000452405.2_Clostridioides_difficile_CD86_Contig_ST10	Genome assembly	156	155	50837	178319	4347426	0.2822	0	0	0	ST10
GCA_001972185.1_Clostridioides_difficile_20121190_Contig_ST10	Genome assembly	10	10	4056063	4056063	4469133	0.285	0	0	0	ST10
GCA_002301095.1_Clostridioides_difficile_5491-N-ST10_Contig_ST10	Genome assembly	84	55	231714	468955	4215713	0.2832	0	0	0	ST10
GCA_002302145.1_Clostridioides_difficile_7458-N-ST10_Contig_ST10	Genome assembly	488	224	123976	278795	4545181	0.2914	0	0	0	ST10
GCA_002303365.1_Clostridioides_difficile_6610-N-ST10_Contig_ST10	Genome assembly	620	581	12264	65497	4293394	0.2849	0	0	0	ST10
GCA_002303505.1_Clostridioides_difficile_6620-N-ST10_Contig_ST10	Genome assembly	131	107	72506	251419	4342698	0.283	0	0	0	ST10
GCA_002303525.1_Clostridioides_difficile_6621-NonSp-ST10_Contig_ST10	Genome assembly	905	295	107919	295539	4670715	0.2974	0	0	0	ST10
GCA_900008775.1_Clostridioides_difficile_VL_0333_Contig_ST10	Genome assembly	336	167	56366	216950	4344794	0.2829	0	0	0	ST10
GCA_900010895.1_Clostridioides_difficile_VL_0085_Contig_ST10	Genome assembly	264	79	145604	317736	4420573	0.284	0	0	0	ST10
GCA_900011075.1_Clostridioides_difficile_VL_0084_Contig_ST10	Genome assembly	516	300	27273	140296	4314388	0.2837	0	0	0	ST10
GCA_900011145.1_Clostridioides_difficile_VL_0282_Contig_ST10	Genome assembly	1208	234	48382	200936	4421107	0.2854	0	0	0	ST10
GCA_900015925.1_Clostridioides_difficile_VL_0443_Contig_ST102	Genome assembly	1341	201	56314	201682	4373587	0.2898	0	0	0	ST102
GCA_002302975.1_Clostridioides_difficile_7488-NonSp-ST103_Contig_ST103	Genome assembly	308	285	27888	91814	4169960	0.285	0	0	0	ST103
GCA_900013185.1_Clostridioides_difficile_VL_0055_Contig_ST103	Genome assembly	266	82	138246	243732	4155773	0.285	0	0	0	ST103
GCA_900073125.1_Clostridioides_difficile_CD105KSE5_Contig_ST107	Genome assembly	378	52	277022	702167	4395161	0.2908	0	0	0	ST107
GCA_900074825.1_Clostridioides_difficile_CD105KSE11_Contig_ST107	Genome assembly	514	258	147778	315064	4531630	0.2896	0	0	0	ST107
GCA_000451145.2_Clostridioides_difficile_Y247_Contig_ST110	Genome assembly	44	44	199386	530080	4053085	0.2843	0	0	0	ST110
GCA_000452105.2_Clostridioides_difficile_P72_Contig_ST110	Genome assembly	44	44	207373	524807	4057420	0.2848	0	0	0	ST110
GCA_002301185.1_Clostridioides_difficile_5496-Y-ST110_Contig_ST110	Genome assembly	91	53	170092	479118	4099996	0.2854	0	0	0	ST110
GCA_002301985.1_Clostridioides_difficile_6593-Y-ST110_Contig_ST110	Genome assembly	281	248	35273	139159	4131908	0.2868	0	0	0	ST110
GCA_002302205.1_Clostridioides_difficile_7464-Y-ST110_Contig_ST110	Genome assembly	419	183	97634	231800	4280374	0.2921	0	0	0	ST110
GCA_002303635.1_Clostridioides_difficile_6626-Y-ST110_Contig_ST110	Genome assembly	157	93	105512	269180	4147623	0.2863	0	0	0	ST110
GCA_900014555.1_Clostridioides_difficile_VL_0394_Contig_ST110	Genome assembly	1416	201	52452	203968	4240474	0.2912	0	0	0	ST110
GCA_900015045.1_Clostridioides_difficile_VL_0284_Contig_ST110	Genome assembly	308	129	61856	227398	4083960	0.2854	0	0	0	ST110
GCA_001972105.1_Clostridioides_difficile_20111003_Contig_ST12	Genome assembly	3	3	2285964	2285964	4200115	0.286	0	0	0	ST12
GCA_000452005.1_Clostridioides_difficile_P59_Contig_ST123	Genome assembly	68	68	123083	413328	4223549	0.2843	0	0	0	ST123
GCA_900011705.1_Clostridioides_difficile_VL_0416_Contig_ST126	Genome assembly	902	287	33429	111619	4240090	0.285	0	0	0	ST126
GCA_900008725.1_Clostridioides_difficile_VL_0265_Contig_ST129	Genome assembly	1445	625	10884	52721	4129591	0.2922	0	0	0	ST129
GCA_002303585.1_Clostridioides_difficile_6624-Y-ST13_Contig_ST13	Genome assembly	83	41	203625	545882	4216201	0.2848	0	0	0	ST13
GCA_000450445.2_Clostridioides_difficile_DA00211_Contig_ST139	Genome assembly	90	90	88029	197972	4072757	0.283	0	0	0	ST139
GCA_000448805.2_Clostridioides_difficile_DA00189_Contig_ST14	Genome assembly	111	111	64947	169118	4093536	0.2834	0	0	0	ST14
GCA_000448925.2_Clostridioides_difficile_CD38_Contig_ST14	Genome assembly	122	122	63409	162012	4046775	0.2838	0	0	0	ST14
GCA_000449125.2_Clostridioides_difficile_CD49_Contig_ST14	Genome assembly	109	109	67759	237124	4234199	0.2833	0	0	0	ST14
GCA_000449965.2_Clostridioides_difficile_DA00114_Contig_ST14	Genome assembly	165	165	46799	151757	4058203	0.284	0	0	0	ST14
GCA_000450265.2_Clostridioides_difficile_DA00174_Contig_ST14	Genome assembly	129	129	57356	275058	4068098	0.2833	0	0	0	ST14
GCA_000451285.2_Clostridioides_difficile_CD111_Contig_ST14	Genome assembly	240	240	35117	123305	4047257	0.2835	0	0	0	ST14
GCA_000451465.2_Clostridioides_difficile_DA00256_Contig_ST14	Genome assembly	529	528	10727	54036	3837243	0.285	0	0	0	ST14
GCA_000452425.2_Clostridioides_difficile_CD88_Contig_ST14	Genome assembly	130	129	70271	184362	4236893	0.2835	0	0	0	ST14
GCA_000473665.2_Clostridioides_difficile_P64_Contig_ST14	Genome assembly	72	70	184824	507749	4226724	0.2859	0	0	0	ST14
GCA_001972165.1_Clostridioides_difficile_20121013_Contig_ST14	Genome assembly	6	6	3491085	3491085	4291712	0.2874	0	0	0	ST14
GCA_900011815.1_Clostridioides_difficile_VL_0048_Contig_ST14	Genome assembly	245	84	199899	505370	4175645	0.2848	0	0	0	ST14
GCA_900012795.1_Clostridioides_difficile_VL_0187_Contig_ST14	Genome assembly	820	271	34384	117926	4212143	0.2886	0	0	0	ST14
GCA_900014075.1_Clostridioides_difficile_VL_0337_Contig_ST14	Genome assembly	438	99	131074	318466	4212425	0.2854	0	0	0	ST14
GCA_900014275.1_Clostridioides_difficile_VL_0179_Contig_ST14	Genome assembly	759	401	21473	87042	4267519	0.2867	0	0	0	ST14
GCA_000448765.2_Clostridioides_difficile_CD34_Contig_ST15	Genome assembly	48	48	233956	727427	4017712	0.2824	0	0	0	ST15
GCA_000449705.2_Clostridioides_difficile_CD211_Contig_ST15	Genome assembly	187	187	42827	138683	4054786	0.2843	0	0	0	ST15
GCA_000452265.2_Clostridioides_difficile_F200_Contig_ST15	Genome assembly	49	49	245794	514269	4155960	0.2862	0	0	0	ST15
GCA_000452285.2_Clostridioides_difficile_F480_Contig_ST15	Genome assembly	32	32	241744	620783	3989604	0.2827	0	0	0	ST15
GCA_000452305.2_Clostridioides_difficile_F525_Contig_ST15	Genome assembly	43	43	242639	542664	4031328	0.2828	0	0	0	ST15
GCA_000452325.2_Clostridioides_difficile_F548_Contig_ST15	Genome assembly	17	17	695337	1298909	4257706	0.2866	0	0	0	ST15
GCA_000473605.2_Clostridioides_difficile_P41_Contig_ST15	Genome assembly	62	62	234033	483415	4119865	0.2843	0	0	0	ST15
GCA_000586575.1_Clostridioides_difficile_5_3_Contig_ST15	Genome assembly	27	27	786725	1447561	4009318	0.2832	0	0	0	ST15
GCA_000939295.1_Clostridioides_difficile_Scaffold_ST15	Genome assembly	140	140	135229	432595	4142682	0.2837	0	0	0	ST15
GCA_001192735.1_Clostridioides_difficile_KY62_Contig_ST15	Genome assembly	277	56	187206	461765	4040078	0.2841	0	0	0	ST15
GCA_001263655.1_Clostridioides_difficile_KY64_Contig_ST15	Genome assembly	324	58	180982	655350	4035637	0.284	0	0	0	ST15
GCA_001263675.1_Clostridioides_difficile_KY65_Contig_ST15	Genome assembly	267	50	268287	617099	4037225	0.284	0	0	0	ST15
GCA_001263695.1_Clostridioides_difficile_RU_17_Contig_ST15	Genome assembly	270	60	135326	273147	3996382	0.284	0	0	0	ST15
GCA_002301105.1_Clostridioides_difficile_5492-M-ST15_Contig_ST15	Genome assembly	98	69	148694	409864	4123370	0.2841	0	0	0	ST15
GCA_002302885.1_Clostridioides_difficile_7480-M-ST15_Contig_ST15	Genome assembly	223	191	42432	153405	4063663	0.285	0	0	0	ST15
GCA_002303125.1_Clostridioides_difficile_7498-M-ST15_Contig_ST15	Genome assembly	186	101	148661	512714	4277963	0.287	4	0	0	ST15
GCA_900007655.1_Clostridioides_difficile_VL_0271_Contig_ST15	Genome assembly	1219	219	58924	312956	4237297	0.2878	0	0	0	ST15
GCA_900008475.1_Clostridioides_difficile_VL_0267_Contig_ST15	Genome assembly	527	89	230124	668896	4113217	0.2856	0	0	0	ST15
GCA_900008635.1_Clostridioides_difficile_VL_0429_Contig_ST15	Genome assembly	323	166	46838	190376	4113210	0.2846	0	0	0	ST15
GCA_900009405.1_Clostridioides_difficile_VL_0052_Contig_ST15	Genome assembly	214	76	161786	480355	4208030	0.2848	0	0	0	ST15
GCA_900009455.1_Clostridioides_difficile_VL_0350_Contig_ST15	Genome assembly	533	121	144278	530645	4193230	0.2848	0	0	0	ST15
GCA_900009805.1_Clostridioides_difficile_VL_0135_Contig_ST15	Genome assembly	218	70	202085	410697	4282195	0.2835	0	0	0	ST15
GCA_900010965.1_Clostridioides_difficile_VL_0418_Contig_ST15	Genome assembly	1178	194	81542	389413	4233182	0.2869	0	0	0	ST15
GCA_900011855.1_Clostridioides_difficile_VL_0068_Contig_ST15	Genome assembly	737	120	179978	738819	4172039	0.2858	0	0	0	ST15
GCA_900011925.1_Clostridioides_difficile_VL_0083_Contig_ST15	Genome assembly	386	151	54746	171777	4231945	0.2884	0	0	0	ST15
GCA_900012235.1_Clostridioides_difficile_VL_0155_Contig_ST15	Genome assembly	878	292	26416	99328	4108564	0.2864	0	0	0	ST15
GCA_900012925.1_Clostridioides_difficile_VL_0209_Contig_ST15	Genome assembly	1224	342	21451	104537	4124939	0.287	0	0	0	ST15
GCA_900012955.1_Clostridioides_difficile_VL_0213_Contig_ST15	Genome assembly	702	473	15197	63392	4067707	0.2852	0	0	0	ST15
GCA_900013105.1_Clostridioides_difficile_VL_0230_Contig_ST15	Genome assembly	984	180	69057	213808	4158188	0.2865	0	0	0	ST15
GCA_900014165.1_Clostridioides_difficile_VL_0359_Contig_ST15	Genome assembly	215	134	58622	199771	4095701	0.2834	0	0	0	ST15
GCA_900014595.1_Clostridioides_difficile_VL_0402_Contig_ST15	Genome assembly	1058	198	76498	452108	4263410	0.289	0	0	0	ST15
GCA_900015125.1_Clostridioides_difficile_VL_0283_Contig_ST15	Genome assembly	414	163	66572	220301	4131621	0.2865	0	0	0	ST15
GCA_900015165.1_Clostridioides_difficile_VL_0375_Contig_ST15	Genome assembly	366	157	63236	190579	4144528	0.2852	0	0	0	ST15
GCA_900074835.1_Clostridioides_difficile_CD105KSE9_Contig_ST15	Genome assembly	214	106	95019	258170	4339832	0.2863	0	0	0	ST15
GCA_900012125.1_Clostridioides_difficile_VL_0123_Contig_ST16	Genome assembly	267	150	65991	238836	4394265	0.2902	0	0	0	ST16
GCA_001497755.1_Clostridioides_difficile_IT1118_Contig_ST17	Genome assembly	256	197	72241	178925	4238925	0.2855	0	0	0	ST17
GCA_001678145.1_Clostridioides_difficile_CD8_15_Contig_ST17	Genome assembly	44	44	235991	831956	4249791	0.2863	0	0	0	ST17
GCA_001972045.1_Clostridioides_difficile_20110740_Contig_ST17	Genome assembly	9	9	3058973	3058973	4279635	0.2867	0	0	0	ST17
GCA_900008315.1_Clostridioides_difficile_VL_0030_Contig_ST17	Genome assembly	1490	212	58849	161915	4326858	0.2894	0	0	0	ST17
GCA_900012285.1_Clostridioides_difficile_VL_0170_Contig_ST18	Genome assembly	947	179	53644	179780	4248605	0.2907	0	0	0	ST18
GCA_900011365.1_Clostridioides_difficile_VL_0045_Contig_ST19	Genome assembly	1245	232	35725	123043	4211773	0.2907	0	0	0	ST19
GCA_000448745.2_Clostridioides_difficile_CD21_Contig_ST2	Genome assembly	159	159	47920	208274	4041992	0.2846	0	0	0	ST2
GCA_000449205.2_Clostridioides_difficile_DA00306_Contig_ST2	Genome assembly	68	68	112036	470762	4080248	0.2838	0	0	0	ST2
GCA_000449225.2_Clostridioides_difficile_CD70_Contig_ST2	Genome assembly	184	182	45635	133376	4055978	0.2844	0	0	0	ST2
GCA_000449245.2_Clostridioides_difficile_CD109_Contig_ST2	Genome assembly	146	145	60612	161298	4109854	0.284	0	0	0	ST2
GCA_000449365.2_Clostridioides_difficile_CD144_Contig_ST2	Genome assembly	56	56	184803	529976	4095302	0.2845	0	0	0	ST2
GCA_000449925.2_Clostridioides_difficile_DA00062_Contig_ST2	Genome assembly	158	158	43563	221683	4066705	0.2845	0	0	0	ST2
GCA_000450045.2_Clostridioides_difficile_DA00131_Contig_ST2	Genome assembly	140	140	53257	166614	4080324	0.2836	0	0	0	ST2
GCA_000450525.2_Clostridioides_difficile_DA00232_Contig_ST2	Genome assembly	123	120	64915	184786	3994530	0.2831	0	0	0	ST2
GCA_000450585.2_Clostridioides_difficile_DA00245_Contig_ST2	Genome assembly	336	330	20188	63179	3985935	0.2844	0	0	0	ST2
GCA_000450645.2_Clostridioides_difficile_P21_Contig_ST2	Genome assembly	53	52	162302	530479	4090537	0.2847	0	0	0	ST2
GCA_000450705.2_Clostridioides_difficile_DA00313_Contig_ST2	Genome assembly	112	112	70240	171214	4083557	0.2838	0	0	0	ST2
GCA_000450845.2_Clostridioides_difficile_Y21_Contig_ST2	Genome assembly	225	225	33405	140035	4079115	0.284	0	0	0	ST2
GCA_000450905.2_Clostridioides_difficile_Y401_Contig_ST2	Genome assembly	205	204	35327	150908	4000151	0.284	0	0	0	ST2
GCA_000451205.2_Clostridioides_difficile_CD90_Contig_ST2	Genome assembly	123	123	74899	184253	4029007	0.2832	0	0	0	ST2
GCA_000451565.2_Clostridioides_difficile_P3_Contig_ST2	Genome assembly	169	163	44025	161903	3994585	0.2827	0	0	0	ST2
GCA_000452045.2_Clostridioides_difficile_P78_Contig_ST2	Genome assembly	60	60	181575	530836	4119601	0.2846	0	0	0	ST2
GCA_000452205.2_Clostridioides_difficile_P77_Contig_ST2	Genome assembly	61	59	188876	530997	4155874	0.2858	0	0	0	ST2
GCA_000473565.2_Clostridioides_difficile_DA00130_Contig_ST2	Genome assembly	140	140	53257	166614	4080324	0.2836	0	0	0	ST2
GCA_000473585.2_Clostridioides_difficile_P33_Contig_ST2	Genome assembly	57	57	150350	531179	4103431	0.2857	0	0	0	ST2
GCA_001577795.1_Clostridioides_difficile_08ACD0030_Complete_Genome_ST2	Genome assembly	1		4167076	4167076	4167076	0.2882	0	0	0	ST2
GCA_001939005.1_Clostridioides_difficile_01A09CD0020_Contig_ST2	Genome assembly	103	103	116608	296601	4211492	0.2889	0	0	0	ST2
GCA_001971985.1_Clostridioides_difficile_20111144_Contig_ST2	Genome assembly	13	13	2732843	2732843	4259046	0.2893	0	0	0	ST2
GCA_001972135.1_Clostridioides_difficile_20120956_Contig_ST2	Genome assembly	37	37	625650	821873	4231170	0.2879	0	0	0	ST2
GCA_002300995.1_Clostridioides_difficile_5485-Y-ST2_Contig_ST2	Genome assembly	200	158	60080	175475	4075180	0.2861	0	0	0	ST2
GCA_002301015.1_Clostridioides_difficile_5486-Y-ST2_Contig_ST2	Genome assembly	132	60	174416	422077	4133323	0.2875	3	0	0	ST2
GCA_002301265.1_Clostridioides_difficile_5503-Y-ST2_Contig_ST2	Genome assembly	167	135	68202	172215	4191900	0.2864	0	0	0	ST2
GCA_002301395.1_Clostridioides_difficile_5505-Y-ST2_Contig_ST2	Genome assembly	526	259	97468	328525	4389482	0.2962	0	0	0	ST2
GCA_002301455.1_Clostridioides_difficile_5542-Y-ST2_Contig_ST2	Genome assembly	291	171	102919	350871	4200954	0.2904	0	0	0	ST2
GCA_002301495.1_Clostridioides_difficile_5548-Y-ST2_Contig_ST2	Genome assembly	681	240	119446	278639	4448167	0.297	0	0	0	ST2
GCA_002301705.1_Clostridioides_difficile_5539-Y-ST2_Contig_ST2	Genome assembly	550	253	141290	319815	4337457	0.297	0	0	0	ST2
GCA_002302055.1_Clostridioides_difficile_7451-NonSp-ST2_Contig_ST2	Genome assembly	99	59	191887	377515	4162356	0.2863	0	0	0	ST2
GCA_002302075.1_Clostridioides_difficile_7453-Y-ST2_Contig_ST2	Genome assembly	78	50	204835	334445	4107326	0.2851	0	0	0	ST2
GCA_002302805.1_Clostridioides_difficile_7476-Y-ST2_Contig_ST2	Genome assembly	92	57	188536	319698	4148739	0.2863	0	0	0	ST2
GCA_002303215.1_Clostridioides_difficile_7505-Y-ST2_Contig_ST2	Genome assembly	372	259	50074	144368	4263039	0.292	0	0	0	ST2
GCA_002303225.1_Clostridioides_difficile_6603-Y-ST2_Contig_ST2	Genome assembly	1032	966	6424	34958	4020058	0.2911	0	0	0	ST2
GCA_002303605.1_Clostridioides_difficile_6625-Y-ST2_Contig_ST2	Genome assembly	361	310	30084	95129	4198923	0.2877	0	0	0	ST2
GCA_900007605.1_Clostridioides_difficile_VL_0047_Contig_ST2	Genome assembly	848	487	14575	77604	4199805	0.2882	0	0	0	ST2
GCA_900008335.1_Clostridioides_difficile_VL_0028_Contig_ST2	Genome assembly	1345	201	52244	188014	4266753	0.2877	0	0	0	ST2
GCA_900008565.1_Clostridioides_difficile_VL_0342_Contig_ST2	Genome assembly	429	197	45801	217228	4195746	0.2865	0	0	0	ST2
GCA_900010345.1_Clostridioides_difficile_VL_0140_Contig_ST2	Genome assembly	339	136	99595	280166	4202348	0.2863	0	0	0	ST2
GCA_900010855.1_Clostridioides_difficile_VL_0029_Contig_ST2	Genome assembly	813	92	188178	312998	4203090	0.2893	0	0	0	ST2
GCA_900011095.1_Clostridioides_difficile_VL_0175_Contig_ST2	Genome assembly	1215	460	16661	66234	4179713	0.2905	0	0	0	ST2
GCA_900011805.1_Clostridioides_difficile_VL_0031_Contig_ST2	Genome assembly	496	119	108591	525208	4163031	0.2871	0	0	0	ST2
GCA_900011835.1_Clostridioides_difficile_VL_0064_Contig_ST2	Genome assembly	1122	277	33611	156848	4240009	0.2894	0	0	0	ST2
GCA_900011845.1_Clostridioides_difficile_VL_0065_Contig_ST2	Genome assembly	556	270	32995	163721	4203145	0.2863	0	0	0	ST2
GCA_900011995.1_Clostridioides_difficile_VL_0100_Contig_ST2	Genome assembly	1327	246	40788	196044	4235961	0.29	0	0	0	ST2
GCA_900012255.1_Clostridioides_difficile_VL_0159_Contig_ST2	Genome assembly	317	99	135402	529867	4210025	0.2861	0	0	0	ST2
GCA_900013125.1_Clostridioides_difficile_VL_0233_Contig_ST2	Genome assembly	1373	230	43253	171389	4288873	0.2902	0	0	0	ST2
GCA_900013695.1_Clostridioides_difficile_VL_0252_Contig_ST2	Genome assembly	906	123	138886	321052	4295142	0.2889	0	0	0	ST2
GCA_900013865.1_Clostridioides_difficile_VL_0288_Contig_ST2	Genome assembly	985	206	58939	232971	4251573	0.2888	0	0	0	ST2
GCA_900013925.1_Clostridioides_difficile_VL_0309_Contig_ST2	Genome assembly	1087	209	41881	131516	4224335	0.289	0	0	0	ST2
GCA_900013965.1_Clostridioides_difficile_VL_0320_Contig_ST2	Genome assembly	454	168	49516	193396	4133695	0.2878	0	0	0	ST2
GCA_900014185.1_Clostridioides_difficile_VL_0372_Contig_ST2	Genome assembly	832	471	16501	95476	4158449	0.2879	0	0	0	ST2
GCA_900014465.1_Clostridioides_difficile_VL_0366_Contig_ST2	Genome assembly	1080	272	34958	154698	4253174	0.2891	0	0	0	ST2
GCA_900014475.1_Clostridioides_difficile_VL_0377_Contig_ST2	Genome assembly	1293	157	57600	266516	4252484	0.2891	0	0	0	ST2
GCA_900014575.1_Clostridioides_difficile_VL_0399_Contig_ST2	Genome assembly	551	181	56158	199307	4161164	0.2871	0	0	0	ST2
GCA_900014785.1_Clostridioides_difficile_VL_0463_Contig_ST2	Genome assembly	919	301	28006	89140	4208295	0.287	0	0	0	ST2
GCA_900014855.1_Clostridioides_difficile_VL_0038_Contig_ST2	Genome assembly	294	116	63209	211350	4099858	0.2851	0	0	0	ST2
GCA_900015095.1_Clostridioides_difficile_VL_0041_Contig_ST2	Genome assembly	295	100	115952	357151	4186928	0.2853	0	0	0	ST2
GCA_900015225.1_Clostridioides_difficile_VL_0098_Contig_ST2	Genome assembly	355	162	72119	295716	4209713	0.2863	0	0	0	ST2
GCA_900015275.1_Clostridioides_difficile_VL_0332_Contig_ST2	Genome assembly	1218	284	33635	110687	4270238	0.2909	0	0	0	ST2
GCA_900015625.1_Clostridioides_difficile_VL_0195_Contig_ST2	Genome assembly	1191	203	45708	216050	4222266	0.2896	0	0	0	ST2
GCA_900015665.1_Clostridioides_difficile_VL_0367_Contig_ST2	Genome assembly	982	197	66617	219185	4279469	0.2889	0	0	0	ST2
GCA_900015675.1_Clostridioides_difficile_VL_0426_Contig_ST2	Genome assembly	370	137	70763	273466	4204351	0.2862	0	0	0	ST2
GCA_900016315.1_Clostridioides_difficile_VL_0310_Contig_ST2	Genome assembly	301	169	55868	245779	4103169	0.2863	0	0	0	ST2
GCA_900165795.1_Clostridioides_difficile_VRECD0093_Contig_ST2	Genome assembly	23	19	580198	1035782	4086466	0.2852	3	0	0	ST2
GCA_900008605.1_Clostridioides_difficile_VL_0391_Contig_ST201	Genome assembly	1092	242	42712	168160	4160703	0.2899	0	0	0	ST201
GCA_900014225.1_Clostridioides_difficile_VL_0104_Contig_ST201	Genome assembly	261	101	88166	321131	4068388	0.2867	0	0	0	ST201
GCA_002301505.1_Clostridioides_difficile_5549-NonSp-ST21_Contig_ST21	Genome assembly	258	218	52465	150708	4214848	0.2902	0	0	0	ST21
GCA_900011875.1_Clostridioides_difficile_VL_0076_Contig_ST21	Genome assembly	1351	223	40123	152828	4130627	0.2868	0	0	0	ST21
GCA_900014285.1_Clostridioides_difficile_VL_0225_Contig_ST21	Genome assembly	1303	134	87383	316696	4184394	0.289	0	0	0	ST21
GCA_000449185.2_Clostridioides_difficile_CD69_Contig_ST221	Genome assembly	59	59	104280	316362	3991067	0.2866	0	0	0	ST221
GCA_001704755.1_Clostridioides_difficile_106_Contig_ST221	Genome assembly	106	69	137376	345939	4044391	0.2868	0	0	0	ST221
GCA_002300855.1_Clostridioides_difficile_5479-NonSp-ST229_Contig_ST229	Genome assembly	173	92	170235	407079	4262489	0.2849	2	0	0	ST229
GCA_900014025.1_Clostridioides_difficile_VL_0328_Contig_ST231	Genome assembly	1462	111	207853	432523	4353737	0.2876	0	0	0	ST231
GCA_900013635.1_Clostridioides_difficile_VL_0243_Contig_ST236	Genome assembly	756	98	148550	536139	4167252	0.2854	0	0	0	ST236
GCA_000451765.1_Clostridioides_difficile_P30_Contig_ST26	Genome assembly	54	54	194493	406261	4181432	0.2864	0	0	0	ST26
GCA_000451865.2_Clostridioides_difficile_P42_Contig_ST26	Genome assembly	53	53	195731	435204	4185941	0.2861	0	0	0	ST26
GCA_000821005.1_Clostridioides_difficile_CII7xCD13A_Contig_ST26	Genome assembly	103	74	125520	386962	4282024	0.287	5	0	0	ST26
GCA_002301735.1_Clostridioides_difficile_6584-AQ-ST26_Contig_ST26	Genome assembly	180	114	107247	276633	4287612	0.2885	0	0	0	ST26
GCA_900011715.1_Clostridioides_difficile_VL_0419_Contig_ST26	Genome assembly	530	320	24952	106998	4238377	0.289	0	0	0	ST26
GCA_900012225.1_Clostridioides_difficile_VL_0152_Contig_ST26	Genome assembly	391	110	128430	260118	4275430	0.2883	0	0	0	ST26
GCA_900013755.1_Clostridioides_difficile_VL_0261_Contig_ST26	Genome assembly	485	266	31684	118728	4256753	0.2886	0	0	0	ST26
GCA_900164115.1_Clostridioides_difficile_VRECD0142_Contig_ST26	Genome assembly	33	25	582590	1408732	4282662	0.2887	3	0	0	ST26
GCA_900014625.1_Clostridioides_difficile_VL_0406_Contig_ST27	Genome assembly	869	152	91467	418500	4339169	0.2914	0	0	0	ST27
GCA_002303245.1_Clostridioides_difficile_6612-DH-ST28_Contig_ST28	Genome assembly	141	92	115270	249212	4096936	0.2859	0	0	0	ST28
GCA_000451825.1_Clostridioides_difficile_P38_Contig_ST29	Genome assembly	67	67	157427	297321	4123891	0.2872	0	0	0	ST29
GCA_001757615.1_Clostridioides_difficile_H3_Contig_ST29	Genome assembly	76	75	217879	485192	4138192	0.2875	2	0	0	ST29
GCA_000242355.2_Clostridioides_difficile_CD37_Contig_ST3	Genome assembly	245	173	60058	234232	4010233	0.2856	0	0	0	ST3
GCA_000448965.2_Clostridioides_difficile_CD40_Contig_ST3	Genome assembly	97	97	100634	221181	4069381	0.2864	0	0	0	ST3
GCA_000449105.2_Clostridioides_difficile_CD47_Contig_ST3	Genome assembly	129	129	77417	313469	4185732	0.2842	0	0	0	ST3
GCA_000449265.2_Clostridioides_difficile_DA00273_Contig_ST3	Genome assembly	271	271	25512	106938	4095984	0.2844	0	0	0	ST3
GCA_000449485.2_Clostridioides_difficile_CD169_Contig_ST3	Genome assembly	51	51	211907	498923	4009115	0.2849	0	0	0	ST3
GCA_000449545.2_Clostridioides_difficile_CD178_Contig_ST3	Genome assembly	121	121	60329	163861	4009922	0.2851	0	0	0	ST3
GCA_000449585.2_Clostridioides_difficile_CD181_Contig_ST3	Genome assembly	96	96	107157	239198	4338534	0.2873	0	0	0	ST3
GCA_000449745.1_Clostridioides_difficile_342_Contig_ST3	Genome assembly	133	132	56519	170639	4045993	0.2833	0	0	0	ST3
GCA_000450005.2_Clostridioides_difficile_DA00128_Contig_ST3	Genome assembly	95	95	88258	258711	4217009	0.2836	0	0	0	ST3
GCA_000450085.2_Clostridioides_difficile_DA00134_Contig_ST3	Genome assembly	98	98	107219	424715	4115079	0.2868	0	0	0	ST3
GCA_000450105.2_Clostridioides_difficile_DA00141_Contig_ST3	Genome assembly	52	52	130697	383864	4089728	0.2877	1	0	0	ST3
GCA_000450245.2_Clostridioides_difficile_DA00167_Contig_ST3	Genome assembly	135	135	56326	258702	4109406	0.2847	0	0	0	ST3
GCA_000450485.2_Clostridioides_difficile_DA00215_Contig_ST3	Genome assembly	110	106	68396	201201	3984681	0.2839	0	0	0	ST3
GCA_000450545.2_Clostridioides_difficile_DA00238_Contig_ST3	Genome assembly	94	94	96856	268045	4163916	0.2839	0	0	0	ST3
GCA_000450625.2_Clostridioides_difficile_P6_Contig_ST3	Genome assembly	167	166	48839	133178	4167114	0.2848	0	0	0	ST3
GCA_000450665.2_Clostridioides_difficile_DA00307_Contig_ST3	Genome assembly	219	219	36095	110297	4147275	0.2843	0	0	0	ST3
GCA_000450925.2_Clostridioides_difficile_P1_Contig_ST3	Genome assembly	160	160	48238	164723	4104507	0.2865	0	0	0	ST3
GCA_000451545.2_Clostridioides_difficile_Y381_Contig_ST3	Genome assembly	60	60	234466	390156	4060729	0.285	0	0	0	ST3
GCA_000452025.2_Clostridioides_difficile_P61_Contig_ST3	Genome assembly	54	54	252783	470719	4032946	0.2857	0	0	0	ST3
GCA_000473705.2_Clostridioides_difficile_F665_Contig_ST3	Genome assembly	49	49	260142	470552	4082320	0.2867	0	0	0	ST3
GCA_001077535.1_Clostridioides_difficile_ATCC_9689_DSM_1296_phiCDIF1296T_Complete_Genome_ST3	Genome assembly	3	3	4109692	4109692	4286205	0.287	0	0	0	ST3
GCA_001971825.1_Clostridioides_difficile_20110869_Contig_ST3	Genome assembly	62	62	139355	569964	4459215	0.2857	0	0	0	ST3
GCA_002073735.1_Clostridioides_difficile_FDAARGOS_267_Complete_Genome_ST3	Genome assembly	3	3	4108953	4108953	4285428	0.287	0	0	0	ST3
GCA_002302285.1_Clostridioides_difficile_6632-NonSp-ST3_Contig_ST3	Genome assembly	88	56	257895	646492	4128812	0.2886	0	0	0	ST3
GCA_002302865.1_Clostridioides_difficile_7479-NonSp-ST3_Contig_ST3	Genome assembly	410	271	36006	154645	4349124	0.2954	0	0	0	ST3
GCA_900008525.1_Clostridioides_difficile_VL_0302_Contig_ST3	Genome assembly	767	354	27170	115156	4504603	0.2904	0	0	0	ST3
GCA_900008555.1_Clostridioides_difficile_VL_0311_Contig_ST3	Genome assembly	388	191	44720	163108	4254985	0.2842	0	0	0	ST3
GCA_900008815.1_Clostridioides_difficile_VL_0444_Contig_ST3	Genome assembly	1405	256	42417	123517	4244666	0.2908	0	0	0	ST3
GCA_900009425.1_Clostridioides_difficile_VL_0242_Contig_ST3	Genome assembly	1127	190	45170	232658	4249807	0.2912	0	0	0	ST3
GCA_900009735.1_Clostridioides_difficile_VL_0411_Contig_ST3	Genome assembly	298	105	114707	258351	4410951	0.2883	0	0	0	ST3
GCA_900010485.1_Clostridioides_difficile_VL_0088_Contig_ST3	Genome assembly	317	109	134792	324949	4456714	0.2881	0	0	0	ST3
GCA_900010995.1_Clostridioides_difficile_VL_0459_Contig_ST3	Genome assembly	344	150	65636	400567	4382319	0.2878	0	0	0	ST3
GCA_900011115.1_Clostridioides_difficile_VL_0231_Contig_ST3	Genome assembly	1277	205	47397	229769	4276398	0.2918	0	0	0	ST3
GCA_900011415.1_Clostridioides_difficile_VL_0060_Contig_ST3	Genome assembly	263	86	198720	422560	4402895	0.2877	0	0	0	ST3
GCA_900011865.1_Clostridioides_difficile_VL_0069_Contig_ST3	Genome assembly	380	157	64752	222145	4390546	0.2882	0	0	0	ST3
GCA_900011975.1_Clostridioides_difficile_VL_0095_Contig_ST3	Genome assembly	261	68	142480	499197	4197961	0.2863	0	0	0	ST3
GCA_900012045.1_Clostridioides_difficile_VL_0113_Contig_ST3	Genome assembly	1059	355	23935	80519	4262647	0.2928	0	0	0	ST3
GCA_900012195.1_Clostridioides_difficile_VL_0147_Contig_ST3	Genome assembly	1332	399	19597	80742	4199328	0.2929	0	0	0	ST3
GCA_900012355.1_Clostridioides_difficile_VL_0352_Contig_ST3	Genome assembly	992	189	41804	179152	4242569	0.2867	0	0	0	ST3
GCA_900012715.1_Clostridioides_difficile_VL_0137_Contig_ST3	Genome assembly	383	115	131256	488906	4508649	0.2883	0	0	0	ST3
GCA_900013905.1_Clostridioides_difficile_VL_0307_Contig_ST3	Genome assembly	255	75	195946	730968	4123594	0.2889	0	0	0	ST3
GCA_900014615.1_Clostridioides_difficile_VL_0404_Contig_ST3	Genome assembly	233	74	219919	455876	4088651	0.2875	0	0	0	ST3
GCA_900014875.1_Clostridioides_difficile_VL_0096_Contig_ST3	Genome assembly	796	141	115166	553165	4172613	0.2908	0	0	0	ST3
GCA_900014885.1_Clostridioides_difficile_VL_0097_Contig_ST3	Genome assembly	433	195	48043	196080	4138754	0.2898	0	0	0	ST3
GCA_900015065.1_Clostridioides_difficile_VL_0373_Contig_ST3	Genome assembly	1302	177	54150	276026	4508108	0.2908	0	0	0	ST3
GCA_900015175.1_Clostridioides_difficile_VL_0422_Contig_ST3	Genome assembly	1232	340	24024	127090	4220034	0.2925	0	0	0	ST3
GCA_900015185.1_Clostridioides_difficile_VL_0458_Contig_ST3	Genome assembly	1211	196	48672	166515	4161286	0.2908	0	0	0	ST3
GCA_900015345.1_Clostridioides_difficile_VL_0250_Contig_ST3	Genome assembly	1320	278	33892	111841	4175576	0.2904	0	0	0	ST3
GCA_900015555.1_Clostridioides_difficile_VL_0001_Contig_ST3	Genome assembly	405	126	81460	312071	4170151	0.2905	0	0	0	ST3
GCA_900074635.1_Clostridioides_difficile_CD105KSE3_Contig_ST3	Genome assembly	189	66	161100	368190	4295063	0.284	0	0	0	ST3
GCA_900074645.1_Clostridioides_difficile_CD105KSE4_Contig_ST3	Genome assembly	440	79	148850	464023	4557402	0.287	0	0	0	ST3
GCA_000451985.1_Clostridioides_difficile_P51_Contig_ST31	Genome assembly	56	56	161476	280792	4256776	0.2886	0	0	0	ST31
GCA_900013795.1_Clostridioides_difficile_VL_0269_Contig_ST32	Genome assembly	1463	215	45074	126987	4267297	0.2891	0	0	0	ST32
GCA_000452085.2_Clostridioides_difficile_P70_Contig_ST34	Genome assembly	48	48	193767	533245	4049371	0.2842	0	0	0	ST34
GCA_000452145.1_Clostridioides_difficile_P73_Contig_ST34	Genome assembly	50	49	193582	532598	4056927	0.2845	0	0	0	ST34
GCA_000452185.2_Clostridioides_difficile_P75_Contig_ST34	Genome assembly	54	54	191288	318251	4050593	0.2842	0	0	0	ST34
GCA_002303265.1_Clostridioides_difficile_6614-AL-ST34_Contig_ST34	Genome assembly	101	39	287727	877387	4177315	0.2858	4	0	0	ST34
GCA_900010935.1_Clostridioides_difficile_VL_0259_Contig_ST34	Genome assembly	376	149	52866	166103	4098661	0.2857	0	0	0	ST34
GCA_900012705.1_Clostridioides_difficile_VL_0033_Contig_ST34	Genome assembly	1142	176	56594	163763	4171269	0.289	0	0	0	ST34
GCA_900013115.1_Clostridioides_difficile_VL_0232_Contig_ST34	Genome assembly	213	69	166166	416580	4123326	0.2847	0	0	0	ST34
GCA_900015055.1_Clostridioides_difficile_VL_0306_Contig_ST34	Genome assembly	943	246	38410	132686	4165132	0.287	0	0	0	ST34
GCA_900015355.1_Clostridioides_difficile_VL_0289_Contig_ST34	Genome assembly	1189	560	12591	58533	4091537	0.2896	0	0	0	ST34
GCA_000451745.2_Clostridioides_difficile_P29_Contig_ST35	Genome assembly	63	63	145474	459701	4156041	0.2883	0	0	0	ST35
GCA_900011695.1_Clostridioides_difficile_VL_0415_Contig_ST35	Genome assembly	356	165	73452	317715	4261962	0.2944	0	0	0	ST35
GCA_002301035.1_Clostridioides_difficile_5487-NonSp-novelST_Contig_ST358	Genome assembly	83	59	229758	522025	4316075	0.2828	0	0	0	ST358
GCA_002302585.1_Clostridioides_difficile_7457-NonSp-novelST_Contig_ST363	Genome assembly	293	248	35299	107469	4183291	0.2872	0	0	0	ST363
GCA_002302845.1_Clostridioides_difficile_7478-NonSp-novelST_Contig_ST364	Genome assembly	408	381	18539	73000	4071635	0.2865	1	0	0	ST364
GCA_002303105.1_Clostridioides_difficile_7497-NonSp-novelST_Contig_ST365	Genome assembly	454	295	46142	219721	4397851	0.2869	0	0	0	ST365
GCA_002301255.1_Clostridioides_difficile_5502-NonSp-novelST_Contig_ST366	Genome assembly	124	66	137049	984798	4076456	0.2839	0	0	0	ST366
GCA_002303415.1_Clostridioides_difficile_6616-NonSp-novelST_Contig_ST367	Genome assembly	282	232	49086	156758	4379705	0.2932	0	0	0	ST367
GCA_002303695.1_Clostridioides_difficile_6629-NonSp-novelST_Contig_ST367	Genome assembly	157	109	190394	461945	4391011	0.2927	0	0	0	ST367
GCA_000449945.2_Clostridioides_difficile_DA00065_Contig_ST37	Genome assembly	149	148	56998	182067	4138699	0.2852	0	0	0	ST37
GCA_000452125.2_Clostridioides_difficile_P71_Contig_ST37	Genome assembly	52	52	163133	417600	4130145	0.2849	0	0	0	ST37
GCA_000452165.2_Clostridioides_difficile_P74_Contig_ST37	Genome assembly	40	40	207015	373458	4160896	0.2846	0	0	0	ST37
GCA_001971875.1_Clostridioides_difficile_20110960_Contig_ST37	Genome assembly	3	3	3709382	3709382	4324360	0.2886	0	0	0	ST37
GCA_001972195.1_Clostridioides_difficile_20121412_Contig_ST37	Genome assembly	4	4	2484966	2484966	4278990	0.2885	0	0	0	ST37
GCA_002302945.1_Clostridioides_difficile_7483-CF-ST37_Contig_ST37	Genome assembly	321	285	27084	91239	4179041	0.2869	0	0	0	ST37
GCA_002303045.1_Clostridioides_difficile_7492-CF-ST37_Contig_ST37	Genome assembly	122	77	154037	305458	4198488	0.2862	0	0	0	ST37
GCA_001757585.1_Clostridioides_difficile_19_3_Contig_ST39	Genome assembly	65	65	178616	438180	4181809	0.2877	0	0	0	ST39
GCA_001757625.1_Clostridioides_difficile_22_1_Contig_ST39	Genome assembly	58	58	196766	471213	4180898	0.2876	0	0	0	ST39
GCA_900010495.1_Clostridioides_difficile_VL_0237_Contig_ST39	Genome assembly	1165	249	36936	150408	4283063	0.2886	0	0	0	ST39
GCA_900012515.1_Clostridioides_difficile_VL_0353_Contig_ST39	Genome assembly	1280	150	67937	336496	4201727	0.2889	0	0	0	ST39
GCA_900008785.1_Clostridioides_difficile_VL_0330_Contig_ST396	Genome assembly	312	72	133667	406308	4169839	0.2833	0	0	0	ST396
GCA_000451945.2_Clostridioides_difficile_P49_Contig_ST4	Genome assembly	46	46	235599	413078	4153887	0.2836	0	0	0	ST4
GCA_000473645.2_Clostridioides_difficile_P53_Contig_ST4	Genome assembly	41	40	236448	412981	4025043	0.2835	0	0	0	ST4
GCA_002301165.1_Clostridioides_difficile_5495-AF-ST41_Contig_ST41	Genome assembly	248	150	97036	288126	4255730	0.2871	0	0	0	ST41
GCA_000448985.2_Clostridioides_difficile_CD41_Contig_ST42	Genome assembly	34	34	247944	458515	4024429	0.2838	0	0	0	ST42
GCA_000449665.2_Clostridioides_difficile_CD201_Contig_ST42	Genome assembly	55	55	131394	263710	4030453	0.2833	0	0	0	ST42
GCA_000449685.2_Clostridioides_difficile_CD206_Contig_ST42	Genome assembly	95	95	73133	193424	4051126	0.284	0	0	0	ST42
GCA_000449725.2_Clostridioides_difficile_CD212_Contig_ST42	Genome assembly	36	36	240914	547239	4003929	0.2833	0	0	0	ST42
GCA_000451245.2_Clostridioides_difficile_CD104_Contig_ST42	Genome assembly	54	54	134678	458990	4061724	0.2841	0	0	0	ST42
GCA_001971945.1_Clostridioides_difficile_20110973_Contig_ST42	Genome assembly	1		4093719	4093719	4093719	0.2865	0	0	0	ST42
GCA_001972085.1_Clostridioides_difficile_20110995_Contig_ST42	Genome assembly	2	2	3015771	3015771	4092490	0.2863	0	0	0	ST42
GCA_002007885.1_Clostridioides_difficile_BR81_Complete_Genome_ST42	Genome assembly	1		4124384	4124384	4124384	0.2871	0	0	0	ST42
GCA_002234355.1_Clostridioides_difficile_DH_NAP11_106_ST_42_Complete_Genome_ST42	Genome assembly	1		4087127	4087127	4087127	0.2862	0	0	0	ST42
GCA_002300835.1_Clostridioides_difficile_5475-DH-ST42_Contig_ST42	Genome assembly	259	114	400467	781555	4186777	0.2879	0	0	0	ST42
GCA_002300925.1_Clostridioides_difficile_5481-DH-ST42_Contig_ST42	Genome assembly	234	124	112509	288088	4089960	0.2855	0	0	0	ST42
GCA_002301025.1_Clostridioides_difficile_5488-DH-ST42_Contig_ST42	Genome assembly	180	88	272230	485852	4107064	0.2853	0	0	0	ST42
GCA_002301125.1_Clostridioides_difficile_5493-DH-ST42_Contig_ST42	Genome assembly	67	40	272411	781311	4051566	0.2839	2	0	0	ST42
GCA_002301245.1_Clostridioides_difficile_5500-DH-ST42_Contig_ST42	Genome assembly	456	246	162940	485655	4321766	0.2937	0	0	0	ST42
GCA_002301305.1_Clostridioides_difficile_5547-DH-ST42_Contig_ST42	Genome assembly	328	119	291296	646980	4198665	0.2872	0	0	0	ST42
GCA_002301335.1_Clostridioides_difficile_5557-DH-ST42_Contig_ST42	Genome assembly	261	160	53351	174332	4153946	0.2851	0	0	0	ST42
GCA_002301375.1_Clostridioides_difficile_5559-DH-ST42_Contig_ST42	Genome assembly	101	38	489995	1248371	4160031	0.2892	2	0	0	ST42
GCA_002301575.1_Clostridioides_difficile_5552-DH-ST42_Contig_ST42	Genome assembly	232	124	140563	485655	4137062	0.2861	0	0	0	ST42
GCA_002301655.1_Clostridioides_difficile_5616-DH-ST42_Contig_ST42	Genome assembly	302	169	47545	134225	4099212	0.2868	0	0	0	ST42
GCA_002301675.1_Clostridioides_difficile_5624-DH-ST42_Contig_ST42	Genome assembly	50	31	485208	762895	4040534	0.2838	0	0	0	ST42
GCA_002301765.1_Clostridioides_difficile_6585-DH-ST42_Contig_ST42	Genome assembly	414	311	25711	83257	4081648	0.2873	0	0	0	ST42
GCA_002301805.1_Clostridioides_difficile_6589-DH-ST42_Contig_ST42	Genome assembly	95	41	214189	479475	4051500	0.2847	3	0	0	ST42
GCA_002302005.1_Clostridioides_difficile_7450-DH-ST42_Contig_ST42	Genome assembly	97	37	485208	781667	4055868	0.2836	0	0	0	ST42
GCA_002302125.1_Clostridioides_difficile_7456-DH-ST42_Contig_ST42	Genome assembly	621	508	19324	90083	4196520	0.2939	0	0	0	ST42
GCA_002302225.1_Clostridioides_difficile_7465-DH-ST42_Contig_ST42	Genome assembly	387	329	22329	99014	4041000	0.2861	0	0	0	ST42
GCA_002302245.1_Clostridioides_difficile_7467-DH-ST42_Contig_ST42	Genome assembly	202	142	89678	327855	4077722	0.2847	3	0	0	ST42
GCA_002302265.1_Clostridioides_difficile_6631-DH-ST42_Contig_ST42	Genome assembly	634	544	12600	58998	4008507	0.287	0	0	0	ST42
GCA_002302305.1_Clostridioides_difficile_6633-DH-ST42_Contig_ST42	Genome assembly	116	60	163675	674278	4069611	0.2848	0	0	0	ST42
GCA_002302465.1_Clostridioides_difficile_6634-DH-ST42_Contig_ST42	Genome assembly	170	133	52681	156786	4036463	0.2845	0	0	0	ST42
GCA_002302745.1_Clostridioides_difficile_7473-DH-ST42_Contig_ST42	Genome assembly	341	294	22913	88622	4032958	0.2851	1	0	0	ST42
GCA_002302985.1_Clostridioides_difficile_7487-DH-ST42_Contig_ST42	Genome assembly	1185	1101	5543	57264	3967225	0.2919	0	0	0	ST42
GCA_002303025.1_Clostridioides_difficile_7491-DH-ST42_Contig_ST42	Genome assembly	526	475	15038	67101	4060983	0.2882	0	0	0	ST42
GCA_002303325.1_Clostridioides_difficile_6607-DH-ST42_Contig_ST42	Genome assembly	78	36	294343	896545	4048406	0.2844	0	0	0	ST42
GCA_002303345.1_Clostridioides_difficile_6609-DH-ST42_Contig_ST42	Genome assembly	72	37	485628	827822	4091641	0.286	0	0	0	ST42
GCA_002303715.1_Clostridioides_difficile_6630-DH-ST42_Contig_ST42	Genome assembly	129	48	193976	1042425	4070488	0.2847	1	0	0	ST42
GCA_002304245.1_Clostridioides_difficile_7466-DH-ST42_Contig_ST42	Genome assembly	304	268	27904	80217	4021750	0.2852	0	0	0	ST42
GCA_002304255.1_Clostridioides_difficile_7462-DH-ST42_Contig_ST42	Genome assembly	137	47	485655	746772	4126257	0.2866	1	0	0	ST42
GCA_900013675.1_Clostridioides_difficile_VL_0247_Contig_ST42	Genome assembly	1497	232	36622	261608	4215310	0.2899	0	0	0	ST42
GCA_000450125.1_Clostridioides_difficile_DA00142_Contig_ST43	Genome assembly	193	183	44831	130873	4183071	0.2829	0	0	0	ST43
GCA_000450345.2_Clostridioides_difficile_DA00195_Contig_ST43	Genome assembly	95	91	95853	243630	4108697	0.2821	0	0	0	ST43
GCA_000450385.2_Clostridioides_difficile_DA00197_Contig_ST43	Genome assembly	18	18	451615	748619	4122528	0.2829	0	0	0	ST43
GCA_000452345.2_Clostridioides_difficile_F601_Contig_ST43	Genome assembly	40	40	214607	404838	4103199	0.2828	0	0	0	ST43
GCA_001971935.1_Clostridioides_difficile_20120014_Contig_ST43	Genome assembly	5	5	4040081	4040081	4224135	0.2851	0	0	0	ST43
GCA_002302115.1_Clostridioides_difficile_7455-A-ST43_Contig_ST43	Genome assembly	120	52	253346	743843	4224258	0.2832	0	0	0	ST43
GCA_002302835.1_Clostridioides_difficile_7477-A-ST43_Contig_ST43	Genome assembly	302	185	75692	178581	4254784	0.2868	0	0	0	ST43
GCA_002303445.1_Clostridioides_difficile_6617-A-ST43_Contig_ST43	Genome assembly	105	44	300768	804100	4221582	0.2841	1	0	0	ST43
GCA_002304265.1_Clostridioides_difficile_7486-A-ST43_Contig_ST43	Genome assembly	82	57	195272	431189	4216230	0.2829	2	0	0	ST43
GCA_900012725.1_Clostridioides_difficile_VL_0138_Contig_ST436	Genome assembly	1346	233	42020	159097	4526895	0.2888	0	0	0	ST436
GCA_000451305.2_Clostridioides_difficile_CD113_Contig_ST45	Genome assembly	127	127	82434	193105	4255649	0.2877	0	0	0	ST45
GCA_900014265.1_Clostridioides_difficile_VL_0133_Contig_ST45	Genome assembly	350	117	105797	259943	4471452	0.2893	0	0	0	ST45
GCA_900164575.1_Clostridioides_difficile_VRECD0009_Contig_ST45	Genome assembly	54	51	473305	1092033	4317067	0.2889	6	0	0	ST45
GCA_001995155.1_Clostridioides_difficile_VPI_10463_Contig_ST46	Genome assembly	2	2	4148159	4148159	4303419	0.2884	0	0	0	ST46
GCA_000449045.2_Clostridioides_difficile_CD44_Contig_ST48	Genome assembly	247	247	31018	105626	3994115	0.2839	0	0	0	ST48
GCA_000449785.2_Clostridioides_difficile_824_Contig_ST48	Genome assembly	122	122	69091	232287	4185643	0.2865	0	0	0	ST48
GCA_900008715.1_Clostridioides_difficile_VL_0080_Contig_ST49	Genome assembly	371	162	55501	180807	4325943	0.2847	0	0	0	ST49
GCA_900014005.1_Clostridioides_difficile_VL_0326_Contig_ST49	Genome assembly	1494	235	48660	267685	4483879	0.2904	0	0	0	ST49
GCA_900164175.1_Clostridioides_difficile_VRECD0131_Contig_ST49	Genome assembly	32	29	555608	676422	4207671	0.2843	9	0	0	ST49
GCA_000949855.1_Clostridioides_difficile_ZJCDC_S82_Scaffold_ST5	Genome assembly	20	20	598695	786732	4225326	0.2907	0	0	0	ST5
GCA_001704795.1_Clostridioides_difficile_103_Contig_ST5	Genome assembly	162	86	131308	412589	4012303	0.2843	0	0	0	ST5
GCA_001704805.1_Clostridioides_difficile_133_Contig_ST5	Genome assembly	150	98	137573	345926	4152605	0.2836	0	0	0	ST5
GCA_000448905.2_Clostridioides_difficile_CD18_Contig_ST53	Genome assembly	44	44	235779	541263	3995800	0.2821	0	0	0	ST53
GCA_000451625.2_Clostridioides_difficile_P9_Contig_ST53	Genome assembly	174	165	46614	153424	4041677	0.2824	0	0	0	ST53
GCA_001971925.1_Clostridioides_difficile_20111163_Contig_ST53	Genome assembly	9	9	1050100	1552316	4163956	0.2849	0	0	0	ST53
GCA_900011435.1_Clostridioides_difficile_VL_0062_Contig_ST53	Genome assembly	865	115	135683	289186	4138932	0.286	0	0	0	ST53
GCA_900015015.1_Clostridioides_difficile_VL_0040_Contig_ST53	Genome assembly	924	241	32523	144291	4151754	0.2865	0	0	0	ST53
GCA_000009205.1_Clostridioides_difficile_630_Complete_Genome_ST54	Genome assembly	2	2	4290252	4290252	4298133	0.2906	0	0	0	ST54
GCA_000448885.2_Clostridioides_difficile_CD13_Contig_ST54	Genome assembly	52	52	157633	329960	4109093	0.2865	0	0	0	ST54
GCA_000932055.2_Clostridioides_difficile_630_Complete_Genome_ST54	Genome assembly	1		4274782	4274782	4274782	0.2904	0	0	0	ST54
GCA_000953275.1_Clostridioides_difficile_630Derm_Complete_Genome_ST54	Genome assembly	1		4293049	4293049	4293049	0.2908	0	0	0	ST54
GCA_002080065.1_Clostridioides_difficile_630_delta_erm_Complete_Genome_ST54	Genome assembly	2	2	4293048	4293048	4300929	0.2908	0	0	0	ST54
GCA_002082945.1_Clostridioides_difficile_FDAARGOS_268_Contig_ST54	Genome assembly	2	2	4323684	4323684	4342634	0.2908	0	0	0	ST54
GCA_002302085.1_Clostridioides_difficile_7454-NonSp-ST54_Contig_ST54	Genome assembly	192	122	94425	225334	4171449	0.2907	0	0	0	ST54
GCA_900008435.1_Clostridioides_difficile_VL_0112_Contig_ST54	Genome assembly	907	505	14740	102299	4309839	0.2937	0	0	0	ST54
GCA_900014675.1_Clostridioides_difficile_VL_0431_Contig_ST54	Genome assembly	288	99	137953	495990	4244634	0.2911	0	0	0	ST54
GCA_900164045.1_Clostridioides_difficile_VRECD0137_Contig_ST54	Genome assembly	50	42	611161	1260184	4336393	0.2902	10	0	0	ST54
GCA_000448725.2_Clostridioides_difficile_CD17_Contig_ST55	Genome assembly	191	190	45815	131956	4158388	0.2826	0	0	0	ST55
GCA_000449085.2_Clostridioides_difficile_CD46_Contig_ST55	Genome assembly	40	39	245948	518027	4018890	0.283	0	0	0	ST55
GCA_000450565.2_Clostridioides_difficile_DA00244_Contig_ST55	Genome assembly	15	15	761856	1922998	4067645	0.2854	4	0	0	ST55
GCA_000451085.2_Clostridioides_difficile_P24_Contig_ST55	Genome assembly	56	56	237406	518328	4254791	0.2826	0	0	0	ST55
GCA_000451105.2_Clostridioides_difficile_P25_Contig_ST55	Genome assembly	22	22	901069	1398489	4276364	0.284	0	0	0	ST55
GCA_000451805.1_Clostridioides_difficile_P32_Contig_ST55	Genome assembly	44	44	237219	514955	4027255	0.2835	0	0	0	ST55
GCA_001971905.1_Clostridioides_difficile_20110961_Contig_ST55	Genome assembly	7	7	2828902	2828902	4103183	0.2868	0	0	0	ST55
GCA_002300955.1_Clostridioides_difficile_5483-L-ST55_Contig_ST55	Genome assembly	86	46	230585	757428	4035276	0.2841	0	0	0	ST55
GCA_002301595.1_Clostridioides_difficile_5553-L-ST55_Contig_ST55	Genome assembly	225	160	57661	244209	4078159	0.2846	0	0	0	ST55
GCA_002304575.1_Clostridioides_difficile_5504-L-ST55_Contig_ST55	Genome assembly	82	39	519873	1100337	4098207	0.2847	0	0	0	ST55
GCA_900009415.1_Clostridioides_difficile_VL_0103_Contig_ST55	Genome assembly	295	96	103240	368396	4120635	0.284	0	0	0	ST55
GCA_000448865.2_Clostridioides_difficile_CD9_Contig_ST58	Genome assembly	87	85	685892	935931	4310458	0.2894	5	0	0	ST58
GCA_000450965.2_Clostridioides_difficile_P5_Contig_ST58	Genome assembly	181	180	44667	142666	4048946	0.2839	0	0	0	ST58
GCA_000451665.2_Clostridioides_difficile_P13_Contig_ST58	Genome assembly	42	42	217449	414890	4021448	0.2843	0	0	0	ST58
GCA_000451905.2_Clostridioides_difficile_P46_Contig_ST58	Genome assembly	60	60	196884	382061	4125436	0.2846	0	0	0	ST58
GCA_000451925.2_Clostridioides_difficile_P48_Contig_ST58	Genome assembly	68	68	157205	536187	4172979	0.2836	0	0	0	ST58
GCA_000473625.2_Clostridioides_difficile_P37_Contig_ST58	Genome assembly	62	62	180173	513664	4080614	0.2848	0	0	0	ST58
GCA_000473685.2_Clostridioides_difficile_P68_Contig_ST58	Genome assembly	49	47	246498	414106	4056190	0.2844	0	0	0	ST58
GCA_002301835.1_Clostridioides_difficile_6595-AL-ST58_Contig_ST58	Genome assembly	113	75	177711	321533	4172948	0.2854	0	0	0	ST58
GCA_002301895.1_Clostridioides_difficile_6597-AL-ST58_Contig_ST58	Genome assembly	917	859	7416	45494	4050337	0.289	1	0	0	ST58
GCA_002301975.1_Clostridioides_difficile_6637-AL-ST58_Contig_ST58	Genome assembly	121	86	173928	463825	4205094	0.284	0	0	0	ST58
GCA_002302795.1_Clostridioides_difficile_7474-AL-ST58_Contig_ST58	Genome assembly	132	89	155337	414634	4209033	0.2844	0	0	0	ST58
GCA_002303655.1_Clostridioides_difficile_6627-AL-ST58_Contig_ST58	Genome assembly	151	78	177862	547513	4182475	0.286	0	0	0	ST58
GCA_002303675.1_Clostridioides_difficile_6628-AL-ST58_Contig_ST58	Genome assembly	162	82	210093	546817	4195997	0.2857	0	0	0	ST58
GCA_900010025.1_Clostridioides_difficile_VL_0110_Contig_ST58	Genome assembly	1238	226	50018	166365	4232955	0.2889	0	0	0	ST58
GCA_900013205.1_Clostridioides_difficile_VL_0072_Contig_ST58	Genome assembly	1318	252	32693	219804	4176291	0.2886	0	0	0	ST58
GCA_900014115.1_Clostridioides_difficile_VL_0347_Contig_ST58	Genome assembly	1304	200	55622	258663	4220613	0.2875	0	0	0	ST58
GCA_900014135.1_Clostridioides_difficile_VL_0037_Contig_ST58	Genome assembly	423	269	30841	105080	4110486	0.2849	0	0	0	ST58
GCA_002302905.1_Clostridioides_difficile_7481-NonSp-ST59_Contig_ST59	Genome assembly	388	334	25537	75831	4201497	0.2879	0	0	0	ST59
GCA_002302185.1_Clostridioides_difficile_7463-E-ST6_Contig_ST6	Genome assembly	166	124	93330	340292	4403762	0.2867	0	0	0	ST6
GCA_002352515.1_Clostridioides_difficile_RC10_Contig_ST6	Genome assembly	196	177	108270	338902	4387948	0.285	4	0	4	ST6
GCA_000449005.2_Clostridioides_difficile_CD42_Contig_ST63	Genome assembly	245	245	30941	93084	4029065	0.2851	0	0	0	ST63
GCA_000449445.2_Clostridioides_difficile_CD165_Contig_ST63	Genome assembly	99	99	96117	216952	4086646	0.286	0	0	0	ST63
GCA_000449565.2_Clostridioides_difficile_DA00261_Contig_ST63	Genome assembly	15	15	859712	1244651	4144050	0.2867	0	0	0	ST63
GCA_000449625.2_Clostridioides_difficile_DA00275_Contig_ST63	Genome assembly	86	85	107348	184156	4080079	0.2858	0	0	0	ST63
GCA_000449905.2_Clostridioides_difficile_DA00044_Contig_ST63	Genome assembly	143	143	57824	176684	4059685	0.2846	0	0	0	ST63
GCA_000450285.2_Clostridioides_difficile_DA00183_Contig_ST63	Genome assembly	114	114	67760	239330	4071468	0.2861	0	0	0	ST63
GCA_000450405.2_Clostridioides_difficile_DA00203_Contig_ST63	Genome assembly	14	14	765503	1185753	4153521	0.288	0	0	0	ST63
GCA_000450745.2_Clostridioides_difficile_F249_Contig_ST63	Genome assembly	111	111	65775	160121	4206521	0.285	0	0	0	ST63
GCA_000450945.2_Clostridioides_difficile_P2_Contig_ST63	Genome assembly	202	202	35786	131920	4195901	0.2842	0	0	0	ST63
GCA_000451425.2_Clostridioides_difficile_Y231_Contig_ST63	Genome assembly	42	42	197543	515918	4093690	0.2857	0	0	0	ST63
GCA_000451525.2_Clostridioides_difficile_Y358_Contig_ST63	Genome assembly	87	87	90749	318325	4152679	0.2876	0	0	0	ST63
GCA_000451705.1_Clostridioides_difficile_P19_Contig_ST63	Genome assembly	65	65	212811	515952	4184936	0.2874	0	0	0	ST63
GCA_900007585.1_Clostridioides_difficile_VL_0004_Contig_ST63	Genome assembly	1252	210	54139	130937	4242606	0.2893	0	0	0	ST63
GCA_000450785.2_Clostridioides_difficile_F314_Contig_ST67	Genome assembly	54	54	185953	463465	4056563	0.2837	0	0	0	ST67
GCA_001971865.1_Clostridioides_difficile_20100502_Contig_ST67	Genome assembly	4	4	3853484	3853484	4201508	0.2869	0	0	0	ST67
GCA_002301465.1_Clostridioides_difficile_5544-AH-ST67_Contig_ST67	Genome assembly	174	139	57424	137359	4143658	0.2845	0	0	0	ST67
GCA_002301525.1_Clostridioides_difficile_5550-AH-ST67_Contig_ST67	Genome assembly	79	58	169758	379731	4099540	0.2842	0	0	0	ST67
GCA_002301715.1_Clostridioides_difficile_6583-AH-ST67_Contig_ST67	Genome assembly	307	255	36226	124709	4150438	0.2854	0	0	0	ST67
GCA_000531385.1_Clostridioides_difficile_E16_Scaffold_ST7	Genome assembly	111	111	132754	478800	4252783	0.2871	10	0	0	ST7
GCA_000531715.1_Clostridioides_difficile_T61_Scaffold_ST7	Genome assembly	82	82	141610	478787	4071443	0.2874	0	0	0	ST7
GCA_900164095.1_Clostridioides_difficile_VRECD0165_Contig_ST7	Genome assembly	44	37	422442	1331600	4248821	0.2877	6	0	0	ST7
GCA_000449145.2_Clostridioides_difficile_CD51_Contig_ST8	Genome assembly	146	146	53397	215308	4011592	0.2817	0	0	0	ST8
GCA_000449345.2_Clostridioides_difficile_CD133_Contig_ST8	Genome assembly	123	123	61825	195414	4107124	0.2817	0	0	0	ST8
GCA_000449505.2_Clostridioides_difficile_CD170_Contig_ST8	Genome assembly	207	207	34371	107318	4167756	0.2816	0	0	0	ST8
GCA_000449765.2_Clostridioides_difficile_655_Contig_ST8	Genome assembly	207	207	36927	95093	4081576	0.2828	0	0	0	ST8
GCA_000450065.2_Clostridioides_difficile_DA00132_Contig_ST8	Genome assembly	78	78	99187	242579	4070905	0.2819	0	0	0	ST8
GCA_000450465.2_Clostridioides_difficile_DA00212_Contig_ST8	Genome assembly	89	87	96596	238111	4149547	0.2816	0	0	0	ST8
GCA_000450605.2_Clostridioides_difficile_DA00246_Contig_ST8	Genome assembly	57	57	133039	453508	4093262	0.2827	0	0	0	ST8
GCA_000450825.2_Clostridioides_difficile_Y10_Contig_ST8	Genome assembly	37	37	237821	480313	4062917	0.282	0	0	0	ST8
GCA_000450865.2_Clostridioides_difficile_Y41_Contig_ST8	Genome assembly	39	39	233399	543470	4074379	0.2819	0	0	0	ST8
GCA_000450885.2_Clostridioides_difficile_Y155_Contig_ST8	Genome assembly	232	231	33044	109110	3980239	0.2825	0	0	0	ST8
GCA_000451405.2_Clostridioides_difficile_Y312_Contig_ST8	Genome assembly	160	160	47451	180350	4054373	0.2824	0	0	0	ST8
GCA_000451445.2_Clostridioides_difficile_Y171_Contig_ST8	Genome assembly	286	286	23283	83351	3961225	0.283	0	0	0	ST8
GCA_000451685.2_Clostridioides_difficile_P15_Contig_ST8	Genome assembly	36	36	234752	471623	4054676	0.2833	0	0	0	ST8
GCA_000451845.2_Clostridioides_difficile_P36_Contig_ST8	Genome assembly	40	40	233587	330903	4048210	0.2821	0	0	0	ST8
GCA_001972005.1_Clostridioides_difficile_20120020_Contig_ST8	Genome assembly	3	3	4055398	4055398	4156404	0.2852	0	0	0	ST8
GCA_002301785.1_Clostridioides_difficile_6588-G-ST8_Contig_ST8	Genome assembly	170	131	66395	151104	4065938	0.2838	0	0	0	ST8
GCA_002301845.1_Clostridioides_difficile_6594-G-ST8_Contig_ST8	Genome assembly	563	523	12435	59875	4007651	0.2852	0	0	0	ST8
GCA_002302165.1_Clostridioides_difficile_7459-G-ST8_Contig_ST8	Genome assembly	72	49	169765	449550	4079871	0.2835	0	0	0	ST8
GCA_900007665.1_Clostridioides_difficile_VL_0272_Contig_ST8	Genome assembly	928	224	43486	146492	4094373	0.2867	0	0	0	ST8
GCA_900007675.1_Clostridioides_difficile_VL_0273_Contig_ST8	Genome assembly	1262	247	42472	136377	4134248	0.2867	0	0	0	ST8
GCA_900008495.1_Clostridioides_difficile_VL_0297_Contig_ST8	Genome assembly	227	66	135636	521078	4092228	0.2827	0	0	0	ST8
GCA_900010125.1_Clostridioides_difficile_VL_0163_Contig_ST8	Genome assembly	535	280	27066	106597	4157845	0.2842	0	0	0	ST8
GCA_900010135.1_Clostridioides_difficile_VL_0298_Contig_ST8	Genome assembly	1194	175	61209	257702	4391704	0.2864	0	0	0	ST8
GCA_900012735.1_Clostridioides_difficile_VL_0178_Contig_ST8	Genome assembly	470	243	37281	97498	4342976	0.2839	0	0	0	ST8
GCA_900013615.1_Clostridioides_difficile_VL_0235_Contig_ST8	Genome assembly	1474	594	11072	48802	4197421	0.2878	0	0	0	ST8
GCA_900013915.1_Clostridioides_difficile_VL_0308_Contig_ST8	Genome assembly	280	142	71640	244643	4239945	0.2824	0	0	0	ST8
GCA_900014065.1_Clostridioides_difficile_VL_0339_Contig_ST8	Genome assembly	971	646	10164	59741	4055132	0.2863	0	0	0	ST8
GCA_900014795.1_Clostridioides_difficile_VL_0465_Contig_ST8	Genome assembly	304	133	73676	207539	4222858	0.2837	0	0	0	ST8
GCA_900015535.1_Clostridioides_difficile_VL_0010_Contig_ST8	Genome assembly	1497	240	44836	159224	4162800	0.287	0	0	0	ST8
GCA_900015565.1_Clostridioides_difficile_VL_0023_Contig_ST8	Genome assembly	959	169	61824	256956	4221983	0.2859	0	0	0	ST8
GCA_900165055.1_Clostridioides_difficile_VRECD0115_Contig_ST8	Genome assembly	28	25	546233	1223067	4096161	0.2832	4	0	0	ST8
GCA_000450365.2_Clostridioides_difficile_DA00196_Contig_ST83	Genome assembly	22	22	623272	758411	4254880	0.288	1	0	0	ST83
GCA_000451385.2_Clostridioides_difficile_Y270_Contig_ST83	Genome assembly	53	53	217760	380983	4149527	0.287	0	0	0	ST83
GCA_000451505.2_Clostridioides_difficile_Y343_Contig_ST83	Genome assembly	49	49	231487	511554	4037570	0.2833	0	0	0	ST83
GCA_000451965.2_Clostridioides_difficile_P50_Contig_ST83	Genome assembly	29	29	486408	672161	4395649	0.2864	1	0	0	ST83
GCA_900008365.1_Clostridioides_difficile_VL_0067_Contig_ST83	Genome assembly	1455	719	10811	106129	4483982	0.291	0	0	0	ST83
GCA_900011645.1_Clostridioides_difficile_VL_0150_Contig_ST83	Genome assembly	1133	328	27976	138818	4482144	0.2899	0	0	0	ST83
GCA_900012935.1_Clostridioides_difficile_VL_0210_Contig_ST83	Genome assembly	1438	251	59444	250646	4448346	0.2901	0	0	0	ST83
GCA_900014205.1_Clostridioides_difficile_VL_0452_Contig_ST83	Genome assembly	293	115	135522	344720	4408841	0.2876	0	0	0	ST83
GCA_900014445.1_Clostridioides_difficile_VL_0364_Contig_ST83	Genome assembly	1054	230	46131	300646	4526937	0.2893	0	0	0	ST83
GCA_900014525.1_Clostridioides_difficile_VL_0384_Contig_ST83	Genome assembly	472	106	104073	490550	4245001	0.2877	0	0	0	ST83
GCA_000210415.1_Clostridioides_difficile_CF5_Complete_Genome_ST86	Genome assembly	1		4159517	4159517	4159517	0.2854	0	0	0	ST86
GCA_002301405.1_Clostridioides_difficile_5537-D-ST9_Contig_ST9	Genome assembly	77	48	203831	508541	4240222	0.2871	0	0	0	ST9
GCA_900013055.1_Clostridioides_difficile_VL_0224_Contig_ST9	Genome assembly	906	137	102809	296126	4271509	0.2889	0	0	0	ST9
GCA_900015605.1_Clostridioides_difficile_VL_0154_Contig_ST9	Genome assembly	632	273	30131	107638	4226040	0.2892	0	0	0	ST9
GCA_002302755.1_Clostridioides_difficile_7468-NonSp-ST97_Contig_ST97	Genome assembly	158	119	89844	332831	4418761	0.2829	0	0	0	ST97
GCA_000448785.2_Clostridioides_difficile_CD22_Contig_STX	Genome assembly	167	167	46528	158455	4029173	0.2818	0	0	0	STX
GCA_000448825.2_Clostridioides_difficile_CD3_Contig_STX	Genome assembly	344	335	22661	67591	4072944	0.2825	0	0	0	STX
GCA_000448845.2_Clostridioides_difficile_CD8_Contig_STX	Genome assembly	280	280	28010	91817	4044267	0.2838	0	0	0	STX
GCA_000448945.2_Clostridioides_difficile_CD39_Contig_STX	Genome assembly	172	172	42156	156284	3989372	0.2826	0	0	0	STX
GCA_000449065.2_Clostridioides_difficile_CD45_Contig_STX	Genome assembly	176	175	54395	225563	4367906	0.2836	0	0	0	STX
GCA_000449165.2_Clostridioides_difficile_CD68_Contig_STX	Genome assembly	141	141	53580	271698	3975975	0.2817	0	0	0	STX
GCA_000449285.1_Clostridioides_difficile_CD129_Contig_STX	Genome assembly	963	917	6946	27138	3980806	0.2857	0	0	0	STX
GCA_000449325.2_Clostridioides_difficile_CD132_Contig_STX	Genome assembly	196	196	34865	135392	3956938	0.2831	0	0	0	STX
GCA_000449405.2_Clostridioides_difficile_CD159_Contig_STX	Genome assembly	290	289	24265	76940	3986487	0.2841	0	0	0	STX
GCA_000449525.2_Clostridioides_difficile_CD175_Contig_STX	Genome assembly	687	662	9828	59385	3986398	0.286	0	0	0	STX
GCA_000449605.2_Clostridioides_difficile_CD196_Contig_STX	Genome assembly	999	934	6234	30645	3600277	0.2854	0	0	0	STX
GCA_000449645.2_Clostridioides_difficile_CD200_Contig_STX	Genome assembly	218	208	41800	129363	4296879	0.2823	0	0	0	STX
GCA_000449805.2_Clostridioides_difficile_840_Contig_STX	Genome assembly	183	183	42377	112564	4052127	0.2829	0	0	0	STX
GCA_000449825.2_Clostridioides_difficile_842_Contig_STX	Genome assembly	162	162	46936	131725	4005916	0.2821	0	0	0	STX
GCA_000449845.1_Clostridioides_difficile_6041_Contig_STX	Genome assembly	174	167	44110	133059	4026569	0.2825	0	0	0	STX
GCA_000449865.2_Clostridioides_difficile_6042_Contig_STX	Genome assembly	314	311	24692	96401	3945922	0.282	0	0	0	STX
GCA_000449885.2_Clostridioides_difficile_6057_Contig_STX	Genome assembly	296	296	21377	89606	3986776	0.2822	0	0	0	STX
GCA_000449985.2_Clostridioides_difficile_DA00126_Contig_STX	Genome assembly	91	89	115337	290756	4167768	0.2823	0	0	0	STX
GCA_000450025.2_Clostridioides_difficile_DA00129_Contig_STX	Genome assembly	73	73	107146	361071	4193537	0.2826	0	0	0	STX
GCA_000450145.2_Clostridioides_difficile_DA00145_Contig_STX	Genome assembly	132	132	55379	138400	4051066	0.2825	0	0	0	STX
GCA_000450165.2_Clostridioides_difficile_DA00149_Contig_STX	Genome assembly	95	95	58115	273551	3714301	0.2818	0	0	0	STX
GCA_000450185.2_Clostridioides_difficile_DA00154_Contig_STX	Genome assembly	102	97	109889	277718	4126663	0.2865	0	0	0	STX
GCA_000450205.2_Clostridioides_difficile_DA00160_Contig_STX	Genome assembly	98	93	113054	321402	4134851	0.2865	0	0	0	STX
GCA_000450225.2_Clostridioides_difficile_DA00165_Contig_STX	Genome assembly	14	14	939256	1422160	4158062	0.2848	0	0	0	STX
GCA_000450305.2_Clostridioides_difficile_DA00191_Contig_STX	Genome assembly	87	87	85043	299692	4235553	0.2819	0	0	0	STX
GCA_000450325.2_Clostridioides_difficile_DA00193_Contig_STX	Genome assembly	60	60	141166	485965	3969329	0.2835	0	0	0	STX
GCA_000450425.2_Clostridioides_difficile_DA00210_Contig_STX	Genome assembly	118	114	84483	318593	4250589	0.2831	0	0	0	STX
GCA_000450505.2_Clostridioides_difficile_DA00216_Contig_STX	Genome assembly	475	462	15721	64276	4058807	0.2866	0	0	0	STX
GCA_000450685.2_Clostridioides_difficile_DA00310_Contig_STX	Genome assembly	615	599	10621	58126	3909936	0.2856	0	0	0	STX
GCA_000450765.2_Clostridioides_difficile_F253_Contig_STX	Genome assembly	437	428	18456	61841	4056592	0.2859	0	0	0	STX
GCA_000451165.2_Clostridioides_difficile_Y202_Contig_STX	Genome assembly	340	333	19572	70290	3902600	0.2823	0	0	0	STX
GCA_000451185.2_Clostridioides_difficile_Y266_Contig_STX	Genome assembly	190	190	40825	142275	4122918	0.2874	0	0	0	STX
GCA_000451225.1_Clostridioides_difficile_CD92_Contig_STX	Genome assembly	414	396	18366	62883	4043130	0.2837	0	0	0	STX
GCA_000451265.2_Clostridioides_difficile_Y215_Contig_STX	Genome assembly	95	95	75574	206616	4068572	0.2816	0	0	0	STX
GCA_000451325.2_Clostridioides_difficile_CD127_Contig_STX	Genome assembly	985	937	6247	49296	3727657	0.2866	0	0	0	STX
GCA_000451345.1_Clostridioides_difficile_DA00305_Contig_STX	Genome assembly	674	652	9753	62835	3988162	0.2842	0	0	0	STX
GCA_000451365.2_Clostridioides_difficile_Y165_Contig_STX	Genome assembly	367	356	24471	138986	4263767	0.2843	0	0	0	STX
GCA_000451485.2_Clostridioides_difficile_Y307_Contig_STX	Genome assembly	387	376	17178	81117	3926464	0.2823	0	0	0	STX
GCA_000451605.1_Clostridioides_difficile_P7_Contig_STX	Genome assembly	243	230	35719	117262	4049588	0.2843	0	0	0	STX
GCA_000451645.2_Clostridioides_difficile_P11_Contig_STX	Genome assembly	266	262	29531	80156	4056217	0.2831	0	0	0	STX
GCA_000451725.2_Clostridioides_difficile_P20_Contig_STX	Genome assembly	63	63	199123	491508	4176653	0.2868	0	0	0	STX
GCA_001010825.1_Clostridioides_difficile_BJ08_Complete_Genome_STX	Genome assembly	1		4133893	4133893	4133893	0.2873	0	0	0	STX
GCA_001447175.1_Clostridioides_difficile_Z31_Complete_Genome_STX	Genome assembly	1		4298263	4298263	4298263	0.2922	0	0	0	STX
GCA_001896475.1_Clostridioides_difficile_NT1619_Contig_STX	Genome assembly	801	536	12222	52958	4016192	0.2854	0	0	0	STX
GCA_001984465.1_Clostridioides_difficile_LEM1_Complete_Genome_STX	Genome assembly	1		4191506	4191506	4191506	0.2877	0	0	0	STX
GCA_002082985.1_Clostridioides_difficile_FDAARGOS_269_Contig_STX	Genome assembly	3	3	4136911	4136911	4263853	0.2862	0	0	0	STX
GCA_002303075.1_Clostridioides_difficile_7496-D-ST9_Contig_STX	Genome assembly	447	408	17160	68848	4213699	0.2894	2	0	0	STX
GCA_900007705.1_Clostridioides_difficile_VL_0368_Contig_STX	Genome assembly	1436	218	48960	193619	4584485	0.2941	0	0	0	STX
GCA_900010415.1_Clostridioides_difficile_VL_0464_Contig_STX	Genome assembly	924	563	12668	64025	4169931	0.2906	0	0	0	STX
GCA_900011895.1_Clostridioides_difficile_VL_0079_Contig_STX	Genome assembly	271	110	86365	260632	4141352	0.2843	0	0	0	STX
GCA_900013065.1_Clostridioides_difficile_VL_0226_Contig_STX	Genome assembly	1100	135	95222	474441	4273429	0.2904	0	0	0	STX
GCA_900013355.1_Clostridioides_difficile_VL_0167_Contig_STX	Genome assembly	1376	427	19431	94556	4250104	0.2932	0	0	0	STX
GCA_900014095.1_Clostridioides_difficile_VL_0343_Contig_STX	Genome assembly	403	115	79426	267065	4173682	0.2863	0	0	0	STX
GCA_900014255.1_Clostridioides_difficile_VL_0134_Contig_STX	Genome assembly	1496	251	33337	147747	4225162	0.2889	0	0	0	STX
GCA_900014425.1_Clostridioides_difficile_VL_0356_Contig_STX	Genome assembly	402	153	55936	221285	4164952	0.283	0	0	0	STX
GCA_900073085.1_Clostridioides_difficile_CD105KSE1_Contig_STX	Genome assembly	624	233	60588	140214	4423918	0.2945	0	0	0	STX
GCA_900073115.1_Clostridioides_difficile_CD105KSE6_Contig_STX	Genome assembly	124	49	190962	599188	4262632	0.286	0	0	0	STX
GCA_900073255.1_Clostridioides_difficile_CD105KSE2_Contig_STX	Genome assembly	122	52	180336	469783	4228132	0.2871	0	0	0	STX
GCA_900074815.1_Clostridioides_difficile_CD105KSO10_Contig_STX	Genome assembly	424	111	79714	201841	4340659	0.2912	0	0	0	STX
ERR024642_ST1	Sequence data + in-house assembly	113	68	144880	333932	4108394	0.2848	0	0	0	ST1
ERR024643_ST1	Sequence data + in-house assembly	220	64	141629	407960	4116779	0.2848	0	0	0	ST1
ERR024646_ST1	Sequence data + in-house assembly	78	55	218656	426220	4110524	0.2847	0	0	0	ST1
ERR024647_ST1	Sequence data + in-house assembly	72	51	230892	456870	4142484	0.286	0	0	0	ST1
ERR024648_ST1	Sequence data + in-house assembly	75	50	219468	425319	4111401	0.2847	0	0	0	ST1
ERR024649_ST1	Sequence data + in-house assembly	75	54	219273	456843	4143838	0.286	0	0	0	ST1
ERR024650_ST1	Sequence data + in-house assembly	78	52	219378	456299	4141194	0.286	0	0	0	ST1
ERR024651_ST1	Sequence data + in-house assembly	76	56	219219	456513	4141594	0.286	0	0	0	ST1
ERR024652_ST1	Sequence data + in-house assembly	147	111	72771	220814	4112979	0.2848	0	0	0	ST1
ERR024653_ST1	Sequence data + in-house assembly	81	63	129115	323398	4106937	0.2847	0	0	0	ST1
ERR024655_ST1	Sequence data + in-house assembly	302	76	134532	276753	4113466	0.285	0	0	0	ST1
ERR024656_ST1	Sequence data + in-house assembly	278	65	141364	407568	4110589	0.2848	0	0	0	ST1
ERR024657_ST1	Sequence data + in-house assembly	67	49	219219	424853	4111648	0.2847	0	0	0	ST1
ERR024659_ST1	Sequence data + in-house assembly	224	66	134532	309962	4115773	0.2848	10	0	0	ST1
ERR024660_ST1	Sequence data + in-house assembly	83	57	172191	425384	4111227	0.2847	0	0	0	ST1
ERR024661_ST1	Sequence data + in-house assembly	77	51	219509	456211	4140912	0.2861	0	0	0	ST1
ERR024662_ST1	Sequence data + in-house assembly	113	53	218801	425275	4126888	0.2853	0	0	0	ST1
ERR024663_ST1	Sequence data + in-house assembly	88	51	166650	353859	4105297	0.2846	0	0	0	ST1
ERR024664_ST1	Sequence data + in-house assembly	99	72	109144	318607	4105768	0.2848	0	0	0	ST1
ERR024665_ST1	Sequence data + in-house assembly	287	56	141496	407246	4112988	0.2849	6	0	0	ST1
ERR024666_ST1	Sequence data + in-house assembly	112	87	96616	318495	4106916	0.2848	0	0	0	ST1
ERR024996_ST1	Sequence data + in-house assembly	123	106	83906	259599	4073514	0.2838	0	0	0	ST1
ERR024997_ST1	Sequence data + in-house assembly	125	109	80986	259611	4074853	0.2839	0	0	0	ST1
ERR024998_ST1	Sequence data + in-house assembly	120	106	85856	259645	4074303	0.2839	0	0	0	ST1
ERR024999_ST1	Sequence data + in-house assembly	155	131	79323	236564	4075216	0.284	0	0	0	ST1
ERR025000_ST1	Sequence data + in-house assembly	125	110	80761	259599	4074542	0.2839	0	0	0	ST1
ERR025001_ST1	Sequence data + in-house assembly	125	108	80885	259645	4075708	0.2839	0	0	0	ST1
ERR025002_ST1	Sequence data + in-house assembly	129	110	85639	259645	4074977	0.2839	0	0	0	ST1
ERR025003_ST1	Sequence data + in-house assembly	121	108	79329	210858	4073388	0.2839	0	0	0	ST1
ERR025004_ST1	Sequence data + in-house assembly	158	139	60468	209436	4073235	0.284	0	0	0	ST1
ERR025005_ST1	Sequence data + in-house assembly	201	178	47774	122019	4071734	0.2841	0	0	0	ST1
ERR025006_ST1	Sequence data + in-house assembly	147	136	56403	178657	4077220	0.284	1	0	0	ST1
ERR025007_ST1	Sequence data + in-house assembly	121	106	80795	259645	4074791	0.2839	0	0	0	ST1
ERR025010_ST1	Sequence data + in-house assembly	123	103	85649	259565	4073911	0.2839	0	0	0	ST1
ERR025011_ST1	Sequence data + in-house assembly	120	101	80902	236458	4075197	0.2839	0	0	0	ST1
ERR025012_ST1	Sequence data + in-house assembly	226	199	38013	121851	4066020	0.2841	0	0	0	ST1
ERR025014_ST1	Sequence data + in-house assembly	125	103	86300	236514	4075446	0.284	0	0	0	ST1
ERR025015_ST1	Sequence data + in-house assembly	126	109	80902	259645	4074842	0.2839	0	0	0	ST1
ERR025016_ST1	Sequence data + in-house assembly	123	108	85761	259645	4079043	0.2839	0	0	0	ST1
ERR025017_ST1	Sequence data + in-house assembly	201	182	46786	122015	4072059	0.2841	1	0	0	ST1
ERR025018_ST1	Sequence data + in-house assembly	199	180	46168	122013	4072796	0.2841	0	0	0	ST1
ERR025019_ST1	Sequence data + in-house assembly	149	126	61045	209436	4074810	0.2839	0	0	0	ST1
ERR025020_ST1	Sequence data + in-house assembly	124	107	80855	259645	4075100	0.2838	0	0	0	ST1
ERR025023_ST1	Sequence data + in-house assembly	130	110	85639	259611	4072770	0.2839	0	0	0	ST1
ERR025024_ST1	Sequence data + in-house assembly	125	109	80791	259565	4074178	0.2839	0	0	0	ST1
ERR025025_ST1	Sequence data + in-house assembly	200	182	45521	174024	4068214	0.2841	0	0	0	ST1
ERR025026_ST1	Sequence data + in-house assembly	122	108	81415	259645	4074431	0.2839	0	0	0	ST1
ERR025027_ST1	Sequence data + in-house assembly	125	113	89555	259645	4072378	0.2839	0	0	0	ST1
ERR025028_ST1	Sequence data + in-house assembly	119	104	80872	259595	4074529	0.2839	0	0	0	ST1
ERR025029_ST1	Sequence data + in-house assembly	126	113	81415	259645	4073344	0.2839	0	0	0	ST1
ERR025030_ST1	Sequence data + in-house assembly	208	185	46219	126393	4072770	0.284	0	0	0	ST1
ERR025031_ST1	Sequence data + in-house assembly	245	227	34602	177601	4065613	0.2842	0	0	0	ST1
ERR025032_ST1	Sequence data + in-house assembly	173	160	46240	177585	4075232	0.284	1	0	0	ST1
ERR025033_ST1	Sequence data + in-house assembly	126	108	80795	259611	4073962	0.2839	0	0	0	ST1
ERR025035_ST1	Sequence data + in-house assembly	132	108	80906	236550	4072192	0.2839	0	0	0	ST1
ERR025036_ST1	Sequence data + in-house assembly	126	105	85556	259565	4074744	0.2839	0	0	0	ST1
ERR025038_ST1	Sequence data + in-house assembly	131	111	80795	259611	4078024	0.284	0	0	0	ST1
ERR025039_ST1	Sequence data + in-house assembly	252	66	141774	408290	4114090	0.2843	0	0	0	ST1
ERR025040_ST1	Sequence data + in-house assembly	124	108	82738	259645	4074123	0.2839	0	0	0	ST1
ERR025041_ST1	Sequence data + in-house assembly	132	113	80902	208843	4074862	0.2839	0	0	0	ST1
ERR025042_ST1	Sequence data + in-house assembly	128	112	80035	259639	4073713	0.2839	0	0	0	ST1
ERR025043_ST1	Sequence data + in-house assembly	160	147	54742	177711	4073678	0.284	0	0	0	ST1
ERR025044_ST1	Sequence data + in-house assembly	222	195	45528	129568	4071043	0.2841	0	0	0	ST1
ERR025045_ST1	Sequence data + in-house assembly	150	131	67348	236564	4075762	0.284	1	0	0	ST1
ERR025048_ST1	Sequence data + in-house assembly	121	108	80885	259611	4075875	0.2839	0	0	0	ST1
ERR025049_ST1	Sequence data + in-house assembly	121	104	85515	259595	4073930	0.284	0	0	0	ST1
ERR025050_ST1	Sequence data + in-house assembly	122	107	85473	259645	4073545	0.2839	0	0	0	ST1
ERR025051_ST1	Sequence data + in-house assembly	146	128	62370	207963	4076471	0.284	0	0	0	ST1
ERR025052_ST1	Sequence data + in-house assembly	121	108	85556	259611	4073081	0.2839	0	0	0	ST1
ERR025053_ST1	Sequence data + in-house assembly	135	116	79323	208845	4073391	0.2839	0	0	0	ST1
ERR025054_ST1	Sequence data + in-house assembly	127	108	80713	236530	4074973	0.2839	0	0	0	ST1
ERR025055_ST1	Sequence data + in-house assembly	126	108	80951	259595	4075174	0.2839	0	0	0	ST1
ERR025056_ST1	Sequence data + in-house assembly	179	160	50565	177697	4073135	0.2841	0	0	0	ST1
ERR025058_ST1	Sequence data + in-house assembly	158	141	61074	177701	4074488	0.2839	0	0	0	ST1
ERR025059_ST1	Sequence data + in-house assembly	132	113	79323	236442	4073393	0.2839	0	0	0	ST1
ERR025061_ST1	Sequence data + in-house assembly	131	109	85855	259645	4075612	0.2839	0	0	0	ST1
ERR025062_ST1	Sequence data + in-house assembly	124	104	82288	259645	4073955	0.2839	0	0	0	ST1
ERR025063_ST1	Sequence data + in-house assembly	126	107	80900	259809	4077523	0.2839	0	0	0	ST1
ERR025064_ST1	Sequence data + in-house assembly	133	115	68370	209435	4077344	0.2839	0	0	0	ST1
ERR025065_ST1	Sequence data + in-house assembly	120	107	80795	259645	4076729	0.2839	0	0	0	ST1
ERR025066_ST1	Sequence data + in-house assembly	120	104	80872	259645	4073080	0.2839	0	0	0	ST1
ERR025069_ST1	Sequence data + in-house assembly	160	142	56007	177695	4073792	0.2839	0	0	0	ST1
ERR025070_ST1	Sequence data + in-house assembly	172	149	53060	177567	4073472	0.284	0	0	0	ST1
ERR025072_ST1	Sequence data + in-house assembly	122	109	80795	259599	4074072	0.2839	0	0	0	ST1
ERR025330_ST1	Sequence data + in-house assembly	141	113	86085	259599	4076720	0.2842	0	0	0	ST1
ERR025331_ST1	Sequence data + in-house assembly	129	112	82258	236514	4071062	0.2839	0	0	0	ST1
ERR025332_ST1	Sequence data + in-house assembly	126	110	79947	209752	4073255	0.2839	0	0	0	ST1
ERR025333_ST1	Sequence data + in-house assembly	144	130	56829	177699	4073672	0.284	0	0	0	ST1
ERR025334_ST1	Sequence data + in-house assembly	125	110	80902	259599	4075910	0.284	0	0	0	ST1
ERR025335_ST1	Sequence data + in-house assembly	132	109	80902	209435	4073442	0.2839	0	0	0	ST1
ERR025336_ST1	Sequence data + in-house assembly	122	101	86963	259617	4073751	0.2839	0	0	0	ST1
ERR025337_ST1	Sequence data + in-house assembly	124	109	85639	259565	4071829	0.284	0	0	0	ST1
ERR025338_ST1	Sequence data + in-house assembly	213	193	47239	122017	4067622	0.284	0	0	0	ST1
ERR025340_ST1	Sequence data + in-house assembly	337	213	37058	126528	4100465	0.2867	0	0	0	ST1
ERR025341_ST1	Sequence data + in-house assembly	129	112	80526	259599	4075742	0.284	0	0	0	ST1
ERR025343_ST1	Sequence data + in-house assembly	118	102	86199	259599	4060740	0.2831	0	0	0	ST1
ERR025344_ST1	Sequence data + in-house assembly	127	108	86529	259305	4075640	0.2845	0	0	0	ST1
ERR025345_ST1	Sequence data + in-house assembly	121	103	86206	259385	4074972	0.2845	0	0	0	ST1
ERR025346_ST1	Sequence data + in-house assembly	119	107	80543	347483	4071022	0.2845	0	0	0	ST1
ERR025347_ST1	Sequence data + in-house assembly	128	105	86085	236442	4074907	0.2845	0	0	0	ST1
ERR025348_ST1	Sequence data + in-house assembly	123	102	86085	259351	4074137	0.2845	0	0	0	ST1
ERR025350_ST1	Sequence data + in-house assembly	122	107	85889	259339	4102233	0.2859	0	0	0	ST1
ERR025351_ST1	Sequence data + in-house assembly	350	324	23008	95873	4057009	0.2851	0	0	0	ST1
ERR025352_ST1	Sequence data + in-house assembly	126	106	80761	259339	4076785	0.2845	1	0	0	ST1
ERR025353_ST1	Sequence data + in-house assembly	118	101	86201	259339	4074091	0.2845	0	0	0	ST1
ERR025354_ST1	Sequence data + in-house assembly	126	106	96271	259339	4073718	0.2845	0	0	0	ST1
ERR026352_ST1	Sequence data + in-house assembly	119	102	86085	259599	4019243	0.2831	1	0	0	ST1
ERR026353_ST1	Sequence data + in-house assembly	811	565	19198	95355	4521785	0.2868	2	0	0	ST1
ERR026354_ST1	Sequence data + in-house assembly	118	103	96226	259385	4072798	0.2845	0	0	0	ST1
ERR026355_ST1	Sequence data + in-house assembly	262	234	34886	98663	4064732	0.2848	0	0	0	ST1
ERR026356_ST1	Sequence data + in-house assembly	125	109	86085	259335	4074164	0.2845	0	0	0	ST1
ERR026357_ST1	Sequence data + in-house assembly	723	478	30880	133768	4698454	0.2878	3	0	0	ST1
ERR026358_ST1	Sequence data + in-house assembly	119	105	96192	259385	4072853	0.2845	0	0	0	ST1
ERR026359_ST1	Sequence data + in-house assembly	121	105	96226	236514	4075083	0.2845	1	0	0	ST1
ERR026360_ST1	Sequence data + in-house assembly	852	783	7784	71645	3992906	0.2868	3	0	0	ST1
ERR026361_ST1	Sequence data + in-house assembly	129	112	80539	236442	4074564	0.2845	0	0	0	ST1
ERR026362_ST1	Sequence data + in-house assembly	123	106	96226	259339	4073738	0.2845	0	0	0	ST1
ERR026363_ST1	Sequence data + in-house assembly	125	106	85563	236442	4075543	0.2845	1	0	0	ST1
ERR026365_ST1	Sequence data + in-house assembly	122	105	86199	259339	4074062	0.2845	0	0	0	ST1
ERR026366_ST1	Sequence data + in-house assembly	119	100	96226	259385	4074398	0.2845	0	0	0	ST1
ERR026367_ST1	Sequence data + in-house assembly	119	103	86162	259339	4074936	0.2845	0	0	0	ST1
ERR026368_ST1	Sequence data + in-house assembly	194	174	47175	175330	4073697	0.2846	0	0	0	ST1
ERR026369_ST1	Sequence data + in-house assembly	119	102	96226	259335	4074158	0.2845	0	0	0	ST1
ERR026370_ST1	Sequence data + in-house assembly	121	104	96226	259339	4074058	0.2845	0	0	0	ST1
ERR026371_ST1	Sequence data + in-house assembly	133	109	85767	236458	4074846	0.2845	0	0	0	ST1
ERR026372_ST1	Sequence data + in-house assembly	123	105	86085	259256	4073391	0.2845	0	0	0	ST1
ERR026373_ST1	Sequence data + in-house assembly	514	479	15379	72731	4034748	0.2857	0	0	0	ST1
ERR026374_ST1	Sequence data + in-house assembly	146	127	65013	177651	4174063	0.2878	0	0	0	ST1
ERR026375_ST1	Sequence data + in-house assembly	124	106	96271	259339	4115575	0.2847	0	0	0	ST1
ERR026376_ST1	Sequence data + in-house assembly	132	108	96271	259305	4075561	0.2844	0	0	0	ST1
ERR026378_ST1	Sequence data + in-house assembly	208	66	134526	309962	4108415	0.2848	0	0	0	ST1
ERR026379_ST1	Sequence data + in-house assembly	123	104	96271	259305	4073947	0.2845	0	0	0	ST1
ERR026380_ST1	Sequence data + in-house assembly	127	107	85480	259305	4076312	0.2845	0	0	0	ST1
ERR026381_ST1	Sequence data + in-house assembly	135	116	79329	177572	4076819	0.2845	0	0	0	ST1
ERR026382_ST1	Sequence data + in-house assembly	238	66	134526	309962	4113600	0.2848	0	0	0	ST1
ERR026383_ST1	Sequence data + in-house assembly	125	104	96226	259339	4075841	0.2845	0	0	0	ST1
ERR026384_ST1	Sequence data + in-house assembly	127	108	85480	259339	4077860	0.2845	0	0	0	ST1
ERR026386_ST1	Sequence data + in-house assembly	325	299	27305	85769	4061570	0.285	0	0	0	ST1
ERR026387_ST1	Sequence data + in-house assembly	117	99	96256	259305	4076744	0.2845	0	0	0	ST1
ERR026388_ST1	Sequence data + in-house assembly	124	102	96031	259335	4075247	0.2845	0	0	0	ST1
ERR026389_ST1	Sequence data + in-house assembly	125	105	96226	259335	4075499	0.2845	0	0	0	ST1
ERR026391_ST1	Sequence data + in-house assembly	121	101	96226	259339	4075336	0.2845	0	0	0	ST1
ERR026392_ST1	Sequence data + in-house assembly	122	104	96226	258516	4072088	0.2844	0	0	0	ST1
ERR026393_ST1	Sequence data + in-house assembly	118	104	96271	236530	4074566	0.2845	0	0	0	ST1
ERR026394_ST1	Sequence data + in-house assembly	122	108	86206	236514	4084097	0.2847	0	0	0	ST1
ERR026395_ST1	Sequence data + in-house assembly	116	100	86085	259351	4071874	0.2845	0	0	0	ST1
ERR026396_ST1	Sequence data + in-house assembly	118	99	96226	259339	4076496	0.2845	0	0	0	ST1
ERR026397_ST1	Sequence data + in-house assembly	125	107	86085	259339	4075426	0.2845	0	0	0	ST1
ERR026398_ST1	Sequence data + in-house assembly	122	106	96271	259339	4074723	0.2845	0	0	0	ST1
ERR026399_ST1	Sequence data + in-house assembly	366	332	22012	91464	4054185	0.2851	0	0	0	ST1
ERR026400_ST1	Sequence data + in-house assembly	126	109	86206	259305	4077608	0.2844	1	0	0	ST1
ERR026401_ST1	Sequence data + in-house assembly	215	65	134526	309962	4115335	0.285	0	0	0	ST1
ERR026402_ST1	Sequence data + in-house assembly	118	105	85935	236514	4018686	0.2831	0	0	0	ST1
ERR026404_ST1	Sequence data + in-house assembly	129	111	85863	259335	4076942	0.2845	0	0	0	ST1
ERR026405_ST1	Sequence data + in-house assembly	118	103	96226	259339	4073470	0.2845	0	0	0	ST1
ERR026406_ST1	Sequence data + in-house assembly	127	106	86085	401282	4060285	0.2831	0	0	0	ST1
ERR026407_ST1	Sequence data + in-house assembly	142	125	67111	207956	4023740	0.2832	0	0	0	ST1
ERR026408_ST1	Sequence data + in-house assembly	124	105	96271	259305	4075691	0.2845	0	0	0	ST1
ERR026409_ST1	Sequence data + in-house assembly	124	106	96271	259339	4076233	0.2845	0	0	0	ST1
ERR026410_ST1	Sequence data + in-house assembly	114	100	96256	259338	4072575	0.2845	0	0	0	ST1
ERR026411_ST1	Sequence data + in-house assembly	123	104	96271	259339	4072904	0.2844	0	0	0	ST1
ERR026412_ST1	Sequence data + in-house assembly	323	293	27532	78971	4064000	0.285	1	0	0	ST1
ERR026413_ST1	Sequence data + in-house assembly	122	103	96226	259339	4076704	0.2846	0	0	0	ST1
ERR026414_ST1	Sequence data + in-house assembly	126	106	80795	259339	4077360	0.2845	0	0	0	ST1
ERR026415_ST1	Sequence data + in-house assembly	120	103	86085	259339	4076016	0.2845	1	0	0	ST1
ERR026417_ST1	Sequence data + in-house assembly	124	104	80704	259351	4071537	0.2845	4	0	0	ST1
ERR026418_ST1	Sequence data + in-house assembly	141	114	86085	259335	4123208	0.2851	2	0	0	ST1
ERR026419_ST1	Sequence data + in-house assembly	122	105	96271	236518	4072986	0.2844	3	0	0	ST1
ERR026422_ST1	Sequence data + in-house assembly	120	100	86085	236446	4071614	0.2845	1	0	0	ST1
ERR026423_ST1	Sequence data + in-house assembly	133	111	80704	259347	4073072	0.2845	6	0	0	ST1
ERR026424_ST1	Sequence data + in-house assembly	123	105	85847	259339	4084738	0.2851	5	0	0	ST1
ERR026426_ST1	Sequence data + in-house assembly	137	112	79937	259301	4074424	0.2845	4	0	0	ST1
ERR026830_ST1	Sequence data + in-house assembly	130	105	89766	259272	4089894	0.285	0	0	0	ST1
ERR026831_ST1	Sequence data + in-house assembly	124	101	96271	259385	4076335	0.2845	0	0	0	ST1
ERR026832_ST1	Sequence data + in-house assembly	125	102	86085	259339	4076211	0.2844	0	0	0	ST1
ERR026833_ST1	Sequence data + in-house assembly	132	103	86307	259357	4080508	0.2845	0	0	0	ST1
ERR026834_ST1	Sequence data + in-house assembly	126	101	86085	259285	4078601	0.2845	0	0	0	ST1
ERR026835_ST1	Sequence data + in-house assembly	123	98	96222	259339	4080093	0.2845	0	0	0	ST1
ERR026836_ST1	Sequence data + in-house assembly	135	108	86085	259319	4080840	0.2845	0	0	0	ST1
ERR026837_ST1	Sequence data + in-house assembly	133	107	86085	259272	4091446	0.285	0	0	0	ST1
ERR026838_ST1	Sequence data + in-house assembly	230	192	39645	175646	4089088	0.2852	0	0	0	ST1
ERR026839_ST1	Sequence data + in-house assembly	127	102	86085	259385	4076139	0.2844	0	0	0	ST1
ERR026840_ST1	Sequence data + in-house assembly	126	107	96271	259385	4079653	0.2845	0	0	0	ST1
ERR026841_ST1	Sequence data + in-house assembly	120	103	86085	236484	4021335	0.2831	0	0	0	ST1
ERR026843_ST1	Sequence data + in-house assembly	218	68	141744	299169	4134358	0.2852	0	0	0	ST1
ERR026844_ST1	Sequence data + in-house assembly	118	102	86085	259301	4076041	0.2845	0	0	0	ST1
ERR026845_ST1	Sequence data + in-house assembly	122	105	86300	259301	4075557	0.2845	0	0	0	ST1
ERR026847_ST1	Sequence data + in-house assembly	130	108	85656	259339	4078742	0.2844	0	0	0	ST1
ERR026849_ST1	Sequence data + in-house assembly	121	105	96271	259583	4079032	0.2845	0	0	0	ST1
ERR026850_ST1	Sequence data + in-house assembly	123	102	96271	259335	4077536	0.2845	0	0	0	ST1
ERR026852_ST1	Sequence data + in-house assembly	127	112	80549	209440	4106812	0.2858	0	0	0	ST1
ERR026856_ST1	Sequence data + in-house assembly	131	103	86085	236442	4088716	0.285	0	0	0	ST1
ERR026857_ST1	Sequence data + in-house assembly	118	102	86085	259339	4074857	0.2845	0	0	0	ST1
ERR026858_ST1	Sequence data + in-house assembly	149	122	68697	269871	4077621	0.2845	0	0	0	ST1
ERR026859_ST1	Sequence data + in-house assembly	361	331	21628	107926	4061016	0.2849	0	0	0	ST1
ERR026861_ST1	Sequence data + in-house assembly	128	106	85563	259355	4088122	0.285	0	0	0	ST1
ERR026862_ST1	Sequence data + in-house assembly	119	107	96271	259355	4087819	0.2851	0	0	0	ST1
ERR026863_ST1	Sequence data + in-house assembly	232	68	134532	309962	4111966	0.2848	0	0	0	ST1
ERR026864_ST1	Sequence data + in-house assembly	237	213	42482	126314	4071590	0.2847	1	0	0	ST1
ERR026865_ST1	Sequence data + in-house assembly	135	112	79329	236514	4077828	0.2845	0	0	0	ST1
ERR026866_ST1	Sequence data + in-house assembly	210	77	134532	309962	4110983	0.2848	0	0	0	ST1
ERR026867_ST1	Sequence data + in-house assembly	134	106	86084	259381	4078253	0.2845	0	0	0	ST1
ERR026869_ST1	Sequence data + in-house assembly	130	106	86085	259339	4076413	0.2845	0	0	0	ST1
ERR026870_ST1	Sequence data + in-house assembly	123	105	85740	259355	4086606	0.2851	0	0	0	ST1
ERR026871_ST1	Sequence data + in-house assembly	237	76	134556	276753	4125500	0.2854	0	0	0	ST1
ERR026872_ST1	Sequence data + in-house assembly	231	204	41803	146843	4087146	0.2852	0	0	0	ST1
ERR026873_ST1	Sequence data + in-house assembly	127	110	86085	259339	4074921	0.2845	0	0	0	ST1
ERR026874_ST1	Sequence data + in-house assembly	132	108	85656	259256	4077438	0.2844	0	0	0	ST1
ERR026875_ST1	Sequence data + in-house assembly	222	72	134556	276753	4123474	0.2853	0	0	0	ST1
ERR026876_ST1	Sequence data + in-house assembly	208	64	134556	394916	4139966	0.2861	0	0	0	ST1
ERR026877_ST1	Sequence data + in-house assembly	333	304	25954	110857	4076370	0.2854	0	0	0	ST1
ERR026878_ST1	Sequence data + in-house assembly	312	227	38228	100885	4091993	0.2858	1	0	0	ST1
ERR026879_ST1	Sequence data + in-house assembly	129	107	86085	259355	4089516	0.285	0	0	0	ST1
ERR026880_ST1	Sequence data + in-house assembly	119	101	88246	259339	4075432	0.2844	0	0	0	ST1
ERR027376_ST1	Sequence data + in-house assembly	93	61	150140	372043	4108036	0.2847	0	0	0	ST1
ERR027377_ST1	Sequence data + in-house assembly	85	61	142178	407784	4104017	0.2847	0	0	0	ST1
ERR027385_ST1	Sequence data + in-house assembly	189	84	111121	339606	4160711	0.2866	0	0	0	ST1
ERR027386_ST1	Sequence data + in-house assembly	147	73	141605	281120	4152525	0.2864	0	0	0	ST1
ERR028721_ST1	Sequence data + in-house assembly	123	105	86085	259339	4074152	0.2844	1	0	0	ST1
ERR028722_ST1	Sequence data + in-house assembly	115	104	86085	259335	4073387	0.2845	0	0	0	ST1
ERR028723_ST1	Sequence data + in-house assembly	240	68	134556	310123	4055623	0.2834	0	0	0	ST1
ERR028724_ST1	Sequence data + in-house assembly	136	121	79329	177625	4074194	0.2846	0	0	0	ST1
ERR028725_ST1	Sequence data + in-house assembly	127	112	86679	259335	4075032	0.2844	1	0	0	ST1
ERR028726_ST1	Sequence data + in-house assembly	119	102	96226	259339	4074439	0.2844	0	0	0	ST1
ERR028727_ST1	Sequence data + in-house assembly	117	105	85656	259339	4073481	0.2844	0	0	0	ST1
ERR028728_ST1	Sequence data + in-house assembly	120	108	86307	259339	4073730	0.2845	0	0	0	ST1
ERR028729_ST1	Sequence data + in-house assembly	376	347	22380	119502	4061210	0.2851	0	0	0	ST1
ERR028730_ST1	Sequence data + in-house assembly	131	107	77834	259335	4078252	0.2845	0	0	0	ST1
ERR028731_ST1	Sequence data + in-house assembly	130	110	79948	259339	4074745	0.2845	0	0	0	ST1
ERR028732_ST1	Sequence data + in-house assembly	119	108	80795	301247	4073580	0.2845	0	0	0	ST1
ERR029481_ST1	Sequence data + in-house assembly	147	103	86085	259252	4080234	0.2845	1	0	0	ST1
ERR029482_ST1	Sequence data + in-house assembly	128	96	96271	259339	4075519	0.2844	0	0	0	ST1
ERR029483_ST1	Sequence data + in-house assembly	130	103	86200	259339	4088055	0.2851	0	0	0	ST1
ERR029484_ST1	Sequence data + in-house assembly	191	161	53817	154937	4060892	0.2833	0	0	0	ST1
ERR029485_ST1	Sequence data + in-house assembly	127	104	86085	259338	4081176	0.2845	2	0	0	ST1
ERR029486_ST1	Sequence data + in-house assembly	127	105	86085	259305	4107726	0.2858	0	0	0	ST1
ERR029487_ST1	Sequence data + in-house assembly	126	104	97973	259693	4079210	0.2845	0	0	0	ST1
ERR029488_ST1	Sequence data + in-house assembly	118	100	86302	259385	4075699	0.2845	0	0	0	ST1
ERR029489_ST1	Sequence data + in-house assembly	423	380	19065	86632	4057561	0.2852	0	0	0	ST1
ERR029490_ST1	Sequence data + in-house assembly	135	103	80531	259305	4079127	0.2845	0	0	0	ST1
ERR029491_ST1	Sequence data + in-house assembly	124	104	86085	259339	4075888	0.2845	0	0	0	ST1
ERR029492_ST1	Sequence data + in-house assembly	128	100	86085	401087	4075938	0.2845	0	0	0	ST1
ERR029494_ST1	Sequence data + in-house assembly	138	110	85862	259355	4091144	0.285	1	0	0	ST1
ERR029495_ST1	Sequence data + in-house assembly	125	103	96271	259355	4088462	0.285	0	0	0	ST1
ERR029496_ST1	Sequence data + in-house assembly	123	110	89108	259355	4088918	0.285	0	0	0	ST1
ERR029497_ST1	Sequence data + in-house assembly	159	128	77601	149158	4091533	0.2852	0	0	0	ST1
ERR029498_ST1	Sequence data + in-house assembly	126	105	89139	259124	4087406	0.285	0	0	0	ST1
ERR029499_ST1	Sequence data + in-house assembly	234	73	134526	309924	4115360	0.2848	4	0	0	ST1
ERR029500_ST1	Sequence data + in-house assembly	136	104	86085	259339	4078793	0.2844	0	0	0	ST1
ERR029501_ST1	Sequence data + in-house assembly	125	99	89139	259339	4075855	0.2844	0	0	0	ST1
ERR029502_ST1	Sequence data + in-house assembly	332	284	27538	91620	4092697	0.2862	2	0	0	ST1
ERR029503_ST1	Sequence data + in-house assembly	146	108	89640	259252	4085345	0.2844	0	0	0	ST1
ERR029504_ST1	Sequence data + in-house assembly	163	125	87802	259351	4129508	0.285	1	0	0	ST1
ERR029505_ST1	Sequence data + in-house assembly	147	110	85480	236435	4079672	0.2845	0	0	0	ST1
ERR029507_ST1	Sequence data + in-house assembly	148	115	80789	259434	4107105	0.2845	0	0	0	ST1
ERR029508_ST1	Sequence data + in-house assembly	136	104	86021	236163	4023525	0.283	1	0	0	ST1
ERR029509_ST1	Sequence data + in-house assembly	143	102	86085	236363	4080431	0.2844	1	0	0	ST1
ERR029510_ST1	Sequence data + in-house assembly	184	139	60997	209576	4024020	0.2835	0	0	0	ST1
ERR029511_ST1	Sequence data + in-house assembly	155	119	85896	249149	4112762	0.2845	0	0	0	ST1
ERR029512_ST1	Sequence data + in-house assembly	302	99	128941	310182	4165477	0.2856	3	0	0	ST1
ERR029513_ST1	Sequence data + in-house assembly	216	69	134550	309963	4114044	0.2848	0	0	0	ST1
ERR029514_ST1	Sequence data + in-house assembly	139	109	89139	259316	4120749	0.2859	0	0	0	ST1
ERR029515_ST1	Sequence data + in-house assembly	322	274	29178	99650	4013300	0.2837	1	0	0	ST1
ERR029516_ST1	Sequence data + in-house assembly	153	122	70263	236205	4081223	0.2845	0	0	0	ST1
ERR029517_ST1	Sequence data + in-house assembly	227	79	134532	310234	4135537	0.2848	0	0	0	ST1
ERR029518_ST1	Sequence data + in-house assembly	186	114	86963	236536	4108247	0.2846	0	0	0	ST1
ERR029520_ST1	Sequence data + in-house assembly	165	120	82257	207888	4026995	0.2835	0	0	0	ST1
ERR029523_ST1	Sequence data + in-house assembly	215	145	64759	177603	4104675	0.2846	0	0	0	ST1
ERR029524_ST1	Sequence data + in-house assembly	153	118	85878	207948	4026966	0.2835	1	0	0	ST1
ERR029525_ST1	Sequence data + in-house assembly	221	78	134532	276740	4061736	0.2838	0	0	0	ST1
ERR029526_ST1	Sequence data + in-house assembly	159	123	79952	207955	4027833	0.2833	0	0	0	ST1
ERR029527_ST1	Sequence data + in-house assembly	317	101	125754	309889	4230958	0.2838	1	0	0	ST1
ERR029528_ST1	Sequence data + in-house assembly	374	311	27559	133932	4182432	0.2844	3	0	0	ST1
ERR029529_ST1	Sequence data + in-house assembly	258	75	125093	276749	4057781	0.2835	0	0	0	ST1
ERR029531_ST1	Sequence data + in-house assembly	129	104	89827	259252	4080938	0.2845	0	0	0	ST1
ERR029533_ST1	Sequence data + in-house assembly	245	76	134550	310004	4112420	0.2848	3	0	0	ST1
ERR029534_ST1	Sequence data + in-house assembly	205	77	134532	309962	4116361	0.2847	0	0	0	ST1
ERR029535_ST1	Sequence data + in-house assembly	220	74	134526	309924	4116292	0.2847	0	0	0	ST1
ERR029536_ST1	Sequence data + in-house assembly	163	134	67339	122971	4074618	0.2846	6	0	0	ST1
ERR029537_ST1	Sequence data + in-house assembly	178	144	81283	259645	4363557	0.2807	0	0	0	ST1
ERR029538_ST1	Sequence data + in-house assembly	157	111	82251	236435	4081781	0.2839	0	0	0	ST1
ERR029539_ST1	Sequence data + in-house assembly	130	100	96271	259339	4105173	0.2852	1	0	0	ST1
ERR029540_ST1	Sequence data + in-house assembly	138	104	89139	259256	4079959	0.2845	0	0	0	ST1
ERR029541_ST1	Sequence data + in-house assembly	303	259	31555	106691	4013775	0.2834	1	0	0	ST1
ERR029542_ST1	Sequence data + in-house assembly	154	116	79305	259056	4057591	0.2844	2	0	0	ST1
ERR029544_ST1	Sequence data + in-house assembly	133	107	86221	259339	4081875	0.2845	0	0	0	ST1
ERR030283_ST1	Sequence data + in-house assembly	131	105	86085	259339	4079313	0.2845	0	0	0	ST1
ERR030284_ST1	Sequence data + in-house assembly	126	98	96271	259305	4077702	0.2844	0	0	0	ST1
ERR030285_ST1	Sequence data + in-house assembly	126	101	96271	259285	4077814	0.2845	0	0	0	ST1
ERR030286_ST1	Sequence data + in-house assembly	143	117	79329	207956	4070132	0.2845	0	0	0	ST1
ERR030287_ST1	Sequence data + in-house assembly	127	105	92636	209440	4078163	0.2845	0	0	0	ST1
ERR030288_ST1	Sequence data + in-house assembly	130	108	85868	259351	4078454	0.2844	0	0	0	ST1
ERR030289_ST1	Sequence data + in-house assembly	129	101	86301	259256	4104647	0.2858	0	0	0	ST1
ERR030290_ST1	Sequence data + in-house assembly	128	103	90181	259305	4079249	0.2844	0	0	0	ST1
ERR030291_ST1	Sequence data + in-house assembly	347	301	27422	106192	4069291	0.2849	0	0	0	ST1
ERR030292_ST1	Sequence data + in-house assembly	135	114	85896	207896	4080050	0.2845	0	0	0	ST1
ERR030293_ST1	Sequence data + in-house assembly	128	107	86085	259339	4080353	0.2845	0	0	0	ST1
ERR030294_ST1	Sequence data + in-house assembly	138	110	86085	259252	4089381	0.2846	0	0	0	ST1
ERR030296_ST1	Sequence data + in-house assembly	134	106	86085	259339	4078327	0.2845	0	0	0	ST1
ERR030297_ST1	Sequence data + in-house assembly	126	103	85480	259256	4076030	0.2844	0	0	0	ST1
ERR030298_ST1	Sequence data + in-house assembly	129	105	89207	259256	4076525	0.2844	0	0	0	ST1
ERR030299_ST1	Sequence data + in-house assembly	177	141	59767	177582	4076305	0.2846	0	0	0	ST1
ERR030300_ST1	Sequence data + in-house assembly	126	106	86085	259385	4081333	0.2845	0	0	0	ST1
ERR030301_ST1	Sequence data + in-house assembly	123	106	96271	259335	4079196	0.2845	0	0	0	ST1
ERR030302_ST1	Sequence data + in-house assembly	131	107	85480	209440	4078128	0.2845	0	0	0	ST1
ERR030303_ST1	Sequence data + in-house assembly	133	108	86306	259339	4107403	0.2858	0	0	0	ST1
ERR030304_ST1	Sequence data + in-house assembly	464	408	18618	73836	4057388	0.2853	0	0	0	ST1
ERR030305_ST1	Sequence data + in-house assembly	148	108	86085	191944	4082553	0.2845	0	0	0	ST1
ERR030306_ST1	Sequence data + in-house assembly	136	105	85563	209439	4078750	0.2845	0	0	0	ST1
ERR030307_ST1	Sequence data + in-house assembly	129	107	80536	259339	4077359	0.2845	0	0	0	ST1
ERR030309_ST1	Sequence data + in-house assembly	120	105	86085	259339	4076000	0.2845	0	0	0	ST1
ERR030310_ST1	Sequence data + in-house assembly	121	104	96192	259339	4074030	0.2845	0	0	0	ST1
ERR030311_ST1	Sequence data + in-house assembly	119	103	96226	259339	4076147	0.2844	0	0	0	ST1
ERR030312_ST1	Sequence data + in-house assembly	240	214	41832	111939	4064049	0.2849	0	0	0	ST1
ERR030313_ST1	Sequence data + in-house assembly	119	106	86201	259339	4077569	0.2845	0	0	0	ST1
ERR030314_ST1	Sequence data + in-house assembly	129	109	86085	259339	4074171	0.2844	0	0	0	ST1
ERR030315_ST1	Sequence data + in-house assembly	128	104	86085	259339	4076058	0.2845	0	0	0	ST1
ERR030316_ST1	Sequence data + in-house assembly	126	110	85938	236804	4078477	0.2844	0	0	0	ST1
ERR030318_ST1	Sequence data + in-house assembly	128	107	86158	236442	4078248	0.2845	0	0	0	ST1
ERR030319_ST1	Sequence data + in-house assembly	127	104	85473	259809	4024761	0.2831	0	0	0	ST1
ERR030320_ST1	Sequence data + in-house assembly	123	104	96271	301247	4076828	0.2845	0	0	0	ST1
ERR030322_ST1	Sequence data + in-house assembly	121	103	86085	259351	4087852	0.285	0	0	0	ST1
ERR030323_ST1	Sequence data + in-house assembly	116	104	86085	259598	4015026	0.2831	0	0	0	ST1
ERR030324_ST1	Sequence data + in-house assembly	133	114	85638	259565	4196477	0.2892	0	0	0	ST1
ERR030325_ST1	Sequence data + in-house assembly	218	196	37270	95539	4045131	0.2833	0	0	0	ST1
ERR030326_ST1	Sequence data + in-house assembly	131	109	86085	259339	4076145	0.2845	0	0	0	ST1
ERR030327_ST1	Sequence data + in-house assembly	116	99	96271	259339	4077266	0.2845	0	0	0	ST1
ERR030328_ST1	Sequence data + in-house assembly	129	104	96271	259339	4076206	0.2845	0	0	0	ST1
ERR030329_ST1	Sequence data + in-house assembly	128	109	86085	259335	4076374	0.2845	0	0	0	ST1
ERR030330_ST1	Sequence data + in-house assembly	808	725	8807	71441	4017942	0.2864	0	0	0	ST1
ERR030331_ST1	Sequence data + in-house assembly	119	102	85646	236442	4104508	0.2858	0	0	0	ST1
ERR030333_ST1	Sequence data + in-house assembly	135	114	85556	258375	4110508	0.2839	0	0	0	ST1
ERR030335_ST1	Sequence data + in-house assembly	123	101	86085	259335	4078093	0.2845	0	0	0	ST1
ERR030336_ST1	Sequence data + in-house assembly	122	104	86085	259335	4079360	0.2845	0	0	0	ST1
ERR030337_ST1	Sequence data + in-house assembly	155	129	86085	259599	4234965	0.2825	0	0	0	ST1
ERR030338_ST1	Sequence data + in-house assembly	939	843	7751	71398	4000639	0.2868	0	0	0	ST1
ERR030339_ST1	Sequence data + in-house assembly	173	140	79920	236442	4181926	0.2831	0	0	0	ST1
ERR030340_ST1	Sequence data + in-house assembly	126	108	85515	259599	4026054	0.2831	0	0	0	ST1
ERR030341_ST1	Sequence data + in-house assembly	127	106	86085	259599	4062905	0.2831	0	0	0	ST1
ERR030342_ST1	Sequence data + in-house assembly	132	112	86199	259727	4101847	0.2834	0	0	0	ST1
ERR030344_ST1	Sequence data + in-house assembly	144	124	79329	259599	4151617	0.2832	0	0	0	ST1
ERR030345_ST1	Sequence data + in-house assembly	115	101	86300	259599	4020729	0.2831	0	0	0	ST1
ERR030346_ST1	Sequence data + in-house assembly	122	106	96192	259697	4079130	0.2844	0	0	0	ST1
ERR030348_ST1	Sequence data + in-house assembly	125	106	80625	259256	4073299	0.2844	0	0	0	ST1
ERR030349_ST1	Sequence data + in-house assembly	120	103	96226	259339	4075765	0.2844	0	0	0	ST1
ERR030350_ST1	Sequence data + in-house assembly	120	106	96271	259339	4075729	0.2845	0	0	0	ST1
ERR030351_ST1	Sequence data + in-house assembly	772	702	9756	71828	4013092	0.2863	0	0	0	ST1
ERR030352_ST1	Sequence data + in-house assembly	122	106	86085	259339	4075069	0.2845	1	0	0	ST1
ERR030353_ST1	Sequence data + in-house assembly	124	102	96226	259305	4075888	0.2845	0	0	0	ST1
ERR030354_ST1	Sequence data + in-house assembly	124	110	86205	259335	4072613	0.2845	0	0	0	ST1
ERR030355_ST1	Sequence data + in-house assembly	120	104	86085	259339	4075804	0.2844	0	0	0	ST1
ERR030357_ST1	Sequence data + in-house assembly	130	113	79329	236442	4077998	0.2845	0	0	0	ST1
ERR030358_ST1	Sequence data + in-house assembly	122	108	86085	259339	4076691	0.2845	0	0	0	ST1
ERR030359_ST1	Sequence data + in-house assembly	123	106	85473	259599	4018330	0.2831	0	0	0	ST1
ERR030361_ST1	Sequence data + in-house assembly	125	104	86465	259305	4077951	0.2845	0	0	0	ST1
ERR030362_ST1	Sequence data + in-house assembly	124	106	86085	259339	4076425	0.2845	0	0	0	ST1
ERR030363_ST1	Sequence data + in-house assembly	125	105	86085	259339	4074240	0.2845	0	0	0	ST1
ERR030364_ST1	Sequence data + in-house assembly	718	645	9817	59495	4013729	0.2862	2	0	0	ST1
ERR030365_ST1	Sequence data + in-house assembly	125	105	86085	259339	4076296	0.2845	0	0	0	ST1
ERR030366_ST1	Sequence data + in-house assembly	122	106	96192	259385	4081135	0.2844	0	0	0	ST1
ERR030367_ST1	Sequence data + in-house assembly	131	112	85522	236514	4078765	0.2845	0	0	0	ST1
ERR030368_ST1	Sequence data + in-house assembly	124	107	86085	236514	4020717	0.2831	0	0	0	ST1
ERR030370_ST1	Sequence data + in-house assembly	132	106	86963	236412	4077475	0.2845	0	0	0	ST1
ERR030371_ST1	Sequence data + in-house assembly	121	100	96271	259335	4079526	0.2845	0	0	0	ST1
ERR030372_ST1	Sequence data + in-house assembly	123	106	86085	259339	4077822	0.2845	0	0	0	ST1
ERR030374_ST1	Sequence data + in-house assembly	134	105	80993	259056	4080283	0.2845	0	0	0	ST1
ERR030375_ST1	Sequence data + in-house assembly	142	109	86085	259339	4083504	0.2844	0	0	0	ST1
ERR030376_ST1	Sequence data + in-house assembly	126	106	86085	259339	4078099	0.2845	0	0	0	ST1
ERR030377_ST1	Sequence data + in-house assembly	207	176	53261	170473	4071451	0.2847	0	0	0	ST1
ERR030378_ST1	Sequence data + in-house assembly	131	103	86359	259252	4079577	0.2845	0	0	0	ST1
ERR030379_ST1	Sequence data + in-house assembly	142	108	81250	259385	4094466	0.285	0	0	0	ST1
ERR030380_ST1	Sequence data + in-house assembly	127	102	86158	259351	4089161	0.285	0	0	0	ST1
ERR030381_ST1	Sequence data + in-house assembly	135	110	96271	259355	4089721	0.2851	0	0	0	ST1
ERR030384_ST1	Sequence data + in-house assembly	818	520	27413	96718	4547243	0.2868	0	0	0	ST1
ERR030385_ST1	Sequence data + in-house assembly	140	105	86306	259599	4026107	0.2831	0	0	0	ST1
ERR030387_ST1	Sequence data + in-house assembly	125	110	96271	259357	4077280	0.2845	0	0	0	ST1
ERR030388_ST1	Sequence data + in-house assembly	123	107	86085	259339	4075391	0.2845	0	0	0	ST1
ERR030389_ST1	Sequence data + in-house assembly	125	106	89507	259339	4074748	0.2845	0	0	0	ST1
ERR030390_ST1	Sequence data + in-house assembly	245	219	34527	98148	4106621	0.2852	0	0	0	ST1
ERR030391_ST1	Sequence data + in-house assembly	126	105	86085	259305	4074564	0.2845	0	0	0	ST1
ERR030392_ST1	Sequence data + in-house assembly	125	110	85473	236442	4080829	0.2844	0	0	0	ST1
ERR030393_ST1	Sequence data + in-house assembly	124	104	86201	259339	4073712	0.2845	0	0	0	ST1
ERR030394_ST1	Sequence data + in-house assembly	124	104	86085	259339	4078259	0.2845	0	0	0	ST1
ERR030395_ST1	Sequence data + in-house assembly	761	695	9024	71465	4023246	0.2862	1	0	0	ST1
ERR030396_ST1	Sequence data + in-house assembly	126	110	81166	401287	4077689	0.2845	0	0	0	ST1
ERR030397_ST1	Sequence data + in-house assembly	125	109	80795	236442	4018899	0.2831	0	0	0	ST1
ERR030398_ST1	Sequence data + in-house assembly	127	106	86085	259339	4076503	0.2845	0	0	0	ST1
ERR031674_ST1	Sequence data + in-house assembly	136	102	86158	259389	4112137	0.2858	0	0	0	ST1
ERR031675_ST1	Sequence data + in-house assembly	163	125	80761	259367	4119731	0.2857	0	0	0	ST1
ERR031676_ST1	Sequence data + in-house assembly	128	105	89139	259401	4090481	0.285	0	0	0	ST1
ERR031677_ST1	Sequence data + in-house assembly	195	156	55718	146840	4076374	0.2847	0	0	0	ST1
ERR031678_ST1	Sequence data + in-house assembly	138	108	86085	259252	4080731	0.2845	2	0	0	ST1
ERR031680_ST1	Sequence data + in-house assembly	144	111	86085	259351	4083229	0.2844	0	0	0	ST1
ERR031681_ST1	Sequence data + in-house assembly	144	109	89514	259252	4093791	0.285	0	0	0	ST1
ERR031682_ST1	Sequence data + in-house assembly	550	489	14252	78629	4067569	0.2859	0	0	0	ST1
ERR031683_ST1	Sequence data + in-house assembly	147	115	80059	236235	4092389	0.2851	0	0	0	ST1
ERR031685_ST1	Sequence data + in-house assembly	144	108	86085	259252	4093116	0.2851	0	0	0	ST1
ERR031687_ST1	Sequence data + in-house assembly	750	187	79305	259108	4287020	0.2946	0	0	0	ST1
ERR031689_ST1	Sequence data + in-house assembly	177	130	80777	236442	4119178	0.2849	0	0	0	ST1
ERR031690_ST1	Sequence data + in-house assembly	206	153	73938	183708	4117745	0.2849	0	0	0	ST1
ERR031691_ST1	Sequence data + in-house assembly	135	106	87634	259056	4079970	0.2845	0	0	0	ST1
ERR031692_ST1	Sequence data + in-house assembly	134	107	96256	259056	4079888	0.2845	0	0	0	ST1
ERR031693_ST1	Sequence data + in-house assembly	147	111	96271	259285	4084374	0.2845	0	0	0	ST1
ERR031694_ST1	Sequence data + in-house assembly	128	104	86160	259285	4079772	0.2845	0	0	0	ST1
ERR031695_ST1	Sequence data + in-house assembly	687	606	11050	71912	4037319	0.2858	0	0	0	ST1
ERR031696_ST1	Sequence data + in-house assembly	142	103	79948	236122	4023879	0.2831	0	0	0	ST1
ERR031697_ST1	Sequence data + in-house assembly	138	106	94438	258308	4078735	0.2845	0	0	0	ST1
ERR031698_ST1	Sequence data + in-house assembly	139	103	96271	259131	4078800	0.2845	0	0	0	ST1
ERR031700_ST1	Sequence data + in-house assembly	139	105	86085	259339	4081206	0.2845	0	0	0	ST1
ERR031701_ST1	Sequence data + in-house assembly	132	103	86085	236122	4079599	0.2845	0	0	0	ST1
ERR031702_ST1	Sequence data + in-house assembly	143	106	96271	259256	4083693	0.2844	0	0	0	ST1
ERR031703_ST1	Sequence data + in-house assembly	224	83	129046	309946	4113576	0.2848	0	0	0	ST1
ERR031704_ST1	Sequence data + in-house assembly	139	104	86085	259339	4081024	0.2845	0	0	0	ST1
ERR031705_ST1	Sequence data + in-house assembly	144	107	85713	259252	4101837	0.2857	0	0	0	ST1
ERR031706_ST1	Sequence data + in-house assembly	153	116	85522	259156	4099183	0.2856	0	0	0	ST1
ERR031707_ST1	Sequence data + in-house assembly	126	100	96271	259339	4106134	0.2858	0	0	0	ST1
ERR031708_ST1	Sequence data + in-house assembly	676	606	11271	71455	4042416	0.2856	0	0	0	ST1
ERR031709_ST1	Sequence data + in-house assembly	151	113	77643	236435	4078014	0.2845	1	0	0	ST1
ERR031710_ST1	Sequence data + in-house assembly	148	108	76751	259056	4082779	0.2845	0	0	0	ST1
ERR031711_ST1	Sequence data + in-house assembly	123	99	86085	259599	4022623	0.2831	0	0	0	ST1
ERR044801_ST1	Sequence data + in-house assembly	274	84	128940	310221	4156161	0.2858	0	0	0	ST1
ERR044802_ST1	Sequence data + in-house assembly	130	107	89139	302276	4074910	0.2852	0	0	0	ST1
ERR044803_ST1	Sequence data + in-house assembly	273	70	134532	309598	4111134	0.2848	0	0	0	ST1
ERR044804_ST1	Sequence data + in-house assembly	235	76	134526	309961	4132562	0.2856	0	0	0	ST1
ERR044805_ST1	Sequence data + in-house assembly	240	73	134532	310071	4112695	0.2848	0	0	0	ST1
ERR044806_ST1	Sequence data + in-house assembly	243	72	141899	376348	4139148	0.2852	0	0	0	ST1
ERR044807_ST1	Sequence data + in-house assembly	235	76	134526	309945	4114015	0.2849	0	0	0	ST1
ERR044808_ST1	Sequence data + in-house assembly	261	76	134532	309958	4112686	0.2848	0	0	0	ST1
ERR044809_ST1	Sequence data + in-house assembly	122	102	96226	259335	4073354	0.2844	0	0	0	ST1
ERR044812_ST1	Sequence data + in-house assembly	246	68	134532	309962	4111546	0.2849	0	0	0	ST1
ERR044813_ST1	Sequence data + in-house assembly	242	75	134550	394810	4139842	0.2862	0	0	0	ST1
ERR044814_ST1	Sequence data + in-house assembly	250	76	132373	310222	4273875	0.283	0	0	0	ST1
ERR044815_ST1	Sequence data + in-house assembly	257	90	128941	310490	4145189	0.2835	0	0	0	ST1
ERR044816_ST1	Sequence data + in-house assembly	236	79	134556	310222	4053842	0.2835	0	0	0	ST1
ERR044817_ST1	Sequence data + in-house assembly	315	98	127641	375703	4186264	0.2838	0	0	0	ST1
ERR044818_ST1	Sequence data + in-house assembly	248	80	128805	310332	4223665	0.2831	0	0	0	ST1
ERR044819_ST1	Sequence data + in-house assembly	224	81	134532	309962	4114672	0.2849	0	0	0	ST1
ERR044820_ST1	Sequence data + in-house assembly	240	67	134532	309946	4113941	0.2849	1	0	0	ST1
ERR044821_ST1	Sequence data + in-house assembly	224	71	134532	309962	4109258	0.2849	0	0	0	ST1
ERR044822_ST1	Sequence data + in-house assembly	245	77	129026	309856	4115050	0.2849	0	0	0	ST1
ERR044823_ST1	Sequence data + in-house assembly	251	73	134532	309962	4113119	0.2849	0	0	0	ST1
ERR044824_ST1	Sequence data + in-house assembly	216	70	134532	309962	4115335	0.2848	0	0	0	ST1
ERR044825_ST1	Sequence data + in-house assembly	224	74	134532	309961	4162505	0.2856	1	0	0	ST1
ERR044826_ST1	Sequence data + in-house assembly	228	70	134556	310212	4143324	0.2863	0	0	0	ST1
ERR044827_ST1	Sequence data + in-house assembly	228	76	134572	309958	4112049	0.2848	1	0	0	ST1
ERR044828_ST1	Sequence data + in-house assembly	227	71	134599	309875	4109733	0.2848	2	0	0	ST1
ERR044829_ST1	Sequence data + in-house assembly	243	74	134532	276753	4139484	0.2855	3	0	0	ST1
ERR044830_ST1	Sequence data + in-house assembly	236	70	134526	309962	4112504	0.2848	2	0	0	ST1
ERR044831_ST1	Sequence data + in-house assembly	227	78	134532	310222	4195722	0.2837	1	0	0	ST1
ERR044832_ST1	Sequence data + in-house assembly	224	67	134526	309958	4111269	0.2848	2	0	0	ST1
ERR044833_ST1	Sequence data + in-house assembly	226	72	134532	309962	4135662	0.2855	1	0	0	ST1
ERR044834_ST1	Sequence data + in-house assembly	230	72	134550	309958	4114635	0.2848	3	0	0	ST1
ERR044835_ST1	Sequence data + in-house assembly	223	69	134556	309958	4111015	0.2848	0	0	0	ST1
ERR044837_ST1	Sequence data + in-house assembly	209	70	141655	376365	4097196	0.2849	1	0	0	ST1
ERR044838_ST1	Sequence data + in-house assembly	225	69	134532	309961	4111782	0.2849	1	0	0	ST1
ERR044839_ST1	Sequence data + in-house assembly	222	72	134532	309962	4113474	0.2848	0	0	0	ST1
ERR044840_ST1	Sequence data + in-house assembly	219	73	134532	310071	4112032	0.2848	0	0	0	ST1
ERR044841_ST1	Sequence data + in-house assembly	222	70	134532	310071	4112571	0.2848	2	0	0	ST1
ERR044842_ST1	Sequence data + in-house assembly	225	71	134532	309961	4113952	0.2848	0	0	0	ST1
ERR044843_ST1	Sequence data + in-house assembly	238	78	134532	309962	4113599	0.2848	0	0	0	ST1
ERR044844_ST1	Sequence data + in-house assembly	221	71	134526	309855	4110623	0.2848	1	0	0	ST1
ERR044845_ST1	Sequence data + in-house assembly	224	72	134532	309962	4114755	0.2848	2	0	0	ST1
ERR044847_ST1	Sequence data + in-house assembly	222	69	134556	309962	4107801	0.2849	2	0	0	ST1
ERR044848_ST1	Sequence data + in-house assembly	221	76	134532	309958	4113825	0.2848	3	0	0	ST1
ERR1256644_ST1	Sequence data + in-house assembly	128	73	117614	352088	4077526	0.2844	0	0	0	ST1
ERR125924_ST1	Sequence data + in-house assembly	372	311	81229	276171	4687018	0.292	6	0	0	ST1
ERR125938_ST1	Sequence data + in-house assembly	147	70	169147	409462	4179391	0.2846	2	0	0	ST1
ERR125940_ST1	Sequence data + in-house assembly	99	63	146591	310256	4157397	0.2846	0	0	0	ST1
ERR125941_ST1	Sequence data + in-house assembly	220	82	146937	310222	4167779	0.2846	2	0	0	ST1
ERR125943_ST1	Sequence data + in-house assembly	107	70	134600	283612	4164428	0.2846	1	0	0	ST1
ERR125944_ST1	Sequence data + in-house assembly	93	62	168979	410485	4162685	0.2845	0	0	0	ST1
ERR125945_ST1	Sequence data + in-house assembly	98	63	149332	310206	4187302	0.2855	1	0	0	ST1
ERR125946_ST1	Sequence data + in-house assembly	213	74	134532	310206	4209072	0.2848	0	0	0	ST1
ERR125947_ST1	Sequence data + in-house assembly	211	77	134532	309962	4110248	0.2848	1	0	0	ST1
ERR125948_ST1	Sequence data + in-house assembly	200	68	141770	309924	4110713	0.2848	0	0	0	ST1
ERR125949_ST1	Sequence data + in-house assembly	234	71	134532	311056	4113785	0.2848	0	0	0	ST1
ERR125950_ST1	Sequence data + in-house assembly	238	74	134532	309962	4111913	0.2848	8	0	0	ST1
ERR125952_ST1	Sequence data + in-house assembly	89	60	147139	425985	4113261	0.2848	1	0	0	ST1
ERR125953_ST1	Sequence data + in-house assembly	217	78	134532	309629	4115506	0.2848	3	0	0	ST1
ERR125954_ST1	Sequence data + in-house assembly	235	75	125531	309962	4117460	0.2849	1	0	0	ST1
ERR125955_ST1	Sequence data + in-house assembly	249	69	134532	309946	4112336	0.2849	3	0	0	ST1
ERR125963_ST1	Sequence data + in-house assembly	88	61	220763	436571	4124335	0.2853	1	0	0	ST1
ERR125964_ST1	Sequence data + in-house assembly	92	60	141200	310286	4108990	0.2847	0	0	0	ST1
ERR125975_ST1	Sequence data + in-house assembly	159	70	146789	309996	4128287	0.2848	2	0	0	ST1
ERR125978_ST1	Sequence data + in-house assembly	118	70	141447	311362	4255372	0.2884	1	0	0	ST1
ERR125979_ST1	Sequence data + in-house assembly	106	60	141599	310854	4119153	0.2853	2	0	0	ST1
ERR125991_ST1	Sequence data + in-house assembly	98	68	146819	366977	4108385	0.2847	0	0	0	ST1
ERR125992_ST1	Sequence data + in-house assembly	93	63	141193	310160	4130650	0.2854	0	0	0	ST1
ERR1544877_ST1	Sequence data + in-house assembly	481	237	49503	175560	4290321	0.2921	0	0	0	ST1
ERR1544880_ST1	Sequence data + in-house assembly	265	165	64032	170473	4210599	0.2858	0	0	0	ST1
ERR1544881_ST1	Sequence data + in-house assembly	396	256	42950	264450	4230357	0.2898	0	0	0	ST1
ERR1544882_ST1	Sequence data + in-house assembly	187	83	133882	408200	4201847	0.2899	0	0	0	ST1
ERR1544883_ST1	Sequence data + in-house assembly	289	91	134835	310837	4238622	0.2869	1	0	0	ST1
ERR1544885_ST1	Sequence data + in-house assembly	370	117	108131	236697	4247168	0.2897	0	0	0	ST1
ERR1544888_ST1	Sequence data + in-house assembly	157	72	129107	276797	4189493	0.2889	0	0	0	ST1
ERR171284_ST1	Sequence data + in-house assembly	82	60	219587	492550	4140408	0.2861	0	0	0	ST1
ERR1853156_ST1	Sequence data + in-house assembly	304	76	132093	408451	4319954	0.283	0	0	0	ST1
ERR1853181_ST1	Sequence data + in-house assembly	343	66	136773	408421	4155300	0.2858	0	0	0	ST1
ERR248711_ST1	Sequence data + in-house assembly	93	76	114931	257966	4111643	0.285	0	0	0	ST1
ERR248712_ST1	Sequence data + in-house assembly	91	70	141329	318652	4116697	0.285	0	0	0	ST1
ERR248713_ST1	Sequence data + in-house assembly	79	61	140973	425520	4111511	0.2849	1	0	0	ST1
ERR248714_ST1	Sequence data + in-house assembly	111	82	129008	299184	4122991	0.2849	0	0	0	ST1
ERR248716_ST1	Sequence data + in-house assembly	85	59	167519	424987	4116431	0.285	0	0	0	ST1
ERR248718_ST1	Sequence data + in-house assembly	81	60	143979	425520	4115103	0.285	0	0	0	ST1
ERR248719_ST1	Sequence data + in-house assembly	66	48	218195	425669	4110643	0.285	0	0	0	ST1
ERR248720_ST1	Sequence data + in-house assembly	93	71	141738	424904	4115988	0.285	0	0	0	ST1
ERR248721_ST1	Sequence data + in-house assembly	78	61	129037	289441	4111642	0.2849	0	0	0	ST1
ERR248722_ST1	Sequence data + in-house assembly	73	58	149873	425624	4114371	0.285	0	0	0	ST1
ERR248723_ST1	Sequence data + in-house assembly	90	67	141769	425176	4111207	0.285	0	0	0	ST1
ERR248724_ST1	Sequence data + in-house assembly	77	59	174246	408202	4108413	0.285	0	0	0	ST1
ERR248725_ST1	Sequence data + in-house assembly	71	55	198693	425122	4114234	0.285	0	0	0	ST1
ERR248726_ST1	Sequence data + in-house assembly	83	62	149818	425350	4109878	0.2849	0	0	0	ST1
ERR248727_ST1	Sequence data + in-house assembly	73	53	150060	407752	4109997	0.285	1	0	0	ST1
ERR248728_ST1	Sequence data + in-house assembly	91	72	129624	318431	4115760	0.2849	0	0	0	ST1
ERR248729_ST1	Sequence data + in-house assembly	130	110	93604	244894	4112902	0.285	0	0	0	ST1
ERR248730_ST1	Sequence data + in-house assembly	85	67	129030	425241	4110189	0.2849	0	0	0	ST1
ERR248731_ST1	Sequence data + in-house assembly	69	55	219115	425250	4111576	0.2849	0	0	0	ST1
ERR248732_ST1	Sequence data + in-house assembly	74	58	147287	425383	4113077	0.2849	0	0	0	ST1
ERR248733_ST1	Sequence data + in-house assembly	69	54	167211	425215	4115183	0.2849	0	0	0	ST1
ERR248734_ST1	Sequence data + in-house assembly	76	63	149977	408008	4112735	0.2849	0	0	0	ST1
ERR248735_ST1	Sequence data + in-house assembly	71	55	147262	407755	4117120	0.2849	0	0	0	ST1
ERR248736_ST1	Sequence data + in-house assembly	72	56	150046	354539	4114459	0.285	0	0	0	ST1
ERR248737_ST1	Sequence data + in-house assembly	112	96	92235	262146	4112904	0.285	0	0	0	ST1
ERR248738_ST1	Sequence data + in-house assembly	68	53	149984	407404	4111359	0.2849	1	0	0	ST1
ERR248739_ST1	Sequence data + in-house assembly	62	53	149775	354338	4115407	0.2849	0	0	0	ST1
ERR248740_ST1	Sequence data + in-house assembly	63	51	219259	425350	4112385	0.2849	0	0	0	ST1
ERR248741_ST1	Sequence data + in-house assembly	126	102	93505	241025	4108331	0.285	0	0	0	ST1
ERR248742_ST1	Sequence data + in-house assembly	69	58	137290	425450	4111915	0.285	0	0	0	ST1
ERR248743_ST1	Sequence data + in-house assembly	72	56	141962	407760	4116218	0.285	0	0	0	ST1
ERR248744_ST1	Sequence data + in-house assembly	69	52	166507	425489	4115267	0.2849	0	0	0	ST1
ERR248745_ST1	Sequence data + in-house assembly	106	91	94212	280958	4109274	0.285	0	0	0	ST1
ERR248746_ST1	Sequence data + in-house assembly	74	62	141358	425754	4115337	0.285	0	0	0	ST1
ERR248747_ST1	Sequence data + in-house assembly	79	60	134600	354348	4113230	0.285	1	0	0	ST1
ERR248748_ST1	Sequence data + in-house assembly	68	53	219598	408144	4114192	0.285	1	0	0	ST1
ERR248749_ST1	Sequence data + in-house assembly	86	69	129037	425623	4111855	0.285	0	0	0	ST1
ERR248750_ST1	Sequence data + in-house assembly	64	52	174282	425274	4111314	0.285	0	0	0	ST1
ERR248751_ST1	Sequence data + in-house assembly	73	56	219083	425307	4114933	0.2849	0	0	0	ST1
ERR248752_ST1	Sequence data + in-house assembly	69	53	219224	425384	4114715	0.2849	0	0	0	ST1
ERR248753_ST1	Sequence data + in-house assembly	74	57	172191	425248	4111386	0.2849	0	0	0	ST1
ERR248754_ST1	Sequence data + in-house assembly	74	59	147308	425274	4113754	0.285	0	0	0	ST1
ERR248755_ST1	Sequence data + in-house assembly	63	53	160594	425357	4113180	0.2849	0	0	0	ST1
ERR248756_ST1	Sequence data + in-house assembly	75	55	219217	425404	4115087	0.2849	0	0	0	ST1
ERR248757_ST1	Sequence data + in-house assembly	90	71	129555	299243	4115399	0.285	0	0	0	ST1
ERR248758_ST1	Sequence data + in-house assembly	78	60	141470	299550	4110946	0.2849	1	0	0	ST1
ERR248759_ST1	Sequence data + in-house assembly	76	60	160039	425378	4115012	0.285	0	0	0	ST1
ERR248760_ST1	Sequence data + in-house assembly	220	73	172171	424904	4165761	0.286	0	0	0	ST1
ERR248761_ST1	Sequence data + in-house assembly	63	52	219392	424980	4113970	0.285	0	0	0	ST1
ERR248762_ST1	Sequence data + in-house assembly	66	52	219083	425812	4116715	0.285	0	0	0	ST1
ERR248763_ST1	Sequence data + in-house assembly	73	54	149507	425385	4115390	0.2849	0	0	0	ST1
ERR248764_ST1	Sequence data + in-house assembly	177	139	57262	209590	4107342	0.2849	0	0	0	ST1
ERR248765_ST1	Sequence data + in-house assembly	220	187	43721	145444	4106583	0.2849	0	0	0	ST1
ERR248766_ST1	Sequence data + in-house assembly	138	103	88263	257802	4117572	0.2849	0	0	0	ST1
ERR248767_ST1	Sequence data + in-house assembly	168	141	56664	134600	4110889	0.285	0	0	0	ST1
ERR248768_ST1	Sequence data + in-house assembly	196	155	52055	126493	4112486	0.285	0	0	0	ST1
ERR248769_ST1	Sequence data + in-house assembly	174	148	62722	202348	4114388	0.2848	0	0	0	ST1
ERR248770_ST1	Sequence data + in-house assembly	131	94	99458	245014	4108897	0.2846	0	0	0	ST1
ERR248771_ST1	Sequence data + in-house assembly	242	200	40042	114582	4109346	0.2849	0	0	0	ST1
ERR248772_ST1	Sequence data + in-house assembly	215	171	52050	120147	4111880	0.285	0	0	0	ST1
ERR248773_ST1	Sequence data + in-house assembly	194	156	56035	152080	4109605	0.285	0	0	0	ST1
ERR248774_ST1	Sequence data + in-house assembly	276	232	34779	107718	4105926	0.285	0	0	0	ST1
ERR248775_ST1	Sequence data + in-house assembly	218	173	43186	126532	4112523	0.285	0	0	0	ST1
ERR248776_ST1	Sequence data + in-house assembly	188	145	56340	174183	4092063	0.285	0	0	0	ST1
ERR248777_ST1	Sequence data + in-house assembly	220	170	47346	177797	4082343	0.2849	0	0	0	ST1
ERR248778_ST1	Sequence data + in-house assembly	220	187	41977	134600	4106755	0.285	0	0	0	ST1
ERR251715_ST1	Sequence data + in-house assembly	105	66	128995	309996	4109776	0.2849	0	0	0	ST1
ERR251719_ST1	Sequence data + in-house assembly	117	80	141066	425810	4119872	0.2849	0	0	0	ST1
ERR251725_ST1	Sequence data + in-house assembly	96	61	149261	436246	4132988	0.2855	0	0	0	ST1
ERR251729_ST1	Sequence data + in-house assembly	146	74	115925	310604	4141296	0.2859	1	0	0	ST1
ERR251730_ST1	Sequence data + in-house assembly	144	107	87200	248639	4125712	0.2855	1	0	0	ST1
ERR251732_ST1	Sequence data + in-house assembly	93	67	146819	436325	4137599	0.2856	0	0	0	ST1
ERR251734_ST1	Sequence data + in-house assembly	152	99	115025	310560	4161002	0.2865	0	0	0	ST1
ERR251740_ST1	Sequence data + in-house assembly	92	64	141662	436080	4130016	0.2855	0	0	0	ST1
ERR251742_ST1	Sequence data + in-house assembly	110	75	141377	425073	4118423	0.285	0	0	0	ST1
ERR251744_ST1	Sequence data + in-house assembly	100	58	149188	436151	4125226	0.2855	0	0	0	ST1
ERR251747_ST1	Sequence data + in-house assembly	94	58	134233	391398	4126948	0.2855	0	0	0	ST1
ERR251751_ST1	Sequence data + in-house assembly	97	60	147167	310672	4149673	0.2861	0	0	0	ST1
ERR251756_ST1	Sequence data + in-house assembly	101	67	147047	424997	4122931	0.285	0	0	0	ST1
ERR251757_ST1	Sequence data + in-house assembly	95	72	134594	310157	4122587	0.2851	0	0	0	ST1
ERR251758_ST1	Sequence data + in-house assembly	100	63	134594	309946	4119815	0.285	0	0	0	ST1
ERR251767_ST1	Sequence data + in-house assembly	169	69	134594	309826	4131487	0.2857	0	0	0	ST1
ERR251768_ST1	Sequence data + in-house assembly	92	61	219590	424810	4117515	0.285	0	0	0	ST1
ERR251770_ST1	Sequence data + in-house assembly	91	63	218756	468671	4114680	0.285	0	0	0	ST1
ERR251775_ST1	Sequence data + in-house assembly	104	65	146591	310717	4128031	0.2856	0	0	0	ST1
ERR251776_ST1	Sequence data + in-house assembly	90	63	219637	436276	4131369	0.2855	0	0	0	ST1
ERR251785_ST1	Sequence data + in-house assembly	106	76	134600	310672	4130510	0.2855	0	0	0	ST1
ERR251790_ST1	Sequence data + in-house assembly	103	64	134618	254379	4084348	0.2845	0	0	0	ST1
ERR251791_ST1	Sequence data + in-house assembly	95	67	142027	285046	4051351	0.2836	0	0	0	ST1
ERR251805_ST1	Sequence data + in-house assembly	92	66	134594	297726	4114380	0.285	0	0	0	ST1
ERR251823_ST1	Sequence data + in-house assembly	89	58	147585	425174	4118296	0.285	0	0	0	ST1
ERR251829_ST1	Sequence data + in-house assembly	336	201	123772	408222	4463945	0.2868	0	0	0	ST1
ERR251831_ST1	Sequence data + in-house assembly	328	229	129037	408400	4661121	0.2865	0	0	0	ST1
ERR251834_ST1	Sequence data + in-house assembly	291	203	116051	310040	4446388	0.2866	0	0	0	ST1
ERR251841_ST1	Sequence data + in-house assembly	81	62	170482	425200	4116621	0.2849	0	0	0	ST1
ERR251857_ST1	Sequence data + in-house assembly	89	55	147205	409192	4120988	0.285	0	0	0	ST1
ERR251864_ST1	Sequence data + in-house assembly	85	61	219428	425276	4115337	0.285	0	0	0	ST1
ERR251867_ST1	Sequence data + in-house assembly	249	112	149775	436380	4253857	0.2857	0	0	0	ST1
ERR277253_ST1	Sequence data + in-house assembly	163	84	106865	257625	4122836	0.2852	0	0	0	ST1
ERR277254_ST1	Sequence data + in-house assembly	126	63	146795	289580	4111886	0.2848	0	0	0	ST1
ERR277256_ST1	Sequence data + in-house assembly	118	70	118966	276797	4101319	0.2847	0	0	0	ST1
ERR277258_ST1	Sequence data + in-house assembly	149	71	115337	276797	4124002	0.2852	1	0	0	ST1
ERR277259_ST1	Sequence data + in-house assembly	114	67	141228	424688	4108345	0.2847	0	0	0	ST1
ERR277260_ST1	Sequence data + in-house assembly	117	69	114992	309896	4103177	0.2846	0	0	0	ST1
ERR277262_ST1	Sequence data + in-house assembly	135	93	91939	240812	4098904	0.2847	0	0	0	ST1
ERR277264_ST1	Sequence data + in-house assembly	139	76	119190	276797	4126374	0.2854	0	0	0	ST1
ERR277271_ST1	Sequence data + in-house assembly	133	65	134325	305038	4114741	0.2848	0	0	0	ST1
ERR339502_ST1	Sequence data + in-house assembly	121	66	128995	309826	4102695	0.2847	0	0	0	ST1
ERR339517_ST1	Sequence data + in-house assembly	295	188	42323	161655	4120334	0.2857	0	0	0	ST1
ERR339518_ST1	Sequence data + in-house assembly	411	145	83088	195846	4187706	0.2859	0	0	0	ST1
ERR339520_ST1	Sequence data + in-house assembly	191	133	62424	177512	4116812	0.2853	0	0	0	ST1
ERR339521_ST1	Sequence data + in-house assembly	239	187	43621	134594	4106058	0.2852	0	0	0	ST1
ERR339523_ST1	Sequence data + in-house assembly	124	91	107695	299263	4112949	0.285	0	0	0	ST1
ERR339525_ST1	Sequence data + in-house assembly	126	86	107702	276797	4110586	0.2849	0	0	0	ST1
ERR339526_ST1	Sequence data + in-house assembly	317	194	43372	131473	4129789	0.2857	0	0	0	ST1
ERR339527_ST1	Sequence data + in-house assembly	191	141	57391	248651	4125555	0.2857	0	0	0	ST1
ERR339528_ST1	Sequence data + in-house assembly	146	100	90593	289220	4123944	0.2856	0	0	0	ST1
ERR339529_ST1	Sequence data + in-house assembly	131	82	97740	254309	4107968	0.285	0	0	0	ST1
ERR339530_ST1	Sequence data + in-house assembly	200	164	51962	150614	4111037	0.2852	0	0	0	ST1
ERR339535_ST1	Sequence data + in-house assembly	161	106	92723	289220	4122689	0.2855	1	0	0	ST1
ERR339538_ST1	Sequence data + in-house assembly	206	154	54859	155745	4109006	0.285	0	0	0	ST1
ERR339539_ST1	Sequence data + in-house assembly	159	122	78272	220821	4110118	0.285	0	0	0	ST1
ERR339670_ST1	Sequence data + in-house assembly	84	59	218572	470405	4111706	0.2849	0	0	0	ST1
ERR339674_ST1	Sequence data + in-house assembly	119	81	99508	257447	4126522	0.2855	0	0	0	ST1
ERR339676_ST1	Sequence data + in-house assembly	164	120	91250	220758	4121248	0.2852	0	0	0	ST1
ERR339680_ST1	Sequence data + in-house assembly	114	77	107696	392899	4129414	0.2855	0	0	0	ST1
ERR339684_ST1	Sequence data + in-house assembly	149	95	93188	274326	4117468	0.285	0	0	0	ST1
ERR339688_ST1	Sequence data + in-house assembly	104	77	114415	262021	4117871	0.2849	0	0	0	ST1
ERR339699_ST1	Sequence data + in-house assembly	159	114	81347	220819	4113494	0.2851	0	0	0	ST1
ERR339702_ST1	Sequence data + in-house assembly	116	77	114941	310308	4130820	0.2856	0	0	0	ST1
ERR339709_ST1	Sequence data + in-house assembly	182	84	118458	310363	4142380	0.2856	0	0	0	ST1
ERR339711_ST1	Sequence data + in-house assembly	155	110	94967	280738	4123893	0.2851	0	0	0	ST1
ERR339713_ST1	Sequence data + in-house assembly	216	153	55842	172390	4118764	0.2851	0	0	0	ST1
ERR339714_ST1	Sequence data + in-house assembly	205	125	72771	177736	4131985	0.285	0	0	0	ST1
ERR339715_ST1	Sequence data + in-house assembly	135	94	106224	245022	4112682	0.2851	1	0	0	ST1
ERR339749_ST1	Sequence data + in-house assembly	108	75	141578	308530	4126027	0.2854	0	0	0	ST1
ERR339750_ST1	Sequence data + in-house assembly	94	73	146969	310063	4121078	0.2851	0	0	0	ST1
ERR339751_ST1	Sequence data + in-house assembly	107	68	115348	425308	4116242	0.285	0	0	0	ST1
ERR339752_ST1	Sequence data + in-house assembly	104	65	141538	310211	4118380	0.285	0	0	0	ST1
ERR339753_ST1	Sequence data + in-house assembly	89	58	147293	310737	4131099	0.2855	0	0	0	ST1
ERR339754_ST1	Sequence data + in-house assembly	92	60	218206	425414	4114874	0.285	0	0	0	ST1
ERR339755_ST1	Sequence data + in-house assembly	103	70	134618	310731	4130504	0.2856	0	0	0	ST1
ERR339756_ST1	Sequence data + in-house assembly	94	59	147117	310661	4125076	0.2856	0	0	0	ST1
ERR339757_ST1	Sequence data + in-house assembly	116	76	129115	299409	4115033	0.285	0	0	0	ST1
ERR339758_ST1	Sequence data + in-house assembly	103	67	141377	370625	4113581	0.285	0	0	0	ST1
ERR339759_ST1	Sequence data + in-house assembly	101	73	141447	310227	4119520	0.2849	0	0	0	ST1
ERR339760_ST1	Sequence data + in-house assembly	99	68	134594	299339	4117176	0.285	0	0	0	ST1
ERR339762_ST1	Sequence data + in-house assembly	90	60	218622	424862	4115130	0.2849	0	0	0	ST1
ERR339763_ST1	Sequence data + in-house assembly	124	72	125932	310596	4124785	0.2855	0	0	0	ST1
ERR339764_ST1	Sequence data + in-house assembly	174	118	71689	177747	4111865	0.2851	0	0	0	ST1
ERR339765_ST1	Sequence data + in-house assembly	157	102	96496	265250	4115775	0.2851	2	0	0	ST1
ERR339767_ST1	Sequence data + in-house assembly	178	86	115613	310618	4142373	0.2866	1	0	0	ST1
ERR339768_ST1	Sequence data + in-house assembly	133	76	115109	309943	4118304	0.2851	4	0	0	ST1
ERR339769_ST1	Sequence data + in-house assembly	357	117	115304	272853	4204228	0.2867	2	0	0	ST1
ERR339770_ST1	Sequence data + in-house assembly	105	74	134594	310037	4114748	0.285	0	0	0	ST1
ERR339772_ST1	Sequence data + in-house assembly	137	77	123133	311236	4127656	0.2853	0	0	0	ST1
ERR339773_ST1	Sequence data + in-house assembly	116	78	134624	289220	4125211	0.2857	0	0	0	ST1
ERR339774_ST1	Sequence data + in-house assembly	111	67	141716	299198	4112287	0.2849	0	0	0	ST1
ERR339776_ST1	Sequence data + in-house assembly	140	65	141066	310181	4131499	0.2861	0	0	0	ST1
ERR339777_ST1	Sequence data + in-house assembly	111	74	125581	299085	4111921	0.2849	0	0	0	ST1
ERR339779_ST1	Sequence data + in-house assembly	141	84	114794	296535	4112610	0.285	0	0	0	ST1
ERR339780_ST1	Sequence data + in-house assembly	160	110	85258	228911	4110830	0.2851	0	0	0	ST1
ERR339781_ST1	Sequence data + in-house assembly	122	63	128894	299085	4110384	0.285	0	0	0	ST1
ERR339782_ST1	Sequence data + in-house assembly	108	69	134594	309958	4113312	0.285	1	0	0	ST1
ERR339783_ST1	Sequence data + in-house assembly	112	69	134594	309959	4113469	0.285	0	0	0	ST1
ERR339784_ST1	Sequence data + in-house assembly	131	88	100951	246611	4110323	0.285	0	0	0	ST1
ERR339786_ST1	Sequence data + in-house assembly	111	70	141296	310595	4123084	0.2855	0	0	0	ST1
ERR339787_ST1	Sequence data + in-house assembly	127	81	107750	299099	4111542	0.2849	0	0	0	ST1
ERR339790_ST1	Sequence data + in-house assembly	158	111	78068	246698	4112059	0.2851	0	0	0	ST1
ERR339791_ST1	Sequence data + in-house assembly	180	122	64906	165917	4110806	0.285	0	0	0	ST1
ERR339792_ST1	Sequence data + in-house assembly	130	64	146591	289441	4102881	0.2851	0	0	0	ST1
ERR339793_ST1	Sequence data + in-house assembly	110	72	128866	305612	4115625	0.2849	0	0	0	ST1
ERR339794_ST1	Sequence data + in-house assembly	131	79	98104	299013	4109628	0.285	0	0	0	ST1
ERR339795_ST1	Sequence data + in-house assembly	123	80	115151	318306	4098327	0.2852	0	0	0	ST1
ERR339797_ST1	Sequence data + in-house assembly	148	78	114582	299333	4120162	0.2852	0	0	0	ST1
ERR339798_ST1	Sequence data + in-house assembly	202	121	78293	160019	4118193	0.2859	0	0	0	ST1
ERR339800_ST1	Sequence data + in-house assembly	225	119	95932	297650	4132821	0.2854	0	0	0	ST1
ERR339826_ST1	Sequence data + in-house assembly	103	68	143250	299384	4116848	0.2849	0	0	0	ST1
ERR339827_ST1	Sequence data + in-house assembly	109	72	146819	425104	4119150	0.285	2	0	0	ST1
ERR339828_ST1	Sequence data + in-house assembly	109	72	128952	299263	4116687	0.2849	0	0	0	ST1
ERR339829_ST1	Sequence data + in-house assembly	106	73	134594	310731	4206454	0.2849	0	0	0	ST1
ERR339830_ST1	Sequence data + in-house assembly	95	63	141287	366736	4088693	0.2844	0	0	0	ST1
ERR339831_ST1	Sequence data + in-house assembly	114	83	107750	318379	4110897	0.2851	0	0	0	ST1
ERR339832_ST1	Sequence data + in-house assembly	119	80	109022	297670	4112956	0.285	0	0	0	ST1
ERR339833_ST1	Sequence data + in-house assembly	118	86	107730	299468	4111118	0.285	0	0	0	ST1
ERR339834_ST1	Sequence data + in-house assembly	127	87	106331	299544	4110496	0.2851	0	0	0	ST1
ERR339835_ST1	Sequence data + in-house assembly	135	93	114614	258191	4113243	0.2851	0	0	0	ST1
ERR339836_ST1	Sequence data + in-house assembly	87	61	218970	436352	4126864	0.2855	0	0	0	ST1
ERR339837_ST1	Sequence data + in-house assembly	101	71	141886	299454	4114521	0.285	0	0	0	ST1
ERR339838_ST1	Sequence data + in-house assembly	111	84	128894	272791	4117404	0.2851	0	0	0	ST1
ERR339839_ST1	Sequence data + in-house assembly	107	68	128798	310807	4127300	0.2855	0	0	0	ST1
ERR339840_ST1	Sequence data + in-house assembly	111	78	125689	299474	4112754	0.2849	0	0	0	ST1
ERR339841_ST1	Sequence data + in-house assembly	120	82	107937	299468	4116413	0.285	0	0	0	ST1
ERR339842_ST1	Sequence data + in-house assembly	112	67	128995	299339	4115541	0.285	0	0	0	ST1
ERR339843_ST1	Sequence data + in-house assembly	128	90	93103	230683	4199393	0.285	0	0	0	ST1
ERR339844_ST1	Sequence data + in-house assembly	162	116	79761	221971	4111250	0.2851	0	0	0	ST1
ERR339845_ST1	Sequence data + in-house assembly	114	81	115777	310737	4125515	0.2856	0	0	0	ST1
ERR339846_ST1	Sequence data + in-house assembly	116	81	114991	325642	4132353	0.2858	0	0	0	ST1
ERR339847_ST1	Sequence data + in-house assembly	112	76	114941	276797	4131144	0.2857	0	0	0	ST1
ERR339848_ST1	Sequence data + in-house assembly	86	63	146898	436132	4130914	0.2855	0	0	0	ST1
ERR339849_ST1	Sequence data + in-house assembly	138	78	115704	299544	4127935	0.285	0	0	0	ST1
ERR339850_ST1	Sequence data + in-house assembly	105	67	128952	299333	4112224	0.2849	0	0	0	ST1
ERR339851_ST1	Sequence data + in-house assembly	470	80	115304	354026	4231250	0.2888	0	0	0	ST1
ERR339852_ST1	Sequence data + in-house assembly	113	67	140973	425932	4116759	0.2851	0	0	0	ST1
ERR339853_ST1	Sequence data + in-house assembly	113	85	115211	424877	4119996	0.285	0	0	0	ST1
ERR339854_ST1	Sequence data + in-house assembly	105	62	143262	425230	4116974	0.2851	1	0	0	ST1
ERR339855_ST1	Sequence data + in-house assembly	104	70	128866	424777	4117855	0.2849	0	0	0	ST1
ERR339856_ST1	Sequence data + in-house assembly	99	70	141066	353962	4114821	0.285	0	0	0	ST1
ERR339857_ST1	Sequence data + in-house assembly	96	62	146861	425334	4113998	0.285	0	0	0	ST1
ERR339858_ST1	Sequence data + in-house assembly	110	71	134593	299317	4115020	0.285	0	0	0	ST1
ERR339859_ST1	Sequence data + in-house assembly	133	64	146591	436071	4136510	0.2864	0	0	0	ST1
ERR339860_ST1	Sequence data + in-house assembly	104	67	141675	310797	4126535	0.2855	0	0	0	ST1
ERR339861_ST1	Sequence data + in-house assembly	147	83	112861	310250	4125191	0.2856	0	0	0	ST1
ERR339862_ST1	Sequence data + in-house assembly	102	74	134594	325652	4112489	0.285	0	0	0	ST1
ERR339863_ST1	Sequence data + in-house assembly	103	66	218778	470318	4118743	0.2849	0	0	0	ST1
ERR339864_ST1	Sequence data + in-house assembly	352	93	134594	309942	4224881	0.2897	0	0	0	ST1
ERR339865_ST1	Sequence data + in-house assembly	99	68	134605	368146	4061940	0.2836	0	0	0	ST1
ERR339866_ST1	Sequence data + in-house assembly	104	75	115226	299544	4114740	0.2849	0	0	0	ST1
ERR339867_ST1	Sequence data + in-house assembly	149	104	92340	257458	4125804	0.2856	0	0	0	ST1
ERR339868_ST1	Sequence data + in-house assembly	108	74	141527	329749	4131947	0.2855	0	0	0	ST1
ERR339869_ST1	Sequence data + in-house assembly	116	76	107709	310737	4124861	0.2855	0	0	0	ST1
ERR339870_ST1	Sequence data + in-house assembly	98	68	147463	436267	4127125	0.2855	0	0	0	ST1
ERR339871_ST1	Sequence data + in-house assembly	110	62	149808	425359	4117110	0.285	0	0	0	ST1
ERR339872_ST1	Sequence data + in-house assembly	108	74	128995	299544	4115773	0.285	0	0	0	ST1
ERR339873_ST1	Sequence data + in-house assembly	107	78	129008	389470	4120787	0.2849	0	0	0	ST1
ERR339874_ST1	Sequence data + in-house assembly	100	66	141616	309993	4116893	0.2849	0	0	0	ST1
ERR339875_ST1	Sequence data + in-house assembly	88	61	141743	310601	4130242	0.2855	0	0	0	ST1
ERR339876_ST1	Sequence data + in-house assembly	73	58	134594	424845	4110728	0.2849	0	0	0	ST1
ERR339877_ST1	Sequence data + in-house assembly	135	101	96181	220942	4111209	0.285	0	0	0	ST1
ERR339878_ST1	Sequence data + in-house assembly	109	83	101840	310737	4126855	0.2856	0	0	0	ST1
ERR339879_ST1	Sequence data + in-house assembly	100	67	143287	425072	4114435	0.285	0	0	0	ST1
ERR339880_ST1	Sequence data + in-house assembly	106	75	141376	299474	4114588	0.2849	0	0	0	ST1
ERR339881_ST1	Sequence data + in-house assembly	82	62	219345	425184	4118902	0.285	0	0	0	ST1
ERR339882_ST1	Sequence data + in-house assembly	90	66	146819	436586	4129842	0.2855	0	0	0	ST1
ERR339883_ST1	Sequence data + in-house assembly	99	68	141132	424928	4113716	0.2849	0	0	0	ST1
ERR339884_ST1	Sequence data + in-house assembly	96	66	143265	425492	4115662	0.2849	0	0	0	ST1
ERR339885_ST1	Sequence data + in-house assembly	105	69	128995	310063	4113340	0.285	0	0	0	ST1
ERR339886_ST1	Sequence data + in-house assembly	105	70	125175	310833	4127226	0.2855	0	0	0	ST1
ERR339887_ST1	Sequence data + in-house assembly	114	81	114367	425006	4112008	0.2849	1	0	0	ST1
ERR339888_ST1	Sequence data + in-house assembly	95	64	134594	299296	4116045	0.2849	0	0	0	ST1
ERR339889_ST1	Sequence data + in-house assembly	100	69	128951	276797	4128723	0.2854	0	0	0	ST1
ERR339890_ST1	Sequence data + in-house assembly	91	62	146851	405996	4112877	0.285	0	0	0	ST1
ERR339891_ST1	Sequence data + in-house assembly	116	80	99946	299544	4112176	0.285	0	0	0	ST1
ERR339892_ST1	Sequence data + in-house assembly	99	73	123571	425075	4110266	0.2849	0	0	0	ST1
ERR339893_ST1	Sequence data + in-house assembly	126	81	114271	323342	4112158	0.285	0	0	0	ST1
ERR339894_ST1	Sequence data + in-house assembly	93	62	219061	436748	4123552	0.2855	0	0	0	ST1
ERR339895_ST1	Sequence data + in-house assembly	104	70	134594	309993	4114463	0.2849	0	0	0	ST1
ERR339896_ST1	Sequence data + in-house assembly	101	69	128995	309996	4113219	0.2849	0	0	0	ST1
ERR339897_ST1	Sequence data + in-house assembly	99	66	146819	310509	4121035	0.2849	0	0	0	ST1
ERR339898_ST1	Sequence data + in-house assembly	97	62	147131	310037	4116014	0.285	0	0	0	ST1
ERR339899_ST1	Sequence data + in-house assembly	108	72	123601	255563	4055786	0.2836	0	0	0	ST1
ERR339900_ST1	Sequence data + in-house assembly	99	73	143301	425243	4120653	0.2849	0	0	0	ST1
ERR339901_ST1	Sequence data + in-house assembly	93	69	147463	425006	4119494	0.2849	0	0	0	ST1
ERR339902_ST1	Sequence data + in-house assembly	100	65	141571	299610	4115208	0.2849	0	0	0	ST1
ERR339903_ST1	Sequence data + in-house assembly	104	68	146591	370555	4114596	0.2849	0	0	0	ST1
ERR339904_ST1	Sequence data + in-house assembly	105	67	146903	309996	4115981	0.285	1	0	0	ST1
ERR339905_ST1	Sequence data + in-house assembly	101	69	141066	425004	4118700	0.2849	0	0	0	ST1
ERR339906_ST1	Sequence data + in-house assembly	94	60	149494	425681	4115767	0.285	0	0	0	ST1
ERR339907_ST1	Sequence data + in-house assembly	94	64	143265	299210	4115193	0.2849	0	0	0	ST1
ERR339908_ST1	Sequence data + in-house assembly	107	72	134600	309958	4118984	0.285	0	0	0	ST1
ERR339909_ST1	Sequence data + in-house assembly	96	65	149498	424945	4112486	0.2849	0	0	0	ST1
ERR339910_ST1	Sequence data + in-house assembly	92	61	141294	309996	4113506	0.2849	0	0	0	ST1
ERR339911_ST1	Sequence data + in-house assembly	102	64	146832	424869	4113282	0.2849	0	0	0	ST1
ERR339912_ST1	Sequence data + in-house assembly	91	60	218327	425343	4118039	0.2849	0	0	0	ST1
ERR339913_ST1	Sequence data + in-house assembly	99	71	139770	353681	4116792	0.2849	0	0	0	ST1
ERR339914_ST1	Sequence data + in-house assembly	92	61	147955	424997	4116815	0.2849	0	0	0	ST1
ERR339915_ST1	Sequence data + in-house assembly	75	56	147572	309996	4117069	0.2849	1	0	0	ST1
ERR339916_ST1	Sequence data + in-house assembly	87	60	146819	425106	4115329	0.285	0	0	0	ST1
ERR339917_ST1	Sequence data + in-house assembly	97	64	147047	424687	4114884	0.285	0	0	0	ST1
ERR339918_ST1	Sequence data + in-house assembly	87	59	219038	425250	4116612	0.2851	0	0	0	ST1
ERR339919_ST1	Sequence data + in-house assembly	95	65	140402	308615	4117854	0.2849	0	0	0	ST1
ERR339920_ST1	Sequence data + in-house assembly	186	89	149420	424680	4156054	0.285	0	0	0	ST1
ERR339921_ST1	Sequence data + in-house assembly	90	64	146819	299409	4113326	0.2849	0	0	0	ST1
ERR339922_ST1	Sequence data + in-house assembly	94	63	141611	310056	4125315	0.2855	0	0	0	ST1
ERR339923_ST1	Sequence data + in-house assembly	92	57	218885	425282	4121872	0.285	0	0	0	ST1
ERR339924_ST1	Sequence data + in-house assembly	88	61	141447	309946	4112811	0.2849	0	0	0	ST1
ERR339925_ST1	Sequence data + in-house assembly	117	75	149285	309943	4130332	0.2848	0	0	0	ST1
ERR339926_ST1	Sequence data + in-house assembly	97	62	141421	309825	4109165	0.2849	0	0	0	ST1
ERR339927_ST1	Sequence data + in-house assembly	110	66	128849	310037	4113089	0.285	0	0	0	ST1
ERR339928_ST1	Sequence data + in-house assembly	97	61	146846	310873	4124240	0.2855	0	0	0	ST1
ERR339929_ST1	Sequence data + in-house assembly	94	65	141066	310090	4112277	0.2849	0	0	0	ST1
ERR339930_ST1	Sequence data + in-house assembly	100	60	141066	310774	4123127	0.2855	0	0	0	ST1
ERR339931_ST1	Sequence data + in-house assembly	108	64	134594	424695	4115241	0.285	0	0	0	ST1
ERR339932_ST1	Sequence data + in-house assembly	93	54	218697	468619	4124724	0.2855	0	0	0	ST1
ERR339933_ST1	Sequence data + in-house assembly	96	65	141662	324615	4140883	0.2856	0	0	0	ST1
ERR339934_ST1	Sequence data + in-house assembly	100	56	149585	425108	4112268	0.2849	0	0	0	ST1
ERR339935_ST1	Sequence data + in-house assembly	94	60	142245	309942	4113182	0.2849	0	0	0	ST1
ERR339936_ST1	Sequence data + in-house assembly	87	59	219581	424862	4117117	0.2851	0	0	0	ST1
ERR339937_ST1	Sequence data + in-house assembly	93	58	146832	310909	4124978	0.2855	0	0	0	ST1
ERR339938_ST1	Sequence data + in-house assembly	94	59	149188	436327	4121866	0.2855	0	0	0	ST1
ERR339939_ST1	Sequence data + in-house assembly	97	66	146591	376392	4125964	0.2855	0	0	0	ST1
ERR339941_ST1	Sequence data + in-house assembly	90	57	147117	426263	4121457	0.2849	0	0	0	ST1
ERR339942_ST1	Sequence data + in-house assembly	110	81	107851	299333	4111323	0.2849	0	0	0	ST1
ERR339943_ST1	Sequence data + in-house assembly	98	61	147709	424937	4120200	0.2852	0	0	0	ST1
ERR339944_ST1	Sequence data + in-house assembly	92	64	141193	302941	4117185	0.2851	0	0	0	ST1
ERR339945_ST1	Sequence data + in-house assembly	101	66	149602	425340	4115874	0.2849	0	0	0	ST1
ERR339946_ST1	Sequence data + in-house assembly	316	70	140973	425345	4180981	0.2856	0	0	0	ST1
ERR339947_ST1	Sequence data + in-house assembly	209	95	134594	310909	4180259	0.2853	0	0	0	ST1
ERR339948_ST1	Sequence data + in-house assembly	97	66	146832	424919	4119906	0.2849	0	0	0	ST1
ERR339949_ST1	Sequence data + in-house assembly	102	65	146776	309993	4117234	0.2851	0	0	0	ST1
ERR339950_ST1	Sequence data + in-house assembly	80	57	183309	425083	4114242	0.2848	0	0	0	ST1
ERR339951_ST1	Sequence data + in-house assembly	98	60	218309	425006	4116375	0.285	0	0	0	ST1
ERR339952_ST1	Sequence data + in-house assembly	92	64	146832	309916	4117560	0.2849	0	0	0	ST1
ERR339953_ST1	Sequence data + in-house assembly	105	68	141463	425141	4116423	0.285	0	0	0	ST1
ERR339954_ST1	Sequence data + in-house assembly	105	71	128950	310926	4123378	0.285	0	0	0	ST1
ERR339955_ST1	Sequence data + in-house assembly	103	64	141414	299441	4118555	0.2849	0	0	0	ST1
ERR339956_ST1	Sequence data + in-house assembly	281	155	128995	310062	4490557	0.2845	0	0	0	ST1
ERR339957_ST1	Sequence data + in-house assembly	83	61	147131	310602	4127066	0.2855	0	0	0	ST1
ERR340071_ST1	Sequence data + in-house assembly	619	501	14893	71574	4141684	0.2867	0	0	0	ST1
ERR340076_ST1	Sequence data + in-house assembly	453	421	19099	78541	4074884	0.2859	0	0	0	ST1
ERR340077_ST1	Sequence data + in-house assembly	851	777	7967	71737	4035719	0.2873	0	0	0	ST1
ERR340078_ST1	Sequence data + in-house assembly	937	849	7544	71516	4023341	0.2875	0	0	0	ST1
ERR340113_ST1	Sequence data + in-house assembly	87	61	167044	299485	4122609	0.2849	1	0	0	ST1
ERR340127_ST1	Sequence data + in-house assembly	84	61	147910	354343	4115557	0.2849	1	0	0	ST1
ERR340131_ST1	Sequence data + in-house assembly	85	55	219157	425174	4117007	0.285	0	0	0	ST1
ERR340147_ST1	Sequence data + in-house assembly	99	75	129037	257619	4109662	0.285	0	0	0	ST1
ERR340181_ST1	Sequence data + in-house assembly	89	69	129345	318433	4113179	0.2849	0	0	0	ST1
ERR340288_ST1	Sequence data + in-house assembly	85	58	141369	311281	4122301	0.2853	0	0	0	ST1
ERR340290_ST1	Sequence data + in-house assembly	71	55	218754	425647	4107515	0.2847	1	0	0	ST1
ERR340302_ST1	Sequence data + in-house assembly	79	59	219838	471952	4118124	0.285	0	0	0	ST1
ERR340303_ST1	Sequence data + in-house assembly	80	59	146861	299485	4115924	0.285	0	0	0	ST1
ERR340304_ST1	Sequence data + in-house assembly	104	71	129821	425215	4114194	0.2849	0	0	0	ST1
ERR340305_ST1	Sequence data + in-house assembly	78	56	174191	425603	4117264	0.2849	0	0	0	ST1
ERR347491_ST1	Sequence data + in-house assembly	130	74	147361	408065	4134761	0.2849	0	0	0	ST1
ERR347508_ST1	Sequence data + in-house assembly	101	63	218960	425174	4130133	0.2849	0	0	0	ST1
ERR347535_ST1	Sequence data + in-house assembly	130	83	141186	367166	4176416	0.2836	0	0	0	ST1
ERR347577_ST1	Sequence data + in-house assembly	78	57	141850	408322	4107007	0.2847	0	0	0	ST1
ERR347578_ST1	Sequence data + in-house assembly	78	55	166771	425222	4108950	0.2848	0	0	0	ST1
ERR347579_ST1	Sequence data + in-house assembly	68	55	149775	408561	4119787	0.2855	0	0	0	ST1
ERR347580_ST1	Sequence data + in-house assembly	76	59	172186	424980	4114816	0.285	0	0	0	ST1
ERR347581_ST1	Sequence data + in-house assembly	71	57	166946	425649	4200301	0.2874	0	0	0	ST1
ERR347583_ST1	Sequence data + in-house assembly	78	59	166979	425421	4115021	0.2849	0	0	0	ST1
ERR347584_ST1	Sequence data + in-house assembly	60	48	219493	425015	4113548	0.285	0	0	0	ST1
ERR347586_ST1	Sequence data + in-house assembly	85	55	219383	425241	4199414	0.2874	0	0	0	ST1
ERR347588_ST1	Sequence data + in-house assembly	75	54	218695	425328	4117198	0.2849	0	0	0	ST1
ERR347589_ST1	Sequence data + in-house assembly	70	51	219272	425385	4114503	0.285	0	0	0	ST1
ERR347590_ST1	Sequence data + in-house assembly	69	55	218879	425175	4111846	0.2849	0	0	0	ST1
ERR347591_ST1	Sequence data + in-house assembly	64	48	219858	425244	4107472	0.2849	0	0	0	ST1
ERR347593_ST1	Sequence data + in-house assembly	82	65	134621	303955	4147609	0.2858	0	0	0	ST1
ERR347594_ST1	Sequence data + in-house assembly	83	66	141100	325641	4177618	0.2876	0	0	0	ST1
ERR347596_ST1	Sequence data + in-house assembly	79	58	147205	425444	4197762	0.2875	0	0	0	ST1
ERR347598_ST1	Sequence data + in-house assembly	77	56	154798	354343	4148079	0.2858	0	0	0	ST1
ERR347599_ST1	Sequence data + in-house assembly	76	58	150021	407656	4125895	0.2856	0	0	0	ST1
ERR347601_ST1	Sequence data + in-house assembly	74	53	219640	425577	4118228	0.2849	0	0	0	ST1
ERR347602_ST1	Sequence data + in-house assembly	74	54	219589	425248	4196897	0.2874	1	0	0	ST1
ERR347603_ST1	Sequence data + in-house assembly	72	60	219923	425744	4116630	0.285	1	0	0	ST1
ERR347604_ST1	Sequence data + in-house assembly	76	55	174216	425225	4114600	0.2849	0	0	0	ST1
ERR347605_ST1	Sequence data + in-house assembly	76	58	172180	425335	4112108	0.2849	1	0	0	ST1
ERR347606_ST1	Sequence data + in-house assembly	73	59	166909	425490	4110904	0.2849	0	0	0	ST1
ERR347610_ST1	Sequence data + in-house assembly	86	64	134588	354343	4117558	0.285	0	0	0	ST1
ERR347611_ST1	Sequence data + in-house assembly	89	73	129030	304090	4146976	0.2858	0	0	0	ST1
ERR347612_ST1	Sequence data + in-house assembly	85	69	166954	426136	4114470	0.285	1	0	0	ST1
ERR347616_ST1	Sequence data + in-house assembly	101	81	96856	272849	4112263	0.285	0	0	0	ST1
ERR347617_ST1	Sequence data + in-house assembly	73	59	167247	425527	4113334	0.2849	0	0	0	ST1
ERR347621_ST1	Sequence data + in-house assembly	72	54	218835	425139	4112790	0.2849	3	0	0	ST1
ERR347622_ST1	Sequence data + in-house assembly	81	62	146861	408052	4115073	0.285	4	0	0	ST1
ERR347623_ST1	Sequence data + in-house assembly	80	62	134594	425281	4112477	0.2849	4	0	0	ST1
ERR347624_ST1	Sequence data + in-house assembly	81	67	122163	334078	4107971	0.285	5	0	0	ST1
ERR347625_ST1	Sequence data + in-house assembly	67	56	218799	425223	4112265	0.285	5	0	0	ST1
ERR347626_ST1	Sequence data + in-house assembly	79	61	134594	425123	4111361	0.285	3	0	0	ST1
ERR347627_ST1	Sequence data + in-house assembly	87	71	129037	328151	4111245	0.285	0	0	0	ST1
ERR347628_ST1	Sequence data + in-house assembly	87	66	134594	374308	4112547	0.2849	7	0	0	ST1
ERR347629_ST1	Sequence data + in-house assembly	67	52	166932	425796	4113235	0.285	1	0	0	ST1
ERR347630_ST1	Sequence data + in-house assembly	77	59	147000	425588	4115295	0.285	2	0	0	ST1
ERR347631_ST1	Sequence data + in-house assembly	91	77	115337	305342	4108593	0.285	5	0	0	ST1
ERR347632_ST1	Sequence data + in-house assembly	82	67	150367	299474	4112807	0.285	3	0	0	ST1
ERR347634_ST1	Sequence data + in-house assembly	76	60	129624	408785	4112505	0.285	2	0	0	ST1
ERR347635_ST1	Sequence data + in-house assembly	88	72	129152	328484	4114082	0.2849	5	0	0	ST1
ERR347636_ST1	Sequence data + in-house assembly	77	65	141442	299527	4108418	0.2849	3	0	0	ST1
ERR347637_ST1	Sequence data + in-house assembly	69	55	166733	425267	4110311	0.285	4	0	0	ST1
ERR347638_ST1	Sequence data + in-house assembly	86	60	149706	425360	4112071	0.2849	4	0	0	ST1
ERR347639_ST1	Sequence data + in-house assembly	85	65	141639	425000	4112676	0.285	1	0	0	ST1
ERR347640_ST1	Sequence data + in-house assembly	86	64	140973	425282	4113590	0.285	1	0	0	ST1
ERR347641_ST1	Sequence data + in-house assembly	67	53	218488	425267	4110234	0.2849	3	0	0	ST1
ERR347642_ST1	Sequence data + in-house assembly	100	78	112933	257491	4194656	0.2875	1	0	0	ST1
ERR347644_ST1	Sequence data + in-house assembly	120	91	97231	323315	4114822	0.285	3	0	0	ST1
ERR347645_ST1	Sequence data + in-house assembly	89	70	115629	318486	4110710	0.285	5	0	0	ST1
ERR347646_ST1	Sequence data + in-house assembly	86	65	143258	425387	4114477	0.285	0	0	0	ST1
ERR347647_ST1	Sequence data + in-house assembly	106	77	140973	425420	4102415	0.2852	2	0	0	ST1
ERR347648_ST1	Sequence data + in-house assembly	70	56	149800	299551	4113690	0.2849	1	0	0	ST1
ERR347649_ST1	Sequence data + in-house assembly	98	82	97203	240992	4109829	0.285	1	0	0	ST1
ERR347650_ST1	Sequence data + in-house assembly	94	77	112933	245008	4113765	0.285	5	0	0	ST1
ERR347651_ST1	Sequence data + in-house assembly	79	57	149685	408341	4114844	0.285	1	0	0	ST1
ERR347652_ST1	Sequence data + in-house assembly	89	70	134219	389110	4113361	0.285	2	0	0	ST1
ERR347653_ST1	Sequence data + in-house assembly	81	64	129152	310950	4114794	0.285	3	0	0	ST1
ERR347654_ST1	Sequence data + in-house assembly	120	103	91870	299549	4110809	0.285	3	0	0	ST1
ERR347655_ST1	Sequence data + in-house assembly	98	73	97633	299474	4111333	0.285	1	0	0	ST1
ERR347656_ST1	Sequence data + in-house assembly	96	82	112933	299544	4113784	0.285	4	0	0	ST1
ERR347657_ST1	Sequence data + in-house assembly	123	97	96654	272816	4114827	0.285	4	0	0	ST1
ERR347658_ST1	Sequence data + in-house assembly	102	81	96877	244986	4114149	0.2851	5	0	0	ST1
ERR347659_ST1	Sequence data + in-house assembly	86	68	141236	425287	4116498	0.285	2	0	0	ST1
ERR347660_ST1	Sequence data + in-house assembly	85	60	148574	425384	4111855	0.2849	2	0	0	ST1
ERR347661_ST1	Sequence data + in-house assembly	89	69	115538	318602	4111655	0.285	2	0	0	ST1
ERR347662_ST1	Sequence data + in-house assembly	80	62	141496	310308	4202410	0.2875	1	0	0	ST1
ERR347664_ST1	Sequence data + in-house assembly	87	72	134594	318640	4115009	0.285	5	0	0	ST1
ERR347665_ST1	Sequence data + in-house assembly	82	66	134594	425385	4118040	0.285	2	0	0	ST1
ERR347666_ST1	Sequence data + in-house assembly	89	69	125412	297727	4113858	0.285	4	0	0	ST1
ERR347667_ST1	Sequence data + in-house assembly	72	55	219176	425032	4118441	0.2849	5	0	0	ST1
ERR347668_ST1	Sequence data + in-house assembly	92	70	125254	310040	4115170	0.285	1	0	0	ST1
ERR347669_ST1	Sequence data + in-house assembly	80	64	147209	425541	4116112	0.285	5	0	0	ST1
ERR347670_ST1	Sequence data + in-house assembly	86	66	141689	299474	4118185	0.2849	0	0	0	ST1
ERR347671_ST1	Sequence data + in-house assembly	95	66	147180	407539	4109264	0.285	4	0	0	ST1
ERR347672_ST1	Sequence data + in-house assembly	94	71	127330	425014	4110772	0.2849	7	0	0	ST1
ERR347673_ST1	Sequence data + in-house assembly	83	57	149409	471206	4196696	0.2875	2	0	0	ST1
ERR347675_ST1	Sequence data + in-house assembly	80	60	147246	408055	4112628	0.285	1	0	0	ST1
ERR347676_ST1	Sequence data + in-house assembly	109	85	97742	299244	4114133	0.2849	4	0	0	ST1
ERR347677_ST1	Sequence data + in-house assembly	77	61	141329	354020	4117187	0.2849	2	0	0	ST1
ERR347678_ST1	Sequence data + in-house assembly	101	79	125137	299410	4118539	0.285	3	0	0	ST1
ERR347679_ST1	Sequence data + in-house assembly	86	61	147246	408258	4108790	0.2849	1	0	0	ST1
ERR347680_ST1	Sequence data + in-house assembly	72	57	147585	425583	4116434	0.2849	2	0	0	ST1
ERR347681_ST1	Sequence data + in-house assembly	82	60	139820	425619	4113297	0.285	3	0	0	ST1
ERR347682_ST1	Sequence data + in-house assembly	96	70	140973	425407	4118215	0.2849	1	0	0	ST1
ERR347683_ST1	Sequence data + in-house assembly	125	102	94055	272840	4112642	0.285	10	0	0	ST1
ERR347684_ST1	Sequence data + in-house assembly	117	91	106824	318649	4113422	0.285	5	0	0	ST1
ERR347685_ST1	Sequence data + in-house assembly	97	75	134594	299474	4193560	0.2875	2	0	0	ST1
ERR347686_ST1	Sequence data + in-house assembly	99	70	128995	297726	4113592	0.2849	2	0	0	ST1
ERR347687_ST1	Sequence data + in-house assembly	104	84	116090	299229	4111413	0.285	1	0	0	ST1
ERR347688_ST1	Sequence data + in-house assembly	77	59	141738	310230	4184159	0.285	5	0	0	ST1
ERR347689_ST1	Sequence data + in-house assembly	83	65	134618	354021	4057289	0.2837	2	0	0	ST1
ERR347690_ST1	Sequence data + in-house assembly	89	65	129115	354018	4116902	0.2849	2	0	0	ST1
ERR347691_ST1	Sequence data + in-house assembly	86	69	115259	299550	4113890	0.285	0	0	0	ST1
ERR347692_ST1	Sequence data + in-house assembly	96	82	115341	328483	4112068	0.285	3	0	0	ST1
ERR347693_ST1	Sequence data + in-house assembly	85	72	134600	354499	4116111	0.285	4	0	0	ST1
ERR347694_ST1	Sequence data + in-house assembly	123	98	94631	244995	4112945	0.285	4	0	0	ST1
ERR347695_ST1	Sequence data + in-house assembly	97	77	115270	376197	4145461	0.2857	2	0	0	ST1
ERR347696_ST1	Sequence data + in-house assembly	146	121	73527	272817	4105478	0.2851	2	0	0	ST1
ERR347697_ST1	Sequence data + in-house assembly	94	78	115179	276797	4111787	0.285	2	0	0	ST1
ERR347698_ST1	Sequence data + in-house assembly	108	85	108110	212117	4109986	0.285	6	0	0	ST1
ERR347699_ST1	Sequence data + in-house assembly	133	118	78829	220806	4108901	0.2851	4	0	0	ST1
ERR347700_ST1	Sequence data + in-house assembly	97	81	112742	312178	4109488	0.285	4	0	0	ST1
ERR347701_ST1	Sequence data + in-house assembly	92	71	114894	425549	4113151	0.285	0	0	0	ST1
ERR347702_ST1	Sequence data + in-house assembly	98	78	101100	329951	4115915	0.2855	1	0	0	ST1
ERR347703_ST1	Sequence data + in-house assembly	138	117	73134	172394	4112022	0.285	0	0	0	ST1
ERR347704_ST1	Sequence data + in-house assembly	90	76	129008	425079	4115424	0.285	4	0	0	ST1
ERR347705_ST1	Sequence data + in-house assembly	103	79	96704	318679	4110186	0.2851	1	0	0	ST1
ERR347706_ST1	Sequence data + in-house assembly	89	69	129624	325648	4113745	0.2849	0	0	0	ST1
ERR347707_ST1	Sequence data + in-house assembly	76	57	149405	425385	4113627	0.2849	0	0	0	ST1
ERR347708_ST1	Sequence data + in-house assembly	77	58	143285	425527	4114586	0.2849	0	0	0	ST1
ERR347710_ST1	Sequence data + in-house assembly	156	104	92976	276797	4125850	0.285	0	0	0	ST1
ERR347711_ST1	Sequence data + in-house assembly	105	82	115282	318447	4118249	0.285	0	0	0	ST1
ERR347712_ST1	Sequence data + in-house assembly	81	66	149553	425432	4111920	0.2849	0	0	0	ST1
ERR347713_ST1	Sequence data + in-house assembly	78	57	141236	425253	4114742	0.2849	0	0	0	ST1
ERR347714_ST1	Sequence data + in-house assembly	89	63	143990	425293	4115604	0.2849	0	0	0	ST1
ERR347716_ST1	Sequence data + in-house assembly	151	122	77661	220817	4107706	0.285	0	0	0	ST1
ERR347717_ST1	Sequence data + in-house assembly	97	78	135046	280726	4113883	0.2849	0	0	0	ST1
ERR347718_ST1	Sequence data + in-house assembly	72	56	149405	425174	4114763	0.2849	0	0	0	ST1
ERR347719_ST1	Sequence data + in-house assembly	119	88	112861	174161	4114244	0.2849	0	0	0	ST1
ERR347722_ST1	Sequence data + in-house assembly	90	61	142047	354344	4118366	0.285	0	0	0	ST1
ERR347723_ST1	Sequence data + in-house assembly	91	70	115498	299241	4109753	0.285	0	0	0	ST1
ERR347724_ST1	Sequence data + in-house assembly	77	57	220158	425335	4121994	0.2852	0	0	0	ST1
ERR347725_ST1	Sequence data + in-house assembly	96	73	122097	325647	4114252	0.285	0	0	0	ST1
ERR347728_ST1	Sequence data + in-house assembly	88	63	166498	325650	4117040	0.2849	0	0	0	ST1
ERR347729_ST1	Sequence data + in-house assembly	80	59	218710	425278	4114654	0.2849	0	0	0	ST1
ERR347730_ST1	Sequence data + in-house assembly	78	56	141583	299339	4107620	0.2849	0	0	0	ST1
ERR347731_ST1	Sequence data + in-house assembly	96	58	218672	763495	4122858	0.285	0	0	0	ST1
ERR347734_ST1	Sequence data + in-house assembly	81	61	141475	299339	4114900	0.2849	0	0	0	ST1
ERR347735_ST1	Sequence data + in-house assembly	106	77	112861	280781	4097767	0.2849	0	0	0	ST1
ERR347736_ST1	Sequence data + in-house assembly	90	69	128995	305669	4114192	0.2849	0	0	0	ST1
ERR347737_ST1	Sequence data + in-house assembly	96	71	134594	306233	4117082	0.2849	0	0	0	ST1
ERR347738_ST1	Sequence data + in-house assembly	106	85	96963	318545	4113186	0.285	0	0	0	ST1
ERR347740_ST1	Sequence data + in-house assembly	105	81	115282	233708	4115755	0.285	1	0	0	ST1
ERR347741_ST1	Sequence data + in-house assembly	114	100	94679	240927	4057820	0.2837	0	0	0	ST1
ERR347742_ST1	Sequence data + in-house assembly	101	73	134594	299213	4117154	0.285	0	0	0	ST1
ERR347743_ST1	Sequence data + in-house assembly	86	62	141503	325651	4116647	0.285	0	0	0	ST1
ERR347744_ST1	Sequence data + in-house assembly	86	66	115541	325650	4112781	0.2849	0	0	0	ST1
ERR347747_ST1	Sequence data + in-house assembly	70	56	147308	407809	4109915	0.285	0	0	0	ST1
ERR347748_ST1	Sequence data + in-house assembly	69	49	219212	436888	4123237	0.2856	0	0	0	ST1
ERR347749_ST1	Sequence data + in-house assembly	69	49	219313	425626	4113162	0.285	0	0	0	ST1
ERR347750_ST1	Sequence data + in-house assembly	76	58	172183	425005	4111342	0.2851	0	0	0	ST1
ERR347751_ST1	Sequence data + in-house assembly	67	53	150274	408410	4111362	0.285	0	0	0	ST1
ERR347752_ST1	Sequence data + in-house assembly	66	50	218574	425631	4111479	0.285	0	0	0	ST1
ERR347753_ST1	Sequence data + in-house assembly	72	53	219475	425518	4110688	0.285	0	0	0	ST1
ERR347754_ST1	Sequence data + in-house assembly	69	55	218954	425200	4111337	0.285	0	0	0	ST1
ERR347755_ST1	Sequence data + in-house assembly	69	51	219208	424776	4113473	0.285	0	0	0	ST1
ERR347756_ST1	Sequence data + in-house assembly	70	53	160708	425307	4110600	0.285	0	0	0	ST1
ERR347759_ST1	Sequence data + in-house assembly	77	59	147409	408004	4113035	0.2851	0	0	0	ST1
ERR347760_ST1	Sequence data + in-house assembly	78	57	141738	354018	4122784	0.2856	0	0	0	ST1
ERR347761_ST1	Sequence data + in-house assembly	68	51	150021	407650	4112688	0.285	0	0	0	ST1
ERR347762_ST1	Sequence data + in-house assembly	64	49	167343	425534	4113938	0.285	0	0	0	ST1
ERR347763_ST1	Sequence data + in-house assembly	70	56	147167	408410	4109286	0.2849	0	0	0	ST1
ERR347764_ST1	Sequence data + in-house assembly	80	57	219523	493111	4141476	0.2863	0	0	0	ST1
ERR347765_ST1	Sequence data + in-house assembly	64	49	230892	425734	4114847	0.2849	0	0	0	ST1
ERR347766_ST1	Sequence data + in-house assembly	70	51	219475	425808	4117004	0.2851	0	0	0	ST1
ERR347767_ST1	Sequence data + in-house assembly	67	57	147307	407806	4105737	0.2849	0	0	0	ST1
ERR347770_ST1	Sequence data + in-house assembly	73	53	149468	408249	4111575	0.285	0	0	0	ST1
ERR347771_ST1	Sequence data + in-house assembly	69	57	219486	425813	4110651	0.285	0	0	0	ST1
ERR347772_ST1	Sequence data + in-house assembly	67	54	187627	408442	4112477	0.285	0	0	0	ST1
ERR347773_ST1	Sequence data + in-house assembly	85	67	129152	407782	4111336	0.285	0	0	0	ST1
ERR347774_ST1	Sequence data + in-house assembly	86	71	125262	299184	4109763	0.285	0	0	0	ST1
ERR347775_ST1	Sequence data + in-house assembly	85	60	141785	407755	4113541	0.2851	0	0	0	ST1
ERR347776_ST1	Sequence data + in-house assembly	74	54	219481	425625	4114481	0.2851	0	0	0	ST1
ERR347777_ST1	Sequence data + in-house assembly	70	54	141998	408140	4113421	0.285	0	0	0	ST1
ERR347778_ST1	Sequence data + in-house assembly	73	51	219680	425323	4115252	0.285	0	0	0	ST1
ERR347780_ST1	Sequence data + in-house assembly	67	54	204169	425336	4111562	0.285	0	0	0	ST1
ERR347781_ST1	Sequence data + in-house assembly	63	51	219622	425850	4113305	0.2851	0	0	0	ST1
ERR347782_ST1	Sequence data + in-house assembly	68	50	219448	425319	4115333	0.285	0	0	0	ST1
ERR347783_ST1	Sequence data + in-house assembly	69	55	150109	407857	4112194	0.2851	0	0	0	ST1
ERR347784_ST1	Sequence data + in-house assembly	80	62	129152	299424	4110993	0.2851	0	0	0	ST1
ERR347785_ST1	Sequence data + in-house assembly	73	60	141382	425497	4112197	0.2849	0	0	0	ST1
ERR347786_ST1	Sequence data + in-house assembly	70	52	166912	425505	4109746	0.2851	0	0	0	ST1
ERR347787_ST1	Sequence data + in-house assembly	86	61	172172	425703	4114707	0.285	0	0	0	ST1
ERR347788_ST1	Sequence data + in-house assembly	76	58	134594	299544	4107394	0.285	0	0	0	ST1
ERR347789_ST1	Sequence data + in-house assembly	64	51	219456	425504	4112494	0.285	0	0	0	ST1
ERR347792_ST1	Sequence data + in-house assembly	69	53	218802	425253	4116884	0.285	0	0	0	ST1
ERR347793_ST1	Sequence data + in-house assembly	71	57	142185	407646	4115186	0.2851	0	0	0	ST1
ERR347794_ST1	Sequence data + in-house assembly	72	54	149923	408139	4112415	0.2851	0	0	0	ST1
ERR347795_ST1	Sequence data + in-house assembly	58	47	218914	425730	4111732	0.285	0	0	0	ST1
ERR347796_ST1	Sequence data + in-house assembly	70	58	147307	407877	4107062	0.285	0	0	0	ST1
ERR347797_ST1	Sequence data + in-house assembly	67	55	219350	425358	4113421	0.285	0	0	0	ST1
ERR347798_ST1	Sequence data + in-house assembly	79	57	167278	425328	4117315	0.2851	0	0	0	ST1
ERR347799_ST1	Sequence data + in-house assembly	76	58	141752	408176	4111645	0.285	0	0	0	ST1
ERR347800_ST1	Sequence data + in-house assembly	72	55	141830	408018	4108776	0.285	0	0	0	ST1
ERR347801_ST1	Sequence data + in-house assembly	72	55	172195	425281	4112960	0.285	0	0	0	ST1
ERR347804_ST1	Sequence data + in-house assembly	72	53	150066	408488	4111632	0.2851	0	0	0	ST1
ERR347805_ST1	Sequence data + in-house assembly	70	56	218797	425428	4111318	0.285	0	0	0	ST1
ERR347806_ST1	Sequence data + in-house assembly	70	57	218772	425603	4107000	0.2851	0	0	0	ST1
ERR347807_ST1	Sequence data + in-house assembly	74	59	147409	310094	4106784	0.285	0	0	0	ST1
ERR347808_ST1	Sequence data + in-house assembly	82	64	134594	407625	4106012	0.2849	0	0	0	ST1
ERR347809_ST1	Sequence data + in-house assembly	70	56	219550	436639	4123421	0.2856	0	0	0	ST1
ERR347810_ST1	Sequence data + in-house assembly	72	55	219141	425309	4109881	0.285	0	0	0	ST1
ERR347811_ST1	Sequence data + in-house assembly	69	59	147307	310208	4110192	0.285	0	0	0	ST1
ERR347812_ST1	Sequence data + in-house assembly	64	51	219611	425281	4110024	0.285	0	0	0	ST1
ERR347813_ST1	Sequence data + in-house assembly	77	53	218640	424911	4113299	0.2851	0	0	0	ST1
ERR347816_ST1	Sequence data + in-house assembly	68	55	150061	299621	4111032	0.285	0	0	0	ST1
ERR347817_ST1	Sequence data + in-house assembly	66	52	219028	425073	4112824	0.285	0	0	0	ST1
ERR347818_ST1	Sequence data + in-house assembly	76	57	147409	408414	4113800	0.285	0	0	0	ST1
ERR347819_ST1	Sequence data + in-house assembly	258	66	134532	309797	4117659	0.2851	0	0	0	ST1
ERR347820_ST1	Sequence data + in-house assembly	70	54	141728	407938	4108000	0.285	0	0	0	ST1
ERR347821_ST1	Sequence data + in-house assembly	72	50	218632	425699	4116266	0.285	0	0	0	ST1
ERR347822_ST1	Sequence data + in-house assembly	72	55	147283	408139	4115652	0.285	0	0	0	ST1
ERR347823_ST1	Sequence data + in-house assembly	68	49	166921	425456	4113438	0.285	0	0	0	ST1
ERR347824_ST1	Sequence data + in-house assembly	64	51	219640	425350	4114850	0.2851	0	0	0	ST1
ERR347825_ST1	Sequence data + in-house assembly	67	56	217882	425542	4107328	0.285	0	0	0	ST1
ERR347828_ST1	Sequence data + in-house assembly	77	56	147167	407959	4111606	0.285	0	0	0	ST1
ERR347829_ST1	Sequence data + in-house assembly	68	54	141784	354005	4107737	0.285	0	0	0	ST1
ERR347830_ST1	Sequence data + in-house assembly	65	52	219432	425357	4109852	0.285	0	0	0	ST1
ERR347831_ST1	Sequence data + in-house assembly	89	72	123485	299551	4108279	0.285	0	0	0	ST1
ERR347832_ST1	Sequence data + in-house assembly	93	69	112933	299550	4116260	0.2851	0	0	0	ST1
ERR347833_ST1	Sequence data + in-house assembly	76	58	134594	299333	4101289	0.285	0	0	0	ST1
ERR347834_ST1	Sequence data + in-house assembly	61	50	219550	425281	4114594	0.285	0	0	0	ST1
ERR347835_ST1	Sequence data + in-house assembly	68	56	149996	407939	4109700	0.285	0	0	0	ST1
ERR347929_ST1	Sequence data + in-house assembly	101	69	144783	436641	4129731	0.2856	1	0	0	ST1
ERR347930_ST1	Sequence data + in-house assembly	247	81	114582	299220	4146466	0.2877	1	0	0	ST1
ERR347931_ST1	Sequence data + in-house assembly	116	66	143277	299085	4114838	0.285	0	0	0	ST1
ERR347933_ST1	Sequence data + in-house assembly	146	91	94662	299220	4117802	0.2852	0	0	0	ST1
ERR347934_ST1	Sequence data + in-house assembly	144	99	104229	310618	4126073	0.2856	0	0	0	ST1
ERR347935_ST1	Sequence data + in-house assembly	246	171	46103	134600	4118113	0.2852	0	0	0	ST1
ERR347936_ST1	Sequence data + in-house assembly	104	72	141558	310506	4121333	0.285	0	0	0	ST1
ERR347947_ST1	Sequence data + in-house assembly	152	91	94859	299220	4111325	0.285	0	0	0	ST1
ERR347950_ST1	Sequence data + in-house assembly	134	73	134758	309958	4116617	0.2854	0	0	0	ST1
ERR347951_ST1	Sequence data + in-house assembly	185	138	70903	203203	4119821	0.2856	0	0	0	ST1
ERR347952_ST1	Sequence data + in-house assembly	237	113	93166	299234	4138344	0.2853	0	0	0	ST1
ERR347953_ST1	Sequence data + in-house assembly	196	138	62278	177779	4107170	0.2852	0	0	0	ST1
ERR347954_ST1	Sequence data + in-house assembly	172	103	94988	299175	4120490	0.2856	0	0	0	ST1
ERR347956_ST1	Sequence data + in-house assembly	84	65	167213	376251	4129961	0.284	0	0	0	ST1
ERR347957_ST1	Sequence data + in-house assembly	80	57	149775	299106	4112334	0.285	0	0	0	ST1
ERR347958_ST1	Sequence data + in-house assembly	93	70	115243	299108	4113009	0.2849	0	0	0	ST1
ERR347959_ST1	Sequence data + in-house assembly	99	79	115337	325665	4114785	0.2849	0	0	0	ST1
ERR347960_ST1	Sequence data + in-house assembly	71	54	169080	408012	4121857	0.2848	0	0	0	ST1
ERR347961_ST1	Sequence data + in-house assembly	81	59	134594	289353	4109967	0.2848	0	0	0	ST1
ERR347962_ST1	Sequence data + in-house assembly	90	69	140972	425638	4058241	0.285	0	0	0	ST1
ERR347963_ST1	Sequence data + in-house assembly	77	58	141065	290263	4054607	0.2836	0	0	0	ST1
ERR347964_ST1	Sequence data + in-house assembly	88	61	134594	360689	4151768	0.2865	0	0	0	ST1
ERR347965_ST1	Sequence data + in-house assembly	95	77	129555	328173	4118409	0.285	0	0	0	ST1
ERR347966_ST1	Sequence data + in-house assembly	78	55	146832	314468	4112362	0.2849	0	0	0	ST1
ERR347967_ST1	Sequence data + in-house assembly	87	69	134600	276797	4139329	0.2859	0	0	0	ST1
ERR347968_ST1	Sequence data + in-house assembly	83	63	148047	435753	4124104	0.2853	0	0	0	ST1
ERR347969_ST1	Sequence data + in-house assembly	90	56	166923	354026	4116902	0.2849	0	0	0	ST1
ERR347970_ST1	Sequence data + in-house assembly	84	58	149461	354017	4113739	0.2849	0	0	0	ST1
ERR347971_ST1	Sequence data + in-house assembly	67	54	142107	408289	4136576	0.2857	0	0	0	ST1
ERR347972_ST1	Sequence data + in-house assembly	90	58	198843	425165	4121079	0.285	0	0	0	ST1
ERR347973_ST1	Sequence data + in-house assembly	90	75	108105	425855	4115805	0.2849	0	0	0	ST1
ERR347974_ST1	Sequence data + in-house assembly	84	63	129037	372468	4095992	0.2851	0	0	0	ST1
ERR347975_ST1	Sequence data + in-house assembly	85	66	129037	289363	4133772	0.2856	1	0	0	ST1
ERR347976_ST1	Sequence data + in-house assembly	80	62	143976	472106	4155315	0.2869	0	0	0	ST1
ERR347977_ST1	Sequence data + in-house assembly	84	67	129480	409177	4124839	0.2849	0	0	0	ST1
ERR347978_ST1	Sequence data + in-house assembly	83	60	147993	407959	4108329	0.2849	0	0	0	ST1
ERR347979_ST1	Sequence data + in-house assembly	92	66	125168	299550	4112661	0.285	0	0	0	ST1
ERR347980_ST1	Sequence data + in-house assembly	149	84	134594	425386	4138547	0.285	0	0	0	ST1
ERR347981_ST1	Sequence data + in-house assembly	101	88	101371	318620	4112191	0.285	0	0	0	ST1
ERR347982_ST1	Sequence data + in-house assembly	78	59	147168	407932	4053443	0.2836	0	0	0	ST1
ERR347983_ST1	Sequence data + in-house assembly	92	61	147142	424890	4095237	0.2851	0	0	0	ST1
ERR347984_ST1	Sequence data + in-house assembly	75	56	169080	354403	4121797	0.2847	0	0	0	ST1
ERR347985_ST1	Sequence data + in-house assembly	85	63	149930	408020	4120623	0.2848	0	0	0	ST1
ERR347986_ST1	Sequence data + in-house assembly	84	60	192675	408966	4118170	0.285	0	0	0	ST1
ERR347987_ST1	Sequence data + in-house assembly	76	60	219380	425307	4111039	0.285	0	0	0	ST1
ERR347988_ST1	Sequence data + in-house assembly	77	65	143969	389583	4094228	0.2851	0	0	0	ST1
ERR347989_ST1	Sequence data + in-house assembly	99	80	115560	254220	4111484	0.285	0	0	0	ST1
ERR347990_ST1	Sequence data + in-house assembly	114	92	107964	367174	4144876	0.2839	0	0	0	ST1
ERR347991_ST1	Sequence data + in-house assembly	152	76	109122	318564	4128641	0.2849	0	0	0	ST1
ERR348049_ST1	Sequence data + in-house assembly	94	73	115270	376410	4125854	0.284	0	0	0	ST1
ERR348050_ST1	Sequence data + in-house assembly	78	59	166964	425250	4112093	0.2849	0	0	0	ST1
ERR348051_ST1	Sequence data + in-house assembly	72	54	129345	408258	4110079	0.2848	0	0	0	ST1
ERR348052_ST1	Sequence data + in-house assembly	91	75	123511	318421	4114063	0.285	0	0	0	ST1
ERR348053_ST1	Sequence data + in-house assembly	101	78	115005	272808	4124309	0.2848	0	0	0	ST1
ERR348054_ST1	Sequence data + in-house assembly	85	62	145189	354646	4115278	0.2849	0	0	0	ST1
ERR348055_ST1	Sequence data + in-house assembly	84	59	147073	425222	4055336	0.2849	0	0	0	ST1
ERR348056_ST1	Sequence data + in-house assembly	73	54	141079	325677	4054393	0.2836	0	0	0	ST1
ERR348057_ST1	Sequence data + in-house assembly	83	61	146851	408659	4151101	0.2865	0	0	0	ST1
ERR348058_ST1	Sequence data + in-house assembly	87	60	147283	276797	4117772	0.285	0	0	0	ST1
ERR348059_ST1	Sequence data + in-house assembly	330	227	141200	425284	4393403	0.2842	0	0	0	ST1
ERR348060_ST1	Sequence data + in-house assembly	100	70	128980	354187	4144679	0.2859	0	0	0	ST1
ERR348061_ST1	Sequence data + in-house assembly	87	63	141690	310116	4124449	0.2853	0	0	0	ST1
ERR348062_ST1	Sequence data + in-house assembly	97	60	147368	408076	4118805	0.2849	0	0	0	ST1
ERR348063_ST1	Sequence data + in-house assembly	86	62	150165	354347	4111264	0.2849	0	0	0	ST1
ERR348064_ST1	Sequence data + in-house assembly	156	140	59532	240925	4136484	0.2857	0	0	0	ST1
ERR348065_ST1	Sequence data + in-house assembly	138	77	123498	318608	4133891	0.2852	0	0	0	ST1
ERR348066_ST1	Sequence data + in-house assembly	83	66	166802	425214	4113043	0.285	0	0	0	ST1
ERR348067_ST1	Sequence data + in-house assembly	84	64	134600	372211	4094605	0.2851	0	0	0	ST1
ERR348068_ST1	Sequence data + in-house assembly	76	57	166986	425418	4132884	0.2856	0	0	0	ST1
ERR348069_ST1	Sequence data + in-house assembly	79	57	149446	472270	4159025	0.2868	0	0	0	ST1
ERR348070_ST1	Sequence data + in-house assembly	83	64	174182	409415	4124095	0.2849	0	0	0	ST1
ERR348071_ST1	Sequence data + in-house assembly	110	62	147047	407981	4118614	0.2849	0	0	0	ST1
ERR348072_ST1	Sequence data + in-house assembly	90	70	141381	425319	4115898	0.2849	0	0	0	ST1
ERR348073_ST1	Sequence data + in-house assembly	132	66	167053	425335	4135091	0.2851	0	0	0	ST1
ERR348074_ST1	Sequence data + in-house assembly	90	75	115004	318665	4113985	0.285	0	0	0	ST1
ERR348075_ST1	Sequence data + in-house assembly	68	57	160667	367709	4054830	0.2836	0	0	0	ST1
ERR348076_ST1	Sequence data + in-house assembly	77	62	149507	425419	4092450	0.2851	0	0	0	ST1
ERR348077_ST1	Sequence data + in-house assembly	76	57	170114	409323	4118879	0.2848	0	0	0	ST1
ERR348078_ST1	Sequence data + in-house assembly	99	65	168971	407632	4122842	0.2848	0	0	0	ST1
ERR348079_ST1	Sequence data + in-house assembly	98	69	134594	299319	4104160	0.2851	0	0	0	ST1
ERR348080_ST1	Sequence data + in-house assembly	69	54	166981	424873	4113699	0.2849	0	0	0	ST1
ERR348081_ST1	Sequence data + in-house assembly	76	61	140765	254379	4141958	0.2856	0	0	0	ST1
ERR348084_ST1	Sequence data + in-house assembly	83	64	141241	407720	4109397	0.2849	0	0	0	ST1
ERR348091_ST1	Sequence data + in-house assembly	81	61	169093	408135	4191795	0.2854	0	0	0	ST1
ERR348092_ST1	Sequence data + in-house assembly	88	67	128995	289359	4361311	0.2826	0	0	0	ST1
ERR467549_ST1	Sequence data + in-house assembly	111	64	146832	424803	4199989	0.285	0	0	0	ST1
ERR467551_ST1	Sequence data + in-house assembly	96	60	219038	424855	4200333	0.2849	0	0	0	ST1
ERR467553_ST1	Sequence data + in-house assembly	95	60	147124	425038	4149896	0.2849	0	0	0	ST1
ERR467554_ST1	Sequence data + in-house assembly	98	58	150127	425166	4151746	0.285	0	0	0	ST1
ERR467556_ST1	Sequence data + in-house assembly	95	58	218327	425203	4154136	0.2849	0	0	0	ST1
ERR467557_ST1	Sequence data + in-house assembly	90	58	149763	424999	4154242	0.2849	0	0	0	ST1
ERR467558_ST1	Sequence data + in-house assembly	94	56	218788	425132	4148926	0.2849	0	0	0	ST1
ERR467560_ST1	Sequence data + in-house assembly	104	62	149409	424900	4134081	0.285	0	0	0	ST1
ERR467561_ST1	Sequence data + in-house assembly	86	56	150339	425001	4146902	0.2849	0	0	0	ST1
ERR467562_ST1	Sequence data + in-house assembly	91	64	218239	425166	4111634	0.2847	0	0	0	ST1
ERR467564_ST1	Sequence data + in-house assembly	89	61	147324	426147	4150822	0.285	0	0	0	ST1
ERR467566_ST1	Sequence data + in-house assembly	98	67	147287	424848	4202337	0.2849	0	0	0	ST1
ERR467576_ST1	Sequence data + in-house assembly	94	56	150359	424713	4149366	0.2849	0	0	0	ST1
ERR467577_ST1	Sequence data + in-house assembly	97	63	147102	424855	4151092	0.285	0	0	0	ST1
ERR467583_ST1	Sequence data + in-house assembly	97	61	146939	424817	4151438	0.285	0	0	0	ST1
ERR467584_ST1	Sequence data + in-house assembly	98	57	218670	425044	4153370	0.2849	0	0	0	ST1
ERR467589_ST1	Sequence data + in-house assembly	100	64	146819	424848	4112010	0.2847	0	0	0	ST1
ERR467590_ST1	Sequence data + in-house assembly	102	64	146961	424779	4149618	0.2849	0	0	0	ST1
ERR467593_ST1	Sequence data + in-house assembly	104	64	218813	424855	4152520	0.2849	0	0	0	ST1
ERR502962_ST1	Sequence data + in-house assembly	559	436	18171	79627	4098463	0.2871	0	0	0	ST1
ERR537821_ST1	Sequence data + in-house assembly	559	436	18171	79627	4098463	0.2871	0	0	0	ST1
ERR658294_ST1	Sequence data + in-house assembly	287	68	134556	395162	4136871	0.2862	0	0	0	ST1
ERR658295_ST1	Sequence data + in-house assembly	222	71	141694	394916	4141707	0.2862	0	0	0	ST1
ERR658301_ST1	Sequence data + in-house assembly	242	69	134556	394916	4141165	0.2863	0	0	0	ST1
ERR658302_ST1	Sequence data + in-house assembly	210	71	134556	394916	4138753	0.2862	0	0	0	ST1
ERR658303_ST1	Sequence data + in-house assembly	208	69	134532	395026	4140291	0.2861	1	0	0	ST1
ERR658304_ST1	Sequence data + in-house assembly	223	80	123833	396675	4140663	0.2863	0	0	0	ST1
ERR658305_ST1	Sequence data + in-house assembly	211	70	134556	396765	4140464	0.2861	0	0	0	ST1
ERR658306_ST1	Sequence data + in-house assembly	223	74	134556	395401	4141415	0.2862	0	0	0	ST1
ERR658307_ST1	Sequence data + in-house assembly	294	64	134556	394616	4138340	0.2862	0	0	0	ST1
ERR658308_ST1	Sequence data + in-house assembly	224	72	134532	310072	4112790	0.2849	0	0	0	ST1
ERR658309_ST1	Sequence data + in-house assembly	217	68	134532	309962	4113157	0.2849	0	0	0	ST1
ERR658310_ST1	Sequence data + in-house assembly	245	70	134532	309962	4111999	0.2849	0	0	0	ST1
ERR658311_ST1	Sequence data + in-house assembly	237	67	134532	309946	4111442	0.2849	0	0	0	ST1
ERR658312_ST1	Sequence data + in-house assembly	214	71	128941	310072	4115028	0.2849	2	0	0	ST1
ERR658313_ST1	Sequence data + in-house assembly	229	79	134532	309962	4113238	0.2848	0	0	0	ST1
ERR658314_ST1	Sequence data + in-house assembly	244	68	134532	310230	4115049	0.2849	0	0	0	ST1
ERR928274_ST1	Sequence data + in-house assembly	115	60	134594	356982	4115623	0.2849	9	0	0	ST1
ERR928275_ST1	Sequence data + in-house assembly	108	58	140781	407874	4115861	0.2849	6	0	0	ST1
ERR928277_ST1	Sequence data + in-house assembly	106	59	140971	408088	4117715	0.285	4	0	0	ST1
ERR928278_ST1	Sequence data + in-house assembly	106	66	141527	407874	4121911	0.2851	4	0	0	ST1
ERR928279_ST1	Sequence data + in-house assembly	102	61	134594	357066	4113150	0.2849	2	0	0	ST1
ERR928280_ST1	Sequence data + in-house assembly	80	57	141667	310308	4116609	0.2849	0	0	0	ST1
ERR928281_ST1	Sequence data + in-house assembly	70	52	141294	408218	4112786	0.285	0	0	0	ST1
ERR928282_ST1	Sequence data + in-house assembly	100	55	146899	356637	4118334	0.285	0	0	0	ST1
ERR928283_ST1	Sequence data + in-house assembly	91	54	187280	357075	4115323	0.285	0	0	0	ST1
ERR928284_ST1	Sequence data + in-house assembly	87	59	141099	356420	4115819	0.2849	0	0	0	ST1
ERR928285_ST1	Sequence data + in-house assembly	83	55	141503	408084	4114726	0.2849	0	0	0	ST1
ERR928287_ST1	Sequence data + in-house assembly	90	66	134600	407732	4113068	0.2849	0	0	0	ST1
ERR928288_ST1	Sequence data + in-house assembly	104	56	160406	408560	4124933	0.2849	0	0	0	ST1
ERR928289_ST1	Sequence data + in-house assembly	209	71	142454	711505	4171483	0.2862	0	0	0	ST1
ERR928290_ST1	Sequence data + in-house assembly	97	65	122382	453219	4119340	0.285	0	0	0	ST1
ERR928295_ST1	Sequence data + in-house assembly	93	58	147361	407384	4115131	0.2849	0	0	0	ST1
ERR928296_ST1	Sequence data + in-house assembly	80	53	147532	452981	4119453	0.285	1	0	0	ST1
ERR928297_ST1	Sequence data + in-house assembly	82	53	144403	452897	4121192	0.2851	0	0	0	ST1
ERR928298_ST1	Sequence data + in-house assembly	93	62	141739	356416	4112216	0.2849	1	0	0	ST1
ERR928299_ST1	Sequence data + in-house assembly	78	47	187679	453555	4120650	0.2851	0	0	0	ST1
ERR928300_ST1	Sequence data + in-house assembly	87	52	143904	354053	4128703	0.2853	0	0	0	ST1
ERR928301_ST1	Sequence data + in-house assembly	79	53	142486	452847	4118419	0.285	0	0	0	ST1
ERR928302_ST1	Sequence data + in-house assembly	96	55	142034	453555	4118691	0.285	0	0	0	ST1
ERR928303_ST1	Sequence data + in-house assembly	179	63	142467	453554	4162370	0.2861	0	0	0	ST1
ERR928304_ST1	Sequence data + in-house assembly	95	58	134793	354436	4124684	0.2849	0	0	0	ST1
ERR928305_ST1	Sequence data + in-house assembly	99	67	117564	453554	4117417	0.285	0	0	0	ST1
ERR928306_ST1	Sequence data + in-house assembly	194	75	116105	361619	4139021	0.2854	0	0	0	ST1
ERR928307_ST1	Sequence data + in-house assembly	225	100	97107	242324	4154630	0.2857	0	0	0	ST1
ERR928308_ST1	Sequence data + in-house assembly	448	317	26449	130684	4188734	0.2869	0	0	0	ST1
ERR928309_ST1	Sequence data + in-house assembly	154	114	71974	160220	4135054	0.2856	0	0	0	ST1
ERR928310_ST1	Sequence data + in-house assembly	257	143	57735	172594	4146943	0.2858	2	0	0	ST1
ERR928311_ST1	Sequence data + in-house assembly	316	246	36251	113938	4139289	0.2859	0	0	0	ST1
ERR928312_ST1	Sequence data + in-house assembly	142	110	71750	171602	4121299	0.2853	0	0	0	ST1
ERR955906_ST1	Sequence data + in-house assembly	134	75	119370	310308	4123332	0.2857	0	0	0	ST1
SAMEA3467896_ST1	Sequence data + in-house assembly	183	66	141097	309958	4120251	0.285	6	0	0	ST1
SAMEA3467897_ST1	Sequence data + in-house assembly	399	95	90543	244909	4122283	0.2855	8	0	0	ST1
SAMEA3467899_ST1	Sequence data + in-house assembly	334	107	72736	244998	4121504	0.2855	4	0	0	ST1
SAMEA3467900_ST1	Sequence data + in-house assembly	123	57	146892	424950	4111986	0.285	4	0	0	ST1
SAMEA3467901_ST1	Sequence data + in-house assembly	317	87	107988	276753	4124205	0.2855	0	0	0	ST1
SAMEA3467902_ST1	Sequence data + in-house assembly	223	179	46873	130781	4102932	0.2849	5	0	0	ST1
SAMEA3467903_ST1	Sequence data + in-house assembly	150	113	92167	318346	4116056	0.2849	4	0	0	ST1
SAMEA3467904_ST1	Sequence data + in-house assembly	227	106	92947	245013	4176290	0.2857	6	0	0	ST1
SAMEA3467906_ST1	Sequence data + in-house assembly	274	179	44948	211888	4119841	0.2845	6	0	0	ST1
SAMEA3467933_ST1	Sequence data + in-house assembly	156	55	142487	453555	4150134	0.2858	0	0	0	ST1
SAMEA3467934_ST1	Sequence data + in-house assembly	206	75	147598	711744	4176131	0.2866	1	0	0	ST1
SAMN03473811_ST1	Sequence data + in-house assembly	196	64	147317	408219	4149015	0.2855	0	0	0	ST1
SAMN03473812_ST1	Sequence data + in-house assembly	200	59	147410	408329	4140347	0.2852	0	0	0	ST1
SAMN03473813_ST1	Sequence data + in-house assembly	204	66	147280	408306	4160651	0.2866	0	0	0	ST1
SAMN03473816_ST1	Sequence data + in-house assembly	192	67	147317	408326	4129520	0.285	0	0	0	ST1
SAMN03473819_ST1	Sequence data + in-house assembly	220	67	139267	408657	4131891	0.2849	0	0	0	ST1
SAMN03473822_ST1	Sequence data + in-house assembly	208	68	134532	309995	4117931	0.2851	0	0	0	ST1
SAMN03473828_ST1	Sequence data + in-house assembly	205	59	147317	408860	4127038	0.2849	1	0	0	ST1
SRR2047584_ST1	Sequence data + in-house assembly	209	70	147326	408604	4159364	0.2866	0	0	0	ST1
SRR2047585_ST1	Sequence data + in-house assembly	209	63	147410	408326	4159619	0.2865	0	0	0	ST1
SRR2047594_ST1	Sequence data + in-house assembly	199	65	146932	408323	4204894	0.2865	0	0	0	ST1
SRR2047595_ST1	Sequence data + in-house assembly	215	69	147280	408199	4205113	0.2865	0	0	0	ST1
SRR2047596_ST1	Sequence data + in-house assembly	209	64	147280	408202	4127902	0.2849	0	0	0	ST1
SRR2047603_ST1	Sequence data + in-house assembly	221	66	147243	408567	4126532	0.2849	0	0	0	ST1
SRR2047617_ST1	Sequence data + in-house assembly	193	60	141763	407960	4109808	0.2848	0	0	0	ST1
SRR2047823_ST1	Sequence data + in-house assembly	200	60	146979	408656	4158058	0.2866	0	0	0	ST1
SRR2047842_ST1	Sequence data + in-house assembly	191	65	147410	408353	4157496	0.2865	0	0	0	ST1
SRR2047849_ST1	Sequence data + in-house assembly	221	65	146932	407845	4161937	0.2866	0	0	0	ST1
SRR4300546_ST1	Sequence data + in-house assembly	104	71	113174	245382	4054149	0.2849	0	0	0	ST1
SRR4300547_ST1	Sequence data + in-house assembly	110	62	141514	452645	4065828	0.285	0	0	0	ST1
SRR4300552_ST1	Sequence data + in-house assembly	97	60	134890	452979	4181492	0.2863	0	0	0	ST1
SRR4300553_ST1	Sequence data + in-house assembly	89	58	149728	452979	4182033	0.2863	0	0	0	ST1
SRR4300562_ST1	Sequence data + in-house assembly	92	58	137195	452643	4160212	0.2859	0	0	0	ST1
SRR4300563_ST1	Sequence data + in-house assembly	144	80	114047	222768	4169459	0.2862	0	0	0	ST1
SRR4300578_ST1	Sequence data + in-house assembly	101	64	134884	310287	4166121	0.286	2	0	0	ST1
SRR4300579_ST1	Sequence data + in-house assembly	88	57	149701	355055	4165157	0.286	0	0	0	ST1
SRR4300580_ST1	Sequence data + in-house assembly	392	189	110178	258144	4307801	0.2862	1	0	0	ST1
SRR5169300_ST1	Sequence data + in-house assembly	667	237	46104	221905	4359404	0.2908	0	0	0	ST1
SRR593294_ST1	Sequence data + in-house assembly	566	242	38974	122028	4186515	0.2868	1	0	0	ST1
SRR593312_ST1	Sequence data + in-house assembly	92	59	149602	424855	4112146	0.2849	0	0	0	ST1
SRR593320_ST1	Sequence data + in-house assembly	84	58	149405	424855	4108514	0.2848	1	0	0	ST1
SRR5945685_ST1	Sequence data + in-house assembly	54	38	260251	930618	4152860	0.2865	0	0	0	ST1
SRR5945686_ST1	Sequence data + in-house assembly	55	36	260245	847467	4152254	0.2865	0	0	0	ST1
SRR5945687_ST1	Sequence data + in-house assembly	54	36	260245	999079	4153297	0.2864	0	0	0	ST1
SRR5945688_ST1	Sequence data + in-house assembly	60	42	231132	848010	4149673	0.2865	0	0	0	ST1
SRR776481_ST1	Sequence data + in-house assembly	181	72	134550	309807	4058988	0.2836	0	0	0	ST1
ERR026846_ST10	Sequence data
ERR1015449_ST10	Sequence data
ERR1015451_ST10	Sequence data
ERR1015508_ST10	Sequence data
ERR1015529_ST10	Sequence data
ERR1015540_ST10	Sequence data
ERR1024444_ST10	Sequence data
ERR1024445_ST10	Sequence data
ERR125980_ST10	Sequence data
ERR1853184_ST10	Sequence data
ERR251800_ST10	Sequence data
ERR251802_ST10	Sequence data
ERR251874_ST10	Sequence data
ERR277267_ST10	Sequence data
ERR339504_ST10	Sequence data
ERR339505_ST10	Sequence data
ERR339506_ST10	Sequence data
ERR339507_ST10	Sequence data
ERR339508_ST10	Sequence data
ERR340075_ST10	Sequence data
ERR340123_ST10	Sequence data
ERR340142_ST10	Sequence data
ERR340162_ST10	Sequence data
ERR340175_ST10	Sequence data
ERR340178_ST10	Sequence data
ERR340194_ST10	Sequence data
ERR340211_ST10	Sequence data
ERR340235_ST10	Sequence data
ERR340250_ST10	Sequence data
ERR340259_ST10	Sequence data
ERR340268_ST10	Sequence data
ERR340277_ST10	Sequence data
ERR340280_ST10	Sequence data
ERR340293_ST10	Sequence data
ERR347413_ST10	Sequence data
ERR347421_ST10	Sequence data
ERR347423_ST10	Sequence data
ERR347424_ST10	Sequence data
ERR347448_ST10	Sequence data
ERR347455_ST10	Sequence data
ERR347490_ST10	Sequence data
ERR347496_ST10	Sequence data
ERR347499_ST10	Sequence data
ERR347522_ST10	Sequence data
ERR347552_ST10	Sequence data
ERR347556_ST10	Sequence data
ERR347600_ST10	Sequence data
ERR347732_ST10	Sequence data
ERR347739_ST10	Sequence data
ERR347746_ST10	Sequence data
ERR347790_ST10	Sequence data
ERR347890_ST10	Sequence data
ERR347896_ST10	Sequence data
ERR347902_ST10	Sequence data
ERR347920_ST10	Sequence data
ERR347921_ST10	Sequence data
ERR347925_ST10	Sequence data
ERR348016_ST10	Sequence data
ERR348017_ST10	Sequence data
ERR348109_ST10	Sequence data
ERR348110_ST10	Sequence data
ERR348118_ST10	Sequence data
SAMN01978901_ST10	Sequence data
SRR3115487_ST10	Sequence data
SRR593179_ST10	Sequence data
SRR593183_ST10	Sequence data
SRR593187_ST10	Sequence data
SRR593196_ST10	Sequence data
SRR593220_ST10	Sequence data
SRR593384_ST10	Sequence data
SRR593394_ST10	Sequence data
SRR776454_ST10	Sequence data
SRR4125186_ST102	Sequence data
ERR1024384_ST103	Sequence data
ERR232388_ST103	Sequence data
ERR340135_ST103	Sequence data
ERR348045_ST103	Sequence data
ERR348138_ST103	Sequence data
SRR4300568_ST103	Sequence data
ERR232389_ST107	Sequence data
ERR340246_ST107	Sequence data
ERR340252_ST107	Sequence data
ERR347473_ST107	Sequence data
ERR605021_ST107	Sequence data
SAMEA3294090_ST107	Sequence data
SAMEA3297403_ST107	Sequence data
ERR1015515_ST109	Sequence data
ERR1015522_ST109	Sequence data
ERR125973_ST109	Sequence data
SRR1185961_ST109	Sequence data
ERR025022_ST11	Sequence data
ERR027336_ST11	Sequence data
ERR027337_ST11	Sequence data
ERR027339_ST11	Sequence data
ERR027340_ST11	Sequence data
ERR027341_ST11	Sequence data
ERR027342_ST11	Sequence data
ERR027343_ST11	Sequence data
ERR027345_ST11	Sequence data
ERR027346_ST11	Sequence data
ERR027347_ST11	Sequence data
ERR027349_ST11	Sequence data
ERR027350_ST11	Sequence data
ERR027351_ST11	Sequence data
ERR027352_ST11	Sequence data
ERR027353_ST11	Sequence data
ERR027354_ST11	Sequence data
ERR027355_ST11	Sequence data
ERR027356_ST11	Sequence data
ERR027358_ST11	Sequence data
ERR027359_ST11	Sequence data
ERR027360_ST11	Sequence data
ERR1015454_ST11	Sequence data
ERR1015513_ST11	Sequence data
ERR1024372_ST11	Sequence data
ERR1256645_ST11	Sequence data
ERR1256646_ST11	Sequence data
ERR1256647_ST11	Sequence data
ERR125961_ST11	Sequence data
ERR125962_ST11	Sequence data
ERR125981_ST11	Sequence data
ERR125983_ST11	Sequence data
ERR125984_ST11	Sequence data
ERR171190_ST11	Sequence data
ERR171191_ST11	Sequence data
ERR171192_ST11	Sequence data
ERR171193_ST11	Sequence data
ERR171194_ST11	Sequence data
ERR171195_ST11	Sequence data
ERR171196_ST11	Sequence data
ERR171197_ST11	Sequence data
ERR171198_ST11	Sequence data
ERR171199_ST11	Sequence data
ERR171200_ST11	Sequence data
ERR171201_ST11	Sequence data
ERR171202_ST11	Sequence data
ERR171203_ST11	Sequence data
ERR171204_ST11	Sequence data
ERR171205_ST11	Sequence data
ERR171206_ST11	Sequence data
ERR171207_ST11	Sequence data
ERR171208_ST11	Sequence data
ERR171209_ST11	Sequence data
ERR171210_ST11	Sequence data
ERR171211_ST11	Sequence data
ERR171212_ST11	Sequence data
ERR171213_ST11	Sequence data
ERR171214_ST11	Sequence data
[truncated: 3,254 more rows]
