# Supplementary material for: A global to local genomics analysis of Clostridioides difficile ST1/RT027 identifies cryptic transmission events in a northern Arizona healthcare network
Source: Microb Genom. 2019 May 20;5(7):e000271. doi: 10.1099/mgen.0.000271 (PMC6700662; doi:10.1099/mgen.0.000271)
Supplement: Supplementary File 5 [file mgen-5-271-s005.xlsx]

## Sheet: Sheet1
Table S5. Assessment of statistical fits for clock and demographic model combination
clock model	constant	EBSL	GMRF	skyline
strict	-5.31214e+06	-5.30815e+06	-3.81366e+06	-5.31214e+06
uncorrelated relaxed lognormal	-5.31212e+06	-5.3124e+06	-5.31213e+06	-5.31212e+06
