# Supplementary material for: A global to local genomics analysis of Clostridioides difficile ST1/RT027 identifies cryptic transmission events in a northern Arizona healthcare network
Source: Microb Genom. 2019 May 20;5(7):e000271. doi: 10.1099/mgen.0.000271 (PMC6700662; doi:10.1099/mgen.0.000271)
Supplement: Supplementary File 6 [file mgen-5-271-s006.xlsx]

## Sheet: Sheet1
Table S6. Previously described genomic regions associated with virulence in C. difficile ST1
ID	Annotation	Source genome	Reference
CDR20291_0223	dtdp-4-dehydrorhamnose reductase	Clostridioides difficile R20291	Stabler et al. 2009
CDR20291_0224	glucose-1-phosphate thymidylyltransferase	Clostridioides difficile R20291	Stabler et al. 2009
CDR20291_0225	dtdp-4-dehydrorhamnose 3,5-epimerase	Clostridioides difficile R20291	Stabler et al. 2009
CDR20291_0226	dtdp-glucose 4,6-dehydratase	Clostridioides difficile R20291	Stabler et al. 2009
CDR20291_0183	Putative membrane protein	Clostridioides difficile R20291	Stabler et al. 2009
CDR20291_1419	Uncharacterized protein	Clostridioides difficile R20291	Stabler et al. 2009
CDR20291_1744	Site-specific recombinase	Clostridioides difficile R20291	Stabler et al. 2009
CDR20291_1745	Uncharacterized protein	Clostridioides difficile R20291	Stabler et al. 2009
CDR20291_1746	Uncharacterized protein	Clostridioides difficile R20291	Stabler et al. 2009
CDR20291_1747	Putative conjugative transposon regulatory protein	Clostridioides difficile R20291	Stabler et al. 2009
CDR20291_1748	Two-component response regulator	Clostridioides difficile R20291	Stabler et al. 2009
CDR20291_1749	Sensor protein	Clostridioides difficile R20291	Stabler et al. 2009
CDR20291_1750	Putative lantibiotic ABC transporter, ATP-binding protein	Clostridioides difficile R20291	Stabler et al. 2009
CDR20291_1751	Putative lantibiotic ABC transporter, permease protein	Clostridioides difficile R20291	Stabler et al. 2009
CDR20291_1752	Putative lantibiotic ABC transporter, permease protein	Clostridioides difficile R20291	Stabler et al. 2009
CDR20291_1753	Uncharacterized protein	Clostridioides difficile R20291	Stabler et al. 2009
CDR20291_1754	RNA polymerase, sigma-24 subunit, ECF subfamily	Clostridioides difficile R20291	Stabler et al. 2009
CDR20291_1755	Sigma-24 (feci)	Clostridioides difficile R20291	Stabler et al. 2009
CDR20291_1756	RNA polymerase, sigma-24 subunit, ECF subfamily	Clostridioides difficile R20291	Stabler et al. 2009
CDR20291_1757	Uncharacterized protein	Clostridioides difficile R20291	Stabler et al. 2009
CDR20291_1758	Uncharacterized protein	Clostridioides difficile R20291	Stabler et al. 2009
CDR20291_1759	Addiction module toxin, RelE/StbE family	Clostridioides difficile R20291	Stabler et al. 2009
CDR20291_1760	Addiction module antitoxin, RelB/DinJ family	Clostridioides difficile R20291	Stabler et al. 2009
CDR20291_1761	Uncharacterized protein	Clostridioides difficile R20291	Stabler et al. 2009
CDR20291_1762	Phage protein	Clostridioides difficile R20291	Stabler et al. 2009
CDR20291_1763	Replicative DNA helicase	Clostridioides difficile R20291	Stabler et al. 2009
CDR20291_1764	Uncharacterized protein	Clostridioides difficile R20291	Stabler et al. 2009
CDR20291_1765	Uncharacterized protein	Clostridioides difficile R20291	Stabler et al. 2009
CDR20291_1766	Transcription regulator (yobD protein)	Clostridioides difficile R20291	Stabler et al. 2009
CDR20291_1767	Uncharacterized protein	Clostridioides difficile R20291	Stabler et al. 2009
CDR20291_1768	Uncharacterized protein	Clostridioides difficile R20291	Stabler et al. 2009
CDR20291_1769	Uncharacterized protein	Clostridioides difficile R20291	Stabler et al. 2009
CDR20291_1770	Uncharacterized protein	Clostridioides difficile R20291	Stabler et al. 2009
CDR20291_1771	Uncharacterized protein	Clostridioides difficile R20291	Stabler et al. 2009
CDR20291_1772	Uncharacterized protein	Clostridioides difficile R20291	Stabler et al. 2009
CDR20291_1773	Uncharacterized protein	Clostridioides difficile R20291	Stabler et al. 2009
CDR20291_1774	Uncharacterized protein	Clostridioides difficile R20291	Stabler et al. 2009
CDR20291_1775	Uncharacterized protein	Clostridioides difficile R20291	Stabler et al. 2009
CDR20291_1776	Putative conjugal transfer protein (putative single-stranded DNA binding protein)	Clostridioides difficile R20291	Stabler et al. 2009
CDR20291_1777	Uncharacterized protein	Clostridioides difficile R20291	Stabler et al. 2009
CDR20291_1778	Uncharacterized protein	Clostridioides difficile R20291	Stabler et al. 2009
CDR20291_1779	Uncharacterized protein	Clostridioides difficile R20291	Stabler et al. 2009
CDR20291_1780	Uncharacterized protein	Clostridioides difficile R20291	Stabler et al. 2009
CDR20291_1781	Uncharacterized protein	Clostridioides difficile R20291	Stabler et al. 2009
CDR20291_1782	Uncharacterized protein	Clostridioides difficile R20291	Stabler et al. 2009
CDR20291_1783	Uncharacterized protein	Clostridioides difficile R20291	Stabler et al. 2009
CDR20291_1784	Uncharacterized protein	Clostridioides difficile R20291	Stabler et al. 2009
CDR20291_1785	Uncharacterized protein	Clostridioides difficile R20291	Stabler et al. 2009
CDR20291_1786	Uncharacterized protein	Clostridioides difficile R20291	Stabler et al. 2009
CDR20291_1787	Uncharacterized protein	Clostridioides difficile R20291	Stabler et al. 2009
CDR20291_1788	Uncharacterized protein	Clostridioides difficile R20291	Stabler et al. 2009
CDR20291_1809	Site-specific recombinase	Clostridioides difficile R20291	Stabler et al. 2009
CBA65726.1, TreR Leu172Ile amino acid substitution	GntR-family transcriptional regulator	Clostridioides difficile CD196	Collins et al. 2018
FN665653.1:3231169-3237057	four-gene insertion encoding TreA2, PtsT, TreX, TreR2	Clostridioides difficile M120	Collins et al. 2018
