# Supplementary material for: A global to local genomics analysis of Clostridioides difficile ST1/RT027 identifies cryptic transmission events in a northern Arizona healthcare network
Source: Microb Genom. 2019 May 20;5(7):e000271. doi: 10.1099/mgen.0.000271 (PMC6700662; doi:10.1099/mgen.0.000271)
Supplement: Supplementary File 7 [file mgen-5-271-s007.xlsx]

## Sheet: Sheet1
Table S7. Ribotype region information for three complete C. difficile ST1 genomes
Amplicon length	Amplicon sequence
234	GTGCGGCTGGATCACCTCCTTTCTAAGGAGAATTACCTACTGTTTAATTTTGAGGGTTCGTTTTTACGAATACTCAAAATTAGCACTTTTAGCACTTTGAAAACTGCATATATATTTAGTGATATGACATCTAATTTGTAATATATAAAGCTGATAACTTTTTAAAATTATCGAAGTTGATAGCTTCTAATCTATCAAACCTTTTTAACTGGTCAAGTTATTAAGGGTGCAGGG
267	GTGCGGCTGGATCACCTCCTTTCTAAGGAGAATTACCTACTGTTTAATTTTGAGGGTTTGTTTTTACGAATACTCAAAATTAGCACTTTTAGCAACGGGATTTATCCGTTGGCGCCGTGCTTTAGCACTTTGAAAACTGCATATATATTTAGTGATATGACATCTAATTTGTAATATATAAAGCTGATAACTTTTTAAAATTATCGAAGTTGATAGCTTCTAATCTATCAAACCTTTTTAACTGGTCAAGTTATTAAGGGTGCAGGG
329	GTGCGGCTGGATCACCTCCTTTCTAAGGAGAATTACCTACTGTTTAATTTTGAGGGTTCGTTTTTACGAATACTCAAAATTAGCACTTTTAGCAACAGAATAAACTGAACGCATGTGAAGTTTGTTTGTTGGCGCTGTGCGTTAGCACTTTAAGCAACGGAATTTATTCGTTGGCGCCGTGCTTTAGCACTTTGAAAACTGCATATATATTTAGTGATATGACATCTAATTTGTAATATATAAAGCTGATAACTTTTTAAAATTATCGAAGTTGATAGCTTCTAATCTATCAAACCTTTTTAACTGGTCAAGTTATTAAGGGTGCAGGG
331	GTGCGGCTGGATCACCTCCTTTCTAAGGAGAATTACCTACTGTTTAATTTTGAGGGTTCGTTTTTACGAATACTCAAAATTAGCACTTTTAGCAACAGAATAAACTGAACGCATGTGAAGTTTGTTTGTTGGCGTTGTGCGTTAGCACTTTAAGCAACGGGATTTATCCGTTGGCGCCGTGCTTTAGCACTTTGAAAACTGCATATATATATTTAGTGATATGACATCTAATTTGTAATATATAAAGCTGATAACTTTTTAAAATTATCGAAGTTGATAGCTTCTAATCTATCAAACCTTTTTAACTGGTCAAGTTATTAAGGGTGCAGGG
370	GTGCGGCTGGATCACCTCCTTTCTAAGGAGAATTACCTACTGTTTAATTTTGAGGGTTCGTTTTTACGAATACTCAAAATTAGCACTTTAAGCAACAGAATAAACTGAACGCATGTGAAGTTTGTTTGTTGGCGCTGTGCGTTAGCACTTTAAGCAACGGGATTTATCCGTTGGCGCTGTGCGTTAGCACTTTAAGCAACGGAATTTATTCGTTGGCGACGTGCTTTAGCACTTTGAAAACTGCATATATATTTAGTGATATGACATCTAATTTGTAATATATAAAGCTGATAACTTTTAAAAATTATCAAGTTGATAGACTTTAATCTATCAAACCTTTTTAACTGGTCAAGTTATTAAGGGTGCAGGG
449	GTGCGGCTGGATCACCTCCTTTCTAAGGAGAATTGCCTACTGTTTAATTTTGAAAGTTCTTTACGAACTTTATATATGGGGGTGTAGCTCAGTTGGGAGAGCACTTGCCTTGCAAGCAAGGGGTCAGGAGTTCGACTCTCCTCATCTCCACCATTTAAGAGTATATTACTTAAATCTTTGATTTACTTAGTAGCCTCTTACAATGCACTTATAGCTTAAATTTATACAAGCTTTGTGCGTTAGCACTTTAAGCAACAGAATAAACTGAACGTATGTGAAGTTTGTTTGTTGGCGCTGTGCTTTAGCACTTTGAAAACTGCATATATATATTTAGTGATATGACATCTAATTTGTAATATATAAAGCTGATAACTTTTTAAAATTATCGAAGTTGATAGC…
551	GTGCGGCTGGATCACCTCCTTTCTAAGGAGAATTGCCTACTGTTTAATTTTGAAAGTTCTTTACGAACTTTATATATGGGGGTGTAGCTCAGTTGGGAGAGCACTTGCCTTGCAAGCAAGGGGTCAGGAGTTCGACTCTCCTCATCTCCACCATTTAAGAGTATATTACTTAAATCTTTGATTTACTTAGTAGCCTCTTACAATGCACTTATAGCTTAAATTTATACAAGCTTTGTGCGTTAGCACTTTAAGCAACAGAATAAACTGAGCGCATGTGAAGTTTGTTTGTTGGCGCTGTGCTTTAGCACTTTTAGTAACGGAATAATCTGAGTGAATACGAAGGTTGTTCGTTGACGTGGTGCGTTAGCACTTTAAGCAACGGAATTTATTCGTTGGCGC…
