# Supplementary material for: A global to local genomics analysis of Clostridioides difficile ST1/RT027 identifies cryptic transmission events in a northern Arizona healthcare network
Source: Microb Genom. 2019 May 20;5(7):e000271. doi: 10.1099/mgen.0.000271 (PMC6700662; doi:10.1099/mgen.0.000271)
Supplement: Supplementary File 9 [file mgen-5-271-s009.xlsx]

## Sheet: Sheet1
Table S9. Transposon screen of ST1 genomes
	Breadth of coverage for mobile element (at depth of coverage of 3)														BSR value (AMR markers)			Key
	CTn1-like	Tn6192	Tn6105	Tn5398	Tn6194	Tn6215	Tn6218	Tn916	Tn5397	Tn4453a	Tn4451	TnB1230	Tn1549		ErmB	TetM			Transposon putatviely present based on breadth of coverage of transposon sequence (depth of coverage of 3)
Accession or genome ID	FN545816.1:4099441-4125374	FN545816.1:2087833-2125356	FN545816.1:2059876-2074593	AF109075.2	HG475346.1	KC166248.1	HG002387.1	U09422.1	AF333235.1	AF226276.1	U15027.1	AJ222769.3	AF192329.1		gb|AAF86219.1|ARO:3000375|ErmB	gb|CAJ67339.1|ARO:3000186|tetM			BSR values >0.8
HS-FS-000082-I-02	100	100	0	25.5069	100	27.8828	44.6581	20.1142	0.745474	1.06163	0.297177	0.54013	0.0562047		0.98	0.92
HS-FS-000084-I-02	100	100	0	24.1996	100	25.9225	20.3414	0	0.0919741	0.261961	0	0.54013	0		0.98	0.19
HS-FS-000103-I-02	100	100	0	24.453	100	22.4247	21.0327	0.216282	0.6535	0.799669	0.297177	0.54013	0.112409		0.98	0.19
HS-FS-000127-I-03	100	100	0	25.607	100	23.7777	20.9247	0.454747	0.561526	0.523921	0	0.54013	0.112409		0.98	0.19
HS-FS-000148-I-02	100	100	0	24.3263	100	48.0858	20.6546	0.110914	0.377578	0.523921	0	0.54013	0.112409		0.98	0.19
HS-FS-000151-I-02	100	100	0	30.0494	100	23.2242	23.1554	0.781943	0.45987	0.799669	0.282318	5.28315	0.322438		0.98	0.19
HS-FS-000173-I-03	100	100	0	25.3402	100	23.7623	20.8599	0.560115	0.551844	0.785882	0	0.54013	0.112409		0.98	0.19
HS-FS-000016-I-01	100	100	0	25.6337	100	24.7156	22.2264	0.560115	0.745474	1.06163	0.579495	0.54013	0.112409		0.98	0.19
HS-FS-000023-I-01	100	100	0	25.607	100	23.5778	21.5189	0.560115	0.561526	0.785882	0.564636	0.54013	0.0562047		0.98	0.19
HS-FS-000030-I-01	100	100	0	25.5936	100	24.9462	22.8692	0.454747	0.745474	1.06163	0.579495	0.54013	0.112409		0.98	0.19
HS-FS-000188-I-02	100	100	100	24.3263	0.771043	0.146064	20.8599	0.216282	0.469552	0.799669	0.579495	0.244746	0.112409		0.15	0.19
HS-FS-000020-I-01	100	100	100	24.4597	0.849575	0.292128	20.9625	0.216282	0.745474	1.06163	0.579495	0.244746	0.112409		0.15	0.19
HS-FS-000021-I-01	100	100	100	24.3263	0.849575	0.146064	20.9625	0.216282	0.745474	1.06163	0.297177	0.244746	0.112409		0.15	0.19
HS-FS-000022-I-01	100	100	100	24.453	0.781752	0.292128	20.9625	0.216282	0.561526	0.523921	0.579495	0.244746	0.112409		0.15	0.19
HS-FS-000024-I-01	100	100	100	24.453	0.781752	0.292128	20.9625	0.216282	0.6535	0.785882	0.297177	0.244746	0.112409		0.15	0.19
HS-FS-000025-I-01	100	100	100	24.453	0.842436	0.292128	20.9625	0.216282	0.6535	1.06163	0.579495	0.244746	0.112409		0.15	0.19
HS-FS-000031-I-01	100	100	100	24.453	0.849575	0.292128	20.9625	0.216282	0.745474	1.06163	0.579495	0.244746	0.112409		0.15	0.19
HS-FS-000034-I-02	100	100	100	24.453	0.849575	0.292128	20.9625	0.216282	0.745474	1.06163	0.282318	0.244746	0.112409		0.15	0.19
HS-FS-000043-I-01	100	100	100	24.453	0.849575	0.292128	20.9625	0.216282	0.745474	1.06163	0.579495	0.244746	0.112409		0.15	0.19
HS-FS-000057-I-02	100	100	100	24.453	0.781752	0.292128	20.9625	0.216282	0.745474	1.06163	0.579495	0.244746	0.112409		0.15	0.19
HS-FS-000091-I-02	100	100	100	24.453	0.849575	0.292128	20.9625	0.110914	0.745474	0.799669	0.579495	0.244746	0.112409		0.15	0.19
HS-FS-000251-I-02	100	100	100	24.453	0.849575	0.292128	20.9625	0.216282	0.745474	1.06163	0.579495	0.244746	0.112409		0.15	0.19
HS-FS-000027-I-01	100	2.94212	0.135888	24.5798	1.57778	0.438192	20.8545	0.216282	0.6535	0.523921	0.579495	0	0.0562047		0.15	0.19
HS-FS-000194-I-03	100	1.67093	0	24.5464	0.913829	0.292128	21.1084	0.216282	0.764837	1.07542	0.579495	0	0.112409		0.15	0.19
HS-FS-000264-I-02	100	1.59098	0	24.4597	0.849575	0.292128	21.0003	0.216282	0.745474	1.06163	0.579495	0	0.112409		0.15	0.19
HS-FS-000287-I-02	100	1.53768	0	24.453	0.849575	0.292128	21.0003	0.110914	0.745474	1.06163	0.579495	0	0.112409		0.15	0.19
HS-FS-000292-I-03	100	1.59098	0	24.4731	0.849575	0.292128	20.9625	0.216282	0.745474	1.06163	0.579495	0	0.112409		0.15	0.19
ERR125992_ST1	100	100	100	42.1825	59.8308	7.84133	26.4935	0.776398	0.745474	7.12808	0.579495	0.244746	0.346103		0.99	0.19
ERR026353_ST1	100	100	100	43.8634	59.7737	46.4022	34.8493	1.06477	87.2059	75.8031	11.3819	0	2.55879		0.98	1
ERR030384_ST1	100	100	100	47.7388	62.094	53.9668	37.0422	0.948314	87.7287	79.7601	17.89	0	4.05857		0.98	1
ERR347593_ST1	100	100	100	39.8346	58.3887	11.3007	48.0825	22.1384	3.84355	6.52144	0	0	0		0.98	0.92
ERR347598_ST1	100	100	100	42.1692	58.7064	12.4846	47.9961	22.3048	4.01781	6.97642	0	0	0		0.98	0.92
ERR347611_ST1	100	100	100	39.7879	58.4601	11.4622	48.0339	22.0053	3.374	6.39735	0	0	0		0.98	0.92
ERR348091_ST1	100	100	0.142682	27.5414	100	25.8456	23.0258	100	1.21018	6.82476	0	0.54013	0		0.98	0.92
ERR928309_ST1	100	100	0	25.7137	100	24.6771	33.9203	100	1.73298	4.46712	0.579495	0.54013	0.112409		0.98	0.92
SRR4300552_ST1	100	100	0	30.1027	100	26.5683	45.8518	20.1752	0.943944	5.28057	0.579495	0.54013	0.112409		0.98	0.92
SRR4300553_ST1	100	100	0	30.663	100	26.7374	46.0246	20.1808	0.895537	5.11512	0.579495	0.573888	0.352019		0.98	0.92
ERR029507_ST1	100	100	0	31.1299	100	26.9065	99.9136	0.216282	0.0919741	7.66579	0	0.548569	0.0562047		0.98	0.19
ERR029511_ST1	100	100	0.135888	29.1222	100	26.2069	41.5469	0	0.19363	7.4452	0	0.54013	0.0562047		0.98	0.19
ERR029512_ST1	100	100	0.149477	44.7372	100	30.2199	86.7236	1.40306	0.183948	8.38274	0	0.244746	0.266233		0.98	0.19
ERR029514_ST1	100	100	0	29.1222	100	26.3453	23.6902	0	0	7.72094	0	0.489493	0.106493		0.98	0.19
ERR029517_ST1	100	100	0	29.1956	100	27.2678	23.9386	0	0.188789	8.78257	0	0.54013	0.0562047		0.98	0.19
ERR029518_ST1	100	100	0.0067944	28.1884	100	26.2608	23.3013	0	0.0919741	8.14835	0	0.54013	0.0562047		0.98	0.19
ERR029539_ST1	100	100	100	44.3103	59.6238	11.8696	25.6185	1.07587	0	8.50682	0	0.210988	0		0.98	0.19
ERR030324_ST1	100	100	0	29.4023	100	26.1531	26.4124	0	0	7.10051	0	0	0.130158		0.98	0.19
ERR031675_ST1	100	100	100	28.2484	26.0298	4.85855	35.2814	0.305013	0.271081	7.21081	0	0	0		0.98	0.19
ERR031689_ST1	100	100	0	44.6905	100	29.3435	86.81	1.09805	0	6.8937	0	0.54013	0.192279		0.98	0.19
ERR031690_ST1	100	100	0	45.6644	100	29.9969	86.7614	1.0925	0	8.50682	0	0.489493	0.266233		0.98	0.19
ERR044801_ST1	100	100	0.353309	33.9314	100	27.5062	23.8144	0.964951	0	8.755	0	0.54013	0		0.98	0.19
ERR044819_ST1	100	100	100	31.7636	2.95923	5.77337	23.4309	0	0	8.58955	0	0	0		0.98	0.19
ERR044820_ST1	100	100	100	31.3901	2.9521	5.77337	23.2851	0	0	8.45168	0	0	0		0.98	0.19
ERR044821_ST1	100	100	100	32.1238	2.95567	5.77337	23.3823	0	0	8.79636	0	0	0		0.98	0.19
ERR044822_ST1	100	100	100	31.4034	2.9521	5.77337	23.4093	0	0	8.54819	0	0	0		0.98	0.19
ERR044823_ST1	100	100	100	31.2767	2.95567	5.77337	23.3931	0	0	8.60334	0	0	0		0.98	0.19
ERR044824_ST1	100	100	100	30.7164	2.95567	5.77337	23.3769	0	0	8.17593	0	0	0		0.98	0.19
ERR044829_ST1	100	100	100	44.0768	60.3234	12.2002	25.559	1.10914	0	8.41031	0	0	0		0.98	0.19
ERR044833_ST1	100	100	100	46.4715	61.4478	13.5916	25.5644	1.56389	0.0919741	8.82393	0	0	0		0.98	0.19
ERR125938_ST1	100	100	0.142682	29.1089	100	26.7605	24.7272	0.216282	0.6535	8.12078	0	0.557009	0.112409		0.98	0.19
ERR125940_ST1	100	100	0	29.3223	100	26.3223	24.7272	0.216282	0.745474	8.36895	0.579495	0.54013	0.0562047		0.98	0.19
ERR125941_ST1	100	100	0	29.7359	100	27.1833	24.5652	0.216282	0.818085	8.41031	0.579495	0.244746	0.112409		0.98	0.19
ERR125943_ST1	100	100	0	28.7086	100	26.3838	24.7434	0.216282	0.745474	8.39653	0.579495	0.54013	0.112409		0.98	0.19
ERR125944_ST1	100	100	0	28.3885	100	26.107	24.5814	0.216282	0.6535	8.24486	0.282318	0.489493	0.0562047		0.98	0.19
ERR125945_ST1	100	100	0.10871	29.6625	100	26.945	24.7866	0.105368	0.745474	7.83124	0.282318	0.54013	0.112409		0.98	0.19
ERR125946_ST1	100	100	0.163066	29.0755	100	27.3063	24.765	0.216282	0.6535	8.56197	0.282318	0.54013	0.112409		0.98	0.19
ERR125952_ST1	100	100	100	29.8759	3.48397	6.0655	24.4464	0.216282	0.745474	8.23108	0.579495	0.244746	0.112409		0.98	0.19
ERR125953_ST1	100	100	100	29.8493	3.59463	6.0655	24.4896	0.216282	0.745474	8.57576	0.579495	0.244746	0.112409		0.98	0.19
ERR125954_ST1	100	100	100	30.6097	3.58749	5.91943	24.8191	0.216282	0.750315	8.54819	0.579495	0.261625	0.112409		0.98	0.19
ERR125955_ST1	100	100	100	29.6958	3.59106	6.0655	24.468	0.216282	0.745474	8.50682	0.579495	0.244746	0.112409		0.98	0.19
ERR1544883_ST1	100	100	0	29.8893	100	26.9142	24.8029	0.216282	0.745474	9.30649	0.579495	0.54013	0.112409		0.98	0.19
ERR171284_ST1	100	100	100	28.682	2.9628	5.77337	23.1933	0	0	6.17675	0	0	0.692205		0.98	0.19
ERR1853181_ST1	100	100	0	27.2946	100	26.3223	23.7388	0.959406	0	7.29353	0	0.548569	0		0.98	0.19
ERR347960_ST1	100	100	0	26.4541	100	25.9456	23.0798	0	0	7.004	0	0.54013	0		0.98	0.19
ERR347964_ST1	100	100	0.428047	27.548	100	26.0609	23.1987	0	0	6.94885	0	0.54013	0.103535		0.98	0.19
ERR347971_ST1	100	100	100	42.2158	59.7059	11.639	25.451	0.91504	0	6.49386	0	0	0		0.98	0.19
ERR347975_ST1	100	100	100	42.6294	59.5381	11.8773	25.5374	1.13687	0	7.05915	0	0	0		0.98	0.19
ERR347976_ST1	100	100	100	28.1017	12.3867	31.6421	23.3715	0	0	7.16945	0	0.919909	0		0.98	0.19
ERR347977_ST1	100	100	0.801739	27.9416	100	26.1301	23.2149	0	0	6.85234	0	0.54013	0		0.98	0.19
ERR347984_ST1	100	100	0.163066	26.9344	100	26.0148	22.6207	0	0	7.21081	0	0.54013	0		0.98	0.19
ERR347985_ST1	100	100	0.366898	26.8343	100	25.9609	23.0582	0	0	7.12808	0	0.54013	0		0.98	0.19
ERR348053_ST1	100	100	0.237804	27.508	100	26.0839	23.2581	0	0	6.81097	0	0.54013	0		0.98	0.19
ERR348057_ST1	100	100	0.285365	26.3207	100	26.1608	23.4039	0	0	6.30084	0	0.54013	0.103535		0.98	0.19
ERR348064_ST1	100	100	100	42.416	59.3275	11.9465	25.5968	1.09805	0	6.85234	0	0	0		0.98	0.19
ERR348068_ST1	100	100	100	41.9357	59.7737	11.4237	25.424	0.743123	0	6.81097	0	0	0		0.98	0.19
ERR348069_ST1	100	100	100	28.0816	12.3474	31.9496	22.9772	0	0	7.10051	0	1.30813	0		0.98	0.19
ERR348070_ST1	100	100	0	27.2212	100	26.0993	22.934	0	0	7.30732	0	0.54013	0		0.98	0.19
ERR348077_ST1	100	100	0	27.6414	100	25.8687	23.069	0	0	6.13539	0	0.54013	0		0.98	0.19
ERR348078_ST1	100	100	0.631879	27.6281	100	26.2608	23.0528	0	0	6.90749	0	0.54013	0		0.98	0.19
ERR348081_ST1	100	100	100	43.5432	59.8486	12.1387	25.505	0.887311	0	6.86612	0	0	0		0.98	0.19
ERR502962_ST1	100	99.6669	100	41.2553	60.2841	9.80166	26.7851	1.5528	0.750315	9.66497	0.579495	0.261625	0.112409		0.98	0.19
ERR537821_ST1	100	99.6669	100	41.2553	60.2841	9.80166	26.7851	1.5528	0.750315	9.66497	0.579495	0.261625	0.112409		0.98	0.19
ERR658295_ST1	100	100	100	31.4101	2.9164	5.77337	23.3985	0	0.0242037	8.85151	0	0	0.742494		0.98	0.19
ERR658301_ST1	100	100	100	31.5368	2.95567	5.77337	23.4039	0	0	8.50682	0	0	0.79574		0.98	0.19
ERR658304_ST1	100	100	100	31.897	2.97351	5.77337	23.3553	0	0.271081	8.35516	0	0	0.79574		0.98	0.19
ERR658305_ST1	100	100	100	31.1566	2.95567	5.77337	23.3715	0.110914	0	8.71364	0	0	0.760243		0.98	0.19
ERR658306_ST1	100	100	100	30.583	2.95567	5.77337	23.3715	0	0	8.61712	0	0	0.78095		0.98	0.19
ERR658307_ST1	100	100	100	31.6502	2.9164	5.77337	23.4039	0	0	8.54819	0	0	0.79574		0.98	0.19
ERR658308_ST1	100	100	100	31.4168	2.95567	5.77337	23.3607	0	0	8.50682	0	0	0		0.98	0.19
ERR658309_ST1	100	100	100	31.877	3.00564	5.77337	23.3769	0	0	8.60334	0	0	0		0.98	0.19
ERR658310_ST1	100	100	100	31.1499	2.95567	5.77337	23.3823	0	0.271081	8.69985	0	0	0		0.98	0.19
ERR658311_ST1	100	100	100	32.0371	2.9521	5.77337	23.3769	0	0	8.755	0	0	0		0.98	0.19
ERR658312_ST1	100	100	100	32.3773	2.95923	5.78106	23.4309	0	0	8.79636	0	0	0		0.98	0.19
ERR658314_ST1	100	100	100	32.2972	2.95567	5.78106	23.4309	0	0	8.69985	0	0	0		0.98	0.19
ERR928288_ST1	100	100	0	27.6414	100	26.1147	23.62	0.216282	0.745474	8.05184	0.579495	0.244746	0.112409		0.98	0.19
ERR928304_ST1	100	100	0	26.3541	100	24.6541	23.4525	0.216282	0.745474	2.46794	0.579495	0.54013	0.112409		0.98	0.19
ERR928307_ST1	100	100	0	24.9133	100	25.5612	23.0852	0.216282	0.745474	4.21894	0.579495	0.54013	0.112409		0.98	0.19
ERR928308_ST1	100	100	0	26.1606	100	51.9526	23.6794	0.216282	0.745474	4.31546	0.579495	0.54013	0.112409		0.98	0.19
GCA_000210455.1_Clostridioides_difficile_2007855_Complete_Genome_ST1	100	100	0	27.448	100	25.3767	22.2156	0	0	0	0	0	0		0.98	0.19
SAMN03473811_ST1	100	100	0	28.7553	100	26.3761	24.5976	0.216282	0.275922	8.05184	0	0.548569	0.103535		0.98	0.19
SAMN03473812_ST1	100	100	0	28.6353	100	26.4068	24.1331	0	0.285604	7.77609	0	0.54013	0		0.98	0.19
SAMN03473813_ST1	100	100	0	29.2289	99.2825	26.5836	24.7704	0.110914	0.561526	7.99669	0.282318	0.54013	0.328354		0.98	0.19
SAMN03473816_ST1	100	100	0	28.8754	100	26.453	24.765	0.110914	0.6535	8.68606	0.282318	0.54013	0.112409		0.98	0.19
SAMN03473819_ST1	100	100	0	28.6886	100	26.3915	24.2141	0.110914	0.183948	7.58307	0	0.54013	0.112409		0.98	0.19
SAMN03473828_ST1	100	100	0	28.6486	100	26.4222	23.8144	0	0.285604	7.72094	0	0.54013	0		0.98	0.19
SRR2047584_ST1	100	100	0.434842	29.2956	99.2825	26.5298	24.6678	0.105368	0.45987	8.07942	0.579495	0.557009	0.310605		0.98	0.19
SRR2047585_ST1	100	100	0	29.0021	99.2825	26.4299	24.5976	0.110914	0.377578	7.77609	0.579495	0.54013	0.269191		0.98	0.19
SRR2047594_ST1	100	100	0.163066	29.3156	100	26.5913	24.9703	0	0.561526	8.6447	0.297177	0.573888	0.411182		0.98	0.19
SRR2047595_ST1	100	100	0	31.23	100	27.337	24.9811	0.110914	0.6535	8.05184	0	0.548569	0.464428		0.98	0.19
SRR2047596_ST1	100	100	0	28.8287	100	26.4991	24.2951	0.216282	0.469552	7.99669	0	0.54013	0.112409		0.98	0.19
SRR2047603_ST1	100	100	0	28.6686	100	26.5145	24.2357	0	0.45987	7.85882	0	0.54013	0.0562047		0.98	0.19
SRR2047823_ST1	100	100	0.0135888	29.6491	100	26.4453	24.3599	5.73425	0.275922	8.2035	0.297177	0.54013	0.2544		0.98	0.19
SRR2047842_ST1	100	100	0	28.9755	100	26.5145	24.2951	0.216282	0.0919741	7.45898	0	0.54013	0.245526		0.98	0.19
SRR2047849_ST1	100	100	1.01916	31.857	100	27.1525	25.1809	0.110914	0.6535	8.2035	0.297177	0.565449	0.405265		0.98	0.19
SRR4300562_ST1	100	100	0	34.0582	100	26.5452	23.9656	0.560115	0.890696	5.10134	0.579495	0.71736	0.115368		0.98	0.19
SRR4300563_ST1	100	100	0	30.5363	100	26.6144	23.9116	0.598935	0.910059	7.77609	0.579495	0.582328	0.112409		0.98	0.19
SRR4300578_ST1	100	100	0	30.056	100	26.1301	23.809	0.560115	0.900378	5.33572	0.579495	0.548569	0.112409		0.98	0.19
SRR4300579_ST1	100	100	0.129094	29.976	100	26.5606	24.3653	0.776398	0.9149	4.72908	0.579495	0.54013	0.112409		0.98	0.19
SRR4300580_ST1	100	100	0	29.0221	100	26.1224	23.9116	0.560115	0.905218	5.48738	0.579495	0.54013	0.177489		0.98	0.19
SRR5169300_ST1	100	100	0	27.1545	100	25.7611	23.4201	0.720941	0.3921	3.92941	0	0.54013	0.349061		0.98	0.19
SRR593294_ST1	100	100	100	44.6638	62.1546	13.4994	26.2936	1.5417	0.45987	8.61712	0.282318	0.270065	0.0562047		0.98	0.19
ERR1544880_ST1	100	100	0	29.8026	100	26.4606	24.0143	0.216282	0.745474	7.2246	0.579495	0.557009	0.112409		0.98	0.18
ERR125924_ST1	100	100	100	73.2057	64.0608	37.8844	23.2149	87.4834	12.7215	23.025	17.1917	0.464174	2.24819		0.87	1
ERR026843_ST1	100	100	100	23.8727	0.271293	0	19.8012	92.8072	10.7222	7.12808	0	0	0		0.15	0.96
ERR024996_ST1	100	100	0	23.8527	0.389091	0	42.3841	19.7981	0.881015	7.10051	0	0.489493	0		0.15	0.92
ERR024997_ST1	100	100	0	23.6393	0.367673	0	42.3625	19.7926	0.808404	7.01779	0	0.54013	0		0.15	0.92
ERR024998_ST1	100	100	0	23.5526	0.421218	0	42.3841	19.7815	1.05528	8.0932	0	0.54013	0		0.15	0.92
ERR024999_ST1	100	100	0	23.5326	0.367673	0	42.3355	19.787	0	6.38357	0	0	0		0.15	0.92
ERR025000_ST1	100	100	0	23.5659	0.374813	0	42.3517	19.787	0.450189	6.79719	0	0.54013	0		0.15	0.92
ERR025001_ST1	100	100	0	23.5659	0.378382	0	42.3787	19.7926	1.05044	7.77609	0	0.54013	0		0.15	0.92
ERR025002_ST1	100	100	0	23.5526	0.385522	0	42.3733	19.7926	1.19566	7.03157	0	0.54013	0		0.15	0.92
ERR025003_ST1	100	100	0	23.5259	0.356964	0	42.3463	19.7815	0.595411	5.91479	0	0	0		0.15	0.92
ERR025004_ST1	100	100	0	23.6326	0.353395	0	42.3733	19.787	1.17146	6.6731	0	0.54013	0		0.15	0.92
ERR025005_ST1	100	100	0	23.6926	0.367673	0	42.3301	19.787	0.338852	6.61795	0	0.54013	0		0.15	0.92
ERR025006_ST1	100	100	0	23.6126	0.374813	0	42.3625	19.7981	0.430826	7.2246	0	0.54013	0		0.15	0.92
ERR025007_ST1	100	100	0	23.6593	0.389091	0	42.3625	19.7926	0.779359	6.68689	0	0.54013	0		0.15	0.92
ERR025010_ST1	100	100	0	23.6726	0.424788	0	42.3733	19.7981	1.0456	7.80367	0	0.54013	0		0.15	0.92
ERR025011_ST1	100	100	0	23.5459	0.421218	0	42.3787	19.787	1.0698	7.95533	0	0	0		0.15	0.92
ERR025012_ST1	100	100	0	23.5059	0.374813	0	42.3355	19.787	0.319489	6.46629	0	0.54013	0		0.15	0.92
ERR025014_ST1	100	100	0	23.8194	0.392661	0	42.3787	19.7981	1.51031	8.50682	0	0.54013	0		0.15	0.92
ERR025015_ST1	100	100	0	23.5392	0.417648	0	42.3517	19.787	0.450189	7.85882	0	0.54013	0		0.15	0.92
ERR025016_ST1	100	100	0	23.5659	0.378382	0	42.3625	19.787	0.910059	6.96264	0	0.54013	0		0.15	0.92
ERR025017_ST1	100	100	0	23.6993	0.39623	0	42.3787	19.7926	1.34573	8.21729	0	0.54013	0		0.15	0.92
ERR025018_ST1	100	100	0	23.6793	0.367673	0	42.3247	19.787	0.314648	7.21081	0	0.54013	0		0.15	0.92
ERR025019_ST1	100	100	0	23.5526	0.389091	0	42.3841	19.7926	1.24407	6.99021	0	0.54013	0		0.15	0.92
ERR025020_ST1	100	100	0	23.8594	0.406939	0	42.3679	19.7926	1.14726	7.37626	0	0.54013	0		0.15	0.92
ERR025023_ST1	100	100	0	23.5192	0.360534	0	42.3571	19.787	0.430826	6.53523	0	0.54013	0		0.15	0.92
ERR025024_ST1	100	100	0	23.5392	0.353395	0	42.3787	19.787	0.740633	6.6731	0	0.54013	0		0.15	0.92
ERR025025_ST1	100	100	0	23.5059	0.360534	0	42.3355	19.7704	0.648659	5.73556	0	0.489493	0		0.15	0.92
ERR025026_ST1	100	100	0	23.5526	0.371243	0	42.3787	19.7926	0.401781	6.08024	0	0.54013	0		0.15	0.92
ERR025027_ST1	100	100	0	23.6593	0.364104	0	42.3463	19.787	0.208152	6.81097	0	0.54013	0		0.15	0.92
ERR025028_ST1	100	100	0	23.5259	0.360534	0	42.3463	19.7815	0.488915	6.83855	0	0.54013	0		0.15	0.92
ERR025029_ST1	100	100	0	23.5259	0.374813	0	42.3625	19.7815	0.421144	6.59038	0	0.489493	0		0.15	0.92
ERR025030_ST1	100	100	0	23.5526	0.374813	0	42.3355	19.7815	0.367896	6.25948	0	0.489493	0		0.15	0.92
ERR025031_ST1	100	100	0	23.3925	0.356964	0	42.3355	19.787	0	5.80449	0	0.489493	0		0.15	0.92
ERR025032_ST1	100	100	0	23.5326	0.367673	0	42.3409	19.787	0	6.70068	0	0.54013	0		0.15	0.92
ERR025033_ST1	100	100	0	23.6726	0.374813	0	42.3625	19.787	0.972989	7.01779	0	0.54013	0		0.15	0.92
ERR025035_ST1	100	100	0	23.5192	0.360534	0	42.3409	19.787	0.319489	6.06646	0	0.54013	0		0.15	0.92
ERR025036_ST1	100	100	0	23.766	0.385522	0	42.3625	19.7926	1.29732	8.18971	0	0.54013	0		0.15	0.92
ERR025038_ST1	100	100	0	23.7393	0.378382	0	42.3625	19.787	1.48611	8.38274	0	0.54013	0		0.15	0.92
ERR025039_ST1	100	100	0	23.6726	0.410509	0	42.3841	19.787	1.08917	8.3138	0	0.54013	0		0.15	0.92
ERR025040_ST1	100	100	0	23.5592	0.406939	0	42.3625	19.7926	0.716429	7.92775	0	0.54013	0		0.15	0.92
ERR025041_ST1	100	100	0	23.5792	0.356964	0	42.3625	19.787	0.561526	6.7834	0	0.54013	0		0.15	0.92
ERR025042_ST1	100	100	0	23.5326	0.353395	0	42.3625	19.787	0.401781	5.88722	0	0	0		0.15	0.92
ERR025043_ST1	100	100	0	23.5192	0.364104	0	42.3301	19.776	0.406622	5.99752	0	0	0		0.15	0.92
ERR025044_ST1	100	100	0	23.5192	0.360534	0	42.3463	19.787	0.663181	6.7834	0	0.54013	0		0.15	0.92
ERR025045_ST1	100	100	0	23.6259	0.371243	0	42.3733	19.787	0.842289	7.78988	0	0.54013	0		0.15	0.92
ERR025048_ST1	100	100	0	23.5259	0.367673	0	42.3787	19.7926	0.885855	6.99021	0	0.54013	0		0.15	0.92
ERR025049_ST1	100	100	0	23.5459	0.364104	0	42.3463	19.7815	0.406622	6.83855	0	0.54013	0		0.15	0.92
ERR025050_ST1	100	100	0	23.6726	0.385522	0	42.3679	19.787	1.22471	7.92775	0	0.489493	0		0.15	0.92
ERR025051_ST1	100	100	0	23.7193	0.389091	0	42.3517	19.787	0.406622	7.54171	0	0.54013	0		0.15	0.92
ERR025052_ST1	100	100	0	23.6259	0.378382	0	42.3409	19.7926	0.547004	5.77692	0	0.54013	0		0.15	0.92
ERR025053_ST1	100	100	0	23.5125	0.367673	0	42.3301	19.7704	0.343693	3.29519	0	0	0		0.15	0.92
ERR025054_ST1	100	100	0	23.5592	0.353395	0	42.3787	19.787	0.5228	6.27327	0	0	0		0.15	0.92
ERR025055_ST1	100	100	0	23.7126	0.364104	0	42.3625	19.7926	0.585729	7.004	0	0	0		0.15	0.92
ERR025056_ST1	100	100	0	23.5326	0.385522	0	42.3409	19.787	0.561526	6.1216	0	0.54013	0		0.15	0.92
ERR025058_ST1	100	100	0	23.5326	0.367673	0	42.3517	19.787	0.677704	7.1143	0	0.54013	0		0.15	0.92
ERR025059_ST1	100	100	0	23.6259	0.353395	0	42.3517	19.787	0.421144	5.65283	0	0.54013	0		0.15	0.92
ERR025061_ST1	100	100	0	23.5726	0.371243	0	42.3571	19.787	0.411463	6.99021	0	0.54013	0		0.15	0.92
ERR025062_ST1	100	100	0	23.5726	0.417648	0	42.3463	19.787	0.9149	7.85882	0	0.54013	0		0.15	0.92
ERR025063_ST1	100	100	0	23.5592	0.353395	0	42.3679	19.7926	0.638978	6.42493	0	0.54013	0		0.15	0.92
ERR025064_ST1	100	100	0	23.5792	0.374813	0	42.3625	19.787	1.00203	7.10051	0	0.54013	0		0.15	0.92
ERR025065_ST1	100	100	0	23.6326	0.389091	0	42.3787	19.7926	0.861652	6.8937	0	0.54013	0		0.15	0.92
ERR025066_ST1	100	100	0	23.6459	0.392661	0	42.3841	19.7926	0.421144	8.27244	0	0.54013	0		0.15	0.92
ERR025069_ST1	100	100	0	23.5059	0.374813	0	42.3409	19.787	0.343693	5.48738	0	0.489493	0		0.15	0.92
ERR025070_ST1	100	100	0	23.5326	0.353395	0	42.3517	19.7815	0.295285	6.5628	0	0.54013	0		0.15	0.92
ERR025072_ST1	100	100	0	23.706	0.410509	0	42.3409	19.7704	0.382418	6.63174	0	0.54013	0		0.15	0.92
ERR025330_ST1	100	100	0	23.5125	0.321268	0	42.3355	19.7704	0.367896	5.70798	0	0.54013	0		0.15	0.92
ERR025331_ST1	100	100	0	23.5059	0.353395	0	42.3301	19.7704	0	0.965118	0	0	0		0.15	0.92
ERR025332_ST1	100	100	0	23.5059	0.353395	0	42.3355	19.7704	0	4.94968	0	0	0		0.15	0.92
ERR025333_ST1	100	100	0	23.5192	0.353395	0	42.3355	19.7815	0.401781	6.46629	0	0	0		0.15	0.92
ERR025334_ST1	100	100	0	23.5259	0.353395	0	42.3733	19.7815	0.406622	6.64553	0	0	0		0.15	0.92
ERR025335_ST1	100	100	0	23.5059	0.353395	0	42.3517	19.787	0.363055	6.61795	0	0.489493	0		0.15	0.92
ERR025336_ST1	100	100	0	23.5259	0.353395	0	42.3517	19.7815	0.643818	5.76313	0	0.489493	0		0.15	0.92
ERR025337_ST1	100	100	0	23.5059	0.356964	0	42.3463	19.7704	0	4.4809	0	0.489493	0		0.15	0.92
ERR025338_ST1	100	100	0	23.5125	0.385522	0	42.3409	19.7815	0.32917	5.73556	0	0	0		0.15	0.92
ERR025340_ST1	100	100	0	23.5125	0.356964	0	42.3247	19.787	0	6.1216	0	0.54013	0		0.15	0.92
ERR025341_ST1	100	100	0	23.5059	0.356964	0	42.3355	19.7704	0.551844	5.98373	0	0	0		0.15	0.92
ERR029538_ST1	100	100	0	23.806	0.542586	0	42.3733	19.787	1.50063	7.05915	0	0	0.0562047		0.15	0.92
ERR125978_ST1	100	100	100	24.2263	0.717498	0.292128	42.9567	26.4086	6.4285	7.23838	0.579495	1.01274	0.17453		0.15	0.92
ERR251734_ST1	100	100	100	23.9461	1.15656	0.146064	31.2898	100	1.21503	7.36247	0	0.244746	0		0.15	0.92
ERR251751_ST1	100	100	100	23.8327	1.06732	0.146064	31.1386	100	1.27311	7.3349	0.297177	0.244746	0.112409		0.15	0.92
ERR251790_ST1	100	1.81484	0.353309	23.6926	1.09945	0.292128	31.5437	100	1.4377	0.537709	0	0	0.0562047		0.15	0.92
ERR347724_ST1	100	100	100	23.7193	0.214179	0	41.979	21.2123	4.10979	7.03157	0	0	0		0.15	0.92
ERR347967_ST1	100	100	100	23.8327	0.681802	3.13653	42.3895	19.787	0.517959	7.004	0	0	0		0.15	0.92
ERR348060_ST1	100	100	100	23.7527	0.663954	3.18266	42.3949	19.7926	0.948785	6.83855	0	0	0		0.15	0.92
ERR928310_ST1	100	100	100	24.4597	0.778182	0.292128	42.9567	21.362	4.28405	4.09486	0.579495	0.244746	0.112409		0.15	0.92
ERR928311_ST1	100	100	100	24.4597	0.849575	0.292128	42.9567	21.362	4.03718	1.77857	0.579495	0.244746	0.112409		0.15	0.92
ERR928312_ST1	100	100	100	24.453	0.778182	0.292128	42.9567	21.3676	4.17756	4.43954	0.579495	0.244746	0.112409		0.15	0.92
ERR248760_ST1	100	100	100	23.6926	0.271293	0.453567	19.8012	25.7043	0	7.07294	0	0	0		0.15	0.48
ERR026374_ST1	100	100	100	24.6265	59.1169	0.868696	19.8012	0.737578	0	6.75583	0	0.396658	0		0.2	0.19
ERR024642_ST1	100	100	100	24.1529	1.75626	0.292128	20.8545	0.110914	0.275922	7.58307	0.282318	0.244746	0		0.15	0.19
ERR024643_ST1	100	100	100	23.8661	0.553295	0.146064	19.9039	0	0.0919741	7.58307	0.282318	0.17723	0		0.15	0.19
ERR024646_ST1	100	100	100	24.0995	0.514029	0	20.1199	0.110914	0.101656	7.56928	0	0	0		0.15	0.19
ERR024647_ST1	100	100	100	23.9728	0.489041	0	20.8329	0.110914	0.367896	7.59686	0.282318	0.244746	6.10265		0.15	0.19
ERR024648_ST1	100	100	100	23.9928	0.410509	0.146064	19.9741	0	0.0919741	7.34868	0	0.143472	0		0.15	0.19
ERR024649_ST1	100	100	100	23.9594	0.646106	0.146064	20.3252	0.221828	0.183948	7.41762	0.282318	0	6.25055		0.15	0.19
ERR024650_ST1	100	100	100	24.2463	0.631827	0.146064	20.498	0.221828	0.367896	7.73473	0	0.18567	6.06419		0.15	0.19
ERR024651_ST1	100	100	100	24.1129	0.606839	0.292128	20.5466	0.110914	0.367896	7.65201	0	0.244746	6.22985		0.15	0.19
ERR024652_ST1	100	100	100	23.8461	0.50332	0.146064	20.7951	0.110914	0.19363	7.62443	0	0.244746	0		0.15	0.19
ERR024653_ST1	100	100	100	24.1129	0.631827	0.146064	20.6384	0	0.377578	6.96264	0	0.244746	0		0.15	0.19
ERR024655_ST1	100	100	100	24.1062	0.90669	0.146064	20.6492	0.216282	0.367896	8.16214	0.579495	0.244746	0.112409		0.15	0.19
ERR024656_ST1	100	100	100	23.9995	0.374813	0	20.3306	0	0.285604	7.51413	0.282318	0	0		0.15	0.19
ERR024657_ST1	100	100	100	23.8861	0.314129	0	20.0065	0	0.0919741	7.29353	0	0	0		0.15	0.19
ERR024659_ST1	100	100	100	24.2396	0.653245	0.292128	20.7627	0.110914	0.469552	7.99669	0.297177	0.244746	0.0562047		0.15	0.19
ERR024660_ST1	100	100	100	24.0128	0.353395	0.146064	20.444	0.110914	0.275922	7.37626	0	0.18567	0.112409		0.15	0.19
ERR024661_ST1	100	100	100	23.9728	0.414079	0.146064	20.4602	0.221828	0.271081	7.26596	0	0	5.93108		0.15	0.19
ERR024662_ST1	100	100	100	23.8927	0.285571	0.146064	20.2657	0	0	6.87991	0	0.210988	0		0.15	0.19
ERR024663_ST1	100	100	100	23.5125	0.214179	0	19.9093	0	0	5.91479	0	0	0		0.15	0.19
ERR024664_ST1	100	100	100	24.1062	0.489041	0.146064	20.2117	0	0.275922	7.3349	0.297177	0	0.0562047		0.15	0.19
ERR024665_ST1	100	100	100	24.0728	0.560434	0.146064	20.4224	0.110914	0.285604	7.56928	0.297177	0.244746	0		0.15	0.19
ERR024666_ST1	100	100	100	24.2596	0.767473	0.146064	20.9625	0	0.469552	8.16214	0	0.194109	0.0562047		0.15	0.19
ERR025343_ST1	100	0	0	27.7882	0.217748	0	19.8066	0	0	0	0	0	0		0.15	0.19
ERR025344_ST1	100	100	100	23.666	0.224888	0	19.8012	0	0	7.72094	0	0	0		0.15	0.19
ERR025345_ST1	100	100	100	23.666	0.235596	0	19.8012	0	0	7.91397	0	0	0		0.15	0.19
ERR025346_ST1	100	100	100	23.726	0.271293	0	19.8012	0	0	7.1143	0	0	0		0.15	0.19
ERR025347_ST1	100	100	100	23.8127	0.224888	0	19.812	0	0	7.85882	0	0	0		0.15	0.19
ERR025348_ST1	100	100	100	23.6793	0.224888	0	19.8012	0	0	8.01048	0	0	0		0.15	0.19
ERR025350_ST1	100	100	100	23.806	0.214179	0	19.8012	0	0	6.79719	0	0	0.644875		0.15	0.19
ERR025351_ST1	100	100	100	23.3124	0.239166	0	19.7148	0	0	8.13457	0	0	0		0.15	0.19
ERR025352_ST1	100	100	100	23.5592	0.221318	0	19.8012	0	0	6.94885	0	0	0		0.15	0.19
ERR025353_ST1	100	100	100	23.7793	0.278432	0	19.8012	0	0	7.23838	0	0	0		0.15	0.19
ERR025354_ST1	100	100	100	23.7727	0.221318	0	19.8012	0	0	7.59686	0	0	0		0.15	0.19
ERR026352_ST1	100	0	0	23.826	0.214179	0	19.8066	0	0	0	0	0	0		0.15	0.19
ERR026354_ST1	100	100	100	23.5726	0.214179	0	19.8066	0	0	6.75583	0	0	0		0.15	0.19
ERR026355_ST1	100	100	100	23.099	0.214179	0	19.3583	0	0	6.46629	0	0	0		0.15	0.19
ERR026356_ST1	100	100	100	23.8127	0.214179	0	19.812	0	0	6.6731	0	0	0		0.15	0.19
ERR026357_ST1	100	100	100	36.7396	52.9235	3.47478	32.8076	0.332742	0	8.34138	0	0	0.730661		0.15	0.19
ERR026358_ST1	100	100	100	23.6193	0.221318	0	19.8012	0	0	6.57659	0	0	0		0.15	0.19
ERR026359_ST1	100	100	100	23.5192	0.214179	0	19.8066	0	0	5.90101	0	0	0		0.15	0.19
ERR026360_ST1	100	100	100	22.8388	0.214179	0	18.9964	0	0	6.38357	0	0	0		0.15	0.19
ERR026361_ST1	100	100	100	23.6993	0.221318	0	19.8012	0	0	7.99669	0	0	0		0.15	0.19
ERR026362_ST1	100	100	100	23.6993	0.214179	0	19.8012	0	0	6.75583	0	0	0		0.15	0.19
ERR026363_ST1	100	100	100	23.7193	0.274863	0	19.8066	0	0	7.83124	0	0	0		0.15	0.19
ERR026365_ST1	100	100	100	23.7126	0.224888	0	19.8066	0	0	7.2246	0	0	0		0.15	0.19
ERR026366_ST1	100	100	100	23.5792	0.221318	0	19.8012	0	0	6.68689	0	0	0		0.15	0.19
ERR026367_ST1	100	100	100	23.826	0.271293	0	19.8066	0	0	8.07942	0	0	0		0.15	0.19
ERR026368_ST1	100	100	100	23.7126	0.214179	0	19.8012	0	0	7.03157	0	0	0		0.15	0.19
ERR026369_ST1	100	100	100	23.6793	0.217748	0	19.8012	0	0	7.18323	0	0	0		0.15	0.19
ERR026370_ST1	100	100	100	23.8661	0.235596	0	19.8012	0	0	8.18971	0	0	0		0.15	0.19
ERR026371_ST1	100	100	100	23.6526	0.224888	0	19.8012	0	0	7.92775	0	0	0		0.15	0.19
ERR026372_ST1	100	100	100	23.8461	0.224888	0	19.8012	0	0	6.72825	0	0	0		0.15	0.19
ERR026373_ST1	100	100	100	23.0656	0.214179	0	19.0234	0	0	6.70068	0	0	0		0.15	0.19
ERR026375_ST1	100	100	100	23.806	0.221318	0	19.812	0	0	6.7834	0	0	0		0.15	0.19
ERR026376_ST1	100	100	100	23.7327	0.235596	0	19.8012	0	0	7.90018	0	0	0		0.15	0.19
ERR026378_ST1	100	100	100	23.8794	0.235596	0	19.8012	0	0	8.58955	0	0	0		0.15	0.19
ERR026379_ST1	100	100	100	23.666	0.221318	0	19.8012	0	0	7.004	0	0	0		0.15	0.19
ERR026380_ST1	100	100	100	23.8461	0.224888	0	19.8012	0	0	8.2035	0	0	0		0.15	0.19
ERR026381_ST1	100	100	100	23.8661	0.221318	0	19.8012	0	0	8.34138	0	0	0		0.15	0.19
ERR026382_ST1	100	100	100	23.826	0.235596	0	19.812	0	0	8.3138	0	0	0		0.15	0.19
ERR026383_ST1	100	100	100	23.5326	0.214179	0	19.8066	0	0	6.92127	0	0	0		0.15	0.19
ERR026384_ST1	100	100	100	23.7193	0.217748	0	19.8066	0	0	7.27975	0	0	0		0.15	0.19
ERR026386_ST1	100	100	100	23.4725	0.224888	0	19.2827	0	0	7.14187	0	0	0		0.15	0.19
ERR026387_ST1	100	100	100	23.7927	0.271293	0	19.8066	0	0	8.34138	0	0	0		0.15	0.19
ERR026388_ST1	100	100	100	23.7593	0.271293	0	19.8012	0	0	8.30001	0	0	0		0.15	0.19
ERR026389_ST1	100	100	100	23.8594	0.274863	0	19.812	0	0	7.99669	0	0	0		0.15	0.19
ERR026391_ST1	100	100	100	23.5859	0.228457	0	19.8012	0	0	8.13457	0	0	0		0.15	0.19
ERR026392_ST1	100	100	100	23.6526	0.214179	0	19.8012	0	0	7.10051	0	0	0		0.15	0.19
ERR026393_ST1	100	100	100	23.7327	0.221318	0	19.8012	0	0	8.16214	0	0	0		0.15	0.19
ERR026394_ST1	100	100	100	23.746	0.271293	0	19.8012	0	0	8.14835	0	0	0		0.15	0.19
ERR026395_ST1	100	100	100	23.5459	0.271293	0	19.8012	0	0	7.08672	0	0	0		0.15	0.19
ERR026396_ST1	100	100	100	23.706	0.224888	0	19.8012	0	0	8.05184	0	0	0		0.15	0.19
ERR026397_ST1	100	100	100	23.826	0.221318	0	19.8012	0	0	7.27975	0	0	0		0.15	0.19
ERR026398_ST1	100	100	100	23.5592	0.235596	0	19.8012	0	0	8.03805	0	0	0		0.15	0.19
ERR026399_ST1	100	100	100	23.2991	0.271293	0	19.7634	0	0	7.1143	0	0	0		0.15	0.19
ERR026400_ST1	100	100	100	23.8461	0.271293	0	19.8012	0	0	7.3349	0	0	0		0.15	0.19
ERR026401_ST1	100	100	100	23.8727	0.274863	0	19.8066	0	0	8.35516	0	0	0		0.15	0.19
ERR026402_ST1	100	0	0	23.7327	0.221318	0	19.812	0	0	0	0	0	0		0.15	0.19
ERR026404_ST1	100	100	100	23.7793	0.221318	0	19.8012	0	0	8.18971	0	0	0		0.15	0.19
ERR026405_ST1	100	100	100	23.8394	0.235596	0	19.8012	0	0	6.81097	0	0	0		0.15	0.19
ERR026406_ST1	100	0	0	23.726	0.221318	0	19.8012	0	0	0	0	0	0		0.15	0.19
ERR026407_ST1	100	0	0	23.4592	0.235596	0	19.8012	0	0	0	0	0	0		0.15	0.19
ERR026408_ST1	100	100	100	23.8394	0.214179	0	19.8066	0	0	6.79719	0	0	0		0.15	0.19
ERR026409_ST1	100	100	100	23.7994	0.274863	0	19.8012	0	0	6.64553	0	0	0		0.15	0.19
ERR026410_ST1	100	100	100	23.8394	0.224888	0	19.8012	0	0	8.02427	0	0	0		0.15	0.19
ERR026411_ST1	100	100	100	23.7527	0.271293	0	19.8012	0	0	7.95533	0	0	0		0.15	0.19
ERR026412_ST1	100	100	100	23.3258	0.221318	0	19.4501	0	0	8.18971	0	0	0		0.15	0.19
ERR026413_ST1	100	100	100	23.7727	0.221318	0	19.8012	0	0	7.8726	0	0	0		0.15	0.19
ERR026414_ST1	100	100	100	23.806	0.271293	0	19.8066	0	0	8.02427	0	0	0		0.15	0.19
ERR026415_ST1	100	100	100	23.7327	0.221318	0	19.8012	0	0	7.36247	0	0	0		0.15	0.19
ERR026417_ST1	100	100	100	23.7193	0.214179	0	19.8012	0	0	7.23838	0	0	0		0.15	0.19
ERR026418_ST1	100	100	100	23.5259	0.214179	0	19.8012	0	0.145222	8.79636	0	0	0		0.15	0.19
ERR026419_ST1	100	100	100	23.5259	0.214179	0	19.8066	0	0	7.72094	0	0	0		0.15	0.19
ERR026422_ST1	100	100	100	23.7793	0.221318	0	19.8066	0	0	8.5344	0	0	0		0.15	0.19
ERR026423_ST1	100	100	100	23.666	0.221318	0	19.8012	0	0	7.72094	0	0	0		0.15	0.19
ERR026424_ST1	100	100	100	23.5792	0.224888	0	19.8012	0	0	7.32111	0	0	0		0.15	0.19
ERR026426_ST1	100	100	100	23.5326	0.224888	0	19.8012	0	0	8.10699	0	0	0		0.15	0.19
ERR026830_ST1	100	100	100	23.8594	0.235596	0	19.8012	0	0	7.07294	0	0	0		0.15	0.19
ERR026831_ST1	100	100	100	23.7126	0.224888	0	19.8012	0	0	7.90018	0	0	0		0.15	0.19
ERR026832_ST1	100	100	100	23.7126	0.221318	0	19.8012	0	0	7.69337	0	0	0		0.15	0.19
ERR026833_ST1	100	100	100	23.8394	0.214179	0	19.8012	0	0	7.14187	0	0	0.0562047		0.15	0.19
ERR026834_ST1	100	100	100	23.7393	0.235596	0	19.8012	0	0	7.70716	0	0	0		0.15	0.19
ERR026835_ST1	100	100	100	23.9461	0.221318	0	19.812	0	0	7.94154	0	0	0.0562047		0.15	0.19
ERR026836_ST1	100	100	100	23.8461	0.289141	0	19.812	0	0	7.94154	0	0	0		0.15	0.19
ERR026837_ST1	100	100	100	23.746	0.271293	0	19.8012	0	0.0919741	8.32759	0	0	0		0.15	0.19
ERR026838_ST1	100	100	100	23.8194	0.221318	0	19.8012	0	0	8.45168	0	0	0		0.15	0.19
ERR026839_ST1	100	100	100	23.706	0.214179	0	19.8066	0	0	7.12808	0	0	0		0.15	0.19
ERR026840_ST1	100	100	100	23.766	0.274863	0	19.8012	0	0	7.14187	0	0	0		0.15	0.19
ERR026841_ST1	100	0.0506343	0	23.7193	0.221318	0	19.8012	0	0	0	0	0	0		0.15	0.19
ERR026844_ST1	100	100	100	23.8194	0.217748	0	19.8012	0	0	7.95533	0	0	0		0.15	0.19
ERR026845_ST1	100	100	100	23.8527	0.271293	0	19.8012	0	0	8.12078	0	0	0		0.15	0.19
ERR026847_ST1	100	100	100	23.7527	0.224888	0	19.8012	0	0	8.41031	0	0	0		0.15	0.19
ERR026849_ST1	100	100	100	23.7193	0.235596	0	19.8012	0	0	6.7834	0	0	0		0.15	0.19
ERR026850_ST1	100	100	100	23.7393	0.224888	0	19.8012	0	0	7.81745	0	0	0		0.15	0.19
ERR026852_ST1	100	100	100	23.8194	0.214179	0	19.8012	0	0	6.92127	0	0	0.499926		0.15	0.19
ERR026856_ST1	100	100	100	23.8727	0.224888	0	19.8066	0	0	7.3349	0	0	0		0.15	0.19
ERR026857_ST1	100	100	100	23.706	0.221318	0	19.8012	0	0	7.90018	0	0	0		0.15	0.19
ERR026858_ST1	100	100	100	23.6926	0.214179	0	19.8012	0	0	6.4525	0	0	0		0.15	0.19
ERR026859_ST1	100	100	100	23.5125	0.221318	0	19.6932	0	0	6.87991	0	0	0		0.15	0.19
ERR026861_ST1	100	100	100	23.8527	0.235596	0	19.8066	0	0	8.27244	0	0	0		0.15	0.19
ERR026862_ST1	100	100	100	23.686	0.214179	0	19.8012	0	0	7.41762	0	0	0		0.15	0.19
ERR026863_ST1	100	100	100	23.8594	0.271293	0	19.8066	0	0	8.39653	0	0	0		0.15	0.19
ERR026864_ST1	100	100	100	23.7527	0.221318	0	19.8012	0	0	7.76231	0	0	0		0.15	0.19
ERR026865_ST1	100	100	100	23.726	0.224888	0	19.8012	0	0	8.12078	0	0	0		0.15	0.19
ERR026866_ST1	100	100	100	23.8861	0.239166	0	19.8174	0	0	8.57576	0	0	0		0.15	0.19
ERR026867_ST1	100	100	100	23.806	0.221318	0	19.8012	0	0	7.85882	0	0	0		0.15	0.19
ERR026869_ST1	100	100	100	24.0195	0.292711	0	19.8012	0	0	8.50682	0	0	0		0.15	0.19
ERR026870_ST1	100	100	100	23.706	0.235596	0	19.812	0	0	6.86612	0	0	0		0.15	0.19
ERR026871_ST1	100	100	100	23.8594	0.271293	0	19.8012	0	0	8.35516	0	0	0		0.15	0.19
ERR026872_ST1	100	100	100	23.6393	0.271293	0	19.65	0	0	7.40383	0	0	0		0.15	0.19
ERR026873_ST1	100	100	100	23.826	0.221318	0	19.8012	0	0	6.99021	0	0	0		0.15	0.19
ERR026874_ST1	100	100	100	23.7527	0.224888	0	19.8012	0	0	7.12808	0	0	0		0.15	0.19
ERR026875_ST1	100	100	100	23.8727	0.235596	0	19.8012	0	0	8.16214	0	0	0		0.15	0.19
ERR026876_ST1	100	100	100	24.1395	0.221318	0	19.8012	0	0	8.43789	0	0	0.789824		0.15	0.19
ERR026877_ST1	100	100	100	23.8527	0.271293	0	19.8012	0	0	7.10051	0	0	0		0.15	0.19
ERR026878_ST1	100	99.9947	98.0908	23.3925	0.214179	0	20.8167	0	0	2.27492	0	0	0		0.15	0.19
ERR026879_ST1	100	100	100	23.7727	0.221318	0	19.8012	0	0	6.65931	0	0	0		0.15	0.19
ERR026880_ST1	100	100	100	23.7327	0.235596	0	19.8066	0	0	8.39653	0	0	0		0.15	0.19
ERR027376_ST1	100	100	100	24.1862	2.32741	0.292128	20.7357	0.571207	0.561526	8.05184	0.282318	0.244746	0.112409		0.15	0.19
ERR027377_ST1	100	100	100	23.9594	0.785322	0.292128	20.9625	0.216282	0.561526	8.13457	0.282318	0.244746	0.112409		0.15	0.19
ERR027385_ST1	100	100	100	24.0995	4.04798	0.292128	21.0381	1.02041	0.561526	7.70716	0.579495	0.244746	0.95548		0.15	0.19
ERR027386_ST1	100	100	100	23.9661	0.856714	0.292128	20.7357	0.249556	0.469552	7.59686	0.579495	0.244746	0.769117		0.15	0.19
ERR028721_ST1	100	100	100	23.5792	0.217748	0	19.8012	0	0	6.90749	0	0	0		0.15	0.19
ERR028722_ST1	100	100	100	23.6793	0.235596	0	19.8012	0	0	7.18323	0	0	0		0.15	0.19
ERR028723_ST1	100	0	0	23.8527	0.306989	0	19.8012	0	0	0	0	0	0		0.15	0.19
ERR028724_ST1	100	100	100	23.8594	0.224888	0	19.8012	0	0	8.45168	0	0	0		0.15	0.19
ERR028725_ST1	100	100	100	23.8594	0.214179	0	19.8066	0	0	7.08672	0	0	0		0.15	0.19
ERR028726_ST1	100	100	100	23.6393	0.221318	0	19.8066	0	0	7.84503	0	0	0		0.15	0.19
ERR028727_ST1	100	100	100	23.8594	0.271293	0	19.8066	0	0	7.30732	0	0	0		0.15	0.19
ERR028728_ST1	100	100	100	23.8194	0.235596	0	19.812	0	0	6.99021	0	0	0		0.15	0.19
ERR028729_ST1	100	100	100	23.4125	0.221318	0	19.8012	0	0	7.43141	0	0	0		0.15	0.19
ERR028730_ST1	100	100	100	23.8527	0.235596	0	19.8012	0	0	7.19702	0	0	0		0.15	0.19
ERR028731_ST1	100	100	100	23.8461	0.235596	0	19.812	0	0	8.17593	0	0	0		0.15	0.19
ERR028732_ST1	100	100	100	23.6193	0.235596	0	19.8012	0	0	6.93506	0	0	0		0.15	0.19
ERR029481_ST1	100	100	100	23.8527	0.30342	0	19.9039	0	0	8.755	0	0	0.0562047		0.15	0.19
ERR029482_ST1	100	100	100	23.7393	0.235596	0	19.8012	0	0	8.12078	0	0	0		0.15	0.19
ERR029483_ST1	100	100	100	23.766	0.285571	0	19.8012	0	0.285604	8.25865	0	0	0		0.15	0.19
ERR029484_ST1	100	0.223857	0	23.726	0.278432	0	19.8012	0	0	0	0	0	0		0.15	0.19
ERR029485_ST1	100	100	100	23.826	0.217748	0	19.8066	0	0	8.2035	0	0	0		0.15	0.19
ERR029486_ST1	100	100	100	23.8661	0.29628	0	19.8066	0	0	8.36895	0	0	0.449638		0.15	0.19
ERR029487_ST1	100	100	100	23.7527	0.221318	0	19.8066	0	0	8.45168	0	0	0		0.15	0.19
ERR029488_ST1	100	100	100	23.7527	0.285571	0	19.8012	0	0	8.34138	0	0	0		0.15	0.19
ERR029489_ST1	100	100	100	23.2324	0.235596	0	19.5096	0	0	8.61712	0	0	0.0562047		0.15	0.19
ERR029490_ST1	100	100	100	23.8661	0.274863	0	19.8012	0	0	7.21081	0	0	0		0.15	0.19
ERR029491_ST1	100	100	100	23.8661	0.371243	0	20.0011	0	0	8.34138	0	0	0		0.15	0.19
ERR029492_ST1	100	100	100	23.8461	0.360534	0	19.8066	0	0	8.61712	0	0	0		0.15	0.19
ERR029494_ST1	100	100	100	23.8661	0.271293	0	19.8012	0	0	8.50682	0	0	0		0.15	0.19
ERR029495_ST1	100	100	100	23.8461	0.271293	0	19.8012	0	0.0919741	8.3138	0	0	0		0.15	0.19
ERR029496_ST1	100	100	100	23.7327	0.221318	0	19.8066	0	0.0919741	8.2035	0	0	0		0.15	0.19
ERR029497_ST1	100	100	100	24.0728	0.214179	0	19.9093	0	0.0968148	8.3138	0	0.244746	0		0.15	0.19
ERR029498_ST1	100	100	100	23.8527	0.235596	0	19.8012	0	0	7.36247	0	0	0.0562047		0.15	0.19
ERR029499_ST1	100	100	100	23.8927	0.292711	0.146064	19.8012	0	0	8.45168	0	0	0		0.15	0.19
ERR029500_ST1	100	100	100	23.9594	0.235596	0	19.9039	0	0	8.03805	0	0.194109	0		0.15	0.19
ERR029501_ST1	100	100	100	23.7593	0.224888	0	19.8012	0	0	8.12078	0	0	0		0.15	0.19
ERR029502_ST1	100	100	100	23.8194	0.367673	0	20.0713	0	0.0919741	8.16214	0	0	0.766159		0.15	0.19
ERR029503_ST1	100	100	100	23.8794	0.235596	0	20.0065	0	0	8.38274	0	0	0.0562047		0.15	0.19
ERR029504_ST1	100	100	100	23.9861	0.339116	0	19.8012	0	0.0919741	8.39653	0	0	0		0.15	0.19
ERR029505_ST1	100	100	100	23.8527	0.271293	0	19.8066	0	0	8.46546	0	0	0		0.15	0.19
ERR029508_ST1	100	0.135913	0	23.7327	0.521168	0.238315	19.8012	0.110914	0.183948	0	0	0	0		0.15	0.19
ERR029509_ST1	100	100	100	23.8794	0.442636	0	20.0065	0	0.183948	8.32759	0.297177	0.135032	0.0562047		0.15	0.19
ERR029510_ST1	100	1.05799	0	23.8127	0.585422	0.146064	20.2387	0.105368	0.183948	0	0.282318	0	0.0562047		0.15	0.19
ERR029513_ST1	100	100	100	23.7793	0.364104	0.146064	20.1091	0	0.275922	7.51413	0	0	0.0562047		0.15	0.19
ERR029515_ST1	100	0.826138	0	23.4458	0.560434	0.146064	20.1091	0.110914	0.285604	0	0	0	0.0562047		0.15	0.19
ERR029516_ST1	100	100	100	24.0328	0.221318	0	19.9633	0.216282	0.101656	8.83772	0	0	0		0.15	0.19
ERR029520_ST1	100	1.02601	0.176654	24.1062	0.439066	0	20.6168	0.110914	0.183948	0	0	0	0.0562047		0.15	0.19
ERR029523_ST1	100	100	100	24.0595	0.353395	0	19.9093	0.110914	0.0919741	7.34868	0	0	0		0.15	0.19
ERR029524_ST1	100	0.767509	0	23.8861	0.282002	0	20.0065	0	0.0919741	0	0	0	0		0.15	0.19
ERR029525_ST1	100	0.940731	0	23.9528	0.442636	0.146064	20.2171	0	0.0919741	0.261961	0	0	0.0562047		0.15	0.19
ERR029526_ST1	100	0.919412	0	23.8861	0.339116	0	19.8066	0	0	0	0	0	0.0562047		0.15	0.19
ERR029527_ST1	100	0.3118	0	23.8594	0.414079	0	20.2171	0	0.275922	0	0	0	0.062121		0.15	0.19
ERR029528_ST1	100	0.738194	0.326131	24.1529	57.4463	0.146064	20.2819	0.55457	0.183948	0.261961	0	0	0.289898		0.15	0.19
ERR029529_ST1	100	0.250506	0	24.2463	0.381952	0.146064	19.9093	0	0.285604	0	0	0	0.0562047		0.15	0.19
ERR029531_ST1	100	100	100	23.9728	0.235596	0	19.9039	0	0.0919741	7.37626	0	0	0.0562047		0.15	0.19
ERR029533_ST1	100	100	100	23.8661	0.506889	0	20.39	0	0.0871333	8.755	0	0	0.0562047		0.15	0.19
ERR029534_ST1	100	100	100	23.9795	0.364104	0	19.9093	0	0	8.61712	0	0	0		0.15	0.19
ERR029535_ST1	100	100	100	23.8327	0.235596	0	19.8823	0.110914	0	8.61712	0	0	0		0.15	0.19
ERR029536_ST1	100	100	100	24.0662	0.292711	0	19.9039	0	0.285604	7.54171	0	0	0		0.15	0.19
ERR029537_ST1	100	0.221192	0	23.9394	0.289141	0	20.0173	0	0.0919741	0	0	0	0.118326		0.15	0.19
ERR029540_ST1	100	100	100	23.7393	0.428357	0	19.8012	0	0	7.34868	0	0	0		0.15	0.19
ERR029541_ST1	100	0.351775	0	23.5059	0.224888	0	19.9039	0	0.183948	0.275748	0	0	0		0.15	0.19
ERR029542_ST1	100	100	100	23.8194	0.30342	0	20.1145	0	0.0919741	7.34868	0	0	0.0562047		0.15	0.19
ERR029544_ST1	100	100	100	23.8994	0.217748	0.146064	19.9093	0	0.0919741	8.58955	0	0	0		0.15	0.19
ERR030283_ST1	100	100	100	23.8461	0.289141	0	19.8012	0	0	7.41762	0	0	0		0.15	0.19
ERR030284_ST1	100	100	100	23.8461	0.271293	0	19.812	0	0	8.13457	0	0	0		0.15	0.19
ERR030285_ST1	100	100	100	23.7327	0.235596	0	19.8012	0	0	7.07294	0	0	0		0.15	0.19
ERR030286_ST1	100	100	100	23.6726	0.235596	0	19.8012	0	0	8.27244	0	0	0		0.15	0.19
ERR030287_ST1	100	100	100	23.8461	0.274863	0	19.8012	0	0	8.34138	0	0	0		0.15	0.19
ERR030288_ST1	100	100	100	23.826	0.235596	0	19.9039	0	0.0919741	8.49304	0	0	0		0.15	0.19
ERR030289_ST1	100	100	100	23.8594	0.214179	0	19.8012	0	0	6.8937	0	0	0.638959		0.15	0.19
ERR030290_ST1	100	100	100	23.706	0.221318	0	19.8012	0	0	6.97642	0	0	0		0.15	0.19
ERR030291_ST1	100	100	100	23.4792	0.271293	0	19.4934	0	0	8.85151	0	0	0		0.15	0.19
ERR030292_ST1	100	100	100	23.8194	0.349825	0	19.8012	0	0	8.2035	0	0	0		0.15	0.19
ERR030293_ST1	100	100	100	23.8461	0.271293	0	19.8012	0	0	8.06563	0	0	0.0562047		0.15	0.19
ERR030294_ST1	100	100	100	23.8127	0.224888	0	32.9696	0	0	7.26596	0	0	0		0.15	0.19
ERR030296_ST1	100	100	100	23.7593	0.29628	0	19.8012	0	0	7.25217	0	0	0		0.15	0.19
ERR030297_ST1	100	100	100	23.6993	0.221318	0	19.9039	0	0	6.76961	0	0	0		0.15	0.19
ERR030298_ST1	100	100	100	23.826	0.221318	0	19.8012	0	0	7.84503	0	0	0		0.15	0.19
ERR030299_ST1	100	100	100	23.8661	0.364104	0	19.8012	0	0.19363	7.36247	0	0	0		0.15	0.19
ERR030300_ST1	100	100	100	23.8194	0.235596	0	19.8012	0	0	7.23838	0	0	0		0.15	0.19
ERR030301_ST1	100	100	100	23.8661	0.271293	0	19.8066	0	0.0919741	7.2246	0	0.227867	0		0.15	0.19
ERR030302_ST1	100	100	100	23.8927	0.224888	0	19.8012	0	0	8.14835	0	0	0.0562047		0.15	0.19
ERR030303_ST1	100	100	100	23.8327	0.221318	0	19.8012	0	0	8.23108	0	0	0.751368		0.15	0.19
ERR030304_ST1	100	100	100	23.1924	0.271293	0	19.6122	0	0.19363	8.32759	0	0.202549	0.0562047		0.15	0.19
ERR030305_ST1	100	100	100	23.806	0.435497	0	19.8012	0	0	7.07294	0	0	0		0.15	0.19
ERR030306_ST1	100	100	100	23.8461	0.292711	0	20.0065	0	0	8.36895	0	0	0		0.15	0.19
ERR030307_ST1	100	100	100	23.826	0.224888	0	19.8012	0	0.0919741	8.27244	0	0	0		0.15	0.19
ERR030309_ST1	100	100	100	23.826	0.271293	0	19.8012	0	0	7.08672	0	0	0		0.15	0.19
ERR030310_ST1	100	100	100	23.7527	0.224888	0	19.8012	0	0	7.32111	0	0	0		0.15	0.19
ERR030311_ST1	100	100	100	23.7593	0.217748	0	19.8012	0	0	7.04536	0	0	0		0.15	0.19
ERR030312_ST1	100	100	100	23.6926	0.214179	0	19.7688	0	0	8.4241	0	0	0		0.15	0.19
ERR030313_ST1	100	100	100	23.8461	0.217748	0	19.8012	0	0	7.2246	0	0	0		0.15	0.19
ERR030314_ST1	100	100	100	23.8461	0.271293	0	19.8012	0	0	8.0932	0	0	0		0.15	0.19
ERR030315_ST1	100	100	100	23.8461	0.224888	0	19.8012	0	0	6.96264	0	0	0		0.15	0.19
ERR030316_ST1	100	100	100	23.8594	0.221318	0	19.8066	0	0	7.36247	0	0	0		0.15	0.19
ERR030318_ST1	100	100	100	23.826	0.271293	0	19.8012	0	0	8.45168	0	0	0		0.15	0.19
ERR030319_ST1	100	0	0.10871	23.8594	0.224888	0	19.8012	0	0	0	0	0	0		0.15	0.19
ERR030320_ST1	100	100	100	23.726	0.271293	0	19.8012	0	0	8.35516	0	0	0		0.15	0.19
ERR030322_ST1	100	100	100	23.7593	0.224888	0	19.8012	0	0	7.9829	0	0	0		0.15	0.19
ERR030323_ST1	100	0	0	23.8594	0.235596	0	19.8066	0	0	0	0	0	0		0.15	0.19
ERR030325_ST1	100	0	0	23.4592	0.224888	0	19.7094	0	0	0	0	0	0		0.15	0.19
ERR030326_ST1	100	100	100	23.726	0.235596	0	19.8066	0	0	7.07294	0	0	0		0.15	0.19
ERR030327_ST1	100	100	100	23.8527	0.217748	0	19.8066	0	0	8.43789	0	0	0		0.15	0.19
ERR030328_ST1	100	100	100	23.7727	0.235596	0	19.8012	0	0	6.87991	0	0	0		0.15	0.19
ERR030329_ST1	100	100	100	23.766	0.224888	0	19.8012	0	0	7.26596	0	0	0		0.15	0.19
ERR030330_ST1	100	100	100	22.7255	0.214179	0	18.8884	0	0	8.50682	0	0	0		0.15	0.19
ERR030331_ST1	100	100	100	23.7727	0.271293	0	19.8012	0	0	8.25865	0	0	0.727703		0.15	0.19
ERR030333_ST1	100	0.543652	0	23.5392	0.235596	0	19.8066	0	0	0	0	0	0		0.15	0.19
ERR030335_ST1	100	100	100	24.1062	0.221318	0	19.8012	0	0	8.17593	0	0	0		0.15	0.19
ERR030336_ST1	100	100	100	23.766	0.271293	0	19.8012	0	0	8.38274	0	0	0		0.15	0.19
ERR030337_ST1	100	0	0	23.8527	0.221318	0	19.8012	0	0	0	0	0	0		0.15	0.19
ERR030338_ST1	100	100	100	22.3252	0.214179	0	18.7966	0	0	6.72825	0	0	0		0.15	0.19
ERR030339_ST1	100	0	0	23.8127	0.271293	0	19.8012	0	0	0	0	0	0		0.15	0.19
ERR030340_ST1	100	0	0	23.8461	0.221318	0	19.8012	0	0	0	0	0	0		0.15	0.19
ERR030341_ST1	100	0	0	23.6193	0.214179	0	19.8012	0	0	0	0	0	0		0.15	0.19
ERR030342_ST1	100	0	0	23.726	0.235596	0	19.8012	0	0	0	0	0	0		0.15	0.19
ERR030344_ST1	100	0	0	23.8461	0.214179	0	19.8012	0	0	0	0	0	0		0.15	0.19
ERR030345_ST1	100	0	0	23.726	0.235596	0	19.8012	0	0	0	0	0	0		0.15	0.19
ERR030346_ST1	100	100	100	23.7793	0.271293	0	19.8012	0	0	7.12808	0	0	0		0.15	0.19
ERR030348_ST1	100	100	100	23.5059	0.214179	0	19.8012	0	0	5.87343	0	0	0		0.15	0.19
ERR030349_ST1	100	100	100	23.5192	0.214179	0	19.8012	0	0	7.73473	0	0	0		0.15	0.19
ERR030350_ST1	100	100	100	23.5392	0.271293	0	19.8012	0	0	7.96912	0	0	0		0.15	0.19
ERR030351_ST1	100	99.9973	100	22.8855	0.214179	0	18.6399	0	0	6.93506	0	0	0		0.15	0.19
ERR030352_ST1	100	100	100	23.8661	0.271293	0	19.8066	0	0	7.25217	0	0	0		0.15	0.19
ERR030353_ST1	100	100	100	23.706	0.235596	0	19.8066	0	0	7.39005	0	0	0		0.15	0.19
ERR030354_ST1	100	100	100	23.8461	0.271293	0	19.8012	0	0	8.05184	0	0	0		0.15	0.19
ERR030355_ST1	100	100	100	23.706	0.224888	0	19.8066	0	0	6.97642	0	0	0		0.15	0.19
ERR030357_ST1	100	100	100	23.7193	0.221318	0	19.8012	0	0	8.30001	0	0	0		0.15	0.19
ERR030358_ST1	100	100	100	23.766	0.217748	0	19.8012	0	0	7.95533	0	0	0		0.15	0.19
ERR030359_ST1	100	0	0	23.8194	0.221318	0	19.812	0	0	0	0	0	0		0.15	0.19
ERR030361_ST1	100	100	100	23.7327	0.224888	0	19.8012	0	0	6.92127	0	0	0		0.15	0.19
ERR030362_ST1	100	100	100	23.8461	0.271293	0	19.8066	0	0	8.07942	0	0	0		0.15	0.19
ERR030363_ST1	100	100	100	23.826	0.235596	0	19.8012	0	0	6.83855	0	0	0		0.15	0.19
ERR030364_ST1	100	99.9813	100	22.1118	0.214179	0	18.9046	0	0	6.79719	0	0	0		0.15	0.19
ERR030365_ST1	100	100	100	23.7393	0.274863	0	19.8012	0	0	8.34138	0	0	0		0.15	0.19
ERR030366_ST1	100	100	100	23.8127	0.217748	0	19.8012	0	0	8.16214	0	0	0		0.15	0.19
ERR030367_ST1	100	100	100	23.7327	0.274863	0	19.8012	0	0	8.4241	0	0	0		0.15	0.19
ERR030368_ST1	100	0	0	23.8661	0.224888	0	19.8066	0	0	0	0	0	0		0.15	0.19
ERR030370_ST1	100	100	100	23.7327	0.235596	0	19.8012	0	0	8.35516	0	0	0		0.15	0.19
ERR030371_ST1	100	100	100	23.7193	0.271293	0	19.8012	0	0	8.10699	0	0	0		0.15	0.19
ERR030372_ST1	100	100	100	23.766	0.235596	0	19.8012	0	0	8.41031	0	0	0		0.15	0.19
ERR030374_ST1	100	100	100	24.2129	0.364104	0.146064	20.1145	0	0	8.61712	0	0	0.0562047		0.15	0.19
ERR030375_ST1	100	100	100	23.8861	0.221318	0	19.8012	0	0	8.39653	0	0	0.0562047		0.15	0.19
ERR030376_ST1	100	100	100	23.8527	0.224888	0	19.9039	0	0	7.14187	0	0	0.0562047		0.15	0.19
ERR030377_ST1	100	100	100	23.7126	0.217748	0	20.0065	0	0.183948	7.43141	0	0.210988	0		0.15	0.19
ERR030378_ST1	100	100	100	23.8461	0.342686	0	19.8012	0	0	8.13457	0	0	0		0.15	0.19
ERR030379_ST1	100	100	100	23.7527	0.306989	0	19.8066	0	0.0919741	7.32111	0	0	0		0.15	0.19
ERR030380_ST1	100	100	100	23.8594	0.217748	0	19.8066	0	0.0919741	7.04536	0	0	0		0.15	0.19
ERR030381_ST1	100	100	100	23.7193	0.224888	0	29.7451	0	0	8.12078	0	0	0.0562047		0.15	0.19
ERR030385_ST1	100	0.157233	0	23.826	0.29628	0	19.9039	0	0	0	0	0	0		0.15	0.19
ERR030387_ST1	100	100	100	23.8661	0.217748	0	19.8012	0	0	7.3349	0	0	0		0.15	0.19
ERR030388_ST1	100	100	100	23.7727	0.224888	0	19.8066	0	0	7.01779	0	0	0		0.15	0.19
ERR030389_ST1	100	100	100	23.8327	0.221318	0	19.8012	0	0	8.24486	0	0	0		0.15	0.19
ERR030390_ST1	100	100	100	23.7527	0.271293	0	19.7796	0	0	8.27244	0	0	0		0.15	0.19
ERR030391_ST1	100	100	100	23.826	0.224888	0	19.8066	0	0	8.25865	0	0	0		0.15	0.19
ERR030392_ST1	100	100	100	23.8461	0.214179	0	19.8012	0	0	8.2035	0	0	0		0.15	0.19
ERR030393_ST1	100	100	100	23.8594	0.224888	0	19.8012	0	0	8.30001	0	0	0		0.15	0.19
ERR030394_ST1	100	100	100	23.7727	0.485472	0	19.8066	0	0	7.99669	0	0	0		0.15	0.19
ERR030395_ST1	100	100	100	22.7855	0.214179	0	18.7534	0	0	8.43789	0	0	0		0.15	0.19
ERR030396_ST1	100	100	100	23.6993	0.235596	0	19.8012	0	0	7.34868	0	0	0		0.15	0.19
ERR030397_ST1	100	0	0.0543552	23.7193	0.221318	0	19.8012	0	0	0	0	0	0		0.15	0.19
ERR030398_ST1	100	100	100	23.826	0.235596	0	19.8066	0	0	7.30732	0	0	0		0.15	0.19
ERR031674_ST1	100	100	100	23.8527	0.29628	0	19.9093	0	0.183948	7.99669	0	0	0.851945		0.15	0.19
ERR031676_ST1	100	100	100	23.8327	0.274863	0	19.8012	0	0	8.32759	0	0	0		0.15	0.19
ERR031677_ST1	100	100	100	23.5926	0.292711	0	20.0065	0.105368	0.0919741	8.58955	0	0	0.0562047		0.15	0.19
ERR031678_ST1	100	100	100	23.8594	0.292711	0	19.9093	0.110914	0	7.66579	0.297177	0	0		0.15	0.19
ERR031680_ST1	100	100	100	23.8127	0.224888	0	19.812	0	0.101656	8.39653	0	0.244746	0		0.15	0.19
ERR031681_ST1	100	100	100	23.8861	0.30342	0	19.9147	0	0.101656	8.18971	0	0	0		0.15	0.19
ERR031682_ST1	100	100	100	22.8255	0.521168	0.146064	19.5852	0.110914	0.183948	8.43789	0	0.244746	0.0562047		0.15	0.19
ERR031683_ST1	100	100	100	23.746	0.224888	0	19.8012	0	0	8.76879	0	0	0		0.15	0.19
ERR031685_ST1	100	100	100	23.8727	0.381952	0	19.9903	0	0.0919741	8.35516	0	0	0		0.15	0.19
ERR031687_ST1	100	100	100	24.0795	0.364104	0	20.0065	0	0.183948	8.06563	0	0	0.0562047		0.15	0.19
ERR031691_ST1	100	100	100	23.8527	0.214179	0	19.9093	0	0	7.19702	0	0	0.0562047		0.15	0.19
ERR031692_ST1	100	100	100	23.7727	0.221318	0	19.8012	0	0.0919741	8.07942	0	0.17723	0		0.15	0.19
ERR031693_ST1	100	100	100	23.826	0.235596	0	19.8012	0	0	8.78257	0	0	0		0.15	0.19
ERR031694_ST1	100	100	100	23.7193	0.271293	0	19.8012	0	0	6.61795	0	0	0		0.15	0.19
ERR031695_ST1	100	100	100	22.9923	0.985222	0	19.6932	0	0	8.17593	0	0	0		0.15	0.19
ERR031696_ST1	100	0	0	23.7527	0.214179	0	19.8012	0	0.183948	0	0	0	0		0.15	0.19
ERR031697_ST1	100	100	100	23.9461	0.339116	0	19.9039	0	0	8.30001	0	0.244746	0		0.15	0.19
ERR031698_ST1	100	100	100	23.826	0.235596	0	19.8012	0	0.0919741	8.35516	0	0	0		0.15	0.19
ERR031700_ST1	100	100	100	23.706	0.235596	0	19.9093	0	0.0919741	7.14187	0.282318	0	0		0.15	0.19
ERR031701_ST1	100	100	100	23.9528	0.30342	0	19.8066	0	0.0919741	8.43789	0	0	0		0.15	0.19
ERR031702_ST1	100	100	100	23.8661	0.30342	0	20.0119	0.110914	0	8.32759	0	0	0		0.15	0.19
ERR031703_ST1	100	100	100	23.9528	0.442636	0	20.3198	0	0	8.39653	0	0.244746	0		0.15	0.19
ERR031704_ST1	100	100	100	23.7126	0.221318	0	19.8012	0	0.0919741	8.35516	0.297177	0	0		0.15	0.19
ERR031705_ST1	100	100	100	23.726	0.289141	25.4228	19.8012	0	0	7.25217	0	0	0		0.15	0.19
ERR031706_ST1	100	100	100	24.0728	0.271293	25.2998	20.0119	0.110914	0	8.13457	0	0	0.0562047		0.15	0.19
ERR031707_ST1	100	100	100	23.8127	0.30342	0	19.8012	0	0.0919741	8.17593	0	0	0.757284		0.15	0.19
ERR031708_ST1	100	100	100	23.0123	0.446205	0.146064	18.8128	0.110914	0.0919741	7.45898	0	0.244746	0		0.15	0.19
ERR031709_ST1	100	100	100	23.7393	0.235596	0	19.8931	0	0.0919741	7.83124	0	0	0		0.15	0.19
ERR031710_ST1	100	100	100	23.7994	0.346255	0	19.8066	0.110914	0	7.30732	0	0	0		0.15	0.19
ERR031711_ST1	100	0.3118	0	23.9928	0.374813	0	19.8012	0	0	0	0	0	0		0.15	0.19
ERR044802_ST1	100	100	100	23.8527	0.271293	0	19.8012	0	0	8.25865	0	0	0		0.15	0.19
ERR044803_ST1	100	100	100	23.8727	0.278432	0	19.8012	0	0	7.55549	0	0	0		0.15	0.19
ERR044804_ST1	100	100	100	24.1329	2.12394	0	19.812	6.80457	4.22112	8.61712	0	0	0		0.15	0.19
ERR044805_ST1	100	100	100	23.8661	0.271293	0	19.8012	0	0	8.46546	0	0	0		0.15	0.19
ERR044806_ST1	100	100	100	24.1262	0.271293	0	19.8066	0	0	8.50682	0	0	0		0.15	0.19
ERR044807_ST1	100	100	100	23.8727	0.274863	0	19.8066	0	0	8.58955	0	0	0		0.15	0.19
ERR044808_ST1	100	100	100	23.8594	0.235596	0.146064	19.8066	0	0	8.43789	0	0	0		0.15	0.19
ERR044809_ST1	100	100	100	23.8194	0.239166	0	19.8012	0	0	8.35516	0	0	0		0.15	0.19
ERR044812_ST1	100	100	100	24.1329	0.271293	0	19.8012	0	0	8.57576	0	0	0		0.15	0.19
ERR044813_ST1	100	100	100	23.8661	0.271293	0	19.8012	0	0	8.58955	0	0	0.706996		0.15	0.19
ERR044814_ST1	100	0.114593	0	23.8594	0.235596	0	19.8012	0	0	0	0	0	0		0.15	0.19
ERR044815_ST1	100	0	0.686235	23.8661	0.271293	0	19.8012	0	0	0	0	0	0		0.15	0.19
ERR044816_ST1	100	0.0266496	0	23.8527	0.239166	0	19.8066	0	0	0	0	0	0		0.15	0.19
ERR044817_ST1	100	0.165228	0	23.8727	0.235596	0	19.8066	0	0	0	0	0	0		0.15	0.19
ERR044818_ST1	100	0	0.067944	24.0128	0.271293	0	19.812	0	0	0	0	0	0		0.15	0.19
ERR044825_ST1	100	100	100	23.8661	0.271293	0	19.8066	0	0	8.69985	0	0	0		0.15	0.19
ERR044826_ST1	100	100	100	23.8727	0.271293	0	20.1361	0	0	8.36895	0	0	3.80417		0.15	0.19
ERR044827_ST1	100	100	100	24.1729	0.746056	0	19.8174	0	0	8.93423	0	0	0		0.15	0.19
ERR044828_ST1	100	100	100	24.1329	0.271293	0	19.8066	0	0	8.58955	0	0	0		0.15	0.19
ERR044830_ST1	100	100	100	23.8727	0.271293	0	19.8066	0	0	8.47925	0	0	0		0.15	0.19
ERR044831_ST1	100	0.175887	0.455225	24.0795	0.271293	0	19.8012	0	0	0	0	0	0		0.15	0.19
ERR044832_ST1	100	100	100	23.8661	0.274863	0	19.812	0	0	8.45168	0	0	0		0.15	0.19
ERR044834_ST1	100	100	100	23.8461	0.221318	0	19.8012	0	0	8.28623	0	0	0		0.15	0.19
ERR044835_ST1	100	100	100	24.1329	0.274863	0	19.812	0	0	8.68606	0	0	0		0.15	0.19
ERR044837_ST1	100	100	100	24.1462	0.274863	0	19.812	0	0	8.71364	0	0	0		0.15	0.19
ERR044838_ST1	100	100	100	23.7793	0.228457	0	19.8012	0	0	7.51413	0	0	0		0.15	0.19
ERR044839_ST1	100	100	100	24.1329	0.274863	0	19.8174	0	0	8.81015	0	0	0		0.15	0.19
ERR044840_ST1	100	100	100	23.8727	0.271293	0	19.8066	0	0	8.65849	0	0	0		0.15	0.19
ERR044841_ST1	100	100	100	23.8861	0.274863	0	19.8174	0	0	8.67227	0	0	0		0.15	0.19
ERR044842_ST1	100	100	100	23.8661	0.271293	0	19.8174	0	0	8.46546	0	0	0		0.15	0.19
ERR044843_ST1	100	100	100	24.1395	0.274863	0	19.8066	0	0	8.78257	0	0	0		0.15	0.19
ERR044844_ST1	100	100	100	23.8527	0.221318	0	19.8066	0	0	8.36895	0	0	0		0.15	0.19
ERR044845_ST1	100	100	100	23.8794	0.224888	0	19.8012	0	0	8.43789	0	0	0		0.15	0.19
ERR044847_ST1	100	100	100	23.8527	0.274863	0	19.8066	0	0	8.6447	0	0	0		0.15	0.19
ERR044848_ST1	100	100	100	23.8794	0.531877	0	19.8174	0	0	8.63091	0	0	0		0.15	0.19
ERR1256644_ST1	100	2.26255	0.176654	24.453	0.853145	0.292128	20.9733	0.216282	0.745474	1.06163	0.579495	0	0.112409		0.15	0.19
ERR125947_ST1	100	100	100	24.4664	0.90669	0.292128	20.9679	0.216282	0.745474	8.49304	0.579495	0.244746	0.112409		0.15	0.19
ERR125948_ST1	100	100	100	24.2529	1.02806	0.146064	20.9679	0.110914	0.745474	8.35516	0.282318	0.244746	0.112409		0.15	0.19
ERR125949_ST1	100	100	100	24.2396	0.860284	0.292128	20.9679	0.216282	0.745474	8.17593	0.579495	0.244746	0.112409		0.15	0.19
ERR125950_ST1	100	100	100	24.2396	1.13158	0.292128	20.9625	0.216282	0.745474	8.45168	0.579495	0.244746	0.112409		0.15	0.19
ERR125963_ST1	100	100	100	24.1262	1.03163	0.146064	20.9625	0.216282	0.6535	7.94154	0.579495	0.244746	0.112409		0.15	0.19
ERR125964_ST1	100	100	100	24.0928	0.856714	0.292128	20.9679	0.216282	0.745474	8.34138	0.579495	0.244746	0.112409		0.15	0.19
ERR125975_ST1	100	100	100	24.0195	1.42072	1.1147	20.9625	0.110914	0.745474	7.70716	0.282318	0.244746	0.112409		0.15	0.19
ERR125979_ST1	100	100	100	24.1929	0.90669	0.292128	20.8545	0.36047	0.745474	7.62443	0.579495	0.244746	0.112409		0.15	0.19
ERR125991_ST1	100	100	100	24.1996	0.792461	0.292128	20.8545	0.216282	0.561526	8.34138	0.282318	0.244746	0.112409		0.15	0.19
ERR1544877_ST1	100	100	100	24.4664	0.849575	0.299815	23.7118	0.216282	0.745474	7.80367	0.579495	0.244746	0.112409		0.15	0.19
ERR1544881_ST1	100	100	100	24.4597	0.856714	0.292128	23.5173	0.216282	0.755155	8.50682	0.579495	0.244746	0.112409		0.15	0.19
ERR1544882_ST1	100	100	100	24.4597	0.849575	0.292128	23.6038	0.216282	0.745474	8.0932	0.579495	0.244746	0.112409		0.15	0.19
ERR1544885_ST1	100	100	100	24.4731	0.860284	0.292128	23.5714	0.216282	0.745474	8.50682	0.579495	0.244746	0.112409		0.15	0.19
ERR1544888_ST1	100	100	100	24.4864	1.10302	0.292128	23.7334	0.221828	0.750315	9.15483	0.579495	0.244746	0.112409		0.15	0.19
ERR1853156_ST1	100	0	0	24.0995	0.274863	0	19.812	0	0	0	0	0	0		0.15	0.19
ERR248711_ST1	100	100	100	23.7126	0.214179	0	19.8012	0	0	7.10051	0	0	0		0.15	0.19
ERR248712_ST1	100	100	100	23.5125	0.214179	0	19.8012	0	0	6.90749	0	0	0		0.15	0.19
ERR248713_ST1	100	100	100	23.5192	0.214179	0	19.8012	0	0	7.19702	0	0	0		0.15	0.19
ERR248714_ST1	100	100	100	23.6993	0.217748	0	19.8066	0	0	6.39735	0	0	0		0.15	0.19
ERR248716_ST1	100	100	100	23.5326	0.235596	0	19.8012	0	0	6.57659	0	0	0		0.15	0.19
ERR248718_ST1	100	100	100	23.6926	0.214179	0	19.8012	0	0	6.86612	0	0	0		0.15	0.19
ERR248719_ST1	100	100	100	23.5259	0.217748	0	19.8012	0	0	6.46629	0	0	0		0.15	0.19
ERR248720_ST1	100	100	100	23.5392	0.271293	0	19.8012	0	0	6.90749	0	0	0		0.15	0.19
ERR248721_ST1	100	100	100	23.5526	0.214179	0	19.8012	0	0	7.004	0	0	0		0.15	0.19
ERR248722_ST1	100	100	100	23.5392	0.214179	0	19.8012	0.105368	0	6.75583	0	0	0		0.15	0.19
ERR248723_ST1	100	100	100	23.5125	0.214179	0	19.8012	0	0	5.94237	0	0	0		0.15	0.19
ERR248724_ST1	100	100	100	23.5059	0.224888	0	19.8012	0	0	7.14187	0	0	0		0.15	0.19
ERR248725_ST1	100	100	100	23.5059	0.214179	0	19.8012	0	0	6.74204	0	0	0		0.15	0.19
ERR248726_ST1	100	100	100	23.5125	0.214179	0	19.8012	0	0	6.31463	0	0	0		0.15	0.19
ERR248727_ST1	100	100	100	23.7527	0.221318	0	19.9795	0	0	5.98373	0	0	0		0.15	0.19
ERR248728_ST1	100	100	100	23.7193	0.29985	0	19.8012	0	0	6.8937	0	0	0		0.15	0.19
ERR248729_ST1	100	100	100	23.7527	0.214179	0	19.8012	0	0	6.96264	0	0	0		0.15	0.19
ERR248730_ST1	100	100	100	23.5192	0.214179	0	19.8012	0	0	6.46629	0	0	0		0.15	0.19
ERR248731_ST1	100	100	100	23.7393	0.214179	0	19.8012	0	0	6.97642	0	0	0		0.15	0.19
ERR248732_ST1	100	100	100	23.5192	0.217748	0	19.8012	0	0	6.79719	0	0	0		0.15	0.19
ERR248733_ST1	100	100	100	23.5459	0.224888	0	19.8012	0	0	6.92127	0	0	0		0.15	0.19
ERR248734_ST1	100	100	100	23.5192	0.214179	0	19.8012	0	0	6.7834	0	0	0		0.15	0.19
ERR248735_ST1	100	100	100	23.5726	0.271293	0	19.8012	0	0	6.8937	0	0	0		0.15	0.19
ERR248736_ST1	100	100	100	23.7593	0.224888	0	19.8012	0	0	6.70068	0	0	0		0.15	0.19
ERR248737_ST1	100	100	100	23.5259	0.224888	0	19.8012	0	0.0919741	6.7834	0	0	0		0.15	0.19
ERR248738_ST1	100	100	100	23.5192	0.214179	0	19.8012	0	0	6.17675	0	0	0		0.15	0.19
ERR248739_ST1	100	100	100	23.5792	0.221318	0	19.8012	0	0	6.72825	0	0	0		0.15	0.19
ERR248740_ST1	100	100	100	23.5792	0.224888	0	19.8012	0	0	6.8937	0	0	0		0.15	0.19
ERR248741_ST1	100	100	100	23.5259	0.214179	0	19.8012	0	0	6.99021	0	0	0		0.15	0.19
ERR248742_ST1	100	100	100	23.5259	0.224888	0	19.8012	0	0	6.46629	0	0	0		0.15	0.19
ERR248743_ST1	100	100	100	23.806	0.271293	0	19.8012	0	0	7.1143	0	0	0		0.15	0.19
ERR248744_ST1	100	100	100	23.7727	0.271293	0	19.8012	0	0	7.19702	0	0	0		0.15	0.19
ERR248745_ST1	100	100	100	23.7193	0.221318	0	19.8012	0	0	7.15566	0	0	0		0.15	0.19
ERR248746_ST1	100	100	100	23.5459	0.217748	0	19.8012	0	0	7.1143	0	0	0		0.15	0.19
ERR248747_ST1	100	100	100	23.5392	0.214179	0	19.8012	0	0	6.75583	0	0	0		0.15	0.19
ERR248748_ST1	100	100	100	23.5726	0.224888	0	19.8012	0	0	6.46629	0	0	0		0.15	0.19
ERR248749_ST1	100	100	100	23.5259	0.214179	0	19.8012	0	0	6.48008	0	0	0		0.15	0.19
ERR248750_ST1	100	100	100	23.5726	0.224888	0	19.8012	0	0	6.79719	0	0	0		0.15	0.19
ERR248751_ST1	100	100	100	23.7727	0.221318	0	19.8012	0	0	7.34868	0	0	0		0.15	0.19
ERR248752_ST1	100	100	100	23.5192	0.221318	0	19.8012	0	0	7.03157	0	0	0		0.15	0.19
ERR248753_ST1	100	100	100	23.5392	0.214179	0	19.8012	0	0	6.76961	0	0	0		0.15	0.19
ERR248754_ST1	100	100	100	23.5259	0.214179	0	19.8012	0	0	6.93506	0	0	0		0.15	0.19
ERR248755_ST1	100	100	100	23.7527	0.214179	0	19.8012	0	0	6.03888	0	0	0		0.15	0.19
ERR248756_ST1	100	100	100	23.6993	0.235596	0	19.8012	0	0	6.7834	0	0	0		0.15	0.19
ERR248757_ST1	100	100	100	23.5726	0.214179	0	19.8012	0	0	6.82476	0	0	0		0.15	0.19
ERR248758_ST1	100	100	100	23.5526	0.214179	0	19.8012	0	0	6.42493	0	0	0		0.15	0.19
ERR248759_ST1	100	100	100	23.5392	0.224888	0	19.8012	0	0	6.8937	0	0	0		0.15	0.19
ERR248761_ST1	100	100	100	23.5326	0.224888	0	19.8012	0	0	7.01779	0	0	0		0.15	0.19
ERR248762_ST1	100	100	100	23.826	0.224888	0	19.8012	0	0	7.32111	0	0.210988	0		0.15	0.19
ERR248763_ST1	100	100	100	23.7193	0.221318	0	19.8012	0	0	6.86612	0	0	0		0.15	0.19
ERR248764_ST1	100	100	100	24.0595	0.549725	0.146064	20.5304	0	0.285604	7.27975	0	0	0		0.15	0.19
ERR248765_ST1	100	100	100	23.9861	0.574713	0.146064	20.0065	0.110914	0.285604	6.81097	0.297177	0	0.0562047		0.15	0.19
ERR248766_ST1	100	100	100	24.0528	0.49975	0	20.3252	0	0.285604	6.43872	0.282318	0.244746	0		0.15	0.19
ERR248767_ST1	100	100	100	23.9394	0.567573	0.292128	20.633	0.105368	0.377578	7.36247	0.282318	0	0.112409		0.15	0.19
ERR248768_ST1	100	100	100	23.9528	0.581852	0.292128	20.6438	0	0.561526	6.68689	0.579495	0	0.0562047		0.15	0.19
ERR248769_ST1	100	100	99.6875	23.9394	0.49618	0	20.2117	0.216282	0.372737	6.64553	0	0	0.0562047		0.15	0.19
ERR248770_ST1	100	100	88.5175	23.8327	0.69965	0.146064	20.3252	0.216282	0.275922	7.34868	0.282318	0	0.0562047		0.15	0.19
ERR248771_ST1	100	100	100	24.0528	0.50332	0	20.4494	0	0.275922	6.75583	0	0.244746	0.0562047		0.15	0.19
ERR248772_ST1	100	100	98.6887	23.8461	0.282002	0	20.2171	0.110914	0.377578	6.81097	0	0.244746	0.112409		0.15	0.19
ERR248773_ST1	100	100	100	23.9528	0.646106	0.292128	20.5304	0.216282	0.377578	6.99021	0.282318	0	0		0.15	0.19
ERR248774_ST1	100	100	100	23.8127	0.585422	0.146064	20.525	0	0.377578	5.66662	0	0	0.0562047		0.15	0.19
ERR248775_ST1	100	100	100	23.6926	0.446205	0.146064	20.3198	0	0.183948	6.6731	0	0.219428	0.0562047		0.15	0.19
ERR248776_ST1	100	100	100	23.9261	0.435497	0	20.3414	0	0.285604	7.37626	0	0.194109	0.0562047		0.15	0.19
ERR248777_ST1	100	100	97.1328	23.8194	0.560434	0	20.3198	0.110914	0.275922	7.27975	0.579495	0.168791	0.0562047		0.15	0.19
ERR248778_ST1	100	100	100	23.6993	0.424788	0	19.9093	0	0.183948	7.05915	0	0.244746	0		0.15	0.19
ERR251715_ST1	100	100	100	23.9328	0.717498	0.146064	20.7357	0.110914	0.377578	7.56928	0	0.244746	0.0562047		0.15	0.19
ERR251719_ST1	100	100	100	24.3396	0.792461	0.292128	20.8599	0.216282	0.551844	7.73473	0	0.244746	0.112409		0.15	0.19
ERR251725_ST1	100	100	100	23.9394	0.778182	0.146064	20.336	0.110914	0.551844	7.67958	0	0.244746	0.112409		0.15	0.19
ERR251729_ST1	100	100	100	23.8394	0.567573	0.146064	20.6438	0	0.551844	7.16945	0	0.244746	0		0.15	0.19
ERR251730_ST1	100	100	100	23.826	0.788891	0	20.6222	0	0.367896	6.81097	0.282318	0.244746	0.112409		0.15	0.19
ERR251732_ST1	100	100	100	24.1129	0.838866	0.292128	20.7519	0.216282	0.469552	7.58307	0.297177	0.210988	0.0562047		0.15	0.19
ERR251740_ST1	100	100	100	24.1929	0.713929	0.146064	20.7627	0.216282	0.377578	7.18323	0.297177	0.244746	0.112409		0.15	0.19
ERR251742_ST1	100	100	100	24.0928	0.638966	0.292128	20.633	0.110914	0.561526	7.10051	0.282318	0.244746	0.0562047		0.15	0.19
ERR251744_ST1	100	100	100	24.3263	0.646106	0.146064	20.8545	0.216282	0.469552	8.38274	0	0.244746	0.0562047		0.15	0.19
ERR251747_ST1	100	100	100	24.1195	0.785322	0.292128	20.7519	0.216282	0.556685	7.88639	0.579495	0.244746	0		0.15	0.19
ERR251756_ST1	100	100	100	23.9795	0.69965	0.292128	20.8491	0.110914	0.377578	8.38274	0.297177	0.244746	0.0562047		0.15	0.19
ERR251757_ST1	100	100	100	23.7593	0.635397	0.292128	20.4494	0.216282	0.561526	7.12808	0.282318	0.244746	0.112409		0.15	0.19
ERR251758_ST1	100	100	100	24.0795	0.574713	0.146064	20.5304	0.110914	0.469552	7.29353	0.297177	0.244746	0		0.15	0.19
ERR251767_ST1	100	100	100	23.9261	0.856714	0.292128	20.336	0.105368	0.377578	7.84503	0	0.244746	0.112409		0.15	0.19
ERR251768_ST1	100	100	100	23.9728	0.681802	0.146064	20.7195	0.637755	0.561526	7.9829	0.282318	0	0.112409		0.15	0.19
ERR251770_ST1	100	100	100	23.9528	0.781752	0.292128	20.6492	0	0.377578	7.41762	0	0.244746	0.0562047		0.15	0.19
ERR251775_ST1	100	100	100	23.9728	0.50332	0.146064	20.3198	0.216282	0.367896	7.40383	0	0	0.112409		0.15	0.19
ERR251776_ST1	100	100	100	23.9461	0.724638	0.146064	20.8545	0.216282	0.469552	7.04536	0.282318	0.219428	0.0562047		0.15	0.19
ERR251785_ST1	100	100	100	23.9795	0.642536	0.146064	20.633	0.110914	0.372737	7.56928	0.297177	0.244746	0.0562047		0.15	0.19
ERR251791_ST1	100	1.31116	0	23.8461	0.713929	0.146064	20.5034	0	0.469552	0.537709	0.297177	0	0.0562047		0.15	0.19
ERR251805_ST1	100	100	100	23.706	0.214179	0	19.8012	0	0	6.83855	0	0	0		0.15	0.19
ERR251823_ST1	100	100	100	23.7593	0.306989	0	19.9039	0	0.0919741	7.18323	0	0	0		0.15	0.19
ERR251829_ST1	100	100	100	37.3799	62.633	0	19.8012	0.920586	0.98267	7.30732	0	0	0.0798698		0.15	0.19
ERR251831_ST1	100	100	100	36.6529	56.0505	0	31.2088	0.36047	0	6.64553	0	0	1.79559		0.15	0.19
ERR251834_ST1	100	100	100	37.6001	61.8476	0	19.8012	0.948314	1.02624	7.39005	0	0	0		0.15	0.19
ERR251841_ST1	100	100	100	23.7126	0.235596	0	19.8012	0	0	7.01779	0	0	0		0.15	0.19
ERR251857_ST1	100	100	100	23.6326	0.228457	0	19.8012	0	0	7.03157	0	0	0		0.15	0.19
ERR251864_ST1	100	100	100	23.6993	0.221318	0	19.8012	0	0	7.05915	0	0	0		0.15	0.19
ERR251867_ST1	100	100	100	26.3207	3.31977	0	19.8012	0	0	6.83855	0	0	0		0.15	0.19
ERR277253_ST1	100	100	100	23.7593	0.856714	0.146064	20.8599	0.105368	0.561526	4.82559	0.579495	0.18567	0.0562047		0.15	0.19
ERR277254_ST1	100	100	100	24.4597	0.849575	0.292128	20.9625	0.216282	0.745474	7.16945	0.579495	0.244746	0.112409		0.15	0.19
ERR277256_ST1	100	100	100	24.0728	0.846006	0.292128	21.1192	0.216282	0.745474	6.75583	0.282318	0.244746	0.112409		0.15	0.19
ERR277258_ST1	100	100	100	24.0595	0.788891	0.292128	20.9301	0.216282	0.643818	7.36247	0	0.244746	0.112409		0.15	0.19
ERR277259_ST1	100	100	100	24.453	0.849575	0.146064	20.9625	0.216282	0.745474	6.50765	0.579495	0.244746	0.112409		0.15	0.19
ERR277260_ST1	100	100	100	24.0728	0.849575	0.292128	20.9787	0.216282	0.643818	7.52792	0.579495	0.244746	0.112409		0.15	0.19
ERR277262_ST1	100	100	100	24.453	0.860284	0.292128	20.9625	0.216282	0.740633	6.49386	0.579495	0.244746	0.112409		0.15	0.19
ERR277264_ST1	100	100	100	24.453	0.849575	0.292128	20.9625	0.216282	0.643818	8.25865	0.579495	0.244746	0.112409		0.15	0.19
ERR277271_ST1	100	100	100	24.1996	0.90312	0	20.2171	0	0.367896	5.6942	0	0	0		0.15	0.19
ERR339502_ST1	100	100	100	24.1929	0.856714	0.292128	21.0651	0.32165	0.837448	8.35516	0.579495	0.244746	0.112409		0.15	0.19
ERR339517_ST1	100	100	100	23.806	1.04948	0.146064	20.9733	0.216282	0.561526	7.84503	0	0.244746	0.0562047		0.15	0.19
ERR339518_ST1	100	100	100	24.1062	31.3165	0.292128	21.0921	0.232919	0.6535	8.34138	0.579495	0.244746	0.112409		0.15	0.19
ERR339520_ST1	100	100	100	23.9795	1.08517	0.292128	20.9625	0.216282	0.377578	8.0932	0.297177	0.244746	0.0562047		0.15	0.19
ERR339521_ST1	100	100	100	24.1395	0.574713	0.292128	20.8653	0.110914	0.6535	7.99669	0	0.244746	0.0562047		0.15	0.19
ERR339523_ST1	100	100	100	24.0662	0.910259	0.292128	20.9625	0.216282	0.561526	7.69337	0.579495	0.244746	0.112409		0.15	0.19
ERR339525_ST1	100	100	100	24.3263	0.90669	0.292128	20.9625	0.32165	0.6535	7.88639	0.282318	0.244746	0.0562047		0.15	0.19
ERR339526_ST1	100	100	100	23.8461	2.00971	0.292128	20.9625	0.216282	0.561526	7.91397	0.579495	0.244746	0.0562047		0.15	0.19
ERR339527_ST1	100	100	100	23.8127	0.788891	0.292128	20.9625	0.110914	0.469552	7.19702	0.282318	0.244746	0.112409		0.15	0.19
ERR339528_ST1	100	100	100	23.9328	0.781752	0.292128	20.8545	0.216282	0.6535	8.12078	0.282318	0.244746	0.112409		0.15	0.19
ERR339529_ST1	100	100	100	24.3063	0.853145	0.292128	20.8599	0.216282	0.464711	7.91397	0.282318	0.244746	0.112409		0.15	0.19
ERR339530_ST1	100	100	100	23.666	0.849575	0.292128	20.8599	0.216282	0.367896	7.48656	0.282318	0.244746	0.0562047		0.15	0.19
ERR339535_ST1	100	100	100	24.1462	0.856714	0.292128	20.9625	0.216282	0.6535	7.95533	0.282318	0.244746	0.112409		0.15	0.19
ERR339538_ST1	100	100	100	24.0128	0.849575	0.292128	20.6006	0.216282	0.45987	6.65931	0.282318	0.244746	0.112409		0.15	0.19
ERR339539_ST1	100	100	100	23.2724	0.849575	0.292128	20.8599	0.216282	0.469552	7.72094	0.282318	0.244746	0.0562047		0.15	0.19
ERR339670_ST1	100	100	100	23.8727	0.49975	0	20.3144	0.110914	0.45987	7.03157	0	0.244746	0.112409		0.15	0.19
ERR339674_ST1	100	100	100	23.9728	0.706789	0	20.5412	0.216282	0.280763	7.43141	0	0.244746	0.0562047		0.15	0.19
ERR339676_ST1	100	100	100	23.9528	0.713929	0.146064	20.9625	0.110914	0.6535	8.03805	0	0.244746	0		0.15	0.19
ERR339680_ST1	100	100	100	23.8594	0.638966	0.292128	20.5466	0.110914	0.285604	7.88639	0	0.244746	0.0562047		0.15	0.19
ERR339684_ST1	100	100	100	23.9594	0.717498	0	20.7249	0	0.561526	7.10051	0.297177	0	0.0562047		0.15	0.19
ERR339688_ST1	100	100	100	24.0128	0.721068	0.292128	20.5412	0.105368	0.6535	7.59686	0.282318	0.244746	0.112409		0.15	0.19
ERR339699_ST1	100	100	100	23.6993	0.663954	0.292128	20.8545	0.110914	0.367896	7.40383	0.282318	0	0		0.15	0.19
ERR339702_ST1	100	100	100	23.9394	0.571143	0.146064	20.3468	0.216282	0.0919741	7.19702	0	0.244746	0		0.15	0.19
ERR339709_ST1	100	100	100	23.8327	0.781752	0.146064	20.9625	0.110914	0.367896	7.88639	0	0.244746	0.0562047		0.15	0.19
ERR339711_ST1	100	100	100	23.8194	0.567573	0	20.0065	0.110914	0.183948	7.23838	0	0	0		0.15	0.19
ERR339713_ST1	100	100	100	23.7527	0.838866	0.292128	20.5304	0.216282	0.285604	7.18323	0	0.219428	0		0.15	0.19
ERR339714_ST1	100	100	100	23.8461	0.778182	0.146064	20.6222	0.216282	0.285604	7.76231	0	0.244746	0.112409		0.15	0.19
ERR339715_ST1	100	100	100	23.806	0.785322	0.146064	20.6276	0.216282	0.469552	7.47277	0	0.244746	0.112409		0.15	0.19
ERR339749_ST1	100	100	100	23.9728	0.574713	0.146064	20.5466	0.110914	0.469552	7.32111	0	0.244746	0.0562047		0.15	0.19
ERR339750_ST1	100	100	100	24.2062	0.792461	0.292128	20.8545	0	0.19363	7.40383	0.579495	0.244746	0.112409		0.15	0.19
ERR339751_ST1	100	100	100	23.8327	0.860284	0.292128	20.7519	0.216282	0.45987	7.65201	0.282318	0	0.0562047		0.15	0.19
ERR339752_ST1	100	100	100	24.1862	0.781752	0.292128	20.5196	0.110914	0.377578	7.30732	0.282318	0.244746	0.0562047		0.15	0.19
ERR339753_ST1	100	100	100	24.1395	0.870993	0.146064	20.8545	0.110914	0.566367	8.16214	0.297177	0.244746	0		0.15	0.19
ERR339754_ST1	100	100	100	23.8461	0.781752	0.146064	20.3576	0.105368	0.6535	7.36247	0.297177	0.244746	0.112409		0.15	0.19
ERR339755_ST1	100	100	100	24.0928	0.735347	0.292128	20.9625	0.110914	0.551844	7.65201	0.579495	0.244746	0.112409		0.15	0.19
ERR339756_ST1	100	100	100	24.2062	0.731777	0.146064	20.7087	0.216282	0.285604	7.2246	0	0.244746	0.0562047		0.15	0.19
ERR339757_ST1	100	100	100	23.8394	0.531877	0.146064	20.6006	0.210736	0.285604	6.71446	0	0.244746	0.0562047		0.15	0.19
ERR339758_ST1	100	100	100	23.9461	0.706789	0	20.5574	0.105368	0.469552	7.27975	0.297177	0.17723	0.0562047		0.15	0.19
ERR339759_ST1	100	100	100	23.9661	0.653245	0	20.7519	0	0.561526	7.95533	0.282318	0.244746	0.112409		0.15	0.19
ERR339760_ST1	100	100	100	23.9461	0.717498	0.146064	20.8815	0.105368	0.745474	6.99021	0	0.244746	0.112409		0.15	0.19
ERR339762_ST1	100	100	100	24.1062	0.717498	0.292128	20.8599	0.216282	0.561526	6.92127	0.297177	0.244746	0.112409		0.15	0.19
ERR339763_ST1	100	100	100	24.1996	0.870993	0.292128	21.1029	0.110914	0.6535	8.4241	0.297177	0.244746	0.112409		0.15	0.19
ERR339764_ST1	100	100	100	24.2196	0.778182	0.292128	20.8869	0.110914	0.6535	8.34138	0.579495	0.244746	0.112409		0.15	0.19
ERR339765_ST1	100	100	100	24.2062	0.781752	0.292128	20.9625	0.216282	0.6535	8.38274	0.282318	0.244746	0.112409		0.15	0.19
ERR339767_ST1	100	100	100	24.1796	0.781752	0.292128	20.9571	0.216282	0.469552	8.0932	0.579495	0.244746	0.112409		0.15	0.19
ERR339768_ST1	100	100	100	23.8661	0.80317	0.292128	20.9625	0.216282	0.561526	7.51413	0.579495	0.244746	0.112409		0.15	0.19
ERR339769_ST1	100	100	100	24.4931	16.656	0.146064	21.0543	0.460293	0.561526	7.84503	0.579495	0.244746	0.112409		0.15	0.19
ERR339770_ST1	100	100	100	24.2129	0.853145	0.146064	20.9625	0.216282	0.643818	8.14835	0.579495	0.244746	0.112409		0.15	0.19
ERR339772_ST1	100	100	100	23.8461	0.792461	0.146064	20.9625	0.110914	0.561526	7.84503	0.282318	0.244746	0.0562047		0.15	0.19
ERR339773_ST1	100	100	100	24.2996	0.781752	0.292128	20.9625	0.216282	0.6535	7.85882	0.282318	0.244746	0.112409		0.15	0.19
ERR339774_ST1	100	100	100	24.0662	0.849575	0.292128	20.8545	0.110914	0.45987	7.92775	0	0.244746	0.112409		0.15	0.19
ERR339776_ST1	100	100	100	24.0595	0.853145	0.292128	20.8599	0.216282	0.6535	7.83124	0.297177	0.244746	0.112409		0.15	0.19
ERR339777_ST1	100	100	100	24.2396	0.849575	0.292128	20.9625	0.216282	0.561526	8.35516	0.282318	0.244746	0.112409		0.15	0.19
ERR339779_ST1	100	100	100	23.9528	0.860284	0.292128	20.8599	0.216282	0.6535	7.08672	0.297177	0.244746	0.112409		0.15	0.19
ERR339780_ST1	100	100	100	23.9594	0.710359	0.292128	20.9625	0.216282	0.561526	7.74852	0.579495	0.244746	0.112409		0.15	0.19
ERR339781_ST1	100	100	100	23.8661	0.792461	0.292128	20.8599	0.110914	0.6535	7.01779	0.282318	0.244746	0.0562047		0.15	0.19
ERR339782_ST1	100	100	100	24.0595	0.710359	0.292128	20.8599	0.105368	0.6535	6.86612	0.282318	0.244746	0.0562047		0.15	0.19
ERR339783_ST1	100	100	100	23.9528	0.849575	0.292128	20.9625	0.216282	0.469552	7.99669	0	0.244746	0.112409		0.15	0.19
ERR339784_ST1	100	100	100	24.1862	0.710359	0.292128	20.8545	0.105368	0.6535	7.77609	0.579495	0.244746	0.0562047		0.15	0.19
ERR339786_ST1	100	100	100	24.0728	1.02092	0.292128	20.9625	0.216282	0.6535	8.13457	0.579495	0.244746	0.112409		0.15	0.19
ERR339787_ST1	100	100	100	24.0795	0.713929	0.292128	20.8599	0.216282	0.6535	7.77609	0.579495	0.244746	0.112409		0.15	0.19
ERR339790_ST1	100	100	100	24.393	0.781752	0.292128	20.9625	0.216282	0.634137	8.39653	0.297177	0.244746	0.112409		0.15	0.19
ERR339791_ST1	100	100	100	23.9461	0.849575	0.445879	20.9625	0.310559	0.6535	8.23108	0.579495	0.244746	0.112409		0.15	0.19
ERR339792_ST1	100	100	100	24.1929	0.874563	0.292128	20.9625	0.216282	0.6535	8.46546	0.579495	0.244746	0.112409		0.15	0.19
ERR339793_ST1	100	100	100	24.2729	0.849575	0.292128	20.9625	0.110914	0.561526	7.8726	0.579495	0.244746	0.112409		0.15	0.19
ERR339794_ST1	100	100	100	24.0662	0.849575	0.292128	20.8599	0.110914	0.6535	8.01048	0.579495	0.388218	0.0562047		0.15	0.19
ERR339795_ST1	100	100	100	24.1862	0.781752	0.146064	20.7519	0.216282	0.6535	7.14187	0.297177	0.244746	0.0562047		0.15	0.19
ERR339797_ST1	100	100	100	24.3263	0.785322	0.292128	20.9193	0.216282	0.6535	8.32759	0.282318	0.244746	0.112409		0.15	0.19
ERR339798_ST1	100	100	100	23.9795	0.849575	0.292128	20.9625	0.216282	0.469552	7.55549	0.282318	0.244746	0.0562047		0.15	0.19
ERR339800_ST1	100	100	100	23.7994	3.00564	0.292128	21.265	0.216282	0.745474	7.73473	0.579495	0.244746	0.0562047		0.15	0.19
ERR339826_ST1	100	100	100	24.2129	0.849575	0.292128	20.9733	0.216282	0.6535	7.73473	0.579495	0.244746	0.112409		0.15	0.19
ERR339827_ST1	100	100	100	24.0928	3.12344	0.292128	20.8599	0.216282	0.6535	7.40383	0.579495	0.244746	0.0562047		0.15	0.19
ERR339828_ST1	100	100	100	23.9861	0.856714	0.146064	20.8599	0.110914	0.6535	7.69337	0.282318	0.244746	0.0562047		0.15	0.19
ERR339829_ST1	100	100	100	24.1129	0.849575	0.292128	20.8599	0.216282	0.745474	7.90018	0.579495	0.244746	0.112409		0.15	0.19
ERR339830_ST1	100	1.53768	0.387281	25.1601	54.9261	0.292128	20.9625	0.571207	0.6535	1.06163	0.297177	0	0.0562047		0.15	0.19
ERR339831_ST1	100	100	100	24.0928	0.713929	0.292128	20.9625	0.216282	0.745474	8.35516	0.579495	0.244746	0.0562047		0.15	0.19
ERR339832_ST1	100	100	100	24.4597	0.781752	0.292128	20.7519	0.216282	0.658341	7.91397	0.297177	0.244746	0.112409		0.15	0.19
ERR339833_ST1	100	100	100	23.9394	0.724638	0.146064	20.8599	0.216282	0.285604	7.54171	0	0.244746	0.112409		0.15	0.19
ERR339834_ST1	100	100	100	23.9394	0.778182	0.146064	20.8545	0.110914	0.6535	7.23838	0.282318	0.244746	0.112409		0.15	0.19
ERR339835_ST1	100	100	100	23.9328	0.781752	0.146064	20.9625	0.110914	0.561526	7.56928	0.282318	0	0.0562047		0.15	0.19
ERR339836_ST1	100	100	100	23.9594	0.767473	0.146064	20.3198	0.216282	0.561526	7.65201	0	0.244746	0.0562047		0.15	0.19
ERR339837_ST1	100	100	100	23.6993	0.638966	0.292128	20.5412	0	0.275922	7.37626	0	0	0		0.15	0.19
ERR339838_ST1	100	100	100	23.9728	0.706789	0.292128	20.9625	0.110914	0.551844	7.10051	0	0.244746	0.0562047		0.15	0.19
ERR339839_ST1	100	100	100	24.1596	0.778182	0.146064	20.7573	0.216282	0.561526	7.45898	0.579495	0.244746	0.0562047		0.15	0.19
ERR339840_ST1	100	100	100	24.1862	0.870993	0.292128	20.7519	0.216282	0.561526	8.2035	0.297177	0.244746	0.0562047		0.15	0.19
ERR339841_ST1	100	100	100	24.2062	0.792461	0.292128	20.9571	0.216282	0.367896	8.38274	0.282318	0.270065	0.0562047		0.15	0.19
ERR339842_ST1	100	100	100	24.1996	0.567573	0.292128	20.9625	0.110914	0.643818	7.48656	0	0.244746	0.0562047		0.15	0.19
ERR339843_ST1	100	100	100	23.9461	0.781752	0.146064	20.8545	0.216282	0.367896	7.66579	0	0.244746	0.0562047		0.15	0.19
ERR339844_ST1	100	100	100	24.0595	0.646106	0.292128	20.6492	0.216282	0.469552	8.06563	0.297177	0.244746	0		0.15	0.19
ERR339845_ST1	100	100	100	24.1129	0.792461	0.292128	20.8545	0	0.6535	7.19702	0.282318	0.244746	0.0443721		0.15	0.19
ERR339846_ST1	100	100	100	24.1862	0.642536	0.146064	20.3414	0.216282	0.275922	7.3349	0	0.244746	0.0562047		0.15	0.19
ERR339847_ST1	100	100	100	24.1129	0.706789	0.146064	20.6222	0.110914	0.275922	7.51413	0	0.202549	0.112409		0.15	0.19
ERR339848_ST1	100	100	100	24.1996	0.578282	0.292128	20.0065	0.216282	0.183948	7.74852	0.282318	0.244746	0.112409		0.15	0.19
ERR339849_ST1	100	100	100	23.9728	0.646106	0	20.4386	0.110914	0.469552	7.004	0.297177	0.244746	0.112409		0.15	0.19
ERR339850_ST1	100	100	100	24.1596	0.774613	0.146064	20.9625	0.216282	0.745474	7.37626	0.282318	0.210988	0.112409		0.15	0.19
ERR339851_ST1	100	100	100	23.826	0.735347	0.146064	20.7573	0.110914	0.183948	7.63822	0	0.244746	0.112409		0.15	0.19
ERR339852_ST1	100	100	100	23.9461	0.781752	0.146064	20.9571	0.105368	0.469552	7.85882	0.579495	0.244746	0.112409		0.15	0.19
ERR339853_ST1	100	100	100	23.9394	0.785322	0.146064	20.8599	0.216282	0.377578	6.96264	0.282318	0.236307	0.0562047		0.15	0.19
ERR339854_ST1	100	100	100	23.7193	0.774613	0.146064	20.7519	0.105368	0.367896	7.3349	0.579495	0.244746	0.0562047		0.15	0.19
ERR339855_ST1	100	100	100	23.8327	0.667523	0.146064	20.7519	0.216282	0.469552	7.07294	0.297177	0.244746	0.112409		0.15	0.19
ERR339856_ST1	100	100	100	24.0995	0.489041	0	20.4332	0.110914	0.367896	6.92127	0.282318	0	0.0562047		0.15	0.19
ERR339857_ST1	100	100	100	24.0795	0.70322	0.292128	20.6492	0.110914	0.377578	8.10699	0.297177	0.168791	0.112409		0.15	0.19
ERR339858_ST1	100	100	100	23.9594	0.706789	0.292128	20.9625	0.216282	0.6535	7.47277	0.579495	0.244746	0.0562047		0.15	0.19
ERR339859_ST1	100	100	100	24.2062	0.849575	0.292128	20.9625	0.216282	0.561526	8.36895	0.282318	0.244746	0.112409		0.15	0.19
ERR339860_ST1	100	100	100	24.2062	0.853145	0	20.9625	0.110914	0.551844	8.38274	0.297177	0.244746	0.112409		0.15	0.19
ERR339861_ST1	100	100	100	23.9728	0.713929	0.292128	20.7519	0.216282	0.275922	8.06563	0.282318	0.244746	0.112409		0.15	0.19
ERR339862_ST1	100	100	100	23.8394	0.870993	0.146064	20.525	0	0.469552	8.03805	0	0.244746	0.112409		0.15	0.19
ERR339863_ST1	100	100	100	23.8527	0.710359	0.146064	20.7519	0.216282	0.561526	8.01048	0	0.244746	0.0562047		0.15	0.19
ERR339864_ST1	100	100	100	24.2129	0.90669	7.27245	22.5667	0.216282	0.6535	7.88639	0.297177	6.95417	0.2544		0.15	0.19
ERR339865_ST1	100	1.3538	0	23.7193	0.567573	0	20.4278	0.110914	0.285604	0.785882	0	0	0.112409		0.15	0.19
ERR339866_ST1	100	100	100	23.9328	0.713929	0.146064	20.7141	0.216282	0.469552	7.32111	0.282318	0	0.0562047		0.15	0.19
ERR339867_ST1	100	100	100	23.9394	0.70322	0.146064	20.9625	0.216282	0.367896	7.21081	0.297177	0.244746	0.0562047		0.15	0.19
ERR339868_ST1	100	100	100	24.3196	0.849575	0.146064	20.9571	0.110914	0.469552	7.62443	0.579495	0.244746	0.112409		0.15	0.19
ERR339869_ST1	100	100	100	24.0662	0.653245	0.292128	20.7519	0.216282	0.285604	8.16214	0	0.244746	0.112409		0.15	0.19
ERR339870_ST1	100	100	100	24.293	0.80317	0.292128	20.9625	0.110914	0.561526	8.39653	0.579495	0.244746	0.112409		0.15	0.19
ERR339871_ST1	100	100	100	23.9861	0.792461	0.146064	20.7465	0.216282	0.561526	7.43141	0	0.244746	0.112409		0.15	0.19
ERR339872_ST1	100	100	100	24.0862	0.70322	0.146064	20.7519	0.110914	0.551844	7.65201	0.282318	0.244746	0.0562047		0.15	0.19
ERR339873_ST1	100	100	100	23.806	0.646106	0	20.2765	0.216282	0.0919741	7.08672	0	0	0.0562047		0.15	0.19
ERR339874_ST1	100	100	100	24.1129	0.778182	0.146064	20.8599	0.110914	0.561526	7.61064	0	0.244746	0.0562047		0.15	0.19
ERR339875_ST1	100	100	100	24.3597	0.564004	0.292128	20.7465	0.216282	0.6535	8.03805	0.579495	0.244746	0.112409		0.15	0.19
ERR339876_ST1	100	100	100	23.706	0.292711	0	19.8012	0	0	6.90749	0	0	0		0.15	0.19
ERR339877_ST1	100	100	100	23.9394	0.713929	0.146064	20.7519	0.216282	0.275922	7.96912	0.297177	0.244746	0.112409		0.15	0.19
ERR339878_ST1	100	100	100	24.0862	0.631827	0.146064	20.5466	0.216282	0.551844	7.9829	0.282318	0.236307	0		0.15	0.19
ERR339879_ST1	100	100	100	24.2196	0.788891	0.292128	20.9625	0.216282	0.658341	8.06563	0	0.244746	0.0562047		0.15	0.19
ERR339880_ST1	100	100	100	24.2062	0.781752	0.146064	20.9625	0	0.275922	7.63822	0	0.244746	0.0562047		0.15	0.19
ERR339881_ST1	100	100	100	23.9528	0.710359	0.146064	20.3198	0.110914	0.183948	7.61064	0	0.160351	0.0562047		0.15	0.19
ERR339882_ST1	100	100	100	24.1996	0.713929	0.146064	20.7519	0	0.547004	7.4452	0	0.244746	0.0562047		0.15	0.19
ERR339883_ST1	100	100	100	24.1996	0.646106	0	20.444	0.110914	0.275922	6.61795	0	0	0.0562047		0.15	0.19
ERR339884_ST1	100	100	100	23.9795	0.635397	0.146064	20.6654	0.110914	0.285604	7.43141	0	0	0		0.15	0.19
ERR339885_ST1	100	100	100	23.9728	0.642536	0.146064	20.6438	0.105368	0.275922	7.50034	0	0	0		0.15	0.19
ERR339886_ST1	100	100	100	23.9528	0.713929	0.292128	20.8545	0.110914	0.561526	7.54171	0.297177	0.244746	0.112409		0.15	0.19
ERR339887_ST1	100	100	100	23.8394	0.713929	0.146064	20.5466	0.110914	0.183948	6.50765	0	0.244746	0		0.15	0.19
ERR339888_ST1	100	100	100	23.7126	0.638966	0	20.8599	0.216282	0.551844	7.77609	0	0.244746	0.112409		0.15	0.19
ERR339889_ST1	100	100	100	23.9728	0.574713	0	20.2009	0.216282	0.275922	6.87991	0.297177	0.244746	0.0562047		0.15	0.19
ERR339890_ST1	100	100	100	23.8461	0.349825	0.292128	20.8599	0.216282	0.469552	7.23838	0.282318	0.244746	0.0562047		0.15	0.19
ERR339891_ST1	100	100	100	24.0662	0.731777	0.146064	20.3198	0.110914	0.183948	7.39005	0	0	0		0.15	0.19
ERR339892_ST1	100	100	100	23.6926	0.635397	0.146064	20.3144	0.110914	0.275922	7.47277	0.297177	0.244746	0.0562047		0.15	0.19
ERR339893_ST1	100	100	100	24.0995	0.646106	0.292128	20.8545	0.105368	0.469552	7.92775	0.282318	0.244746	0		0.15	0.19
ERR339894_ST1	100	100	100	24.0795	0.860284	0.292128	20.8653	0.32165	0.551844	7.73473	0.297177	0.244746	0		0.15	0.19
ERR339895_ST1	100	100	100	24.2129	0.838866	0.146064	20.525	0	0.561526	7.91397	0.282318	0.244746	0.112409		0.15	0.19
ERR339896_ST1	100	100	100	23.9394	0.849575	0.292128	20.8815	0.210736	0.551844	8.35516	0.297177	0.244746	0.0562047		0.15	0.19
ERR339897_ST1	100	100	100	24.0795	0.724638	0.292128	20.5412	0.105368	0.367896	7.15566	0	0.244746	0.112409		0.15	0.19
ERR339898_ST1	100	100	100	24.2463	0.90669	0.292128	20.9625	0.216282	0.469552	7.96912	0.297177	0.244746	0.112409		0.15	0.19
ERR339899_ST1	100	1.04466	0	23.9461	0.517598	0.146064	20.6384	0.105368	0.6535	0.537709	0.282318	0	0.0562047		0.15	0.19
ERR339900_ST1	100	100	100	24.1129	0.717498	0.292128	20.9517	0.216282	0.377578	7.77609	0	0	0.112409		0.15	0.19
ERR339901_ST1	100	100	100	24.2396	0.781752	0.146064	20.6114	0.216282	0.6535	8.06563	0.579495	0.244746	0.112409		0.15	0.19
ERR339902_ST1	100	100	100	23.8394	0.724638	0.292128	20.7573	0.110914	0.551844	7.62443	0	0.244746	0.112409		0.15	0.19
ERR339903_ST1	100	100	100	24.1929	0.788891	0.146064	20.525	0.110914	0.469552	7.15566	0	0.244746	0.112409		0.15	0.19
ERR339904_ST1	100	100	100	24.5264	2.27029	0.146064	20.7357	0.216282	1.05044	8.03805	0.579495	0.244746	0.0562047		0.15	0.19
ERR339905_ST1	100	100	100	24.1062	0.713929	0.292128	20.7573	0.216282	0.6535	7.99669	0.579495	0.244746	0.0562047		0.15	0.19
ERR339906_ST1	100	100	100	24.1996	0.717498	0.292128	20.9625	0.105368	0.745474	7.51413	0	0	0.112409		0.15	0.19
ERR339907_ST1	100	100	100	24.1129	0.849575	0.146064	20.8599	0.110914	0.469552	7.72094	0.282318	0.244746	0.112409		0.15	0.19
ERR339908_ST1	100	100	100	24.1996	0.849575	0.292128	20.7519	0.110914	0.643818	8.17593	0.579495	0.244746	0		0.15	0.19
ERR339909_ST1	100	100	100	24.1996	0.788891	0	20.8545	0.110914	0.745474	7.92775	0.579495	0.244746	0.0562047		0.15	0.19
ERR339910_ST1	100	100	100	23.7593	0.80317	0.292128	20.5952	0.105368	0.377578	7.76231	0	0.244746	0.0562047		0.15	0.19
ERR339911_ST1	100	100	100	23.9795	0.571143	0.146064	20.5304	0	0.275922	6.93506	0	0.244746	0.0562047		0.15	0.19
ERR339912_ST1	100	100	100	24.1462	0.713929	0.146064	20.7627	0.216282	0.6535	8.21729	0	0.244746	0.112409		0.15	0.19
ERR339913_ST1	100	100	100	23.8527	0.356964	0.146064	20.7627	0	0.285604	7.27975	0	0	0.0562047		0.15	0.19
ERR339914_ST1	100	100	100	24.2329	0.778182	0	20.8545	0.110914	0.469552	7.58307	0.297177	0.244746	0.112409		0.15	0.19
ERR339915_ST1	100	100	100	24.2062	0.781752	0.146064	20.6492	0.105368	0.285604	7.91397	0.297177	0.244746	0.112409		0.15	0.19
ERR339916_ST1	100	100	100	24.2062	0.724638	0.292128	20.7519	0.110914	0.469552	8.05184	0.579495	0.244746	0.112409		0.15	0.19
ERR339917_ST1	100	100	100	23.9328	0.567573	0.146064	20.7573	0	0.377578	7.12808	0	0.244746	0.0562047		0.15	0.19
ERR339918_ST1	100	100	100	24.0928	0.713929	0.146064	20.8545	0.216282	0.377578	8.18971	0.282318	0.244746	0.0562047		0.15	0.19
ERR339919_ST1	100	100	100	23.8461	0.781752	0	20.4062	0.110914	0.469552	6.97642	0	0	0.112409		0.15	0.19
ERR339920_ST1	100	100	100	24.0728	0.888841	0.146064	20.9625	0.105368	0.285604	7.55549	0	0.135032	0.0562047		0.15	0.19
ERR339921_ST1	100	100	100	23.8527	0.735347	0.292128	20.4386	0	0.367896	7.004	0.282318	0	0.112409		0.15	0.19
ERR339922_ST1	100	100	100	24.1862	0.581852	0.146064	20.2333	0.110914	0.367896	7.55549	0	0.244746	0.0562047		0.15	0.19
ERR339923_ST1	100	100	100	23.706	0.489041	0.292128	20.1145	0.105368	0.372737	6.70068	0.297177	0	0		0.15	0.19
ERR339924_ST1	100	100	100	23.8461	0.578282	0.292128	20.6492	0.216282	0.275922	7.34868	0	0.160351	0.0562047		0.15	0.19
ERR339925_ST1	100	100	100	23.9661	0.713929	0	20.8599	0.110914	0.285604	7.43141	0.282318	0.244746	0.0562047		0.15	0.19
ERR339926_ST1	100	100	100	24.1862	0.656814	0.146064	20.525	0.216282	0.285604	7.32111	0.282318	0.244746	0.0562047		0.15	0.19
ERR339927_ST1	100	100	100	24.1195	0.735347	0.292128	20.8275	0.216282	0.377578	7.4452	0.282318	0.244746	0.112409		0.15	0.19
ERR339928_ST1	100	100	100	24.1929	0.713929	0.146064	20.8599	0.110914	0.561526	7.92775	0.579495	0.244746	0.0562047		0.15	0.19
ERR339929_ST1	100	100	100	23.9661	0.860284	0.146064	20.8599	0.110914	0.469552	7.77609	0.297177	0	0.112409		0.15	0.19
ERR339930_ST1	100	100	100	24.0595	0.571143	0	20.6168	0	0.45987	6.59038	0	0.202549	0.112409		0.15	0.19
ERR339931_ST1	100	100	100	23.7994	0.606839	0.146064	20.4224	0	0.377578	7.01779	0	0	0		0.15	0.19
ERR339932_ST1	100	100	100	23.9861	1.56707	0	20.525	0.105368	0.367896	6.97642	0	0.244746	0.0562047		0.15	0.19
ERR339933_ST1	100	100	100	24.0261	54.5477	0.146064	20.3576	1.22005	0.275922	6.71446	0	0.244746	0.0562047		0.15	0.19
ERR339934_ST1	100	100	100	23.9928	0.649675	0.146064	20.6438	0.216282	0.275922	7.72094	0.297177	0.244746	0.0562047		0.15	0.19
ERR339935_ST1	100	100	100	23.6993	0.721068	0.146064	20.525	0.216282	0.561526	7.16945	0.297177	0.236307	0.0562047		0.15	0.19
ERR339936_ST1	100	100	100	24.1262	0.721068	0.146064	20.6979	0.105368	0.19363	7.66579	0	0.244746	0.0562047		0.15	0.19
ERR339937_ST1	100	100	100	24.3997	0.849575	0.292128	20.8545	0.216282	0.367896	7.81745	0.282318	0.261625	0.112409		0.15	0.19
ERR339938_ST1	100	100	100	24.0728	0.785322	0.292128	20.9625	0.216282	0.469552	7.45898	0.579495	0.244746	0.112409		0.15	0.19
ERR339939_ST1	100	100	100	24.2196	0.792461	0.146064	20.417	0.216282	0.551844	7.21081	0.297177	0.202549	0.0562047		0.15	0.19
ERR339941_ST1	100	100	100	24.1329	0.713929	0	20.4224	0.216282	0.561526	7.62443	0	0.244746	0.0562047		0.15	0.19
ERR339942_ST1	100	100	100	23.9194	0.771043	0.146064	20.5034	0.216282	0.561526	6.64553	0.282318	0.244746	0.112409		0.15	0.19
ERR339943_ST1	100	100	100	24.0728	0.849575	0.146064	20.8545	0.216282	0.377578	7.63822	0	0.244746	0.112409		0.15	0.19
ERR339944_ST1	100	100	100	23.9461	0.713929	0.146064	20.7519	0.110914	0.561526	7.96912	0	0.244746	0.0562047		0.15	0.19
ERR339945_ST1	100	100	100	24.1929	0.781752	0.146064	20.8599	0.110914	0.643818	7.3349	0	0.244746	0.112409		0.15	0.19
ERR339946_ST1	100	100	100	23.8661	0.713929	0.146064	20.8599	0.216282	0.19363	6.8937	0.282318	0.244746	0.0562047		0.15	0.19
ERR339947_ST1	100	100	100	23.9861	0.713929	0.292128	20.8545	0.216282	0.556685	7.8726	0	0.244746	0.0562047		0.15	0.19
ERR339948_ST1	100	100	100	24.1862	0.785322	0	20.9625	0.110914	0.367896	7.59686	0	0.244746	0.0562047		0.15	0.19
ERR339949_ST1	100	100	100	23.9528	0.842436	0.292128	20.8545	0.110914	0.561526	7.65201	0.579495	0.244746	0.112409		0.15	0.19
ERR339950_ST1	100	100	100	24.1996	0.838866	0	20.9625	0.110914	0.6535	8.4241	0.549777	0.244746	0.0562047		0.15	0.19
ERR339951_ST1	100	100	100	24.1796	0.792461	0.146064	20.4278	0	0.183948	7.4452	0.282318	0	0.0562047		0.15	0.19
ERR339952_ST1	100	100	100	24.0862	0.781752	0.146064	20.9625	0.216282	0.561526	7.34868	0.297177	0.244746	0.112409		0.15	0.19
ERR339953_ST1	100	100	100	23.9728	0.574713	0.146064	20.7519	0.216282	0.285604	7.47277	0.297177	0.168791	0.0562047		0.15	0.19
ERR339954_ST1	100	100	100	23.7126	0.656814	0.146064	20.5844	0.216282	0.551844	6.90749	0	0	0.0562047		0.15	0.19
ERR339955_ST1	100	100	100	23.9328	0.792461	0.146064	20.6492	0.216282	0.285604	7.30732	0	0.236307	0.0562047		0.15	0.19
ERR339956_ST1	100	100	100	32.0504	0.567573	0.292128	20.4008	0.216282	0.513118	9.49952	0	0.565449	0		0.15	0.19
ERR339957_ST1	100	100	100	24.0862	0.785322	0.146064	20.9571	0.110914	0.745474	7.3349	0.282318	0.244746	0.112409		0.15	0.19
ERR340071_ST1	100	100	100	23.0923	37.7668	0	19.6608	0.404836	0.145222	6.99021	0	0	0		0.15	0.19
ERR340076_ST1	100	100	100	23.0656	0.271293	0	19.4934	0	0	7.01779	0	0	0		0.15	0.19
ERR340077_ST1	100	100	100	21.7383	0.214179	0	19.0396	0	0	7.45898	0	0	0		0.15	0.19
ERR340078_ST1	100	100	100	22.452	0.221318	0	18.721	0	0	7.34868	0	0	0		0.15	0.19
ERR340113_ST1	100	100	100	23.5459	0.224888	0	19.8012	0	0	7.34868	0	0	0		0.15	0.19
ERR340127_ST1	100	100	100	23.8194	0.271293	0	19.8012	0	0.0919741	7.05915	0	0	0		0.15	0.19
ERR340131_ST1	100	100	100	23.826	0.271293	0	19.8012	0	0	7.43141	0	0	0		0.15	0.19
ERR340147_ST1	100	100	100	23.6926	0.217748	0	19.8012	0	0	6.13539	0	0	0		0.15	0.19
ERR340181_ST1	100	100	100	23.7193	0.221318	0	19.8012	0	0	7.15566	0	0	0		0.15	0.19
ERR340288_ST1	100	100	100	23.7593	0.214179	0.146064	19.8012	0	0	6.74204	0	0	0		0.15	0.19
ERR340290_ST1	100	100	100	23.5259	0.224888	0	19.8012	0	0	6.82476	0	0	0		0.15	0.19
ERR340302_ST1	100	100	100	23.7126	0.235596	0	19.8012	0	0	6.81097	0	0	0		0.15	0.19
ERR340303_ST1	100	100	100	23.766	0.285571	0	19.8012	0	0	6.97642	0	0	0		0.15	0.19
ERR340304_ST1	100	100	100	23.8461	0.235596	0	19.8012	0	0	6.64553	0	0	0		0.15	0.19
ERR340305_ST1	100	100	100	23.7193	0.5997	0	19.8012	0	0	7.30732	0	0	0		0.15	0.19
ERR347491_ST1	100	100	100	23.5125	0.271293	0	19.8012	0	0	6.57659	0	0	0		0.15	0.19
ERR347508_ST1	100	100	100	23.826	8.43864	0	19.812	0	0	6.92127	0	0	0		0.15	0.19
ERR347535_ST1	100	0	0	23.6259	4.68337	0	19.8012	0	0	0	0	0	0		0.15	0.19
ERR347577_ST1	100	100	100	23.806	0.214179	0	19.8012	0	0	6.75583	0	0	0		0.15	0.19
ERR347578_ST1	100	100	100	23.6326	0.278432	0	19.8012	0	0	6.79719	0	0	0		0.15	0.19
ERR347579_ST1	100	100	100	23.5125	0.235596	0	19.8012	0	0	6.72825	0	0	0		0.15	0.19
ERR347580_ST1	100	100	100	23.7193	0.271293	0	19.8012	0	0	6.8937	0	0	0		0.15	0.19
ERR347581_ST1	100	100	100	23.5459	0.224888	0	19.8012	0	0	6.59038	0	0.751118	0		0.15	0.19
ERR347583_ST1	100	100	100	23.8194	0.414079	0	19.8012	0	0	6.83855	0	0	0		0.15	0.19
ERR347584_ST1	100	100	100	23.5259	0.221318	0	19.8012	0	0	7.03157	0	0	0		0.15	0.19
ERR347586_ST1	100	100	100	23.5326	0.224888	0	19.8066	0	0	6.86612	0	0.751118	0		0.15	0.19
ERR347588_ST1	100	100	100	23.6926	0.271293	0	19.8012	0	0	6.8937	0	0	0		0.15	0.19
ERR347589_ST1	100	100	100	23.7126	0.235596	0	19.8012	0	0	7.15566	0	0	0		0.15	0.19
ERR347590_ST1	100	100	100	23.8527	0.235596	0	19.8012	0	0	7.25217	0	0	0		0.15	0.19
ERR347591_ST1	100	100	100	23.8527	0.235596	0	19.8066	0	0	6.81097	0	0	0		0.15	0.19
ERR347594_ST1	100	100	100	23.5326	0.235596	0	19.8012	0	0	6.70068	0	0	0		0.15	0.19
ERR347596_ST1	100	100	100	23.5125	0.214179	0	19.8066	0	0	6.81097	0	0.759558	0		0.15	0.19
ERR347599_ST1	100	100	100	23.7593	0.274863	0	19.8012	0	0	7.19702	0	0	0		0.15	0.19
ERR347601_ST1	100	100	100	23.7593	0.221318	0	19.8066	0	0	7.07294	0	0	0		0.15	0.19
ERR347602_ST1	100	100	100	23.5592	0.271293	0	19.8012	0	0	6.94885	0	0.751118	0		0.15	0.19
ERR347603_ST1	100	100	100	23.766	0.224888	0	19.8012	0	0	7.21081	0	0	0		0.15	0.19
ERR347604_ST1	100	100	100	23.5192	0.30342	0	19.8012	0	0.183948	6.79719	0	0.244746	0		0.15	0.19
ERR347605_ST1	100	100	100	23.7193	0.271293	0	19.8012	0	0	7.27975	0	0	0		0.15	0.19
ERR347606_ST1	100	100	100	23.5526	0.217748	0	19.8012	0	0	6.53523	0	0	0		0.15	0.19
ERR347610_ST1	100	100	100	23.7126	1.14943	0	19.9255	0.166371	0	6.94885	0	0	0		0.15	0.19
ERR347612_ST1	100	100	100	23.6326	0.271293	0	19.8012	0	0	6.87991	0	0	0		0.15	0.19
ERR347616_ST1	100	100	100	23.7327	0.221318	0	19.8012	0	0	6.35599	0	0	0		0.15	0.19
ERR347617_ST1	100	100	100	23.5259	0.235596	0	19.8012	0	0	6.87991	0	0	0		0.15	0.19
ERR347621_ST1	100	100	100	23.686	0.214179	0	19.8012	0	0	6.06646	0	0	0		0.15	0.19
ERR347622_ST1	100	100	100	23.7393	0.214179	0	19.8012	0	0	6.83855	0	0	0		0.15	0.19
ERR347623_ST1	100	100	100	23.5259	0.214179	0	19.8012	0	0	6.60416	0	0	0		0.15	0.19
ERR347624_ST1	100	100	100	23.5192	0.214179	0	19.8012	0	0	5.28057	0	0	0		0.15	0.19
ERR347625_ST1	100	100	100	23.5259	0.235596	0	19.8012	0	0	6.63174	0	0	0		0.15	0.19
ERR347626_ST1	100	100	100	23.5192	0.214179	0	19.8012	0	0	6.24569	0	0	0		0.15	0.19
ERR347627_ST1	100	100	100	23.5192	0.224888	0	19.8012	0	0	6.60416	0	0	0		0.15	0.19
ERR347628_ST1	100	100	100	23.6993	0.214179	0	19.8012	0	0	3.81911	0	0	0		0.15	0.19
ERR347629_ST1	100	100	100	23.5192	0.235596	0	19.8012	0	0	6.72825	0	0	0		0.15	0.19
ERR347630_ST1	100	100	100	23.6259	0.224888	0	19.8012	0	0	6.87991	0	0	0		0.15	0.19
ERR347631_ST1	100	100	100	23.5125	0.214179	0	19.8012	0	0	6.6731	0	0	0		0.15	0.19
ERR347632_ST1	100	100	100	23.8127	0.224888	0	19.8012	0	0	6.92127	0	0	0		0.15	0.19
ERR347634_ST1	100	100	100	23.5192	0.214179	0	19.8012	0	0	6.28705	0	0	0		0.15	0.19
ERR347635_ST1	100	100	100	23.686	0.214179	0	19.8012	0	0	5.83207	0	0	0		0.15	0.19
ERR347636_ST1	100	100	100	23.7193	0.235596	0	19.8012	0	0	6.8937	0	0	0		0.15	0.19
ERR347637_ST1	100	100	100	23.5192	0.214179	0	19.8012	0	0	6.94885	0	0	0		0.15	0.19
ERR347638_ST1	100	100	100	23.8127	0.214179	0	19.9039	0	0	6.3422	0	0	0		0.15	0.19
ERR347639_ST1	100	100	100	23.7126	0.221318	0	19.8012	0	0	6.53523	0	0	0		0.15	0.19
ERR347640_ST1	100	100	100	23.8527	0.235596	0	19.8012	0	0	6.61795	0	0	0		0.15	0.19
ERR347641_ST1	100	100	100	23.6993	0.214179	0	19.9039	0	0	6.48008	0	0	0		0.15	0.19
ERR347642_ST1	100	100	100	23.686	0.214179	0	19.8012	0	0	6.38357	0	0.759558	0		0.15	0.19
ERR347644_ST1	100	100	100	23.7994	0.289141	0	19.8012	0	0	6.94885	0	0	0		0.15	0.19
ERR347645_ST1	100	100	100	23.5392	0.214179	0	19.8012	0	0	6.72825	0	0	0		0.15	0.19
ERR347646_ST1	100	100	100	23.5259	0.214179	0	19.8012	0	0	6.70068	0	0	0		0.15	0.19
ERR347647_ST1	100	100	100	23.806	0.292711	0	19.8012	0	0	6.60416	0	0	0		0.15	0.19
ERR347648_ST1	100	100	100	23.7593	0.214179	0	19.8012	0	0	6.85234	0	0	0		0.15	0.19
ERR347649_ST1	100	100	100	23.6326	0.217748	0	19.8012	0	0	6.81097	0	0	0		0.15	0.19
ERR347650_ST1	100	100	100	23.6259	0.214179	0	19.8012	0	0	6.42493	0	0	0		0.15	0.19
ERR347651_ST1	100	100	100	23.7126	0.235596	0	19.8012	0	0	5.74935	0	0	0		0.15	0.19
ERR347652_ST1	100	100	100	23.6926	0.235596	0	19.8012	0	0	6.87991	0	0	0		0.15	0.19
ERR347653_ST1	100	100	100	23.5125	0.221318	0	19.8012	0	0	6.31463	0	0	0		0.15	0.19
ERR347654_ST1	100	100	100	23.5125	0.214179	0	19.8012	0	0	5.85964	0	0	0		0.15	0.19
ERR347655_ST1	100	100	100	23.6193	0.214179	0	19.8012	0	0	6.31463	0	0	0		0.15	0.19
ERR347656_ST1	100	100	100	23.9728	0.235596	0	19.8012	0	0	6.81097	0	0	0		0.15	0.19
ERR347657_ST1	100	100	100	23.726	0.30342	0	19.9039	0	0	6.92127	0	0	0		0.15	0.19
ERR347658_ST1	100	100	100	23.6326	0.214179	0	19.8012	0	0	6.59038	0	0	0		0.15	0.19
ERR347659_ST1	100	100	100	23.806	0.221318	0	19.8012	0	0	7.004	0	0	0		0.15	0.19
ERR347660_ST1	100	100	100	23.7994	0.214179	0	19.8012	0	0	6.82476	0	0	0		0.15	0.19
ERR347661_ST1	100	100	100	23.7927	0.214179	0	19.8012	0	0	5.19785	0	0	0		0.15	0.19
ERR347662_ST1	100	100	100	23.9795	0.235596	0	19.8012	0	0	7.1143	0	0.767997	0		0.15	0.19
ERR347664_ST1	100	100	100	23.5526	0.239166	0	19.8012	0	0	6.93506	0	0	0		0.15	0.19
ERR347665_ST1	100	100	100	23.7593	0.274863	0	19.8012	0	0	7.05915	0	0	0		0.15	0.19
ERR347666_ST1	100	100	100	23.7994	0.224888	0	19.8012	0	0	6.57659	0	0	0		0.15	0.19
ERR347667_ST1	100	100	100	23.7193	0.235596	0	19.9039	0	0	6.94885	0	0	0		0.15	0.19
ERR347668_ST1	100	100	100	23.7193	0.271293	0	19.8012	0	0	5.50117	0	0	0		0.15	0.19
ERR347669_ST1	100	100	100	23.726	0.214179	0	19.8012	0	0	6.57659	0	0	0		0.15	0.19
ERR347670_ST1	100	100	100	23.7727	0.292711	0	19.8012	0	0	7.2246	0	0	0		0.15	0.19
ERR347671_ST1	100	100	100	23.6993	0.221318	0	19.8012	0	0	6.97642	0	0	0		0.15	0.19
ERR347672_ST1	100	100	100	23.6926	0.271293	0	19.8012	0	0	6.48008	0	0	0		0.15	0.19
ERR347673_ST1	100	100	100	23.806	0.221318	0	19.8012	0	0	6.52144	0	0.767997	0		0.15	0.19
ERR347675_ST1	100	100	100	23.7193	0.224888	0	19.8012	0	0	6.71446	0	0	0		0.15	0.19
ERR347676_ST1	100	100	100	23.6993	0.214179	0	19.8012	0	0	6.13539	0	0	0		0.15	0.19
ERR347677_ST1	100	100	100	23.7593	0.224888	0	19.7418	0	0	7.1143	0	0	0		0.15	0.19
ERR347678_ST1	100	100	100	23.6993	0.217748	0	19.8012	0	0	6.65931	0	0	0		0.15	0.19
ERR347679_ST1	100	100	100	23.706	0.271293	0	19.8012	0	0	5.90101	0	0	0		0.15	0.19
ERR347680_ST1	100	100	100	23.6726	0.217748	0	19.8012	0	0	6.59038	0	0	0		0.15	0.19
ERR347681_ST1	100	100	100	23.806	0.217748	0	19.8012	0	0	6.61795	0	0	0		0.15	0.19
ERR347682_ST1	100	100	100	23.766	0.235596	0	19.8012	0	0	7.25217	0	0	0		0.15	0.19
ERR347683_ST1	100	100	100	23.5059	0.214179	0	19.8012	0	0	6.48008	0	0	0		0.15	0.19
ERR347684_ST1	100	100	100	23.7126	0.885272	0	19.8012	0	0	6.48008	0	0	0		0.15	0.19
ERR347685_ST1	100	100	100	23.766	0.214179	0	19.8012	0	0	6.82476	0	0.759558	0		0.15	0.19
ERR347686_ST1	100	100	100	23.806	0.214179	0	19.8012	0	0.0919741	6.49386	0	0	0		0.15	0.19
ERR347687_ST1	100	100	100	23.5259	0.214179	0	19.8012	0	0	5.43223	0	0	0		0.15	0.19
ERR347688_ST1	100	100	100	23.806	0.224888	0	19.8012	0	0	7.34868	0	0	0		0.15	0.19
ERR347689_ST1	100	0	0	23.7193	0.214179	0	19.8012	0	0	0	0	0	0		0.15	0.19
ERR347690_ST1	100	100	100	23.8127	0.217748	0	19.8012	0	0	6.81097	0	0	0		0.15	0.19
ERR347691_ST1	100	100	100	23.8127	0.217748	0	19.8012	0	0	7.08672	0	0	0		0.15	0.19
ERR347692_ST1	100	100	100	23.6393	0.214179	0	19.8012	0	0	6.35599	0	0	0		0.15	0.19
ERR347693_ST1	100	100	100	23.7126	0.285571	0	19.8012	0	0	6.52144	0	0	0		0.15	0.19
ERR347694_ST1	100	100	100	23.806	0.214179	0	19.8012	0	0.0919741	6.3422	0	0	0		0.15	0.19
ERR347695_ST1	100	100	100	23.5259	0.221318	0	19.8012	0	0.145222	8.63091	0	0	0		0.15	0.19
ERR347696_ST1	100	100	100	23.5059	0.285571	0	19.8012	0	0	5.05998	0	0	0		0.15	0.19
ERR347697_ST1	100	100	100	23.6193	0.214179	0	19.8012	0	0	6.43872	0	0	0		0.15	0.19
ERR347698_ST1	100	100	100	23.5059	0.214179	0	19.8012	0	0	5.72177	0	0	0		0.15	0.19
ERR347699_ST1	100	100	100	23.6059	0.214179	0	19.8012	0	0	6.09403	0	0	0		0.15	0.19
ERR347700_ST1	100	100	100	23.5059	0.214179	0	19.8012	0	0	6.42493	0	0	0		0.15	0.19
ERR347701_ST1	100	100	100	23.7527	0.224888	0	19.8012	0	0	6.57659	0	0	0		0.15	0.19
ERR347702_ST1	100	100	100	23.5192	0.214179	0	19.8012	0	0	6.35599	0	0	0		0.15	0.19
ERR347703_ST1	100	100	100	23.666	0.214179	0	19.8012	0	0	6.50765	0	0	0		0.15	0.19
ERR347704_ST1	100	100	100	23.5192	0.214179	0	19.8012	0	0	6.41114	0	0	0		0.15	0.19
ERR347705_ST1	100	100	100	23.8394	0.214179	0	19.8012	0	0	6.49386	0	0	0		0.15	0.19
ERR347706_ST1	100	100	100	23.5059	0.885272	0	19.8012	0	0	6.49386	0	0	0		0.15	0.19
ERR347707_ST1	100	100	100	23.5792	0.221318	0	19.8012	0	0	6.92127	0	0	0		0.15	0.19
ERR347708_ST1	100	100	100	23.7727	0.467623	0	19.8012	0	0	7.1143	0	0	0		0.15	0.19
ERR347710_ST1	100	100	100	23.7193	0.40337	0	19.8012	0	0	6.94885	0	0	0		0.15	0.19
ERR347711_ST1	100	100	100	23.8394	0.217748	0	19.8012	0	0	7.10051	0	0	0		0.15	0.19
ERR347712_ST1	100	100	100	23.5326	0.217748	0	19.8012	0	0	6.83855	0	0	0		0.15	0.19
ERR347713_ST1	100	100	100	23.766	0.271293	0	19.812	0	0.0919741	7.21081	0	0	0		0.15	0.19
ERR347714_ST1	100	100	100	23.746	0.214179	0	19.8012	0	0	6.39735	0	0	0		0.15	0.19
ERR347716_ST1	100	100	100	23.5392	0.217748	0	19.8012	0	0	6.90749	0	0	0		0.15	0.19
ERR347717_ST1	100	100	100	23.7193	0.235596	0	19.8012	0	0	6.46629	0	0	0		0.15	0.19
ERR347718_ST1	100	100	100	23.706	0.228457	0	19.8012	0	0	7.2246	0	0	0		0.15	0.19
ERR347719_ST1	100	100	100	23.706	0.214179	0	19.8012	0	0	7.21081	0	0	0		0.15	0.19
ERR347722_ST1	100	100	100	23.5659	0.235596	0	19.8012	0	0	6.94885	0	0	0		0.15	0.19
ERR347723_ST1	100	100	100	23.7126	0.214179	0	19.8012	0	0	7.27975	0	0	0		0.15	0.19
ERR347725_ST1	100	100	100	23.6126	0.214179	0	19.8012	0	0	6.86612	0	0	0		0.15	0.19
ERR347728_ST1	100	100	100	23.8461	0.271293	0	19.9039	0	0	7.18323	0	0	0		0.15	0.19
ERR347729_ST1	100	100	100	23.8127	0.224888	0	19.8012	0	0	7.34868	0	0	0		0.15	0.19
ERR347730_ST1	100	100	100	23.6393	0.235596	0	19.8012	0	0	6.94885	0	0	0		0.15	0.19
ERR347731_ST1	100	100	100	23.7193	0.271293	0	19.8012	0	0	7.004	0	0	0		0.15	0.19
ERR347734_ST1	100	100	100	23.5259	0.235596	0	19.8012	0	0	7.2246	0	0	0		0.15	0.19
ERR347735_ST1	100	100	100	23.9328	0.224888	0	19.8012	0	0	6.93506	0	0	0		0.15	0.19
ERR347736_ST1	100	100	100	23.7193	0.235596	0	19.8012	0	0	6.81097	0	0	0		0.15	0.19
ERR347737_ST1	100	100	100	23.6993	0.214179	0	19.8012	0	0	7.19702	0	0	0		0.15	0.19
ERR347738_ST1	100	100	100	23.7126	0.271293	0	19.8012	0	0	6.96264	0	0	0		0.15	0.19
ERR347740_ST1	100	100	100	23.726	0.224888	0	19.8012	0	0	6.96264	0	0	0.0562047		0.15	0.19
ERR347741_ST1	100	0	1.74616	23.8594	0.271293	0	19.8012	0	0	0	0	0	0		0.15	0.19
ERR347742_ST1	100	100	100	23.7193	0.235596	0	19.8012	0	0	7.01779	0	0	0		0.15	0.19
ERR347743_ST1	100	100	100	23.7593	0.271293	0	19.8012	0	0	7.15566	0	0	0		0.15	0.19
ERR347744_ST1	100	100	100	23.5125	0.217748	0	19.8012	0	0	6.65931	0	0	0		0.15	0.19
ERR347747_ST1	100	100	100	23.5259	0.214179	0	19.8012	0	0	6.01131	0	0	0		0.15	0.19
ERR347748_ST1	100	100	100	23.5792	0.214179	0	19.8012	0	0	5.68041	0	0	0		0.15	0.19
ERR347749_ST1	100	100	100	23.7193	0.271293	0	19.8012	0	0	7.04536	0	0	0		0.15	0.19
ERR347750_ST1	100	100	100	23.5326	0.224888	0	19.8012	0	0	6.54901	0	0	0		0.15	0.19
ERR347751_ST1	100	100	100	23.6393	0.224888	0	19.8012	0	0	7.18323	0	0	0		0.15	0.19
ERR347752_ST1	100	100	100	23.5259	0.217748	0	19.8012	0	0	6.42493	0	0	0		0.15	0.19
ERR347753_ST1	100	100	100	23.5259	0.214179	0	19.8012	0	0	4.67393	0	0	0		0.15	0.19
ERR347754_ST1	100	100	100	23.6726	0.235596	0	19.8012	0	0	6.16297	0	0	0		0.15	0.19
ERR347755_ST1	100	100	100	23.5592	0.214179	0	19.8012	0	0	6.38357	0	0	0		0.15	0.19
ERR347756_ST1	100	100	100	23.5592	0.217748	0	19.8012	0	0	6.63174	0	0	0		0.15	0.19
ERR347759_ST1	100	100	100	23.5192	0.271293	0	19.8012	0	0	6.30084	0	0	0		0.15	0.19
ERR347760_ST1	100	100	100	23.5059	0.214179	0	19.8012	0	0	5.30815	0	0	0		0.15	0.19
ERR347761_ST1	100	100	100	23.6459	0.271293	0	19.8012	0	0	7.27975	0	0	0		0.15	0.19
ERR347762_ST1	100	100	100	23.5859	0.217748	0	19.8012	0	0	7.23838	0	0	0		0.15	0.19
ERR347763_ST1	100	100	100	23.5326	0.224888	0	19.8066	0	0	6.76961	0	0	0		0.15	0.19
ERR347764_ST1	100	100	100	23.5192	0.217748	0	19.8012	0	0	5.81828	0	0	0.82828		0.15	0.19
ERR347765_ST1	100	100	100	23.5592	0.235596	0	19.8012	0	0	7.18323	0	0	0		0.15	0.19
ERR347766_ST1	100	100	100	23.6393	0.235596	0	19.8012	0	0	6.99021	0	0	0		0.15	0.19
ERR347767_ST1	100	100	100	23.746	0.224888	0	19.8012	0	0	7.2246	0	0	0		0.15	0.19
ERR347770_ST1	100	100	100	23.5392	0.217748	0	19.8012	0	0	7.04536	0	0	0		0.15	0.19
ERR347771_ST1	100	100	100	23.6793	0.235596	0	19.8012	0	0	6.8937	0	0	0		0.15	0.19
ERR347772_ST1	100	100	100	23.5192	0.224888	0	19.8012	0	0	5.74935	0	0	0		0.15	0.19
ERR347773_ST1	100	100	100	23.6526	0.235596	0	19.8012	0	0	6.68689	0	0	0		0.15	0.19
ERR347774_ST1	100	100	100	23.5459	0.217748	0	19.8012	0	0	6.82476	0	0	0		0.15	0.19
ERR347775_ST1	100	100	100	23.6459	0.214179	0	19.8012	0	0	6.70068	0	0	0		0.15	0.19
ERR347776_ST1	100	100	100	23.6393	0.224888	0	19.8012	0	0	6.8937	0	0	0		0.15	0.19
ERR347777_ST1	100	100	100	23.5326	0.214179	0	19.8012	0	0	6.90749	0	0	0		0.15	0.19
ERR347778_ST1	100	100	100	23.8594	0.221318	0	19.8012	0	0	6.93506	0	0	0		0.15	0.19
ERR347780_ST1	100	100	100	23.6726	0.214179	0	19.8012	0	0	6.90749	0	0	0		0.15	0.19
ERR347781_ST1	100	100	100	23.8127	0.217748	0	19.8012	0	0	6.94885	0	0	0		0.15	0.19
ERR347782_ST1	100	100	100	23.6393	0.214179	0	19.8012	0	0	6.86612	0	0	0		0.15	0.19
ERR347783_ST1	100	100	100	23.5326	0.214179	0	19.8012	0	0	6.70068	0	0	0		0.15	0.19
ERR347784_ST1	100	100	100	23.706	0.214179	0	19.8012	0	0	7.41762	0	0	0		0.15	0.19
ERR347785_ST1	100	100	100	23.5526	0.214179	0	19.8012	0	0	6.82476	0	0	0		0.15	0.19
ERR347786_ST1	100	100	100	24.1195	0.217748	0	19.8012	0	0	7.26596	0	0	0		0.15	0.19
ERR347787_ST1	100	100	100	23.5259	0.214179	0	19.8012	0	0	6.7834	0	0	0		0.15	0.19
ERR347788_ST1	100	100	100	23.6259	0.217748	0	19.8012	0	0	6.3422	0	0	0		0.15	0.19
ERR347789_ST1	100	100	100	23.5392	0.271293	0	19.8012	0	0	7.18323	0	0	0		0.15	0.19
ERR347792_ST1	100	100	100	23.5259	0.221318	0	19.8012	0	0	6.94885	0	0	0		0.15	0.19
ERR347793_ST1	100	100	100	23.766	0.274863	0	19.8012	0	0	7.21081	0	0	0		0.15	0.19
ERR347794_ST1	100	100	100	23.806	0.214179	0	19.8012	0	0	6.76961	0	0	0		0.15	0.19
ERR347795_ST1	100	100	100	23.6393	0.217748	0	19.8012	0	0	6.92127	0	0	0		0.15	0.19
ERR347796_ST1	100	100	100	23.666	0.214179	0	19.8012	0	0	6.81097	0	0	0		0.15	0.19
ERR347797_ST1	100	100	100	23.8461	0.235596	0	19.8012	0	0	7.29353	0	0	0		0.15	0.19
ERR347798_ST1	100	100	100	23.5326	0.217748	0	19.8012	0	0	6.38357	0	0	0		0.15	0.19
ERR347799_ST1	100	100	100	23.5326	0.214179	0	19.8012	0	0	6.25948	0	0	0		0.15	0.19
ERR347800_ST1	100	100	100	23.6326	0.214179	0	19.8012	0	0	7.26596	0	0	0		0.15	0.19
ERR347801_ST1	100	100	100	23.7527	0.224888	0	19.8012	0	0	6.61795	0	0	0		0.15	0.19
ERR347804_ST1	100	100	100	23.5125	0.214179	0	19.8012	0	0	7.10051	0	0	0		0.15	0.19
ERR347805_ST1	100	100	100	23.5259	0.214179	0	19.8012	0	0	6.8937	0	0	0		0.15	0.19
ERR347806_ST1	100	100	100	23.5192	0.214179	0	19.8012	0	0	6.5628	0	0	0		0.15	0.19
ERR347807_ST1	100	100	100	23.5259	0.271293	0	19.8012	0	0	6.75583	0	0	0		0.15	0.19
ERR347808_ST1	100	100	100	23.5659	0.224888	0	19.8012	0	0	6.63174	0	0	0		0.15	0.19
ERR347809_ST1	100	100	100	23.6259	0.221318	0	19.8012	0	0	6.94885	0	0	0		0.15	0.19
ERR347810_ST1	100	100	100	23.7126	0.235596	0	19.8066	0	0	6.71446	0	0	0		0.15	0.19
ERR347811_ST1	100	100	100	23.8594	0.235596	0	19.8012	0	0	6.43872	0	0	0		0.15	0.19
ERR347812_ST1	100	100	100	23.5326	0.224888	0	19.8012	0	0	6.85234	0	0	0		0.15	0.19
ERR347813_ST1	100	100	100	23.5259	0.221318	0	19.8012	0	0	6.83855	0	0	0		0.15	0.19
ERR347816_ST1	100	100	100	23.5659	0.214179	0	19.8012	0	0	7.19702	0	0	0		0.15	0.19
ERR347817_ST1	100	100	100	23.5726	0.214179	0	19.8012	0	0	6.54901	0	0	0		0.15	0.19
ERR347818_ST1	100	100	100	23.5259	0.221318	0	19.8012	0	0	6.27327	0	0	0		0.15	0.19
ERR347819_ST1	100	100	100	23.8727	0.235596	0	19.8012	0	0	7.37626	0	0	0		0.15	0.19
ERR347820_ST1	100	100	100	23.5792	0.217748	0	19.8012	0	0	6.79719	0	0	0		0.15	0.19
ERR347821_ST1	100	100	100	23.5259	0.224888	0	19.8012	0	0	5.87343	0	0	0		0.15	0.19
ERR347822_ST1	100	100	100	23.6326	0.217748	0	19.8066	0	0	6.64553	0	0	0		0.15	0.19
ERR347823_ST1	100	100	100	23.6726	0.224888	0	19.8012	0	0	7.12808	0	0	0		0.15	0.19
ERR347824_ST1	100	100	100	23.7994	0.235596	0	19.8012	0	0	7.29353	0	0	0		0.15	0.19
ERR347825_ST1	100	100	100	23.5659	0.217748	0	19.8012	0	0	5.48738	0	0	0		0.15	0.19
ERR347828_ST1	100	100	100	23.6393	0.224888	0	19.8012	0	0	6.59038	0	0	0		0.15	0.19
ERR347829_ST1	100	100	100	23.5792	0.235596	0	19.8012	0	0	6.75583	0	0	0		0.15	0.19
ERR347830_ST1	100	100	100	23.6459	0.235596	0	19.8012	0	0	7.08672	0	0	0		0.15	0.19
ERR347831_ST1	100	100	100	23.5192	0.214179	0	19.8012	0	0	6.64553	0	0	0		0.15	0.19
ERR347832_ST1	100	100	100	23.6993	0.217748	0	19.8012	0	0	7.25217	0	0	0		0.15	0.19
ERR347833_ST1	100	100	100	23.5326	0.214179	0	19.8012	0	0	5.70798	0	0	0		0.15	0.19
ERR347834_ST1	100	100	100	23.5859	0.235596	0	19.9039	0	0	6.97642	0	0	0		0.15	0.19
ERR347835_ST1	100	100	100	23.6259	0.224888	0	19.8012	0	0	7.4452	0	0	0		0.15	0.19
ERR347929_ST1	100	100	100	23.5326	0.224888	0	19.8012	0	0	6.92127	0	0	0		0.15	0.19
ERR347930_ST1	100	100	100	24.0795	0.713929	0.292128	20.8599	0.110914	0.45987	7.76231	0.282318	0.244746	0.0562047		0.15	0.19
ERR347931_ST1	100	100	100	23.8194	0.571143	0.292128	20.2117	0	0.45987	7.81745	0.282318	0.168791	0.112409		0.15	0.19
ERR347933_ST1	100	100	100	23.8327	0.713929	0.146064	20.9625	0.110914	0.377578	8.17593	0.282318	0.244746	0.112409		0.15	0.19
ERR347934_ST1	100	100	100	24.0662	0.778182	0.292128	20.9625	0.110914	0.561526	7.65201	0.579495	0.244746	0.0562047		0.15	0.19
ERR347935_ST1	100	100	100	24.0595	0.90312	0.430504	20.9031	0.216282	0.6535	8.25865	0.297177	0.53169	0.112409		0.15	0.19
ERR347936_ST1	100	100	100	23.8461	0.706789	0.146064	20.5466	0.110914	0.19363	7.12808	0	0.244746	0.0562047		0.15	0.19
ERR347947_ST1	100	100	100	24.1729	0.888841	0.292128	20.8599	0.216282	0.285604	7.08672	0.297177	0.244746	0		0.15	0.19
ERR347950_ST1	100	100	100	24.0662	0.928107	0.292128	20.9625	0.216282	0.561526	8.12078	0.579495	0.244746	0.0562047		0.15	0.19
ERR347951_ST1	100	100	100	23.9661	0.849575	0.146064	20.9625	0.216282	0.469552	7.29353	0.297177	0.244746	0.0562047		0.15	0.19
ERR347952_ST1	100	100	100	24.2062	5.14743	0.292128	20.9085	0.216282	0.561526	8.3138	0.282318	0.244746	0.0562047		0.15	0.19
ERR347953_ST1	100	100	100	23.826	0.788891	0.292128	20.9571	0.216282	0.469552	7.40383	0.579495	0.244746	0.0562047		0.15	0.19
ERR347954_ST1	100	100	100	23.9528	0.888841	0.146064	20.6492	0.216282	0.6535	8.32759	0.282318	0.244746	0.0562047		0.15	0.19
ERR347956_ST1	100	0	0.428047	23.7126	0.224888	0	19.8012	0	0	0	0	0	0		0.15	0.19
ERR347957_ST1	100	100	100	23.7126	0.217748	0	19.8012	0	0	6.83855	0	0	0		0.15	0.19
ERR347958_ST1	100	100	100	23.6326	0.217748	0	19.8012	0	0	6.94885	0	0	0		0.15	0.19
ERR347959_ST1	100	100	100	23.7126	0.224888	0	19.8012	0	0	6.8937	0	0	0		0.15	0.19
ERR347961_ST1	100	100	100	23.5326	0.214179	0	19.8012	0	0	7.05915	0	0	0		0.15	0.19
ERR347962_ST1	100	100	100	23.5192	0.221318	0	19.8012	0	0	6.65931	0	0	0		0.15	0.19
ERR347963_ST1	100	0	0	23.5125	0.39623	0	19.8012	0	0	0	0	0	0		0.15	0.19
ERR347965_ST1	100	100	100	23.806	0.945956	0	19.8012	0	0	7.08672	0	0	0		0.15	0.19
ERR347966_ST1	100	100	100	23.5659	0.349825	0	19.8012	0	0	6.7834	0	0	0		0.15	0.19
ERR347968_ST1	100	100	100	23.6326	0.274863	0	19.8012	0	0	12.643	6.55275	0	0		0.15	0.19
ERR347969_ST1	100	100	100	23.5125	0.271293	0	19.8012	0	0	6.3422	0	0	0		0.15	0.19
ERR347970_ST1	100	100	100	23.5326	0.217748	0	19.8012	0	0	6.49386	0	0	0		0.15	0.19
ERR347972_ST1	100	100	100	24.3997	0.224888	0	19.8012	0	0	7.01779	0	0	0		0.15	0.19
ERR347973_ST1	100	100	100	23.6926	0.271293	0	19.8012	0	0	7.1143	0	0	0		0.15	0.19
ERR347974_ST1	100	100	100	23.8727	0.214179	0	19.8012	0	0	6.54901	0	0	0		0.15	0.19
ERR347978_ST1	100	100	100	23.766	0.235596	0	19.8012	0	0	6.5628	0	0	0		0.15	0.19
ERR347979_ST1	100	100	100	23.7126	0.339116	0	19.8012	0	0	6.99021	0	0	0		0.15	0.19
ERR347980_ST1	100	100	100	24.0995	0.214179	0	19.8012	0	0	7.05915	0	0	0		0.15	0.19
ERR347981_ST1	100	100	100	23.6393	0.214179	0	19.9039	0	0	6.83855	0	0	0		0.15	0.19
ERR347982_ST1	100	0.133248	0.67944	23.5592	0.257014	0	19.8012	0	0	0	0	0	0		0.15	0.19
ERR347983_ST1	100	100	100	23.706	0.274863	0	19.8012	0	0	6.93506	0	0	0		0.15	0.19
ERR347986_ST1	100	100	100	23.7126	0.217748	0	19.8012	0	0	6.76961	0	0	0		0.15	0.19
ERR347987_ST1	100	100	100	23.7727	0.217748	0	19.8012	0	0	7.12808	0	0	0		0.15	0.19
ERR347988_ST1	100	100	100	23.8194	0.217748	0	19.8012	0	0	7.23838	0	0	0		0.15	0.19
ERR347989_ST1	100	100	100	23.706	0.271293	0	19.8012	0	0	7.2246	0	0	0		0.15	0.19
ERR347990_ST1	100	0	0.733795	23.6993	0.217748	0	19.8012	0	0	0	0	0	0		0.15	0.19
ERR347991_ST1	100	100	100	24.333	1.52067	0	20.7411	0.216282	0.367896	7.4452	0.282318	0.244746	0.0562047		0.15	0.19
ERR348049_ST1	100	0	0	23.7126	0.221318	0	19.8012	0	0	0	0	0	0		0.15	0.19
ERR348050_ST1	100	100	100	23.6993	0.221318	0	19.8012	0	0	6.76961	0	0	0		0.15	0.19
ERR348051_ST1	100	100	100	23.5059	0.224888	0	19.8012	0	0	6.42493	0	0	0		0.15	0.19
ERR348052_ST1	100	100	100	23.7593	0.224888	0	19.8012	0	0	6.99021	0	0	0		0.15	0.19
ERR348054_ST1	100	100	100	23.7126	0.214179	0	19.8012	0	0	6.7834	0	0	0		0.15	0.19
ERR348055_ST1	100	100	100	23.5259	0.217748	0	19.8012	0	0	6.96264	0	0	0		0.15	0.19
ERR348056_ST1	100	0	0.122299	23.5859	0.214179	0	19.8012	0	0	0	0	0	0		0.15	0.19
ERR348058_ST1	100	100	100	23.5792	0.271293	0	19.8012	0	0	6.87991	0	0	0		0.15	0.19
ERR348059_ST1	100	100	100	31.3701	0.224888	0	19.8012	0	0	7.25217	0	0	0		0.15	0.19
ERR348061_ST1	100	100	100	23.7927	0.217748	0	19.812	0	0	13.0153	6.34473	0	0		0.15	0.19
ERR348062_ST1	100	100	100	23.6993	2.58799	0	19.8012	0	0	7.18323	0	0	0		0.15	0.19
ERR348063_ST1	100	100	100	23.7593	0.214179	0	19.8012	0	0	6.59038	0	0	0		0.15	0.19
ERR348065_ST1	100	100	100	23.8127	0.221318	0	19.8012	0	0	7.12808	0	0	0		0.15	0.19
ERR348066_ST1	100	100	100	23.5392	0.224888	0	19.8012	0	0	6.79719	0	0	0		0.15	0.19
ERR348067_ST1	100	100	100	23.726	0.214179	0	19.8012	0	0	6.20433	0	0	0		0.15	0.19
ERR348071_ST1	100	100	100	23.686	0.224888	0	19.8012	0	0	6.97642	0	0	0		0.15	0.19
ERR348072_ST1	100	100	100	23.5326	0.224888	0	19.8012	0	0	6.52144	0	0	0		0.15	0.19
ERR348073_ST1	100	100	100	23.726	0.339116	0	19.8012	0	0	7.10051	0	0	0		0.15	0.19
ERR348074_ST1	100	100	100	23.7193	0.214179	0	19.8012	0	0	6.96264	0	0	0		0.15	0.19
ERR348075_ST1	100	0	0	23.7727	0.224888	0	19.8012	0	0	0	0	0	0		0.15	0.19
ERR348076_ST1	100	100	100	23.806	0.271293	0	19.8012	0	0	7.25217	0	0	0		0.15	0.19
ERR348079_ST1	100	100	100	23.8127	0.235596	0	19.8012	0	0	7.08672	0	0	0		0.15	0.19
ERR348080_ST1	100	100	100	23.5459	0.224888	0	19.8012	0	0	6.87991	0	0	0		0.15	0.19
ERR348084_ST1	100	100	100	23.806	0.278432	0	19.8012	0	0	6.93506	0	0	0		0.15	0.19
ERR348092_ST1	100	0	0.33972	23.5125	0.221318	0	19.8012	0	0	0	0	0	0		0.15	0.19
ERR467549_ST1	100	100	100	23.9995	0.214179	0.292128	19.9633	0.110914	0.377578	6.6731	0	0.244746	0		0.15	0.19
ERR467551_ST1	100	100	100	23.8527	0.30342	0.146064	20.2711	0.216282	0	6.60416	0	0.244746	0		0.15	0.19
ERR467553_ST1	100	100	100	23.9795	0.349825	0.292128	20.0065	0.110914	0.285604	6.32842	0	0.194109	0		0.15	0.19
ERR467554_ST1	100	100	100	23.9795	0.353395	0	19.9039	0.110914	0	6.53523	0	0.244746	0		0.15	0.19
ERR467556_ST1	100	100	100	24.0528	0.353395	0.146064	20.0065	0.110914	0.19363	6.92127	0	0.244746	0		0.15	0.19
ERR467557_ST1	100	100	100	23.9528	0.417648	0.146064	20.0065	0.216282	0.0919741	5.51496	0	0.244746	0		0.15	0.19
ERR467558_ST1	100	100	100	24.0595	0.292711	0.146064	20.0065	0.110914	0.0919741	6.85234	0	0.244746	0		0.15	0.19
ERR467560_ST1	100	100	100	24.0995	0.349825	0.146064	20.1199	0.110914	0.183948	5.98373	0	0.244746	0		0.15	0.19
ERR467561_ST1	100	100	100	23.8327	0.471193	0.146064	20.1145	0.110914	0.367896	5.85964	0	0	0		0.15	0.19
ERR467562_ST1	100	100	100	23.9461	0.374813	0.146064	19.9039	0.105368	0.275922	6.61795	0	0.244746	0		0.15	0.19
ERR467564_ST1	100	100	100	24.0995	0.428357	0.146064	20.3252	0.216282	0.377578	6.61795	0.297177	0.244746	0		0.15	0.19
ERR467566_ST1	100	100	100	23.8527	0.349825	0.292128	19.9039	0.110914	0.183948	6.52144	0	0.244746	0		0.15	0.19
ERR467576_ST1	100	100	100	24.0462	0.353395	0.146064	20.0119	0.110914	0.19363	6.81097	0	0.244746	0		0.15	0.19
ERR467577_ST1	100	100	100	23.686	0.492611	0.146064	21.2758	0.110914	0.0919741	6.30084	0	0.244746	0		0.15	0.19
ERR467583_ST1	100	100	100	23.9995	0.442636	0.146064	20.0065	0.216282	0.285604	7.16945	0	0.244746	0		0.15	0.19
ERR467584_ST1	100	100	100	23.9995	0.360534	0	20.0065	0.110914	0	6.94885	0	0.244746	0		0.15	0.19
ERR467589_ST1	100	100	100	23.8194	0.431927	0.292128	20.444	0.216282	0.377578	6.96264	0	0.244746	0		0.15	0.19
ERR467590_ST1	100	100	100	23.8461	0.292711	0.146064	20.0065	0.110914	0.183948	6.87991	0	0.244746	0		0.15	0.19
ERR467593_ST1	100	100	100	23.9995	0.571143	0.292128	20.552	0.110914	0.183948	6.76961	0	0	0.0562047		0.15	0.19
ERR658294_ST1	100	100	100	24.1262	0.656814	0	19.8066	0	0	8.07942	0	0	0.647833		0.15	0.19
ERR658302_ST1	100	100	100	23.8794	0.271293	0	19.8012	0	0	8.54819	0	0	0.801657		0.15	0.19
ERR658303_ST1	100	100	100	26.6409	12.6865	0	19.8066	0	4.2889	8.65849	0	0	0.825322		0.15	0.19
ERR658313_ST1	100	100	100	23.8661	0.271293	0	19.8066	0	0	8.63091	0	0	0		0.15	0.19
ERR928274_ST1	100	100	100	23.9061	0.567573	0.146064	20.8599	0.216282	0.561526	1.18572	0.297177	0.244746	0.0562047		0.15	0.19
ERR928275_ST1	100	100	100	24.453	0.574713	0.292128	20.6546	0.216282	0.6535	6.13539	0.579495	0.244746	0.0562047		0.15	0.19
ERR928277_ST1	100	100	100	24.4597	0.717498	0.292128	20.8707	0.216282	0.745474	7.26596	0.297177	0.244746	0.112409		0.15	0.19
ERR928278_ST1	100	100	100	24.333	0.574713	0.146064	20.7573	0.216282	0.551844	6.41114	0.579495	0.573888	0.112409		0.15	0.19
ERR928279_ST1	100	100	100	24.2996	0.778182	0.146064	20.7573	0.216282	0.745474	5.41845	0.579495	0.168791	0.112409		0.15	0.19
ERR928280_ST1	100	100	100	24.4597	0.785322	0.292128	20.8599	0.216282	0.745474	6.2319	0.297177	0.244746	0.112409		0.15	0.19
ERR928281_ST1	100	100	100	24.4597	0.778182	0.292128	20.8707	0.216282	0.745474	7.61064	0.579495	0.244746	0.112409		0.15	0.19
ERR928282_ST1	100	100	100	24.453	0.717498	0.292128	20.8599	0.216282	0.643818	5.41845	0.282318	0	0.112409		0.15	0.19
ERR928283_ST1	100	100	100	24.453	0.631827	0.146064	20.7573	0.110914	0.551844	6.83855	0.297177	0.236307	0.112409		0.15	0.19
ERR928284_ST1	100	100	100	24.4597	0.838866	0.292128	20.8599	0.216282	0.745474	8.16214	0.579495	0.244746	0.112409		0.15	0.19
ERR928285_ST1	100	100	100	24.4597	0.842436	0.292128	20.8707	0.216282	0.745474	8.03805	0.579495	0.227867	0.112409		0.15	0.19
ERR928287_ST1	100	100	100	24.4731	0.838866	0.292128	20.8599	0.216282	0.745474	8.10699	0.579495	0.244746	0.112409		0.15	0.19
ERR928289_ST1	100	100	100	24.4731	0.778182	0.292128	20.9625	0.216282	0.745474	8.05184	0.579495	0.244746	0.112409		0.15	0.19
ERR928290_ST1	100	100	100	24.4664	0.778182	0.292128	20.8599	0.216282	0.745474	5.17027	0.579495	0.244746	0.112409		0.15	0.19
ERR928295_ST1	100	100	100	24.4597	0.785322	0.292128	21.1192	0.216282	0.745474	8.67227	0.579495	0.244746	0.112409		0.15	0.19
ERR928296_ST1	100	100	100	24.4597	0.853145	0.292128	20.9679	0.216282	0.745474	7.36247	0.579495	0.244746	0.112409		0.15	0.19
ERR928297_ST1	100	100	100	24.4731	0.860284	0.292128	21.1192	0.216282	0.745474	8.30001	0.579495	0.244746	0.112409		0.15	0.19
ERR928298_ST1	100	100	100	24.4797	0.785322	0.292128	21.2326	0.216282	0.750315	7.99669	0.579495	0.244746	0.112409		0.15	0.19
ERR928299_ST1	100	100	100	24.4664	0.910259	0.292128	21.1138	0.216282	0.745474	7.8726	0.579495	0.244746	0.112409		0.15	0.19
ERR928300_ST1	100	100	100	24.4597	1.14229	0.292128	31.5545	0.216282	0.745474	4.01213	0.579495	0.244746	0.112409		0.15	0.19
ERR928301_ST1	100	100	100	24.4664	0.90669	0.292128	20.9679	0.216282	0.745474	8.4241	0.579495	0.244746	0.112409		0.15	0.19
ERR928302_ST1	100	100	100	24.4664	0.781752	0.292128	20.9625	0.216282	0.745474	8.24486	0.579495	0.244746	0.112409		0.15	0.19
ERR928303_ST1	100	100	100	24.4664	0.838866	0.292128	20.9625	0.216282	0.745474	8.25865	0.579495	0.253186	0.112409		0.15	0.19
ERR928305_ST1	100	100	100	24.4597	0.781752	0.292128	20.8599	0.216282	0.745474	4.61878	0.579495	0.253186	0.112409		0.15	0.19
ERR928306_ST1	100	100	100	24.4664	0.849575	0.292128	20.9625	0.216282	0.745474	5.39087	0.579495	0.244746	0.112409		0.15	0.19
ERR955906_ST1	100	100	100	24.4664	0.838866	0.292128	20.9679	0.216282	0.745474	8.4241	0.579495	0.244746	0.112409		0.15	0.19
GCA_000085225.1_Clostridioides_difficile_CD196_Complete_Genome_ST1	100	0	0	24.0728	0.214179	0	19.8012	0	0	0	0	0	0		0.15	0.19
GCA_000211235.1_Clostridioides_difficile_BI1_Complete_Genome_ST1	100	0	0	24.0728	0.221318	0	19.8012	0	0	0	0	0	0		0.15	0.19
GCA_000451065.2_Clostridioides_difficile_P23_Contig_ST1	100	0.37576	0	24.0795	0.567573	0	20.336	0	0	0	0	0	0.0562047		0.15	0.19
GCA_000451785.2_Clostridioides_difficile_P31_Contig_ST1	100	100	100	24.0728	0.214179	0	19.8012	0	0	2.26113	0	0	0		0.15	0.19
GCA_000451885.2_Clostridioides_difficile_P45_Contig_ST1	100	100	100	24.0728	0.214179	0	19.8012	0	0	2.66097	0	0	0		0.15	0.19
GCA_000826625.2_Clostridioides_difficile_G46_Contig_ST1	100	100	100	24.0728	0.235596	0	19.8012	0	0	3.86047	0	0	0		0.15	0.19
GCA_001484885.1_Clostridioides_difficile_CD26A54_R_Contig_ST1	100	100	100	24.1996	0.492611	0	20.4278	0	0.275922	3.92941	0.579495	0	0.0562047		0.15	0.19
GCA_001484895.1_Clostridioides_difficile_CD26A54_S_Contig_ST1	100	100	100	24.2062	0.356964	0	20.4278	0	0.275922	4.99104	0.579495	0	0.0562047		0.15	0.19
GCA_001971835.1_Clostridioides_difficile_20100211_Contig_ST1	100	100	100	24.333	0.631827	0.146064	20.4278	0	0.561526	1.06163	0.579495	0	0.0562047		0.15	0.19
GCA_001972015.1_Clostridioides_difficile_20110270_Contig_ST1	100	100	100	24.0728	0.214179	0	19.8012	0	0	3.2814	0	0	0		0.15	0.19
GCA_002301945.1_Clostridioides_difficile_6635-BI-ST1_Contig_ST1	100	100	100	24.0862	0.424788	0	19.9039	0	0.183948	3.65366	0	0	0		0.15	0.19
GCA_002302765.1_Clostridioides_difficile_7471-BI-ST1_Contig_ST1	100	100	100	24.0728	0.364104	0	20.336	0	0	3.08838	0	0	0.0562047		0.15	0.19
GCA_002303165.1_Clostridioides_difficile_7501-BI-ST1_Contig_ST1	100	100	100	24.0728	0.364104	0	20.336	0	0	3.70881	0	0	0.0562047		0.15	0.19
GCA_002335485.1_Clostridioides_difficile_NCKUH-21_Contig_ST1	100	0.119923	0	24.0795	0.431927	0	20.336	0	0	0	0	0	0.0562047		0.15	0.19
GCA_900007545.1_Clostridioides_difficile_VL_0002_Contig_ST1	100	100	100	24.0795	0.214179	0	19.8012	0	0	2.21977	0	0	0		0.15	0.19
GCA_900007575.1_Clostridioides_difficile_VL_0012_Contig_ST1	100	100	100	24.1996	0.49975	0	20.6492	0	0	3.70881	0	0	0.0562047		0.15	0.19
GCA_900007625.1_Clostridioides_difficile_VL_0204_Contig_ST1	100	100	100	23.7327	0.49975	0	20.2333	0	0.19363	3.91562	0	0	0.0562047		0.15	0.19
GCA_900008285.1_Clostridioides_difficile_VL_0017_Contig_ST1	100	100	100	24.1996	0.49975	0	20.3414	0.105368	0.0919741	3.76396	0	0	0.0562047		0.15	0.19
GCA_900008375.1_Clostridioides_difficile_VL_0074_Contig_ST1	100	100	100	24.333	0.428357	0	20.444	0	0	3.91562	0	0	0.0562047		0.15	0.19
GCA_900008395.1_Clostridioides_difficile_VL_0094_Contig_ST1	100	100	100	24.3263	0.282002	0	19.9093	0	0	2.78505	0	0	0		0.15	0.19
GCA_900008425.1_Clostridioides_difficile_VL_0109_Contig_ST1	100	100	97.8258	24.0795	0.364104	0	20.5466	0	0	4.27409	0	0	0.0562047		0.15	0.19
GCA_900008445.1_Clostridioides_difficile_VL_0128_Contig_ST1	99.8226	100	76.8583	23.2858	0.214179	0	19.8012	0	0	3.44685	0	0	0		0.15	0.19
GCA_900008515.1_Clostridioides_difficile_VL_0301_Contig_ST1	100	100	100	24.3263	0.435497	0	20.3414	0	0.19363	3.97077	0.282318	0	0.0562047		0.15	0.19
GCA_900008655.1_Clostridioides_difficile_VL_0435_Contig_ST1	100	100	99.8437	24.0728	0.214179	0	19.8012	0	0	3.6123	0	0	0		0.15	0.19
GCA_900008765.1_Clostridioides_difficile_VL_0319_Contig_ST1	100	100	100	24.0728	0.431927	0	20.6492	0.105368	0.183948	3.75017	0.297177	0	0.0562047		0.15	0.19
GCA_900008795.1_Clostridioides_difficile_VL_0398_Contig_ST1	100	100	100	23.9061	0.364104	0.146064	20.1307	0	0	3.76396	0	0	0.0562047		0.15	0.19
GCA_900009255.1_Clostridioides_difficile_VL_0448_Contig_ST1	100	100	100	24.2062	0.50332	0.146064	20.6492	0	0.183948	0.785882	0.282318	0	0.0562047		0.15	0.19
GCA_900009445.1_Clostridioides_difficile_VL_0349_Contig_ST1	100	100	100	24.0728	0.214179	0	19.8012	0	0.0919741	3.41927	0.282318	0	0		0.15	0.19
GCA_900009465.1_Clostridioides_difficile_VL_0388_Contig_ST1	99.973	100	100	24.0728	0.442636	0	33.2019	0	0.0919741	2.61961	0	0	0.0562047		0.15	0.19
GCA_900009475.1_Clostridioides_difficile_VL_0438_Contig_ST1	100	100	100	24.0728	0.364104	0	20.5466	0	0.183948	4.78423	0.579495	0	0.0562047		0.15	0.19
GCA_900010335.1_Clostridioides_difficile_VL_0127_Contig_ST1	100	0.471698	0	24.2062	0.574713	0	20.6546	0	0.183948	0.537709	0.297177	0	0.0562047		0.15	0.19
GCA_900010355.1_Clostridioides_difficile_VL_0146_Contig_ST1	100	100	96.2359	24.0795	0.567573	0.292128	20.2333	0	0	3.92941	0	0	0.0562047		0.15	0.19
GCA_900010385.1_Clostridioides_difficile_VL_0412_Contig_ST1	100	100	100	24.2062	0.282002	0	19.8012	0	0	2.13705	0	0	0		0.15	0.19
GCA_900010425.1_Clostridioides_difficile_VL_0468_Contig_ST1	100	0.3118	0	25.3002	49.5145	0.146064	19.9039	0.343833	0.363055	0	0	0	0.233693		0.15	0.19
GCA_900010505.1_Clostridioides_difficile_VL_0390_Contig_ST1	100	100	100	24.0728	0.364104	0	20.7519	0	0.183948	4.34303	0.297177	0	0.0562047		0.15	0.19
GCA_900010875.1_Clostridioides_difficile_VL_0022_Contig_ST1	100	100	94.3742	24.0795	0.282002	0	19.9039	0	0	4.09486	0	0	0		0.15	0.19
GCA_900010885.1_Clostridioides_difficile_VL_0011_Contig_ST1	100	100	100	23.7393	0.214179	0	19.8012	0	0	3.58472	0	0	0		0.15	0.19
GCA_900011105.1_Clostridioides_difficile_VL_0177_Contig_ST1	100	100	100	24.2062	0.431927	0.146064	20.2333	0.216282	0.183948	0	0	0	0.0562047		0.15	0.19
GCA_900011165.1_Clostridioides_difficile_VL_0420_Contig_ST1	100	100	99.6671	24.1996	0.364104	0	20.5466	0	0.0919741	3.12974	0.297177	0	0.0562047		0.15	0.19
GCA_900011385.1_Clostridioides_difficile_VL_0050_Contig_ST1	100	100	100	24.0795	0.364104	0	20.2441	0.105368	0.19363	3.22625	0	0	0.0562047		0.15	0.19
GCA_900011675.1_Clostridioides_difficile_VL_0193_Contig_ST1	100	100	100	24.1996	0.364104	0	20.444	0	0	2.37143	0	0	0.0562047		0.15	0.19
GCA_900011905.1_Clostridioides_difficile_VL_0081_Contig_ST1	100	100	100	24.0795	0.360534	0	20.1307	0	0.19363	3.52957	0	0	0		0.15	0.19
GCA_900011915.1_Clostridioides_difficile_VL_0082_Contig_ST1	100	100	100	24.0728	0.214179	0	19.8012	0	0	3.81911	0	0	0		0.15	0.19
GCA_900011955.1_Clostridioides_difficile_VL_0090_Contig_ST1	100	100	100	24.0728	0.364104	0	20.444	0.105368	0.183948	4.01213	0.579495	0	0.0562047		0.15	0.19
GCA_900011965.1_Clostridioides_difficile_VL_0092_Contig_ST1	100	100	100	24.0728	0.364104	0	20.6492	0	0.0919741	2.88157	0.297177	0	0.0562047		0.15	0.19
GCA_900012035.1_Clostridioides_difficile_VL_0108_Contig_ST1	100	0.783499	0	24.2062	0.50332	0	20.5466	0	0	0.261961	0	0	0.0562047		0.15	0.19
GCA_900012055.1_Clostridioides_difficile_VL_0114_Contig_ST1	100	100	100	24.0728	0.214179	0	19.8012	0	0	4.02592	0	0	0		0.15	0.19
GCA_900012105.1_Clostridioides_difficile_VL_0119_Contig_ST1	100	100	100	24.0728	0.364104	0	20.5466	0	0.0919741	3.54336	0.297177	0	0.0562047		0.15	0.19
GCA_900012115.1_Clostridioides_difficile_VL_0120_Contig_ST1	100	100	99.803	24.0728	0.214179	0	19.7958	0	0	2.49552	0	0	0		0.15	0.19
GCA_900012165.1_Clostridioides_difficile_VL_0142_Contig_ST1	99.6144	100	57.4331	24.0795	0.214179	0	19.8012	0	0	0	0	0	0		0.15	0.19
GCA_900012305.1_Clostridioides_difficile_VL_0174_Contig_ST1	100	100	100	24.7132	56.6502	0	20.66	0.36047	0.183948	4.56363	0.297177	0	0.0562047		0.15	0.19
GCA_900012455.1_Clostridioides_difficile_VL_0066_Contig_ST1	100	100	96.6639	24.2062	0.431927	0.146064	20.552	0	0.0919741	2.9505	0.282318	0	0.0562047		0.15	0.19
GCA_900012465.1_Clostridioides_difficile_VL_0162_Contig_ST1	100	100	100	24.0795	0.49975	0	20.6492	0.105368	0.377578	3.68124	0.297177	0	0.0562047		0.15	0.19
GCA_900012475.1_Clostridioides_difficile_VL_0222_Contig_ST1	100	100	100	24.2129	0.431927	0	20.336	0	0.19363	3.95698	0	0	0.0562047		0.15	0.19
GCA_900012835.1_Clostridioides_difficile_VL_0196_Contig_ST1	100	99.8534	95.9641	24.0728	0.214179	0	19.8012	0	0	3.3917	0	0	0		0.15	0.19
GCA_900012865.1_Clostridioides_difficile_VL_0199_Contig_ST1	100	100	99.7554	24.0795	0.214179	0	19.8012	0	0	3.70881	0	0	0		0.15	0.19
GCA_900012945.1_Clostridioides_difficile_VL_0211_Contig_ST1	100	100	100	24.0795	0.214179	0	20.0281	0	0	3.25383	0	0	0		0.15	0.19
GCA_900013005.1_Clostridioides_difficile_VL_0217_Contig_ST1	100	100	99.538	24.0795	0.214179	0	19.8012	0	0	0	0	0	0		0.15	0.19
GCA_900013095.1_Clostridioides_difficile_VL_0229_Contig_ST1	100	100	100	24.0728	0.431927	0	20.6492	0	0.183948	3.66745	0.579495	0	0.0562047		0.15	0.19
GCA_900013255.1_Clostridioides_difficile_VL_0396_Contig_ST1	100	100	100	23.4592	0.214179	0	19.8012	0	0	4.41197	0	0	0		0.15	0.19
GCA_900013345.1_Clostridioides_difficile_VL_0151_Contig_ST1	100	100	99.6399	24.0728	0.214179	0	19.8012	0	0	2.10947	0	0	0		0.15	0.19
GCA_900013395.1_Clostridioides_difficile_VL_0457_Contig_ST1	100	0.101269	0	24.1996	0.421218	0.292128	19.9093	0	0	0	0	0	0		0.15	0.19
GCA_900013645.1_Clostridioides_difficile_VL_0244_Contig_ST1	100	100	100	24.0795	0.214179	0	19.8012	0	0	3.84668	0	0	0		0.15	0.19
GCA_900013655.1_Clostridioides_difficile_VL_0245_Contig_ST1	100	100	100	24.1996	0.282002	0	19.9093	0	0	5.37709	0	0	0		0.15	0.19
GCA_900013665.1_Clostridioides_difficile_VL_0246_Contig_ST1	100	100	95.4545	24.0795	0.214179	0	19.8012	0	0	3.55715	0	0	0		0.15	0.19
GCA_900013685.1_Clostridioides_difficile_VL_0248_Contig_ST1	100	100	100	24.0728	0.214179	0	19.8012	0	0	3.33655	0	0	0		0.15	0.19
GCA_900013805.1_Clostridioides_difficile_VL_0274_Contig_ST1	100	100	100	24.333	0.417648	0.146064	20.1145	0	0.101656	4.27409	0	0	0		0.15	0.19
GCA_900013815.1_Clostridioides_difficile_VL_0277_Contig_ST1	100	100	100	24.0728	6.22189	0	20.2333	0	0.0919741	0	0	0	0.0562047		0.15	0.19
GCA_900013845.1_Clostridioides_difficile_VL_0286_Contig_ST1	100	100	97.2619	24.0795	0.214179	0	19.8066	0	0	0	0	0	0		0.15	0.19
GCA_900013895.1_Clostridioides_difficile_VL_0305_Contig_ST1	100	100	100	24.5864	56.8537	0	19.8012	0.36047	0	3.9432	0	0	0		0.15	0.19
GCA_900013955.1_Clostridioides_difficile_VL_0318_Contig_ST1	100	100	100	24.0795	0.214179	0	19.8012	0	0	3.87426	0	0	0		0.15	0.19
GCA_900014035.1_Clostridioides_difficile_VL_0329_Contig_ST1	100	99.8508	100	24.0862	0.214179	0	19.8012	0	0	0	0	0	0		0.15	0.19
GCA_900014055.1_Clostridioides_difficile_VL_0335_Contig_ST1	100	100	99.8166	24.0728	0.364104	0	20.2333	0	0.101656	3.52957	0	0	0.0562047		0.15	0.19
GCA_900014085.1_Clostridioides_difficile_VL_0340_Contig_ST1	100	100	100	24.0728	0.364104	0	20.2333	0	0.0919741	0	0	0	0.0562047		0.15	0.19
GCA_900014105.1_Clostridioides_difficile_VL_0344_Contig_ST1	100	99.7548	90.9159	24.1996	0.364104	0	20.4386	0.110914	0	2.42658	0	0	0.0562047		0.15	0.19
GCA_900014155.1_Clostridioides_difficile_VL_0316_Contig_ST1	100	100	100	24.0728	0.49975	0	20.2333	0	0.0919741	3.92941	0.282318	0	0.0562047		0.15	0.19
GCA_900014195.1_Clostridioides_difficile_VL_0451_Contig_ST1	100	100	80.9757	23.5259	0.356964	0.146064	19.8012	0	0.0919741	2.93672	0	0	0		0.15	0.19
GCA_900014245.1_Clostridioides_difficile_VL_0131_Contig_ST1	100	99.7868	99.7758	24.1996	0.353395	0	20.2387	0.105368	0.0919741	3.99835	0	0	0.0562047		0.15	0.19
GCA_900014295.1_Clostridioides_difficile_VL_0362_Contig_ST1	100	100	99.7078	24.0795	0.435497	0	20.1307	0	0.0919741	3.24004	0	0	0.0562047		0.15	0.19
GCA_900014415.1_Clostridioides_difficile_VL_0354_Contig_ST1	100	100	100	24.3263	0.364104	0	20.336	0.110914	0.101656	3.70881	0	0	0.112409		0.15	0.19
GCA_900014495.1_Clostridioides_difficile_VL_0381_Contig_ST1	100	99.9867	97.0444	24.1996	0.349825	0	19.9093	0	0	4.02592	0	0	0		0.15	0.19
GCA_900014535.1_Clostridioides_difficile_VL_0389_Contig_ST1	100	100	100	24.0862	0.214179	0	19.8012	0	0	3.36413	0	0	0		0.15	0.19
GCA_900014585.1_Clostridioides_difficile_VL_0400_Contig_ST1	100	100	100	24.333	0.431927	0.292128	20.7573	0	0.19363	0.799669	0.297177	0	0.0562047		0.15	0.19
GCA_900014635.1_Clostridioides_difficile_VL_0405_Contig_ST1	100	0.319795	0	24.0728	0.224888	0	19.8012	0	0.0919741	0.275748	0.297177	0	0		0.15	0.19
GCA_900014655.1_Clostridioides_difficile_VL_0414_Contig_ST1	100	100	100	24.1996	0.435497	0	20.552	0	0	3.6123	0	0	0.0562047		0.15	0.19
GCA_900014755.1_Clostridioides_difficile_VL_0460_Contig_ST1	100	100	100	24.0728	0.364104	0	20.1307	0	0.0919741	3.84668	0	0	0.0562047		0.15	0.19
GCA_900014765.1_Clostridioides_difficile_VL_0461_Contig_ST1	98.6389	100	35.2765	23.2391	0.356964	0	19.8012	0	0.0919741	0	0	0	0		0.15	0.19
GCA_900014895.1_Clostridioides_difficile_VL_0121_Contig_ST1	100	100	100	24.333	0.638966	0.146064	20.3414	0	0.19363	3.08838	0	0	0.0562047		0.15	0.19
GCA_900014945.1_Clostridioides_difficile_VL_0417_Contig_ST1	100	100	100	24.0928	0.364104	0	20.5466	0	0.275922	4.9221	0.579495	0	0.0562047		0.15	0.19
GCA_900015025.1_Clostridioides_difficile_VL_0075_Contig_ST1	100	100	100	21.965	0.214179	0	19.8012	0	0	2.41279	0	0	0		0.15	0.19
GCA_900015035.1_Clostridioides_difficile_VL_0124_Contig_ST1	100	100	100	22.3119	0.214179	0	19.8012	0	0	2.23356	0	0	0		0.15	0.19
GCA_900015075.1_Clostridioides_difficile_VL_0423_Contig_ST1	99.7108	100	100	24.0728	0.364104	0	20.2333	0.105368	0.0919741	3.52957	0	0	0.0562047		0.15	0.19
GCA_900015115.1_Clostridioides_difficile_VL_0249_Contig_ST1	100	100	100	24.0795	0.214179	0	19.9093	0	0	0	0	0	0		0.15	0.19
GCA_900015135.1_Clostridioides_difficile_VL_0317_Contig_ST1	99.9807	100	98.9876	24.0795	0.214179	0	19.8012	0	0	3.73638	0	0	0		0.15	0.19
GCA_900015145.1_Clostridioides_difficile_VL_0323_Contig_ST1	100	100	100	24.1996	0.349825	0	19.9093	0	0	2.79884	0	0	0		0.15	0.19
GCA_900015155.1_Clostridioides_difficile_VL_0374_Contig_ST1	99.9229	100	100	24.0862	0.214179	0	19.8012	0	0	3.08838	0	0	0		0.15	0.19
GCA_900015255.1_Clostridioides_difficile_VL_0207_Contig_ST1	100	100	100	24.2062	0.349825	0	19.9093	0	0	3.37791	0	0	0		0.15	0.19
GCA_900015325.1_Clostridioides_difficile_VL_0186_Contig_ST1	99.7108	100	86.5539	24.2062	0.431927	0	20.7519	0	0.0919741	4.45333	0.579495	0	0.0562047		0.15	0.19
GCA_900015335.1_Clostridioides_difficile_VL_0188_Contig_ST1	100	100	100	23.7927	0.217748	0	19.8012	0	0	3.11595	0	0	0		0.15	0.19
GCA_900015365.1_Clostridioides_difficile_VL_0379_Contig_ST1	100	100	96.5145	24.0728	0.214179	0	19.8012	0	0	2.59203	0	0	0		0.15	0.19
GCA_900015575.1_Clostridioides_difficile_VL_0021_Contig_ST1	100	100	100	24.1996	0.435497	0	20.5466	0	0	3.77775	0	0	0.0562047		0.15	0.19
GCA_900015585.1_Clostridioides_difficile_VL_0042_Contig_ST1	100	100	100	24.0795	0.214179	0	19.8012	0	0	2.39901	0	0	0		0.15	0.19
GCA_900015645.1_Clostridioides_difficile_VL_0257_Contig_ST1	100	100	100	23.2591	0.214179	0	19.8012	0	0.183948	3.90183	0	0	0.0562047		0.15	0.19
GCA_900016335.1_Clostridioides_difficile_VL_0385_Contig_ST1	100	100	100	24.0728	0.214179	0	19.8012	0	0	2.59203	0	0	0		0.15	0.19
GCA_900016345.1_Clostridioides_difficile_VL_0386_Contig_ST1	100	100	100	24.2062	0.349825	0	20.1145	0	0.0919741	4.35682	0.297177	0	0		0.15	0.19
GCA_900019305.1_Clostridioides_difficile_VL_0036_Contig_ST1	100	100	100	24.0862	0.364104	0	20.2333	0.105368	0.183948	3.22625	0.282318	0	0.0562047		0.15	0.19
SAMEA3467896_ST1	100	100	100	24.5864	2.2346	0.299815	21.2002	0.227374	0.847129	9.89935	0.579495	0.244746	0.118326		0.15	0.19
SAMEA3467897_ST1	100	100	100	24.5398	1.09588	0.292128	21.1246	0.216282	0.750315	8.63091	0.579495	0.244746	0.118326		0.15	0.19
SAMEA3467899_ST1	100	100	100	24.2329	0.90669	0.292128	21.1192	0.216282	0.759996	8.57576	0.579495	0.244746	0.112409		0.15	0.19
SAMEA3467900_ST1	100	100	100	24.1929	0.849575	0.292128	20.8113	0.216282	0.551844	7.65201	0	0.244746	0.112409		0.15	0.19
SAMEA3467901_ST1	100	100	100	24.6331	2.03113	0.307503	21.4108	0.227374	0.818085	9.91314	0.579495	0.329142	0.121284		0.15	0.19
SAMEA3467902_ST1	100	100	100	24.1929	0.90669	0.292128	21.1192	0.216282	0.643818	8.56197	0.579495	0.244746	0.112409		0.15	0.19
SAMEA3467903_ST1	100	100	100	24.1195	0.781752	0.292128	20.9625	0.216282	0.745474	8.54819	0.579495	0.244746	0.112409		0.15	0.19
SAMEA3467904_ST1	100	100	100	24.0928	0.90669	0.292128	21.1192	1.3587	0.9149	8.3138	0.579495	0.244746	0.112409		0.15	0.19
SAMEA3467906_ST1	100	2.31852	1.66463	24.1596	0.853145	0.292128	20.9625	0.216282	0.745474	1.06163	0.579495	0	0.112409		0.15	0.19
SAMEA3467933_ST1	100	100	100	24.4664	0.778182	0.292128	21.1192	0.216282	0.745474	4.13622	0.579495	0.244746	0.112409		0.15	0.19
SAMEA3467934_ST1	100	100	100	24.4597	0.878132	0.292128	21.1408	0.216282	0.745474	7.99669	0.579495	0.244746	0.112409		0.15	0.19
SAMN03473822_ST1	100	100	100	24.393	1.62419	0	20.6492	0.216282	0.377578	8.02427	0.297177	0	0.112409		0.15	0.19
SRR2047617_ST1	100	100	100	23.9995	2.81288	0	20.3576	0	0.367896	7.63822	0	0.244746	0		0.15	0.19
SRR4300546_ST1	100	100	100	24.4664	0.846006	0.292128	21.1192	0.216282	0.745474	5.17027	0.579495	0.244746	0.112409		0.15	0.19
SRR4300547_ST1	100	100	100	24.4731	0.813879	0.292128	20.9625	0.216282	0.745474	4.63257	0.579495	0.244746	0.112409		0.15	0.19
SRR593312_ST1	100	100	100	24.1195	2.37738	0.146064	20.2117	0.216282	0.275922	7.69337	0.297177	0.244746	0.0562047		0.15	0.19
SRR593320_ST1	100	100	100	24.2263	1.03877	0	20.2279	0.110914	0.45987	7.73473	0	0	0.0562047		0.15	0.19
SRR5945685_ST1	100	100	100	24.5131	0.838866	0.146064	20.9625	0.216282	0.745474	1.69585	0.282318	0.244746	1.02648		0.15	0.19
SRR5945686_ST1	100	100	100	24.5131	0.860284	0.292128	20.9679	0.216282	0.745474	1.06163	0.579495	0.244746	0.952522		0.15	0.19
SRR5945687_ST1	100	100	100	24.4664	0.792461	0.292128	20.9625	0.216282	0.745474	4.12243	0.297177	0.244746	0.943647		0.15	0.19
SRR5945688_ST1	100	100	100	24.4731	0.788891	0.292128	20.9679	0.216282	0.745474	1.06163	0.579495	0.244746	1.02648		0.15	0.19
SRR776481_ST1	100	0	0	23.8661	0.221318	0	19.812	0	0	0	0	0	0		0.15	0.19
GCA_900008755.1_Clostridioides_difficile_VL_0321_Contig_ST1	100	100	99.7554	24.1996	0.571143	0	20.7573	0	0.183948	3.92941	0.297177	0	0.0562047		0.13	0.19
GCA_900012885.1_Clostridioides_difficile_VL_0201_Contig_ST1	100	100	98.9605	24.0728	0.214179	0	19.8012	0	0	4.09486	0	0	0		0.13	0.19
GCA_900013735.1_Clostridioides_difficile_VL_0260_Contig_ST1	100	100	100	24.2062	0.353395	0	19.8012	0	0.0919741	2.9505	0.282318	0	0.0562047		0.13	0.19
GCA_900009715.1_Clostridioides_difficile_VL_0132_Contig_ST1	100	100	100	24.0795	0.214179	0	19.8012	0	0	0	0	0	0		0.15	0.15
