# Supplementary material for: A global to local genomics analysis of Clostridioides difficile ST1/RT027 identifies cryptic transmission events in a northern Arizona healthcare network
Source: Microb Genom. 2019 May 20;5(7):e000271. doi: 10.1099/mgen.0.000271 (PMC6700662; doi:10.1099/mgen.0.000271)
Supplement: Supplementary File 10 [file mgen-5-271-s0010.xlsx]

## Sheet: Sheet1
Table S10. Summary of GyrA and GyrB mutations in C. difficile
Mutation	%resistant mutation in ST1	%resistant mutation in non-ST1
GyrA Thr82Ile	0.950689	0.118712
GyrB Asp426Asn	0.00798258	0.0120724
GyrB Arg447Lys	0	0.00201
No mutation found:
GyrA: Thr82Val, Asp71Val, Ala118Thr, Val43Asp, Asp81Asn, Ala384Asp
GyrB: Asp426Val, Glu466Val, Arg377Gly, Ser416Ala
