# Supplementary material for: A global to local genomics analysis of Clostridioides difficile ST1/RT027 identifies cryptic transmission events in a northern Arizona healthcare network
Source: Microb Genom. 2019 May 20;5(7):e000271. doi: 10.1099/mgen.0.000271 (PMC6700662; doi:10.1099/mgen.0.000271)
Supplement: Supplementary File 11 [file mgen-5-271-s0011.xlsx]

## Sheet: Sheet1
Table S11. Results for antimicrobial resistance screening with Etests
24hr reading	Ciprofloxacin		Tetracycline		Vancomycin
	Replicate 1	Replicate 2	Replicate 1	Replicate 2	Replicate 1	Replicate 2
HS-FS-000082-I-02	MIC >32	MIC >32	MIC 32	MIC 32	MIC 4	MIC 4
HS-FS-000127-I-03	MIC >32	MIC >32	MIC .38	MIC .38	MIC 4	MIC 4
HS-FS-000151-I-02	MIC >32	MIC >32	MIC .38	MIC .38	MIC 3	MIC 3
HS-FS-000264-I-02	MIC >32	MIC >32	MIC .5	MIC .5	MIC 1.5	MIC 1.5
48hr reading	Ciprofloxacin		Tetracycline		Vancomycin
	Replicate 1	Replicate 2	Replicate 1	Replicate 2	Replicate 1	Replicate 2
HS-FS-000082-I-02	MIC >32	MIC >32	MIC 32	MIC 32	MIC 4	MIC 4
HS-FS-000127-I-03	MIC >32	MIC >32	MIC .38	MIC .38	MIC 4	MIC 4
HS-FS-000151-I-02	MIC >32	MIC >32	MIC .38	MIC .38	MIC 4	MIC 4
HS-FS-000264-I-02	MIC >32	MIC >32	MIC .5	MIC .38	MIC 1.5	MIC 1.5
