# Supplementary material for: A global to local genomics analysis of Clostridioides difficile ST1/RT027 identifies cryptic transmission events in a northern Arizona healthcare network
Source: Microb Genom. 2019 May 20;5(7):e000271. doi: 10.1099/mgen.0.000271 (PMC6700662; doi:10.1099/mgen.0.000271)
Supplement: Supplementary File 12 [file mgen-5-271-s0012.xlsx]

## Sheet: Table_S12_lsbsr_ST1_strict_core
Table S12. The strict core genome identified with LS-BSR for C. difficile ST1 genomes
SequenceID	Sequence
HS-FS-000016-I-01_76_91	ATGGCTCAAAATATAACTTTACAATTTGTTGAAGAAAAAGATTTAGAAAATCTTGAAAACGTAAAACTTCTATTTACTGAATATTCAAATTCTCTAAATATAGACTTATGTTTTCAAGACTTTAATAATGAATTAAAAACACTTCCAGGAAAATATAAAAAACCTTCAGGCTCATTGATATTGGCATTTGTTGATGAAAATTTGGCAGGTTGTGTTGCTTTAAAAAAACTTGAAGGTAAAATATGTGAATTAAAAAGATTATATGTAAGAAATCAATTTAGAGGATTAAAAATAGGAAAAATACTATTGGAAGAAATCATTGTAGAAGCTAAAAAAATTGGATATACACACATGAGATTAGATACTCTTCCAAGCATGAAAAGTGCACAAGGATTATAT…
HS-FS-000016-I-01_77_65	ATGTCAAAAAAAGTAATCGCAGATGTATTCTTAGAAGTAGCTAATGCAATAGAAAGCGGCGAATTTGGCAAAAAAGTAAAAATTGGTGTTACTACACTTGGAAGTGAACATGGTGTAGAAAACATGGTTAATGGTGCACAATTAGCAAAATCTAATTTATTTGATATTGTGCTTATTGGACCAAAAGTGGAAACTGACCTTGAAGTAGTTGAAGTTAATGATGAAAAAGAAATGCATGCAAAAATGGAAGAATTATTAGATTCAGGATATATTGATGCTTGTGTTACTATGCATTATAATTTTCCAATAGGTGTATCTACAGTAGGTAGAGTAATAACTCCAGCAAAAGGAAAAGAAATGATACTTGCAACAACAACAGGAACAAGTGCTACTAATAGA…
HS-FS-000016-I-01_66_250	ATGGAAGAAAATAAAGAGTTTTTATTGACACAAGAGGGATATGATAAATTAGAAGAAGAATTAGAAAACTTAAAGGTTGTAAAGAGAAAAGAAGTTGCAGAGAGAATAAAAGTTGCTATATCTTTTGGTGATTTATCTGAAAATGCTGAGTATGATGAAGCTAAAAAGGAACAAGCACAAGTTGAAGAAAGAATTTTAAAATTAGAAAATATGGTTAGAAAAGCTGTTATCATAGATGAAAGCAAAATAGACCTTAATGTTGTTACAATAGGATCAATAGTTAAAGTTAAGGATTTAGAATTTGATGAAGAGGTTGAATATACTATAGTTGGTTCGACAGAAGCAGACCCATATGATGGTAAAATATCAAACGAATCTCCTGTAGGGAAAGCACTTTTA…
HS-FS-000016-I-01_64_5	ATGACGCAATTTTTTCAAGTATTAGCAAGTGGTGCAGATAGTTTTATGAATTTATTTAGGGCAGGTGGGCAACAATTTGTAGGTTTTGTAACAGATATAGTACCACTTTTAGTAGCATTATTAGTTACAATGAATGCAATTATCAACTTTATTGGTACAGATAGAGTCGAGAGACTTGCAAAAAAATGTTCTGCAAATATATTTACTAGATATTTGATATTACCAGTCCTTGGTACATTTGTATTTGCAAACCCAATGACACTATCACTAGGAAGATTCTTGCCAGAAAAGTTTAAACCTAGTTACTTTGCAGCAGCAAGCTTTTCATGCCATACAATGAATGGATTATTCCCACATATCAATCCAGGTGAACTATTTATATATCTAGGAATTGCAAAT…
HS-FS-000264-I-02_75_187	ATGTCAGAAAAAATGTATACAGAAAAGGAATATTTAGAAGGAATTAGAGGAGCAACAGGAGAAAGAGCAGTATGGCTCTATCTTCTTATGAAAGAAGCTGAAAAATTAGGAGCTAATCCAGATGATATATGTAAAGAAGCAATATATGGATTTGGTAAAATGAGAGGTCAAAAATATAACGTAGCAGATACTCCAGGAAAAATGGCAGAAATGTTATATAACAGTAAAGGACAAAAAGTGTTTGAAATGGAATTAGTAGAAAATACAGATGAGAATGGCGTTTTAAAATTCCATCACTGTCCATTAGATGCTGCTTGGAAAGAATATGGATTAACTAAAGAAGAAAGAAAAGAAATTTGTAGATTAGCTTGTTATGGGGATTATGGAAGAGTTGACTGT…
HS-FS-000016-I-01_72_64	ATGGAGAATCAAGAAGCATTAAGACATGAAAAAATATGGATTTTATTATTTAGGTATTCGATACCGGCAATAATAGCAATGATGGTAACTTCACTTTATAATGTAGTAGATAGAGCTTTTATTGGTTCTATGGAAGGTATTGGCTCTATAGCTATTGCAGGTCTTGGTGTAACTATGCCAGTATTTACTCTAATAATAGCTTTTGGAATGTTGGTATCAGTAGGTGCTAGCACAAGATTGTCTATAAAATTAGGGGAAAGAAATAGAGAAGAAGCAGAGAAGATATTAGGTAATGCTTTGACATTATCTATAATTATCTCTTTAATTATAACTATATTAGGATTAGTTTTCTTAGAAGATATACTTTTTATTTTGGGTGCAAGTAAAGATTCAATATTT…
HS-FS-000016-I-01_63_225	ATGAGAACAGTGAAACAAGTTTCTGATTTAACTGGAATAAGTGTGAGGGCATTACATTATTATGATGAGATAGGTCTTTTAAAACCAAATAAAATTACAGATGCAGGATATAGACTTTATGATGATGAATCTATTAAAACTCTTCAACAAATTTTATTTTTTAAGGAGATTGATATTCCTTTAAGAGAGGTTAAGGAAATAATGTCAAGCCAATATTTTGATAAGGTTGAAGCTCTAAAAAATCAAAAAAAATTACTTATTTTAAAACGAAAGAGACTGGATGAATTGATAGAGCTTATAAATCAAACTCTAAGAGGAGAAGGAAATATTGATTTTAAAGAGTTTGATATGAGCGAGTATTTTAATGTTTTAGAAGAATTTAAAAGAGAACATAGGAAT…
HS-FS-000016-I-01_65_98	ATGTTAAAAATAGCATTGGAATCATTAGGATGCTCAAAAAATTTAGTAGATGCAGAAATAATGATGGGAATTTTAAATAACAAAGGCTATAAATTAATTGGAGATTTTGAAGAAGCTGATGTAATTATAGTAAATACATGTGGGTTTATAGAGTCAGCTAAACAAGAATCTATAGATACGATAATAAACTTTTCAGAGTTAAAAAAAACTGGCAATTTAAAGTTGTTGATAGTAACAGGGTGTCTAGCCCAAAGATATTCTGAAGAATTAAAAACTGAAATTCCTGAAATAGATGCTATAGTAGGAACAGGAAGCTATCAAAATATAGATAAAATACTTAAAGAATTAAGTGAAATGCATCAAATTGTAAGCCTTAATGATATAGAGTTTGTATTTAAT…
HS-FS-000016-I-01_63_348	ATGGATAGATTAGTTGGAACTGTTTCAAGAGGGGTTAGAGCACCTATTATAAGACAAGGAGATGACTTAGTTAAAATAGTTGTTGATTCTGTTTTAAATGCGTCAAAAAGTGAAAACTTTGAAGTTAGGGACAAAGATGTAATTGCCGTTACAGAAGCTGTTGTAGCTAGAGCACAGGGAAATTATGCTCACGTTGACAATATTGCAAAAGATGTAAAAGATAAATTTGGAGATGATACTGTTGGGGTTATATTCCCAATTTTAAGTAGAAATCGTTTTGCTATATGTTTAAAAGGAATTGCAAAAGGATGTAGAAAAGTCGTATTAATGTTAAGCTACCCTTCTGATGAAGTTGGAAATCACTTAATAAGTATTGATGAACTTGATGATAAGGGAATA…
HS-FS-000016-I-01_87_14	ATGACTAGAATATCCAATATAACAATAGCTGAACAATCTGAGTACTGTTTTTTGGCAATACGAAAAACAATTGACTTTATGGTAGAGTTTTCAGAGTTTTCAAAACAAAGTTTTGAAAAAATTTCTAAATATCTGGAGGAGAGAGGAATTTTATCTTCAGGAGCACCGATTGTATGTTTTCATAACATGGATTTAGCAAAATTGGATGTTGAAGTAGGGTTTCCTGTAGCCACTTATATAGATGGGAAAAATGAGATTCTACAAAGGATTGTTCCTGCACAGAAAATAATAACTGCAATTGATTTAGGACCTTATGAATTACAAGACCCTACTTTAGAAGACTTATTTTCATGGGCAAATAGCAATGGATATAAACTTCATGGCGATATATATTACCAG…
HS-FS-000016-I-01_67_176	ATGCTAAAAGATAAAACTGTTGTAATTGGCATAAGTGGCGGTATAGCTGCATATAAGGCTTGTGATGTTGTAAGTAAGTTAAAAAAACTAAATGCAAATATCCATGTTATAATGACAAAATCAGCAACAGAATTTGTTAAACCACTTGCATTTCAATCGCTGAGTCAAAATTATGTAGTAGAAGATATGTTTGAAGAACCAAAAACTTGGGAAGTTGAACATATATCATTAGCAAAAAAAGCAGATTTATTCTTAATAGTTCCAGCAAGTGCAAATGTTATAGGCAAGATTGCAAATGGTATAGCTGACGATATGTTGACAACTACTGTTATGGCAACCAAAGCACAGGTTCTTATAGCACCAGCTATGAATACTAATATGTATGAAAATCCAATTGTT…
HS-FS-000016-I-01_91_1	ATGAAAATAAGAATGTCATCTACTATAAGTTATGACAGCATAGTTGATGGACCAGGATTAAGAATGGTAATATGGACTCAAGGATGTATTCATAATTGTAAAGAGTGCCATAATCCTCAGACACATGATTTATGTGGAGGATTTTATATGGATACAGAAGAAATTATAAATAAAGTCAAATCATTGAAATTACAAAAAGGCATTACGCTATCAGGAGGAGAACCATTTTTACAACCAGAACCATTAGAAGAAATAGCAAGAGAAGCTAAAATAAATGGGTTAGATGTATGGTCATATACTGGATTTACGTTTGAACAACTGTTAGATAAAAAAAATAGAGCGTATTTTAAAAATTTAAATTTACTAAAGCAAATTGATATTTTAGTGGATGGAAAATTT…
HS-FS-000016-I-01_66_34	ATGAAATCGATAGACGAGCAAATGCGAATAATTATGAAAGGTGTAGATGATTTAATAGATGAGAAAGAGTTAAGGGAAAAGCTTATTAAATCAGAAAAAGAAGGAAAGCCTATGATAGTAAAATTGGGTCTAGACCCAAGTGCTCCAGATATACATTTAGGGCATACAGTAGTTCTTAGAAAGATGAAACAATTACAAGATTTAGGTCATCAAATAGTAATAATAATTGGAGATTTTACAGGAAAAATTGGAGACCCAACTGGAAAATCTAAAGCTAGAAAAGCTTTAACAACAGAGCAAGTTCTTGCAAATGCAAAAACTTATGAAGAACAAATTTTCAAAGTTTTAGATAAAGAAAAAACTATTGTAAGATTTAATAGCGAGTGGTTAGCCAAGTTA…
HS-FS-000016-I-01_63_443	ATGAGTATAATTGTTCAAAAATATGGTGGAAGTTCAGTAGCAGATACTGAAAAAATAAAATCAATAGCAGAAAATATAATAGAACGAAGAAAAGAAAATCCACAAATGGTAATAGTTGTGTCTGCCATGGGAAAATCCACTGATGAATATATAACTTTAGCAAAGGAATTGAGTAATGAACCTAGTAAGAGGGAATTAGATGCTTTAATGTCTACTGGTGAAATGATTTCAGCATCTTTATTATCAATAGCATTAAATGCACTTGGATGTAAAGCTATAAGTTATAATGCTTATCAGTTAAATATAAAAACGAGTGGTCTTCATGGAAAGTCTCAAATTGATGATATAAACGTAAACAGAATTAAAAATAGTTTAGATGAAGGAAATGTCGTGATAGTA…
HS-FS-000016-I-01_76_45	GTGAAGATAGCAATATTAGGGTATGGAACAGTAGGAAGTGGATTAATTGATTTAATAGAAAATAATACTTCAAAAAGAGATATAGAAGTTGTTGGAATTTTAGTTAAAAATAAAGAAAAACACAAGTATAAGAAGTATTTTGATAAGATAACTACTGATATAGAAGATATATTTGACAAGGATATTGATATACTAGTTGAAGTAATTGGAGGATTAAATCCAGCTTTTGATTATGTAACAAGAGCGTTAAATAAAAAAATACATGTAGTGACAGCTAATAAAGATTTACTGGCTGAAAAAGGTAGTGACCTTATAGAATTAGCTAACTTAAATAATGTTAGCATCAAGTTTGAAGCATCTGTGGCAGGTGGTATTCCAGTTTTAAAACCATTGATAGAA…
HS-FS-000016-I-01_65_80	ATGAATCATGAATTTATGGAAGCATTAGATGAATTAGTAGTTGACAGAGGTATAGATAAAGAAATACTTATAGATACTATAGAACAAGCTCTTTTAACTGCATACAAGAAAAACTTTGGTTCAGCACAAAATGTTAGAGTTGAATTTGATAGAGACAAGGGAGATATAAAAGTATTTTCTCAAAGAGTTGTTGTTGATGAATCAGATTTATATGATACTTTCTTAGAAATAGAGTTAGCGGATGCTAGAGAGATAAACCCTAATTATGAATTAGGTGATATTATAGAACATGAAGTTACACCTAAAAACTTTGGAAGAATTGCAGCTCAAACAGCAAAGCAAGTAGTTGTTCAAAGAATAAGGGAAGCTGAGAGAGAAATAGTGTATAATGAATTTATA…
HS-FS-000016-I-01_63_456	ATGGTTAAGAAAAGGTTAGTAGCTGTAGTATTGAGTTTAGCTATGATTAGTGTAGGGAATTTTTCATATGCTCACTCAGGAGGGCATAATTCATCAGGAGGTCATCATAATAAAAATAAATCAGAGTTAACACGTTATTATTGTGGAGGACATTCAGCACATCAACCAAATAAAGGTTTTTGTCCTTATGCTAGTACAAAAGAAAATTCTGGAGTAACAATATCTTCAGTACATAACGAAAAAAATCATAAAAACTATTTTGCAGAAAAAGGGTATAATAAAGGTTATGAAGATGGGTGTAAAGGGCTTTATAATTTAAGTGTCACAGAAGCCAAATCTGATAATTTATATGAAAAAGAGATTTTAAAAAGTTCATATGAAAAAGGATATTTAATTGGA…
HS-FS-000016-I-01_76_105	ATGAGAATGTATGATATTATAAAAAAAAAGAGAGATAACTTAGAGCTTAGTAAAAAAGAGATAAACTACTTTATAGAAAACTATTCAAAGGGAGATATACCTGACTATCAAGCTTCTGCACTATTAATGTCGATTTATTTAAATAAGATGAATAAACAGGAAACTGTACATCTTACAGAAGCAATGATGAACTCTGGAGACATGATAAACCTGTCTGAGGTAGATGGAATAAAGGTAGATAAGCATAGTACTGGTGGTGTTGGAGATAAGACTACCATAGCTCTTATACCTTTGGTTGCTTCATGTGGAGCACCAGTTGCAAAGATGTCAGGTAGAGGTCTTGGTCATACTGGTGGTACTATTGATAAATTGGAGTCTATACCAGGTTTTTCGACAGAA…
HS-FS-000016-I-01_75_45	TTGATTAAGACTTTAGATAGTAATATATTAAGAGAAGTAGGTACTTTATCTAGAGCAGTAAATTCAATAAATGATATTAAGTACAAGGAATTAAAGTTACAAAAAGGACAATTTACATTTTTGACAAGAATCTGTGAAAATCCTGGTATAAATCTTGTGGAATTATCAAATATGTTAAAGGTAGACAAGGCTACAACAACCAAGGCTATACAAAAACTAATAAAGGCAGGATATGTAGATAAAAAGCAGGATGAGTTTGATAAAAGAGGATATAATTTAACTCCAACTGATAAATCTTTGGAAGTTTATGAGTTGATAATTGAAGAAGAGAATAGAAGTATAGAGATATGTTTTGATAATTTTACAGATGAAGAAAAACAAGTGGTAACTAAGTTATTA…
HS-FS-000016-I-01_63_470	TTGATTATCAAATGTACCATAAATAATAAAGAAAAAGAATTAAGTATAAGACCAGATGATTTTTTAGCAGATACATTAAGAGAAAATGGATATGTAAGTGTTAAAAAAGGGTGTGATACAGGCTCATGTGGGTTATGTACAGTGATGGTAAATGACAAGGCCGTGCTTTCATGTAATTATCTTACTGCTAGAGTAGATGGTCAGCATATTACAACACTTGAGGGGGTCTTGGATGAAGCAAAGAAGTTTGGAGATTTTCTTGCAGACGAAGGGGCTGACCAGTGTGGATTTTGTGCTCCTGGATTTATAATGATGGTTTTGGCAATGAAAAGAGAGCTTCAAAATCCAACAGAAGAAGAAGTTATAGATTATGTAAATGGTAACCTTTGTAGATGTACA…
HS-FS-000016-I-01_65_155	GTGGATACTTTAGGAAAAAGAATTGCTTATTTGAGAAACTCCAAAAAACTTACTCAGCGCAAACTTATGGATATTTTAAAATTTGAAAACTTAGGCAAGTATGAAACAGGAGATAGAAAACCTAATTGTGATATACTAATGTCAATAGCTGATTATTTTAATGTTACGACTGACTGGCTTCTCTATGGTAAAGAGAAGGTAAATGTCAATAGTAGTGTAAAAGAAGATAAAGAAGATTACTTACATGTTACTAATGATGAAATGATGATATTAAATCTATACAGACAACTAAACGAACGTGATAAAATAAAAATAGAAGGAATACTTGAACTTAAGATATCTGAATATAAAGACTTAAAAAAGCATTCCTCTAATAATAATGAAGATAAAATGGTTTAA
HS-FS-000016-I-01_71_74	ATGAAGATAGGATTAGGCTGTGACCATGGAGGATATAATTTAAAAAAAGAAATAATAAGCTATTTAGAAAGTAAAGGTATAGAATGTGTAGATTATGGAACTAATAATGCTACAGATTCTGTTGATTATCCTGTTTATGGAGAAATAGTTGCAAATTCAGTTATAAATAAAGAAGTAGATTATGGAATATTATGTTGTGGTACAGGGATAGGAATATCTTTAGCTGCTAATAAGGTTCCTGGGATAAGATGTGCAGTTGTATCAGATGTATTTTCTGCAAAAATGTCAAAAGCACATAATGATGCAAATATGTTATCATTAGGCGAAAGAGTTTTAGGAAAAGGTCTAGCACTTGAGATAGTTGAAGCATGGATTAATACGGATTTTGAAGGTGATAGA…
HS-FS-000016-I-01_80_43	ATGCCAACAATTAACCAATTAGTTCGTAAAAGTAGAAAAGCGCTAGAGAAGAAATCTACTGCTCCAGCATTACAAAAAGGTTACAACTCTTTAAATAAGAAAGTAACTGACGCTAGTGCCCCACAAAAAAGAGGGGTTTGTACTTCAGTAAAAACAGTTACTCCTAAGAAGCCTAACTCAGCTTTAAGAAAAGTTGCCAGAGTTAGATTAACTAATGGTATAGAAGTTTCTGCTTATATACCAGGAGAAGGACACAACTTACAAGAGCATAGTGTTGTTCTTATAAGAGGAGGAAGAGTAAAAGACCTTCCAGGGGTTAGATACCATATACTAAGAGGTACTCTAGATACAGCAGGTGTTGATAAGAGAAGACAATCAAGATCTAAATACGGTGCGAAG…
HS-FS-000016-I-01_79_23	ATGAAAAAAGCTCTTAGATATCTTTTATTTTTAATCATTCTATTGCTTATATATTTTTTAGCCGTTAAATTAAATTATGATTTCTATACTCAATTTCACACTGGTTATATGCAAGACTTTAAAAGATACATTTTTATTAATTTAATTTCCTCTGGTGGTATTGGTTTGTTACTAGGAACTGAATTATTGATTAGAGAATACAAAAAGGATGGTAGTTGGTATATTGATATTCCAAGATTACTTCTTCTTTGTTTTCCATCTTTTTTACTATCACTGATGCCTGTATTCTTCTTTATGTTTCCAATTGGTAATATCCCAATTATAGGTAATTTTATTATGCTTGATAGAATCCCACTAAACATAATAATTTTTAACATCTTATTCGGATACTTCTTGATA…
HS-FS-000016-I-01_72_28	ATGAAAAATACTAAAGTAAATATTCAAGATTTAACTAAAATGTCAATATGTGTAGCATTATTGTGTATATCATCTTACATATATATACCATTGCCATTTACTCCAGCAGGAGTAACAGCACAAACAATAATGATAAATTTGATAGCTTTGATTTTAACACCAAGACAAGCATTTAGTACAGTTGGTGTATATATAATGATAGGTTTAATTGGGATTCCAGTATTTGGTGGAGGTACATCTGGTATTGGAAAGTTGTTAAGCCCAACAGGTGGTTTTTATTTTGGGTTTTTGTTTGCAGCACTAATTATTAGTTTATTAAAAGGACGAAATAATGATATTAAGAGATATATACTAATAACAATTTTTGTTGGAATGCCTATTATATATTTTATGGGAACA…
HS-FS-000016-I-01_64_126	ATGAAAGTGCTCATTTCTAACACATCAGATAAGCCATTATACCAACAAATTAAAGAGCAAATTAAAGAAGCAATATTTACTGAAGAACTGAAAGAAGGGGATGCAATGCCCTCAATAAGAAATTTTGCTAATGATTTAAAAGTTAGTATTTTGACTATTAGACGAGTGTATGAAGAACTTGAAAATGAAGGTTTTCTTACACGCCAAGTTGGAATAGGAACATTTGTTTCAACTGGAAATTTAGAAATACTAAGAGACTCAAAGAGGCGTATAGTTGAACAAAAAATGGCAGATATGATTAAGGATGCAAAAGCACTAGGAATTACACAGATAGAGTTACAAGAAATGATGGGTATTCTATATGAGGAGGATTAA
HS-FS-000016-I-01_82_3	ATGCTAACTCCATATTTAATATTTAATGGTACTTGTGAAAAAGCATTTAATTTTTATGCTGAGGCTTTCGGAGGAGGAAAAACTATATTTGCGCGATTAGACAGCAATCCAAACAATCCTATTATGCACGCAAGTGTTACTTTCACAAAATACGAAGGTTGTATAATGGGTGCGGATACAGACAAGCCTGTTGTAATTTCTGGCATGGCGATTTGTGTTGTTCTACCATCTCGAGAAGCGATAGAAGAAATATCTGTAAAACTTGCCGAGGGTGGTACACTTGTACAAGAATTTTTACCACACCCACCACCACATCAAAATGATGGCGCTGCTGAAGTACTTGATAGGTATGGGTATACTTGGTATTTAAGTACATAG
HS-FS-000016-I-01_65_130	ATGTATAAAGAAAAGTTGTTTGATAATTATTTTAAGTTCTTAGCACTATTATTTTGGCCAATTATGTGGTATAAGTGGATAGTAATTTCAAATGGTACTCTTGAAAATATGTTATTTACCATATATGCAATCGTCGCAATTATTTTCATCATTTTATATTCGGTGTTTATGATAAAATATAAAGACATTACACAAATAGATTTCTTTTACAGGATAAGTACTCTACTTGCTTTTATATTTACACTTTTTAGCTTTTTAATATACCCAAAGAGTTTATTTTTCTTGTATTTAAAGATTATTTTTACTGGAATATACCTTTATTATTCAATAGTAAAAACTCTTAAATTTAAAGATGATGAAGGTGTAGTGGGTATTATGAGCTCACTTTTATTAATTGTA…
HS-FS-000016-I-01_63_594	ATGAGTTTGGAAAAACTTATTAGACCAAAAAGTATTGCTATAGTAGGAGTGACTGATAAACTTGGTTTTGGAAGAAGTGCAGCACTTAGTATAGTAAAAAGTAAGGAAACAGATAGAGTATATTATGTTAATCCCAAAAGAGAAGAATTGTTTGGGAGAAAATGTTATAAGATGATACAAGAAGTTCCAGAAGTAGTAGACTGTGTAGTAGTATGTACGCCTAGAAATGTAGTTCCATCTGTATTAAAAGATTCTGGAGAGTTAGGAACAAAGGCAGCAGTGGTATATGCTAGTGGATTTGCAGAGGAAGGTACAGAGGAAGGTACAGATTTAGAAAATCAACTTATAGAAATATCAAATACATACGATATGAAAATATTGGGTCCAAACTGCATGGGG…
HS-FS-000016-I-01_67_139	GTGGGTATGTTAAAAAAATTATGTTCACTAGCTATGGTAGCAATTATGACTACAACACTTATAACAGGGTGTTCAAGTGGAAATGGAAAAGATTCAAAAAAGGATGGCGAAAAAGAAAAACTAGTTCTTTGGATGCCACCAGTAGAAAATAATATGAAGGAAGTTTGGGACCCTATTTTAGATAAATTTGAGGAAAAAAATAACTGTGAAGTAGATTTACAGATAATTCCTTGGGATAATTATTCTGAAAAATTTGCAACAGCTATAAGTGCTGGCGAAGGTCCAGATGTAGGATATATGTATGCAGAAATGTATCCACAGTTTATAGAAAGTGGAGCAGTAGAAGATTTGACTAACTATGCAACTAAAGAGGATAAAGAGCAATCTATTTATATAAAA…
HS-FS-000016-I-01_63_593	ATGATTTCAGCTAAAATGGAAAAATTACTTAATGAGCAGATTAACCATGAATTATATTCTGCGTATCTTTATCTTTCTATGTCTTCTTACCTTGAAGCAGAAGGACTTAAAGGATTTTCTAATTGGTTTTATGTTCAATATAAAGAAGAGACAGACCACGCTATGTTTTTTTACAAATACTTACATAATGTAGGAGGAAAGGTTCAGCTTGATGCTATCCCAATGCCAGATTCAGACTTTACTTCTGCAATGGATATTCTTGAGCGTACGTTAGCTCATGAAAAAAAGGTTACAGCTTTAATAAACAACTTAGCAGCTGTAGCAAACTCTGAATCAGACTTTAGAACTTCTCAATTCTTACTTTGGTTTATATCTGAACAAGCAGAAGAAGAAACAAAT…
HS-FS-000016-I-01_71_59	ATGATACCTTTTACTCAAGATGTAAGCATTTTTTATGCTACTATTTATGGTGGAATACTCATAGGGGTGTTGTTTGATTTTTATAGAGGGCTAAGAGGGAATTTTAAATTCATCAATTATTTTGCTATAATCTTTGATGTATTGTTTTGGTTTCTAGCTACGGTTATAATATTCGTAACAATAAACCTTACAGAATTTTTTGATTTAAGATATTATCATTTTGTGGCTTTGTTTATTGGTTTTATTTTATACTATAACACCATAAGTAAAATTGTTTTATCAATTATCAATAAAATAATTCGTTTTGTGAGAAATTCTTTTAAAAAAGTTACACATTACATAGTCAGTTTTTTAAATAATTTGTATTACGTTATAATCTATTCACTACACCTACTATTT…
HS-FS-000016-I-01_63_292	TTGAATAAAAAACTTGAAAATAGATGCTCATGGCAAGAATATTTTATGAGACTGTGCGAAACAGTAGCTGAAAGAGGAACTTGTGATAGAGCTTATGTAGGAGCTATAATTGTCAATTCAGAAAACAGAATAGTGTCTACTGGATATAATGGTAGTATTTCTGGAGATAAGCATTGTAGTGAAGTTGGTCATGAAATGAGAGATGGACATTGTATTAGAACCATTCACGCTGAACAAAATGCCCTTTATTATTGTGCAAAAGAAGGTATTTCAGTTAAAGATTGCTCTATTTATGTAACTCACTTTCCTTGCTTAAATTGTACTAAGGCTATAATTCAAGCTGGAATTAAACATATATATTATAGAACTGGATATAGAATAGATGAATATGCTATAAAA…
HS-FS-000016-I-01_66_181	ATGAAAGGATTTGAACGCAAAAATCAATTATTTTCTCTTTGCGGATTGAATTGCGGACTATGCCCTATGCTTTTGGGAAATTACTGTGGCGGTTGTGGCAATGGTAATCAATCATGCAGAATTGCAAAATGTAGTCTTGAACATGGACAGATTGAATATTGCTATGAATGCAAACAATATCCATGCGAAAAATATCAACACATTGATGATTATGATTCTTTCATCACGCATAAACGGCGAAAAGCAGATTTAGAAAGAGCAAAAAACATAGGCATTGAGCAATATAATCTTGAACAGCAGGAAAAAACACAAATTCTTTCTTACTTACTTTCTAACTATAATGACGGGCGTAGAAAGACTTTCTTTTGTGTGGCAGTCAATTTATTAGAACTTTCAGAA…
HS-FS-000016-I-01_72_78	ATGAGTGATGCACATTACGACATGCACAAGCGAAATGGATATTCAAGTGATGAGCCATATCCAGAGATAAAAGTTTTAGGTCTAAATAAGTATTATGCAGAATTATTGATGGATGACTATGCCGGAGTATCAAGTGAATTTACGAGTGTAAATCAATATCTATACCATAATTTTGATTTAGATGAAACGCATAGAGAGTTAAGTGAAATGTGGATAAATATATCTATAACAGAAATGTTACATATGGAGATATTAGCAAAGACTATAAGATTATTGGGTGGAAATCCTGTATATAGAGGTTCTACAAGTTCTTGTGGTGCATATTGGAATGGTGGTTTTGTATGTTATGGAAATTCTATTTGTAACAGATTAAAACTAGATTTGCATTTGGAGCATGTG…
HS-FS-000016-I-01_74_18	GTGAGTAAGCAGATGAGAGATATTTTTATAGTTGGTTTTGCTTTATTTTCTATGTTCTTTGGTGCAGGAAATCTTATGTTTCCTCCATTTTTAGGGATGGAATCCGGCAAAGACTGGTTAATTCCTCTTATTGGATTTGTTGTTGCAGATGCTGGTATAGCAATGCTTGTTATTATAGCAACAGCAAGATGCAAGGGAAGCATGGATGATGTACTTAGGAGAGCTGGTAAAGGGTTAGCAAGAGTAATGAGTGTAGCTGCTCTAGCATGTTTAGCACTTCTTGTAATACCAAGAACTTGTGCAACAACATATGAAATGGGTATTATGCCTATATTTGGAGACCATGGACCAGTAGCTAAAGCTATATTTTCAATAATCTTCTTTGGGTTAACTTTAGCA…
HS-FS-000016-I-01_63_131	ATGGAATTTCAACAAATAATAGCTATATGTATATTTTTAATAGTTATGGCAGCTATTATTACAGAAAAGGTAAACAGATCCGTAGCAGCTGTTGGTGGTGCACTATTAATGATAATATTCAATATACTTACACTTGATGAAGGATTAAGCCATATAGATTTCAATACTATTGGTGTATTAGTTGGTATGATGCTATTTGTAGCTGTTGTCAAAAACTCAGGGTTATTTGAATATATAGCTATCTGGACTGCAAAGAAAGCTAAAGGTGACCCATGGAAGATAATGATTTGTTTTGCTATTATAACAGCTATTTTATCAGCTGTATTAGATAATGTTACAACCGTCTTACTTATTGGACCAATGACTATAGTTATTACACAAATATTAGGACTTAATCCA…
HS-FS-000016-I-01_70_43	ATGGCTAAAATTGATAATATGATGTCCATATTATGGATGTTAAACTCAGACAAAAAAGTTACCGCAAAACAAATATCTGAAAAACTAGAAATAAATATAAGAACTGTCTACAGACACATTGATGCATTATCTGCTAGTGGAGTACCTATAATTTCAGATACAGGTCATAATGGTGGATATACACTTTTGAATAATTTCATCAAAGCACCTCTTTTTTTCGATACAGAAGAACAAACTGCGTTACTTCATGCAGCTATATTTGCTAAAGAAGAGGGAAGTTTCTTAGATGACACACTAGACAAAGCAACCTCAAAGTTAAAAATGTATTCAAATCAAAAACAAGAAGAAACTTTAACAAAACATTTAATAGGTTTTGAAGTAATAAAACCAACTGGAAAA…
HS-FS-000016-I-01_63_563	ATGATAAAACTTGCTACTTTTGCAGGTGGATGTTTTTGGTGTATGGTAAAACCTTTCGATAAGTATGATGGAGTTATTAAAGTAGTTTCTGGATATACAGGTGGTCATGTTGAAAACCCTACATATCAAGAGGTATGTTCAGGAACTACTGGTCATTTAGAAGCAATTCAAATAACATATGATGATGATATAATAAGTTATGATGAACTTCTAAATATCTTCTGGAAACAGATTAATCCTACAGATGATGGTGGACAATTTGGTGATAGGGGAACTCAATATAAGACTGCTATATTTTATCATGATGAAGAACAAAAAAATATAGCTTTAGAGTCAAGAGAACATCTGGAAAATAGTAAAATATTTGATAGTAAAATAGTGACTGATATAATTCCAGCA…
HS-FS-000016-I-01_63_244	ATGAAAAAAGTAATTAGTATAGGAGAAGCTTTAATAGACTTTATACCTAATCAAAATGGTTGTAAATTAAAAAATGTATCAGAATTTAGAAGAGTAGCAGGAGGAGCTCCAGCAAATGTTAGTGTTGTTGTAGCAAAGCTTGGAGGAAAATCAAGTTTTATATCTAAGTTAGGAAAAGATGCATTTGGTGATTATATAATAGATGTATTAAATGAAGTAAATGTAAATACTGATTATGTATTGAGAACAAGTAAAGCAAATACAGGACTTGCTTTTGTATCATTAAAAGAAGATGGTAATCGTGATTTCTCATTTTATAGAAATCCAAGTGCAGATATGCTTTTAGAAGCTGATGAGGTTAAAAAAGAGTGGTTTAATAATTGTCATATCTTACATTTT…
HS-FS-000016-I-01_66_233	ATGAAATTTATTGATTTACATTGTGATACTATAGCAAAATTAATGGAAAATGTAGAAACAAGTGAACTTAAGTCTAATAAATATTCTGTTGATATAGACAGATTGAAAAAGGGGGATTCATTAGCTCAAACATTTGCTCTTTTTGTTGATACTGAAGAAGTAAAACATCCTTTTGATTATTGCATGAGTATGGCAAATAAATTTCATGAGGAAATGAAAAAAAATAGTGATGAAATAGCTTTAGCTACTAACTATGAAGAAATTATGAAAAACCAATCAGAAGGTAAACTTACAGCTCTTTTATCTATTGAAGAAGGTGCAGTACTTGAAGGTAAATTAGAAAATTTAAAGAAATTTTACGACTTAGGGGTTAGAATGATGACAATAAGTTGGAATCAT…
HS-FS-000016-I-01_80_72	ATGTATTACTTATTAAACAAAAGCACAAATCCTTACTTTAATTTGGCATTAGAAGAATATCTATTTTTAAATGATAAATATAATGATGATATTATAATCATATGGAGAAATGAAGACTCCATTTTTATAGGTAAAAATCAAAATCCATATCAGGAAGTACATCATGATGTTATTGAAAAGGGAGAAATTCCTATTTTAAGAAGAATATCTGGAGGGGGCACTGTTTATCATGATTTAGGTAATATCAATATGTCATTCATACAAAAAGATAGGCAACTTCATGAGATAGATTTTTTGGAGCATACTAAGTTTATGCAAAAGATGCTTTCAACCTTAGGACTAGATGTATCTATAACTGAAAGAAAAGATTTATTTTTAAATGGGAAAAAAATTTCAGGC…
HS-FS-000016-I-01_63_515	ATGATAAGATATTACAAAACTATAGATTCAAAATTAGAGAAACTTAGTTTTTTTGAAGATGGCTGTTGGATAAATCTTGTTGAACCTAATCATAGTGAAATCAACGAAATTTCTAATTTATTAAATATAGATGTAGAAAGCATAGAATCTGCACTAGATGAAGAAGAACGCTCAAGAATAGATGTTGAAGACAATCATACTCTTATACTTATAGATATACCAGTAGACGAAAGTGACTCTAATTCTTCTCATTATACTACAATACCCTTAGGTATTATACTAACTGAAGAAGCTATTGTAACAGTTTGTGATGCACAGACTAAGATTTTAAATGACTTTATAGTTGGTCATATTAAAGATTTTTTTACGTTTAAAAAGACTCGCTTTTTGCTTCAAATT…
HS-FS-000016-I-01_65_87	ATGGTGATTATAAAATCTATAAAAGAAATAGCAAACATAAAAGAAAGTGTCATTACCATAGGAAATTTTGATGGTGTACACAAAGGACATCAAGTTCTTATAGGAAAAACAGTTGAATATGCAAAAAAAGAAAATATACAGAGTATTGTATTTACATTTGCAAATCATCCTGTAAATTACTTTAGACCAAACTCAACAAAAAATATTATAAGCAATGATGATAAAATAAAATTATTAGAAGATTTGGGAATAGATATAGTTGTAATCATACCATTTGATGAGTATATGACTAAAATACCTGCAAAGGATTTCGTAGATGAGATACTAGTAAAAAAATTAAAAGCTAAAAAGATAGTAATTGGACATGACTTTACATTTGCAAGGGCAAAAGAAGGCAAT…
HS-FS-000016-I-01_63_236	ATGACAATTCGTAGTCTTGAAATCTTTGTTAAGGTTGCTGAATGTGGTAAAATGAGTGAAGTAGCAAGAAATATGTATATTACCCAGTCATCAGTTAGCCAAGCTATTTCAGAAATAGAAAAAGAGTATGGTGTTAAGTTATTTGATAGAATTTCAAAAAAATTATATTTAACTGAGGCAGGGAAAAAACTTCTTGGATATGGGAGGCATCTTTTAGCTGTAAATGAAGAAATGAATGATTGTATGAAGCATTGTGCAAAAAATATCCGTATAAGAGTTGGGGCAACAGTAACTGTTGGTACATGTGTAATAAGCCCGATAATGTTAGAATTATACAAGGTAAATCCTCTTATAGAACCTGAAGTATTTGTAGAAGATACAAGACTGATTGCAAAAAAA…
HS-FS-000016-I-01_73_50	ATGTATAAATATAAATTTACTGTATTTACTCCGACGTATAACAGAGCTCATTTACTTGAAAATTTGTACAATGATTTAAAAGCTCAAACTTATGATTTCAATGATTTTGAATGGTTGATTGTTGATGATGGAAGTAGCGACAGTACTAAAGAGTTAGTTGAAAAATTTATATCAGAAAATAAATTAAATATAAGATATATATACAAAGAAAATGGAGGAAAACATACTGCAATAAATCTAGGTGTAAAAAATGCAGATGGAGAGCTATTTTTCATTGTAGATAGTGATGATGGTTTAATTAAAGATTCTCTTGAAATTGCTAATGATGAGTGGGATTCTTTAGAGAATAAAGAAGGATTTAGTGGAGTTGTTGGACTTTGTGTATATCCAAGTGGAGAT…
HS-FS-000016-I-01_63_26	ATGTTATATAATAACGCATTAGAGTTGATAGGAAACACACCTGTAGTAAGGCTGAATAATTTAGGCTGTACTAATGGGTGTTCTAACATATATGTAAAATTAGAAAAAGTAAATCCAGCAGGAAGTATAAAAGATAGAGCTGTTTATGAAATGTTAGAGGGCTTAGAGCAAAGAGGAGAATTAAAAAAGGGAGATGTACTAGTTGAAGCAACTAGTGGAAATACTGGTATTGCATTATCTATGATAGGAAAATTAAAAGGATATGAAGTAGTAATCGTAATGCCCGAAACAATGAGCGTTGAGAGAAGAGATTTAATGAAGGCTTATGGAGCAAATTTGGTGCTTACAGATGGTAAAGCTGGAATGGCAGGTTCCATAGAAAAAGCAAATGAACTTTTA…
HS-FS-000016-I-01_75_61	ATGTACATTACAAAGGTATTAAATAATTCGTTGCTACTTGCAAAGGATGATAATGATGAAGAAATAATATTGATGGGGAAAGGCATTGGCCATAATTATAAGGCCGGGTCTGAGTTAAATAAAAAAGATATAGAAAAGATTTTTGTTCTTCATGATGAAAATATAAAAAAGAGTATTATACAATTGGCAACAGAAATAGATGCAGAATATTTTGGTATAGCTCAAATGATAATTGCATATGGAATAGAAAAATATAACTTAAAACTTATGAACCATATATATTTGGCCTTAACTGACCACATTGCCTTTGCAGTGAGACGCTTTAAAGAAGGTATAATGATTGAAAATCACTATTTGTTCGAAATCAAGGAATTTAATCCAAAAGAGTATGATATAGGA…
HS-FS-000016-I-01_68_84	ATGAATGTTTATGAAAAAGGTAATGGAGTTATACTAGAAGGAGTAACAGATTTTGACCCAGTACATATATTTGAGTGTGGTCAATGTTTTAGATGGCACAAACAAGAAGATGGCTCATACACTGGAGTTGCAAGGGGGAGAATATTAAATGTCAAAAAAGAGAATGATAAAATATATTTAAATAATACGAATTTAAAGGAGTTTAACAGCATTTGGTATAATTACTTTGATTTAGGAACTGATTATACAGAAATAAAGAATAAGCTAAAAAATATGGATGAATATTTGAATAAGGCTACTGAATTTGGATGGGGAATAAGAATATTAAGACAAGATGGATGGGAAATGCTTATATCATTTATAATTTCCTCTAATAATAGAATTCCTATGATACAAAGA…
HS-FS-000016-I-01_63_585	ATGAAGAATAAAAAATTCATTGTTATAATACTGATAATATCAATTTTAATAGGTGTATTAGTGAAGGAATATTCATCTAGAGAGATAAAAAAGGATGATATAAATGTCAGTAAGTATATAAAATATGCTGATTTAGCAAGTAAAAATAATGCACAAGTTAACTGGAAGTATGTAGCTTCCATTGTTGCTGTGTTAAATAAAAATAACTTAAAAAACGTTAAGGATTCACAGATACAAGAAGTATCAGATTTATTTGTTAAGAATTTTTCTAAAAATAATAAAATAAATAAGTTAAGTGATATTTTGGATGAGTTAGAATTTAGTAATAGACAAAAAAGATTGGTTGATAATTATATAGACAATCTTAAGGATTATGGTATAAAACCAGAAAGATTGAAG…
HS-FS-000016-I-01_71_68	ATGGCAAAACAAGCTGTAGGTGGGCAAGCTGTTATTGAAGGTGTAATGATGCAGTCAAAAGACAAAAGAGCGGTAGCTGTTAGAAAAAGTGACGGAGAAATAGCACTAAAAGAAGATAGAATAAAAAGTTGGGTAAGAGATAAGAATATAGATAAGATACCTTTTGTTAGAGGTTCTTTTGTTATGATAGATACAATGATTCAAGGGATAAAAAGTTTAAACTTTTCTTCAGAGTTTTTTATGGAAGAAGCTGAAGAGGATAAATTTGATTTATTTATAAAGAAAATTTTTAAAGATAAGGCAAATGATATAATTATAATATTTTCATTGGTCATAGCAATGTTACTTTCTGCTGGATTATTCATTTTTATACCTACATTGGTAGGAGGAGCTTTTTCT…
HS-FS-000016-I-01_67_78	ATGAATAAGAAAAAAATCACATTTATTTTTGTGATATTGATTTTAGCATTAATTTTATTTTCATTTTTTAGGAGTTCAAGCCAGAATACTAAATATAGTAAAACTAGCTACTACCTTGGTACAGTAAACGAAGTTACTATATTTAATGTAAAAGAATCCAAAAGTGATAAAATCTTAAATGAATGTGATTCAATTTTAAGATATATTGACAACAAAATGAGCACTCATATACCAGGAAGTGATGTTTCTAAAATAAATGATAATGCTGGTAAAAAATTTGTCAGAGTTTCTGATGATACATTTTTCGTCGTAAAAGAAGCTATACAATATTCCAAATTATCAGATGGATATTTTGACATAACAATTGGTCCATTATCAAATTTATGGGCTATTGGAACA…
HS-FS-000016-I-01_84_54	ATGGAAGCTATTTTATCTAAAATGAAAGAAGTAGTTGAAAATCCAAATGCGGCTGTAAAAAAATATAAAAATGAAACTGGTAAAAAAGCTATAGGTTGTTTCCCAGTTTATTGCCCAGAAGAAATTATACATGCAGCTGGAATGCTTCCAGTTGGTATATGGGGAGGACAAACAGAATTAGATTTAGCTAAACAATATTTCCCTGCATTTGCATGTTCAATAATGCAATCATGTTTAGAATATGGATTAAAAGGTGCTTATGATGAATTATCTGGAGTTATTATACCAGGTATGTGTGATACACTAATTTGTTTAGGACAAAACTGGAAATCAGCAGTACCTCATATAAAATATATATCATTAGTACACCCACAAAATAGAAAACTTGAAGCTGGTGTA…
HS-FS-000016-I-01_81_46	ATGAAATTAGCTGTAATAGGTAGTGGAACTATGGGAAGTGGTATTGTACAAACTTTTGCAAGTTGTGGACATGATGTATGTTTAAAGAGTAGAACTCAAGGTGCTATAGATAAATGTTTAGCTTTATTAGATAAAAATTTAACTAAGTTAGTTACTAAGGGAAAAATGGATGAAGCTACAAAAGCAGAAATATTAAGTCATGTTAGTTCAACTACTAATTATGAAGATTTAAAAGATATGGATTTAATAATAGAAGCATCTGTAGAAGACATGAATATAAAGAAAGATGTTTTCAAGTTACTAGATGAATTATGTAAAGAAGATACTATCTTGGCAACAAATACTTCATCATTATCTATAACAGAAATAGCTTCTTCTACTAAGAGACCAGATAAAGTT…
HS-FS-000016-I-01_76_90	ATGAATAAAAAAGATACTATGCACTTAATTTTTATAATTGTAATTTTTATTTTATTATGGTATATTGTGGTAGCAGTAAGTGAGATTAATAAAAATATTGAAAGTTGTAGTAACAAATTAGATTATTTGTCACAAGAGCTTATGAGTACTAAGTCGGATATTAGTAATACTATAAATGAAGAAATGTCAAAAAGTTATATAACAAAAAGTATTGACTTAAAAGTAAAAAAAATCGAGAAAAAAGAATGTACTATTGATGTAGATGTTCAATTAAGTAAACTTGGAAAAAATGGAAAAGTATTTTTTATGTATAAAGAAGATAGTGATAAATGGAATGAAACTGAGATGACAAAACATGGGGAATTATCATATGCATGTGAAATAAAGATAAATACAGGA…
HS-FS-000016-I-01_66_24	ATGCTTGTAAAAGAAATTAAATTACTAAGAAATATAATCAAAGATTGGAGAAAACATGGCTATTCTATAGGGCTTGTTACAACAATGGGATTTTTACATGAAGGACACCAAAGTCTTATAAAAAAAGCTGTAAAAGAAAATGATAAAGTAGTAGTGAGTGTATTTGTAAATCCAACTCAATTTGGACCAAATGAAGATTTTAATAGCTATCCAAGAGATATAGATAAAGATTTTAAATATTGTATGGATAGTGGAGCAACAGTAGTCTTTAACCCATCACCAGAAGAAATGTATTTAAAAGGTAATTGTACTACCATTAATGTTTCTGGACTTACAGATTTTCTTTGTGGAGCTAAAAGACCTGTTCATTTTGGAGGTGTCTGCCTAGTTGTTTCAAAG…
HS-FS-000016-I-01_79_56	ATGAAACAGACCAATACAAGTATAAGGCTTCTTACTAAAATTTCAGATTATATAAAGTTAATGAGAATAAAGCAATATATAAAGAATTTCTTTGTATTTTCAGCTATAATTTTTTCAAACAACATACTAAATATAAATTTATTTTTAAATACGTTTATTGCGTTTGTGTGTTTTTGCCTAATGTCATCATCAGTATATGCACTGAATGATGCTATAGACATGGATAAAGATAAAAAACATCCTAAAAAATGTAATAGACCAGTGGCAAGTGGAAGAATAAGCAAAAAAAGTGCTAATATACTATTTGTAGTATTAGCTTTAATTTCAGTCTGTTTATCAACAGTTGTTAGTTTTAATCTTTCTATAATTCTTAGTCTCTATTTGATAAACAATATATTA…
HS-FS-000016-I-01_67_99	GTGACAGAAAAACAAAGGCTCATTATAAATATTGCACAAAAAATTTTTGACCAAAAAGGTTTTCAAAATACTTCAATATCGGATGTTGTAAAAGAGTGTAAAATGTCTAAAGCTACTTTTTACAAGCATTTTGAAACTAAGGAAAGTTTTATCTGCGAAATAATCAATTATTATGATGAAAAGTTTTTAGAAATTATACATTCCATAAACGAAAATAATGACATTCCATCATCAGAAAAGTTAAACAGAAAGATAATTGCTGTATGGAAAAATATTTTTTCTAGAACTACCATAAATACCTATATAAGAGAAAATTTTTCTGAAGAGCAACGTAAGGCTACAAGTAAATTGCAAACAAAATCACGAGCTAACTTATTGAATGAATACAAATTAAGCTTA…
HS-FS-000016-I-01_64_144	ATGATTGAGAGTATACCAGCAAAACAAATTTTACAAAAAGTGAAATTTGACAATACAAGATGGTTTGGAATTGACTATAATATGAATCTCTATCGTGGTTGTTCTCATGGATGTATATATTGTGATAGCCGTAGCACAATATACAACATAGAGAATTTTGACAAAGTTAGATATAAAGAAAATGTGATAGAGATTTTAAGTAAAGAATTGCGTTCAAAAAGAAAAAAAGGGGTAGTAGGCATTGGAGCTATGTCTGACACATATAATCCTTTTGAAAAGCAACTTTGTATTACAAAGCAAGCACTAGATTTGATTTCGGAAAATCATTTTGGAGTGTCTATTGATACTAAAAGTAGTTTGGTGGTTAGAGATATACCGATTTTGCAGAAAATTAAAAAA…
HS-FS-000016-I-01_70_17	ATGGAAAGAAAATATCCAAATCTATGTAAGCCAATTAAAATTGGAAATGTAACATTCAAAAACAGAATGTTTTCAGCACCTATGGGGGGAACAGACATAACAGCAGATTGTACAATTGGCTCAAAATCAACAGCCTTTTACGAATTAAGAGCAAAAGGTGGAGCAGGTGCAGTTACAATTAGTGAATGTATGGTTCATCCAGAAACAGATGGTTCACATGCATATCATCTAGACTTAAAAATAGTTGATTCCTTAGCAAGTTTTACTTATACAGCAGATGCAATTCGCCGTCATGGAGCAATACCAAGTGTAGAACTATCTCATTCAGGACAATATTCAGGAACTTATTTAGTTGACAAAGATAAGAAGCGAGGATTATCACAATGGGGAGTAAGTCCT…
HS-FS-000016-I-01_63_7	ATGGATTATACTAAAACTTATGAAGAGTGGATAAAGGGTTCATATTTTGATGAAGATACAAAGCTAGAGTTGGAGAATATAAAAAATAATGAAAAAGAAATAGAGGATAGATTCTATAAGGATTTAGAATTTGGGACTGCGGGTCTTAGAGGAATAATTGAAGCAGGAACGAATAGAATAAATAAGTACACAGTTAGAAGAGCTACTTTTGGATTGGCAAACTATATATTAGAAAACACAACAAAAGAAGAAACAAGTAGAGGAGTAGTAATAGCTCATGATAATAGACACAAGTCTAGACAATTCTGTATAGAATCTGCAAATACTTTGGCAGCATGTGGTATAAAAGCATATATATTTGATAGTTTGAGAACTACTCCAGAATTATCTTTTGCTGTT…
HS-FS-000016-I-01_72_95	ATGAAAAAGATATATGGAGAAAAAATAAAAGCAGTAGTATTCGATTGGGCTGGAACAACAGTAGATTATGGATGTTTTGCACCTCTTAATGTATTTATAGAGATATTTAAAAGAAGAGGTATAGATGTAACAATGGAAGAAGCAAGAAAACCTATGGGAAAATTAAAAATAGACCATATAAGAGAAATGTGTGAAATGGATAGAATAAAAAATCTTTGGTCAGATAAGTTTGGTAAAGTGCCAACTGAAGATGATGTAAATGAACTTTATGCTGAATTTGAGCCAATGTTATTTGAGACATTAGAAGAGTATACGACTCCAATTCCTCATGTTGTTGAAACTATTGAAAAGTTGAGAAAAAATGGATTAAAAATAGGTTCTACAACGGGTTATACAAGA…
HS-FS-000016-I-01_76_71	ATGAAAAATCTGTGTAAAATATCAGATGATTATTTAAACAGCAAGCTTAAGTATTTAAAGTTATTATCAAAACAATATCCAAGTATATCAAAAGCAAGTACAGAAATAATAAATTTAGAGGCTATATTAAATCTTCCAAAGGGAACAGAGCATTTTATAACAGATGTACATGGTGAATATGAACCATTTGTACATGTATTAAAAAATGGTTCTGGTGTAATAAAGAGAAAAATAGAAGAATTGTTTTCAAATACAATAAGAGACAGCGAAAAAAAAATGTTAGCAACTCTTGTATATTATCCTGAACAAAAGTTAGACCTAATAATTAAGCAAGAGGAAAATATAGATGATTTTTATAGAATAAATATTTATAGACTTATAGAACTTTGTAAATATGCT…
HS-FS-000016-I-01_91_2	TTGGTTGAATTCGTAAAAAAAAGAGATGGAAGAGTAATTCCATTTAATGAAGATAGAATAACAAGAGCTATATTTTTAGCAGCAACGAATGTTGCAGAAAGAGAAGGAATAGTACCTGATTATAAATTATCTGAGCAATTAACTCAAGAAGTAATAAAGTTTTTAAATCATAAATACTCAGAATCAGTTCCAAGTGTTGAAGATATACAAGATTCTGTAGTTAAGGTTCTTATAGAAACTGGCCATGCAAAAACTAGTGAAGAATATATAATATACAGAACTGAAAGAAGTAGAATAAGAAATTCAAAAACAAGATTGATGAAGGCAATAGAGGAAATTACCTTTGAAGATGCAGAAGATGCTGATATAAAAAGAGAAAATGCAAATATTAATGGTAAT…
HS-FS-000016-I-01_67_183	ATGTTGTTAGTAAAAGTAGAGAATTTAAAGAAATATTATGCAGATAAATTAATTTTGGATATAGATAAACTTGAAATATTAGAAAATGACAAAATAGGTCTAGTTGGTTCAAATGGTCAAGGAAAAACAACATTATTAAAAGCAATATTGGGTGAAATAGAAATTGATGAAGGATATACTTACCTTACAGAAAGCTATTCTTATATAAGTCAGAGTGAAAATAATATTGAAACATGTAGTCATAGTAAGGAGAAGAGTCTTTTAAATGCTCCAGATAAATTTGAAGAATACTTATCAGGAGGGGAAAAGGTTAAGTTAAAAATAGCAGATGCGCTGAGTAATAAGAAAAATATCATAATAGCTGATGAGCCAACTTCAAACTTAGATAAAAAAAGCATT…
HS-FS-000016-I-01_76_109	ATGTCAAAAAAGAAGACTCCATTTTTGAAAAAAGTGGGAAAGAGAAGCTGGTGTATATTTACTATAATTTTAATAATTTATAGTGTTTTAATTTATAGGCTAGTTGATATACAAGTATTAAAAGGTGATAAATACAAACAAAGTGTTGAATCACAAAGCGTTGAGAAAGTCGAGTTAAATAGTGGAAGAGGAATAATCTATGATAGAAACAACAAGAAGCTTACAGATACAAGTAAATCTCAGGTATTAATTGTTGAAAAAGAAAAATTAAATAATAACTATAAAATTTTGGAACTTATTAAGAAAGCTACTAAGATGAATGATTTAGATATATATAAAGCTGTACAAGAGCAATTGACACGCCCTATAATACAGATTCAGACTAAAAATATCGATAAG…
HS-FS-000016-I-01_63_511	ATGTATTATTCAAGTACGAGAGGCACCGAAGAAAAAGTAACTGCATCACAAGCAATAATAAAAGGAATATCAAGTGATGGTGGTCTTTATGTTCCAAGTGAATTTCCCAATGTAAAAAATGAACTTATAAATTTAGTAAATTTAACGTATTCTCAGATAGCATTTTTTGTACTTAGTAAATTTTTATGTGATTTTACTGAAGATGAAATTAAAAATTGTATAGAAAATGCATATGATGAAAAGTTTGATTGTAGTAGTATAGCTCCATTAAATAAAGTAAATGATACTTATTTCTTAGAACTATATCACGGTCCAACTTTAGCATTTAAAGATATGGCACTTACTATAATGCCTCATCTTCTTAAAACATCTATAAAGAAAGATAATTTAGAGAAAGAT…
HS-FS-000016-I-01_63_658	ATGAATGAATCATATTGGTTTTTAAACTCAAGTCCAAAAGAATATAACAAATTAGGTGAAAATATAAAAACAGATTGTCTTATAGTAGGTGGTGGAATAACTGGATTGACAACTGCATATTTATTAGCAAAAGAAGGTAAAAAAGTAGTGCTTGTTGAGGCTGATAAAATAGGATATGGAACTTCTGGAAGGAATACTGGTAAGGTAACTTGTCAGCATGATATATTTTACTCTAAGATAGAGAAAAAATATGGATTAGATAAAGCAAAATCATATTATAATGCAAATAATGAAGCTTTAAATTTAGTTGAACAAATAATAGAAGAAAACAATATAAAATGTGATTTTAAAAGGGAAACTTCTTTTGTATTTACAGAAAAAGAGGATACTATAAAGAAT…
HS-FS-000016-I-01_63_109	ATGGATTTTTTTAAAAAAGGTATAAGTGGGTTTACTATTAAGATTTTAGCATTAATATTTATGACATTTGACCATATAGCAGCATTTATGCCACAAACAATGCAAATACCAATTTGGTTTCATTGGGTAGGCAGAATATCAGCACCACTGTTTATATTCATGGCTGTTGAAGGATTTTATCACACTAGTAACAGAAAAAAATATATAAGTAGATTGTATATTTGGTCTGTTATTATGGCTATAGGAAATCAAATAATTAATAATGTATTTTCACATCCAGAAGGAGCTATAATTATAAATAACATTTTTTCAACATTATTTTTAATAGCGATTTATTTACAAGCAATAGAGTTCATAAAGAAATTTAGAAAAGAGAAAGAAATTAAATATTTTATTATA…
HS-FS-000016-I-01_72_102	ATGAGCAAGGAAAATAAAAATGTAAGAATTGCTGTTGTCCAGGCGTCACCAGTCATAATGGATTTAGAAAAAACTGTTGAAAAAGCATTAGGATTAATTAAAGAAGCTGGTAGAAAAGGGGCAAATATCGTAGTTTTCCCTGAAGCATTCATACCTGCATATCCAAGAGGTCTTTCATTTGGATTTGTTGTTGGAAGTAGAACAATGGAAGGTAGAGAAGATTGGAAAAGATACTATGATAATTCTGTACCAGTTCCTAGTGCTACAACAGATTTATTAGGAAAAGCAGCACAAGAAGCAGGAGTATATCTATCAATGGGTATAACAGAAAGAGATGGTAATGATATAAATTGTACCCTTTATTGCACAAACTTATTTTTCTCTCCAGAAGGTAAGCTA…
HS-FS-000016-I-01_66_236	ATGGAATTAATTAAAGATGTAATTAAAGTTGACAATAGAATAGACTTTGGAAAATTTCAAACATTCATTGAAGCGGAGGCAGTTGTACCAGACAAAAAATTAGATGTATATGAAATTGTAAAAACAGAAGGATACATATCACTTAAAAAAATTGAAATGGCAGATGGGAAGATACTTTGCAGAGGTAGTTTTAATTATAATGTAATCTATATTGCAGATGATAAAAATACTATTTCTAATGTAGACGGAAAAGTAGATATAAACGAAGTAATAGAAAAAGACAATGTTGTTCAAGATATGGAATACATGTTATTTTCAGAAGTAGAGCATATGGATTGTACTATAATGAATGAGAGAAAGATTAAAGTAGGAGCTCTTATGAATATAAGGGGAAGTTTG…
HS-FS-000016-I-01_77_79	ATGAGTAGTTCTAATCAATCGACAATAAAGACATCTATACAGCGAGTAGGGAAATTTTTAAGTGGTATGGTAATGCCAAATATAGGAGCTTTTATAGCATGGGGTCTTATAACAGCATTATTTATACCAACAGGATGGATGCCTAATGAAAAATTGAGTACTATAGGCGACCCAATGATAAAATACCTTTTACCACTATTGATAGCTTATACTGGTGGTAAAGCAATAGCAGGACAAAGAGGTGGCGTAATAGGTGCAGCAGCAGCTATGGGAGTAATTGTTGGTGCAGATATACCAATGTTTATCGGAGCAATGATAATGGGACCATTTGCAGGATGGGTAATTAAGAAGTTTGATAAATTTGTAGATGGAAAGATACCAACAGGATTTGAAATGTTA…
HS-FS-000016-I-01_63_360	ATGGAAAGACTCGCTAGAAGGGAACAACCTCATATAAAATTTGGAATGTTTAAGATAAGAATTCCATTTATACATTACAGATTTGAGAAACCAGAAGCTATTCAAGGTATAATATCAAGTATGACAAGTTTAGGCACAATTGGCCTTAGTACACAAATTTTGGGATTACCCTATGAAGTGGCATGGAGTATGGCTATTATTAACTCAATATTATACTGTTTGCATGTTTTTATGGGAGACCCAGTTGTACCTGGCTGGATTACAGCTTCTATAACTCTTACAACTGCATATTTGTTAAAGTTCAGCATGGGCATTGAAAGAATACAAGCATTAACAGCTTTACAAATAGATTTAGGAATAATATTTATTTTAATGGGTATAACTGGTGTAGCTGGAAAG…
HS-FS-000016-I-01_75_93	ATGCTAGTAGTAGAAAATGTGAGTCATGGATTTGGTGCGAGAACAATATTAGAAAATGTATCCTTTAGACTTAGAAAAGGTGAACATATTGCACTAGTTGGTGCTAATGGAGAAGGAAAATCGAGTTTTTTAAATATAATAACAAAGAAGCTTATGCCAGATGCTGGAAATATAAAATGGTCTTCAAGAGCTACAGTAGGTTACTTAGACCAACATACGGTATTAAGCAAGGAAAAAACTATAAGAGAAGTGCTTAGAGAGGCTTTTAAGCATATGTTTGACTTAGAGCAAGAAATGATTGCTATGTATGACAAAATGGGAGAAGCTAGTGATGATGAAATGAGTAAGCTTCTTGAAGAAACAGCAGAGATACAAACTATACTTGAAAATAGTGGTTTT…
HS-FS-000016-I-01_64_224	ATGAAAGAGGTATTGGTATTACGAGATTTGGAGTGCATAAAGGCTATTGCGCATCCACGTAGAATAGATATTCTAAAAGCATTTGACAAATCGCCATTGTCAGCAAAACAATTATCTCAATTATTGGAAGAACCTCATGCAAAAATAAACTACCATATAAAAATGTTATACAAAGTTGGTATTTTAGAATTAGTTGAGGAAAAAATAAAGTCGGGGATTGTGGAAAAGTACTATTATCCAAGTGCAAAAAATGTGGTTATAGGGAATAGGATACTTAATTTTTCTTTAGACAATGGGGAAGAAAAAGAAGAATTGTACATATCAAAATTTGAAAATATGAGTGAAGTTTTTTATAAGGCAGCAGAGGAAGATGTTTTAGAAAATGAAAATATAGTTGAT…
HS-FS-000016-I-01_82_53	ATGAAAAATAAGAAAATAATGTTAGTGTTAAGTATATTATCTATATCTATATTCGCAGTTGGTTGTACTAATGCTCAAAATGGAAGTGATACATCTAAAAAAGAAACTAAGAGCAATACAAATGTTGAACAACCAAAAGAAGAAAACAATACTGAAAAAGAGGTTCCTAATAACAAAGCTAAACCTACTCCAAAAGAAGAAACTAAAACTCAATCAGCTACTATTTACTCTTTTGATGTAGATAAGACAGATTTAATTGAAAATAAAGTTGATTTAAATAAAATTGATGAGAACACTTTATTTGAAGAACTTCAAAAACTTAAAGTTGTTCCAGAATCTGCAAAATTAAATTCATTTACTACAAAAGACATTGATGGTGTAAAAACTGGTATATTAGAT…
HS-FS-000016-I-01_77_67	ATGTATAAAAAACATAAATTTATAAAAAATATAAAAAAAGCCTGGTATAAAATCAAATTAATTGATAGATGCCTTATAATTGTAATGGCAATATTAATGTTTCAATCTATATATAATTTATTTGTTAATGAAGTAAATTCACAAGATACTACAACTATTGATGTAGTAGTAAGAACCACTTCAGCAGCTATATTTGGGTATTTTTTAAGTGCTAATTTTATAAAGAGACCTTTAAGGAAGTATACAAATACTGATGTATCTTCAAATCTTTTTATAGATAATAATTTACCCCCAAAAGGTCAAGAGTCTAGTCAAAATAATATAATGAATGTCAAAAATACCATTGGATTTACTTCAGAAGCTGATAATTATGAAAAGAAAATACCTATTAATAATAAT…
HS-FS-000016-I-01_71_145	ATGGAATACATAAAGAATCCTATGAAAATAGAAGAAAAAAGTTTTGAATTGATACAAGAAATAATAGACGAAATTAGACCAGATTATAAATTTAAGAATAATATTGAAGAAAAAATAATAAAAAGAGCTATACATACTACTGCTGATTTTGATTACTTAGATATATTAAAAATATCAGAAGAAGCAGTTGATAGTATAATAGATGCATTAAAAAATAATGCAAGTATTTATACTGATACAAATATGGCTCTTAGTGGTATAAATAAAAGAAAGTTAGAATCATTAGGATGTAAGTATAAATGTTTAGTGGCAGATGATGAAACTGTAAAATTAGCTAAAGAAAAAGGAATTACTCGTTCTATGGCAGCAGTAGAAATTGCAGCTAAAGAAGAAGGAAGA…
HS-FS-000016-I-01_75_87	ATGAGCAATTACAGGACATTACATGAATTTGGAACAGATGAAATAACTATTGAAAAGTCTGTTTTTATTGGATATGCTAAGCCTATAAAGAGTGAAGAAGAAGCATTAGAGTTTATAAATGAAATAAAGAAAAAGCATAAAGATGCAACTCACAATGTGTGGGCTTATACTGTAGGTAAAAATATGAATATACAAAGATATAGTGATGATGGAGAACCACAAGGAACAGCTGGAATACCTACATTAGAGGTTATAAAAAAAGAAGATTTGAGAGATGTAGTGGTTGTTGTTACTAGGTATTTTGGAGGAACAAAATTAGGTGCAGGCGGTCTAGTTAGAGCTTATACAAAAGGTGCTAAATTGGGACTTGAAGCAGGTAAGATAATTTATAAGGTAATG…
HS-FS-000016-I-01_63_203	TTGAAAAAAACTATAATAAAGAATGTAAATCCAATGATTGAAAATAAGTTTATAGGACTTTTTGAAATAGAGTATAAAAACAAATTAGATGAAGATAAGGTTTGGATGGTAGCATCAAGAAAAAGTAGTGAGCAATTAAAAAATATTTATTTGAAGAATGAAGAAGATAGTGTAGATGCAGTTGTAATAGTTGGGCTTCATAAAAGTAGTAAAAAATTAATTTTAATAAGACAATTTAGAGTACCTATTAATGGATATATATACGAGTTACCAGCAGGTCTTGTTGATGAAGGAGAGTCTATAGATATTTCTGTTGAAAGAGAACTTAGAGAAGAAACAGGACTTACTCTTTTAGAAATTAAAAAAAATAAAAGTATTGATAAAGTTTATTTATCTCCT…
HS-FS-000016-I-01_71_75	ATGAGCAAAGTGGTAGAGACAAACCATCCATTAATACAACATAAATTAACTTTAATGAGAGATAAAAATACTGGTTCTAAAGACTTTAGAGAGCTTTTAACTGAAATTGCAATGTTAATGGGGTATGAAATAACAAAAGATATACCATTAAAAGATGTAGAAATAGAAACTCCTATTCAAAAAACATCATCTAAAGTAGTTGCAGGTAAAAAATTAGCAATAATTCCAATTTTAAGAGCAGGTCTTGGAATGGTAGATGGATTAGTAAGCTTAATGCCAGCAGCAAAAGTTGGACATGTAGGACTATATAGAGACCCAGAAACATTAAAACCAGTTGAATATTATTGCAAGCTTCCTCAAGACATAGGAGAAAGAGATATAATAGTAGTTGACCCTATG…
HS-FS-000016-I-01_63_420	ATGAAAGGTTTAATTTTAAAAGATTTACTTAATTTGAAAGGAAATGTAAAGTTTATACTTTTATTCATCATTATGTTTGGGTTTATGTCTTCTTTAGGAGATGGAAATGTTAATAACTTTATAGGTGTTATTATAGTTTTATGTACTACAATGATTGTTTCAACATTTTCATATGATGATTTAAATAAATGGGATAGTTATGTACTTACAATGCCTATTAATCGCAATGATATTGTATTAAGTAAATATTTAACTATGTTAATATTTAGCTTTATAGGTGTTCTTGTTTCACTTATTGTTAGTGTAACTATTGGTTATTTTAAAAATACACTTATATTAAATGAAACACTACTTATTAATGCACTAATCTTATCAATTTCAGTATGTTTTGGTAGCCTT…
HS-FS-000016-I-01_63_574	ATGAGTAATTTTAATTTTGAATTTTGTCTAAGTATATTTCCATTTTTGATTAAAGCATTGGGAATAACAATACTAATATCTATTGTTGCATTTTTTTTATCAATATTATTAGGTGTAATACTTGCCTTTTTCACACAGACAAAATCAAAAGTTTTGCAATACATAACAAGAGTGTATGTTTCATTCTTTAGAGGAACACCACTTTTAATTCAAATATTTTTCTTTTACTTTGGATTTCCAATGATATTTTCTTTTATGAAAGATTGTTCACCTTATTTAGCAATAGTAATTTGTTTAGGTGTAAATTCATCTGCATATATGACTGAAATTATACGAGCATCTATTGAGAGTGTTGATAAAGGACAACAGGAAGCATGTTATGCTTTTGGGTTAAGTAAA…
HS-FS-000016-I-01_64_48	ATGATAATTTCTGAAAATAAACCATTAGAAGAAGTGCTAGGGTACTTAAAGGATTTTGACAAGCTGGTTTTAGTTGGTTGTAATCAATGTGCAGCAACTTGTAAAAGTGGTGGGGAAGAAGAAGTTTTAAAAATGAAGGAAACTCTTGAAGGTGAAGGCAAAAAAATCTTAGGATATGTAATGCTTGACCCTGCTTGTAACCTTTTAAAGTCTAAAAAGGATTTAAAGGCTCTAAAAGAAGAGACTAAGGAAGCTGATGCAGTTTTATCTTTAGCATGTGGAGATGGTACACAGACAATAGTTAAGAATTTAAAAGATAAGCCAGTTTATCCAGCCAACAATACTTTGTTTATAGGGGAAGTACAAAGAGTTGGAGAATATGAAGAAGCCTGTAAGGCT…
HS-FS-000016-I-01_63_214	ATGTTGAAAATCAAAAACTTAAATAAATCATTTAAAAAAAATAGAGTACTTAAAGATATTTCTTTTGAGTTAGAAGAAGGTCAGATTGGAGTTTTACTTGGTAAGTCTGGTGCAGGAAAGACCACAATATTAAGATGTATAAATGGTCTTGAAGAATTTGATAGTGGAGAGATTATAATAGATAATGAGGTAATAAAAAATAAGAGAGATATGGCAAAAATACGAGGAAAAATAGGTATGGTTTTTCAAAATTTCAACTTATTTCCTCATATGACAGTCCTTGAAAATATAATTGAATCCCCAGTTAATGTTTTTAAAGTTCCTAGAAAAGAGGCTGAAGAGAGGGCTAGAGAACTTTTAAGATTAGTTGATTTAGAAGATAAATTAAATTCTTATCCA…
HS-FS-000016-I-01_63_227	ATGACAGTAGTATTAATAAGAAGTATTATATTATACATAACAGTGCTAATTGCACTTAGAGTCATGGGAAAAGGTGAAATAGCTGAAATGAACTGTTTTGATTTAGTTATAACACTATTAATTGCAGAAGTTGCATCTGTCCCAATGGAAAATAATAATATACCAATCATAAATGGTGTTGCAGCAATATCTGGTCTTGTAATCATGCAGACTCTTATTTCATTCTTATCATTAAAAAGCAGAAAATTAAGTTCATTTTTATCAGGTAAACCTTCTGTATTAATAGATAAAGGAAAAATTGTATATAAAGAGCTTAAAAAAGAAAGAATTAGTATAGATGAATTATTAGAACAACTTAGGATTCAAGGATACTTCAACCTAAAAGATGTACAATATGCT…
HS-FS-000016-I-01_63_102	ATGACAGAGCGAGAAAAAATGTTGGCAGGAGAACTTTACGATTGTGGTGATATTGAGTTGTTAACTCAATGGCATAAAGCAAAAGACCTAGTAAGAGATTATAACCAAACAGATTCCTCGGATTTGGAAAAAAAAGAAAAAATATTAAATGAATTACTTGGTGGTAAGGATAAAAACTTATGGATTACTGCACCGTATTATGTAGATTATGGAAATAATATTTATTTTGGAAATAATTGTGAAGTCAATATGAATTGTACGTTTTTAGATGATAATAAAATTATCATTGGGGATAATGCACTAATCGCACCAAACGTACAAATATATACTGCATTTCATCCAACTAATGCTGGTGATAGATTTGGTAATGTCAAAGAAGATGGTTCATTTGAATTTTGT…
HS-FS-000016-I-01_68_158	ATGGAACTATTATCAAAATTACCTTTGGCTGATGTACCATATACAAGTTCAATGCAATTGTTTTTATTTCTAACTGCATTAATGTTTTTACCATTTGTAATGTTTATGATGACAAGCTTTGTCAGAATAGTTATAAGTTTATCATTTTTGAAATCAGCATTAGGAGCACAGCAAGCAATTCCAAGCCAAATTTTGGTAGGGCTTGCAATAGTATTGACAATATTTATAATGAGACCAGTATTAAATGAGATAAACGAAAAGGCATTACAACCATATATGAAAGAAGAAGTTACTATGGAAGAAGCTATGAAGGAAGCAGAGGGACCTATTAAAGAATTTTTATTAAAGCAAACCAGACAGACAGATTTAGATTTATTTGTAGAACAGGCTGGTTTGAAA…
HS-FS-000016-I-01_73_79	ATGATTATAAAAAAATTTGTAGATAGTTATTTTGGAGTAAATACTTATGTATTAGGTGATGAAAAGACTAAAAAATGTGCAGTTATAGACCCAGGTGGAAGTTTAGTAGAGACATTAAGTTTTGTAAAAGAAAATGAATTAAATATTGAATATATTATCCTTACTCATGGGCATGGAGACCATATAGGATATGTTAAGGATATTAAAGAAAAAACTGGTGCTAAAGTAGTTGCACATGTTGATGAAAAAGAATTATTAAATGATAAAAATAAAAATCTAAGTTATACAATGAGATGTGGAGCGCAAGAGTTTGATGCAGATATCTATGTGAGTGATAAAGACAAGCTTGAACTTGGTGAATTAAAAATGACTTTCTTGCATACTCCAGGACATACTCAA…
HS-FS-000016-I-01_80_5	ATGTTAAAAGATATAACTATAGGGCAATACTACCCAACAAGTTCTGCTATTCATAAATTAGATCCAAGGATAAAGCTTGTAGCGACAATTGTATTTATGGTATCTATATTTGTAGTAAATAAATTTTGGCCTTATATAGTAGTTTTATTATGTTTATTAGCTATGATAAAATTGGCTAATATACCAGTCAAATATATTGTTAAGGGTGTTAAACCTCTTAAATGGATTATTTTGTTTACATTTCTTATAAATATTTTTTTCTTACCAGGTGATGAAATATGGTCATTTGGATTTTTAGCTATTACAAAACAGGGTCTAAGACAAGCAATTTTTATGGCAATAAGATTAATATTTTTAGTAGTTGGTACATCATTGCTTACTTTAACAACTTCACCAATA…
HS-FS-000016-I-01_76_94	GTGGAAAAAATCAAAATAGTTTTAGCAGATGACAATAAGGATTTTTGTCAGGTATTAAAAGAGTATTTGTCTAATGAAGATGATATCGATATATTAGGCATAGCTAAGGATGGAATTGAAGCATTAGACTTAGTAAAAAAGACACAACCGGACTTATTAATACTAGATGTAATAATGCCACATCTAGATGGATTAGGTGTAATTGAAAAATTGAATACTATGGATATACCTAAAATGCCAAAAATAATAGTACTATCAGCAGTAGGTCAAGATAAGATAACTCAAAGCGCAATAAATCTAGGAGCAGATTACTACATAGTAAAGCCATTTGATTTTGTTGTGTTTATAAACAGAATTAGAGAGCTAGTTTCTAATAGAGTTACACAAGTTGAGCCAAAA…
HS-FS-000016-I-01_76_104	ATGTTTGAAAAGATAGCACAAAGTAGTAAATTTATAAATTCTAAAAGTAATATAAAACCTAAGATTGGTTTGATATTAGGTTCTGGACTAGGTGATTTAGCAAATGATATAGAAGACCCTGTCACAATTAAATATAGTGAAATTCCAAACTTCCCTGTATCAACAGTAGCAGGACATGCTGGACAACTTGTAATTGGAAAACTTGAAGGAAAAGAAGTTATTGCTATGCAAGGTAGATTTCATTACTATGAAGGATATTCTCAGAAAGAAGCTACTTTTCCAGTAAGGGTTATGAAAGAATTAGGAGTCGAGATTCTTATAGTAACTAACGCTGCTGGAGGCGTAAATAAAGAATTTAAAGCAGGAGATTTGATGCTTATAAGAGACCATATAAACTTT…
HS-FS-000016-I-01_71_33	ATGAGCAAGAAAAGAAAACTAAAGAAAAAAGCTGCAATATTAATAGGAGTAGTTGTTTTCTTTATAATATACTTTATATCCTTTAGAATAGGAATAAATATGGAAAAGGATAAAAGTGAAGTGCCAAAGAAGGTAGAAAAAGAAGAAGAAGATAATAGGTCTTTAAGGACTCAAATAAAAGAAAAGAAAAAGGTTTATATATCAGACAAAAATATAGAAAACATAAAAATTGAAGAAGATATGTGGGATGAAATAAAGTTATTTTTCTCAGATTTTAAGAAAGTAAGAAATACTACTTCTTCTTACGAAGCAGTTTATGAAGGTTATTCTGATGATGGAGTTAAATTTTCTACTGACCTTAACTTTTTTAGAGTATATACTGTAAATAAAGAAGAATAT…
HS-FS-000016-I-01_66_187	ATGGAAATATTCGCAATAGGACATTCAAATTATCCATATGATAAGCTTATTAATATGATAAAAAAATATGACATAAATTGTGTAGTTGACATTAGAGAAACTCCATATTCTAAATATAATATTCAATACAATAAAGAGGCATTTAACGAATCTCTTAGAAATTCCGGATTTATATATATATACATGGGAAAAGAATTTGGAGCTAAAAGAAATAATAAAGATGTATATACGCAAGAAGGTTATGCAGATTTTGAGAAAGTAGCAAAAGAAGATATTTTTTTAAACGGAATAGAAAGATTAAAAAAGGGTTGTCAAATGGGTTATAGGATAGTTTTATTAGGAGCTATGCAAGAACCTATAAGATGTCATAGAAGTATTTTGGTGGGAAAAGTATTAAAT…
HS-FS-000016-I-01_66_65	ATGAATATAATAGTAGACTATGGTCTTGGAAATATAGATTCTGTGTCTAGGGGTTTTAGAAAAGCTGGAATAGAAACTAAAATTTCTAGTGATATAGATGAAATAAAACAGGCAGATTCACTTATACTTCCAGGTGTTGGAGCTTTTAGAGATTCTATAAGTGCCTTAGATAAACTAGGATTGATACCAATAATAAAGGAGCATGTTTCTAAGGGTAAATTTATGATAGGTATATGTCTAGGAATGCAATTACTTTATGAAAAAAGTTATGAGTATGGAGAATATGAAGGATTAGGACTTATAAAAGGAAGTATTGATAAACTGGATATAACTTTAAAAGTGCCACATATGGGATGGAATAATCTAAAATTTAATAAGGCAAATGATGATATACTTAAA…
HS-FS-000016-I-01_63_110	ATGAAAGTTTTATTGATAAACGGTAGCCCAAACCAATATGGATGTACTTATACAGCACTAAATGAGATTACTAAAGTATTGAGTAAACACGATATTAAAACAGAAATACTGTATTTAGGTAAAGAAGCAATCCCAGGATGTATTAGTTGCGCATCCTGTTTTGAAACTGGAAAATGTATTCGAAATGATAAAGTTAATGAATTGATTGAAGATCTCGATAATATTGATGGTATTATTATTGGTTCTCCTGTTTACTTTTCTAGTGCAACTGGTCAATTAACTTCTTTTCTTGACCGTCTATTTTTCATAGCTGGAAGTCGCATGGCTACAAAATTAGGTGCTTCAGTTGTGTCATGTAGACGTGGTGGTGCAAGTGCAACATTTGACCAACTAAATAAA…
HS-FS-000016-I-01_74_42	ATGGTTAAAGATAAAGTTGTATTCGTAACAGGAGCTGCAAGTGGAATAGGTAAACAAATAGCTGAATCGTTCTTAAAAAATGGTGCTAAAGTAATGTTCTCTGATATAAATCAAGAAGCTTTAAATAATACCATAACAGAGTTACAAAAAAAAGGTTATGATTGCATGAGTGTAAAGTGTGATGTAACTAAGGAAGAAGAAATTAACCACGCTATAGATAAAACTGTTGAAAAGTATGGCAGATTAGATATATTAATAAACAATGCTGGACTTCAACATGTTTCTATGATAGAAGATTTCCCAACTGATAAATTTGAATTTATGATAAAAATAATGCTGACAGCACCTTTTATAGCTACTAAAAAAGCATTTCCTATAATGAAAAAACAAGGCTTTGGT…
HS-FS-000016-I-01_64_26	ATGTTACCACAGGAAAGATACGAGAAGATTTTAAGTATTCTCAAATCAGATAATATAATTAAAATAAATGACATAGTTCAAATGTTTGATATATCAATAGAAACTGCACGAAGAGATTTAGCCCATATGGAAAGTATCGGTCTTTTAAAAAGAGTTTATGGTGGTGCTATACCAGTTATAGCAAGTAGCGTAGAACTTAACTATGTTAAAAGAAAAAAAATAAACTCAAACGATAAAAAACAGATTGCTATTAAATGTAGTGAGTTTATAAATACAAATGATACTATTTTTATGGATACTGGAACTACTGTACTTGAAGTTTCAAAAAATTTGAAAGATAAAAAGAATCTAACTGTAATAACCAACTCAATTTTAGTTGCAAATGAACTTATGAATACT…
HS-FS-000016-I-01_69_7	ATGGTAGCAATCTTAAAGGCATTATATGTAGTATTCGCAGCAATCTTTGCAGTTGTGTTTGGTAAAGACGTAGCTAAAGCAAACAAAGAGGGGAAACTAGAAGAACAAAGTACTCCAAAAGTTGCTGTAACAGGATTTATAACAGACTTCTTTGATACATTAGGAATAGGGTCATTTGCTCCAACAATAGCAATGTCAAAGGCTTTAAAGTTAAATATACCAGATAAAAAAATGCCTGGTACATTAAACGTAGCACATACTATTCCAGTTGTTACAGAAGCATTCATATTTACATCAATCATACCAGTTGATGGTGTTACTTTAGTATCTATGGTTGTGGCAGCAGCAGTTGGTTCATATATAGGTGCAGGAATAATAGCTAAGATGGACGAGAGAAAA…
HS-FS-000016-I-01_70_121	ATGAATAAAAACAATTGCTTAGATTTAATATTTGAAAAAGTAGACCCTTCAAGTGTTGGCATGAGTTCAGAAAAGCTCTCACAACTGGAACCTTTAATAATCTCACAATATAGTAATATAAATGGAATAATTATTGCAAGAAAAGGAAAAGTTGTCTTTGAAAAGTACTATAATGGATATAATGCTGATGATACTTTTCATGTTGCATCAGTTACAAAAAGTATTATATCAGCCTTAATAGGTATTGCAATAGATAAAGGATATATAAAAGATGTTGACCAAAAGGTTGTTGATTTTTTCCCTGAATATACTTGTAGTCCTTCTGAAATATGTAAAAAAGCAGTAACTATACGTCACCTACTTACAATGACTGCACCATACCCTTTTAAAAATATGACT…
HS-FS-000016-I-01_70_134	ATGAGAGAGCTATTAAAATGGGTTTCCATTATAAATAGATACAATACAAATTATATTGACAGGAAATTGGCGGATATTGGAATCAATAATAGCCAATATTTTTATGTATTACACATATGTAATAATCCAGGTATTACACAGGACACTATATTTGAGAAAATTCTTGTGAATCCTAGTAATATAACGAGAGCTTTGGCAAATTTAGAAAAAGAAGGCTTTATAACAAGAGAACCAGGTGTAAAGGATAAAAGAACATGGCATTTATATCCTACAGAAAAATCTTTAGAATGTTATGATGAAATACTAAAAATAACAAATGGGTATGTTGAGGAGTTGTTGAGTTCATTTGAGAAAGAAGAGCAAGAGTTGTTTATGTCAATGTTAAAGAAAGTTGCATTT…
SRR4300546_ST1_106_195	ATGGATGCAATAACTATAAAAAATTTAAATAAAACTTATAAAGATTTTAGCCTACAAGATATATCTTTTTCAGTACCAAAAGGGAGTGTAATGGGATTTGTAGGTGAAAATGGTGCAGGAAAAACAACTACATTAAAAGCAATTTTAAATTTAATATCTTATGATAGTGGAAATATAGAAATATTTGGTCTTGATAGTAAAAAAAATGAAAAAGAAATTAAAGAGCAAATTGGGGTTGTATTTGAGGGAAGCAACTTTCATGAAAATTTAAACACTGACCATGTTTCAAAAATCATGAGTAAAATCTATAAAAATTGGAATGACACATTATTTAAAGACTACTTAAAAAAATTGAGAGTACCAGACAATAAATTAATTAAGGAGTTTTCAAAGGGGAAT…
SRR593312_ST1_125_5	ATGAAACTTGTACTTGCTGAGAAACCATCTGTGGCAAAAACTATAGCATCATTTTTAGGTGCAAAGACCAGACAAGATGGTTACTTTGAAGGAAATGATTATATAATTACTTATGCAGTTGGACACTTAGTATCATTATATGATATGAAGGATTATGATAAAGATAAATACTCTGGCTCTTGGAAAATGAACAATTTCCCATTTGTTCCTGAGGATAAGTTTAAATTTAAGATTGATAGTTCTAAAACTAAACAATTCAACACTGTAAAAAAGCTTTTGAATAGAAAAGATGTAGAATATGTAATAAATGCCACTGACAATGACCGAGAAGGAGAACTTATAGCATTTTTAATATTTTTACTGGCAAAAAATAAAAAACCAGTAAAAAGAATCTTGGTA…
SRR4300546_ST1_112_66	ATGAAAGGATTAGTTTTAGAAGGTGGAGGAACAAAAGGAGCCTACCAAATAGGTGCATATAAAGCTTTAAGAGAGCTTGGTATAGAGTTTCAAGGAGTAACTGGCACATCAATTGGTGCTTTAAATGGAGCATATATAATTCAAAATGATATTGAAGTAATGGAAGATATTTGGTTAAATTATGACTATACTCATTTTATGAATATTGATAGAGAAACCTATGAGAGGTTTAAAAATGTAGATTTCACTACTAAAAATCTCAATGCAGTGTTTGAGCTTATAAATAAAGCTAGAAAAAATGAAGGTATAGATATAAGCCCATTAAGACAACTAATGGAGACAACATTAAATGAAGACATAATAAGGAAATCAAAAAAAGACTTTGGACTTGTTACGGTC…
HS-FS-000016-I-01_69_187	ATGACAAAGGTTATAGTATTATCAGTAGATTCTTTATTTGAAAAAGACTTGGAATTTGTAAAAAATCTACCAAACTTTAAATCTATACTAGAAAATTGCTCCATAGTAAAAAATATAAATTGTGTTTATCCCACTCTGACATATCCGTGTCATACTAGTATGGTTACAGGAGTATATCCTAAAAAACATGGTATATATCATAATGAAAAATTTGACCCAAATAAAGAAAATAAAGACTGGTACTGGTATTCAAAGGACATAAAAGTAAAAACTATTATAGATGTAGCAAAAGAAAATAATCTAACTACCTCTAGTGTATTATGGCCTGTAATGGGAGCAAATCCAAATATAGATTATAATATTGCAGAAATATGGGCTCCTAGTAGAGAAGATGACCCA…
HS-FS-000016-I-01_70_129	ATGGCTAAAATACTAGTTGTAGAAGATGAAAAAAGGATGCAAAGTATTATTGTAGAATATATGCAAAAGGGAGGATATACTTGTATAACTGCTAATGATGGAGTCGAGGCACTTACAATATTAAAGAGCAACAATATAGATTTAATGATATTGGATATTATGATGCCGTATTTAGATGGATTTTCAGTGTGTAGAGTTTCACGTGAAATGACTAATATACCTATTATCATATTGACAGCTAAAGGTGAAGAGGAGGACAAATTAAAGGGTTATGAATATGGCGCAGATGATTATATAACAAAACCATTTAGCCCAAAAGTACTTTTAGCAAAAGTTAATGCCTTGTTACGTAGATACACTACTGATATTCCCAAAAATTCATTGAGTTTAGGAAAGATT…
HS-FS-000016-I-01_70_127	ATGAAATGGTATACATGGTTGACTATTATATTGATAATATTGCTTTCTATTCCGCTTAAAATTAAATTTATAAAATGGTGGGATAGACGACAAAAAAATGATAAAGGAGGTTATGATAGATGA
HS-FS-000016-I-01_65_227	ATGATTCTTATGATAGACAATTATGATTCTTTTGTATACAACCTAGTCCAATATATAGAAGAATTAGGGGAAGCAGTTGTAGTAAAAAGAAATAATGAAATCAAAATAAGTGACATTGAAGAACTAAATCCAGAGGTAATTGTGTTATCTCCAGGACCGTGTTCTCCAAAAGAAGCTGGTATTTGCATAGATATTGTTGAGCATTTTAAGGGGAAAAAACCTATACTAGGAATTTGTTTAGGTCACCAAACTATTGGATATGTTTTTGGAGGAGATATTATAAAAGCACAACAGCCTGTGCATGGAAAAGTATATAGTATCAACCATACTAATAAAGGAGTTTTTAGGGGACTTAAAAATCCTTTAAATGTCACTAGGTATCATTCACTAATAATTGAT…
HS-FS-000016-I-01_70_100	ATGGCTAATTTAAAAGTTAATTTATATGGAATGGAATTTTTAAACCCAATTATGACAGCGGCAGGACCTGGAGCAAAAGATGGTGCTCTCTGTCAAGAGGCAGCAAAAGGTGGAGCAGGAGCTATATGTACAAAAACTATATCTGTATTACCAGCTGATGTACCAAGACCATGTATGGCAAAAACTAATAGTGGTTTTTTAAACACAGAATTATGGTCAGAGCTTCCAAAAGAGCAATGGATAGAGGAAGAATACAAAAAGGTAAAAGAAACAGGGCTTCCAGTAATAGTAAGTATGGGATATTCAGCAGAGCAAATAGCTGAGGTTGCTCCTTTAGTAAAGCCTTATGCAGATGCAGTTGAATTATCTACTCATTATGTAGGTACAGACGTTGCACCA…
HS-FS-000016-I-01_65_244	ATGGTTTTAAATTTAGATTTTAATAGTGATAAATCTATTTATGTACAAATTAAAGAAGAAATAACTAAGGCTATAGCTTCAGGAGAATTGAAAATAAATGAATCACTTCCATCTGTAAGAAGTATGGCAGAAAATATTGGTGTAAATTTACATACAGTGAACAAATCCTACAATGAGTTAAAAGAAGAGGGATTCTTAAATATTGATAGAAGAAAAGGTGCTATTGTAGCTCAACTACCAATGAAAATAGATAATACAACTCGTCAAAAAAATAAACTTGACTTGGAATTATTGGTGGCAAAATCTTATTTATCAGGTATTAGTAAAGAAGAATTTTTGTCACTAAGTTCAAGTTTATTTGACAAGTATGAGGTGAAATATTATGAGTAA
HS-FS-000016-I-01_70_110	ATGAGTAAAAATGTATTAATAGTATCAGCTAGTCCTAGAAAAGGTGGAAATTCTGACTTATTGTGTGACCAGTTTATACAAGGGGTATTAGAATCTAAAAATCAAGTGGAGAAGATATTTTTAAAAGATAAAGATATTAACTATTGTACTGGATGTGGTGCTTGTTATGAAAAAGAAGCAAGTTGTTCACAGACAGATGACATGGGAGAAATTCTTGAAAAAATGATTGGGGCAGATGTGATTGTTTTAGCGACTCCCGTTTATTTTTATACTATGAATGCGCAAATGAAAACTATGATTGATAGAACTTGCTCTAGATATACTGAAATTTGTGATAAAGATTTCTATTTTATCGTTGCAGCAGCAGATGAAAATGTGGCTGATATGGAAAGAACAATA…
HS-FS-000016-I-01_70_126	ATGATAAAAGTAGGAGAGTTAAAATTTTCTTATGGAAAAGATAAACAGATATTGCATGGACTTAATTTTGAAGTAAAAGAAGGAGAAATCTTTGGATTCCTTGGACCTAATGGTTCAGGAAAATCCACAACACAGAAAATCTTAAATGGCGTTTTAAAAGGTTACAATGGGCACGTATCCCTTTTTGGGAAGGAAGTTAAAGCATATACAGAGTCTCTATATCAAAAGATTGGTGTTTTATTTGAATTTCCTTATTTATATACCAATTTAAGTGCAATTGATAATTTAGAATATTTTTCGTCTTTTTATCCTAAAAATCAAAGGAGAGACATATATGAACTCTTAGATTTGTTAGAGTTTAAGAAAGAGTTTATAAATAAGCCTGTATCATCCTACTCA…
HS-FS-000016-I-01_65_194	TTGGCTGATGAAAAATTTGTAATGTCATTTAGTGGTGGTAAGGATAGTATATTAGCATTAAATCGAATGTTGAAAAAAGGATATAAGCCTGTGGCACTCTTGACAACTATAAGTGAAGAACATGGAAAGTCATGGACACATAATTTAGAATATAATATGCTTAAGCAAGTAAGTAGCAATATAGGATTACCTTTATTAGTTGCTGAGTGTGGTGTAGAAGGATATGAAGAGAGCTTTGAGAGGGCTTTAATAAAAGCTAAAAACATGGGAGCAACGATATGTGCATATGGAGATATAGATATAGAAAGTCATAGAAAATGGGATACTGATAGATGTGAAGCAGTTGGTATGAAAGTAGATTTACCATTATGGCAAGAGAGTAGAGAGGATTTAGTATAT…
HS-FS-000016-I-01_69_5	GTGAAAAGCATATTATGTCAGATAAATAAACAGCCAGTTAAAGCTAAATATACATCTGATGAATTAGAATGTTTTTTGGATACAATTGAGTATAATGTAGGTGATAAAATATTGCTTGTTGGTCATATAGGAAACCTAGGCAAGAGATTGAGAGGTCTTGGAACTTCTGTAACTATACTGGAGAATAGTAATTATGAAGATGTCTGTTATTCTCTAGTGTATAATGAAAATTGCAATGTAGTTAAAGGTAAGTTAGAGTTTCTACCATTTGATGATAATCAGTTCAACAAGATAATAATAGTTGACCAATTTAATGTTATTACAGATTGTGAAAAAGCTTCATCTGAAATACAAAGAGTGTTAAAGGGCAATGGAGAGGTTATATTAGAGGATTTAAAT…
HS-FS-000016-I-01_63_338	ATGAAAATTACTTTACCAGAAACAGCTATTGATACTTTAAAAAGTATCTTAAAAGACAATCAAGATAAACCTAATAATATAAGAGTATACTTTGCAGGTGTTGGTTGTGGAGGTCCTTCTTTTGGATTAGCTTTAGATGAGAAAAAAGAAGATGACTTAACTTATGAAGTTGGAGAATTACAATTTGTAATGAGCTCTGATGAATATAGTCAGTATGGAGATATAATAATAGAAGATACAGGATTTGGATTTAGAGTTATTCCTGAAAATATGAAAGATCAAGGTGGAGGAGGATGCTCTGGTTGTTCAGGGTGCCACTAA
HS-FS-000016-I-01_71_26	ATGGATGATGATATAAACATGATAGCAATTAGACCAGAAGATATAAGGGTAGAATTTAATAGAGATTTCAAAGAAATTATAGACCTCAAACTCAGACCGTATCGATATAAAAACTAA
HS-FS-000016-I-01_68_206	ATGAAAAATGAAAATATAAGTTATTTGGCGTTAGGATTATGTTTTGGTGTTGTTTTGGGTTCATTATTTAAAAACTTAGCTATTGGTTTATCCTTTGGATTAGTTATTGGAGTAGTATTAGACAGTAAGAAAAATAAATAA
HS-FS-000016-I-01_86_1	ATGAAAAGTTTAGTTTTATATTCAAGTTTAACTGGAAATACTAAAAAGATTGCTTATGCTATATATGATGAAATTCAAGAAGAAAAAGACATTAAAGATGTAAATGAATTAGTTGATTAA
HS-FS-000016-I-01_80_98	ATGAACTATATTAAAAAAATGTATAAAATCTTACGTAAAGATGAAAATAATTATGTAAACATAGAAAAAAACAGTATAAAATCAAGTCAATTGTAG
HS-FS-000016-I-01_67_149	ATGAGTGCAAAGGTAACGAATCAATATGGAAATATAGAAATAGATAATCAAGTAATAGCTCAAGTCGTATATAGAGCTGCAATGGAAAGTTATGGCTTAGTAGGTTTAGCATATAAGTCTAAAGGAATAGTAGAGCTATTAAAAGGCGAGAACGCAACTAAAGGTGTAAGAGTTGAGGAAGTAGAAGAAGATGCCATAGCAATCGAACTTTATGTTATAATACAATATGGTACAAATATATCTACTGTTGCCAATAATATAATAGATAGAGTAAAGTATGTAGTTGAAAAAATGACTGGCGTAAGAGTTACTAGAATTGATATTAATGTACAAGGAATAAGAGTTAAGTAA
HS-FS-000016-I-01_64_146	ATGGATGTATATAGTTTTTGGAATGACACTTTGGCACAAGATGCTGTTAAGATAAGAAAATATTTTCATGAAGATGCTTATATTAATTGGCATGATACAAATGAGCATTTTACTTTAGAAGAATTTATTATTGCAAATTGTGAGTATCCTGATAAATGGAATGGTAAAGTAGAAAGGGTGCTAGAATTTGGAAATTTAGTAATTACAGTGACACATGTTTATGCAATAAATAAACCACTATCATTTCATGTCGTTTCATTTATCAGCCTTAAAGATGATAAGATTATTTCTATTGATGAATATTGGGGAGAGGATGATGATGTGCCACAGTGGAGATTAGATAAACATATTGGAAAGCCAATAAAATAG
HS-FS-000016-I-01_63_590	ATGAAAAAGAGTAATATTTTTAGTATCATATTTCCTACAATCATAATGGTGCTAATGTTTTTAACTTTTGCTACAGATATATTTAATATTCCAGATATTCAATCTAAAAGTATTTTTGTTGTGGGAATGGTTTTGATTTTTCCAATTTCTTTTTTAATACAAGGGATAATTTGTGTATTAAATAAGACTAATTGGATTTTATCTCTTATTGTGTCTTTAGTAACTTATATAGTATTAATGTATATATTTTTAAATGATTCTGCATATATATATGTTTTACTTTATACAGCTTTTTATATGATTGGACATATAACAGCTAAACTCTATTACAAAATTAAGACTTTTAAAAATTAA
HS-FS-000016-I-01_64_2	ATGGAATTAATATACAGTACTCAAATAAATAAAATAGGAGATAATGCAAATGAATTTTTACAACATAATATGTTTGTAACTTTCAAAGATAATGCTCCTCAAGAGTTAGAAAATTACTGTTATATACATTCTGAAAATAATTTAGTAAAAGAAATACTTACGAATGATGTGTTATCAATAAATAATGTTGATTACAAAATTACTTCTGTTGGTGAGTTAGTAAACCAAAATCTTTCAGAATTAGGTCATATAACATTTAAGTTTACAGGTGAAAAAGATGGAGCAATTGGAGGGACCTTATATCTTGAAGAAAAAGAAATAGCACCTATTGGCGTAGGTACTATACTAAAAATAATTAGAAAATAA
HS-FS-000016-I-01_77_61	ATGGACTTAGAAAATCAAAACAGAGTTAAAGATGCTGCTGATAAATTCGGAGCTGAAAATGTTGTGATTTTACTAGGTGCTGCTGAAGCCGAAGCTGCAGGTCTTGCAGCCGAAACAGTAACTGCTGGAGATCCAACTTTCGCTGGACCACTTGCTGGAGTTGCCTTAGGATTAAGTGTTTACCACGTTGTTGAGGAACCAATAAAATCATTATTTGATGAAAGTGTATATGAAGACCAAATAAGTATGATGGAAATGGTTTTAGAAGTTGAAGAAATAGAAGAAGAAATGTCTGGTATAAGAGAAGAATTTTGTAAATTTTAA
HS-FS-000016-I-01_70_21	ATGGAAAAAGAATGTCAACAAAGAATGCAAGAAATAACATCTAAATTTAAAGAATGTCGCAAAGCTATCTCTGCTATGGGTGATGAGACTAGACAATTGATTTTAATTGCTCTCTTAGAGAGTGATTTTAATGGTATACGAGTGGGAGAAATCACAAAAAAAACACATCTTTCTCGTCCTGCTGTATCTCATCATCTTAAGATATTAAAAGAAGCAGAGATTGTTAATTTGCGTAGAGAAGGAACGAAAAATTATTATTATCTTGATTCAAAAAAATCACAATGGAAGTCACTAACAGAGCTAATAAATCTTATATTTGTTGGAATACAACATATTAGTGAAAATGATATAAGAAAAGGTGATTAA
HS-FS-000016-I-01_74_63	TTGAAAAAAAATTATAAAATACATAATCTAAATGAATATAAAAATAAAAAAAAGAATAATTATAAAAAGAGAAATAAGAAAAAAATAGGAGCTAAATGCATTTTACTGATTGCAATTTTTTCAGTAATAATATTGAATCTATGTGGTTATTCAAAAATCTCGGAAATGAAGTACGATATCTATTATTTACAAAAAGATTTAAGAAAAAAAGAGATAGTATTAGAGGAACTAAAGGCAAAAGAAACTGAAAAAACATCAATAAAAGAAATTGAGCTAAAGGCTAAGGAATTGCTCAATATGGACTATCCAAAAGATGGACAAATAAAGTATATAGATGTGGATAACTAG
HS-FS-000016-I-01_80_53	ATGAGAGTTAAAGTAACTTTAGCATGTACAGAGTGTAAGCAAAGAAACTACAACACTACTAAGAATAAGAAAAATAATCCAGACAGAATAGAATTACAAAAATATTGTAGATTCTGTAAAAAGCATACAACTCATAAAGAAACAAAATAG
HS-FS-000016-I-01_63_502	ATGGATAGATTAAAAAGAGATATGAAAAATATGAAAGAAGATTTAAAAGAAGGTGTTAAAAAGACAGCTTATGTTATGAAAAATACAGCTGAAGATTTGAAAGATGATGCACAAGGTGCTATGGTAAACTTAGAAATGAAAAAAGATGAGATGATGGAAAGATATGAACAAAAGAAATTTTCTAAAGAATTAGAGAAGCAAATGAAGAATGAAATGAAATAA
HS-FS-000016-I-01_68_182	ATGTCTTTAGTAAAATATTGCAGATGTGATGATAGATTAATACATGGTCAAGTGATATATAAATGGGTTAAGCATCTAGGTGTAAAAAAGATAGTAGTAGTAGATGATGAAACAACCAATGATGTTATTGCTAAAGGTTTGATAAAAATGGCAGCACCAAAGAATATTGATTTATCAATATTAACTGTAAGTGAATCAAGGAGATATTTTTATAATAATCAAGCTGATGATAACGTTTTTGTATTAATTAAAAATTTAGATACTGCAAATAGAATGATAGAAGAAGGGATTAATATCAAAAAACTTATTGTTGGAAGAATACCTACAGGAATAGGAAAAAAGAAAATATCTCAAAATGTATACATTAATAAAAAAGAGTTTCTTTTAATAGATGAATTT…
HS-FS-000016-I-01_82_19	ATGAATGAAAAGCCAAGTTTTAAACAAATTGAAATTATTTTAGCAGTTATTTTTTTGGTACTTACATATTACAAGATTGGATTAACTCCAGCATTTATTGTTATATTTATACCATTATACTTAAGTTATTTTGCAGTATCTATGATTGTAAATCAAATAGCAATTAAGCTATTGGAGATAAGGCAAGCTAGGGAAGCTACTAATTACAATATAGGAAATGGATAG
HS-FS-000016-I-01_68_106	ATGAGAACACTTTCAGAAACTGAAAAAATATCTTTAGCAGCAGTTATAAAAATGGAGTCTGACGGATTACTTATGCAAAGAGCAATAAATATGTTAATATCAGATGAAGACCTAAAAAGACAATCAGAATCTAGTATATTAGCAACAGAAGGAAGAATTAAAGCTATACAACAATTTATAGTTGAAAATGAAATACTAATTTCTGAGGAGGTATAG
HS-FS-000016-I-01_67_145	ATGGAAAATAAACCTAGAAAAGCTATATTTGCAGGAAGTTTTGACCCAATTACTAATGGACATTTAGATATTATTTGCAGGGCTTCGAAGTTATTTGACGAATTACAAATAGGAGTATTAAATAATCCTAATAAAAAGGGTCTATTTAGCTTTGATGAAAGAGTAAAACTTATAGAAAAAAGTACAAGCCATTTAAATAATATAAAAGTTGTGACTTTTGATGGTTTATTAATAAATTACTGTCAGGAAAATGGGATTGGAGCATTAGTTAGAGGTGTGAGAAGTGGTGCTGATGTTGATTATGAACTTCAGATGGCACATATGAATAGAGAGCTTAATCCAGATATAGAGACTATAATTTTACCAAGTTGTACAAAATATTCATTTATAAGTTCATCT…
HS-FS-000016-I-01_68_184	ATGGCAAAAATAACATTAGTAAGAGTAGACCACAGATTAATTCATGGGCAAGTTATAACAAAATGGGTAAAAATCGCTCAAGCTCAAAAAATAATAATAGTTGATGACTTCTTAGGTCAAGATGAATTTATGGCTGACATATATAAAATGGCAGCACCATCAGGAGTAGAAGTAGTTATTTTAACAGCAGAAGATGCGGGACAAGCATTCCAAAACAACACTTTAGGAGATAAAAATATATTTATTCTATTTAAAAATGTTGATATGGCAAATAAGGCTTATAAAGCTGGACTTAAATATGAAAAGATTCAATTAGGAGGTATTCCAAATGAAGCAGGAAAGAAAATGGTGTTTACAGCTGTTTCATTAGGAAATGAGGATGTAGAACAACTTAATGAA…
HS-FS-000016-I-01_65_93	ATGAATTTATCTGAAATAGCAGGTAAGGAAATAGTTAACTTGGTCACAGGAGAAAGATTGGGGGTCATTGGAGAATGTGACCTTATACTAGATGAAACTACAGGCGGTATATTAGCGCTTCTAATTCCAAAGGAAAAAGGATTTTTTGCCAGAAGAAAAGATAAGTCATTTTTAGAAGTACCATGGAGAAATGTAAAAAAAATAGGTAATGACATGATAATTATAGAATATGAGGGATATATTTAG
HS-FS-000016-I-01_66_159	ATGATAGGACTTAAAAGACGAGATATGAATTATATTATGAAAGTTGGTGCTAAAGCTCAAGGTGTTTCTGTATCTGAATTTAGGGCTATGCTACAAGATACCATAGACAAAACTATGGAAAGTACAGACCCAGACGTGCAGGCAAATTTTAAACGATACTTTGGAAATAAGCGGCCAACACCAGAGGAATATATTTATACGATTACCAAAAAGACAAAGGTTAAGGTTTAA
HS-FS-000016-I-01_67_1	TTGACAAAGTGTCCTAAATGTGGAAAGGAAGTATCATCACGTCCAGGTAGTATATGCCCACGATGTGGATTTAAAGTAGCAGATGAGAGTCTAAAAATAAGATGTCCAGAACCTAGTTGTAGGGCTTTGGTATCTAGGAAACTGGATTATTGTCCTAAATGTGGATGCAAACTTAGAGGATATAATATTTCTGAATTTGTTAACATGGTAAGATGTAAAATAGATGAGACATTTGATAAAAAATAA
HS-FS-000016-I-01_80_29	ATGGAAAGAGGAAGAAGAAAAGTTAGAATAGGCCGTGTTGTTAGTGATAAGATGGATAAAACAATAGTAGTAGCTGTTGAAGAATTCGTACGTCATCCACTATATAATAAACGTGTTAAGAGAACTAAGAAATTCAAGGCTCATGATGAAAAGAATATATGTAACATCGGAGATAGAGTTAAAATAATGGAAACTAGACCATTATCTAAAGATAAGAGATTCAGACTAGTTGAAGTTGTTGAGAAAGTTAAGTAG
HS-FS-000016-I-01_80_30	ATGAAAGCTAAAGAATTAAGAGATTTAACAAGCGAAGAGCTAATGAACAAATTAAACGACTTCAAAAGTGAATTATTTAGCTTAAGATTCCAATTAGCTACTGGTCAATTAGAAAATACAGCTAGAATAAAGTTTGTTAAGAAGGATATAGCAAAAGTTAAAACTGTTCTTGCTGAAAGAAAGTTATACGAAACTAGAGCTTAA
HS-FS-000016-I-01_76_63	ATGTTTAATAAAGTTGTAGAAATAATAATAGAGCAATTAGGAGTAGAAGATAAAGAAATAACTATGGAGACATCATTAATGAAGGATTTAGAAGCAGATTCATTAGATGCAGTAGAAATAATAATGGCACTTGAAGATGAATTTGGTATAGAAATACCAGATACAGAAGCAGAAAACTTCAAATCTATAGGAGATATAGTTAAGTATATAGAAGCTAATAAATAG
HS-FS-000016-I-01_81_30	ATGTTTGACAAGAAGAAATTAGATAGGATTAATGAATTAGCAAAGAAAAATAAAGAGGGAATCCTTTCTGCTGATGAAATCAAAGAAAGAGAAATTTTAAGGAAAGAATATTTAGAAAACTTTAGAGCTCACTTTAGATCAAGACTAGATAGTGTCAAAGTAGTTTCACCAGAAGAATATGAGCAATACATGAAAAACAATAAAAATTAG
HS-FS-000016-I-01_65_154	GTGTGCAAATTGGATTCAGATGGGGTTATAGAGTGTTGTAGAGCAATTGATGATTTTATTACAGCACTTAGTAATATAAAAAGCTTAAATATGGAAAGATTAAATACTTTAACTAAATATTCTAGTACATGTTCAATCCTTCTTAAAGAGGGGAATTATGAAGGATGTACAATTGTGTATAGAAAGATGTTGGAAGAATTAAAAACATGA
HS-FS-000016-I-01_63_66	ATGAAGAAAAAAATATTAATACCAGTTATTATGTCTTTATTTATAATCTCACAGTGCATAACTTCATTTGCTTTTACACCTGAAAATAACAAATTTAAGGTTAAACCATTACCTTATGCATATGATGCACTTGAACCTTATATAGATAAAGAAACAATGAAACTGCATCATGATAAGCATTATCAAGCTTATGTTGATAAATTAAATGCTGCTCTTGAAAAATATCCTGAGCTTTATAATTATTCTTTATGTGAATTATTGCAAAATTTAGATTCTTTACCTAAAGATATTGCTACAACTGTAAGAAATAATGCAGGTGGAGCTTATAATCATAAATTCTTTTTTGATATAATGACGCCAGAAAAAACCATACCTTCTGAATCTTTAAAAGAAGCTATT…
HS-FS-000016-I-01_80_49	ATGGCTAAAAAAGGTAAAAGATATGCAGGTGCATTACAAAAAGTAGATAGAACTAAATTTTATGATGCATCAGAAGCATTAACATTAGTTTCAGATATAGCTGGAGCTAAATTTGATGAGACAGTAGAAGCACACATTAAATTAGGTGTTGACTCAAGACATGCTGACCAACAAGTAAGAGGTGCAGTTGTATTACCTCATGGAACTGGTAAAACAAAAAGAGTTTTAGTTTTTGCTAAAGGTGAAAAAGCTAAAGAAGCTGAACAAGCTGGTGCTGACTTTGTAGGAGCTGAAGAATTAGTTCAAAAAATACAAGGTGAAAACTGGTTTGACTTTGATATAGTAGTTGCTACTCCAGATATGATGGGTGTAGTAGGTAGATTAGGTAGAGTATTAGGA…
HS-FS-000016-I-01_68_155	ATGGCGCGTAAAAAAAATAAGAAAAAGGATGAGATAAATCCAGATGCATGGTTGGCTACTTATGCAGATACTATAACACTGATTCTTACATTTTTTGTGTTATTGTATGCTACATCAGTTGTAGATATGGAAAAATTTAAAAACATAGCAGATGCGTTAAAAGGTCAGTTTTCTGGGATAAGTATGTTCAGTACAGGTTCAAGTACAAGTGAGAAGTCTCCAATAGAGAGTGTTTTAGTGGATAAAAATGATAAGTCAAATTTAGAACAGGATTTAAAAGATAAAGTTAATAATTCTAACTTACAAAATAGTGTAACAGTCAAAGATGATAGTAGAGGGATTTTACTAGAACTAGATGATTCAATTTTATTTGACTCTGGGATTTCTGAATTAAAAGCA…
HS-FS-000016-I-01_75_96	TTGAATAGAATAGTAGATAGAAAAACAAAAAATGAATTTAGAAAAATCATAGCTATTTTTTTAGTAATTCTTTTCTTGTCTGTATTTATAGGCAGTTTTATATATATAGATAAAACTTTAAGACCGACAATAACAGTTTTAGCAGAGACTAAAGCTCTTGAACTAGCAAATAGGTCGATAAATAAAGCTGTTGCTGAGATGGTAGAAGGAAAAATAAATTATGAAGATTTAATGGATATACAACTTGATAATAATGGTAAAATAACTATGATACAAGCAAACACTATAATGATGAATGAAATTGCATCTGCAATAGCTTTAGAAATACAAGATGAATTAAAAAAGGATAAGACAGCAAGTTCTTACATACCTATAGGAACAGCATTAGGAAGTCCTATA…
HS-FS-000016-I-01_73_40	ATGTCTGGATATACTAATGATGAGTGTGAAATACCTAAAATTAAAAGCTATCCAGGGGCAGATAAAGAAATTGCAAGTGAGATTGACTATAGCATAGTAAAAGGAACGGTTTTATTCGACTTGTACCAAAGAATTATGGATTTAGTTTTATCTATAATAGGACTTGTGATAGGTTTACCTTTAATAGCAATATTTGGAATTCTTATTAAAATAGAGGACAAAGGACCAATAACTTATAAGCAAGAAAGACTAGGAAAATGCGGGAGAAGATTCTATATATATAAATTAAGATCTATGAGAACAGACGCAGAAAAATTTGGCGCACAATGGGCTGAAAAAGATGATCCTAGAATAACTAAGGTTGGAAAGTTTATTAGGAAAACTAGAATTGATGAGATT…
HS-FS-000016-I-01_63_616	ATGATTGTGATTGAAGGTAGTGATAAATTTAAGATTGCAAAAGAATATATTGATGTAGAATATACTCTTTTTAGCAAAGTAACTTTTAGGTATGAAAAGTTGAAATTTAAAGATAATGCTGAATTGGAAAAAATTAAGATGTTTAAATATAAAAATGGCTACATCCCTAATAAATTAAACCTTTCTTTTGGATATGGATTCTCTTCTTATAAAAAGCAAATAATTAGAGAAACTGTAGATACTTTAAGATTGACAGAAATTTTTTCAAGCGAGAACATAGAAGATATTAAATTTATAAAAGATGGTACAAAAAAATTAGAAATTAGCATAGAGAAAGTTGTGAAATTTAAACGTCGAAAAAAAAGAAATTATGTTTGTTGCTATTGCCCTGATATGTAT…
HS-FS-000016-I-01_72_27	ATGAAAGTTAATGAAAATAATATAAATAATATAGATGAAGAGTTAGATGAACTTAGTAGGAAAGTTTACTTAGAGTCACCAGATTTTTGGATAAGTATTTCTGACAAAATAATAGATAAAGTATTTGATGAAATGTTATTATTTTTTGCAGTTAAATATAACTATTTCAATATAGTATGCTTTGCTATTGAAAACAATTATCTGGATTTAAACATGCCTTCAAAAAACAAAAAATACACTAATATAATGGAGCATTTGTTAGATACATCAAAACAGAATGAAGATAAAAAAATTTATAATTATCTTCTAAGCTTAAATAAAGGTAATAACCTAGATGAAAGACCAATTTTAGATGAATTAAACTGTAATATTAGTAGTGATACTTTTGAAAAAAAAGAT…
HS-FS-000016-I-01_75_11	ATGAAAAAAATATTGGGAATATTAGGATTAGTTGCATGTTTAACTTTGGGGACAGTTGGGTGCAATAGTAATGAAGACAAAACAGATGATGGAAAACAAGAAAAAACAACTAAAAGTAGTGATTCAGTAGAGTTAAATATATCGGCTGCTGCAAGTTTAAAAGAAGCAATGGCAAAGATTGAAGAAGAATATAAAAAAGTTGATTCAAATGTAAAACTTACAGTTAACTATGGAGCATCAGGCTCATTACAACAACAAATAGAACAAGGAGCACCTTGTGATTTATTTATTTCAGCAGGTCAAAAACAAATGAAAGCTTTGGATGAAGAGAAGTTATTAGTTTCTGATACTATGAAAGATTTAGTAAAAAATGATTTAGTTCTTATTTCTTCTGCTGAC…
HS-FS-000016-I-01_63_48	ATGATTGAGGTAGATAAATTGTGTAAGTCTTTTACAAGGGTTGTAAAAGATGATAAGAATAAAAGTTCAATAAGAAAGCTAAAGAAAGTAAAAACTAAAAAAGAAGAATTTTTTGCTGTAAATAATGTTTCATTTAAAGTTATGGAAGGTGAAATTGTTGGAATATTAGGTCCAAATGGTGCAGGAAAGACTACATTACTTAGAATGTTAGGTGGCATATTAACACCAACATCAGGAAGTATAAATATTTCTGGATATGATTATTCAATAGATAGAAATTCAGCAAAAAAAGAAATAGGTTATCTCTCTGGAAATACAAAACTATATGGAAGGCTTTCTCCGAGAGAACTTCTAACAACTTTTGCAAGTCTATATGAGATGTCAAAAGAAGATATAGAA…
HS-FS-000016-I-01_63_358	ATGGAAACAAAACAATACTTAATTGACTTTTATAATACTTATGATGAAGATAGTCGACTTGCATTAAAACATGGAATGGTGGAATTTCTCACTACTATGCATTACATTGATAAGTACATAAAATCAGGTGATTGTGTGCTTGAAATTGGCGCTGCAACTGGTCGTTATTCTCACACACTGGCACGTCAGGGATATGATGTTGACGCAGTGGAATTAGTCGAACATAATATAGAGGTTTTCCATAAAAATACTCAATCAAATGAAAATATAAGCATTACTCAGGGTAATGCTATGGATTTATCTGTTTTCCCAGATAATAAATATGATATTACGTTACTGTTAGGACCACTATATCATCTTTATAACAAAGAAGATAAACAACAAGCTTTACATGAGGCA…
HS-FS-000016-I-01_63_268	ATGAGTAAAAAACTTATATTGTTAGTAGAGGATGATAAGACAATAAGAAAATTTATATCTACTGCACTTTTAACACAGGATTATGATGTCAAGGAGGCTATAACTGGAAAAGAAGGTATATCTATTGCTGTCTCATATTCTCCAGATGTTGTTCTTTTAGATTTAGGCTTAGAAGATATGGATGGAATAGAGGTAATAAAAGCTATCAGACAATTTTCAAATATACCAATAATTGTAGTTTCAGCTAGAGAGCAAGATAGAGATAAGGTAGAAGTATTTGATGCAGGGGCAGATGATTACTTAACAAAACCATTCTCCATAGTAGAGTTATTAGCAAGAGTAAGAGTCGCATTTAGACATTCACAAGTAGAAGCTCAACAAAAAGATGATGTTAAATCT…
HS-FS-000016-I-01_73_95	ATGAATCAAAATGAGGAACTTGAATATAAGAAAAATATTCTAAAACTAGCTCTATTTGTAGGGGAACTGATGATAAAAAATGGAGCTGAAACATCTAGGGTTGAAGACAGTGTCCTTAGAATATGCAGGTCAAGAGGGTTTTATCATGTAAATATTTTTACAACTCCTACAGTAATAATTATTTCAGATGAGAAATTTGATGGCTTTTCGTTTATGAAAACGATTCAATCAAGAGGTATAAACTTAAACAAGATTTCTTTATTAAACAGTTTTTCTCGAGAATTTGTTAGTGACAAAGAGTATGATATTGATAATGCCATTGCACGTCTTTATGAAATCCAAGATGTAAAACCTTATCCTTTATGGTTATTTTACTCTTGTACAGGAATTGCATCTGCT…
HS-FS-000016-I-01_63_291	TTGAAAGTAGTAATAATACCAGGGCACACTTTAATTGGAAAAGGTACAGGAGCTGTTGGGTATATAAACGAAAGCAAAGAAACAAGAATACTGAATGACTTAATTGTTAAATGGCTTAAAATAGGTGGAGCTACTGTTTATACAGGAAGAGTTGATGAATCAAGTAATCATTTAGCAGACCAATGTGCTATAGCAAATAAACAGGAAACTGATTTGGCTGTTCAGATTCATTTTAATTCAAATGCTACAACTTCAACTCCAGTAGGGACAGAAACAATATATAAGACTAATAATGGCAAAACCTATGCAGAAAGAGTGAATACTAGGTTAGCTACAGTATTCAAAGATAGGGGTGCAAAGTCTGATGTTAGAGGTCTTTATTGGCTTAATCATACTATT…
HS-FS-000016-I-01_65_178	ATGAATATTTATGCTCATAGGGGGTTTAGTGGAAAGTATCCAGAAAATACTATTCTAGCTTTTAAAAAATGTTTGTATATGGATATATATGGAATAGAACTTGATGTCCACAGAACTAAGGATGGAAAAATTGTAGTTATTCATGATGAAAAGGTTGATAGAACTTTTAATGGACATGGTTTTGTAAAAGACTTTACTTTAAGAAAATTAAAAACTCTAAACTCATCTTTTGAAGGATATCAAAACAATAAAGAATGTAAAATTCCAACTTTAGAAGAAGTATTAATTCTAATTTCACCTACAGACCTTATTTTAAATATAGAACTAAAAACTGACAAAATAAACTATCCCAATATAGAAAAAGACGTTTTAGAGCTTATTTTAAAGTATAATATGAAA…
HS-FS-000016-I-01_68_102	ATGAAAATTGTAGCAGTAACATCTTGTCCTAGTGGAGTAGCACATACTTACATGTCGGCTGAATCACTTGAATTATCGGCCAAAAAATTTGGTATAGAAATAAAGGTTGAAACTCAAGGAAGCTCTGGAATAGATAATGAATTGTCACTTAAAGATATTGATGAAGCAACTTGTGTAATATTGACTAATGATGTTGAGATTAGAAATATGGAACGTTTTAAGGGAAAGAAGGTAGTAAGAATGAGTGTATCTGAGATAATTAAGAAATCTGATGCATTAATTAAGAAAATAAAAGATACTTTTCAATAA
HS-FS-000016-I-01_82_14	ATGTATAAAATTTTAATCGCATGTAGAGCAGGAGTTGGCTCAAGTTTAATGTTAAAAATAAAGACTCAACAAATTATTAAGGAAAATAACTTTCCAATTGAAGTAGAACATGGTTCATTGGATTCACTAAATGGATTCAATGGAGATGCTGTAGAAACATTAATTGATGTTGCTGAAGAATTAAAAAATAAAAATTTGAAGTTTGATATAATTGGGATTCACAATATTGTTGACCGTAATGAAATAAAGACAGCACTAGAAAAATTCCTTGCTTCAAAAGAGGGATAA
HS-FS-000016-I-01_72_67	ATGAATGCAATTATTCATGCAAATGAAAAAGATAATCTAGTTACATGTGTCAGACCTTTAGTTAAAGGTGAAAAAGTTTCAATTGATGGAAAGTCTTACATAGTAAATGATAATATACCTGTCTTTCATAAGATGGCTACAGAAGATGTAAAAAAAGGTGATGTTGTATACAAATACGGTGAAATTATAGGAATTGCAACAGTTGACATAAAAACTGGTGACTATGTTCATGTACATAACATTGAAAGTACACGTGGTCGTGGAGATAAAAAATAG
HS-FS-000016-I-01_77_73	ATGACCTGTGGAGTTAGATTTTGTGGGGGCTGTAACCCTAGATACGAAAGAGGGAAGGCTCTTACAATAATCAAAGAGCACTTCAATGGTAGGGTAGATTTTAGCATAGCACAAGAGAACGTCGAGTATGATTTGCTACTTATAATTGGAGGATGCGCAACTCTATGCGCATCCTATCAACAATATAAAGTGAAAAATGAATGTGTTAAGATGTGGGATTTTAGCCATATAGAAAGAGTTATAAATGTGATTGAATCAGCAATTTGTGAAACTTAA
HS-FS-000016-I-01_81_18	ATGAAAAAAATATTAGTAGCATGTGGAGCAGGAATCGCAACATCAACAATAGTTTGTGACAGAGTAGAAAGATTGGTTAAAGAAAATAATATACACGCAGAAGTTGAGCAATGTAAAATTGCTGAATGTTCAACAAAACAAGAAGGTGCTGATTTAATCGTATCTACTACTATACTACCAACAACTTATGATATACCTACAATAAAGGCAACAGGATATATAACAGGTATAAATACAACAGCATTAGATAAAAAGATATTAAATGCATTGAAGTAG
HS-FS-000016-I-01_63_534	ATGGATAAACCAATGTACAAAAGGGTATTGTTAAAATTAAGTGGAGAAGCATTAGCAGGAGAAAGAGGTTTTGGTATAAATAATGATGTAGTTAATGATATTGCTATTGCTATAAAAAAAATACAAGAAATAGGTGTTGAAGTAGCTGTAGTAGTAGGTGGAGGAAACTTCTGGAGAGGCAGAACCAGTGAAGGAATGGATAGAACTACTGCTGACTATATAGGAATGTTAGCTACAGTTATGAATGCAATGGCGCTACAGGATGCACTAGAAAATATAGATGTTGCTACAAGAGTTCAAACTGCTATAGACATGAGACAAATTGCAGAACCATATATAAGAAGAAGAGCAGTTAGACACTTAGAAAAGGAAAGAGTTGTTATATTTGGTGCAGGAACA…
HS-FS-000016-I-01_63_566	ATGATGAGAAAAATAATTAAAATTGATGAGGGAAAGTGTAATGGTTGTGGACTATGTGTTGAAGCTTGTCATGAAGAAGCTATAGGAATGGTAAATGGAAAAGCAAAACTTTTAAGAGATGACTATTGTGATGGGCTGGGAGATTGTCTGCCAACTTGTCCAACAAATGCGATTTCATTTGAGTATAGAGAAGCAGCAGAATATGATGAAGCTGCAGTAAAAGCAAATATGGAAGCAAAGAAAGCACAAAAGAAAACTTTAGCATGTGGATGTCCAGGTTCTCAGTCTAAGTCAATAAATAGAGAGGTTTCAAATAGTACATCTATAAGCAATGATATAGTAGAGATAAAAGGTTCTCAACTTAATCAATGGCCAGTACAAATAAAATTAGTACCAACT…
HS-FS-000016-I-01_79_9	TTGTATGCACCCATATTTGCTTTGGTACTATTTTCTTTCAATGATTCAAAATCAATGGCAAGATGGAATGGATTTACATGGAAGTGGTATGGTCAATTACTTCAAAATGAGAGTATAATGAGTGCTTTATATTATACTATTGTAATAGCTATATTAGCGTCTGTAATATCTACAATAGTAGGAACTATAAGTGCTATAGGAATACATAAGATGAGAGGTAAGAGTAAGAAATTAATACTAAATGTAAACTATCTTCCTATTTTAAATACAGAGATAGTTACAGCAGTAGCTCTTATGAGCCTGTTTGTATTTGTAAAAATGGAATTTGGATTTACAACAATGCTATTGGCACATATAATGTTTTGTTTGCCATACGTTATACTTTCAGTTTTGCCAAAA…
HS-FS-000016-I-01_68_105	ATGAGAAATATGATAGAAAATCTAATTAAGAACAATACTTATATAGACGATAAAGTAATAATGTTAAGTATGCTTTCATCTGCTAAAGCATCTGCCAATATGTATCTTAATTCTGCATTAACAAGTAGTACACCTGAATTAAGAGCTATATATTCAGCTTCACTAACTCAAATGGTAGAAGGTCACACAGCACTTACAGAATTAAGTATTAATAAAGGATGGGTTAAACCATATGATAAGCCTATTCAACAGTTAACATGTAGTTATAAAGAATCCCAAAATGTTATTGACTAA
HS-FS-000016-I-01_73_92	ATGGAAGAAAGAAAATTAGCACCAAACAATGAGAGGGAAGCTCTCATAAAAAGATTAAAAAGAATAGAAGGTCAAGTTAAGGGGATACAAAAGATGGTGGAACAAGAACGTTATTGTGTTGATATATTGGTTCAAATATCTGCTATAAGGTCTGCTATAAATAGAGTAGGCACAATTATCTTAGAGAATCATATAAAAGGATGTGTAGCAGAAAGCATTAAACATGATGATGCTGATAAAACTGAAGAGATGATAAAAGAGCTTATGGATACTATAAATAAATTTACAAAATAA
HS-FS-000016-I-01_66_209	ATGATAAATGGTAAAGAAAAATTGATAGTTGCAATTGATACTGACGAATTTGATAAAGCTAAAGAACTAATAGACAGATTAGAAGATAGTGTAGACATATTTAAGGTAGGTCTAGAGCAATACGTTGCCACAAAAGGTAAAACAATAGATTATCTTAAAGAAAAAGGGAAAAAAATATTTTTAGACCTTAAATTCCATGATATACCAAATACTATGAAAAGTGCAGTGAGAGCTGCAGTGAGAGATAATGTTTGGTTAATGACAATACATGTATCAGATATGGAAGGAATGAGACAATGTGCACTAATTGCTAGGGAAGAAGCAGAAAGATTAAATATAGAAAAGCCATTAGTAGTTGGAGTAACAGTTTTAACTTCATTAAGTAACCAAGATTTACAG…
HS-FS-000016-I-01_71_128	ATGTCAACAGAAGTACAAATAATGGAGCTTATATCAACTGCAGGAGAGAGTAAATCGAAAGCTTTTGAGGCTTTAAAAAAAGTAAAGTCAAAAGATTTTAAAGGAGCAAAATTGTTAATAGAGGAGGCTCGTAAAATAGATATTGAGGCTCACAGAATACAGACAGAATTAATAACTCAAGATTTAAATGAAGATGTTGAAAGCCCAACAATGAGTCTTTTAATGGTACATGCTCAAGACCACTATATGACTTCTCAGCTAGCAAAAGACTTGATAGAGGCTTTGATATATTGTCTCGATAAGTAA
HS-FS-000016-I-01_63_531	ATGAATAACAACATTATATATGATATAGACTTAAATAACATACCTACTCATATTGCTATTATAATGGATGGAAATGGAAGATGGGCAAAAGCTAGATTTCTTCCAAGAACTGCAGGACATAAGGCTGGAGTAGAAACTATAAGAGATATAGTAAAAGAATGCTCAAAATTAGGTGTTAAGCACTTAACATTATATGCATTTTCAACAGAAAACTGGAAAAGACCGAAACTTGAAGTTGACACACTTATGAACTTATTATCTACATACTTAAGAAATGAAATAGCTGAACTTCACCAAAACAATGTAAAAGTAACTGCTATAGGAGATATAAGTGCTTTACCAAAAACTTGTATAAGAGAATTAAACTCAGCTAAGGAACTGACAAAAAACAATACAGGA…
HS-FS-000016-I-01_76_48	ATGTTTAATAGTATAGCTAGTAAAAAAGTTTATGAACAAGTAATTGAGCAAATACAATATAAAATACTAAATGGAGAGTTAAAAAAGGGGGATAAATTACTATCAGAAAGAGAATTGTCTGAACAAATGAATGTGAGTAGAACTTCCATAAGGGAAGCTATTAGGGTATTAGAGACTATGGGAGTGATAGAAAGCAGACAGGGTGAAGGAAATTTTATATGTACAAATATAGAAAAAACTTTAATAGAACCTTTATCTATGATTTTTAAACTTAATAATGGCACACTTGAAGATATATTAGAGCTTAGAATAATCCTAGAAATTGAGATTGCAAAACTTGCTTCAAAGAGAATAACTTCTTCTGAAGTTATAGAATTGAAACATATAATAGATGAAATG…
HS-FS-000016-I-01_63_373	ATGCTTACACAAATGAATTTTTACCACAATAAAAAAGTAAAAGTATCTATAGAAAATGTATCAAAAACTTATAAAGATATTGAAGTTTTAAAAGATATAAGTATTGATGTTTATGAAGGTGAGTTTGTTTCTATATTAGGGCCAAGTGGATGTGGAAAAAGTACTATTTTTAATATTATAACTAAACTTACAGATTATGATAGTGGCAAAGTGAATATAAATGGTAAATATAGTTATATGTATCAAAAAGATTTACTCTTGCCATATAAAACTATAATAGATAATGTGTCACTACCACTAATTTTAAAAAAAGAAAAAAAGAGTAAAGCTAGGTCAATGGTAAAACCTTATTTTGAGGTGTTTGGATTAAGCGGATATGAAGATAAATATCCTTCAGAA…
HS-FS-000016-I-01_80_57	TTGGCGAGTATAGAAGGAAGAAATCCGGTAATAGAAGCAATAAAAAGTGACAGAGAAATAGATAAAATATTAATTGCAAATTCAGCTAAAGAAGGTTCAATTAAGAAAATAATAGGAATGGCTAAAGATAAGAATATAATTATTCAGTATGTTGATAAACATAAGCTAGATGAAGTAAGTACAAGTCATTCACATCAAGGTGTAATAGCTTATGCAAGTGAGTATAAGTATTATGAATTAGATGAGCTAATAGATTTAGCAAAGAATAAAGATGAAGACCCATTTTTCATTATATTAGATGAGATAACAGACCCACATAATTTGGGTTCAATAATAAGGACAGCAGATGCAGTAGGAGCACATGGAGTTATCATTCCAAAAAGAAGGTCTGTACACATA…
HS-FS-000016-I-01_65_14	ATGTTACTAGAAAATAAAGGCTCTATATTAATAATAACATTGATAATATTTTCTATTATAAGTACTGTGTGCATTATGTGTATAGGTTTAATTTATACACATAATAATATGTTTGAGTTAGGATACAAGGACATTCAACTAAAAGAAATTTCTTTAAGTGGAATAGAAATATCAGTAAGTAATGTACTTTCTTGTGTTGAGGAAGCTATTGATGTATCTAATAATGAAGACGAATTTAGAGAATATTTCTTAGGAAATAATATGATTGAATGTATAAAAAAAATAAAAGATACATCTTATAGTAGTTTAGAAGAACTTTCTTTAAAAGTAGAAAATAATACTATTTATGACAGAGGAGATTTTTTTGAATTTGATATAGAAAGTAATGTTAGAGAAAAA…
HS-FS-000016-I-01_68_42	ATGAAAATACTAGGTATGGATACGTCTTCTATGGCAGCAAGTGTAGCAGTTGTTGAAGATGATAACTTAATATGTGAGTTTACAGTAAACAACAAAAAAACTCATTCACAAAAGCTTATGCCAATGATAGAAAATATGTTGAGTATGAGTGATTTAAGTATAAAAGATATGGATTTATTAGCTGTATGTATAGGTCCAGGTTCGTTTACAGGACTTAGAATAGGTATGGCTACAGTAAAAGCTATGGCCCATGTAAATAATATACCAATAATAGCAGTAAATTCTTTGGAATCTCTAGCAAATAACATAAATTTCTGTGATAGAAAGATATGTTGTATATTAGATGCGCAGAAAAATCAAGTTTATTCAGCTAAATACAAGTTTGAAAATGGAGAGATG…
HS-FS-000016-I-01_63_398	GTGTTGGGGTTTCCAGAAACATTCAAAGCTCTTTCAGACCCTATAAGAAGAGAAATATTGGTTATGTTGAGGGAGAATAAAATGTCAGCAGGAGAAATTAGTGAAAAATTTAATATGACGAATGCTACAATTTCTTATCATCTATCTCAACTAAAAAAGGCAGGACTCATATTTGAAACAAAGTATAAGAACTTTATTTTCTACGAAATAAATATTTCAGTTTTCGAAGAGGTTATGCTTTGGTTTTCACAATTTATGGAGAAGGGAGAAAAAGATAATGAAAAAAGCGATAAATAA
HS-FS-000016-I-01_67_160	ATGAATTCATATAATATTTTGGTGGTAGAAGATGAAAAGGAGATCGCAGATGCTATAGAGATATATCTATTAAATCAAGGATATAATGTTTTTAAGGGATACAATGGATTAGAAGGTCTTAAGGTTATAGAAAACCAAGAAATACATTTAGCTATAGTTGATATAATGATGCCTAAAATGGATGGTATAACACTTACAATGAGGCTTAGAGAAAACTATAATTTTCCAGTAATAATGCTATCTGCAAAATCAGAAGAAGTTGACAAAATAATGGGGCTTAATATAGGAGCAGACGATTATGTAACAAAACCTTTTAAGCCATTAGAACTATTGGCTAGAGTTAATTCACAACTTAGAAGGTACACTAAGTATCTAAACATGGTTGGAAATAAAGAGCAA…
HS-FS-000016-I-01_63_679	GTGGAAAGAACTCAACAATTAAAAGAAAGCTTTATTGCTTCAATTCCTATATTCTTAGGTTATATACCTATAGGTATAGTAGGAGGAATACTATTACAAAAATCTGGTCTTTCACCTTTTCAAATAGCACTAATGGTAACTTTAGTATTTGGAGGAAGTTCTCAATTCATTGCAGCTTCAATGATTTCTACTGGTGCAAGTGTAACATCTATTGTTTTGACTACATTTATAGTTAACTTAAGACATTTTCTAATGAGTTCTAATTTGAACATGTACATAAAAAATAAAAGTCCAAAATTTATATTGCCATTTTGTCATACTATAACAGATGAAACTTTTGCAGTTAATTATGAAAAATTTACTGCTGGAAATTGGTCTGATAGAAATGCTATTTATCTT…
HS-FS-000016-I-01_63_587	ATGATTGAAGCATTTATATTTGATTTAGATGGTGTAATTACAGATACTGCATATTATCACTATATGGCTTGGAGAAAACTAGCCCATAAAGTTGGGATAGATATAGACACAAAATTTAATGAATCTTTAAAAGGCATAAGTAGAATGGAGTCATTGGACAGGATATTAGAATTTGGAAATAAGAAATATTCATTTTCAGAAGAAGAAAAAGTGAGAATGGCTGAAGAAAAAAATAATTACTATGTATCATTGATAGATGAGATAACTTCAAATGATATTTTGCCAGGCATAGAAAGCTTGTTAATTGATGTAAAATCTAATAATATAAAGATAGGTCTATCTTCTGCAAGTAAGAATGCAATAAATGTATTAAATCATTTGGGTATAAGTGACAAATTT…
HS-FS-000016-I-01_71_80	ATGAATCAAGCGCATTATTATCTCATAGGAAACTTTAAGATTAGTGAAACAATACTAGTAAGTTGGGGAATAATGGCCTTTTTAGCGATAGCATCTTATTTTTTGACTAGAAACTTAAAAAAAGTTCCAACTAGTAAAGTTCAAATATTCTTAGAATTTGCAGTAGGTGGTCTTGCTAAAATGGTTACAGATGTTATGGGTAAAAATACAGTAAAAAGAATGCCATATATGATACCATACATAGGAAGCTTGTTTTTATTTTTCGCATGTTCAAATTTAAGCCCATTACTTGGATTAAGGTCACCAACAACCGACTTAGACACAACTGCTGCATGGGCAATGATTACATTTTTTATGATTTATTTTGCAGGAGTTAAATTTAAGGGGTTATCATACTTT…
HS-FS-000016-I-01_63_122	ATGAATAACAATGAAGACAGAATTGACAAATTTTTAGAACTTCAAAGCAAAGGATTTAAATTTGCAGAGATAGCTCAAAATCTAAAGATTAGTCAAAGTACTTTAAGAACTTTTTTAAATAAAAAAGGATATAAGTCAGAAAAAGGTAAATACATATTAAAAGACGAATTAAATTATAATAAAAGTTTGGATAATAGAAACTTGGAAGAAGAGAAAGCTAAGGAGTATGAAAAAAGTAAAAAGAATACTATAAGTAATAGAAAAAAAGTAAGCACCAAAAAAAAGATTTCTAATGAAAAGGCTTTAAGTAAAAGTGTTGAACAAATTGAGTTTAATGATACAGGTTTAAAAAATGCAAAGCGAAAACAAAATGTTAAGCCTAAGAAAGATAGAAAAATA…
HS-FS-000016-I-01_66_215	ATGAAACGGATATTTTTAGTTGAGGATGATAAAGCAATTGCCAAAAATCTTATTCTTTTGCTTAATTCAGAAGGATTTATAGTAACCCATGTATCCACAAGAAGTGAAGCACTTGTAGAGATTGCTAAGAATAAATTTGATTTGGCACTTATTGATATTTCTTTACCTGATGGAAATGGGTTTACGATTTGCACAGAAATCAAAGAAAAGCAAGACATTCCTGTTATCTTTTTGACGGCTTCTGGTGATGAATCAAGTGTTGTTACTGGACTGAATATGGGTGCAGATGACTATATTACTAAACCTTTTCGTCCACGTGAACTGATTGCGCGAATTAGAACAGCACTACGAAAAAGTGGGCGTTTTGGGTCAACTTTTGAAATTTGTGGGCTTTATGTA…
HS-FS-000016-I-01_63_350	ATGAGTATATTAGTGACGAATAATTTAGTGAAACACTATGGAAAAGGTGAGACTAAAGTAAAAGCCTTAAATGGAGTAAGTATAGAAATTGAACGAGATACATTTACTGCTATAGTTGGAACTTCTGGTTCTGGAAAAAGCACATTGTTAAATATTATAGGTGGATTAGATAATCCAACCTCAGGTGATGTAATAATTAAAGGAAAGAACATATCTAAAATAGGAAAAAAAGATTTGACAGTATTTAGAAGAAGAAATATAGGATTTATATTTCAAAACTACAGTTTAATGCCCGTATTAAACACTTATGATAATATAGCTCTTCCTGTTACATTAGATAAAGGAAACCATATAGACCATGAATATATTGAAATGCTGATGAAGACATTGGGAATTTGG…
HS-FS-000016-I-01_66_44	ATGTTTAAAATAATGGTAGTTGAAGATGACGTCTCATTGAAAAATATCATAGCAAAGTGTCTTACTAAATGGGGACATGATGTTCATCAAATAGAAAATCTTGAAAATATAATAGAAGAGTTCAAAAACTATAACCCAGAATTAGTTTTATTGGACATAAACCTTCCATTTTATGATGGTTTTCATTGGTGTAATGAAATAAGAAAAATTTCAAAAGTTCCTATAATTTTTATTTCTTCAAGAAATTCTAATATGGATGTAATAATGGGTGTAAATTTAGGTGCAGATGATTATATACAAAAACCTTTTTCTGTAGATGTCTTAGTAGCTAAAGTTAATGCCCTTTTAAGAAGAACTTATAATTTTGTTGATAATAACTCAAATCAGATTATTCACAAT…
HS-FS-000016-I-01_81_53	ATGTTCAATTTAATAAGAAAAGATTTAATAATAGGAATTAGTTCAGATGGTATCCGTAATTTAAAGTACATATTGCTATTTTTTGTGTTTTATTTTTTCCTTAATTCAATTTCATATTATACAGTAAGTATTGTTGTTAGTTATTTGATATTTATAAATACATTTGAGTGTGATTATGAAAATGATTCAAGGATTTTTATAAGGAGTATGCCAGTTAGTATAGAAGATATAGTTTACTCAAAATATTTATTAGGTGTAGGACTAATAATTTCTGTAACAATAATTGTGTCCTTACTAAGTAAATTGACATCACTAGTGTTCTTTAGAAATATGGTTTTAAATGATGTATTTTTTTCTGTAAATATATTTTTAGCAATTTTGACGATTTTACTGCCTTTA…
HS-FS-000016-I-01_64_136	ATGCCTAGCATGATTATGGAAGTTGTAGGAGTACTATTTATAGCTATTGGATTAATCTTGACATTCATTGAAATAAAAGGAAATTTCCCTTCTTTTTATGGTTTTGGTCAAAATTCTATAGGGAAAAATGCTGTAGGTATTATAGCAGCAGGAATTGCTTTAATTTTCTTTAGAAATGGCATAGATAGCATAGATTCTATAGCTACTTATGGTGTATTTTTAGCAATAGAACTTGTTGTAATAGTTGCATATTTCTTAATAAGAAAAAAATTTACTAAAGAAGATAAACATTTAAGAACTAATTAA
HS-FS-000016-I-01_80_22	GTGTTAAAAAAGGCTGATAAAAATGCTAATAGACTTCAAAGACATAAGAGAGTTCGTAGAAAAATAAGCGGTACTTCTCAAAGACCAAGATTATGTGTATTTAGAAGTGCTAACAATATATATGCTCAAATAATAGATGACACAAAAAGAGTAACTCTAGTTGCTGCATCTTCTTTAGAAGCAGAAGTTAAGAGTGCTGTCAATCATACAGGAAACAAGGAAGCAGCTAAGAAAGTTGGAGAATTAGTTGCTAAAAAAGCTGTTGAAAAAGGAATCACTGAAGTTGTATTTGACAGAGGTGGATACTTATATCATGGAAGAATTCAAGAATTAGCTGAAGGTGCTAGAGAAGCTGGTCTTAAGTTCTAA
HS-FS-000016-I-01_76_44	ATGTTAAAAGGAAAACAAAGGGCGTATTTAAGATCTTTAGCAAATACTTTAAAGCCTACTACACAAATTGGTAAAGAAGGTGTTACAGAGAGTTTCTTAGAGCAATTAGATGGTATGTTAAGAACTAGAGAATTAGTAAAAGTTACTATATTAGAAAATGCAGGTCTTGATACTAAAGAAACTGCTAATGCAGTATGTGAAGCTTTAAGAGCTGAATTTGTGCAGGCTATTGGTTTTAAATTTACTATTTACAAGAGGAATATTGAAGAGCCTAAAATACTTTTTCCAGGACATGAACAGGCGAAAGCAAAGACTAAAAATAATAATGTTACAAAAAAGGGTAAACCAACTAAAAGAGCTGTTAGATAA
HS-FS-000016-I-01_76_80	ATGGAAGATAATAAATTTGGACAAGTAAAAATATCTAATGATGTAATAGCTACAATAGCTGGTTTAGCAGCATTAGAAGTTGAAGGCATAGAAACTACAGCAACATTAACAGATAAGTTGTTAAAAAATAATGGAGTAAAAATACAAATCGAAGAAGAGGATGTTAATTTAGATGTAATGGTTACGATAAAGTATGGAATGTCAATACCAGATACAGCTTTTAAAGTTCAAGAAAATGTAAAAAATACTGTTGAGACAATGACAGGACTGAAGGTTTCTCAAGTAAATATACACATTCAAGGAATCAGCTTTAAGAAGGATAAAGTTGATAAAGAAGAAGCAAAAGCAACTAAGAAAAATTAA
HS-FS-000016-I-01_63_289	ATGGACAATACAATAACGATTAACATAAGTATAATATATGTATTATTAGCTATACTTGCTTGTATTGCTTTAGTTTATTTAATTATTGTACTTGTTAAACTACATAAGATTTTAAATAATGTTGGAACTATGTTAAATGAAAATACTCAAAATATAAATACAACTTTAAATAATCTTCCTAATGTTGTAGAAACTTTTGGAGAAGTAGGAGAAAATATGAAAGATGTAACAGAAGTAGTTACTGAAGTTACAGCAGATTTTCTTGTTACTAAAGACAGTGTCAAATCAAATATGGATGTTATAGTCGATATATTGACTATAATTAAAAATATTTTTCTAGATAAAAAGTAA
HS-FS-000016-I-01_72_58	ATGGATGAGAAGATGATAGAGATATCTTTTGGAATAATTGGATTTGCAGGTGATGCGAAAGGGCTAGCATTTGAAGCAATAAAAGAAGCAAAGAGCGGGAATATAGATAAAGCTAGAGAATGTATTGAAAAGTCGAAAGAATCAATTCATAAAGCTCATAAATTCCAAACAGAATTGATACAAAATGAAGCTAATGGTAATAAAACTGAAATAAGTGTTATACTTATTCATGCACAAGACCATTTAATGACAGCTATGAATTTTCAACAATTAGCAGAAGAATTTATAGATGTATATGAAAGATTAGAAAGTAAGTAA
HS-FS-000016-I-01_65_181	ATGAGCAAGAGTAATGATGTTTTAGATATTGTATTTAAAATTACTGATGGACTTGAATATGAAGTAGCTGAAAATAGTGTTGTTACTATACTTGAAAAACAGGACCATAAAATTCAAAAGTTTTTTAGAAAGTTAAAAGCTAGAATACCTAAATACAAAAAAATAGAACTAGATGAATATTCCAGTTTTGTTTTTTTACAAATTGATGGTCAAAGGACTGTTAGAGAAATAGGCAAGAACCTAGAAGCTAAATATGGAGAAGAATCTCATCCACTTTATGAAAGGTTGTTAGTATTTTTAAATCATATTGAAGTTAATTGTCACTATATTGAAAGACTGGATATATAG
HS-FS-000016-I-01_65_168	ATGGAAATAAAGAGATATGAAGGAACTGGAAGAATGAGTAGAGCTGTAGTTCATAACAATACAGTTTATTTATGTGGACAAACTCATGCTGAAGGAGGAGTAATTGAACAAACAACTGAAGTTTTAGCTAAAATAGAAGATTTATTAAACAAATATGGTTCAGATAAGCAACATTTGCTATCTGTTACTATTTATTTAAGAGATATGAAAGACTTTGAAGCTATGAACTCTGTTTGGGATGCTTGGGTTGAAAAAGGATTTGAACCTGCTAGAGCTTGTGTTGAAGCTAGACTTGCTAGAGAGCATTTGTTAGTTGAAATGAGCGTTGTTGCAGCTACAAAATAA
HS-FS-000016-I-01_63_557	ATGGGCGTTTTAAAAGGAATGTTTTATGTATTTTTATTTTTAGATTTAGTGTCAATATTCTGTTTCTTTTTCAATAAAGGAAAAATAGCATCTAATAAAATTGTGTTTAATGCAATAGGAGTACTTACATTTGTACTTTGTTTTATGCTTTTTAGTTATTATCCTAATAATAATCTTATTGGAAAATTTATTGCTTCTCTATTTTTTATATTTGGAGTTGCAGGAGTTATGTTGAAAGAAAAAAATTTTTTATATGCTAGACTTCTTTTAACTGTAGTTATAGTTTTTTCTACATTAAGATTGTTCGTTATTCAATAA
HS-FS-000016-I-01_76_40	ATGTACGCTATAGTAAAGACTGGTGGAAAGCAATATAAAGTTTCTGAAGGTGATGTATTATTCGTTGAAAAATTAGAAGCTAACGCAGGTGATGTTGTTACTTTAAACGAAGTATTAGCTTGCTCTAAAGATGGAGAATTAAAATTAGGTTCTCCAGTAGTAGAAGGAGCATCTGTTCAAGCTAAAGTTGTTGAACAAGGTAAAGCTAAGAAAGTTATAGTTTTCAAGTATAAAGCAAAAAAAGATTACAGAAGAAAACAAGGACATCGTCAATCATACACTAAGATAGTTGTAGAAAAAATAAACGCTTAG
HS-FS-000016-I-01_70_11	TTGTACAAGGTCAAACTAGATGACTTAGTTAATCATTCGGAAGAAAAAACAGGTATTATAGTACCTCCTAAAGGAAAGTTTTTCTTTGGAGCAGTAGTAGTTGGTGAACGTGGTCAGATTGTCATTCCAAAAGAAGCAAGAGAAGTATTTAATATAAATGCAGGAGATAAATTATTGGTACTTGGAGATGAGGAAAGAGGATTAGGAATTGTTCATCAACGTGATTTGATAAATTTTATAGGTCATATGGGAGTAGTACGTAAAGAAGAATGA
HS-FS-000016-I-01_63_376	ATGGTAATCGCAGACATAGCAGTAATGCCACTAAGACCTTACAAAGGTGAAGAAGAAATGTATAAAGTAGTAGATGCTTGTATTGCTGAAATTGAAAAAAGTGGTCTTAAATGTGAAATAGGAGCAATGAGCACTACTGTTGAAGGTGATTTTGATGAAGTTTTTGAATTATTAAAAAAGGTACATAAAATCCCTTTTAATCTTGGATGTGAAAGAGTCATAACAGTAGCTAGAGTAGATGAAAAAGCTGGAGGTCTGACTATAGATGAAAAACTTAGAAATCATAGATAA
HS-FS-000016-I-01_73_6	ATGTTTAATAAAATATATGAAAAGAAAGAATTTATAGTTTTTCAAGTTAAAAAAGGTTATGTAGTTTATAATACTAGAAAGAGTTTTGAAGAAGGTCATACACATTTAAAGCATTTTGAAGCAGCAAAGACAGCTATTGATTTAGCAATAAATAAAAAGATTCCTAGAAGCAAAGATGGATATTATCTGACTAGTTTAATTCGCATAAGTGATGATGGTTATTACATTGATAAGTTAAGCGAATTGTTATATGTTAGAGAACAAAAAGGTAAAAAAGAAAAGTACTGTAATTCTGGTTATCAGATGTAA
HS-FS-000016-I-01_63_159	ATGATAGAATCAAGATGTGGAATTTTATGTTATGAATGTGGATACAAGGAAAAAGTCAATTGTAAAGGTTGTACAGATATTGAGAAACCATTTTGGGGTGAACAATGTCCTGTAAAATCTTGTTGTGAAGATAAAAACCTTATACATTGTGGTCTATGTGATACATTTCCATGTGAAATGCTTAATCAATTTGCATATGACAAAGAACAAGGTGATGATGGCAAAAGAATTTCTCAGTGCAAAAAATGGGCTGTACTAGCCTTATAA
HS-FS-000016-I-01_73_2	ATGAGAAAAGTAGTACTTTATATTGCCACAAGTTTAGATGGTTATATAGCTGAAGAGAATGGCAGTGTAAGTTTTTTAGACGAGATATCTTCAGAATTTAAGAATGAGCAGGAAGATGATTATAATACTTTTTACGATACAATTGATACTATCATTATGGGAAATTCCACATATGTACAGATTGCAAATGAATTAAGCCCAAATGAATGGTACTATAAGGGTAAGGAATGCTATATATACTCAAATACAATTAATGGGACAACTGGAGAATGTAAAGTATACTAA
HS-FS-000016-I-01_63_644	ATGAAAAAAGCACTTATATCTTTATTAGTTTTATCTTGTTTGTTATTAACTGCACCAGTAAATGAATCTTCTTATGCAGATTCTCAAAAGAATGTTCCTGTAAGCCAAAATACTAAATTGACTCAAGAACAAGCTAAAGAACTTTTAGTAAAATACAACAATGAAGTTGATTACATATATCAAGGAAATGCTAGTGATTTTGAAGCATTAAAAGCTAAAAATCTTAATGGTTATGTATTTTTACCAGATGCAGATGGTGATATTGGTTACTTTGTAAATGAAAATACTTCTGAGATATATTACTTCCACCCAAGTGGATATCTTGAATTAGTTAATCAACAACAAAATAATAAATAA
HS-FS-000016-I-01_71_60	ATGAACTTAAGAAAAAAATTTTCAGGACAGATTATTGTTATCAGTTTATTTTTAGGAATATCAATTTTTAGTATGATGACAGGATTTGTATTTGAGTATACAAAAGCTAAGGAATATAAAAAAGAAATAGCAAGTCTAAATAAACAATTAAAAAAGACTGAAATACAAATAAACAGCTTAAAGAAAGATGAAAAATCATATGAAGGAGACTTAGAGGATATAGCAAGAAAAAGATTGAATATGGTAAAACCAAATGAAACAGTTTATGTAGACATAAATCGTTGA
HS-FS-000016-I-01_65_258	GTGGACAATCTGATTAAGTATATACATAAAAGTAATATAGCTATTGTTGTACTGCATGAAATTTATGGAGTTAATAATTTTATAAAAGATGTTTGTCAAAAGTATTATAAAGGTGGGTATGATGTGTTTTGTCCAGAACTCTTAGGAGAAAAAAGAGTTTTTTCATACTTAAAAGCTCAAGAAGCATATGATTTTTTTATAAATAATGTTAAGTTTGATATTTATAAAAAAGTAGAAAAACTTATAAATGGTTTAAAATCGGAGTATAAACATGTATTTGTAGTTGGGTATAGTATAGGTGCAACTATTGCATGGAGATGTAGTGAAAACTCTTTGTGTGATGGTATAATTTGTTGTTATGGCTCCCGAATTAGAGATTATATGGATGTAATTCCAACA…
HS-FS-000016-I-01_65_177	ATGGATAACTTATTAAATGAACTTGAAGCTTTAAAGAGTAATTTAGATAATCTACCAATAGAAAAAATAGAAAATTATGATTTGAGTAAAACTGCTTTATTTATAATTGATGTTAATAATGGCTTTGCAAGACAAGGTGCATTATACTCTCCTAGAGTAGAGTCTTTAATAAAACCAATTGAAATGTTTACAAAAAAAATATCAAACAAATTAAATAGAGTAATAGCATTTACTGATTCTCATACTCCTAAATCAATAGAACTTTTGAGTTATCCTGTTCACTGTTTGGAAAATGATGTAGAAAGTGAATTGGTTGATGAACTTAAGTCGATAGAAAACCTACAAATTCTTCCTAAAAATTCTACTAATGGATTTTTTGCATTAGAAAATTTGGATTTT…
HS-FS-000016-I-01_63_158	ATGAATAATTACTTAAAATTTGCTACATATCAACTTATAGGTTTTACATCTTCTATACCTAGCCTTATTAAAATTAAAAAGAATCCTGATAAATTTAGCTTAAAGGAAAAATTTGAATTTATGCAAAAACAAGCTAAAAAATCTTTAGATATAGTGAACATAGAGCTTAATATAATTGGTAAGGAAACACTGCCAAAAGAACCACTTCTATTTGTTGTAAATCATTCTAGTATGCTTGACAGCTTCATACTAACAGCAAGTGTAGAAAGACCAATTGGATGTGTAATTGCAGATGAACCAGTTTGGAGAAATATACCTATATTTAAAGAATGGGCAAAATTACTAAGATGTGTATATGTAAACAGAAAAAACAATCGTGAGGGTATAAAGAGTATAGCC…
HS-FS-000016-I-01_85_5	ATGAAAATTGAAGGACTTTTCAATAAATATTATAATTCATTTACAGCAAATGATAAGTATATCTGTGAGTGTATTCTTAATCATAAAGAAGATTGTATTAAACTTTCTATAGATGAATTTGCAGACAAATACCATATATCTACAAGTGCACTTTCTCGTTTTGCTCAAAAACTACAATTACCTGGATATAGTGAATTAAGAGTTATTATACGCTTAAATGAAACAGAAGTAGAATATAAAAATCAAAGTAAACACCAATTAATGGATTGTTATAATAAGGTGATAGATGATATAGAGAAGAAGGATTGTTCGATTATGTTTGAAAGAATGAAAAAGGCAAATCGTATAATCGTCTTTGGAGAAGGTTATTCTCAGGAAAGAGTTGTTAAAGAGATGAAA…
HS-FS-000016-I-01_63_424	ATGAAAAAAATCATATTAGCTTTAACAACTTTTTTATTAGCAATATCTTTAACAGCATGTTCAAGTGCAAAACCAGAAGATACAATTGATAGTTTTTTTAACAGTGCGAAAAAGTTTGACTTTGAAGGCATGAATAAGGTAATGGAAAATAATGACGAAAAATATAAGGATATATTAAAGGAATTAGATACAAAAGACCCAAATGCCCAATATGTTTTAGATTATCTAAAACAGAATGCATCTAAAATCACGTATACAATAAAAGACAGCGAGGTTAAAGGTGATAAGGCTACAATCAAAGTAGAATGTAAATTTATAGATTCAACACCATTACTTCAAGAAATAGTAGCTGAGGCATTTACAAAGATGATTGGTATGAGTTTTTCAGGACAAGACTTA…
HS-FS-000016-I-01_72_42	ATGGGTAATGAACAAAAAATGATTGACAGAATTATAGCTGATGCCAAACAAGAAGCACAAGAAATATTGGATAAAGCTAAAAGTGAAGCAGATTTAAAAGTAAATTCAGCTAATGAAAAAGCTGAAAAGGAAATGGCTTCCTATACAAAGCTTGCAGAGGCAGAAGCAGAAAAAGCGGCTTCTAAGGAAATATCAGGAGCTTATATGGAGGCTAAAAAGCAAATATTATCAAAAAAACAAGAGATTTTAGAAGAGGTAATTTTAGAAGCTAAAAACAAACTTTTAAATCTTAAAGATAATGAATATGAAGAGATTATACTAAACATGATTGAAAAATCAAATTGTACAGATGATTCAGAGATAGTATTATCTAAAAAAGATAAAAAAACATTAAAAGAT…
HS-FS-000016-I-01_88_3	ATGCAAGTTTATACAGGTCCCATAACGAGACTTATAGAGGAATTTTCAAAGCTTCCTGGAGTAGGAAGAAAGACTGCTCAAAGATTGGCTTTTCATATTATTAATATGAATACTAATGATGTGGAAGCTTTATCTAAAGCGATTATAGATGCAAAAAGAGAAATAAGATATTGCTCAATTTGTTGTAATATAACAGATACAGACCCATGTAGCATGTGTTCAAATAAAAGTAGAGATTCAAGTGTTATATGTGTTGTGGAAGATCCAAGAGATGTAGCAGCTATGGAGAGAACGAGAGAGTTTAAAGGACAGTATCATGTATTAAATGGAGTAATTTCTCCAATGGATGGAATTGGACCAGATATGTTAAAAATAAAGGAACTTATCCAAAGACTTGGC…
HS-FS-000016-I-01_65_268	ATGAAATTAAAAAGAACTTTATTTGTAGGATTAGCATTAGTATTAGCTATAGGAATAACTGCATGTGCTAGGGATAATGAAAAACCAAATGAAAATGCAGGAAAAAATCCTAATGAATCTGTAAATAATAATGAAGGATATATGAATTATTATTCAACAAGTTATAATGATTATATAGCAGGTCTAAATAGATATTCTATTTATGATACTCCAGAAAGTATAAACAATCAGTTTAAAGATAAAGAATATCCAGGAAATGAAAAATATCTAAGTGATGTAAAGGCTGCATATAAAGATAGTAGAGATAAAATACAATCATTTGTAACATCTCTTAAAAAAGACGGTAAAACAGAAGATACAGAGTTAAAGAGAATGAATGATGACCTAATAGCTGAAGGG…
HS-FS-000016-I-01_63_119	GTGAAAAGAAAAATATGTGTAAAAACTATTACACTTATAGCTTTTGGTATTTCTATAAATATAATAGGCGCTTTTATAGCTATGGGATTAAGATTACCTGTATACTTAGATTCAATAGGAACTATAATGATAGCTTCACTTTTAGGACCTAAATACGCTGTTGTTACAGGTGTGTTTGGAAGTTTAATAAGTGGAATTACGTTTGATGTGTATTCTCTCTATTTTGCACCAGTTCAAATATCAACCGGATTACTTGCTGGAATAGCATTTAAAAAGAATTTTTTAAGGGGTTTAAAAACTCCACTAGGAGTACTTTTATTTGCTATTCCAACATCTATAATAAGTTCAATAATTTCAGCATTTTTATTTGGAGGTATGACCTCTTCAGGTTCATCCTAT…
HS-FS-000016-I-01_63_21	ATGGCCAGGCGGTTATTTTTAGAAAGGATTGGACTTATATTTTTAGGTTCAGCAATATTAGCATTTGGAGTTTATAATTTTTATTATTTAAACAACATAACAGAAGGTGGAGTGTTAGGTATTTTACTACTGTTAAAAAATTTATTCAATATACAACCAGCAATAGCAAATGTTGTAATAGATGGTTTACTACTTTTAGTAGGATATAAATTTTTCGGTAAAAAATTCCTTATATATTCAATAGTAGCTTCTATAACTTTTTCAGTGTTATATGACTTATTTGAAGCTATAGGACCTCTAGTACCACAATCACAAAATATGCTTTTATCAACTATTTTGGCAGGTGTAACTGTTGGAACTGGTGTAGGTATAGTAGTAAAAGCAGGTTGTGCATCAGGA…
HS-FS-000016-I-01_82_61	ATGAGAAAAAGCCTAAAATTAATAAAAAGTAAGAGTAAAGAGGAAGCTATAAGTAAAGCTATAGCAGAGTTGAATTTAAAAGCAGAGGATATAGAAGTAGAAATACTTGAAAATCCAAGTAAAGGGTTTTTAGGTTTTATAGGTGCTAAAGATGGTACTTATGAAATTTTTGTTATCGAGAGGGAAGTAGATGTAGCTAAAAATTTTATAGAGGTAATGTTGAAAAATGCAAATGTTGATGCCAAAGTCAATGTATCTCAAAAAGATAATTTAATCATGGTTGATATTGAAGGCAAAGAAGCTGCAAGTTTAATTGGTAGAAGAGGGGAAACTTTAGATTCTATTCAATTTTTGACTGGATTAGCTCTTAATAAAATAAATAAAGATTCTCATACAAGA…
HS-FS-000016-I-01_67_201	ATGAAAACAAATAATATGAAACAGGCTATTTTATCATCTGCAACCAATTTAATAGCCAAAAATGGAGTTCAAAATACTAGCCTTGCTGATATTGCAAAAGATGTAAATATAAGTAAAGGTACTTTGTATTATCACTACGCATCTAAAGATGATATTATATATGATATTGCGGATACTCATTTAGAAGTTATAACTAGTGCTATACTAAACTGTGTAAAAAATGTCAAATCAAAAAATTCTCAAATAGAAATGGTTAACTTAATCTTAGAGAAAATATCTACTATAGAAAGTCGTGGTAGGGTACATATGTATCTTATTTGTGAGGCAATTACTTCAAATAATGATTTAAAGGAAAGAATAAGATTAAAATATATTGAATGGAGAACTACTCTTAAATCT…
HS-FS-000016-I-01_63_34	ATGATTGATAAAGAATCTTTAAAAAAATGCTTAAAGTTGTATTTGGTAACTGACTCTGAAATGCTTAAAGGTAGAGACTTTTATAAATGTCTTGAAGATGCAATATCTTCTGGAATAACAACTGTACAACTTAGAGAAAAAAATGCTTCTGGAAGAGAGTTTTTAAGAAAAGCTATGAAACTTAGAGAAATAACTGAAAGATATGGTGTTAAGTTTATAATAAATGATAGAGTGGATATAGCACTTATTTGTGATGCAGATGGAGTACATGTAGGACAGAGTGACATTGATGTGAGAGAGGTTAGAAAGCTTATAGGAAACAATAAAATTCTAGGAGTATCAGCAAGAACTTTAGAAGAAGCTACTTGTGCAAAAAATGATGGCGCAGACTATTTAGGT…
HS-FS-000016-I-01_63_617	ATGAAAAGAAAAGTTCAAGTAAAAAATATTACTATTGGAGAAGGTAGACCTAAAATTTGTGTACCAATTATTGGGAAAAATAAAAAAGATATTATAAAAGAGGCTAAAGAGTTAAAAGATGCATGTTTGGATATTATAGAGTGGCGAGTTGATTTTTTTGAGAATGTAGAAAATATTAAAGAAGTTAAGGAAGTTCTCTATGAATTAAGAAGTTATATACATGATATCCCTTTATTATTCACATTTAGAAGTGTAGTAGAAGGGGGAGAAAAATTAATATCAAGAGATTATTATACTACTTTGAATAAAGAAATTTCTAATACAGGTTTAGTAGATTTAATAGATGTAGAGTTATTTATGGGAGATGAGGTCATAGATGAAGTAGTTAATTTTGCTCAT…
HS-FS-000016-I-01_63_167	ATGGCAGATTGTAATTCATGTCCATCAAAGGGAAATTGTAATAGTCAATCAAATTGTTCTATTGAAAATAACCCTAACAATAAATTTGGAAAAATAATTGGTGTTATGAGTGGGAAGGGTGGAGTTGGAAAATCAACTGTAACTGCTTTACTTGCTAATAAGCTAAACAAAATGGGATATAAGGTTGGTATATTAGATTCAGATATAACTGGACCAAGTATTCCTAGACTTATGGGTGTAAAAAATGTAAAAGCTTATTCTGATGGCTCTTATATTTACCCTGTAGAAAACTCAAATAACATAAAAGTAATGTCTATAAACCTTATGATAGATGATGAGAATGAACCTGTTGTTTGGAGAGGACCTTTACTTGGAGGAGTTGTAAAGCAATTTTATACT…
HS-FS-000016-I-01_63_5	ATGGAGAAAAGAGAAAAGAGGATAATAATATCATCTTTATTAAGTGTATCAATTTTAATGGGTTTGGTAAGTATATATTCTATATTAAATAAAGAAGACATAATTTTAACTGTTAAGGGTCAAGAGCAAAAAGTATCTTCCTTTAAGAAAACAGTTGAGGAACTTTTGGATGAACAGGGTGTAAAGTATAATTCTGAAGATAAGATTAATCCAAGTTTAGATACAGAACTAAAAGATGATATGAAAATAAAAGTTGTTAAGGTAACTAAAAGTAAAAAAGAAGAGATTGAAAAAATTCCATTTGATACAAAGCATGTAAATGATAGTAATTTGTTAAAAGGAAAATCTAAAGTTTATCAAGAAGGTCAAGAAGGAGAAAAAAAACTAGTCTATAATTTA…
HS-FS-000016-I-01_72_79	ATGTATTATGTATATGTGAATGATATAAACATAGCAGTATATGATTTGAATCCGAGTGCTAAAAAAACTGTACTTTTTATACATGGTTGGCCCTTAGGACATAAGATATTTGAATATCAAACAAATATATTGCCAAAACTCGGATATAGAACAGTTTCAATTGATTTAAGAGGTTTTGGTAAATCTGATGCAACATCAGGAGGATATACTTATAGCCAATTAGCAGACGATATTTATAAGGTGGTACATGCTATTGGATTAAAAGACTTTACCTTTGTTGGTTTTTCAATGGGAGGAGCAATCGTACTTAGGTATATGAGTTTATTTAATGGATATGGAGTGTCAAAATTGGTATTAGCTGCAGCTGCTGCACCATCATTTGTACAAAGACCTCCAGAA…
HS-FS-000016-I-01_65_172	ATGAAATTGTATTTAAGTGCTGATATAGAAGGTACTTGTGGTATTGTAAATTGGGATGAAACAAAACTTGAATGTGAATTTTCACAACACTATAGAACACAAATGAGTAAAGAGATAACAGCAGCATGTGATGGAGCTACTCAATCTGGTGTACATGAAATACTTGTTAAAGATGCACATGACAGTGGTAGAAATATTAATCCAAATATTTTACCTGAAAACGTCAAAATACTTAGAGGATGGACCAAAGACCCACTAGTTATGATGGCTGGAATTGATGAAAGCTTTGATGCATGTATATTCACCGGCTATCACTCTGGAGCTACTTGTAATGGTAATCCACTTTCTCATACTATGGATATTGATTATGACTATTTTAAAATAAATGATGAAATAGCA…
HS-FS-000016-I-01_79_37	ATGGAAAAGATAAAGTTGAGTATTGAAAATATAAATAAAAGATATGATAGTCGTATTATATTTAGAGATTTTAATATTGATTTTTATGTAAATGAGGTAAATTGTATCCTTGGAAAATCTGGTTGTGGAAAAACTACACTCTTGAACATAATAAGTGGGATTATTAAAAATGACACCAACAATCTAAATATCAAAGAAAATTTAAATAGAGTAGGAAATAAGCTTGAAGCTAGTTACATATTTCAAGATGATAGACTTATAGACTGGTTAACAGTAGAAGAAAATATAAAGATAGTTGTAAATAAATACTATAATAAAACTCAATTAAATAAAATTTGTGATGAATACTTGGAATTGGTTGGAATTAGTGATTATAAAAAATTCTATCCTCAGATGCTT…
HS-FS-000016-I-01_66_4	ATGAAATTAAAGAAATTATTATCAGTAGCATTGGTGTCAGCAATAGCAATATCAGCAGTAGGTTGTTCAAACAAAGAGGATAAAAAAATACTAGTAGGAGCTTCATCAAATCCACATGCAAAGATATTGGAAGTTGCAAAACCTTTGTTAAAAGAAAAAGGATATGATTTAGAAGTAAAAATATTTGATGATTATGTACTTCCAAATACAGCTTTAGATGAAGGGTCTTTGGATGCTAACTTCTTTCAACATATTCCATTTTTAGAGGAAACTGTGAAGGAGAAAGGATATAAACTTACTTATACATCTAAAGTTCATATAGAGCCAATGGGATTCTATTCAGAAAAAGTTAAGTCATTAGATGAATTAAAAGATGGAGCTGTTATAGCTGTGCCAAAT…
HS-FS-000016-I-01_85_17	TTGTTATTTTTTCATGTTAGTATTCTCTTAGTAATAGATTTAAGGTATTACAAGAAGGGAGAAATTAATATGAAAGATTTAATTCTTGAAACAAAAAACTTATCAAAAAGATATGGAGAACAAATGGCAGTTAACAATGTTTCTCTACAAATTGAACGAAATAGTATATATGGACTTTTAGGACCAAATGGAGCAGGAAAGTCCACAACACTTAAAATGCTTGTTGGTCTTCTTCGCCCAACAGATGGTCGTATTATTTTTGATAGAAAGCCTTGGAAACGAGAATCTCTTGCAAAAATAGGTTCTTTAATAGAATCCCCTGCATTGTATGGAAACCTTACAGCAGAGGAAAATTTGTTAGTACATACAAAAATATTGGGAATACCTAAAGATAAAATT…
HS-FS-000016-I-01_64_1	ATGAGAAAAGTGGCTTTAGTTGTTGGAGGAGGAAGAAGTTTAGGTGAATATTTATCTAAACATTTAGCTAAAGTAGGTTATGATGTTGCTATTGCAGATTTAAATGAAGACAACGCAAAAAAAGTAGCTGAAGAAATAGAAACTGAATTTGGTTGTAAATCTGTAGGATATGGTTGTAATGCCATAGATGAAAGACAGGTTATAAGCACTGTTAAAGCTATTGAAAATGATTTTGATAGAATAGATTTATTAGTGTACAATGCAGGAGTGGCTGTAAGTAAAAAAATAACTGATTTTGGATACAAAGATTTTAAATTTATTGTAGACGTAAATTTAAATGGGTACTTTCTATTTGCAAGAGAAGTATCTAAAGTCATGATAGCAAAAGGTATTGAGGGT…
HS-FS-000016-I-01_85_33	ATGCACATTTCACTAATTCAAGCAGTATTAATAGCAATTTTTTATTATCTTTCTTGGAGTCCGTGGTTGACCTATGTTGGATTTTTTACATGGAATAGACCTCTATTGGCTGGATTTGTAACGGGAATTATATTAGGAGACCCTGTTCAAGGAGCAATTATAGGAGCAGGTATAAATATGATATATCTAGGTTTTATATCAGCAGGGGGAGCTCAGATGGGGGACCCAGCTTTTGCAGGATATGTAGGTACTGCTTTAGCTATAGCATCTAAGCTAGATGTAAGTACTGCAATGGCAATAGCTGTACCATTGGGAACTGTTGCAACTGTACTTTGGATTGGAAAAATGACAGTAAATTCTTTTTTTGCACATTGGGCTGATAGAGAGGTTCAAAAAGGG…
HS-FS-000016-I-01_63_579	ATGGCATATTTTAACTATAACGACAAACAGTGCTACTATAATGAAATTGGGGATGGTACACCATTACTTTTTTTACATGGAAATACAGCCTCTTCCAAAATGTTTAATGATATAATCGATTTTTATAAAGATGAATATAAAGTAATATTAATTGATTTTGTAGGTCATGGAAAATCTCAAATGGTCGATAAATTTTCTGCTGACTTATGGTTTGATGAGGCTATGCAAGTGATATGTTTTTTAGAAGCAATGAACTATAAAAAAGTAAACATAATTGGTAGTAGTGGAGGAGCTCTTGTTGCATTAAATGTTGCACTTGAGAGACCTGATTTAGTGAATAAGGTAATTGCAGATAGTTTTGAAGGAGAAGTTCCTTTAGAGTCATTTGTACAAAATGTT…
HS-FS-000016-I-01_63_13	ATGTCATATTTTCAGTATCAAGGTAATTCTTGTTTTTATAAAGAATATGGACAAGGTAAACCGATAATTTTCCTGCATGGTAATACTGGTTCTTCTAATATGTTTAAAGCACTTGTGCCATTATATGTAGAAAATTTTAGATGTATCTTAATTGATTTTTTAGGTAATGGACAGTCTGATAGAGTTTCTCAATTTTCTCCTGACATATGGCATGATGAAGCCTTACAGACAATAGCACTGATTGAACATTTGAATTGTGGTAAAGTTGGCTTAATTGGAACAAGTGGAGGAGCATGGGCAGCTGTTAATACTGGATTAGAACGTCCCGATTTAGTTGAAGCAATTATAGCAGATAGCTTTGATGGACGTACTCTTAATGATAACTTCATAGATAATCTA…
HS-FS-000016-I-01_81_26	ATGAAAAAAAAGGGAATATTATCAGTATTTAAAAGTAAAAAACCAATTATAGCAATGATACACTTAAAAGGAGATACTCCAGAAGATATCTTTGAAAGAGCTAAAAAAGAGATTACAATCTTTGAAGAAAATGGTGTAGATGGAATAATGTTAGAAAATTACTATGGTAATTATTATGATTTAGAAAGAATACTTGAATATGTATCAAAAGCTAATTTGTCAATACCATATGGAGTAAATTGTTTAAATGTTGATACTATGGGATTTGAACTGGCAACAAAATATAATGCTAGTTATATACAGGTTGATTCTGTAGTAGGTCATGTTAAACCTAGAGACGAAGCTACTTTAGAAGAATTTTTTAAATTACAACGTTCAAAATGCCCAGCGTATTTAATT…
HS-FS-000016-I-01_71_6	ATGCAATTAAAAGATTCAGAAAGAATAGATGATTTACAATTAAAAGGCCTTAAAATTATACAAGATACTAATGGTTTTTGTTTTGGTATAGATGCAGTTTTATTAGCCAATTTTACTAAAATAAAAAAAGATGCCAAAGTAGTAGATTTGGGTACTGGAACTGGAATTATACCTATTTTGATAGCTGGAAAAAGTGAAGCTAAAAAAATTATTGGCGTGGAAATACAAGAAGATGTATATGAAATGGCAACTCGTTCTATAAAATTAAATGGATTAGAAGAAAGAGTTGAGATTATAAATGAAGATATAAAATACATAGACAAAGTCTTAGACATAAATGGTTACCATGTAGTCACATCAAATCCTCCATATATGCATATTGATGGAATAAAAAATCCA…
HS-FS-000016-I-01_63_233	ATGGAATATAGTTATAGTAAGATGAACTTAAAAAAAGGGGATATTGTAGAGGTAAATTTAGAGAAACAAGCCAATGTAATATTGTTAGACCATATAAATTATGTGAAATTTAAAAATCAAAGAAATTATGATTACTATGGTGGATTTGCAAAGAAAAATCCATGTAGAATGAGAGTTCCTAATACTGGAACATGGTATCTAGTAGTAAATCAAGATGGAAATAGTGGAATAGTAAACTTTTCAATCAATACAATTCAAAATTAA
HS-FS-000016-I-01_76_70	GTGGGTGGAGAAACTCATTTTCTGTCATTTGGAAAGGATGAATATAAAATATCTTTGGAGGAACAAGAAAATGCTATAGAATCAGCAAAAGCATCTGATAATTCTGTTAAACTGATTGCATTTATAGATGATGAAATAGTTGGGATTGCAACGATTGATTCTAATCAAAAAGCAAAAGGAAAGCATGTTGGAGTATTAGGAATTGTTGTAAAAGAAAAATATTGGGGAATTGGATTGGGTAAAAGGCTTATGTTAGACCTTATAGAATGGTGTAAATCAAATGGAATAACCAAGAAGATAACTCTTGTCACTAATGAAGAAAATTATAATGCTATAGGATTATACAAAAAAGTTGGATTTGAAGTAGAAAGCATACTAAAAAAAGAATGTTATTATAAT…
HS-FS-000016-I-01_63_673	ATGAATGTAGATTTAATATCATTGGGTTTAGAATCTAATGATTATGAAAGTGTTATTGAAGAATTAGGAAGTATAATGTGTAAAAAAGAATATGTAAAAGAAACATACATAAATGCTGTCTTGGAAAGAGAAAGGACATTACCAACAGGTCTAGATATTGGAGAAATGTGTGTTGCTATTCCACATACAGATTCAAAGCATGTAAATGAGTCTAATGTAGCTGTAGGGATATTGAAAAATCCTGTAAAGTTTAATTCAATGATAGACCCAAAAGATAGACTTGATGTAGAACTTGTATTTTTATTAGCAGTAAAGAACCCAGATTCACAAGTAAAACTGTTAAAAGATTTAATGTCAGTTTTTCAAAATATAAAGTTATTAAAAAATATAAAAAACGCA…
HS-FS-000016-I-01_66_188	TTGGTTAATTTAAATGCAAATAATCTAAATGTAAATATGGTTTATCCTATTTCTTCCACAGCACCCATACGTTTCAGAAGATATACTGTTTCATATTTAGAAAACATGGAAAATATTTATTTAACTATAGCAACATACTTTGATACACTTGGTTTAGGCACAATGAATATCGACAAAGTTTATGGTCAATGGGCTTGGTTTACTGATAATATATATGATTTAAATCTATTTGTTTTTGTAGGAAATTATCCTTATCAAATTGCTAAAAACAGATATGATACATTTGTAGATATTTTGCCAGTAGCTATTACTTCTATTGTCAATGGAGATAGAGTATTTTTAATTTCAAATCCTTGTTTGTTAAATTCAAAAATTACAGTTAGATTTATATCTAGTCAT…
HS-FS-000016-I-01_65_144	ATGAGTACAATATTTCCTTTTATAGGTGTCCCAGAGGATTATATCTTACCTAAAACAGAAGAATTGCCAATCTTTCGTGAAGTGGCATGGGATTTTGAAAAAGATGAACCTATTTTAGAAAAAGGTGACTTTAAAATAATTGAAAAAAAAGAAGCCTTAAAAGTTTGGATATACAAGTGTATAAAGACAAATAGATATGAACATGAGATATACTCTTTAGAATATGGGACAGAGCTTTCAGAACTAATAGGACAAAAATATACAAAAGGTCTTACAGAAAGTGAAGCTAGTAGATTCATAAAAGAGGCCCTTCTAATAAATCCATATATATTAGAAGTAAACGTAAAAAGTGCTAACTTTAACAGAGACGTATTGAGTGCAAATGTAAAAGTATCCACT…
HS-FS-000016-I-01_71_9	ATGGATGTTACAGATTACAGAATCATAGAAATTTTACAGGATGATGGGAGAATTTCTATGAAGGACTTAGGAAAAATAGTTGGTTTAACTTCTCCTGCAGTTTCAGAAAGAGTCAAAAGATTAGAAGAGTCTGGTGTTATAGAAGGATATAAAGCTATTGTCAACCCAGATTCATTAGGCAGAGTTATAAAGGCATTTATTCATATTTCTCTTCCAAGCAATGGATATACAGAATTTATTGAGTCAGCTGCAAAGGACCCTAGGATTGTAGAATGTCACCATATAACAGGTGATGATTGCTTACTTTTAAAAGTAATTGTAAAAGATATGTACGAGCTAGAAAATGTGATTGATACTATAAAGAAAATTGGTTCTACTAAGACCTCTGTTATACTATCA…
HS-FS-000016-I-01_65_151	ATGGGCTTAAGAGACAAATTCGCGCAATCATTTGCTAGATCAAAAACTATGAGTGGCCCTGAGAAAAAGGCTAATGAAATAATGGGTAAATTGCTTCTTAAGAAAGCTATATTACCTATCGTTTTAATGTTCGTGATAATAATCGCTGGAGCTATGCTTAAAATCAATTCTTGGGTTACACTTGGCATAAATTTAGTTATTGCTGTTGGTGCTTTCTTCTACATAAGAAATTCTAGTAAAAAGTATCAGAACTTTAAACCTTATGTTGGCAATTTGATTAGTTTAGAGAAAAAAGGTAAAAAAGAGTACGTTGCTATTATAAAACAAGGTAAGTTACCAGTTAAGTTACAAATAGCTTATGGTGGTGAAGACCTTGAACATGTTAAGAAAAATCAAATG…
HS-FS-000016-I-01_64_247	ATGAGATTTCCAGATGACCCATATTTAGATTATGGACTAATTGATGAAGGAATTAAGTATCTAAAGTTTAAAGTAGATGAGCAAGATTTTGGGGTTGAACTTGAAAAGGTAATAGAAATTACTGGAAATCAAGAAATTATATTTATTCCAGAACTACCTACATATTCTAAAGGCATAATAAATCTAAGAGGAAAAATCATTCCAATAATAGATATGCGTTTGAGACTTAAAAAAGATGAATTAATGACTACAAATTGCATGTATATAGTAGTAACTGAAATAAAGGACTTGGTAGTTGGATTTGTGGTTGATAGAGTTGATGATATAGTAAGCTTAGAAAAAAGTAAAATATCACCTCCACCAAGAGTTACTATAGAATATTCGGATTATTTTGTAAGT…
HS-FS-000016-I-01_70_38	ATGGAACTAAAAATTAGTGATTATAAATTATTATGTAATAAAGGTAGTGGCGCTTTTAACGAAGATATCGTAGGTTTATCACCTTATGGGGCATGGGTACTTGATGGAGCTACAGGTTTAAATAATAAAAATTTAGTCTCTACAGAAAGTGATGCCAAATGGTATGTAAGTTGGTGGAATAGTTATCTTCATGAGAATATGGAAAGAGAAGATAGCTTAAAAGTAATTATTAAAGAAGGCATTGAGGAGATAACAAAAGAGTACTACAAATTAACAGATGATAAAGAAGTAGAAGCAATAGATATTCCTTCTTGTTCATGTTCTATATTAAAGTTTTATAAAGATAAGATAGAGTATTTACTTTTAGGAGATTGTACTTTATTAGTTAACAATAATGAA…
HS-FS-000016-I-01_74_105	ATGCTAACTCCAATTGAGATAGAAAATAAAGAGTTTAAAAAAGGTTTAAGAGGGTATAGAGATGAAGAGGTTGATGAATTTTTAGATATCATCAAGGAAGATTATGAATCTCTATGTAGGGAAAATACAGCTCTTAAAGAAAAATTAGGGTTATATCAAGACCAAGTAAACAAGTATGAAAATATTGAAGAAACACTAAAAGCTACTTTAATAACTGCTCAAAGTGCAGCAGAAGACACTTGTAGCGCGGCTAATAAAAAGGCTAAGATAATTGTTGAAGAAGCTGATTTAAAAGCTAGACAAATTATAGAACAAGCTAATAACCGTGTCATAGAGATAAGAAAAGAGTATGATGCTTTAGTCAAAGAATTTAAGATATTTAGAAATAAATTTAAATCA…
HS-FS-000016-I-01_68_129	ATGTATGGAGAAAATCCTTATAATTCTTATAAACAAAATGCTGTTTTTATGGCATCAAAGGAACAATTGTTACTTATGCTTGTTGATGGAGCAGTAAAATATACCAAAATAGCCAGAGCAGCTATCTTAGATAAAAATACACAGAAAGCGCATAGAGAACTTGTAAGAGTTCAGGATATATTTACAGAACTAATGGTTACATTAGACCAAAATGCAGGACAATGGGCAAAGGATATGTACAAAGTTTATGATTTTGTAAGATATGAACTTTCAAGAGCCAATATTAGAAAAGACATCCAGGTAATAGATAATGTGTTGCCTGTAATAGAACAAATTAAAGACACATGGCATGAAGCTGATAAAAAAAGTAAAGAAGAAAGAAGTAGGTACAAATAA
HS-FS-000016-I-01_68_177	ATGAAAGCATTAGAATTTTTGAACAAGGCAGGAGTTTATTATTTAGCAACAGTTGATGAGAACAATCAAGCACATGTGCGTCCTTTAGGATTTGTTATGGAATACAATGGTAAACTTACATTTTGCACATCTAATCAAAAGGATATGTTTAAGCAACTTATTTTTAATCCAAAGGTTGAACTTTGTTGTATAGACCAAAACCTTAATACTCTACGTATTTTAGGTGAAGCAGTATTTGTTACATCAAAAGAAACACAAGCTAAGGCACTTGAAATAATGCCAAGTTTAGGTCAGATGTACTCTGTGGGAGATGGTAAGTTTGAAATATTCTCTATTGATAAGGCAAAAGTTAGTTGTTGTTCAATGAGTGGTAAAAAGATTGATGTAGAGCTTTAA
HS-FS-000016-I-01_66_183	ATGCTAGATAAAATACCTAATGCAGAGGAAATGACTGCTTTGGTCGGACAATCATTATATAGTGTATGGAATGAATTGTGTGCCTTGATTGATGAAAAGTATGAAATGGAATGTCTATGGAATAAAGGTGGCAAAGCATGGAATTATGAATATAAGTATCGTCGAGGTGGCAAAACATTATGTGCCTTATATGCTAGAGAAAATTGTGTGGGATTTATGATTATCTTAGGTAAAGATGAACGGTTAAAATTCGATACATATAGAGATAATTATTCAAAAGAAGTTCAGAGAATTTATGATGAAACAAAAACTTACCATGACGGAAAATGGCTGATGTTTGAGCCAACAGATACAACTTTGTTTGACGATTTTGTTAAACTTTTGAGGATAAAAAGAAAA…
HS-FS-000016-I-01_68_183	ATGAATAAATATAAGGTAATTATACTGTGCCATGGAACTTGGGGAAAAGTCTTAGTAGAAGAAACAAATAAAAACTTTGGATTGTCAAATCAATATGAAGTTTTATCACTAAGTTCTGAAAAAGATGTTTCTGTATTTATGAAAGAGGTTGAAGAAGTAGTAGATAAAGAAGATGTGAAAATTATAATATCAGATTTATATGGAGGATCTACATCAAGTGTTGCAATAGCTGTTGCTATAAGAAGAGGAATAGATGCAATAAATGGACTTAGCTTACAGACAATTTTAATCGTAGATGAAGAATTAAGCAAAGAAGATAAATTACATACATTACCAGAAAGAATCGTCAAAAAAAATAATAACCTTTGTGTGGATTTAATTAAAGAATTTAAAAAAATA…
HS-FS-000016-I-01_71_15	TTGTATACAGTTGATAGTACTAAGATATTGATAAATATGAACTTAGAGAAACTAGAAAAGATATACTCAATGATAAAAGATACATCAAGTATTTCTATAATTAAAGAACCTAACTTGGCTACAGTAATGGTAAGAGCTAATGAAAGTGTAAAAAATACAACATTTAATTTAGGAGAGATATTAGTTACTGAATGTAGTGTAAAGGTAGATGAAAGCTTGGGTTACGGAATAGTTTCAGAAAACAATAATAAGAAAGCCATTTACTTAGCAGTTATAGATGCAGTTTTACATAGCAATAACAGTAAATTTGATGAGTTAAAGAATTACATAAATAAAAGTGTATATGAAGAGAACTTAAGGTATGAACAAGAGATTATTGATGAATTTAGCTTGATTAAT…
HS-FS-000016-I-01_71_124	ATGTTTAAATTAGAAGAACAAAAACTAAAAGATTTAGGTGCAATAATAACAACTAATGAAATAAAACAACAACCTGAGTTATGGTTAGAGACTTATGAAATATATAAATCTAACAAAGAAAAATTAAATAGATTCATAGATACAATAAGTAATAATCATGGGCAGTTTAGAGTTATATTTACAGGTGCTGGAACTTCAGCTTACATAGGAAATTCAATACTTCCTTACCTTAAGAATAAAAATGACATAAGAAAATACATATTTGAAGCAATACCTACTACGGATATAGTTTCAAACCCATATGATTACTTAAAAAAAGATATACCAACATTATTAATTTCATTTGCAAGAAGTGGAAATAGTCCTGAAAGTTTGGCTGCTTTAAATTTAGGGAATAAG…
HS-FS-000016-I-01_66_9	ATGAAGTTTAAAAAACAAATTAGTTCTATTGTTGTGTCTACTATGCTTGTACTTGGGAGTATGAACCTTTCTTATGCAGATGGTACAAATGTAGTTACACTTGGAGCTAACTTATCAGAGTCTCAAAAGCAGCAAATGCTTAATTACTTTGGAGTAAAAAAAGACCAAGTCTTAGTTTTAGATGTAACAAATGCAGAAGAAAGACAGTATTTACAAGGTGTTGCAACAGAGGGTCAACTTGGAAAAGTTACTATCTCTTGCTCATACGTTGAACCTACTAAAAAAGGAAATGGAATTAATGTTAAAACAGCAAACTTAACTTGGGTAACTAGTTCAATGATTGCTTCAACCCTTACAACAGCTGGTCTTGAAGATGCAAATGTTATTGCTGCTGCTCCA…
HS-FS-000016-I-01_63_153	ATGGAAGAAGAAAAAATTAACTATGCTCTGGAACAGATTCCAGAGAATCAAAAACGTGGTTGGGTAGCTATGTTTTCAGTTTTAGTAGCAATAGGTGTGGATTTATCATCTGTTATTTTAGGCGCTGAGTTGGCACAGAGTATGCCAATGAAACAAGCAATATTGTCAGTAATTGTTGGTTCATTTTTTTCTGCAATTTTGTATACTACATGCTCTTTGGTTGGTTCATCTACAAGTTTATCTACATCTATGATAACAAAGTATGTATTTGGAGAAGCTGGAGCAAAAATATTTTCTCTAGTTATAGGGGTTTCTCTATTAGGTTGGTTTGGAGTTCAAGTAGGTTTCTTTGCACAAAATGCACAGATAATAATAAAAGATATATTTAATTTAGATGTC…
HS-FS-000016-I-01_68_210	ATGTACAGTAATACTTATAATAATGAAAATTTTATGAGAGCAAGAGCATTCATAGAAAATAGTGAATTTAAAAAAGCATATGATTTTTTAAAAACTTTGACTGACAAATGTGCAGAGTGGTATTATTTAACTGGCTTTTCTGCAATGAACATAGGATATTATGAAGAAGGTGAAGACTTCTTAAAAAGAGCAAAATTTATGGAGCCTGAAAATAGTGAATATAGTGATGCACTTAGAAGTTATACACAATATAGAAATGATTATAGCAATAGGGCTGACAATTATAATAGAAGAAGACGTAATGATTTAGATGGATGTTGTTGCTGTTGCTGTGATGATTGCTGTTGTTGTCTAGGTGACGATTGTTGTGAAAATTGTGCTAAGCTTTGGTGTTTAGAT…
HS-FS-000016-I-01_76_92	TTGAAATTAAATGTAAGAATTGCAGACATAAATAATTGGCACGATTTAGTTAGTTTGTCTGTAGATAAAAGTCAGTTAGATTACATAGAAAGCAATGCACTTTCTATTGCTGAATCTAAATTTATAACAGCTTGGGTACCTGTTGGAATATATGATGAAAATTCTTTAATAGGATTTGCTATGTATGGTCGTTTAGAAGATGATAGAGTTTGGCTTGATAGATTTATGATTGATTCAAAATATCAAGGTAAAGGATGTGGAAAAGCATCATTAGATTTTCTTGTAAATCATCTTAAAAATGAATATAACTGTGATGAACTATATCTTAGTATATTCGAAGACAATAAAATGGCTATTAAGCTTTATAAAGATTTTGGATTTAAGTTTAATGGAGAGCTT…
HS-FS-000016-I-01_74_103	ATGGGAACAATAAGAATTGCACTTTATTATCTTTTAGATATAATAGCATGGATGATAGTTATAAAAAGCTTGATGACTTGGTTTCCAAATGGAAGACAAAGTAAAATTTTTAATATTTTGGAAAATCTTACAGAGCCAATAGAAGGGCCAATAAGGTCTATAATGTATAAATATACAAATGGACCTATAGATTTTTCTCCTTTAATTGCAATAGTATTATTGATGTTCCTAAGACAATTAGTATTGGTTATATTCTAA
HS-FS-000016-I-01_90_5	ATGGGATTTAACTTTAGGAAAAGCATAAATCTAGGAGGAGGACTCAAATTAAATTTAGGTAAGAAGAGTGTAGGTATAAGTGCTGGTGTTAAAGGTGCTAGAGTGTCAGTTAATTCAAAAGGAAGAAAATCAGCTACATTGAGTATACCTGGAACTGGAATATCATATACAAAAACTAGTACAAAGAAACGTAAACCTAAATAA
HS-FS-000016-I-01_63_520	ATGATAATAAAACTTACTAAAGACAATTTTAATTTTAGATTTAAACAATATGAAGGTATGTTTTTTCATGCTGAAGTAGTTGAAGGTATGGAATCCATTAGATATAAAATAACTAAGGATAAAGAAGGTACAGAATTAAAAGAATTTGGAAGTACACATATAAAAGATAATATGATATATGTACCTCAGGTAGAAGCATACATAGATTTGAACAGTATAAAATAA
HS-FS-000016-I-01_63_435	ATGGCAATAGTAGTTAACCTAGATGTAATGATGGCAAAAAGGAAAATATCACTTAAAGATTTGGCAGAAAAAATAGATATTACAAATGCAAATTTATCAATTTTAAAAACTGGAAAAGCAAAAGCTATTAGATTTACCACTCTAAACGAAATTTGCAAAGCTTTAGACTGTCAGCCAGGTGATATACTTGAATATGTAGAAGATGAAAATGATTAA
HS-FS-000016-I-01_74_86	ATGGGAATGGATATAGGTTTAAATGAATATACCCTAGCTATAGTTACACTTGATAAGAATATGAAAAATGGTGGAGGTTGTCCAATATTTTATGCAAATGATGAGAAAGACTTACAAAATAAGGCATTGTTGATGTCAAAGTGTGTAGGTGGAATGGTTCATGATATGACAAATGGGACGTTAATCATAGTAAAACATTAA
HS-FS-000016-I-01_71_67	ATGCAAAAGGAAATACAACCAAAATACAATCCAGTTGAAGTGCGTTGTGCTTGTGGGAACACATTTGTTGCTGGTTCAACTAAGGACGAAATAAAAGTTGAAATATGTTCAGAGTGCCATCCATTCTATACAGGAAAACAAAAGAACATAGAAAAAGGTGGAAGAATCGACAAATTCAAGAAAAGATTCAAAATGGACTAA
HS-FS-000016-I-01_64_85	ATGCCTAAAATGAAAACTCATAGAGGTGCAGCAAAGAGATTAAAGAAAACAGGAACTGGAAAGTTAAAGAGAGCTAAAGCTTTTAAAAAACATATATTAACTAAAAAATCTGCAAAAACTAAAATGAACTTAAGAAAATCAACTTTAGTAAGTGATGGAGATGCCAAGAGAATAGCACAATTATTACCATACTAA
HS-FS-000016-I-01_66_160	ATGAAAAAATATGAGTATGTAGAAATTAATTATAATGCGAAAGGAGTTGTATTCCTTTGTACTGATAAACACAAAGAAATTATTGACAGTTATGCAAAAACGGGGTATCACTACGCAGGGTTTGTACCCACAGAAATTGACGCAAAAGGCTGTATGCGAAAGATAGATTTAATTTTTGAAAAAGAAGATTAA
HS-FS-000016-I-01_88_6	GTGGTCGAAGGCGCTCGCCTGGAAAGCGAGTATATGGGTAAAACTGTATCGTGGGTTCAAATCCCACTCTCTCCGCCAGAAACAATGAAAGTAATTAAATATGGTTGTAATTTTGCTGTACTAGATGGGGAGGTAGCGGTGCCCTGTAACCTGCAATCCGCTATAGCAGGATTGAATTCCATCTAA
HS-FS-000016-I-01_80_20	ATGGCTAAATTACAAATAAAGTTAGTTAGAAGTGTTATAGGAACTACTCCTAACCAAAAAAAGAATGTTGAAGCGTTAGGATTAAGAAAAAGAGAACAAGTTGTTGTAAAAGAAGACAATGCTCAAACAAGAGGTATGATAAATAAAGTAAGTCACTTATTAGAAGTAACTGAAATAGCTGAATAA
HS-FS-000016-I-01_71_135	GTGGATGATTTTTCTAAGTTAAAAAGTTTGTATGAAGATGGATATAGATGTATTTATCATGATTGTGTTGATAATAATTATACTATCTATCTTAAGAATTTTTATACGGAAGGTTCAGAAACCATAGAATTAAGTAGTGAATCAGATTTCTCACAATTCAAAGATTATATAGATGGACTCAGAATGTCTTAA
HS-FS-000016-I-01_73_67	ATGGAAAAAGTAGTTAGTATCAAAAATGCAAGTGGATTACATGCTAGACCAGCAGGAATGTTTGTTAAGAAGGCAGCTGAATTTAAATCAACAGTAGAGGTTGTAGCAAAAGACAAAACTGTAAATGCAAAATCAATAATGGGAATAATGAGTTTAGGTTTAGCTCAAGGAGAAGAATTAAAGTTAGTTGTAAATGGAGAAGATGAAGAAGTAGCTTTAGCTGCAATGGTTGAATTAGTTGAAAGTGGATTTGGAGAATAG
HS-FS-000016-I-01_68_66	ATGGCATATAAAATTACTGACGCTTGTATAAGCTGTGGTGCTTGTGAGGCTGAATGCCCTGTTAGCTGTATATCAGCTGGAGACGACGCATATGTTATAGATGCTGGTTCTTGTATAGACTGTGGTTCTTGTGCAGGAGCTTGTCCTGTAGATGCACCTCAACCAGAATAA
HS-FS-000016-I-01_70_16	ATGATTAATGAGAATTTAAAAAGTCTAAGAAAAATCCACCAGTATACACAAGAAGAATTAGCTGAAAAACTTAATGTTTCTAGACAATCAATAGCAAAATGGGAAAGTGGAGTTTCCCAAACAAAAGGATATTACTGA
HS-FS-000016-I-01_82_32	ATGAATATAAGTATAGTAGTAGTAGGTAAAATTAAAGAAAAATATTTAAAATTAGGTATTGATGAGTTCAAAAAAAGGCTTTCTAAGTATTGTAAGTTAGAAATTATAGAGTTGGATGATGAAAAAGCTCCAGAGAATTTGAGTGTTAAGGAAATGGAAATTATAAAAGACAAAGAAGGAAAGAAAATTTTAGGGAAGATAAAGCATAATAGTTATGTTATAGTCTTGGCTATTGATGGTAAGGGTTTATCCTCTGAAGAACTTGCTAAGACTATGAGTGATTTAGCAGTTAGAGGTAATAGTAGTCTCTGTTTTATAATAGGAGGTTCTTTAGGGCTTTCTGATGAGGTTTTAGGAAGGGCTGATTATAGGTTATCCTTTTCTAAGATGACTTTTCCT…
HS-FS-000016-I-01_67_189	ATGGATACTAAAAAATACAAAGATAAATTATTAAAAGAAAGAGAAAAGTTAACTAATTTAGTCGTAGATATGAAAGATAATACCTTGTTTGGAGACACTACTAAACATACTAGTGAAAAATATTCATCAGGAGAATTATCTAGTTATGACAATCATATTGGAGATATGGGAACGGATTTATATATGCAAAATATGCAAAATAGTTTAATAAATCATGAAGAAGGAAGACTGTATCAAATAGATTCAGCATTATCTAAAATAGAAAATGGAACATATGGGTTTTGTGATTTATGTCACAATCAAATAGATTTAGAAAGATTAGATATATTACCTGATACAAATTTATGTAACAATTGTGCAAAAAAAGAAAATGCTTTATTAGGTGATGCAATGCAAAAT…
HS-FS-000016-I-01_71_83	ATGATAAATGTAATAGCAAATAGATATGCCGAAGCCCTATTTCAATTAGGAGAAGAAGAAAATTCAACTGATGTCTTATTCAAAGAACTAGAAAAAGTAGTAGATATGATGACTAAAGTTAGTAAAGATTTCTACAAAGTTTTAAAATCACCATTAGTTTCAAAATCAGAAAAGAAAAACTTGGTAGAAATTATTTTTAGTAAGGAAGTAAGTTCTAACATAAAAAACTTTTTAAAAGTTTTAGTAGATAAAGATAGAATATCATATTTAGAAGATATCGAATTAGCTTATAAAGAATTATTAAATAAGAAAAACAATGTAATTGATGGAGTAGCAATAAGTGCTATTCCAATGAGTGAAACAGATATTAAAGAACTTGAAGTCAAACTTTCAAATAAA…
HS-FS-000016-I-01_71_50	ATGTACGTAGTAGTAGGGTTAGGTAATCCAGGAAAGAAGTATGAGAAGACTAGACATAACGTTGGATTTGATGTTATAGATATTCTTGCTAAAGAATACAATATTAGTGTTACTAAAATAAAGCATAAAGCTTTGATTGGTGAAGGGAGAGTAGGTACTGAAAAAGTATTATTAGTTAAACCACAAACTTATATGAATTTAAGTGGAGAAACATTAATAGATATATATAAATATTATAAGGTTGATTTAAGTAATATAGTAGTAGTATATGATGATATAGATTTAGAAGTTGGAAAGATACGTATAAGAAAAAAAGGAAGTGGAGGAACTCATAATGGCATGAAATCTATAACTAAGTGCCTAGGTTCAAATGACTTTCCAAGAGTGAGAGTAGGTGTA…
HS-FS-000016-I-01_71_113	ATGGTAGTAGGTTATATGAGAGTTTCAACAGCAGAACAAAATGAAGATAGACAATTAGTTACAATGAAAAAGCATAATGTAGAAAAAATGTATCAGGAGAAAATAAGTGCCAAAGATACTAAAAGATCAAAACTAAACGCAATGTTAGATTTTGTAAGAGAAGGAGATACAATAATTGTACATGACTTTAGTAGACTTGCTAGAAGTACTAAAGACTTATTAGAAATAGTTGAGCTCTTAGAAAAGAAACATGTAAAGTTAATTAGTGATAAAGAAAATTTAGATACAAGTACACCTACAGGAAAACTTATGCTTACAATGCTTGGCGCAATATATGAATTTGAGAGAACAAACATGTTAGAAAGACAACGAGAAGGTATCTCTATAGCTAAAGAACAG…
HS-FS-000016-I-01_76_26	ATGAAAAAAGTTTTACTTTGTCTGTTGGGGATTGTGCTTATGACTATAGAAAATAGTATAACAAATTATATAGATATTTTTGGCATAAGCTTTAATTTAGTTCTTATATATGTAACCATAATCTCTCTTTATTTAGATGAATTAGAAGGTGGGATTATAGCAGCAATAATAGGGCTTATTAAAGACATAACCGTTGGTGGAATTTTTGGTGTAAATGCATTAATTTTGTTTATTATTGCATATGCAATTGGATACATGAGAGATCAGCTATATAAAGGTAGTTATATTATTACTTTCGTTTTAATTTTTATAGGCAGTTTAATTGATTCAATTGTCAATATAGGTACATCTAGTATAATTTATCAAAGCTACAACATATCAACACTTTTTGTAAAAGGT…
HS-FS-000016-I-01_75_69	TTGAAGATTACAGTATTATACCAAACAAGAAGTGGAAACACAGAAAGGGTCGCTAAGCTGATAGAAGATGGAGCTAAAAAGGTGGATGGAGTAGATGTAAAGCTTATGAGACTTGATAATATTGATTTAGATTATTTAAATGAAAGTAAAGCAGTAATATTTGGAACACCTACTTATTTAGCAAATACAACTTGGGAAGTAAAAAAATGGTTTGATGAAGATTCAAAAAAAGTTAATTTAGCTGGAAAATTAGGAGCTGTTTTTGCTACATGTGATTATATATGTGGAGGTCCAGATGTTGCGATACTTACTATAGTAGGACATTTGATGGTTAAAGGGATGCTTGTGTATTCTGGAGGTGGTTCTTTAGGAAAGCCATTTATACATTTAGGACATGTA…
HS-FS-000016-I-01_65_37	ATGTATAAAATCGGTGAAAGTGTAATGTATCCAAAAGAAGGAGCCTGTTATATAAGTGGTCTTGTAACAAAGGATATAAATCATCATATACAGAAATACTATGAATTGACTGTTATTTACAATAGTAATCTTAAAATTTCGATTCCAGTTTTAAATGCTGATAAGATTGGTGTACGTCCAATTATGGATGAAAATGAAGTTGAAAACTTTATCCAATCCCTTGATAAGGTTGATTGTTTATGGGTTTTTGATAGAAAAAAACGACTTAAACTATACCATGATAAATTTCATTCAGGAGATGTTTTTGAGATTGTAAAATTAATTAAGATGCTTATGATACAAGATAATTCAAAACAACTATGTAGCACAGATAAGGACTTTCTAAATAAGGCTCAAAGG…
HS-FS-000016-I-01_64_98	TTGGATAAAACTACATTTACAAACAATATACTTGAATCAGAACAGACTTTGTATCGAGTATCTAAGTCTATTCTAGGAAACGACCAAGACTGTGAAGATGCCGTCAACAATGCTATTTTAAAAGCATATGAAAAGTTGGATTCTCTTAAGGAAGAACAATACTTTAAAACATGGCTGATTAGAATAGTCATAAATGAATGTAATTCATTAAGACGCAAACGATTAAAATCTCTATCATTTGAAGATGTCTTCAAAAACAAAAAAATTGATGAAAAAGATGACTATAGCGATTTGTATACTGCTATTCAAAGTCTACCTAAAAAAATTAAAATTCCAATAGTCCTTTACTATATTGAAGGTTATTCAGTAGATGAGGTTAAGGAAATATTAGATATACCT…
HS-FS-000016-I-01_67_106	GTGTTAAATTTTTTCAAGAAAAATAAAAGCTATAAGTTACATGCAGTAGTGAGTGGTAACAGCATTAATATTGAGAAAGTAAACGATTCTGTGTTTTCAAAAAAGTTAATGGGAGATGGAGTTGCAATTATTCCTAATAGTAATGTTGTTGTAGCCCCTTGTAATGGTAAAGTAACTGTGCTTACAGAATCAAAGCATGCCTTTGGTATGGTCTCAGATGAGGGTGTTGAAATATTAGTCCACATAGGAATTGATACAGTTAATTTACAGGGTGAGGGGTTTAAAAATGAAGTGTCTCAAGGAGATACTGTTAAAAAAGGTAGTCCAATAATAAGTTTTGAAAGAGAAAAAATAAATTCTCAGGGAATTGATTGTACAACAATAATAATTGTATTAAAT…
HS-FS-000016-I-01_64_254	ATGTTTGCTAATTTAAATTTAAAGAAAAGTTCATATCAATTATTGGTTATGTCTGTTATTGGAGTTATAATTCTTATAGGACAAAGAATTAGCGTTGGTACATCTATAGTTACAGCTCTTCCTGGTATGGTGATGCTAATATTAGCTGCTATGGCAGCTATGATTATAAAAGATTTATTTCCTAAATCAATCTTTCCAGCTTTTGGATTTGCAACTATAATCGGCCTTTTACTTAGTATGCCATATAGTCCAACATCTGAAGTATTCTTAACTAACACTAATAATATTAACTTTATGGCTATAACTACTCCACTACTAGCTTTTGCAGGAATTTCTGTTGGAAACAAAATAGAAGCTTTAAAAGAAATGTCATGGAAAATAGTTATAATTTCACTTATT…
ERR024642_ST1_123_68	ATGGGAAGTAATGAACTGAAAAAGACTCTTGGCGTATCAGCAGCATTATCAACTGTTGTTGGTTCTGTTATAGGAGCGGGCGTATTTTTTAAACCACAAGCAGTCTATACATTAACTGGAGGAGCTCCAGGTCTTGGTATATTGGCATGGTTAATAGCTGGAATCATAACTATAACAGCTGGTCTTACAGCTGCAGAAGTATCAGTTGCGATACCAAAAACTGGTGGAATGATGGTATATATAAAAGAAATTTATGGAGACAAATTAGGTTTTTTAACTGGATGGATGCAAATTGTATTATTTTATCCAGGGATGATGGCAGCATTAGGTGTTATATTTGGAGAACAAGCATCAGCACTAATTGGTAGCCCATCACTTTTACTTCCAATAGCAATTGGA…
ERR024642_ST1_126_118	ATGATATCTAATAAAATGCAAACTTTAGTTGCAAATAGTTCTGTTATAAGAGCTATGTTTGAAGAAGGAAAGAAACTTTCTGATATTTATGGTGAGGAAAATGTTTTTGATTTTAGTATAGGAAATCCAAGTGTTGAACCTCCAGAGACTATTAAAGCAGTTATAAATGATATTTTAAATGAAGAATCTCCAAATTTAGTTCATGGATATATGAACAACTCAGGATATGAGGATGTAAGAGATGCTATTGCTGAACATATAAATAAAAAAGATGGATTAAATCTTACAAGAGAAAATTTAATTATGACTTGTGGTGCTGCTGGTGGTCTAAATATTATTTTAAAAACTCTTTTAAATCCTGGTGATGAAGTTATTGCTTTTGCACCGTATTTTGGTGAG…
ERR025345_ST1_130_13	ATGCAAGATAAAATATTAAGAGATAAAAAGGCAAATGACCCATGGGCAAGAATGACTACAAGAAACGGATTTAGTGCAGACGAAATAATATCGTCATTTCAAAAAGCTATAAGAAGAAATATGGTGGAAGAAGCTTGTGAATTTGCTTATGAACTATATATATCATCACCAGAATTAGAAGATAAGCTATGGAGAAGGATACTTACAATATCAGTTGAAGATATAGGAATGGGGGACCCATCAGCTGTAATAATCATAAATAATTTAAATCAAGTAAGAAAGGAATATTCATATGCAGATGGAGACAGACCTTTATTTTTCATACATGCAATAAGATATCTTTGTGCATGTGAGAAAGATAGATCAAGTGATTTATTAAAAAATATAATTATAAAAGGA…
ERR026357_ST1_840_1	ATGGGAACAATACTAAGAGGTGGAACTATAATTACCTCTGATAAGACTTATATAAGTGATTTAAGGATAGAAGATGAAAAGATAGTTGAAATAGGAAATAACTTAGAAATAAATGGTGATAAGGTTATTGATGCTACAGGTAAAATTGTAATTCCTGGTGGAATAGACACACATACTCATTTTGATATGAATGCAGGTTCTATTACAACTGCAGATAATTTTGAAACAGGAACAAGAGCAGCTATAGCTGGAGGAACTACTACAATACTAGATTTTGCAGAAGCCAATGAGGGGGAAAACCTACTGCAAGGTGTAGAAGCATATCATAAAAAAGCAAGTGGAAATTGTTATTGTGATTATGGTTTTCATATGACAATTACATGTTTAAATAAAGATACA…
ERR026353_ST1_1147_1	ATGATGAATATTGTCTCAATAAATGGATTATCAAAAGGTTTTGGTAATCGAAAGATAATAGATAATCTAAATTTTACTGTACCAGAAGGGTCAGTCTTTGGGTTTGTAGGTAAGAATGGTGCAGGTAAGACTACAACAATGAAAATGGTACTTGGGTTACTTGAACCAGATAGTGGAACTATAGATGTTTGTGGTGAGAAAGTGACATATGGAAGAACAAGTTCTAATCGTCATGTAGGTTATCTGCCTGACGTTCCAGAGTTTTACAACTATATGAGACCACTTGAATATCTTTCTCTTTGTGGTGAAATTACGGGGCTTTCAAAAAAAGAAATAAAGATAAGGAGTGAAGAGTTGTTATCACTTGTGGGGCTTGGCAATGAAAAGAGACGAATAGGT…
ERR026357_ST1_840_2	ATGATGGATATACTTATTAAGAATGCCATAATAGTAACTGTGAATAAAGAGAGAGAAGTTATTTTTGATGGGGCATTAGTAGTAAAAGATAACAAGATTGCTGATATTGGAAATTCTAAAGAGATAGAAAGTAAATATACTGATGTTAAAAAAATTATAGATGCTAAAGGTAAAGTTTTATTCCCAGGTTTTATAAATACACATAATCATTTATTCCAAACTTTATTAAAAGGATTGGGAGATGATATGGTACTTAAAGACTGGTTAGAAACTATGACATTTCCAGCAGCTAACTATTTAGAGCCAAAAGATACTTATGATGCTGCAATGCTTGGATGTATTGAAGGACTTAGAAGTGGTATAACAACCATGGTTGACTACATGTATCCTCATAGTAAG…
ERR029507_ST1_183_7	ATGGCTTTAAGACAAATAGTTCAAATAGGAGAACCAGTATTAAGAAAAAAATCAAAAAAGGTTGAAAAAATTGATGAAAAGATAATACAATTATTAGATGATATGGCAGAAACTATGTATGATGCAGATGGTGTTGGACTGGCTGCACCTCAAGTTGGAATATTAAAAAGAGTAGTAGTAATAGATATTGGAGAAGAGCTTATAGAACTTATAAATCCTGAAATAATAGAAACATCTGGGGAGCAAATAGATGAGGAAGGATGTTTAAGTGTTGTTGGAGAAGCTGGAAATGTTAGAAGACCAAATTATGCAAAGGTCAGAGCTTTAAATAGAAATGGCGAAACAATAGAGTTAGAGGGAGAAGAACTTTTAGCTAGAGCATTTTGTCATGAGATAGAC…
ERR026357_ST1_899_2	TTGTACAAATTATTAATACTTGATATAGATGGTACGCTTAGGGATGAGGTATATGGAATCCCAGAATCTGCAAAGCACGCTATACGTTTATGTCAAAAGAATCATTGCAGTGTTGTTATTTGTACTGGAAGAAGTATAGGTACAATACAAGATGATGTTTTATCATTAGGGGTTGATGGATATATTGCAGGAGGAGGTAATTACATTCAATATCATGGTGAATTACTTTATAATCAATCTTTTAATCAAAGATTGATAAAGGAAGTTGTTTGTTTATTAAAAAAGAGGGAAGTTGCTTTTTCGATTGAGAGTCAGGAAAAAGTTTTCATGAATCAAAAAGCCAAAGAAATATTTGAAACAATGAATCAGTTGAAAGGAACTAATTCTTGTATAAATAAA…
ERR026850_ST1_126_136	ATGGAAATTTCATATGTACTGAAAGATTGCACATTCAAACACAATAAATACTCAGTTATAGAAGCTGAAACTTGGAAAGAGAAGGATTTGGATATTGTAGTAGCTAAAGGTGAAAAATTTGCATTTCAAATTATGCTAAAAGCAACAGAAGAATTTAATTGTACAATTGATAAAAGCAGTACTATATCATGGAAAGGACTGGAAAATAGAGTAAGATTAGCATTAAATGTGCCTAATAGTTTAGAAAATAATTTTAGTATAAATATATTAGGATATGTTCAAGATGATACAAAGGCATTTGTGAATGATGCTATTTTAAGGGATAAAGATGTGTTAGTAGAGCAATATTTGCCTCAAACATTTTGGATTGAAGGTCAAGTACCAGAAGTTTTTGAAGAA…
ERR030325_ST1_229_21	ATGGACCAAATTAAGCGTTTACATGAATTGCAACAAAAATCATATTTAACTAAAGAAGAATTTGAGGAATTAAAAAATAACACATATATTGAAAGATTTGAATTAAGAGATGAGTGCGATAACTCTTATATTTATACATTTTACACTAACGATAAATGTAATGATATAAAATTTATAAAATCACAATTTATCGTTACACTTATAAAAATTGGTTTCCTATGTGAGTGTGGTGGTGTATTTAGACAAAAGAAAATAGTTGATGAATATGATTACGGATACAATGCTATATATAAGTGTGATTCTTGTGGCAAAGAACTTGATAAAGAAGTAGAAAATTATGACTAA
ERR026357_ST1_764_25	ATGAGAGGAAGAGTAATTTTATTAATATCGATATTATCTATATTTCTTGTAGGATGTTCATTTAATAAAAAAGATGAAATAAATTTAGTAGAGCAAGGAAAAACATATTTAGAAAAACATAACTATAAAAAAGCTATGGAATCATTATCCTCTGCACTGGAAGAAGATAGTACTAATGAGAATGCAAGAGCTATGTATATGCAAGCTATGAGAATGTCAAATATGACGGAGTTTGAAGAATTAAAAAATTATGAGGGTGCAATCAAGGAACTTAAACTTATAGAGAAAATCAAAAATGGTTCCTCTGTTATTAAAGAAGAGGCAACTAAAAAGAAAGAAGAGTTAACTAAATTAGAAAAAGAACAAAACGAAGCAGAGGAACAAAGAAAGAAAAAGGCA…
ERR026357_ST1_766_21	ATGAACAATAAAATACTCGTCGTAGATGATGAGGAAGGTATAATAACACTCTTAAAAGATTACTTTGAAATGAATGGTTATGAGGTTTACACTGCTCAAAGTGGAAAAGACTCATTAAAAAAAATATCCAAAAATCCAGATATCATTCTACTTGATATAAACATGCCTGAAATAGATGGAATTGAAGTTTGTAATAGAATTAGAGATTATGTATCATGCCCTATTCTATTTCTTACAGCTAGAATTGAAAATACTGACAAGATAAATGGTTTTCGTGCTGGTGCTGATGATTATATTGTAAAACCTTTTGATTTAGACGAACTTGGAGCTAGAGTATCTGCACATTTAAGACGTGAACAAAGGAAGTCAAATCAAACTAAAATTAAATTTTATAATGAT…
ERR026357_ST1_822_1	ATGAACAAAAAAATATTATCATTAGGTCTAGCAGTATCATTAATCTTAGTAAACTTCAAAAGTGTAAATGCATCATCAGTAGTAGAAAAAATATACGGTAAAGATAGATATGAAACAGCAGCAAAGATAGCTGATAGACAGACTTATGAAACAGTAATTTTAGTAAATACAGAAAAATCACTTGCAGATGGATTAAGTGCAAGTGGATTATCGGGAGCTACAAAAGCTCCAATACTATTTACACAACAAAATAAGATACCAGCAGACACAAATAGATGTCTAAAAAATATCAAAAAAGCATATATAATAGGTACAGAAGATACTATAAGTAAATCAGTAGAAAAAGAACTAGATTCTAAAAATATAGAAGTCAAAAGAATTGGTGGAGAAGATAGACTA…
ERR026357_ST1_738_38	ATGAGAGTAGTAATAATTGGTGGTGTTGCAGCTGGTATGAGTGCTGCAGCAAAATTAAAAAGAATAAAACCTGAGTATGAAGTTGTTGTTTATGAAAAAACTGAAATAGTATCTTTTGGTGCTTGTGGATTACCATACTTTGTTGGTGGATTTTTTAATGATGCTGATGAATTATTAGCAAGAACACCAGAGAAACTTAGAGAAGCTGGAATTGATTTAAATATATTTAGAGAAGTCGTTGAGGTTGATAGTGAATCTAAGAAAATAAAAGTAAAAAATATAAAAACAGATGAAATATATGAAGATTACTATGATAAATTGATGATAGCAACTGGAGCAAGAAGTATTATGCCTCCTATAAAAAACATAAAATTGAAGAATGTTTCTACATTAAAAAGT…
HS-FS-000016-I-01_76_95	ATGAGAGTCGAGGCCCCTATAAAAGTAGATCGAAAAACCAAAAAACTTGCTAAAAGAGTTGAAAGTGGGGAAATAGCAGTTATAAATCATATAGACATAGATGAAGTTGCTGCAAACTCTTTAGTAGAAGCTAAAATAAAACTTGTCATAAATGCGGCTCCTTCTATAAGTGGTAGGTATCCCAATAAAGGTCCAGGGATATTAACTGAAAATAATATACTAATAATTGATAATGTTGGAGAAGAGTTATTTGAAGAATTAAAAGAAGGAGAAACTATAGAAGTTGTAGATGGAAAGATATATAGAAAAGGAAAATTTTTAGGTGCAGGAGAAGTTTTAGACAAGTATGAGGTTTCACACCAAATAAAGGCTGCCTATGAGAATTTAGCTGTAGAATTG…
HS-FS-000016-I-01_63_374	ATGAATTTTAAAAAGTTAGGAATATTAGGTTTAGTAAGTGTTTTTACATTGGCAACAATAACTGGATGTTCTTCAAATAACAATAAAGACAAAAACAATGATAAAGATACTTCTTCTAAAAAAGTAACTATGGTGCTTGATTGGACACCAAATACAAATCATACTGGATTATTTGTAGCACTTGATAAGGGTTACTATAAAGAAGAAGGTTTGGATGTTGAAATAGTACAACCACCTGAAAGTGGAGCAGAAACTTTAGTAGCAACAGGAAAAGCTGACTTTGGTATAAGCTATCAAGAACAAGTTACTTATGCAAAGACTAGTGAAGATCCACTTCCAATAAAAGCTGTAGCAACTGTTATACAACATAATACTTCTGGGTTTGCATCACCAAAAGAA…
HS-FS-000016-I-01_67_64	ATGTTTAAAAAATGCATTAAAGTAGTAACCTTGACTTTTATATTAGCATGCATTTTACCAGGAAAATCATTAGCTTTGAATCAGGATGATTTTTTAAAGTTTTTAGTAAATTCATCTTATCCAGAAGCTAAAGTCGAAGGAAATGATACAGAAAATAAAAAGAATAATAAAAATAAAGAAACAAGCAAAGAAAATAAGGAAGAAAGTAAAGAAGAAAACACTAAATCTAAAGATGCAAGTAAAGTTGATAATAAAAAAGAGAGTGAAAAAGAATATATAAAACTTTATGTTGGTAAAGAAAATGTTCCAGATATTGAGTCAAAAAATTCAGACACAACTGAAACTAACACAACATCTAGTTCAGATTATAAGGATGATTTAAGAGTAACCAAAGAAAAT…
HS-FS-000016-I-01_63_625	ATGAAACTAAAATTAGATTCATCTAAGTTCAATGAAGGTCTGAATTATCTAAAAAAAGACTACAAGATATTTGCACCAGTTTTAATCCCATTTAAAGGTACTTTTTCAGATACTGATGTTATAAGATACAAGGAGGTAAACGCTTTTGAAGAAATGGAATTTGCTAAGAAAGCAAACTTTTCACCAAAAGAAGTTGTACTTCCCATAAATCAAGTATTGTTTTATTTTACTGAAAAAGAGTTTAAGGAAAGCGATTTAGACAACAAGAAAATTTTAATTTTCTTAAGAGCTTGTGACATAAATGGTATAAAAAGACTTGATGAAATATATCTAAATAATGGTGAAGAAAAAGATTATTTTTATAAAAATATCAGAGATAAAGTAAAGTTTGCACTTGTA…
HS-FS-000016-I-01_72_48	ATGAAAGAATTTATATTTACTTGTCTGTGCATTGTAGTGATTACATTTATGACAAGTTGCATATCAACAACACCACAAACTACTCAAGGAAAAGGAAATAATAAACTTACAATATATGCAGCACTAGAGGAAGAGCAGATAGCTTATTATATGGAAGGTTTTAGAGAAGAGTATCCCAATATAGATGTAGAGATAGTTATGGATTCTCATGGTGTAATAGCTTCAAAACTATTAGCAGAAAAAGATAATCCACAAGCAGATATTATATGGGGATTATCAGCAATGAACATGATAGAGCTAAAAAAAGATGGTGCACTTGAAGCATATAAGCCTAAAAATTATGATAAAGTTGATAAAAAATTTAAAGATACTGAAGATGATGTATCTTGGGTAGGAATG…
HS-FS-000016-I-01_71_127	ATGAATATAGAGTTTTTTAAGAGGTTGTCAGAAGCAGATGGTATAGCATCTAATGAAGAAGAGGTTAGACATGTTTTATTGGAAGAACTAAAGGCTTATAGTGATAAAATTATCTGTGATGGGCTAGGGAGTATCATCTTTTCTAAAATAAAAGATGAGAGTGCACCAAACGTAATGATTTGTGCTCATATGGATGAAGTTGGATTTATGGTGAGAAGTATAGACAAACTTGGTATGATTCACTTAATAACAATAGGAGGAGTAAAACCTCTTGCACAGTTTGTACAAAAAGTTAGAATTACAACAAAAGAAGGAAAGAAAATCCCTGCTGTCATAAATGCTACATATAATAATGGTAAGGCTGAAAATATATATGCAGATATTGGAGCATATACAGAA…
HS-FS-000016-I-01_63_650	ATGACAGGCAAGATAGAAGAAATTAAGGACAAGATAAATAGATTTTGCAACTCCAATTTAAATCAAGAATACAAAGATATAAGCTTTAAAATTTTGCAAAACCTTTTAGATAATAATAAAGAGATAATTCATTCTTCTAGAGCTGATATATGGTCTTCAGCTATACTAAATATAGTTTTAGAACAAAATCTTTTATACAATAAGAAGCATCCACTACATATAACAAAAAAAGAGTTTTCAAAACAAATAGGTGTTTCTTTAAATACTATAAATAATAAATCGTCTTTAATAAAAGATGTTTGTAGTATTGACTTTTTAAATCAAGATACTATAGCTATTTCTAATGTAGAATTTTGGGTAAAAGAGACCAATTCCAAATCAAAGTCTGTAGATTTAGAT…
HS-FS-000016-I-01_77_89	GTGAAAGCAGCAGTATTACATGGCACAAATGATATGAGATTTGAAGATATAGAAATAAAACCATGTGAAAGTGATGAAGTAAAAATAAAAGTTATGGCAGCAGGAATATGTGGGTCAGATCCTCCAAGAGTATTAAAACATTGGAAATATCCAGTTCCAGCTATACCAGGACATGAGTTTTCTGGAGTAATTGCTGAAGTTGGTAAGGATGTAAAAAATGTAAAAGTTGGAGATAGAGTAGTTGCAATTCCTTTTATACCTTGTAATGAATGTGAATATTGTAAAAGAGGATTATTTTCATTGTGTGATGACCATGGAATGTTAGGAGCTAAAAGTTTTGGAGCTTTTGCAGAGTATGTAAATATAAAAGCTACAAATGTACTTCCAATAGGAGATATG…
HS-FS-000016-I-01_68_193	ATGGAAAAGTCAAAAGTATATTTTTGTGATTTATACTCAAATTCGCAAAATAAAAACGTACCAAACAATGTAAGAAGATTATTTGATGAAGCAGGATTCAAAGATTTAATAGAAAAGAATGACCAAGTCGCAATTAAACTTCACTTTGGAGAAAAGGGAAATACTACATATATGAGTCCTGTGGCAGTTAGACAAGTGGTTGATAAGGTTAAAGACTGCGAAGGAAAGCCATTTTTAACAGATACAAATACACTGTATACAGGGAGTAGAACAAATTCTGTAGACCATCTTACAACTGCTATAGAAAATGGATTTGCTTATGCAGTTGTAAATGCACCAGTAATAATTGCAGATGGATTATATAGTAGAAATTATGAGAATGTAAAAATAGACAAAAAA…
HS-FS-000016-I-01_64_214	ATGGCTTGCTTTGTAGTAGTTTTTACAATTTTTATATTAGCTATATGTAACTTTGATTTTGGATTTGATAAAGTAAATAAGAATAATTCTAATATAGATAGTGCTAAATCGAAACAGAGTGAGTCTAAAAGTGTACCAACTTCAGCAGAAAAGGATAAATTAAATAGTAAAAGTAAGAATGAAGAAGATGACACAGAAGATGATTCATATGTAAGAAAAACTATTGGAGTATTGTTAGATACCGAAAACTTAAATAACGAATCATATAATAATAATGTACTATCAGCCTTAAAAAGGGCTGATGAAGATTTTGATGTTAGGATAAAACTTGAAAAACCAAAGACTTCTAAAAGTTTTAAAGAGAGTATAGAAAAACTACATAAGTATGAACCAGATTTG…
HS-FS-000016-I-01_80_93	ATGAAAGAGAACATAGTCATGAAATCAAGAGTTAGGCTAGCTAGAAATTTAAATAACTATCCATTTCCAAATAAATTAGATAAAGAATGTGCCATGGAAATAATAGAAAAAGTAAAAAATGCGTTTATTAATTCTAACTTAGAACAAAAAGAAGAATTTGATTTCTATAAAATTGAAGATTTAGACCAATCTAAAAAAATGCTTATGGTTGAAGAACATATAATAAGCCCAGATTTAGCAGAAAATGATAAAAGTGCAGTTATAGTAAAAAAAGATAAAACTATAAGCATAATGATAAATGAAGAAGACCATATAAGGATACAAACTATATGTGATGATTTAAACTTAGAATATGCATATAGTGTAGCAAATGAAATAGATGATTTGTTAGAATCAAGT…
HS-FS-000016-I-01_66_216	ATGTTTCGAAATAGAGAGTTTCGAAAATTTGCTATTTTATTCTTATTAATTACTATTCTCACTGTAGCCCTGGGATTTGCAATCAGTATTATGACTGGAATACTTTCTATTGTTTCTGCCACTACCTTTGGAATAGCATTTTTTGTGTTTACTAAAAATCGATACAAAAGTATTGCACAGATTTCAGAACAAATTAATCTTGTGCTTCATAATGCTAACCATCTGTATATTGCTGAATCAGATGAGGGTGAGCTTTCTATTCTACAAAGTGAAATAACTAAAATGACGTTACGTATTAGAGAGCAAAATTACGCACTGAAAAAAGAAAAAGAACACCTTGCTGACTCACTAGCTGACATAGCCCACCAGCTTCGCACTCCTCTTACATCAGTAACTCTT…
HS-FS-000016-I-01_65_163	ATGGGATTCAAAGTTGAATTAGGAGGTTTCCAAACATTAATACAAGACAGAGGTAGAGTTGGCTATGGTCAATATGGTGTATCTGGATGTGGAGCAATGGATGAGTATGCACATAGAGTAGGAAATATATTAGTAGGAAATTCTGAAGATGAGGCTTCTTTAGAAGTTTTAATGTTAGGTCCTACAATTACCTTTGATGAATATACGCAAATAGCAGTAACTGGGGGAGATTTAGGGGCTAAAATAAATGGAAAAGAAATTCAAAACTGGAGGTCATATCAAATAAATCCAGGTGATGTATTATCATTTAGAGGTGTGAAATCAGGTGCTAGAGCCTATGTGTCAATAGCTGGTGGAATAGATGTTCCACTTGCAATGGGAAGTAAGTCAACTTATACA…
HS-FS-000016-I-01_65_231	ATGAATAAAGTTGATAAAGAAAAGATACAACATGCAGTAAGAGAAATACTAGAGGCAATTGGAGAAGACCCAGATAGAGAAGGTCTAATCGAGACTCCAAATAGAGTTGCTAGGATGTATGAAGAGATATTCTCTGGTCTTAGTGAAGAACCAAGAGACCATTTAAAAGTTCTTTTTGCAGATGAAAAACATGAAGAATTAGTATTGGTAAAAGATATTCCATTTTATTCATGTTGTGAGCATCATCTAGTTCCTTTCTTTGGAAAAGCTCATATTGCTTATTTACCAAAAGGAGGAAGACTTACAGGGCTTTCTAAACTTGCTAGAGTAATAGATACATTGGCAAAAAGACCACAATTACAAGAAAGAATCACTAAAAATGCTGCAGATATAATAATG…
HS-FS-000016-I-01_69_39	ATGCAAACTAAGATATTGATAATAGATGGAGACAAGGATAATTGCCAGAAGCTAAAAGGATTTCTGGAGGAAAAAGAAATAAGTATAGATTTAGCATATAATTGTGAAGAAGCTATTGGAAAAATATTTAGCAATAAATATGATTTAATATTTTTAGAAATAATTCTAACTGATGGTGATGGATGGACTCTTTGTAAAAAAATTAGAAATGTAACTACTTGTCCAATTGTTTATATGACTTATATAAATGAAGAACAAAGCATTTTAAATGCTTTAAATTCTGGCGGAGATGATTACTTAATAAAGCCTCTAAATTTAGAAATATTATATGCAAAAGTAAAAGCTATTTTAAGAAGAATGAACTCATATGTAAATAATAATGAAAATAATACAAAATTA…
HS-FS-000016-I-01_69_8	ATGAAATTTAGCAGAAGTATACAAGCTATAGACTCTCATACAGCAGGTGAAGCAACTAGAATAGTTGTAGGTGGAATACCTAACATAAAAGGAAATTCTATGCCTGAGAAAAAAGAATATTTAGAGGAAAATCTAGATTATTTAAGAACTGCTATAATGTTAGAGCCAAGAGGACATAATGATATGTTTGGTTCTGTAATGACTCAACCTTGTTGCCCAGATGCTGACTTTGGAATAATCTTCATGGATGGTGGTGGATACCTTAACATGTGTGGCCATGGTACAATAGGAGCTATGACAGCAGCTATAGAAACAGGTGTAGTTCCAGCAGTAGAGCCTGTAACTCATGTAGTTATGGAAGCTCCAGCAGGAATAATAAGAGGAGACGTTACAGTTGTA…
HS-FS-000016-I-01_69_52	ATGTTAGTACAAGCTACTATGTTAGCTATTATAGCAGGAGTTGGTATACTAGATGGGCGTATATTTGGTCAATCTATGTTTGATAGGCCAATAGTTACAGGTATGTTAGTTGGATTAGTTTTAGGAGACATAAAATCAGGAATTATGATTGGTGCACAGCTTGAATTAATTTGGATGGGAATTGCAGGGATAGGTGCAGCTACTCCTCCAGACGTAGTAACAGGAGGTGTATTGGGTACAGCTTTTGCTATATTATCAGGTAATGGTGCAGAAGTTGCTTTAGCAGTGGCAGTGCCAGTAGCAGTATTAGCACAATCTCTTGGAGTATTAGTTAGAATAATAAATTCGTACTTTTCTCAAAAGGCAGTTTTCTATGCTAAACAGGCTGATTTTAAGAAA…
HS-FS-000016-I-01_65_208	ATGAATATATCAAGAAAAGCTATGAAAATAATAGAATTAGCACAAAAAATTGCAAATAAGAGAGGTATTTCAGTAGAAGAAGCTTGGAGTGAAGCAGTAACAGAATATAAAAATAAATACGAACATATTGCATAG
HS-FS-000016-I-01_70_139	ATGAATGTAGAAAACGAATTACTTAAAAACCTAGATAGATTGCATACAACAGAGTTAGGCGTTGTAAGAATTAAGAAAAATCTTTCTTTGGAGACAAATGATGTAGTGAACTGGTGTAAAACTAAAATAGAATCTCCAAATGCCATTATTAATAGAAAGGGAAAAAACTGGTATATAAGTGTATATGATTGTATTATAACAGTAAACGCTCACAGTTATACAATTATTACAGCTCATAAAGAAAAGAAATGA
HS-FS-000016-I-01_69_82	ATGAAAATAGGCATAGTAAGCGACACACATATGATGATTAAAAATATGGAAAAAACAATACCATATTTGAAAGAATGTGACCTAATAATTCATGCAGGAGATAACTTTACTGATTCAAGATATATTCATAGCATGACTAATGTAGGTATTATTGCAGTTAAAGGTAATTGTGACTTTGATGCTGTTGAGGAAGAAGTTGTCTTTGAAGTGGCAAATAAAACCATATTCTTATGCCATGGAGATAAGTATGGTGTAAAATATGGAACTAATATGTTAGAAAAAAAGGCAACTGAAGTTGATGCTGATATAGTTATATTTGGCCATACCCATACCCCATTTAGAGAAATTAAAGATGGTGTACTTTACATAAATCCTGGAAGCACTTCACTTCCAAGAGGA…
HS-FS-000016-I-01_69_171	ATGTCTTTTTCAACTGAAACCAAAAATGAACTAGCAAGAGTTATATCTGGGAATGAATGTTGTAATATAGCTGAATTATCAGCTCTAGTTAAATCAGGGGGAAGTATACAAATCGTTGGATATAAGAAGCTAAATCTAAAGATAACAACAGAGTTAAATTCAATAGCCCGTAAAGTATTTAAATTATTAAAAAAGAATTTTAATATCAATACTACAATCTCAGTAAATAAGAATCAAATGCTAAAGAGAAATAACAGTTATGTATTAATGGTAACAAGCGAAATGGGTTCAGAAATGTTATTAAAAAAGTTAGGTATACTTGAAGATAAAGAAGGCTTTTTTACTATAAACAAAATTTCAGAGAACTTAATTAAGCATGAAGGATGTAAGAGAGCTTTC…
HS-FS-000016-I-01_69_3	ATGAGAGATATAAGAAAAGAATTAGTGGAAATGTTAAAGGCAGAAGTTAAACCAGCAGTAGGGTGTACTGAACCAGTAGCCTTAGCTCTAGCATGTGCAAAGGCAAAGGAATTATTAGGAGAAGAAATAGTTGAAAATCGTATGTTAGTTAGTCCTAGTATCTACAAAAATGGCATGTGCGTAGGTATACCAGGTACTGAAAGATTAGGATTAAAAATTGCAGCAGCTCTAGGTATAGTAGGTGGCCATTCTGAAAATGGATTAAGTGTGTTAGAAACTCTAACAAAAGAAGAAGTTAAAATAGCTGAGGATTATATGGATAATACTCCACTATCAATAACACCTGCTGATACAAGAGAGAAAGTATTTATAGAAGTTGTGTTAAAAGGAAAAAATCAT…
HS-FS-000016-I-01_70_140	ATGCAAAATGTTGTAGAATATATCTATCAAGAATGGTTCCTTAATTCAAGTTGCCAGTTTAATGAAAATAATTTATATGATTTTGTAAAATACGGAGAAAAAACTGATAAGAATGGTTTGAGTGAAATTCAGTTTTGGGTTCCAATCATTTAA
HS-FS-000016-I-01_68_61	ATGAAAGCAGAAAAAACAAGTATATATCCAATTATTAAAAATAATTTAAACAAAATATCAATTGTTGAATATAAAAAGGGTCAAAGATTTGTAGCATCAGATAAAGACTTACAAGAAGTGTTCTTTATAATAGAGGGAGTTGCATTAGTGGAGTGTACTACTAGAGGAGGAAATAAATTTCTTGTTGACATTGTACCTGAAAATGAATTTATAGGCAAAATCAGTTACATATATGAACATAATTTGAAATGTGATATATTTGCAAAGACCAATATAAAATTATTTCGATTTGAAAAAAATGTATTTGAAGAGTTTTATCTCAAACCAGATTTTATTGCACTATTTCACAGAAAATGTACAAGAAGAATATATGAATTATATAAAACCAGAATGGTAAGA…
HS-FS-000016-I-01_67_164	ATGATTAAATTAGCACCATCAATATTATCAGCAGATTTTGCAAAATTATTAGAAGATGTAAGAAAAGTAGAAAGTGCAGGATGTGAATATCTTCATATCGATGTAATGGATGGACACTTTGTACCAAACATTACATTAGGACCACTTGTAGTCAAAAGTTTAAAGAAAGAAAATATAAATATGGTATTTGATGCTCATCTTATGATAGAAAATCCAGACCAGTATATTGAAGAATTTGTAAAAGCAGGATGTGATATAATAACTGTTCACCAGGAGGCTTGTGTTCATCTACATAGAACTATACAAAATATAAAATCACATGGAATAAAAGCTGGTGTAGTACTTAATCCAGCTACACCAGTAGATACGATTAAACATGTACTACCTGATTTAGATATG…
HS-FS-000016-I-01_64_73	ATGAAGCAATATATAGTCATTGGGTGTGGGAGATTTGGAAGTTCAGTTGCGTCTACTATGCATCTTTTAGGACATCAAGTAATGGCAATAGACAAAAATGAAGATTCAGTTCAAAGTATATCTGACAAGGTAACCCATTCACTTATAGTGGATGTTACTGATGAGCAAGCGTTAAGGTCATTAGGTTTAGGTAACTTTGATGTAGCAGTAGTTGCAATAGGTTCTGATATAAGGGCATCTATAATGGCGACTCTTATAGCCAAAGAAATGGGTGTAGAGTTGATAATATGTAAGGCAAAGGATGAATTACAAGCTAAAGTGCTTTATAAAATTGGCGCAGATAGAGTTGTATTTCCAGAAAGAGATATGGGAGTAAGAGTTGCACACAATTTAGTTTCG…
HS-FS-000016-I-01_72_99	ATGAATTTAAAAGATAGTAAAACTAAAGAAAATTTATTAAGAGCTTTTGCAGGTGAGAGTCAAGCTAGAAATAGATACAATATTTCTGCATCTGTAGCAAAAAAAGAAGGATTATATATAATAGAGTCTTTATTTAATTACACTGCTGACCAAGAAAAATCACATGCAAAACAATTCTTTTCTAAATTAAAAGAATTTGCTGGTGAAAATATAAGTATATCAGGAGCATACCCTGTAGATTTATATGACAAGACAGCACAACACCTTAAAGCTGCACAACATAATGAGCTTCAAGAGTGGGATGATGTATATAAAAACTTTGGAAAAACAGCACGTGAAGAAGGATTTGAATCTATAGCTAAGTTATTTGAAAATATAGCTGAAATAGAAAAAGTTCAT…
HS-FS-000016-I-01_63_188	ATGCCTAAATCGTATTCTGATAAAGAAAGAGAGTATATAATAAAAAGACTTAAAGAAGAAGCAAGATTGTGTATGGAGCAATATGGTATTAGAAAAACTACTGTTGATGAGCTTGTAAAACGGGTAAAAATACCAAAAGGAACTTTTTATCTATTTTTTCAATCAAAAGAATTGCTCTTTTTTGAGGTATTGAGAGATATACATGACTCTATACAAAAAGAAATCTTATATGAGATAAATAGAGTAGATGAAAGTATTACATGTGAACAATTGACAGATATATTTATGAAATTCTATAGGATGGTTGATAGTACTTCAATTTTAAATCTCATGATAAATGGAGAATTTGAGATATTGGTGAGAAAGTTACCAGATTCTATAATTGAAGAACACTTTAGA…
HS-FS-000016-I-01_63_6	ATGAAAATAGTCTGCTTAGGAGACAGTTTAACGTATGGATTTGGAGTATCACGAAGTAATTCATGGACAAACATTGTAAATGAAGAGACTCGATTAGAAATAGTAAATAAGGGTATAAATGGTGATACAACAAGTGGTATGTTAGCTAGGTTTAATGAAGATGTTGTAAAAAACTCTCCTGATATAGTTTTTATAATGGGTGGCACTAATGATTTTATTGCTGGTGCGGGAAATGAAATTATTAATTCTAATATAATGGCTATGGTGCATCAGTCATATTCAAAAAATATTATACCTATAATAGGTATACCATTAAAACCAGATATTCCAAATGTTAGGGAAGATTGGAGTTGTTTTACTGATTTTAATATAGTATCTCAAAACTTAGAATCATATAGT…
HS-FS-000016-I-01_66_247	ATGATGAACACAAGTGCATCAGTAAGAAAAGTAAATGTAAGAAAGATGACTATAATAGGAGTACTATCAGCTATTTCTATTATGCTATCTATGACTCCATTGGGATTTATTCCAGTTGGACCTACAAAAGCAACTATAATGCACATACCAGTTATTATTGGAGCTATTATGGAAGGACCAATAGTTGGGGCAGCAATAGGATTTATATTTGGGATATCAAGTCTCTTAAATGCTATAACAAACCCAACAGTAACATCTTTTGTTTTTATAAATCCATTAGTTTCAATATTACCAAGAGTTATGATAGGTGTATTAGCTTATTATGTATATCAGTTAATAATTAAGGCTACAAATAAGGTATACATATCAGGTTTAATTACAGGGGCAATAGGTTCTCTG…
HS-FS-000016-I-01_70_148	TTGAAAGAAAAAGTACAAAGAGAAAAGAAGATAACTAATGGCAAGAATACTAAAATATTGACAAATGATGATATAATGAAATATGAGATAGCCTCAGAACTAGGTCTTATGGATAAAGTTGGTGAACGTGGATGGGCAGGACTTACAGCTAAGGAAGCAGGAAGAATTGGAGGTATGCTTACATCACGCAAAAAGAGGCTTAAAAAGATTGTGGAGGAGCAGAATAAAAAGGATGAGTCAATATAG
HS-FS-000016-I-01_69_190	ATGAAAAAGCAATTTAATAAAGCATATTTATATATAACACCTGCTATTATAGGAACTTTATTGTTTATAGTCTATCCAATAATTAAGACGATATCTCTAAGCTTCAAATCTGGTAGTCTTCTTAGTTCAACCTTTGAAAATGTAGGCTTAAACAATTATACAGAACTTTTAAAGAATCCAGAGTTTATACAAACTATAACGAACACTGCAATTTATACTTTTTTTATGGTGACTATATCTATATCACTAGCCATAGTACTTGCTGTTTGGCTAAATAAAAATTCTATAATACACAATTTAACGCAAAGTATAATCTTTACACCACATGTAATTTCACTAGTATCTGTAGCTGTATTGTGGCTTTGGATTATGGAGCCACAATATGGCTTTTTAAACTGG…
HS-FS-000016-I-01_69_21	ATGAAAATCTATATTTCTAACTACTTATCAAAGAGTATTAGCATAGTTGATTATTCTACACTTGAACTAGAAAAAGAAATAGTATTAGAAGATAATATATATCCACACCATTTTTGCATAGAAAAAGAAAAAAATTTAATATACATACCTAGTTCAAGTAATGGGATACTTTATGTCTTAGATTTAAGTAATGATAAAATAATTGATACTGTCTCTATAGGAGGAAGTCTTAGTCAAGTTGTACTTAGTGATAATGAATTGTTTGTGGCAAATGAAGATTCTAATAGTATATATGTACTAGATAAAAACACATTAAATCCAATAGGAATTATTGGAGTTGATAATATGCCACATGGATTTGACTTTGATAGAGAAAGTAAAAAATTATATGTACCGTGT…
HS-FS-000016-I-01_80_55	ATGTTGGTAGCAAAAGAAAAAAGTTATGAGTTAGTGGACAATTGTCAGCAGGATGAGTATAACATTGTATTAAGAGCAAGTGAAGGGGATAAAATAGCACTAGAGTACATTATTACTAAATACAGAAATTTTGTAAAGGCAAAAGCAAAGTCATATTTTTTAATTGGAGCAGATAAAGAAGATATAATACAAGAAGGAATGATAGGCCTTTATAAGGCAGTTAGAGATTTTGATGGAAGTAAGACCAATTCATTTAAATGTTTTGCGGAGATATGTATAACAAGACAAATAATAACTGCTATAAAAACTGCAACAAGACAAAAACATATACCTTTAAATTCATATGTTTCTTTGAATAAACCAATATATGATGAAGAGTCAGACAGAACACTTTTAGAT…
HS-FS-000016-I-01_85_23	ATGATTATAAAAGCAAAACAATTATCAAAAATATATGGTTCTAATAACAATAAAGTTATAGCACTTAATAATGTAAATTTAAAAATAAACTCAGGTGAATTTGTTTCTGTAATTGGACCTTCTGGAAGTGGAAAAAGCACACTTTTACATATTTTAAGTGGATTAGATAATCCTACCTCTGGACAAGTGTTACTTGATGATAAAGATATATATAAACACACTGAAAAAGAACTATCTGCACTTAGAAGAAAATCCTTTGGATTCGTCTTTCAACAATTTAATCTTTTACCTGTTCTTACAGCATCTGAAAATATTTCAATGCCTGTACTTCTAGATAAAAAACAACCTGATAAAGACTATTTAAATGAAATTTCATCATTACTTGGAATTGCAGATAGA…
ERR277254_ST1_130_105	ATGAACATAAAAATAGCAAAAAATGCTGGCTTTTGTTTTGGAGTAAAAAGAGCAATGAAAATGGCATGGGATGAAGTTGAAAAAAATGATTCTGGCATATATGCTTTAGGTCCTCTTATTCATAACAAGCAAGCAGTAGCAAAATATGAAGAAAAAGGTCTTAAGACTGTGAATGAAATTGATACAATACCAAATCATGAAAATATGATAATAAGGTCTCATGGAGTTCCTGAAAATATATATAAGGAAGCCAAAGATAAAAAATTAAAAATTGTGGATACTACATGTCCATTTGTAAAGAAAATACATACAGTAGTAAGTGAGTATCATAATAAAGGCTATGAAATAATAGTTATTGGAGATATGAAGCATCCAGAAGTTATAGGTATAAATGGATGG…
ERR339886_ST1_108_109	TTGGAAGAAAAATTTTATATAATATTAACCAAAATTGGTAGAGAAAAAATAGCAAATGCAACTGCACTAGGAGAGCTTGTTGGATTAACCAAGTTTCAAGTTGGAGATAGTAATGGAGAATATTATGAGCCAACAGAGGAACAAACTGCTTTAAAGAATGTAGTTTGGGAAGGAAATATAAATTCTCTAAGAATTGATGAAAAAAATCCTAATTGGATAGTTATAGAGACTATTTTACCAGGAACAGTTGGTGGATTTATGATAAGAGAAGCTGCTGTTCTGGATAATGAGAATAATATAATAGCTATAGGTAAGTATCCAGAGACGTATAAGCCACGTGCTGAAGATGGCAGTATTAAAGATTTGGTTGTAAAAATGATTTTACAATTGTCCAATACT…
ERR347651_ST1_111_2	ATGAGAAAAGTAAGAGTAGGAATATGGGGATTTGGAGCTATGGGAATAGGTATGGCTAATATGATTCTAAAGAAAGAAGGTATAGAAATAGTATCTGTTTGTAGTAGAAGTACTTCAGGGAAAAGTATGTATGATGTTTTAGGAATTGAAAGAGGAGAAAGACCAGAAGTTATTATCAATAAAAATTATGAAGAAGTTTTTAGAGAAAAAAGTGTAGATGTTGTTTTGTTAGCAACTGATTCATTTACTAAAAAGGCTTTTGATAAAATAATTTTCTTATTAAATAGAAAAATAAATGTTATATCAACAGCAGAACAAATGGCATATCCACAAGCTGATGATGCAGATTTAGCTAAAAAAATGGATGAAGTTGCAAAGGAAAATGGAGTAAGTATACTT…
ERR339889_ST1_117_106	ATGAAAAGATTATTTGCGTTATTACTTACTTTAAGTTTAGTTATATTACCATCAACTTTAGTATTTGCTAATGAAAAAGCTGAAAATGATTCAATTTATGCTGAGGCGCCATTAGTGTTTCAAAGTAATGAAAAAGCATATACACATGGTAGTGGAGGAACTGCATATATAGGTTATATGTCAAGTAAACATCTTAATTGGAGGATAACATCTTCAAAAGGAATAGTTATACTATTTTCAGGAACTGTTGAGATTAGAAATTCAAAAAATATGCTTGTATCATCATATCCAATAAGTGGTGGAGGATCTTCAACTATATCTGGACAAATAGATGTTAAATATCTTAAAAAAGGGGATTATAAAGCTATATTGAAAGGTACAAGTACAACAGGAGGCGGA…
ERR030325_ST1_251_18	ATGAAACATGAATTAGTACTTGTAATAGATTTTGGAGGACAATATAATCAGTTGATAGCTAGAAGAGTTAGAGAAAACAACGTATATTGTGAAATACTTCCATGTACTGCAAGCATAGAAAGAATAAAAGAAAAAAATCCTAAAGGGATAATATTTACAGGCGGTCCAAATAGTGCGTATTTAGAAGATTCTCCAACAATATCAAAAGAAATATTTGAACTAGGAGTACCAATACTTGGAATATGCTATGGTATTCAAATAATGTCTCATGTATTGGGTGGAGTTGTAAGAAAAGGTAATAAACAAGAAAAGGAATATGGAAAAACATCTATAACTTATGGAAAATCATCATTATTTGAAGGAATAACTACAAATAGTGTATGGATGAGTCATACAGAT…
NODE_3_length_252651_cov_121.603_69	ATGAGTAAAGATGTAAAGGTAAAGCGTAATAAGAAATATGATACATTTAGTATAACTATGGAACTTGAGAGACCTTTACTTTATGATGAGGTTGAGAACAAAGATGATAAAAATAATAATAGAAAATTTAACATAAAGAATAAGATATTTAAGGGAATAGGTATACTATTTGTATTGATTTTGCTTGGCTTTTTCATATGGATAAATAAAACATATGAACCTCAAAAGCTGGCAAAAGAAGCTCTAGTCAGCAATAGTAAAGTTGAAGTAACTGTAAATGAAAACATTTCATTTACACCAAAAGGAAGAAAAGTTTCTAAAGGTTTAATTTTGTATCCAGGAGCTAAAGTAGAAATAGAATCTTATGCTCCACTTGCAAGAAAAATAGCAGAAAGTGGA…
NODE_6_length_230349_cov_41.6997_70	ATGAATTATGTAGTGTTAGGGGCTAGTGCAGCTGGGATAAATGCAGTAAAAACATTAAGAGAATTAGATAAAGATTCAAATATAGTAGTAATTTCTAAAGATGAAAACGTATATTCAAGATGTATGTTGCATCACGTTATATCTGAACACAGAACTTTAAAACAAATAAATTTTGTTGATGAAGATTTTATGGAGCAAAATAATGTAAAATGGATTGCAGGTAAGACTGTTAAAGGTATAGACATAAATAAAAAGGTAGTTCAAACAGAAGACATTACTGTAAATTATGATAAACTTTTAATAGCTACAGGTGCATCTTCTGCTATTCCTCCTATAAAAAATTTAAGAGATGGAAATTTTGTATATTCTGTGAGAAACATAGATGATATTTATAAAATA…
FAAW01000002.1_135	ATGGAAAAAAGAGATACTTATTTATGGTTAAAATCAATTGGTGGAATAACAACAAAAACAATTGAAATAATAGAAAATGAAATAGTAAATATTGAAGATATATTTAATTTTTCTGAAAAAGAAATATATAATTTAAAAAATATAAGCTTGAATATTAGAAAAAATATAGTAAAATATAGAGGTTACGCTTATTTAGAAAATATAAAAGAACTACTTTACAAAAAAGCGATTAAATATATTTGTAAATATGATAAAGAATATCCTGAAAATTTAAAGAATATATACAACGCTCCAAAGTTATTATTCTACAAAGGTGACATAGGTTTAGTTAATAATAATTTTAATATAGCTATAGTAGGTTCAAGAAAACCTACAGCCTATGGAATTAATTGTGCAAAA…
FABB01000187.1_8	GTGTATAAGAGACAGTTAGTAGCATGTGGAGCAGGAATAGCAACATCAACAGTAGTTTGTGACAAGGTAGAGAGATTAGTTAAGGAAAATAATATACAAGCAGAAGTTATACAATGCAAAATAGCTGAATGTGCAACAAAGCAAGAAGGAGCAGATTTAATAGTATCAACAACTATACTACCAACAACTTATAATATACCAGCAATAAAAGCAACAGCATATATAACTGGAGTAAATACAGCAGCATTAGATAAAAAAATATTAGATGCTTTAAAATAA
SAMEA3467906_ST1_301_25	ATGGTTTATAGTTGTGCCTCCCATATAGGAAAAATAAGAAAAAACAATGAAGACTATTGTGAGGGAGAAGTTATAGATACAGAACATGGTCCAATAGGAATATTTGCCATAGCTGATGGAATGGGTGGACATAAAAAAGGTGAAGTCGCCAGTAAATTAGCAGTAGAAAATATAATTGATTTTCTAAAGGAAAACTTATTACAACATGATAATGTAAAAATAGACTATATAGATGATATATTAAAACAGGCTTATAATAATGTAAACTCAATTGTGCACAAAAAATCTATGGAAGATATAGAATTTGAAGGAATGGGAACTACATTAGTTACGGCTATAGTGTATAATAATGTCTTATATGTGGCAAATGTTGGAGATAGCAGATGTTATTTGTTAACA…
ERR467551_ST1_129_10	ATGGCAAGATATACAGGTGCATCATGTAGACAATGCCGTAGAGAGGGAATGAAATTATTCCTTAAAGGTGATAGATGTTATACAGACAAATGTGCTATAGTAAAAAGAAACTATGCTCCAGGTCAACATGGCCAAGGAAGAAAGAAAGTTTCTAACTATGGATTACAATTAAGAGAAAAACAAAAAGTTAAAAGAATATATGGAGTTTTAGAGACTCAATTTAGAAATTTATATGAACGTGCTGAAAATATGCCTGGTAAAGCAGGTGAGAACTTATTAAGTTTATTAGAGAGAAGATTAGATAATGTAGTTTACAGAATGGGACTAGCATCTTCTAGAAAAGAAGCTAGACAATTAGTGACTCATGGTCATTTCACTTTAAATGGAAATAACGTAGAC…
MPEP01000016.1_84	ATGAATACAGAAGTTAATGTTAAAGCAACTACGATTAGATATGAAAAGATTTCATTTTTTGAAAGAATTTCTTATGGTTGTGGGGATTTGGGGTGCAATATCATATACTCAGCTATGTCAGCATTTTTGCTGTTTTATTATACTAATTATGCAGATGTTAGTGCAGCAGCTGTAGGTAGTATTATGCTTGTATCTAGGATACTGGATGGGTTTAGTGACTTAACAATGGGAATTATAGTGGATAGAACTAAATCCAAATACGGTAAGGCTAGGCCTTGGATTTTGAGAATGGCGATTCCTTTTGCTATAGCAGCAGTATTATTATTTTCTGTTCCATCAAATCTTGGTATCACTTCTAAATTAATTTATATTTTTATTACATATAACTTAGTTTCTACT…
ERR928295_ST1_97_174	TTGAACAAACTATATTCTATTTTATTAAAACAACACGTTGGTGGTCCAGATAAGCCAGTAGTAAGTGTTGGAGATGTAGTAAAAAAAGGAACTCTAATCGCAGAACCAACTGGATTAGGGGCAAATATTTATGCCAGTGTTAGTGGAAAAATAAGTGAAATAAATGACCAAGCGATAGTAATTGAAGCTGATGAAGTACAAGAAGATACTTTTGAACCATTAAAAGGAGAAGGTATACTTGACTTAATTAAAGAAGCTGGAGTAGTAGGAATGGGTGGAGCAGGATTCCCTACTCATGTAAAATTAAACATAGATTTAAATGGTGGAACAATATTAGCAAATGCAGCTGAATGTGAACCTTTATTAGCTCATAATATAAAAGAAATAGAAGAAAGACCA…
FADC01000021.1_57	ATGAAAAAAGTAAAACTTATATACAATCCTAATTCAGGTGAAAAAAAGATATTATCAAATTTAGACACTATCATAGAATTATATCAAGAAAAAAATTATTTATTGATACCCTATAGATTAACTATTAAAGAACCTGTAAAGAATGCATTTAAGGAAGTTGATAGTTCTTATGAACACATATTGATAGCTGGTGGAGATGGTACTGTAGATTTAGTAGTAAATGCAATGAAAGAATTAGACATAAAAATTCCAATTGGAATTTTGCCTACAGGAACTGCAAATGATTTTTCAAATGCTCTTCAAATTTCATTTTATATAAAAGAAGCTATAAATGAAATCATAAATTCAAAACCAAAGAAAATAGACATAGGGAAAGTCAATAATAAGTACTTTATAAAT…
FADR01000004.1_43	ATGCATGCATGGGAGTCTATTCAAATTACATTGGATTTAATAGAAGCAAATTTATCAGAAGAAATATCAATTAATGAATTAGCAAATAAAGCAAATTTATCACCATTTTACTATCAAAGACTATTTAAAAGATTGGTAAATAAGACTGTAATGGAGTATATAAAGCTTCGTCGTCTTGCAAGAGCTTCTGAATACTTAGCAGAACATAAGAATCGTATACTTGATGTAGCTTTAAATTTTGGATTTGCTAGTCATGAGACATTTACACGTTCCTTTAAAAAAGCATATGGATTAACTCTAGAAAAATATAGAGCAAATCCAGTAAAACTCAATCACTTTATTAAGCCAGAATTAATTTTAAATTATGCTATGGTTGATGAAGGTGTTCCACTGATTGCA…
MPFW01000005.1_83	ATGAAAAAATATGCAAAGGTAATAGTTAGAAGTAATACTATATATACAGATAATTTATTTACATATCAAATTCCTGTATTTTTATCTGATGTAATAAAAATCGGGCACAGAATATTAGTACCATTTGGAAAAGGTAATAAACCAACAGAAGCCTTTGTATTTCAATTTACAGATAGCTTAGATGAAAAAATAAAAATAAAAGAAATTATTGATATATTAGATGAAAATCCAATATTTAGAAAAGAAGATTTAGAGTTGGTTTATTGGATGAAAAATAGATATTTGTGTACTTATATAGAATGTATAAATTTGATATATCCAAAGGGATACAAATTAAATAATTATAAAGTAGTCCTATTAGGTGAAAGTTTAAGTGGATTAAATGAGATTGAATTGAAG…
FAOJ01000001.1_132	ATGAATAATAAAGTTAAGGTTGCAGTATTAGATACAGGAATAGACAAAGAACATGATTACTTAAAAGATAATTTAGTTGGAGGAATTGCTTTTGAATGTATGCATGATTATATCTTTATATCAGATAAATTTGATGATGAAGATGGTCATGGAACTGCTTGTGCATCAATAATAAAGAAAGAGTATGAAGATGTAGAGTTATTTGTAATAAAAATTTTGAGAAAAGATGGTATTACAAATATAAAAGTTCTTGAAGAAGCATTAAGATACCTTTTAGACACTAACATAAGATTAATTAATTTAAGTTTATCAGTCATAGGAGTAGAGAGTGTTAAGGGCTTATTTGAAGTTTGTTACGAATTGTTTAGAAAAGGAAAAATAATAGTATGTTCACTCGCT…
FADY01000084.1_12	ATGTCTATACAAAAACTTCTAAGTAAAGCTCGTAAGGCTATACAAGATTTTGATATGATACAAGAAAATGATAAAATTGCGGTTGGACTTTCTGGTGGAAAAGATAGTTTAACTCTACTTCATATACTTAAAAGTTATCAAAGATTTTCTCCACAAAACTTTGAATTGATAGCCATAACATTAAATACTGGAGGTGTTGATAATTCTCCACTAGATAAATTGTGTAAAGAAATAAATGTTCCTTTTTATGAATTTCAAACTGACATAAAAGAAATTGTATTTGATATAAGACAAGAAAAAAATCCTTGTGCATTATGTGCTAATTTAAGAAGAGGTGCTTTGAACGATAATGCTAAAAAACTTGGATGTAATAAAGTAGCTCTTGGTCATCATAAAGAT…
FAJX01000221.1_1	GTGTTTAAAGATAAGATTGATGAATGTGTTCATATAATGACTGCATATATTGCTAGTTTAAAAGAATACTATTCATTCATAGAATCTCAAATTGGTGATTTTATTAAAAAATATGGAGAAGATGTTGTAGAGTTATGTCTCCATAGAGTGATGATTCTACTATGCGAATGTGGTTTGGCATAA
ERR348081_ST1_82_3	GTGGTTAGTTCATTTTTAAATGATATCTTTAGAACAATTTTAGTAAGTTGTATTTTTATAGTTATTTTATTAGTCTTTAGAATAACTTTATTTAAGACTTTCAGTAAAAAATTTAATTACTATATATGGCTTATTGTGATTATTAAGCTATCATTACCATTTATGAATTATACTTTTATATTTAATGAGTCAAAATATAATGGTAATATTAATAAGATAAGTTTAGGCAATTTTAATAGTATTTCTATTGTATATAGTACTGTTTTAGTCTCTGTTTGGATTGCTATTACGATATTTTATTTAGTTTATACTTTATTGAAATATATTAAGCTTAAAAATATGATAAATGATTTGTCTTATGATGTTGAGGATGATAAGATAAAAAATCTTTATGAAAAT…
ERR348049_ST1_98_128	ATGATAGATTTAACTTTACTTGGATGTGGTGGAAATGTACCTATGCCAAACAGATTTCTATCCTCTGTATTTATAAACTATAAAGGTAGAAAAATACTAATTGACTGTGGTGAAGGTACTCAGGTATCTATGAAGCTAAAAAAATGTGGCTTTAAAGATATAGACTTGATTTGTATAACCCATTTACATGGTGACCATATATTTGGACTTTTAGGACTTTTATCAACAATTGGGAATAGTGGTCGTACAAGTGATTTAACTATAGTTGGTCCAGTTGGAATAGTCGATTGTATACGTTCTATGAGAAATTTAGTAGAATATGTACCATACACTTTAAAAATTATAGAAAACCCTCAAGGCAATTTTTCTTTAGATAATAAAGTTTTAAGAAATTTAGAA…
ERR347973_ST1_99_29	ATGTTTAAATTAATTAAATATTTAAAGAAATCGGCATTATCAATAGTAATAATAGTCTGTCTATTGGTAATTCAAGCGGTATGTGACCTTTCTTTACCAGAATACACATCCAGTATAGTAAATGTAGGTATACAACAAGGTGGAGTAGAAAACTCTGTTCCATCTGTGATTAGAGAGAGTGAATTAAATAAAATTACTTTATTTATGGATAAAAGTAGTAAGGATAAAGTACTAGATAATTATACTTTGCTGAATAAAAAGGATTATGTTAAGTATAAAGATAAGTACCCAGGTCTAAAAGATGAATCTCTTTATGAGTTAAATACTAAAGACAAAGACACTATAGATGATTTAAATGTTATTTTTGGTAAAGCTATTTTAATAGTATCAGGGCTTGAG…
ERR928296_ST1_85_43	ATGATAAGAGAGATAAATACTAAATTAAATTCTTTTGAGATATTTACTATTTTTAGAAATGAACATGACAGTTTTATATTAGACAGTGCTATGGATAAAGAAAAATTGGGAAGATATTCTTTTATAAGTAGCCAACCATTTAAGGTATTAAAGTATAAGGATACTGATGAAAATCCTTTAGAAGTTTTAAAAGAAGAACTACATAAGTATAGGGTTGTAAATGATACTAATCTTCCATTTGTAGGAGGTGCTGTGGGATATTTATCTTATGATTTAGGTAATTACATAGAAAATTTACCTAGAACTGCTGTAGATGATATTGAGATGCCTGATATGTATTTTGGATTTTATAATCATGTAATAGTTATAGACCATCTTGTGCAAAAAACTTATATAGCT…
FABJ01000009.1_33	ATGGAGATAAAATTATTTGATTCAGAACTTAAAGTAATGGAAGTTCTATGGGAGAGAGGAGAAAGCAAGGCTGGAGAGTTAGTAAAAATTTTAAAAGAAGAAACAGGATGGAATAGAAACACTACGTATACCGTTATAAAAAAATTAGTGTCAAAAGGTGCAATAGAGAGAATTGAGCCAAATTTTGTTTGTAAAGCTTTAATAAGCAAAGAGGAAGTACAAAAACAGGAAACAGAAACTTTAATTAATAAAATGTTTGGAGGGTCTTCAGAAAAATTTCTTTCAGCTTTTATTAATAAAGAAAATCTTTCAAGTGATGAGATTACAAAACTCAAACAAATTGTTGAACAATTAAAGTGA
ERR928304_ST1_99_91	ATGAATTTTTTAAATGGTATTTTAACGAGTATTAACAATGCAGTAGTATTTGTAAACAATTACTTATGGTCGTATATCTTAATTATAATGTTAGTTGTAATTGGTATTTACTTTACTATTAAAACAAATTTTGTACAATTCAGATATTTTATAGAAATGTTTAGACTTCTGGGTGATGGTACAGCGAATAAAAATGCAAAAAAGGAAGGAAAAATCTCTTCATTTCAAGCATTTTGTATAAGTACATCTTCAAGAGTTGGAACTGGAAATATAGCTGGAATAGCAATTGCAGTGGTAGCAGGGGGACCTGGTGCTGTATTTTGGATGTGGCTTATAGCATTAATTGGTTCTGCATCAAGCTTTGTTGAGAGTACATTAGCTCAGATTTACAAAGTGAAA…
FAIP01000001.1_61	ATGAGAAAAATAATTGAAATTAAACATCATTCACATGATTATGAGTGTATGTGGAATGGTATAGAAGATTTATATATAAATAAAACCGGTGAATGCCTTCCAAACGATTTTTTCTTTTTACTGTCAGGTTTTGGTTCATTTTGTTATATGAAAACAAATAAAGCTGATTTGAAAAGAATGGTAGCTTTGGGAGATGGAAGGACAAAACAGATGTATAAATTTTTAGCACCAATTGTTGGATTTGAATACAAACATCATGAGTTTAAAAAGTATGAGCAAGCATTAAAGAAAGCAAAATCTGAAATTGATGGTGGATATCCAGTTATTTTAGGAGATTTAGATATGTATTATCTACCATATTATAAGAAGCTATATCATAAAGAACACATTCCTTTTCAT…
HS-FS-000016-I-01_69_110	ATGATTGCAATAAGTTTGTGCATGATTGTTAAGAATGAGGAAGAAGTTATAGGCAGATGCTTAGAATGTGTAAAGGATATAGTAGACGAAATTATAATTGTAGATACCGGTTCTACAGATTCCACAAAAGAAATAGTCTCAAAATATACAGACATGGTGTACGATTTCGAATGGATAGATGATTTCTCTGCTGCAAGAAATTTTTCATTTTCTAAAGCTTCTAAAGACTATACTATGTGGCTTGATGCAGATGACATAATTTTAGAAGCTGATAGAGAAAAATTATTAAAGATTAAAGAAAGCTTGGATACTTCCATTGATATTGTTATGGCAAAATACAATGTATCCTTTGATGAAAATGGTAACCCAACTCTCTCATATTATAGAGAACGATTGTTT…
HS-FS-000016-I-01_70_147	ATGAGTCAATATAGTGATTTTGCGTTTGTATATGATGAACTTATGAATGAAGTTGATTATAATGGTTGGGTTAAATATATAGAAGATATAATAGATAGTGAAGGTGTAAAAGTAAAAAATATATTGGAATTGGCATGTGGCACGGGTAATCTTACAATTCCATTGACTAAAAAAAATTACGATATAGCTGGTATAGATATATCTGATGAGATGCTTAGTGTAGCAAGAGAAAAGGCAGAAAAAGAAGGAGTAGAATTAGTTTTACTTCAACAAGATATATCAGAGCTTGATTTTGAAATATCTGATTTGGACTGTGTGCTTTGTGCTTGTGATGGATTTAATTATATAACTTATGATGATGATTTGGAAAATGTATTTTCAAAGACATATGAATTATTA…
HS-FS-000016-I-01_70_136	ATGAAGCTTTTAATACATGATTTAACTGACAAAGAATTAGAAAAGTTATTACCCAAGCTTGATGACAATATAAAAATACTTCCAAACACAAAAGAAATCCACAAATGTATTGGTCGTTTTGGTTGCTGGATTAAAACTCCTTCTGAATGTGTTGTAAAAGATTATTACAGCAACATGGGTAAACTTATAAATGAATCCGATGGAATTATTATAATAAGCAGATGCTGTTACGGAGGGTTTAGCCCTTTTGTCAAAAACGTACTTGATAAAAGCATTAATTATATTCTTCCATACTTTGTAATAAAAGATAATATGATGCGTCATAAAAGCAGATATGATAAACAGATAAATTTAAAAGCTATATTCTATGGAGATTGTATTACAGAAGCTGAAAAAGAA…
HS-FS-000016-I-01_70_91	ATGTTTACAGTAAATGAAAATTTAACTAATAGAAAATCGAAGGGAGATATACAAATGTCAGTTATTGAATTAGTATATGCTAGAGAAGTATTAGACTCAAGAGGAAATCCAACTGTAGAAGTTGAAGTAGTATTAGAAGATGGAGCAATGGGAAGAGCAATAGTTCCATCAGGAGCATCTACAGGAGCTTTTGAAGCTGTTGAATTAAGAGATGGAGATAAGGGAAGATACTTAGGAAAAGGTGTAGAAACAGCTGTTGCTAACGTAAATGAAATAATAGCACCTGAAATAGAAGGAATGGATGCATTTGACCAACCAGCTATAGATGCAATCATGATAGAATTAGATGGAACTCCAAACAAAGGTAAATTAGGAGCTAATGCTATATTAGGTGTTTCA…
HS-FS-000016-I-01_69_46	ATGAAAACTAGAAAAATGACATTTTTAGGTCTTATGATAGGGTATAGTTTAGCTTTATATGTACTAGAGACATATATACCAAATCCTCTTATAGTTATATTTCCAGGGGCAAAATTGGGTTTGAGCAATATTATAACTTTAATTTCATTAATGTTGTTAGGTGTCAAAGATACTGTTATAATTGTTACTATCAGGGTAATTTTGTCATCAATATTTGCAGGCCCTTTATCATATCTACTATTTAGTATAGGAGGAGCTTATCTGAGTCTTTTATTTATGTATTTAGCGAGTAAAATAAAAGATTTATCACTAATAGGGATAAGCATTATAGGTGCAATAGGGCATAATATAGGTCAATTAATAGTTGCAAGTTTAATCATAGAAAATATACTTGCTATA…
FALT01000045.1_34	ATGGAAGAAAATAACAAAATACTCCCTATTGAAATAGCGGAAGAAATGAAAAAATCGTATATTGATTATTCAATGAGTGTTATAGCTGGACGTGCTCTTCCTGATGTTAGAGATGGTTTAAAGCCAGTTCATAGAAGAATATTATATTCAATGAGTGAGTTAAATTTAACTCCAGATAAACCATACAGGAAGTCAGCTCGTATTGTTGGGGACGTTTTAGGTAAGTACCATCCTCATGGAGATATTGCTGTTTATTATGCTATGGTAAGAATGGCACAAGATTTTTCAACTAGAGCACTTTTAGTAGATGGTCATGGTAACTTTGGTTCTGTTGATGGGGATTCAGCAGCTGCTATGCGTTATACAGAAGCTAAAATGAGTAAATTATCATTAGAACTA…
NODE_23_length_68103_cov_298.413_32	ATGCAAATTTATTTTAGAGTTAAGGCTGTTGGCAAACGCAAACCTATGTTAGAACTTACCCCTTTTGATGTATCTGACAACATCAATTGCCTAAAAGAAGCTATCTCTGAAATTGTATCTAAAAATGTTCTTGAATATAATGAGAAAATCCCAGAAAAATCAATAATAAACTTCTTAACTAATGAAGAAATTGAATCTCAAGCTGATATTGGAAAAGTTGGATTTGGCTCTATTTACAATGAGAATAAACAATCTGTAGAAAAGGCAATAGAAGTAGCGTTACAGGCATTTGAAGATGGAATCTACAAAGTTCTTATAAATGAAGATGTTATTGAAAAACTCGATTCCCCTATAAATCTGAAAAGTGGAGATATATTTACTTTTATAAGACTTACCTTG…
NODE_21_length_73039_cov_304.126_53	GTGAACTTCAATAGATTTACACAAAGAGCTAAAAAGGCAATTGATTTAGCGTTTGAATCTGCTAAAAGTCTAGGACACAATATTGTTGGAAGTGAACATATACTTTTAGGTCTTTTAAGAGAAGAAGAAGGTATAGCTGCTAAAGTTCTAAGTAAAGTTGGATTTACAGAAGCTTATTTAGAAGGCAAAATAGTTGATATGGAAGGTAAGGGAGAAGAAATCTCAGAAGATATAGTATTAAGTCCAAGGAGTAAACAAATACTTGAATTATCAGGAATGTTTGCAAATAAATTAAAAACAAATTATATTGGGACTGAGCATATATTATTAGCAATTATTCAAGAAGGTGAAGGAATAGCTAATAAGATTTTAAATTATGCTGGAGTAAATGATAGGACT…
ERR030346_ST1_166_10	ATGTTGATTCATTTAGTTAAAAAAGATATTCTGATTGTAAAAAAATATGTATTGTTGATATTGTTTATTGCAATAGGAATCCCATTATTTATATTATGGCGTTTACCTCCATTTGCACAAATATTGGGATTTGTACTATCAATTATATTTTCAGAATTTATGCTGTGCCAGTATCTATTATTAAAGGAGAGTCAATATTCAAAAGCATCTGTATTACTTTGTTCAACTCCTTATCCTAGACGTGGCTTAGTTCAATCTAAGTATGTTTTATTTGCAATGGTATTTATCTATTGTACATTAGTTTACTGGATTGAAAATTTACTTATTCCACAAATAGGAACTTTTGACTTAACATATATTTTGATTGTTTTATTAATAAGTTCTATTATTTATGGAGTT…
NODE_33_length_37230_cov_41.8027_35	ATGCTTCTAGTATTTGATGTTGGAAATACTAATATGGTTTTAGGTATATATAAAGGTGACAAATTAGTTAATTACTGGAGAATTAAAACAGATAGGGAAAAAACGTCTGATGAATATGGAATCCTGATAAGTAACCTATTTGATTATGATAATGTGAATATAAGTGATATTGATGATGTTATAATATCATCTGTAGTTCCAAATGTCATGCATTCTCTTGAAAACTTTTGTATAAAGTACTGTAAAAACCAGCCATTAATAGTAGGTCCAGGCATAAAAACAGGTCTAAATATAAAATATGATAATCCAAAACAAGTTGGGGCAGATAGAATAGTTAATGCTGTAGCAGGGATAGAAAAGTATGGAGCACCAAGTATACTTGTTGATTTTGGAACAGCA…
NODE_14_length_114778_cov_41.5001_46	ATGGCAACAAGACCTATAGAAATAGACGAATATAAAAAGATAATGGAACTATTACATACTGGCTTTACTTATAGTGAAAATGGCGTTGAAAAAAGATTTAGAAAAAATCCTAAAGTTGCATTGGCACTAATGTTAGAAGCTAATTTAGGTCTAAGAATATCAGATATTTTAAGATTAAAGATAGGTAATTTTAAAGGTAATATGTTGGAAATAAATGAAAAAAAGACGGGCAAATTACAGTATAGACCAGTTAATAAAAATATAATTGAGTCCATAAATGAACATGCAAGAAAGTATAATCTTAAATCAAATGACTACTTAGTAAATATAAAGACAAAGGCTATTCAAAAACAGTTGAGGATAATTTGTAAACACTTAAATCTGTATAATATAAGTACA…
ERR029516_ST1_215_9	GTGAAATATGTATTAGCAATTGACCAAGGAACAACAGGAACAAGAGCAGTATTGATAAACGAAAAATCAGAGTTTGTTTTTAGCGATTATATGGAACATACTCAAATATATCCACAATCTGGATATGTTGAACATGACCCTATAGAAATTTGGAATAATACAAAAACTGTGAGTAATAATGTATTACAACAGGCTTTTGAAAGTGGAATCAATGAAAGTGATATAAAAGGAATTGGTATAGATAATCAAGGTGAAACAGTAATGTTATGGGATAAAAATACAGGTAAACCACTTTACAATGCTATCGTATGGCAGTGTAGGAGAACTTATGATTATGTGGAAAATTTAAAGAATATACCAGGTTTAGAAAATAAGATAATAGATAAGACTGGGTTAATT…
ERR029537_ST1_184_77	ATGTTACGATTGAAAGAAAGAATAATAAGCTTTATTACTATGTTAGGTATTAAATTAAAAATAATAAAGCCAAAGGGAATATACTATATGGGAGGGGCAAATATACTTCCTCCTCCATTGAAACCAGAAGAAGAAATGGAGCTTTTACAAAAGCTAGAAACAGATGAAAATGTAAAGTCAATTTTAATAGAAAGAAATCTTAGATTAGTAGTCTACATATCGAGAAAATTTGAAAATACAGGTATAGATGTAGAAGATTTGATTTCAATAGGAACTATAGGTTTGATAAAAGCAGTTAATACTTTTAAACTGAATAAAAATATAAAATTGGCAACTTATGCTTCGAGATGTATAGAAAATGAAATATTAATGTACTTAAGAAAAAATAATAAAAAGAAA…
ERR030325_ST1_281_24	ATGAAGGGGAAATTAATTTTAGAAGATGGAACAGTATTTGAAGGAAAAGCATTTGGATATCTAAAGGAAGCTATTGGAGAAGTTGTATTTAATACTTCAATGGCTGGGTATGGAGAACTATTGACAGATGCAACTTATTATGGACAAATAGTTACTATGACTTATCCACTTATAGGAAACTATGGAATAAATTTAGAAGATGTTGAATCAAATAAGGTGCAAGTAAAAGGACTTATTGTAAGAGAAAAAAGTGATAACCCAAATAATTTTAGATGTGAAATGGATATAGACACATATCTAAAGCAAAATAAGGTAATAGGACTTGAAGGAATAGATACAAGAGCATTAACTAAAATTATTAGAAATAATGGAACTAAGAGAGGAATTATAACTTTAGAA…
NODE_35_length_23958_cov_49.3841_2	ATGTTTATTATTAATGAATTAAATAAGATTGTAAATGAAGAAGTAATATCTTTTCATATGCCTGGTCATAAAAAGGGACAGGTTTATAAAAAGTTAGGATATAAAGATATACTAAAAAATTTGTATAAAATGGATACAACTGAGATATTAGGAACAGATAATTTACACTTTCCGGAAGGAATTATAAAAAATTCACAAAAAAAAGCATCAAGAGTATTTAAAAGTGATTATACTTGCTATTTAGTAAATGGTAGTAGCTGTGGAATACAATCTGCAATAATGTCAGTATGTAGTCCTAAAAGTAAAATAATAACAAATAGAGACTGTCATCAGTCTGTTATAAATGGATGTATTTTAGGAGATATAGATATAGAGTATGTGCCTTGTGAGATAAGTGAA…
ERR339518_ST1_477_9	ATGGATAACTATAAGAAAGTGAAGCAAGTATTGTGGATAATTTTATTTGCTAATTTTGCAGTAGCATTATTAAAAATCATTATTGGTAATCAAATAAAAAGCTATAGTATGACAGCAGACGGATTTCATTCTTTGTCAGATGGAGCATCTAATATAGTGGGGCTTATAGGTATTTTCTTTGCATCTAAACCAAAAGATAAAAATCATCCTTATGGACATAAAAAGTTTGAAATTATAACCAGTTTATTTATAAGTGGTATGTTGTTTGTTATAGCAATTAAGATAATTCTTAGTGCAGTGCTAAGAATAGCTAATCCAGTTGTACCTGCTATAACTATAGAAAGTTTAATTGCTTTAATTATTACACTTTTTATAAATATTTTTGTATGCATGTATGAA…
ERR347961_ST1_88_98	ATGGTTAAATCCAAGAAGAAAATATTTGTTTTTCTAATTTTAATTGCAGTTTTTATTATATTTGCATCATACATAAGAAATTATACTAATGATACAAAAAAAGATTCTGTTAGAGGAACTATTCCTTTTGAAAAAATGGAATATAAGCGTCCTAATATACAGTCAATTTGCGAAAACATTAACAAGTGTAACGATAAACTTTTAACAGCTAAAACAGCTAAGGAACAATTAAATTTATTTAATGAAGTTGATAAAATTTATCAGGATTTTTACAGTACACTTACTATAGCAAAAATTAGAAATAACATAGATTCATCAGACGAATTTTACTCTAAGGAATATAAGTATCTTATGAGTAAATCAGTAGATGTTGACATGTCATACAAAGACTTTCAAGAT…
ERR347956_ST1_93_82	ATGTCGATTAATTTATCAAAAGGTGATAAAATAGATTTAAAAAAATCTAACCCAGGACTGAGTAACATACTTGTAGGTCTAGGATGGGACCCTGTGCAACAATCTGGAGGAGGTTTTTTTAAATCGTTATTTGGTGGAGGACAAGCTGATATAGATTGTGATGCATCTGTATTTATGCTTAATCAAGAAGGTAAATTAAGTGGAATAAAAGATTTAATTTATTTTGGAAATCTAAAAAGTGGCTGTAAATCAGTTTTGCATACAGGAGACAATCTAACTGGTGAGGGTACAGGTGATGATGAACAAATCCTAGTTAATTTGGATAAAGTTCCATCAAATATTCATAAATTATTGTTTGTAGTAAATATATACAATTGTGTAGATAGAAAACAACACTTT…
NODE_1_length_309962_cov_43.0578_62	ATGAAGGAAAAAGTAGTATTAGCATATTCAGGAGGACTTGACACATCAATCATAATACCTTGGTTAAAGGAAAATTATGAAGATATAGATGTTATAGCTGTTTGTGGAAATGTAGGTCAGGAAGATAAAATGGAAGATGTATATGAAAAAGCTTTACAAAGTGGAGCATCAAAGGCATATGTGGATGATATAAGTGAAGAATTTGTAACTGAAACTATATTTAAAGCCGTAAAAGCAGAGGCTAAATATGAAGGAAAATACTTATTAGGAACTTCTTTAGCAAGACCTATAATAGCTAAAAAATTAGTTGAAGTTGCTCATAAAGAAGGTGCAAAATATATATGCCATGGATGTACAGGAAAAGGTAATGACCAAGTTAGATTTGAAGCTACAATTGCA…
NODE_12_length_125761_cov_46.596_8	ATGAAAATAATTCAGATTTTAAATAATAATGTAGCCTTAGTAAAAAGAGGTAAAAATGAAATTATTGTATTTGTTAAAGGAATTGGCTTTAAAAAAAGAGTGGGACAAGTAATAAATGAAAATGAAATAGAGAGAACATATATACTAGATTCATACGATATGCTAGAACACTTTAGTTATCTACTACAAAACTCAGACTCCAATAATATAGTTCTTATTAATGAAATAATTGAATATGGTGAGAAAGCTTTAAATATAAAGTCAAGTGATTATCTAAGCTTAACCTTACTAGACCATTTAGAGTTTTTACTTAAAAGATGTGAAAAGAATCAATTTATAAAAAGTCCTTTGGTATGGAATGTTAAAAGATTTTATCCAAAGCATTTTGAAATTGGAATG…
NODE_13_length_115221_cov_56.2479_82	ATGAATTATAAATTAATACTTGCAATAGTATTTATAACATCAGCTTTAATTTTCTACACTATAGGTGTATTTGGAGAAAGAAAGGCAAAAATTTTAAAAAAGAAACATGTAATTATATTTTGGCTTGGGTTTATATTTGATACTTTAGGAACATTTACAATGAGTAACATAGCCACCAGCCATACTTTTGAAGTAAAATCTGCTTTATCACAAAACCTTCATAGTATTACAGGTCTTCTTGCAATTGTGCTTATGCTTTTTCATGCAAGTTGGGCTACTTTTGTCCTATACAAAGATGATGAGGAAAAGAAAAAATTCTTTCATAAGTTTAGTATAGTTGTATGGACTATATGGTTAGTTCCATACTTTATAGGTATGTTTATTGGTATGGTTGGATAG
HS-FS-000016-I-01_75_57	TTGCTTGATATAATTTCATGTGAATTTTCAAAACTCAAGCGGTTAAAATTTATACTGATTTCTATTTTAGGTGCTTGCTTATTTCCAATTCCCGCAACAATTTTGATTGCAAAGGACAACTTGCCCTTTGAGCAATTGTTCAAATTAGTTGTCAATTTTGGATATTTTTTGCTATTACCAATTGTATTAAGTATTGTTGCTAGCCAACTATTTTTTATAGAAAGAGATAACGATGTATTAAAAAATCTTGCAACAGTGCCAGTGCCAAAAGGAAAACTGGCTCTGGCAAAATTGGCTGTGTTGCTGTTTATATCATTGTTCTACTCCGTTGCAGGGTTAGGAGCTACTATCATTGGAGGTTTCATTGTTGGAATAGTAGAGGGGGTTACTGTAAAATTA…
HS-FS-000016-I-01_63_106	ATGATGTATTTAGTTAAAGCTGAAATGATAAAAATATTAAAATCAAAGAGTGTTTGGATAATTTGGCTGTTTTTAATATTTTTGGGATTTCTTCTGATTAGAAAGTTTGATGTTTTAGATACTTATGCAGATATATTTTACAAGATAGAAGGCTCAATACCTCTAATAGGTTTGATAATGTTTATAATAACTTCTGGAAATTACATTAAAGAATATGATTCTAATATGACAGGTTTAATAAATACAACTAAAAAGGGAAAAAAATCAGTAGTATTATCAAAACTAGTAGCTAATGGATTAATTTTATCTATTATTAATATTTCTTTTATATTGTTAGTAGGAATTAGAGGTTTTAGTTTTTTTGATTTTAAAAATTTAAATGAACCGATTCATAACTTA…
HS-FS-000016-I-01_63_64	ATGCAGTATATACAAGAATTACTTGATTTGACTCAAAATTATTGGGTGTTAGCCACAATAATCGGCTTATTAAGTGCATTTATAGAAAGCTTTATACCAGCCTTACCACTTGTTGCTATAGTTACAGCAAATGCTGCAATACAAGGATTATTTATTGGATGTTTGTTATCATGGATTGGCTCAGGACTTGGGACAACTTCATTATTCTTATTAATAAGCAGATTTAATGATAGTAAGCTTTTTAATAAGTTGAGAAATAGTAAAACTGAAAAAGCAATAAGTTGGATGGATAAACAGGGATTTAAGTTATTATTTATAGCGTATGCCTGTCCATTTATGCCTGGTTGTTTAGTTACTATCGCATCAGCTTTTGGTAAAAAAGATTTAAAAGATTTTGTG…
HS-FS-000016-I-01_64_266	GTGGATATAGATAGAATTTTAAACTTTTCCTCAAATGCAGGTAAAGCTATGTTGCAAAGTGGAGGAGAAACCTATAGAGTTGAAGAAACGATAGCTAGAATATGTCAATCTTTTGGAATAGACCACGTAGATGTATTTGCAACTCCAACAGCTGTAATGGCATCTGTATTTGTAGATGGGAAATTACATTCAGCAATTAAAAGAATAAGCTCAAGAAGAGTAGACCTAAACTTGGTTCATGAAGTTAACTCATTATCAAGAGCAATAAGTATAAATAATTTAGATATTGAATTATGTGAGAAAATTTTAGATGAAATAAGTGAAGATAACTATTACTCGGATTTAATAACAATATTTTTTGCAGGTATTGCAGCAGCAACTTTTTCGATATTATTTGGA…
HS-FS-000016-I-01_71_149	ATGAATAAAGTACATTTTGTAGGAGCAGGACCTGGAGATAAAGAGCTGATAACATTAAAAGGATACAAATTATTAAGTAATGCAGATGTAGTGATATATGCAGGTTCACTTGTTAATCCTGAACTTTTGGAATACTGTAAAGAAGATTGCCAAATACATAATAGTGCACATATGGATTTACAAGAGATAATAGATGTTATGAGAGAAGGTATAGAAAATAATAAATCTGTTGTAAGACTGCAAACAGGTGATTTTTCTATATATGGTTCAATTAGAGAACAAGTGGAAGATTTAAATAAATTGAATATAGATTATGACTGTACTCCTGGAGTAAGTTCTTTTTTAGGGGCAGCATCATCTTTAGGGGTTGAATATACAGTTCCAGAAATTTCTCAAAGT…
HS-FS-000016-I-01_64_256	ATGTTTAATGCAGGAAATCGAATTATAAATACATGGTTGTACCCTATTCAAGATGGCTTTGTCTTGATTGATACTGGATATGAAAATGGTTTTAAACATTTCAAAAAACGAATTTCTAAATTCAACATAAAAATCAAAGATATTCGATACATATTTCTAACTCATGCTCATGATGACCATGTTGGTTTTCTAAATCAGATTCTAGACGAATCTCCTAATACAAAGATTGTTATGCATGATAAAGCTTTAGAAATTCTATATAAAGGTCAAAACTCTTTTATTGGTGGTTGTAACAGCCGTACTGCCTTTCTCTTTTGCCAAATTATGAAACTATTTGGAAAAGGTGAGCATAGTTTTTCTCCACTTAAACAAGAATTTGAAAAAAGGTGTATTCTTGTG…
HS-FS-000016-I-01_63_575	ATGAAAAAACTTAAATTAATTATTATGCTTGCCTTGGTATTAGCACTTTTAATTACAGGATGTTCATCAGGAAATAATAAAAATAAAGAAGAACAAAAAACTATAAGAGTTGCAACATCAGGAACATATTACCCTTTTGCTTTTAAAGATAAAGATAAACTTAAAGGATTTGAAGTAGATTTTTGGGATGAATTTGCTAAACGAACTAATTGTAAAGTTGAATGGGTATTAACTGATTTTAGTGGATTATTTGGATTATTAGAAGCTGATAAAGCAGATGTTGTATCTGCTCAACTTACTGCAACACCTGAAAGAGAGAAAAAATATGCTTTTTCAGATGCTTATAATTATAGTGGAACAAACATTATTGTTAGAGAAGATGATACTAGTATAAAATCA…
HS-FS-000016-I-01_65_91	ATGATAATGATGGTACTTAATAAGAGTAAGCTCAAAAAAATCATAATACTAATTTTAGTAGTGTTATTAGTATTATCAGGAGGGGTAATGGTATTAAAGTTATTTAACAACAAGCCAGTATTTAATTTATTTAATGGTGTAGATTTACCATATGAAAGAGGTACAAAGGATAAAAGTGGATATGTTGCATTAACCTGTAATATAGACCTTGGATGGGAAACAGAGTACGTAGAATCCATTTTAGAAACACTTAAAAAAGAAAATGTAAAGATTACATTTAATGTAACTGGAAAATGGGCAGAAAAGAATAAGGATGAATTATTAAAGATAAAAAAACAAGGACATGAAATAGGTAATCATGGATATAAACATTTAGATTATTCTACATTATCATATGAA…
HS-FS-000016-I-01_71_148	ATGAGGAATAGTGAATTTATAACAGGTAAAGTTCCAATTACTAAGGAAGAGGTTAGAGCAATATCAATAAGTAAGTTAAATTTAGTAAATGCTAAAAACCTCATAGACATAGGGGCTGGTACAGGAAGTGTAAGTGTTGAAGCTGCATATAATTATCCTAATTTAAAGGTTATATCTATAGAGAAAAATGATGACGCTATAGAGCTTATAGAGAAAAATATAAAAAAATTCAACTTAAAAAATATAGAAGTGATAAAAGGATATGCTCCAATTAATCTAGGGTTAAATGTTAAAGTTGAGTCTATTTTTCTTGGGGGAACAGGAAATAATCTGGAAGAAATAATAGAATGGTCTAAAAAAAATCTCGTTACAGGAGGAAGACTTGTAGCTAATTTTATA…
HS-FS-000016-I-01_67_162	GTGGTAGATAGTATTATTTTTGATTTAGATGGAACATTGTGGGATTCAACTGAAGAAGTATGCAAAGTCTGGCAGGATGTTTTAAGTAAACATAAGGAAATAGAATTAAGTGTCACAAAAGATTTATTTAGAAGTCTTATGGGGCTTTCTTTTGAGGAAATAGCAAATCGTTTATTTCCAAATTTAAGTGAAGAAGAAAGAATGAATTTATTGAATGAATGTTCTTTGAAAGAATGTGACTATTTATCTGAAAATGGAGCTAAATTATTTGATGATATAGAAGATACTCTTAAATTACTATCTAAAAAATATAAATTATTTATAGTAAGTAATTGTCAAGCTGGATATATAGAATCTTTTTTAAAAGCACATAAACTAGAACAGTATTTTATAGATTTT…
HS-FS-000016-I-01_77_83	ATGAAGGCTTTACAAGAAAAGATATTGAGAGAAGGCAGTGTTTCAGGAAATGATATACTAAAAGTTGATAGTTTTTTAAACCATCAAATTGATGTAGCTTTTTTAAATGAAATAGGAAGAGAATTTAAAGAGAGATTTAAAGGAGAAAAGGTGGATAAGATATTTACAATAGAGGCTTCAGGAATAGCTATAGCATCAATTGTTTCACAGTATTTTGATAATGCACCTGTAGTATTTGCAAAAAAATCAGAATCTAAAAATTTGGATAAAGATGTATATGAAACTAATGTATATTCATTTACTAAGGCAAGAGAGTATTCAGTTAAAGTTTCTAAAAAGTACATAAACAAAGGCGAAAATATATTGATAGTGGATGATTTTTTGGCAAATGGAAGAGCT…
HS-FS-000016-I-01_65_159	ATGGATAAAAACTATACGATGCCAATATACCAAAAAATAGCGTTGGATATTGCAAATAAAATATACACGGGTGAAATACAAGAGGATTCAGTACTATTTGGACGCTCTGTTTTGGCTGGTAAATACAATGTATCTCCAGAAACGATAAGAAGAGCTGTCAAAATTTTAGAGGACATTGGCGTTGTTAAAAGCATAAAGGGTAAAGGTGTTATTGTACTATCTCCAGACAAAGCTTCTTCTTTTATAAAAAAATATAGAGATATTACAAATATATCATCATATAAATCAACACTTTATAATTTAATAGATACTAAATCTAATTTAGAAAATGAAATATTAGATACTATAAATAAAATTTTAGACTATTCCAACAGACTTGAAATAATCAATCCTTTAGTG…
HS-FS-000016-I-01_73_14	ATGTTTGAAAAGAAGAAAAAAGAATTATTTCCTTGGAAAATATCTGCCTTAATACTGGTTGGAGTATTTGTATTAAGTAGCGGAGTTTATATAGGGACAAGATTAAAAAATAATGGAGTTCAAACTAGTAAAGTTGTAAGTGCTAGTGCGAATATGGACGAAAAGTCAAAAGAAGCTTTTGGATTAAATAAAAATTGTGAAGTTTGGCTTCAAAGTGAAGGCGAAAATGAAACTAACTATAAGAGAACACTTACAATGGCTGGGATAGTTCCAGAGTCATTATTAGATAAGACAAAATCAGAAATAGTATCATATTTTAAAAAAGAATATCCAACTAAAAAAATAAAGAGTATGGATAAAAATGAAATCATATTGGTAGAATCTAAATATAGTGATAAT…
HS-FS-000016-I-01_63_112	ATGAAAATTTTGTTAACAGGATTTGACCCATTTGGGGGAGAACTAATAAACCCAGCTCAAGAAGCAGTTGAAAGGGTCAATAATAATATAAACGGTGCAGAAATCATAAAGATAACTATACCAACAGTTATGACAAAATCTGTTGAAGCTATAGATAAAGCTATTCAAGAGCACAATCCAGATATAGTAATATCAGTTGGACAAGCTGGAGGTAGATTTGACATTACACCTGAGAGAGTTGCTATAAATATAGATGATTTTAGAATAAAAGATAATGAAGGTAACCAGGTTATAGATACTATTATAAAAGAAGATGGTGAACCTGCATATTTTTCAAAATTACCTGTAAAAGCCATGGTAAAACATATGAATGAAAATAAAATTCCAGCTAGTGTTTCA…
HS-FS-000016-I-01_76_68	ATGAAACCAATAATAGGGATTTTAGGAAATTTAATAATAATGGAAAATGGTATGTTTCCAGGTCTTGAAAGGTCATATGTAAATAATGATTATATAAATGCAGTGCTAAAAGGTGGCGGTAGTCCAGTAATAATTCCTGTAAATACAGATAAAGAAGTTATAAAAAAACAGATTGAAATGGTTGATGGAGTCTTAATATCTGGGGGATGGGATATCAATCCTCAACTGTATGGAGAAGAAACAAGAGAAGAAACGACATTTATATATCCAGAAGTGGATGAATTTGATTTAATTGCAATAAGTATAGCATTAGAACTTAAAAAGCCTATATTAGGTGTATGTAGGGGACTACAAATTTTAAATGTAAGTTTAGGAGGAACTTTATATCAAGATAATAAT…
HS-FS-000016-I-01_66_204	ATGGAGAATAATTTAATTGGAAGAGAAGATATAAGCATAAATCAAAGTGAAGTTTTAAGATATTTACAATACAGAGGTCAAGAGATAGATAAAGACCTTAAATATACTATTGATGAATGTGTAGCTATAACTAAAAATAAAATAAATCCTAGATATTTATCTAGGATTTATCCTATTAGAATAAATAAAGATAATGTTGTAGAATTAGAGGGAACAAATTTAACATTAGAGAGTAAAGATGTATATGAACTTTTAAAAGAATGTAATGAGTGTGTAATTATGGCAGCTACTATAGGGATAGATATAGAAAAAGAAATAAGACGACACTCTTATTCAAATTTAACAAAAGGACTAATAATTGATTCATGTGGAACAACAGCAATAGAAGAAGTGTGTGAC…
HS-FS-000016-I-01_64_11	ATGATTAAGGGAAAGATACATTCTATAGAAACGTTTGGTACTGTAGATGGACCAGGAATAAGATATATATTATTTTTTCAGGGGTGTCCTCTTAGATGCAAATACTGTCATAACAGGGATACATGGGATATTAAATCAGGAAAAGAATACACAGTTGATGAAATAATAACGGATGCTCTTAAGTATACTTCTTTTATGAAGTTTTCTGGTGGAGGTATAACTGCCTCTGGTGGTGAATCCACTCTTCAACCAGAATTTTTAAGTGAATTATTTAAAAAAGCAAAAGAAAATGATATACACACTTGCTTGGATACATCTGGATTCGTAGATATAGAAACTATAGACCCAGTTTTAGATAATACTGATTTGGTTTTACTTGATTTAAAACATATGGTTGAG…
HS-FS-000016-I-01_82_72	ATGTGCAATAAAAGAAGTTGTAAAAAAGGTGGATTTTTATTATTAGGAGCTATTTTAGGGTTTATATTTGGTATGTTTTTTGCACCTAAAAAAGGTTCTGAACTAAGAAAAGAAACAAAAGAGAAGTTTAATGATGTCAAAGAAAATCCAAAAGAAGTTCTACATGAAACATTTAATGATGTTAAAGAGAGAATAATAAATTTAGTGGACGATGATAATAATGAAGAAGATATAAAGATTTCAGAAGAAGATATAGTAATAAGTAAAAGCTTTGATGATGAGGGAGATGTTAACTAA
HS-FS-000016-I-01_63_222	ATGAGAAACATAAAAATGATAGTAGCATACGATGGTTCAAGATATAAAGGATATCAAAAATTAGGTGACAATAATATGACTATTCAAGAAAAACTTGAAAATGTTTTAAGTAAAATGACTAATGAAACAGTGGAGATAATAGGGTCTGGAAGAACTGATATGGGAGCTCATGCAAGAGGACAAGTGGTAAATTTTAGAACTAATTGTATGGATTCTTTGGATAAAATTCAAAAATATTTATATGAATATTTACCAGAAGATATAGTTGTAAAAACTGTTGAAGAAGTTGATGAAAGATTTCATTCAAGATACAATGTAAAATCAAAGACTTATATGTATAAAATTGACAATAATAAGTATCACAATCCTTTTATAAGAAAATATGCTACTCATGTAAGT…
HS-FS-000016-I-01_81_49	ATGAATATAGTCGTTTGTATAAAACAAGTTCCAGATACAACAGAAGTTAAACTAGATCCTAATACAGGTACTTTAATTAGAGATGGAGTACCAAGTATAATAAACCCTGATGATAAAGCAGGTTTAGAAGAAGCTATAAAATTAAAAGAAGAAATGGGTGCTCATGTAACTGTTATAACAATGGGACCTCCTCAAGCAGATATGGCTTTAAAAGAAGCTTTAGCAATGGGTGCAGATAGAGGTATATTATTAACAGATAGAGCATTTGCAGGTGCTGATACTTGGGCAACTTCATCAGCATTAGCAGGAGCATTAAAAAATATAGATTTTGATATTATAATAGCTGGAAGACAGGCGATAGATGGAGATACTGCACAAGTTGGACCTCAAATAGCTGAA…
HS-FS-000016-I-01_73_59	ATGATAAAATTAATAGCAACAGATTTAGATGGAACTTTGTTAGATGAAAAGAGCGAAATAAATCCAGAGTTTTATAAAGTATTTAAAAAATTAAGAGAGAGAGGGATAATGTTTTCTGCTGCTAGTGGCAGGCAGTATCAAAATCTTATAAAAAAATTTGAAGATATAAAAGATGATATGATGTTTATATCAGAAAATGGAACACTAGTAGTATATAAAGGAAAAGAAATATTATCAAATCCTTTAAATAAAGAATTAGTAAATGAAATCATAGAGACAACAAGAAGTATAAAAGGGAAAAAAATTGTAATGAGTGGGAAAAAATACGCTTATATAGAAAGCAAAGATGAAGCGTTTATACAAGAGGTTAGTACTTATTATGCAAAGTTTAAAATTGTA…
HS-FS-000016-I-01_68_5	ATGATAACTAATGATAAAAGAATAAGAATCATAACTGGTCACTATGGAAGTGGTAAAAGTGAATTTGCGATGAACTATGTTGTTAAGTTAAGAGATATGGTTTCTGGCAAAGTTGCTATAGCCGATTTAGATGTGGTAAATGTATACTTTAGAACTAGAGAAAAGAAAGAGTTAATGAAATCCTTAGGTATACAACCAATAGATAGCTCAATTAATGCTCCAACATTAGATTTACCAGCAGTATCAGCAGAGGTAATGTCTCCTATGGTAGACCATTCATACAATTCTGTTATAGATTTAGGTGGAGATAATGTAGGTGCTAGGGTTATAGGAAGATTTAGTCATTTGTTAAAAGAAGGCGATTATGATATGCTTTTTGTAATAAATGCAAATAGGGAG…
HS-FS-000016-I-01_79_16	GTGAATAAAAAATTGAACTATAGATTTGAAATGAAGCACAAAATAACTGAAGCAGATGTGTTAGCTTTAAAATCAAGACTCTATCCAATAATGAAGAAAGATGAAAATGCATCTAAAGATGGAAAATATCTTATTAGGAGTTTATATTTTGATACTCCTGAAGATAAAGCACTTTTAGATAAATTAAATGGCGTTGCAATAAGAGAAAAGTTTAGGATAAGATTTTATAATAATAACTGCTCTTATATAAGGTTAGAGAAAAAAATCAAACATTACAACATGACATCAAAGCTATCAACTAATTTAACCAAAAAAGAAGTAATAAATATACTAAACAATGATATTGAATTTCTAAAAGAGTCGACAAATTGTTTATTAAGAGAATTTTATTTGAAATTA…
HS-FS-000016-I-01_63_567	ATGCAACAAGGAAGTGATTATTTGAAAAAATTTTTAGAAAAGCATATAGACCTACTTAAAAAAATTCCTCTATTTGAAGGAATTAAAAGTGATGAGCTTGAAGAAATGTTGGAATGTTTAGGTGTTGTAGATAAGACTTACCCAAAAGATAGTATAATATTCTCTGTTGGAAGTGAAGTTACTTCTATTGGAATTATGCTTAAAGGAAGTGCTCATATAATAAAGGAAGATATCGAAGGGAATAGGAATATTGTAGCTGAACTCTTGCCTGGAGATTTATTTGGAGAGGTATTCGCATGTACTAGACTACATAAAAGTAATGTTACAGTAACCACAACATCTTCTTGCGAAGTTTTATTTATAAAGTTTAAAAGTGTAACTGGTATTTGTTCATCTGCA…
HS-FS-000016-I-01_69_2	ATGGATATAGAAACAAAAAAATGGGAAGTATTGTATTCAGAAGAAAAAATTAAAGATAAATTAAGGGAATTAGGAGCAATTATAGAAAAAGATTATAAAGATAAAAATCTTATGGTAGTTTCTCTATTAAAAGGTAGCTTTATATTTTGTGCAGACTTAGTTAGAAATATAAATTTACCACTTAGAGTTAATTTTATGACTACATCTAGTTATGGAAACAATGAAGAAAGTACTGGAAAGGTTAAAGTGGTTTCAGATGTGACTACTGATATAGCAGGATATGATGTTTTGGTTGTAGACGATATTACTGATTCTGCACTTACTATGGATTTTGTGTTAAAACATCTAAAAGCTAAAAATCCTGCTAGTTTAAAATGCTGTGTTCTTTTGGATAAACCA…
HS-FS-000016-I-01_70_90	ATGAATCCTGTAAAAGAGCTAAACAACCTGTGGCATATTGTTAGTATGCAGATGAAAACAGAAATGTGTAGTGGTAAGTATCCTACTATTCATGGTATTTCTTTAGTAGAATTAAGTATTTTAGAAATAGTTGAACAGTATCCCAATAGTATGATGAAAGAAATTAGTGAAATTTTAGAATTGCCAAAAAGCACATTAACAAGTGCTGTAAAACGTCTTGAATTAAAAAAATTTATTAAAAAGAATCCCTGTATTAAAGACAAAAGGAGGTATAACTTAGTCTTAACTGAATTAGGTTTAAAGGCTCAACAAGAACATAGAGACATAGAAATAATTGTATTTAGAAATCTCTTACATCAATTAGATAAAGATGAAATAGAAACTTTTATTCGTATTTTT…
HS-FS-000016-I-01_65_207	ATGAAAATAAGAGCTGAATATACATGTCCTCTTGAAATTGTACATGACATAATCAAAGGAAAATGGAAAACTATCCTTATATTTGAATTAAGACAATCTAATAAAACATTTTCTGAATTGCAACATAATATTTATGGAATAAATCAAAAAATGTTGATTCAACAATTAAAAGAGTTACGTGATTTTGGGATTATTGATAAAATAAGTTCTGCTGGATATCCATTACATGTTGAATATTTTCTTACTAATCGTGGTAAAAAAATGTTAAAAGCAGTGGAAATAATGCAAGAAATAGGAATCGAATATATGCTTGAACATGGTCAACAAGAAATTCTAGATAATAAAGGAATTTGCTACAATAAGTAA
HS-FS-000016-I-01_70_137	ATGAATATAGTAATGATAAATGGTAGTCCAAAAGTAAATAAAAATAATTCACAGTATTTTTTATCTGAATTAAAACAACTTATTCAAAATGATAATAAAGTTTTTACATTTAAAGTAGATAGCACATCTAAGTATCCTGACGCTCTTAATGCCATACTTAATTGTGATAGATTAATAATAGCATTTCCTCTTTATGTAGATGGTATTCCATCTCATTTACTTCATTTTTTAGAGAAATGTGAAAAATTTTTAAAAACACAAAATAAAAAACCTATTCCAGTGTATGCAATAGTTAACTGTGGATTCAATGAAGGTGAACATAATCATTTGGCAATTCAAATGATAGATCATTGGTGCAAAAAAATCAACTTTACATGGGTTCAAGGTATTGGAATTGGA…
HS-FS-000016-I-01_70_111	ATGACGATTTCAGAAGTTAGTAAAAAATACGAGCTTTCAGCGGATACTTTACGATATTATGAACGAATTGGTTTAATACCACCTGTAAATAGAAATAAAAGTGGAATTAGGTCTTTTACAGAAGAAGATTGTGAGTGGGTTAATTTCATAAAGTGTATGAGAGGTGCAGGTCTTTCTATTGAGACATTAATTGAGTATGTAGCTATGTTTCAACAAGGGAGCAGTACTATCAAAGCTAGAAAAGAACTTTTAATAGAGCAGAGAAACCAACTAGCAAAAAGAATAGAAGAAATGCAAAAAACTTTGGAACGATTAAATTTTAAGATTGATAGATATGAAGAAGGTATTATTGAGAAAGAAAAAGTATTAAAGAGCAGTAGAAATAAGAAAATGGAGGCA…
HS-FS-000016-I-01_65_219	TTGAATTTAAATAATATAACGAATTACGTTCAAAGTATTTGCGAGAATATTTCTAATGTATTGGATGTAGATGTTACTTTAGTTACAAAAGATTTAACTAGGATAGCAGGTACAGGAATATTCAGAGGTAAAATAGGAGAGACAATATCAGAGAAGTCAGTGTACTCTCTTGTTTTAAAAGATGGAAAATCCTATGTTATAAATAAGGAAATAGAAGAGAACTGTAATAAATGTGCAAATAGAGAAAATTGTAAAGAATTAGCTGATATATGTACTCCTGTTAAAATGGGAGAACATATACTTGGAATCTTGGGTATAGCTGCGTTTAATGAAGAGCAAAAAGAAAAGATACTTTCAAAAGATAAGGAGTTAACTGCTTTTGTAAGGAGTATGTCTGAT…
HS-FS-000016-I-01_69_34	ATGAAGACGAATTATAAAAAATTAAATTTTGAATACAGAACGAAAATCGATAAGTATATTTTAATGGGAGGGTATTATGATAGTAAAATCTAG
HS-FS-000016-I-01_65_210	ATGTGGGATGGGGGGCGCTTGGAAGATATACAAAAAGTTTCCTCTAAAATTGTCGATAGCGAAAGTTGGAAAACAGAACTTATGTATCTGGCACAAGAAGCTGAACAAGATGGACGCACAGAAAATGCAATTGCTTACTATCGTATGAGTGAATTTTTTATGTATGATGGTGACCCTGATAAAATATCAGTCTACAAAAAAGCAACTACTCTATTCTACAACTACTACTCTGAATATTTCTCAAATGGAACTGTACAAATTTTTCATGTACCATATGAAAATATCACCCTACCTGTAATGTATGCAAAAGCGCAAGGCGAGGTAAAAGATGTTATATTGCTCCACGGTGGAAATGATTCTTACTTTGAAGAATTCTTTTTCCCAATGCTTTATCTTGCG…
HS-FS-000016-I-01_70_157	TTGAAAGTTATAATTAATGGCTATAATGGAACAATGGGAAGAGTTTTAGCAGAATGTGTAAAAAAAGATAATGAATTAGAGTTGGTTTGTGGTGTAGCTAGGTCTGCTGATGAAAAAGGTCATCATAGTGATACAAAGCTTTACAAAACAATGACTGATGTAACTGAAAAAACTGATGTCATAATAGACTTTTCACATCATGAGACTTTAGAGCCAATATTGTCATATGCTCTAAAAAATAATACACCTGTAGTATTAGCTACTACTGGATATGATGAAAATGACTTAAATAAAATAGAAGAAGCATCAAAAAACATTCCTATATTATTATCATCAAATACATCTCTTGGAGTGAATATATTAATAAAATTAGTTAAGGATGCTTCAAAGATGTTAGAA…
HS-FS-000016-I-01_70_83	TTGGAAGAAGTAATTGCAAAAATTATTACTATAGAAAATGGATTCAAAGAAATTGAAAACATTGCTAAAAAAATTGTAAAAAATAATGACTCAAAAAAGTGTTATTATCTATCAATCTACTTATATAGGTCAGAATATTATCAAGTAAGAGAATTGGCTGTGTTTATACTTGGTTTTATATCAGTAACTATTTCTGAAGCTTTGTTATTTTTAAAAGACAATGTGAGTAAAGATGAAAACTGGAGAGTACAAGAAATACTAGCTAAATCATTTGATTATTATTGCAGTGAAGTAGGATATGAAAAGGCACTTCCTGTTATAAAAGAATGGCTTAATTCTGATAGTCCAAACATAAAAAGGGCTGTGACAGAAGGTCTTAGAATTTGGACTAGTAGAGAC…
HS-FS-000016-I-01_69_50	ATGACAATACAAGATTATATGTTAGAAACACCAGTTAGAATGAGAGAAATTATATCTAATGCAGATAGCTTATTTAATGAAGTTAAGAGAGCAAATCTAAAAAAGATTATAATAACAGGTTCAGGTACTAGCTATCACTCAGGAGTGCAAGTGCAACCATATTTACAAAATTTATTAGATATAGATGTTGTGAAAATGTATCCATTTATGATAACTGAAGATACATTCAAGTTTGATAATGAAAATACCCTAGTAGTAGGTGTATCTCAAGGTGGGAGTAGTTATTCTACATACAACGCTATGAAGTTAGCTGAAGATAAGGGTTGTAAAATAGCATCTATGGCAGGTTGTAAGAATGCTTTAATAGATGAGATTTCTGATTATATATTAACAGTAAAT…
HS-FS-000016-I-01_69_178	ATGTTTGATATATCATTTTTCGAAATGTCAATATATGAAATAGCAGTTACTACAATATATATAATTAATTTCATGGTTATACTAAACCTTATCTTTAGAGAAAAAAGAAACATAAATACAACTTTAACATGGCTTCTTATATTAGTATTGATTCCTGCTCTTGGATTCATACTTTATATAGCTTTTGGCAGAAATATTTCAAAAAACAATATGTTTAGATTGAAAGAAAAGGATGATAAGATAATCAAAAGTAATATACTAGATACTCAGGTTAAACTCCAATCTACATCTGAAATTGATTCAGATATACATCAACATAAGGATATGATTTATGCATTGGCTAATTCAAATAATGCTCATTATACCAATAATAACGATGTGTGGATTTATGCTGAATCT…
HS-FS-000016-I-01_69_64	ATGAGTCTTAGTTTAGGAAATGCAATTGCTGTATCAACGAACTTTATAAAATCTAACCCAGCTGTACCTGTGTACAACGGAGAAGAAATATATGCAGTTATTTATCATATAGAAATAGGATATAATAATGGTGTATCACCTGATACCAAACAATATATAATAATAGACTATAAAGAGTTTGATTTATCTATGGATAAAAAAAATGAACTAATAAATGTTGCTAAAGAGTACTGTAAATCTAAAGGTATTGTAGAAAACGAAAACCTTGAAATAAACCTTTTAGACAATGAAGAAGCAGAGAACTTCTTAGAAAAGGTGTTTAATAACATGAAGGTTATAAGAGGTCTTATAACTAAAAAAGGATAA
HS-FS-000016-I-01_63_352	TTGAACTTATTAATTATTGAAGATGATATAAACTTAAATGAAGGTCTTTTTTATGCATTTGAGAATGATGGATTTAATGTATTTAAGGCTTATACAAAACAAGAAGGATTAAATATATTTAATAGTAAAAATATAGATTTTATAATCTTAGACTGCAATCTTCCAGATGGAGATGGATTTGATGTATGTCAAATAATAAGGGAAAAGTCAGATATACCAATTATAATGCTTACTGCAAGAGACTCAGAAATTGATGAAGTAAAAGGATTAGAAATAGGGCTTGATGATTATATTACAAAACCATTTTCTTTATCTGTATTAAAGGCAAGAGTCAAAGTAGCAATAAGAAAAAAATCGAATAATAAAGTAATATATTCCAATGGAATAAAATTGGACCAA…
HS-FS-000016-I-01_80_17	ATGAGAATAATATTACTTGGACCTCCAGGTGCTGGTAAAGGTACTCAGGCGGCAGGAATAGTAGAAAAATACAATATACCTCATATATCAACAGGAGATATATTCAGAAAGAATATAAAAGAGGGAACAGAACTTGGAAAAAAAGCTAAAGAATACATGGACCAAGGTTTATTAGTACCAGATGAGTTAACTGTAGGTTTAGTTACTGATAGAATATCTCAAGAAGATTGTAAAAATGGATTTATGTTAGATGGATTTCCAAGAAATGTAGCACAAGGAGAACATTTAGATATCTTCTTAAAAAATGCTGGTATATCACTAGATAAAGTTGTCAATATTGAAGTTGATAAGAGTATATTAGTGTCTAGAGCAGTTGGTAGAAGAATATGTAAGTCTTGT…
HS-FS-000020-I-01_65_27	ATGATGAGTAGTAATATAACTATTGAAATGGTTGATTCAGTCTTTGAAAGAGTTCCAGGAGCAACTTATGCAGAAGCAAAAGAAGCATTAGTAATGTGCAATGGAGATGTAATTGAGGCAGTAATATATTTAGAAAATAAAAAAAATACTTGTAATTGTAAAGCAAAATCTGCTAAAGAAACTATGGAAGAAGTATTTGGCAAAGATGGAGAAAATATAAAGTTTCAATTAAAAGAGCTTCTTAGAAAAAGTAGTGTAGTGAGAATAATAGTTGAAAAAGATGGAAAAACTATGATGAACATTCCTTTAACAGTTGGAGTTGTTGGATTAGCTTTTGTACCATTAGCTACTTTAGTTGGATTATCAGCTGCTGTTATAAGTAAATATCGTATAAAAGTT…
HS-FS-000016-I-01_63_255	ATGGGTAATTTAGTTATAGCTGTAGATGGTCCAGCAGGAGCTGGAAAAAGTACAATAGCCAAGATAGTAGCAAAAAAGCTAAATATAAATTATATAGATACAGGTGCTATGTACAGAGCAGTTACTTATAAGTGTTTAAAAAGTGGTGTTGATGTCAATAATGAAAAAGAAGTTATTCAAATAGCTGAAAATTCGGATATAGATTTTAAAGATAACAATATATATTTGGACAAAGAAGTTATAAATGAAGAAATAAGAACAATAGAAGTAAGCAATAATGTTTCTAATGTAGCAAAAATAAAAGAAGTAAGACAGTTGATGGTTGAAGTTCAACGAAAAATAGGAATGAAAAGTTCAGTAATACTAGATGGTAGAGATATAGGTTCATATGTTTTCCCA…
HS-FS-000016-I-01_64_130	GTGAAAGTAAAGTCAAATTTAGATGAAATTTTATATCATAAGATTATTGAAAGTCTTATTCGTGGTGAATACTCTGTAGGTCAAAAAATATTACTAAATGACCTTTGTGAAAAATTTGAAGTAAGCAGAACACCAGTTGTACAAGCAGTAAAAATGCTAAATAAAGATGGAGTGCTTACTATTATGACAAATGGTAAAGTGTACGTACCAGAGTATGAATATGATATGGTAAAACAAGTTTGTGAAACGAGAACACTGATTGAAACATATGCTTTAGAAAAAATGATGCAAGAAGAGGAAGAGGTTTTTCAACAAAAGCTAGATGTAATAAAAAGATACTCTGATAAATGCGAGGAGTACTATCGTCAAGAAAAATCTGTAGAACTTGCACTAGCAGAT…
HS-FS-000016-I-01_65_203	GTGAAATGTTCTAATTGTGGAAGTGTAAATATTGAAAAGGGTATTTTAACAACTGGTGGCATATATGCTGAAACTATTGGATTAAAATATAGAGGAGATGGAAAATTAGATAAAGTTATAAATAAAACTTTTCCAGTACAATCTACTATATATTCAGATTTATGTTTAGATTGTGGCGAAATAGTTAGAACCTATATAAAGGATAATACTGATAGGAATTGGTGTAAAGATAAGAAATAG
HS-FS-000016-I-01_69_77	ATGTTGAAATTGTTTTTAACCTTTTTAAAAATTGGTGCGTTTACATTTGGTGGTGGATACGCTATGGTTCCTCTTATACAAGATGAACTTGTAAACAAACAAAAACTTTTAGAGCAGGAAGAATTTATTGATTATTTATCCATAGCTCAAAGTTATCCTGGAGTACTGGCAGTTAATATATCTGTATTATTAGGATATAAACTTTATGGTATACCAGGAGTTCTTATATGTACCTTAGGCTCTGCTTTACCATCATTTTGTATAGTCTTAGTCTTATCGTATCTATACTTTAAAAATTCATCATCTAAAATTTTAGATGGATTTTTTAAAGGAGTTGCGCCTGTTGTAATAGCTCTTATATTGTATTCTTTTACGAGCATGTTCAAGAAACTACCAAAG…
HS-FS-000016-I-01_65_238	TTGAAATTAACAGATAGATTATTGAAAATAGCATCATTAGTGTCAGATGGTAAAAAAATAGCTGATATAGGGACGGACCACGGATACATACCAGTATATTTGTTAAAAGAGGGAAAAGTACCATTTGCAGTGCTAGCAGATGTTAATAAAGGACCTCTTGACAATGCACATAAAGAAGTCATACAGAACAATCTTTTAGATAAAGTTGATTTACGATTGGGTTCTGGTATAGAGATACTTGAAATAGGGGAAGTAGAAGAAGTGATAATTGCTGGTATGGGTGGAATCTTGATAAGTGAGCTTCTCGAGGCTAAAAAAGAAGTAGCACATAATGTAGAAAAATTAATATTACAGCCAATGCAAGCACAAGAAGAACTTAGATATTACCTTTTAAACAAC…
HS-FS-000016-I-01_65_201	ATGCAAAATCATAATTATATAAAAATGTTAAATAAAAAGGTAGAAGTATTATCTAAGGAATTAGATAGTAGAAATTTTAAATTAAAAACCTTAAATGAAATAGATTTTTTTTCTAAAATACCAAACAGAGAATTTATGTACCAATATATTGATGACTGTATTTCGAAAAATATACATATAGGAATCATGTTATTAAATATCGATAACTTTAAATTATTTAATGATATATATGGATATCTAGTCGGAGAAAATTTATTAATTACTCTAACTCAAAACCTATTGCACTTTATTCCAGAATCAAAGGGAATAGTCGCTTATTTAAAAGGAGAAGGTTTTTTAATTGTACTTCCAAATGTATCAAATAAAGAGTTAAATAATATGGGTGCAACTATTATAGAG…
HS-FS-000016-I-01_66_220	ATGATAAAAGTCATATATGAAGATAACCATTTATTAGTTGTAGAAAAACCAGTTAACATATTGTCTCAAGGAGATAATACTAATGATAAAGATATGGTAAATCTTTTAAAAGACTATATTAAAAAAAAGTATAACAAACCTGGAAATGTATATATTGGTTTAATACATAGATTGGATAGACCAGTAGGTGGAGTTATGGTGTTTGCAAAAACATCAAAAGCAGCATCTAGATTGTCTGAGCAGGTAAGAAGTAAGACTTTCAAAAAAACTTATCTAGCTGTTGTTCATGGCAAGATAAAATCTAACTCAGATATACTAAAAGATTTTTTATATAAAAATAAAAAAACTAATATGGTAACTGTAGTGAAAAAAAGCCATAAAGATGCCAAAGAAGCTGAA…
ERR028730_ST1_139_68	ATGAATAATAATGCTATAAGTTCTAAAAGTATAAGTCTTAAATCAAAAATGAATTTAGATATAAAAAAATGTATGCTTACAGTATTAGTTATGTCTTTAGTAATATTTTTATTAGCACCTATAATATATCTATTTGTACAGGCTTTTTTAGATAAAGATGGAGTCTTTGTAGGATTACAAAACTTTCAAGAATACTTGGCTTCTGAATCTCTATTAAATTCTCTAAAAAATACAGTATTTGTATCAGTTATATCAACTGTAATATCACTAACACTTGCATTAGTATATGCATATGCATTAACTAGAACAAAGATTAAATTTAAAGGTTTTTTTAAATCATTAGCTATGTTTCCTATGTTTGCTCCAACAATGATGCATGCAATAGGTCTAGTATATTTA…
HS-FS-000016-I-01_66_165	ATGATTGATGTAAAAAAACTGTATTTTAGTTATACTGACAAACCGTTTGTTGAGAATGTAAGTTTCCATGTTGGGAGAGGAGAAATTTTCGGTTTTTTAGGACCCTCTGGTGCTGGAAAATCAACTATTCAAAAAATTTTAACTGGGCTTAATACAAGTTATAAAGGCAGCGTAAAAGTTGCAGGTACAGAAATAAGGGAGCATACAAACCGGTTTTATGAAAATATTGGAGTAGACTTTGAATTTTCAACCTGCTACGAGAAATTCACAGCACGACAAAATCTCGCCTATTTTGCTTCTCTATATGACAAGCAACCTCGGTCTATTGATGAATTATTGCATATGGTAGGCTTAGAAAATGATGGGGACAAAAAAGTTGCTGACTTTTCCAAAGGTATG…
HS-FS-000016-I-01_74_76	ATGGTGTATATTGAGTACTATGTTATAGAAAACCTAGTAATAAATTATATTATTATAAGTTGTACTTCTATTCTTACTAAAAGATATAATCCTAAAAAAAATAAGTTATTGGGGGCTAGTTTAGGAAGTGCCTATTCTGTTGCTTATTTGTATCCATCAATGAATATACTATTTACTGTACCATTTAAAATAATAATCATGAGCATAATAACTTTAATTTCATTTAGAAGCAAGAGCAAAAAAGATTATGTTCATGTAGCGTTAGTTTTTTATCTAGTAAACATTTTTATTTCTGGAAGCACTTATTTTATAATTTATTTTACAGGAATAAGTCACTTAAAAATATCTTTCTTAATTGCATGTACTTATGTGAGTTGTGAATTATTAAAATACATTTAT…
HS-FS-000016-I-01_71_19	ATGAGTAAAATAAATGTCTCTAAAAGATTAGAAAATATAGACAAGCAAGTATTAATAGGAAGAAATATCAATCTTATTTATGGAGATGGGTGTGAAAAGTGTTTTGAAAGCACAGGATATGAAAGCAATAATATATGTAAGTATTGTGGTTCTATAGTTGCATGTAATAATGTAAATTTAGAACTTTATGAAGGAGAAGTCCTTGGAATTGTAGGTGAATCTGGTTCAGGAAAAAGCACTTTATTAAAAATACTGTTTTTCCAAGAACATGCAAATAGTGGAGAAGTATATATATCCCATTACAATAAAGACACAAATATACTAGAGCTTTCAGACCAAAAAAAGAGATACATAAAGAATCATTTTATGGGTATTGTGTATCAAAATCCCCACCTTGGT…
HS-FS-000016-I-01_68_197	ATGGGAAACATAGTTGTCATAGGAAGTGTAAACATGGACATGGTATGTTCTGTAGATAAAAGACCAGAAAAAGGAGAAACAGTATTAGGTAATAGTTTTTTTACATCACCTGGAGGGAAAGGGGCTAATCAAGCTATCTCAGCTTCTAAACTAGGAGCAAATGTAAAAATGATATCATGCATAGGGGAAGATGGCTTAGGAGAGGAGTTAATAAGAAATTTTAGAACGAATAAAGTTGATTATAGTTTAGTATCCAGAAATAATCACAAAAGTTCTGGTGTTGCTGTTATAACATTATGTGAAAATGATAATAGTATTGTTGTTGTACCAGGGACGAATGAGCTAGTAGATATAGAATTAATTAAAAAGAATGAAGAAGAGATAAAGAATGCAGATATA…
HS-FS-000016-I-01_64_162	ATGCAACTATATAACACCCCCTTTAATACAAACAAACACTTAATCTATTTCTTTACATCTACGCTAGTATTGAACTGGATATTCAGTCTTACACCTGCGTTGCTCGGAATTACAAATACAATACTTGGAGAAATCATTTTTTATCTTGCATATACATCACCAGCTATTGTAGGTCTATTTTTTATTTCTACAATCTATCCACAAAGTGCAAAACAAGATTTTATTTATAGATACCTAAGCTTTAAAGAAATTAGAATAAAATGGATACTATTAACAATATTATTTTTTGCTTTAACTTTTATTACTTCGTTAATAATCGGAAATTACTTTAATGTAAAAACTTCTGATATAGATTGGATACACATAGCAGTGTTTAGACCTTCTAAAATAGCTTATATG…
HS-FS-000016-I-01_67_165	ATGCTAGAAGGAAAAATTATAAAGGGGATTAGTGGATTTTATTATGTAGATACTTATAATGGTATTTATGAATGTAAGGCTAGAGGGATATTTAGAAAGCAGAAAATAACACCTTTGGTTGGTGATAGAGTCAAAATAAGCATTGTTGATGAAGATGAAAAAAAGGGTATCTTAGAAGAAATCGACAGTAGAGATACAGAACTTATAAGACCTCCTATTGCAAATGTAGATAAAGCATTAATAGTATTCGCAATAAAAAATCCTAAACCAAACTTATCTCTTTTAGATAGATTTATAGTTTTGGCAGAAAAAGAAAATTTAGAAACTGTAATAATCCTTACAAAAGCAGATTTAGATGATAATGATACATTAGAAACTGTTAAAAATATATATGAACTT…
HS-FS-000016-I-01_63_195	TTGTATAATAAAATAAAATATATTCCAATAAATTGTGAAATAGCTTGTAATAAATTAAAAAGGAGTATGCCATATAAATGGGATTTAAATATTTATCGTGGATGTGAGCATGGATGTAAATATTGTTATGCTATTTACTCTCATAAGTACATTAACTCCAATAATTATTTTGAAGAGATTTATGTAAAAACAAATATAGTAGAAAAACTTGAGAGACAACTTAAAAGCAGTAAATGGAAGAAAGAAGTAATCAATATAGGAGGAGTTACAGATAGTTATCAACCAATAGAAGCTGACTATAAAATTATGCCAGAAATATTAAACCTGCTGATAAAATACAAGACACCAGCTATTATTTCTACAAAGTCAGATTTAATTTTAAGAGATTACGATTTAATT…
HS-FS-000016-I-01_82_11	TTGGAAAGTCTATTAGAGAGGGAATATAATTTTATGAAATATAAAGGGATTATATGTGCAATGATAACACCATTTGATGAAAAGCAAAATATTAATTCACAAGCAACATGTAAATTAATTGATTATTTGATTGAAAAGGGGATTTATGGATTATTTATTTTGGGTACTAATGGTGAATGTCATGTGTTAACAGATGATGAAAAAGTTGAATTTGCAAAGATTGTTATTAATCATACAAATAATCGTGTACCTGTTTTTGTTGGAACAGGTGGTAATTCAACTCGTGAAGTTATAGATTTATCCAAGAGAATGGAAGCGATTGGAGCAAGTGCATTATCTATTATTACACCATACTTTGTTACACCAACACAACAGGAATTAATCTTACATTACAAAACT…
HS-FS-000016-I-01_82_43	TTGAATAATAAAATTAGACTATCTAAGGCAATGTCTATAATAGTTTTAGCTATAATAATCGCTTTAGTAATAGCCTATATTCCAATGCTAGGAATATTTAGTATGTTAGCAGCTGTTCCATATGTAATTATAGGTGCTATTACTGATAGAAAGTATTCTCTTATATCTATTTTGGTTACATTTTGTGTACTGATTCTATTTGCAGACATTTCTTATGCATTAAATATATGTATAATGTATTCTTTACCAGGTATAGTAATAGGAAAGATGCTAAAGAGAAGCTTTGAACAAGAGGACAGTAATAAATTCGAACCGATATATGGTGGAACCATAATATTTGTACTTTCAATGCTTGTATATTTTTTTGTATTAAAGACATTTTTAAATGTGAATCTATTA…
HS-FS-000016-I-01_64_125	ATGGAAAATATTTTAGAAGTTTATAACTTAAATAAGACTTATACCAATTTTTCATTATCTAATATAAGCTTTGTATTACCAGAAGATTGTATAACTGGATTTATAGGTGTTAATGGAGCAGGAAAAACAACAACAATTCGTTCGATATTGGATGTCGTAAAGCGTGATAGTGGAAAAATAAAAATCTTTGGTAAAGATTTCGATGGAAATGAGAAGGAATTAAAAAATCGAATTGGAGTTGTATTTGATGATTCATATTTCTATGAGGAGTTGTCAATGTCAGAAATGAAAAGTATTATTGCACCTTCATATGATAATTGGTGTGAAGAAGATTATCAACAAAATATGAAGCGTTTTAATCTTAATCCAAAACAAAAGATTGATACACTTTCAAAAGGA…
HS-FS-000016-I-01_63_619	ATGGAATACGATATGCCACTTTACAGACCACCAAGTGAGGCTTATAGTCTTATAATACAAGTCACACTAGGATGTTCTCATAACAAATGTACGTTTTGTAGTATGTACAAATCTAAAAAATTTAAAATAAAGCCACTAGAAGTAATAAAAAATGAAATTGATATATTTAGAAGATATTATAAGCATGTAGAAAGAATATTCTTAGCAGATGGAGATGCATTGATAATACCAATGGAGAAATTAAGAGATATTATTTTATATATAAAAGAAGTTTTTCCAGAGTGTGAAAGAATTACTATGTACGGCTCTCCTAAATCTATAGAGAAAAAATCTGATGATGAACTTAAAGAATTAAGAAAACTTGGTGTTAAAATGATTTATCTAGGGCTTGAAAGTGGA…
HS-FS-000016-I-01_63_427	ATGATTAATATAGAAAAAGCAAATACACTTATAGAAGCTTTACCATATATAGAAAAACATCAGGGAAAGACTATTGTAGTTAAGTATGGTGGAAGTGCAATGAAAAAAGATGGTCTAAAAGAATCTGTTATGGAAGACCTTGTATTAATGAGTTATGTTGGAATCAATATAGTTTTAGTACATGGTGGAGGGGCAGAAATCAATAAGATGCTAGCAAAAGTGGATATAGAAAGTAAATTTGTAAATGGTCTTAGATATACAGATGAAGAGACCATGGAAATTGTAAAAATGGTACTTGCTGGAAAGGTTAATAAAGACCTAGTAAATAAAATACATACAAAAGGTGGAAAAGCAGTAGGGCTTTGTGGAATGGATAATAATATGATTTTATGTGACCCA…
HS-FS-000016-I-01_71_136	ATGAGTTTATTAGAAAGTATATCAAAAAACATATATTCCCTAGATAACTCTTCTATTGAAAAAACAAAGCAGAGATTGGATAGGCTTATACATCCAACTGGAAGCTTAGGAAAGATAGAAGATATTTGCATGCAATTGGCAGGAATATTTGGCAATGAAAATTTTGACACAAGTAAAAAGGTTATAATTGCTTTTGCGGGAGACCATGGTGTATATGAAGAAGGCGTAGCACCTGACCCTCAAAATATAACAAAATTACAGTTTCCAAATTTTTCGAAAGGTCTATGTGGAGTTGGAGTAATAAGTAAATTTGTAGGGGCAGATGTTGTAGCTGTAGATGTAGGAATAAACTGTGATGAAAAACTGGATGGGGTATTAGACTACAAGATAAGAAAAGGG…
HS-FS-000016-I-01_63_542	ATGAGCAATATAAAAATAATAGCAAGTAATAAATGTTGGATTGAAGATATAGCAAGGAAACAACTAGAAGATATTTCAAAGTTAAATGGAATTTTAAGAGTAGTAGGATTACCTGACTTACATACAGGTAAAATACCTGTAGGTTTAGCAGTTGAGACTAAAAATATTATTTATCCACATATAATTGGAAATGATATAGGATGCGGAATGACTTTATTTAAAACTGGGGTTCTAAAAAAGAAATTTAAAAAAGACAAATGGATTAAGTCACTTAGTAAGATTAAAGATTTGTCCGATATAGAAATAAAAAACACATATAAAGAAGAATGTCCAATTTTAAATTTAGGAACTATAGGGAGTGGAAATCATTTTGTAGAAATTCAATGTATAAGTGAAATT…
HS-FS-000016-I-01_67_69	ATGAATTACAAGGATATTATAAGGAATGTAAAAGAGAAAAACTTTGAAAAAATGTATCTTTTTTATGGAAGAGAGTATTATTTAATTGAGAATGCAATAAAAGCATTTAAAGATAGTCTAAACGAAGGAATGCTTGATTTTAATTTAGATATAATAGATGGGAAGGAAATAGTCTTAAATCAGCTTATAAGCTCTATAGAAACACTTCCATTTATGGATGATAGAAAGATAGTAATAATAAAAGACTTCGAACTATTAAAAGGAAAGAAAAAGAATTTTACAGATAGTGATGAGAAATACTTAATAGAGCATTTAGATAATATTCCAGACACTACAACTATAGTTTTTGTTGTATATGGAGATGTAGACAAAAGAAAATCATTAGTTAAGAAAATAGGA…
HS-FS-000016-I-01_63_136	GTGAATCAAAAAGAAAAAGATATTTATTATATGAAAAAAGCTATTGAATTGGCTAAAAATGGAGAAGGCTTTGTAAATCCAAATCCATTAGTTGGGTGTGTAATTGTTAAAGATAGTAATATAATAGGCAAAGGATATCATGAGAAATTTGGCTCTAATCATGCTGAAGTAAATGCTATAAACAGTGCTAAACAAAGTCTAAAAGACTCTACTCTTTATGTAAACTTAGAACCATGTTCTCATTATGGGAAAACGCCTCCTTGTGTAGATAAAATTATACAAAATAAGATTAAGAGAGTTGTAATATCTACATTAGACCCAAATCCACTTGTTTGTGGTAATGGAGTAAAAAAATTAAAAGATAACAATATTGATGTTACTGTGGGAATATTAGAAGAT…
HS-FS-000016-I-01_82_69	GTGAAACTTAAAAGTTTGCAACTTGTTAATTTTAGAAATTATAAAAAGTTGCATCTGGAATTTAATGGGAAAGTAAATCTACTTGTTGGTAAAAATGGTCAAGGAAAGACAAATATAGTAGAATCTATTTATATGCTTTCTTTTGGAAAATCATTTAGGACTAACAAAGATAAAGAAATGGTTAGATTTAATAGTGAAAACTTATACATTGGAGGAAGTTTTTCAAAATATAATAAATATAGTCTAATAGAGCTAATTATTGGAAAAGATAAAAAGGGGATAAGAATAAATAAAGTTCCTTTACAAAAGATACAAGAACTACTTGGCAACTTAAATGTTGTTATATTTTCTCCTGAAGATTTAAGGTTGGTTAAAGAGGGTCCTAAAGAAAGAAGGGCA…
HS-FS-000016-I-01_68_117	ATGAAAGGAATTATTTTAGCAGGAGGGTCTGGTACAAGACTATATCCTATAACAAAATGTATATCAAAACAAACACTTCCAATATACGATAAACCAATGATATATTACCCTATGTCGGTTCTTATGTTGGCAGGGATACAAGATATATTAATAATATCTACACCAAGAGATATAAAAGCATTTGAAGAATTATTTGGAGATGGAAGTTCACTAGGGCTTAAAATAACATATGCAATTCAGGAGAAAGCAAATGGAATTGCAGAAGCGTTTATAATAGGAGAAGAATTTATAGGAAATGACAGAGTGTCTCTTGTATTGGGGGATAATATATTTTATGGATATGGATTTAGTGAAAGGTTGGAGAATGCAGTTAAAAGAAAAGGAGCAACTATATTTGGG…
HS-FS-000016-I-01_67_179	ATGGCTATAAGTATGACTGGTTTTGGAAGAGGAGAATACAAGGATGATAATTATTACTTTTTAGTAGAGTGTAAAACGATAAATCATAAGTATTCAGATATAAACATACGTCTTCCAAGAAAAATTTCATTTTTAGAGGATAAAGTTAGAAATTTAGTAAAAAATTATGTAAAAAGAGGAAGAGTAGATTTATACATAAAGTTTGACTTATTAGGCAAAGAAGATGTAAACTTAAATTTTGATGAGGGATTAGCATCTCAGTATATAGACATACTAAAAGAAATAAAAAATAAATTTGATATTATAGATGATATTAGCGTTATGAATGTTGCAAAGTTTCCTGATATTGTGAAAATAGAAGAAAAGGAAGAAGATGAAGATTTATTGTGGTCAATGTTG…
HS-FS-000016-I-01_73_99	ATGATAAGTAAAACTGAAAAGAAAAATAAATGCCTAGGTAGTGTAGCTTTTTTAGTTTTACTAATGGGCATAACAGGATATTTTGTTTTTAGAGGGCAGTCAGTTGAATCATTGATAAAATCATTAAAAGGTGCAAGCCCTATGTTTATACTAATTGGATTTGCAATGATGTTTATATATGTTGCCTGTGAAGGTATAAATATATACTTAGGTATGAAAGCTTTAAACCAAAAAACTACTCTTTTAAAATGTATGGGATATGCTTTTATTGGATTTTATTTTAGTTCTATTACGCCTTCAGCATCAGGTGGTCAACCAGCACAAGTTTATTATATGAAAAAAGACGATATAAATATATCATATTCTTCACTTATACTATTAGTCATTGTTGTTATTCAC…
HS-FS-000016-I-01_79_19	ATGAGTCAAGTTTCAAAAAATTATTTTACAACTGGAGAATTTGCAAAGATTTGTGGAATCAATAAAAAAACACTTTTCCATTATGATGATATAGGTCTTTTCTCACCAGAATTAAAGAAAGAAAATGGATATAGATACTACTCATACCATCAACTTAGCATTTTTGGTATAATTTCTTCACTTAGGGAAGTAAAAATGCCTTTAAAAGAAATTAAAGCTTATATAGACAAAAGAACACCTAATTTACTAATTGAGCTTTTAGAAAAGAAAACCATTGATATTAAAAATGAAATTGAAAAACTAAATAATATTCAAGCTCTAATGGAATCTACTATTTCATTCACTAAAAATGCCTGTAATATAGATGCGAATACTATTACTTTAAAAGAACATGAGGAA…
HS-FS-000016-I-01_80_65	GTGAAAGTTTATAATACATTGACTAGAACAAAAGAAGAATTTGTTCCATTAGAAGAAGGAAAGGTAAAAATGTATGTGTGTGGTCCAACAGTTTATAACTATATACACATAGGTAATGCAAGACCATTTATAATATTTGATACTCTAAGAAGGTATTTAGAGTATAGAGGATACGATGTAACTTATGTACAAAACTTTACAGATGTTGATGATAAGATTATAAATAGAAGTCATGAGGAGGGAATATCTCCTGAAGAAGTTGCGGCTAAGTATATAAAAGAATATTTTGTAGACTGTGATGGGCTAGGGATAAAAAGAGCTACTGTTCATCCTCAGGTTACAGATAATATACAACAGATTATAGAGTTTATAAAAGAGTTGGAAGATAAGGGATATGCA…
HS-FS-000016-I-01_65_255	TTGAACTTAAGTACTGGAAATCAAAAGGTCAGTAGATTAAAGAAAAAAGAAAAGCCTAAAGATTTTAAAAAAACGTTTAAAAGAATTTTTATGTACTTTAAAAAAGATAAGAAGATTACTAGATTTATTTTTTTGCTAGTAATAATTGATTCAATTATATCAACTGTAATACCATATACTATTGGAAAGGTAGTTGACATAATAGATATCGATACTTATTCAAAATCCATTTTCTTAAAAGGAATAATTATTTTACTTTCATTTTATATAATTGAGTTTTCAGTTAAACTGTCTAAGGGGATATGTACAGCTAGATTATCTCAAAGTATAGTTAAAGAAATGAGAAGTAATTTATTTTTAAAATTTAAAAATCTACCAATAACCTTTTTTGATAAAAGT…
HS-FS-000016-I-01_84_43	ATGAATTATAAAAAAACTGCCATTGACATTATTGAACAAGTTGGTGGTTCAAAAAATATTTTAGCTTTAGAACACTGTTCAACTAGACTACGCTTTAAGTTGATTGATAGAAGTAAAGTCAATCAGGATGCTTTAAAAAAAGTACAAGGTGTTATGAGTATAGTTAATGGGGCACAATTTCAAGTTGTCATTGGAAATAGTGTTGTTGATGTGTATGATGAAATTTTAAAAGTTTGCCCTTTAGATACAAATGATAGTACTGTAAAAACTGAAGAAAAAATAAACTTAGGAACAAGATTTATAGAATTTATTATTAATATTTTTCAACCACTGATTTTTGCTATTGCAGGAGCTGGTATTTTAAAATCACTGTTGATGTTATTAGCAATGTTTAATATT…
HS-FS-000016-I-01_84_5	ATGAATGATTTTGTGATTGAAACAAAGCAACTTACAAAAATTTATGGGAATCAAACAGTAGTTGACAAAGTCAATCTCCATGTAAAAAAAGGCCGAATATATGGTCTGTTAGGACGCAACGGAGCTGGGAAAACCACAATTATGAAAATGATTTTAGGATTGACTTCAATCACGTATGGCGAGGTAGATGTATTTGGAGAGAATATTAAGGGATGTGAAAAACGAGTATATCCCCGTATCGGTGCAATTATCGAAACGCCAGGATTTTATCCTAATCTGACAGGAACGGAGAACTTGGAGATTTTTGCAAAACTTCGTGGTACAGCCGCCCCTAATTCTGTAAAAAGAGCATTGGAGATTGTAGGCTTACCTTATAAAAATAAAAAGCTGTTTAGTAAA…
HS-FS-000016-I-01_63_564	ATGAAAAGTTCTAATTTTAATATATTGGCATTTGATGGTGGTGGATTAAAAGGGGCATTGAGTATATCCATACTTGAGAGGATAGTAAAAGAGTATCCAAATCTATTAAACAATATAAATATGTTTGGAGGGACATCTACAGGGAGTCTAATTGCACTAGGACTTGCGTATGGTGTAAGCCCTAAAGAGATAAAAGAACTTTACTCAATTGAAAATTCTAAGTATATTTTTAATAAAAGTTATGCAGAAATACTCAGACCAAAGTATGAAAACAAAAACTTAAAAGAAGTTTTATTAAGTATATTTCCAGAGGAACTAGAATTAAAAGATTTAAATAAATTAGTAATGATACCAAGTTTTTATATAGGAAATGAGGAAAATGCATGGAAACCAGTGTTT…
HS-FS-000016-I-01_63_100	ATGCGTGTACTTAATAATGTTACAGAGGCTATAGGCAATACTCATATGTTACATTTATCCAAAATAGCAGATGAATTTGGAGTTCAAGGTAATATTTATGCAAAGATGGAATACTTAAATCCGGGATTTAGTAAAAAGGACCGTGTAGCATTACAAATGATTACCGAAGCAGAAAATGCAGGTTTATTAGTTCCAGGTCAAGCAGTTGTGGAATTAACAAGTGGTAATACTGGAACAGGACTAGCAATAGCTTGTGCATGTAAAGGATATAAATTTATAGCGTGTATGTCAAAAGGAAATTCTATGGAAAGAGCAAGAATGATGAAAGCTTTAGGTGCTGAAGTAGTTCTTGTAGACCAAATGCCTAATTCAGTTCACGGACAGGTATCTGGTGAAGAT…
HS-FS-000016-I-01_77_92	ATGGGAATAGCAACTAGAGAAGCTTACGGACAAGTGTTAAAAGAACTTGCAGAAAATAAAGATATAGTAGTATTAGATGCAGATTTAGGAAAAGCTACAAAAAGTATATCATTTAAAGAAGTTGCCCCAGATAGATTTTTTGACATGGGGATAGCAGAAGGTGACATGATTGGTACAGCAGCAGGTCTTGCTACTTGTGGAAAAATACCTTTTGCGAGTACTTTTGCAATATTTGCAGCAGGAAGAGGCTATGAGCAAATAAGAAACTCTGTAGCATATCCAAATTTAAATGTAAAAATAGCAGCTACTCATGCAGGTGTAACAGTAGGTGAAGATGGTGGTAGCCATCAAGCTATAGAGGATATATCTCTAATGAGAGGTATACCAAATATGGTTGTA…
HS-FS-000016-I-01_66_36	TTGAAAAAATACTTTGGAGAAATAGGACTAATATTTATAGCAATTATATGGGGAAGTGGCTTTGTAGCAACCCAATTTGCATTAGACGGTGGGCTTACACCTCTACAAATCATAACTTTAAGATTTTTCTTGGCAGCTATAATTATGAATTTACTGTTTTTTAAACAGATTCGTGCCAATATGGGTAAAAAATTATTAAAAGCAGGAGGGATTTTAGGAATATTTTTATTTCTAGCATTCACAGTACAAACTATTGGACTTATGTACACTACACCATCTAAAAATGCATTTATAACAGCAGCTAATGTTGTAATAGTTCCGTTCATAGGATTTATACTTTATAGAAGAAAACTTGATAAAATAGGAATAATAAGTAGTTTGGTAGCTCTTATAGGAATT…
HS-FS-000016-I-01_64_70	ATGTTAGTATCTTTAAAATGGCTTAGAGACTATGTTGATATAGACATGGATGTAAAAGAGTTCGCTGATAAAATGACAATGACAGGAACTAAAGTTGAAACAATAGATTATTATGGTGAAGAAATAGAAAATATATTGGTTGGAAAGATTTTAGAAATAAAACAACATCCAAATGCTGATAAGTTGGTTGTAACTAAAGTAGATATTGGAGATAAAGTTGTTCAAATAGTTACAGGAGCTACAAATATATCAGAAGGAGATTATATTCCAGTAGCTGTAAATGGTTCTAAGTTACCTGGAGGAGTTGAAATCAAACAGACTGATTTCAGAGGTGAATTATCAGATGGTATGATGTGTTCAGCAGCTGAACTAGGTATAGATGAACATTACATTGAGGAG…
HS-FS-000016-I-01_68_77	ATGTTAAAATCAAGAAATTTAATCCAACCAGAAGACTTTTCAATAGAAGAAATAGATGAAATATTAGAATTAGCTCAAAAAATAATTGACAATCCGTCAAAATATTCTCGTATATGTGAAGGAAAACTATTAGCTACATTATTTTATGAACCATCAACAAGAACAAGATTAAGCTTTGAATCTGCTATGAACAGATTAGGAGGACGTGTAGTAGGCTTTTCAGAGCCAAATTCATCCTCTGCATCAAAAGGTGAAACTCTAGGAGATACAATGAGGATAGTATCTGGTTATGTTGATATAATAGCTATGAGACATCCTCAATCAGGTGCAGCTTCAGAAGCAGCTAGATATACGGAAGTGCCATTTATAAATGCAGGAGACGGCAAAAACCAGCATCCA…
ERR026357_ST1_768_16	ATGGAATATAAATATACAAAAATTGATTTAGAAAAATGGAATAGAGGTAAATTGTTTCAAAGTTACATTGATGATATGCGTATCGTTATGAGCTTAACCGTAGATATTGATGTAACAAATCTAATTGAATTTTCAAAAAGCCATGATTTGAAATTTTATCCAGCTATGATATGGGTTGTTTCAAAGGTCGTTAATGAACATGATGAGTTTAAATATAGTTGGGACAATAAAGGTAATTTAATTAAATGGGACTATATTTCCCCGTCCTATGCTGAATTTCATAAAGAAGATGAGAATTTCACAAAAATGGTTACAGATTTTTCTGATAGCATATTTGAATTTCATGAACGATTTATGTTAGATAGAGAGAAACATAAAATGGAACGTGCATTCGTAGCA…
ERR026368_ST1_247_6	ATGATTGCCAATAGAAGTGTTTTTAAATTCGGTGACAATATAGATACAGATGTAATAATACCAGCTAGATATTTAAATATAGCTGATTATAAAGAACTAGCAACGCATTGTATGGAGGATATTGATGATAAATTTATTTCTAAGGTAAAAAAAGGAGATATTATAGTTGCAACTAAAAACTTTGGTTGTGGTTCATCAAGAGAACATGCACCAATTGTAATAAAAGAAAGTGGAGTATCCTGTGTGATTGCTTCTACTTTTGCTAGAATATTTTTTAGAAACTCTATAAATATAGGGCTTCCTATACTTGAATGTGAAGAAGCTGCCAATAACATAGATGAAGGGGATAATATAGAAGTAGATTTTTCTACAGGTGTGATAAAAAATATAACAAAAGAA…
ERR026374_ST1_188_9	GTGATCGTGCAGAGAGCAATAGAGGAAGCTGGAATACCTACAATAATAATAGCAGCTCTTCCTCCAGTAGTTAGACAAAACGGAACTCCTAGAGCAGTTGCTCCATTAGTTCCAATGGGTGCTAATGCTGGTGAACCACATAATATAGAAATGCAAACACATATATTAAGAGATACATTAGAGCAATTAGTTGCAATACCATCTGCTGGTAAGATAGTTCCATTACCATACGAATATAAAGCTCACGTTTAA
ERR026357_ST1_764_9	ATGTTACAAGTTACAGGTGTTGGACTTAGATTTGGTGATAAGGAACTATTTAAAGATGTTAACTTAAAATTCACTAAAGGTAATTGCTATGGAATAATAGGAGCTAATGGTGCGGGAAAATCTACTTTTTTAAAAATATTATCAGGAGAAATAGAGCCTAATACAGGTAGTATATCTATAACTGATAAAGAAAGAATGTCAGTTTTAAAACAGGACCACTTTGAATATGAAGAAGAAACTGTTTTAAATGTTGTTATAAGAGGTCATGAGAGACTTTGGAACATAATGAAAGAAAAAGATGCATTGTATATGAAGGAAGACTTTAATGAAGAAGATGGGATAAAAGCTGCCGAACTTGAAGGTGAGTTTGCAGAGCTTGACGGATGGGATGCAGAAACT…
ERR026357_ST1_738_20	TTGTTGGATTTATATAAAGATGTTCAATATGTTAAGGGAATAGGACCTAAAAAAGCAGATAAATTAAATAAACTGGGTATATTTACACTAAAAGACCTATTGTATTATTTTCCAAGACAATTTGAAGATAGAAATAATCTAAAGAAAATAGCACAATTAGAAGATGGTGAGAAAGTTACGATAAAAGCAGTAATATCAAGTATAAATACATTTAGCCCAAAAGAAGGTATGACTTTAACAAAGATTGATGTAAAAGATGAGACAGGCTCGGCTAAATTAGTGTTTTTTAATAAAAGTTATATAAAAAATACTTTTCGTCCAGGAGATTCAATATTAGTTTTTGGGAAGGTTAAGAAAAAATTTAATAACTTAGAACTTACATCATGTGAATTAGAATAT…
ERR026357_ST1_765_14	ATGGAAGAATTAATATCTAAGAAAGATTTATTGAGCAAAACTAATATATCTTATGGTCAATTATATAGATGGAAAAGAAAAAACATAATACCAGAGGAATGGTTTATAAAAAAATCAGCTTTTACAGGTCAAGAGACTTTCTTTCCAAGAGATAAAATACTAGAAAGAATAGAGTTAATATTGTCTATGAAAGAGGAGACTTCTCTTGATGATATTGCAAATATGTTTATGAAAAAGGATATTAATAAGGAATTTGACATTGATTTTATTCTCAGTAAAGAAGTTATATGTAATTATACCAAAGAAATATTTCAAAATTTATATAAAAAAGAGCAAAGCATAGGTAAAAAAGAACTGCTTATATTGAGCATAATAGAGAAGTTTTTAGTTAAATCTATA…
ERR026357_ST1_726_29	ATGAATAATAAATATATAAGAACTGTTAACAGGGAATTTGAAAAGAGTAGCTTTTGGCCAACATTTACAGATTTATTATCTACTGTATTGATGGTTGTGATTCTTATCTTATTTAGCTCAGAAAGTATTTCAGGTTCTGTTGAACAAGATTTAGCTAAGAATGTCAATGCTTCTGTTGAAGAAACTTTTAAAAAAAGCAAAATACCTGTGAAGGTAGATAAATCTAATGGGCAAGTAACTTTTGGTGAAAAAACCATGTTTGATGTAGATAGTGATGTTTTAAAACCAGAGGCTAAAGAAATGCTAAAAATGTTTGTTCCAAAGTACATAGAGACTATTTATAAAGATTATGGTGACTATATATCCAAAATAGTTATAGAAGGTCATACAGATGATGTG…
ERR026353_ST1_813_50	ATGCTTTCGAAAAACGAGATGTATATTGTAGATATAGTAGACATTGGTCAAGGCGGAGTAGGAGTAGGAAAGTACAATGGTATTACAGTTTTTGTAGAGGGCGGATTAATACATGATAAAGTTAAAGTTAGGATTAATAAAGTAAAGAAAAATTATGCTGAGGGAGATATTGTTGAGATAATAGAAAAGTCTCCATTCAGGGTGAAAAGAGTGTGTAGTGACAATCTTAGGGATTGTGGAGGGTGTCAGATACAAGATTTAGATTATAATAAACAACTTGAAATGAAAACAAATGAAGTTAAACAAGTACTTTCGAGAATAGGTAAGTTAGAGGATGTAGAAGTTCATGACACTATAGGAATGGATAATCCATATAGATATAGAAATAAAGCACAATTT…
ERR025350_ST1_164_17	ATGGAAGATAAATTTTATGCAAAAGGCAACGGAAATAACGGATATATTAAAAATCTTGAAGTTTGTTCCTTTAATAACTTAGATGGAACTTGTGGAATGTTTCAAATGGCTCTGTACAAAAGAGATGAAAAATACTATTTATATGGATGCTGTTTTGGAGGAAATAAAAAAAATGGAGTAATGATTAGCGATATTACAGACCCTTATAATCCACAATTTATAAAACATTTTCAAATGTTAGACCCTAAAGAGTATCCTACAACAACAACTCCAAAAATTCAAATAGCAGATGATTTAATGATAGTAGCAATGAGTTGTGGAAGTGGACCAGGAGCACTTGTTGACCAAGCTAAATTAGCAAATATTAAGTGTGAAGCAGGAATTAGAATATACAGTTTA…
ERR025343_ST1_146_43	ATGAGAATACCAAAACATGTAGGAATTATACCGGATGGAAATAGAAGGTGGGCAAGTCAAAATGGTATGACAAAAGATAAAGGATATGAAAGTGGAATAGACCCTGGATTAGAGTCTTATAGATTATGTAGAGATTTAGGCTGTGAAGAGGTGACTTTTTATGGATTTACAACTGATAATACAAGACGTCCATCAGTGCAGACAAAAGCTTTTACAAAAGCATGTATTGATGCTGCAAATATATTAATAGATGAAGGTGCTGCTTTATTAGTTGTAGGAAATACAAAATCTCCAATGTTTCCAGAAGAATTATTACCATATACTAATAGAATTAAAGCCAAAGAAGGTCAAATAAAAGCAAATCTTCTGGTAAATTATGGGTGGTATTGGGACTTAAAT…
ERR026357_ST1_1010_1	ATGTTAAAAGTATTAAAAGGAAATATAATTTTTACAAAAACTTCAGAAACTTTCACAGTATTTGAAAATAGTTATATTATACTGGAAAAAGGTAAAGTAAAGGGAATATTTAAAGAGATACCTAAGGAATACAAAAACCTAAAAGTAGTAGATTACACTGATAAGCTTATAATACCTGGTATGAATGACCTCCATGCCCATGCCTCTCAATTTAAAAATCTTGGAATGGCTATGGATAAAGAGCTTTTGCCATGGCTTGAAACTTATACATTTCCAGAAGAGTCAAATTATAAAGATATAGAATATGCAACAAAAATGTATAAAAAATTTGTAAAAGAACTTTGGAAATCTGGAACTACAAGAATAGCAGTGTTTGCAACAGTACATAAAGAAGCCTCT…
ERR026357_ST1_753_25	ATGAAAATACTAGTATTTGGAGCACGCGATTATGAAGAACCAGTAATAAAAAAATGGTCTGAAGAACATAAGGATGTTCAAGTGGATATTTATCCTGAAAACATGACTGAAGAAAATGTAGTTAAAGCTAAAGGGTATGATGGTATATCTATACAACAAACTAACTATATAGATAATCCTTATATTTATGAAACTTTAAAAGATGCTGGGGTTAAAGTTATAGCTTCAAGAACTGCAGGGGTTGACATGATACATTTTGATTTAGTTAATGAAAATGGACTTATCGTTACAAACGTTCCTTCTTATTCACCTAATGCAATAGCTGAATTAGCTGTTACTCAAGCTATGAACCTTTTAAGAAAGACTCCTCTAGTAAAGAAAAAAGTCTGTGAAGGTGAT…
ERR026357_ST1_915_2	ATGAATTTAGCAAAGGGATTAGATGTTTTAAAAATTTCATCAAATGTATTCGGTGAAGATAAAGTTATGTATATTCCTGTAATCTACACAGAAGATGATGCAACACTTATTGACACAGGTCTTCCGGGTCAAGGTGATTTAATAATTGATGCTCTTAATAAAAGTAACACGAGCTTTGATAGGTTAAAAAATATAATAATTACTCATCATGATATAGACCATATAGGAAACATAAATTATCTAAGAGAAAAATCTAAGAATAATATCAAAGTATATGCATACAAAAGTGAAGTCAGTTATATAACAGGAGAAGAAACTCCTTTTAAACTTTATATGTTGGAACAAATGGTAGATAAAATTGATGATAAGATGCTTAGTATGCTAAATGTTATGGGACTT…
ERR026357_ST1_802_5	ATGTTAACATATAAAGAATCAGGTGTAGATATAGATGAAGGAAATAGAGCAGTAGACCTTATAAAAGGTAAAATAAAAGGAACTTATGATGGAAATGTAGTTGGAGATTTAGGTAACTTCAGTGGATTATACAGTTTAAAAGATTTTGTAGGTATGAAAGAACCAGTTTTGCTTGCATCTACAGATGGTGTTGGGACTAAGTTAAAAATAGCTCAGATGATGGACAAGCATGATACTGTTGGAATAGATTTAGTTGCAATGTGCGTGAATGATTTAATTTGTCAAGGAGCAAAACCATTATTTTTCCTTGACTATATAGCTCTTGGGAAATTAGTGCCTGAGCATATCGAAAAAATAGTTGGTGGAATTGCAGATGGTTGTAAAATGTCTGGTTGTGCA…
ERR026357_ST1_766_7	ATGGGAGGAGCAAGGGATTATTTAAATGGAGGTAAAATGAAAGATTTTGAGAAACTATATGAAGCTACAACTAAGTTAGTAAGTACTTCGTTAAAAGTAAAAGATGATTTAAAAAAGATGTTTAAACAAAATGGATATGATATAACAACTGACCATTATGCGTTATTAAGGTTTCTATGGGAGCAAGATGGAATTTCTCAGATAGATTTATGTGAAAAATCATGTAAGGATAAATCTAATACAACAAGAATTTTAGACGTTATGAAAAATAAGGGATTAATTGTCCGTAAAGTAGATGTTAAAGATAGACGTAAGTTTCAAATATTCCTAACAGATTTAGGTAGAGAATTAGAAGAACCATTAAATGAAATTGCAAGTATATATGCAACAGAGACATTT…
ERR026386_ST1_568_1	ATGAATAATGGAATAGTGAAATGGTTTAATAATGAAAAAGGATTCGGTTTTATATCAATGGAAAGTGGAGATGACGTGTTTGCTCATTTCTCAGCTATACAAACTTCAGGATTTAAATCATTAGAAGAAGGTCAAAAAGTAAGCTTTGATATAGTTAAAGGTGCTAGAGGTCCTCAAGCAGAAAATATAACTATATTATAA
ERR026852_ST1_135_65	ATGAAAGAGCCAATTTATAAAGTTATAGAAAATCATGTTAGAGAGTTAATAAATTCAGACAGTTTGAAAGAAGGGGATTTAATCCCTTCTGAAAAACAGCTGAGTGAAGAATTTAATGTAACTAGAATGACTGTAAGGTCTGCACTTAATAATCTAGTTAAAGAAGGCTATATGACTAGACAAAGAGGTGTAGGTAGTATAGTTATTGCAAATAATATATATGATAATATATCGTCTGTAAGTGGATTTACTAAAGAGATGGAAAGTAAAGGCTATAAAGTATCTAATATATTGGTATCTCTTGAAATAGTTCAGGCAGATGAAAATTTATCAAGTAAGTTGAATATAAGTTTAGAAGAAAATGTTTGGGAAATAAAAAGAGTAAGATTAGCCAATGAT…
ERR029484_ST1_195_13	ATGAAAGAAAAAATTTATTACAATGGAAATATCATCACAATGGAAGATTCAATATGTGGAGATGCTATTCTTATAAAAGATAAAATAATAAAAAAGATAGGAACAAAAGAAGAAGTATTTGCTTTGAAAAATAAAGATACAGAAATTATAGATTTACAAGGTAAGACATTGATGCCATCTTTTATAGATTCACATAGTCACTTGATAGCTTTTGCTACTACTCTAAAGCTAGTTCCTTTAGAAGATGCAACCAGTTTTAAAGACATAGTAAAAAAAATACAGGATTTCAAAGAGTCGAATAATATAAAAAAAGGAGACTGGATAATTGGATTTTCATATGATAATAATTTTTTAGAAGAAAATAAGCATCCAGATAAGAGTTTACTCGATAGTGCATCT…
NODE_9_length_141744_cov_44.3687_95	ATGTCTTTAAATTCGATAGATAGAAAAAAAGAAATACTTAAATTATTAGATTCAAAAGGGAAGGTAAATACTAAAGAATTAGTAAAAAGATTAGAAGTATCATCAGAAACAATAAGAAGATATTTGGAAGAATTAGAAAATGAAAATAAATTAAAAAAGGTATATGGTGGTGCTATAAAAATAAATTATGGAGTGATTGAACCAGAACATATAAAGAGAAACAATACTAACCTAGATAAAAAACAAAGTATTGCTAAATACGCAGCTAAGTTTGTAAATGACAATGAGTCAATTATCATAGATGAAGGTACTACCAATTTGCAGATTGTAGATTATATAATATCTGTAAACAATTTAAAAATTATTACAAACTCTTATCCAGTTCTATCAAAATTGATT…
ERR026852_ST1_129_150	ATGGCAAGTGAAGTGTTACAAAAAACAAGGAAAATAAATAAAACATTACAAACAAGTGGTGGAAGCAGTGTCTCTTTTGATTTACTGGCCGGAGCATTGGGCGACGTTTTAAGTTCTAATGTTTATGTAGTAAGTGCAAAAGGTAAAGTACTAGGTCTTCATTTAAATGATGTTCAAGACAGTTCAGTTATAGAAGATGAGTATACTAAGCAAAAGAAATTTTCAGATGAATATACTCAAAATGTGTTAAAAATTGATGAAACATTAGAAAATTTAAATGGTGAGAAGATATTAGAAATCTTTCCTGAAGAACATGGAAGATTACAAAAATATACTACAGTAGTTCCAATATTAGGAAGCGGTCAAAGATTAGGAACATTGGTACTTTCAAGATATTCA…
ERR026357_ST1_736_50	ATGTTAAGTGATGCAAAAAATAATAGGTATGGTTTGTCCATAATTGCTGTCATAAGTATCTTAGTAATTACAATTTCCTGTTTGATTTATGGTTCAAGGTTGAATAAGACATTAGGTGAAGAAACGAATCAATATCTTTCAGAAATAGCAAATCAAAGCGTCAATGTGTTAAAAAAACAAATTAATGGAGATATAAAGTTACTAGAGTCAATTTCAATATTTATTGAGGGAGAAGAGTCTTTTGAAGTAGATAATATCCTTTCTATACTAAAAAGACAAGCTATTAATAGTTCATTTAAAAGAATGGGAGTTATTTTACCAAATGGTACAGCATACACTACAGATGGTTATATAGAAGACTTCTCTAAAAGAGATTATTTCTTAAAATCAATGCAAGGA…
ERR026357_ST1_765_8	ATGCTTGATATAAAAAGAATAAGAGAAAATTTAGATTGTATAAAAAAAGCAATGGAAAGAAGGGGCGAAAAAGACTTTAACCTTGATGAAGTAGTTAAGTTAGATGATGAAAGAAGAAAGATTCTTCAAGAAGTTGAAGTTATGAAAAATGAATTAAATACAGCATCTAAAAATATACCAAATCTTATAAAAGAAGGTAAAGATGTAGAAAATGAAAAGATTAAACTAAAAGAGTTATCTGATAAAATTAAGGTAATAGACCAAAATCTTAAAGAAGTAGAAGATAAGATGGAATACCTATTAATGAGAATACCAAATGTACCACATCCAGAAGTACCACAAGGTGAAACTGATGAAGATAATGTTGAGGTAAGAACTTGGGGAAAGACTACTACCTTT…
HS-FS-000016-I-01_71_131	ATGAATAATACAATAGAGAGATTAGTATCCTTAATCTATAAAAGAGGTGTTGACGCTCTTTTGATTAAAGCAAAAAATACTAAAAGATATATAGGAGCTTTATCAGGTAGTGGTGTATATGTGCTTGTTACTAAGGATAAAAATTATCAAATTCTAGATGGCAGATATATTGATGAAGCAGATAAAAAAACGACTGGTTTCATAAAAAGGATTGTATCTCAAGGTTCTTATATACCAACTATAATTGAGTTATTAAAAGAATTAAATATAAAAAAGTTAGCAATAGAAAACCAAGCTATGAGTATACAAGAGTATCTTTCACTAAAAAATGAAGGTTTTGAAATCAATTTAATAACAAATGAATTATGGAAGCTAAGGGCTATAAAATCTAAAGAAGAA…
HS-FS-000016-I-01_79_44	ATGAGTAAGAAATTATTTATTCCTGGTCCTATTGATGTTAAAGAAGAAGTCTTGCAAAAGATGGCTACACCAATGATAGGACATAGAGGAAAAGATGCATCTATGCTCCAAAAGAGTATAAGTGAAAAGATGCAAAAACTATTCTATACAAACAACACGATACTTTTATCCACGTCATCCGGAACTGGTTTAATGGAAGGCTCCATTCGTTCCTGTACATCCAAAAAGGCAGCAGTATTTTCCTGTGGATCCTTTGGTGATAGATGGTACAAAATGGCAGTGGCTAATAATGTCCCAGCGGATATATTTAAAGTTGAATTAGGAGAGGCAACAACGCCAGAAATGGTTGATAAGGTGCTTTCTACCGGAGAATACGATTTAATAACTGTAACTCACAAT…
HS-FS-000016-I-01_63_366	ATGAAAATAGCAATATTTTTAGGAGCAGGAGCTTCAGCAGCAGAGAATCTACCTATTCAAAATGAACTTTTTAGCGAATATTTTAAAAAACTAAATCCCACAAATTATAATACCAAAATGAATAGAGAATTGTATATTTTCTTTAAACAGATGTTCAATATTGATATAGTAAAAGATAATATAGATAATGCAAATTTTCCTACCTTTGAAGAAGTTTTAGGTCTTTTAGACTTAGCAGAACAAAGAAAAGAAGCATTTAGAAATTTTGGACTAGAAAATCTAAATAACAGAAGTGATAGTATACGTTTTTTAAGACAATATTTAATACTGCTAATGGCTGAAGCAATTCATAATACACCTAGAACAGATAATAAATATCATAAACTTTTAGTTGAAAAT…
HS-FS-000016-I-01_67_110	ATGAGTATTAAGAAAAAAGTTGCCATAGTTTTTACTGGTGGAACTATATCTATGACAGTAGATGATAAAGTCGGAGCAGCTATACCAACTTTATCAGGTGAACAAATACTATCAATGGTTACCAACATTGATAAAGTTGCAGATGTTGAAGTTTTTAATTTTGATGAAATTCCAGGACCTCACATAACACCTTATAGAATGATGGAATTGAAAAATTATGTAAATGATTTATTAGCAAGAAAAGATATTACAGGTGTTGTAATAACACATGGTACAGATAGTTTAGAGGAAACAGCTTATTTTCTAGACCTTACAATTGACAACATCAAACCTGTAATAGTCACAGGTGCTATGAGAAGTAGTTCTGAACTTGGATATGATGGTTCAAGTAATTTATCT…
HS-FS-000016-I-01_63_513	ATGGGCGTTGGTATATCTAGGTCATCACTAGCTGGTGCAGTTGCTAAGCTTGGTGGTGTTGGTGTAATTTCTGGAGTTCAAATTGGATATGATGAGGAAGATTTTGAAACTAATACTATAAATGCAAATTTAAGAGCTATAAAAAAACATATTTCTAAGGCCAAAGAAATCTCAAATGGTGGTATTATTGGTATTAATTTTATGGTAGCTATGAAAGAATATGAAACATACGTAAAGGAAGCTGTTAAAGCTGGTGTAGACCTTATAATATCTGGAGCTGGATTACCTAATAAGCTACCATCATTAGTAAAGGGAAGTAATGTAAAAATAGCACCCATAGTTTCAACTGCAAAAGCTGCTAATGTAATTTTAAAAATGTGGGATAGAAAAGAGAAAACT…
ERR024660_ST1_85_272	ATGAAAAAATGTTTAGATAATTACAGTTGCCCAATAGAAGCAACACTTGCATTGATTGGTGGTAAATATAAGACACTTATACTTTGGCATCTTAAAGACACTATATTGAGGTTTAATGAATTAAAAAAATTAATTCCTAAAGCAACGCCTAAGATGTTAACTCAACAATTACGTGAATTAGAATCAGATGGTTTAATTATAAGAGTGGTTTATCCTGTTGTTCCTCCAAAAGTAGAATACTCGCTATCTGATTTTGGAAAGAGTAGTATTCCAATTTTAGATTCCATGTGTGACTGGGGTTCTGATTACTTAGAAAGTCTATAG
NODE_2_length_289434_cov_109.739_212	GTGAAAAAAGATAGCCTAAAAAAATACATTATGATAGGAGCATTTGCTCTAATACTTTTTGGAATTGCTAGTATAAATTTTAAATCATTAGATAAAACAAAAACTCAAATTTCTAGTCCAACACTCGACACACATGAATATGATTGGTATTTTAACCCTAGGGAGGATGGTAAACAGCCATCACCTATAAAAGAAGCTGATTTTTTTAAAAAATACGGAGCTTATTATGTAGGAAATCCCAATGAAAAAGTTATATATCTATCATTTGATGCTGGATATGAAAGTGGAAACACTCCAAAATTATTAGATACGCTTAAAAAACACAATGCTAAAGCTCAATTTTTCGTAGTTGAAAGTTATATAAAAAGCAATCCAGAGTTAATAAAGCGTATGGAAAAA…
HS-FS-000016-I-01_63_89	ATGTTATTAATTTATAATGAAAAAACAAACCCTTATTTTAATTTAGCAATGGAAGAATATCTTCTAAAAAATTTTGATGAAGACTTATTTATTTTATGGAGGAATGAACCTTCTATAATTGTTGGAAAAAACCAAAACACACTTTCTGAAATAAATTTAGAATATATAAAAGAATATTCTATACCTGTCGTTAGGAGACAGTCTGGTGGTGGAGCTGTATTTCATGATTTGGGAAATATAAATTTTACATTTATAGCTTGTAACAATAATAATTTTAGTGATTTCAGAAGATTCACTCAGCCCATAATAGATTTACTTAAAACACTAGATGTCAATGCCGAATTTTCTGGAAGAAATGACCTTCTTATAGATGGCAAGAAATTTTCTGGAAATGCTCAA…
HS-FS-000016-I-01_63_182	ATGTTTGAAAATTTACCTAAGATAGATTTACATTGCCACTTAGATGGAAGTGTTAGAGTAGAAACCATGCTTGATATAGCTATTAAAGAGAAAATAGATTTACCTTCAAATAATATGGATGAAATAAAAAAATTAGCAAAGGTTTCTTTTAATTGTACTTCACTAGATGAATATTTAGAAAAATTTGATTTACCCTTAAAAGTAATGCAATCTAAGGAAAATTTAAAAAGAATTACTTTTGAACTTTTGGAAGATGCAAGTAGAGAAAATGTAAAATATATTGAAATTAGATTTGCACCATTACTTCACACCCAAAAAGGTATGAGTGTTAAAAATATAATTGAGGGTATAATTGAAGGAATTAGAGAAGCTGAAAGTATTTATGATATAAAAGGCAAT…
HS-FS-000016-I-01_77_90	ATGAAAGCAGTAGTTAAAACTAAACCAGGCTATGATAATGTAGAAGTTTTAGAAGTAGAAGAACCAAAAGCTACAGGAGACAAGGTTAAAATAAAAGTAGAATATAGTGGTATATGTGGTTCAGATATACATTCATTTAAAGGTGAATATGCAAATATAAAAGCCCCAGTAACATTAGGTCATGAATTTTCTGGAATTGTTGTAGAAGTAGGAGAAGATGTTAAAGATATAAAAGTAGGAGATAGAGTTACATCAGAAACTACTTTTGCAACTTGTGAGAAATGTATATATTGTGAAACTAAAGATTATAACTTATGCCCAACTAGAAAAGGTATTGGTACTCAAGTAAATGGAAGTTTTGCTGAGTATGTACTATCAAGAGAAGAAAGCATACATGTA…
HS-FS-000016-I-01_72_13	ATGAAGTTATTTTTAAAAGATTATAAAGGTTATATTTTTATATATTATATAGGCATAGTTATGACAATTATTTACTGTAATCTTATGAAGTTTATTAGTTTTGGAGAGAGTTTATATATTCTTTTATTTAGTTCTTTTATATTGTTATGTTTTTTAATATATAAGTATTATAAAAATAGAGAAGTATATAATCTGTTTGAAAAAGGAATACATTCTTTGGAGGAGTCATTTTTGTATTTAGGAAGCTCATTCTTGGGGAGAAATATATCAGTTATTTTAAAACAACAACATAAATTGTATCAATCAATGATACAAGAGCATAAAAAGATACATAGTGAACATTTAACTTTCATCAACCAATGGATTCATCAGATGAAAACACCAATATCAGTTATAAGC…
HS-FS-000016-I-01_74_25	ATGAGCACAATAATACCAAAGGATTATAAAAGTAGTTTGAACGTAATTGATACACAAATAGCTATAAAAAAATTAAAAGATTTTTTTGAAATGAGACTAAGTAATGAATTAAATCTTATAAGAGTTTCTTCTCCGTTATTTGTATTGCCAGAAACAGGTGCAAATGATAATTTAAATGGAGAAAAGGCTGTAAGCTTTGATATACCATTTATGAATAAAAATGCAGAAATTGTTCAATCACTTGCAAAATGGAAAAGATTAGCCCTTAAAAAATATGGGTTTGAAGTTGGTAGTGGTTTATATACAGATATGAATGCAATAAGAAAAAATGAAGAATTAGACAATATACATTCTCTTTATGTAGACCAATGGGATTGGGAATTGGTTATAGATAAAAGT…
HS-FS-000016-I-01_74_58	ATGAAATTAGGTATAGTTGGTTTGCCAAATGTAGGTAAAAGCACACTATTTAACGCAATAACTCAAGCAGGTGCAGAATCTGCAAATTACCCTTTTTGTACAATAGACCCAAATGTGGGAGTTGTATCTGTTCCAGATGAAAGATTAAACAAACTACAAGAATTATATAATTCTGAAAAAATAGTTCCTACTGCTATAGAATTTTGTGATATAGCAGGTTTAGTTAGAGGTGCTTCTAAAGGAGAAGGTTTAGGAAATAAATTCTTATCACATATAAGAGAAGTTGATGCAATAGTTCATGTTGTTAGATGTTTTGAGGATGAAAATGTTGTACATGTAGATGGCTCTGTAGACCCACTTCGCGATATAGAAACTATAAACTTAGAATTAATTTTCTCA…
ERR024642_ST1_125_57	TTGAAGGAGCCAGAAGACTTTAGTGCTAAGACTGAAAAAGATGTGTTGAAATATGCACTGGGCGCTTTTTTATACGTTCCAGCTACTCAATATAATATGATTTATAAGAGTATTATAGGGGATGTTAAGGGAGTTAGACCATTAGCTATTTGTTTAGAAGATGCTGTTGGAGTAAATGGAGAGTTAGAGGCTATAGAAAATCTTAGATTAATTTTAAAAAATATTAGCAATGAAAGTATAACTAATAAAGATGGAATACCACTAATTTTTGTAAGAATAAAAGATGTGGAGCAACTGTTGAGAATTAAAGAGATTATAATTAAAAATAGTCATTCTATAACAGGAATATTAATTCCTAAAGCAAATTCGGAGTTGATTGAAAATTGTATAGAAGCTTTA…
ERR024642_ST1_120_120	ATGAGGGACTTTTTAAAAAATTATAAGTCATCAATTATACTTTTAGCATGTACTATAATAGGGGTGATAGTAGGATTAGTACTTGGTCCAAAAGCTTCAATACTAAAACCATTTGGAGATTTATTCATAAATGCTCTATTAATGATAGTAGTACCATTAGTTTTTCTTAGTGTTTCTTCAGGTGTTGCTAGTATAAAAAATATGGAACGTTTTGGAAAAATAATGAAGAGTACAGCTATAGTATTTATGGGAACAACACTTGTAATTGCATTTTTAGGTATTACATCTGCATTATTATTTAATCCGTCTAAAGGATTAGATGTATCAAGTGTAAAAAGTTTAATGGTGGCTCAAGATGCAGAAACTTTAGAATCAAAAGGAACGTTATTAGACCAAGTA…
HS-FS-000016-I-01_63_239	TTGAAAAAAGATAGAATAACTTTTTCAGAAATTTTAATATTAATTGTAGGCTGTATATTAATGGCCATTTCTCTTAATTTATTTTTTAATCCACATGCAATCGCTGCTGGTGGTATAACAGGACTTGGAGTTGTTTTAAATTCATTATTCGGTGTAGAACTTTGGATTGTCAATTTACTTTTAAATGTTCCATTATTCATATTTGCTTACAAAATACTTTCAAAAAAAGATTGTTTTAAAACGGTTTTAGGAATAATTTTTCTTACCATAGCACTTAAGCTTACTGCAAATATGGCTACATTAGATATAACAAATGATATGTATCTTGCAATTATATCTGGTTCTATTTTAATGGGAGTTGGTCAAGGACTTATTTTTAGAATAAATGGCTCTACAGGT…
HS-FS-000016-I-01_75_15	ATGAAGTGGAGAGATTATGCTGATGATGTAAATTTATTTGAGGATTTTGATAAAACTATCAAGCCTCTAACTGACGAACAAAGAAGAAAAAATATAAACACTTTAATTGCATATTTTTCAAAAGAAGTTCCTTCTAAAATATACAATTTATCAAATGATGAAATTAAGCCTAGAGATATACTTAGAGGACTTTTGAATGTATATCCACCAAAAGAAATTGCTCCAGAGATACTTAATATGTTACATAATTTATTGTTGATTGAATGTGAAGAAAGAGAGTTAGTAGATGTAAATGATATAGAAGAAGTAGAGGAAGGGATTGCCATATGGAGAGGTAATATAACGAATTTAAGAGCAGATGCAATAGTAAATGCTGCAAATAACAAGTTATTAGGGTGT…
HS-FS-000016-I-01_67_3	GTGAAAAACCTAATTATATATGCAGTATCAGATTCAGTAGGGGAGACTGCACAACAAGTTGCAAAGGCATGTATGTCTCAGTTTTATGTGAATGAAACTTATGAAATAAAAAGATTTCCATACATGATTAATAAAGGAGTACTACTTGAAACTTTGGAGAATGCAAAAGCTGAAAACGCTTTAATTGTATATACATTAGTTGATGAAGAATTATGCAGTATTGTTGAAAGATATTGCGAAAGAGAAGGTCTTAGTTGTATAGATTTAATGACAGATATACTAAGAGAAATAAGCAAGAGAACAGGAAGAAAACCTAAAAGAGAAGCTGGTATAATTAGAAAATTAGATGAATCTTACTTTAAGAGAGTTGAAGCTATAGAATTTGCAGTGAAATATGAT…
HS-FS-000016-I-01_75_102	ATGAAAGAAAAAGCAGGGATTAGAAATGCCATAATAGCAGCCTTTATAATCACAATATTGGCAGAATTAATTGGACCTATTTCATTTAAAGTTATGGGAATAAATGTAACTTTACTTAGTATACTATGGGCTATATTCATAGGAATGGCTGTTTCTCCTCATTTATTAGGGAGAGTTATACCAGCCTTAAAAAAGTTTATAGGGGATAATGAAATAAATGTATCTCCATATTTATTATCTTTGACACTATATCCATTAGGAATAATGTTTGGAATTAATGCAGGGCCTAAAGTTGGTATATTACTTCAAGCAGGACCAGCACTTTTATTACAAGAATTTGGTCATATGGGTACAATGTTGATAGCATTACCTGTTGGAGTAGCATTAGGTCTTGGAAGA…
HS-FS-000016-I-01_79_27	TTGATAAACATAGGTGATTTTAATAAACTTACAGTAAAAAGAAAAACTGAATTTGGATATTTTTTGGATGGACAAACTAATAACACAAAAGACGATATACTTCTTCATAATAGATTAATCGGAAAAAATGAAATAAACATAGGTGATGAAGTAAATGCTTTCATATTTAAAGATTCTGATGACAGAACTGCTGCAACTTTAATACCGCCTTTAGCTAAGGTTGGGGATGTAGCACATTTAAAAGTAGTTGATAATACGGACATTGGTACTTTTATAGATATGGGACTTCCTAAAGACATACTAGTTCCTTTTAAAGCTAAGACTTATCCACTATTTAGAGACGAAAAATATTTATTTTATATATATTTAGACAAAAGCAAAAGAATTGCTGCTACTACA…
HS-FS-000016-I-01_82_17	ATGGGTTTTGAATTTAAAATAATGAGAAGTTTAATATATGTAGGACTTGCCAAGGAAGAATATAGACCTAAGTTAATGGACTGGTTATATCGTCACCATATTCCAGATAGTATTAGCACTTTTGGACCATATTGTACTAAATATGCCTTTTATCAAGCATATCCTACACCAAATGAAGGTGAGCGTTTTGGTGCACGTAAGATGCAACTAACAGAACATTATTGGCTTGTAGATGAACATATGCCTGAGATGGCAAATAGAATTATGACAGAATATATGCCTATGGATGTTCTACGTTGGCAAGGGTGTATACCAGATGTAGAAAATAAAAGGGTTCATGAAAATGCAGAAAGTGGAGATGCAGGACGTGCAGTAGGTGGAGATAATGGATGCCCACCA…
HS-FS-000016-I-01_75_34	ATGATTATTATGAATAAAAAAATAGAATTAATAGGGAATTTTGCAAGTGATTGGATTAGGTATAGTGATTATGAATATAAAATTACTGAAGAAGATGAATTATATATAGTTCCAACAGAAGATGCTGTGTTTACCATGTATAACCCATTTGATGTAGCAGATGATATAATAGTAGATATAATTCGCATAGGACAAGAGGCATTACAAGATATATCAAAAGAGACAAAAGAAATGAAACTAAAGAAAGAAGTACTTGAATTTGTAAAAAAGTATGGATTATTGGGTTTAATATATTCAAGTGTATATAATAGAGATATAGTTGGAGAAGAAAGAGTACTGATGATTGAAAAGAATTATATTACAAAAGAGAATATATTGAGTACAGATGAATATGTAAAC…
HS-FS-000016-I-01_75_26	ATGAAGCCACAATATAGTGATTTTGAAATTGTAGGAGAAAATTATATTTTAGTAGCAGAAGATGAACATATAGAAACAAAGAAAACCTTATCTAAAAAAATTAAAGAATTACCATATATATCAATTATTATTTTATCAATCATAGTCATTGGAAGTGTATTCTCATCTTTTATAATGACACATGAACCAACATACATGGATTTAGCAAGTTCTAATTTAGCTCCAAATAAAACTTTTTTATTTGGAACAGACTCAATGGGTAGAGATATATATTCTATGATATGGTATGGAGGAAAAATATCTTTATTTATAGGACTATTTTCCACTGTAATATCAACTGTTATAGGAATTGTTTATGGTAGTATAAGTGGTTCAGCATCTGAACTCGTAGATGATGCA…
HS-FS-000016-I-01_72_24	ATGTATAAAGACTATTATATTATAAGTAATGGAAATATAAAAAGGAAAGAAAATACGATTTACTATTACAATTTAGAAGGTGAGAAAAAAATATTACCAGTAGAACAAGTTGATGATATTCATATATATGGAGAAGTAGATTTAAACACAAAACTTATAAATTACATAAGTAAATATGGGGTGATGCTTCATTTCTACAATTACTATGGATATTATTCAGGTACATATTATCCAAGGAAGAAAAATGTATCAGGATTCAGTTTAGTATGTCAATCAGCCTGCTATTTAGATAAAAATGAAAGATTATACTTAGCAAAATCCTTTGTGGAAAGTGCATCATACCATATTTTAAGAAATATGAGATATTACAAAGTTGATGAAAGTTTAATTGATACTATA…
HS-FS-000016-I-01_63_330	TTGATTGAAAATAATAGTGAAAAAATAAAAGTCTTAGAAAATGATATTAAACAATTAATAACTATTTCTAAGGCAAATAATATAGATTTAAGTGATAAAATAAATTCACTTAATGAGAAATTGGAAAAGCTTAAGGAAGATGCTTTTTCACATCTATCAGCATATGAAAAGGTAACACTAAGTAGAGATATAAAGAGACCTACGACATTGGAATACATAGAACATATTTGTTCTAATTTTTTAGAACTTCATGGAGATAGGCTTTTTAAAGATGACCCTTCTATGGTTGGAGGGATTGGTCAGATAGGAAAGTTTAATGTTACTATAGTTGGACACCAAAAAGGAAGAGATACAAAAGAAAATATAAAAAGAAATTTTGGAATGCCTCATCCAGAAGGA…
HS-FS-000016-I-01_63_481	ATGGACAAACACAGTGATTCAGTAATGTATGGTGGAATGGAAGTATATAATATTTGGGGAACAACAACAGTAGACTCCATAATTGGAGAGTCTGATGTAATGCGTGCTCTTAAGAATAGAATTTGCAAAATTGGAAATAGTGATTCTACTGTAGCTATAACTGGAGAAAGTGGCACTGGAAAAGAATTAATAGCAAGAGCCATTCATCTCGCAGGAAACAGAGGGAATAAAACATTCGTTGCTATAAACTGTGCTGCTATACCAGAACCTTTACTAGAAAGTGAACTTTTTGGATATACAAAAGGAGCTTTTAGTGGAGCAGATTCAAAAGGTAAAATTGGTAAGTTTGAATTGGCCAATGGAGGGGTTGTATTTTTAGATGAGATAGGAGATATGCCA…
HS-FS-000016-I-01_65_38	ATGATTAGGTTGACTATTGCAAACATAAAAAGATATATAAAAAATCATGCTCTTTTAGTTAATATGGTTTTGTTTCCTGTTATATTAATGTTTTATCTTAACTTTTTTACTGGCAACTCAGAAAATCAATCAATGTACTTTTCTCCAGTAGCGATTGTATCCAATTCTTCTGGAAAATACGAACATAAGTTAATAGATAGTTCTAAATTAAAAGAAAACTCATTTGGATTAAACGAACAAGACAAGGCTATGGATCTATTAAAAAATAATAAAGTTTCTGCTGTCTTCATTTTAGATAAAAACTTTTCAAGCAATATAGATAACTTAAAACGACCTGAGGTTAAATGTTTTAAAACTGAAAATGGTGGAGGTAGTCTTTGGGCAGAATCACAAATAGAA…
HS-FS-000016-I-01_66_55	ATGGAATTTACAAAGAAAAGCAAATTAAAAAATATGTATGTAAACATGAATGTAGCTAGAATGTTGTCTAAGATAAATGAGTATAAGGGTAGGCAACTGCTTTACAAAAAACAACCAAAAGAAATTTTAGAAAACCTAGAAAAAAAATCTTTAGTAGATTGTTCTGAATCTACATACATTGGAAATCAAAGAGATAGTAGTAATTTTAATCTAGAAAAGTTGATAAGTAATGAAGTTACACCTAGAAGTAGAGAGGAATTGAGTATTGTTGAATACAGAGATGTGGTAAAAACTATTAACAGTGCTTATGAGAGTATTCCCATCAGTTCACAAACGATTCTTGAGCTTCATGGGTACTTATATAAATTTTCATCTACTAGAGGAGGAAGTTATAAGTCA…
HS-FS-000016-I-01_81_57	TTGAAAATTAAATCTAAAAAAATAATAGCATTTGCACTTTCACTTGGGATTATGTTGCCAAGTTGTGTATATGCAGACACTATTAGTAAAAATCAAAATGCACAGGTAGATATGAACAATTATCTTCAAGGTAGAAAATCTCCAAAGGAGGAAAAACTTATTGGTGAAGATAGATTTGATACAGCGATAAAAATATCTCAAAGTGGTTGGAATAATGGTTCAGAAAGGGTGTTTCTAGTTAACTCAAATTCATTGCCAGATGCATTGGCTTCAACTCCTTTGGCAAGTAAATTGGATGCACCAATACTGCTTACAAATAAAAATAGTATACCATATAATGTAACAGAGGAAATAAAAAGGCTTAATCCAGCAGAAGTTATTTTAATTGGAAGTGAAGGA…
HS-FS-000016-I-01_79_62	ATGAAACATTATAGAAAAATAATTCATATAGATATGGACGCTTTTTATGCATCTATAGAACAAAGAGATAATAAAAAATTAAAAGGAAAACCTGTTATTGTCGGTGGAAATCCACAAAGCCGAGGTGTGGTTGCAACGTGTTCTTATGAAGCTAGAAAATTTGGTATCCATTCAGCTATGCCATCAGCTGTAGCTTACAATAGGTGTCCATATGCAGTTTTTGTAAGACCTAGATTTGATGTTTATAAGAGTGTGTCAGAGCAAATAAGAGATATATTTTATAGATACACGGATTTAGTTGAACCATTATCTTTAGATGAAGCTTACTTAGATGTAACAAAAAATAAAAAAAATATTGATTCATCAATTGAGATAGCAAAGCAAATAAAAAAAGATATA…
HS-FS-000016-I-01_79_8	ATGATTAAGTTTAAAAAAACAATATCCCTTATAGCTGTAGGTATGATGACAGTTACTTTATTTACAGGATGTAATAAAGCAACTGATTCTACAAAAGTTTTAAATGTATATAATGTTGGAGATTATATAGATGAGTCTCTTATAGATAAGTTTGAAAAAGAAACAGGAATAGATGTTCAATATTCAACTTATGATACTAATGAAATGATGTATCAAAAAGTAAAGAGTGGTAGTACACACTATGATTTAGTATTTCCTTCAGACTATATGGTAGAGAAAATGAAAAATGAAGGTCTTTTGGAAAAATTAGATTTTAAGAATATACCTAATATGAAATATTTAGATAAGAGTTTTTTAAATCCTGTATACGACAAAACTAATGAATATAGTGTTGCATAT…
HS-FS-000016-I-01_67_51	ATGTCAGAAGTAATTTTAAAAAATATATCAAAACTTTACTCAAATGGATTTAACGCAGTAAAAAATATAAATATAGACATTAAAGATAAAGAATTTATCGTTTTAGTAGGACCATCTGGTTGTGGTAAATCGACTACACTTAGAATGATTGCTGGTCTTGAAGAAATCTCTGAAGGAGAACTATACATTGGAGATAAACTTGTCAATGATATAGAACCAAAAGATAGAGATATAGCTATGGTTTTTCAAAACTATGCTTTATATCCCCACTTATCTGTTTACGAAAACATGGCATTTGCACTTAAACTTAGAAAATTGCCTAAAGATGAAATAGACAAAAAAGTTAAAGAAGCTGCTAAAATATTAGACTTACTACCTCTTTTAAATAAAAAACCTAAA…
HS-FS-000016-I-01_76_96	ATGCATATTAATATGAAATATTATATAGTCACTATAGGGGCTATATTTATAGCTTTGGGTATAGGCATGTTAGTAGGATTTAATTTAAATAATAATCAACAATTAAGTGAACAACAAGCAAACATAATAAATGATTTGGATGATAAGTTTAATATCTTAAAAGAAAAAAATGATAAACTTGACAGTGACTTAGCAAGTGTAAATAGAGATTATGAAGAGGCAGTTAATTTTATAAATAAAAATGTAGATAAGATTTTAGCTGGTTCGCTGAATGGTAAAAGTATAGGAATAATATCGGCTAATGAAAATGACGATTATACAAAAAATATAGAAGACATAATAAATAAATCTAATGGAAGTATTGCATTTAATATAGTATTAAAAGAAAATATAACAAAT…
HS-FS-000016-I-01_63_347	ATGAATATAAAACTTGAACTTTATAAGGTTTTTAATGCAGTTGTAAATAATAAGAGTTTTTCTCTTGCTGCTAAGGAATTGTTTATGTCACAGCCAGCTGTAAGCCAGTCAATAAAGCAATTAGAAGAACAATTAGATACTTTATTATTTTATAGAAACAATAAGGGAGTAAAATTAACTCCAGAGGGGAAAATTCTAAGTGAACATGTCACTACTGCATTAAAGTTGATATCATCAGGAGAAGATAGAATAAATAAATTTAAAAAATTAGAATACGGTTCTCTGAAAATAGGAGTAGGAGATACAGCTGCACGTTTTTTCTTGTTAAAATATTTAGAAATTTTTCATAAGAAGTATCCACATATACATGTATCTACAATAAATAGAACGAGTAGAGAA…
HS-FS-000016-I-01_76_85	TTGGAATTTAAACAATGTCTAAAAGAAAAAGCAAGTTTTGTAGAAAAAGTACTTAAAGAATATATGCCTAAAGAAGAAGGGTATCAAAAAACTGTTATTGAAGCTATGAACTATAGTTTAAGTGCTGGAGGTAAAAGATTAAGACCAATACTTACATTGGAGGCTTGTAAAATAGTTGGAGGAAATGAAGATGAAGCTATTCCTTTTGCTATTGCAATTGAAATGATACATACATATTCACTAATACATGATGATTTGCCAGCTCTTGACAATGATGATTTAAGAAGAGGAAGACCAACAAATCATAAAGTATATGGAGAAGCTATGGGGATTTTAGCAGGAGATGCTTTGTTAAACTATGCTTTTGAAGTAATGCTTGCAGGCTCAATCAATAAAGAA…
HS-FS-000016-I-01_63_524	ATGAGTTACGAGAGAAGAAAGACGAGAGAAGTAAGTGTAGGAACTGTAAAAATAGGAGGAGAAAATCCTATAAGTATACAATCTATGACAAATACTGATACAAGAGATGCAGATGCTACAATAGCTCAAATAAAGAGACTAGAGGAAGCTGGTTGTGATATAGTTAGAGTTGCTGTTCCTGATATTAAAGCTGCTAAGAATATAGCAAAGATAAAGTCTAGTGTAAATATACCAATTATTGCAGATATACATTTCGATTATAAGCTAGCCCTTGAAGCTATAGAACAAGGTGTGGATGGAATAAGAATAAATCCTGGTAATATTGGAAGTAGAGAGAGAGTTAAGATGGTAGTTGAGAAATGTAAGGAAAGAAATTTAAAAATTAGAATTGGAGTCAAT…
HS-FS-000016-I-01_67_26	ATGAATTTTCAAGAGATGATACTGGCGTTGCAAAAATACTGGTCAAAGCAAGGTTGTATCATGATGCAACCTTATGATATTGAAAAAGGTGCAGGAACTATGAATCCTAATACTTTTTTAAGATCATTAGGACCTGAGCCTTGGCAAGTATGCTATGTAGAGCCTTCAAGAAGACCAGCAGATGGAAGATATGGTGAAAACCCAAACAGACTATATCAACATCATCAATTCCAAGTTATACTAAAACCTTCTCCAGATAATATACAAGAATTATATTTGGAAAGTTTAAAAGAGATTGGAATTGACCCAAGTGAGCATGACATAAGATTTGTTGAAGATAACTGGGAAGCTGCTACAGTTGGTGCTTGGGGACTTGGATGGGAAGTTTGGCTAGATGGT…
HS-FS-000016-I-01_65_118	ATGAACTTGAATAAAACTGAGTTTCTTGAAATTTTAAAGGATTATCTAAAAAAAGATTTTTCTGAGAGCGAAGTTAATGATATATTGAGAGATTATGAAGAGTATTTCGTAGATGGTCTTATAGAGGGAAAGAGTGATATGGAGATAATAGCATCACTTGGTTCACCAAAATCTATAGCCAAAGAACTTATCTTGCAGACTAAAGAAAAAAATATTGAAGAGGAAAAAATAATAAATACAGATGTTTTGAATGATAAGTTTAGTAAATTTAAATCAGATATGAAAAAAGGTTACTCTATCTTAAAAGATGAAGCAAAAGAAAAGTATAGTAAATCAAAAGAAAATATAGATGGAAAAATAATGAATACAGATATATTAAATGGTAAATTTAGTAGGTTT…
ERR339762_ST1_107_55	GTGAGAAGAAGACGAAAAAAAGGTGCAGATGAAAAGCTTTTAAGTTATACAAAATATGTTTTAAGAGACGATATAGACAAATTAAAAGGCAAGTGGAATTTAAAGTTTAGAAATGATAATCCAATACATGTTGAATTTGGGACTGGAAAAGGTAAGTTTATAACAACTTTAGCTAAGCAGAACCCTGACATAAATTATATTGCCATGGAACTTAAGGAAGAAGTTCTTTTAAAAGCTGTTGAAAAAGCAGATGCTTCTAATTTGAATAATATACTATTTTTATGGGGAGATGTAAGCAATATTTTGGATTACTTTGAAGCTAAAGAATTATCGAGAATTTATATAAATTTCTGTGACCCATGGCCTAAAAATAGATGGAGTAAAAGAAGGCTCACTCAT…
ERR125924_ST1_589_1	ATGAGCTATAAAAAAGCAATACATATATTACCAGAAGAATTACTTGAATTAATACAGGAATATGTAGATGGTGAATGTATCTATATTCCTAGAAAATCTAATAATAAAAAAGAATGGGGAAGTAATACACCTACTCGTGAGGAGTTGTCAATTAGAAATATGCAGATTTACGAAGACTATCAAGTTGGATATGATTTGCAATATTTATCGGAAAAGTATTATTTATCTTTGAAAAGTATCCAAAGAATTGTATTACAAGAAAAAAGAAAAGATATCTAA
NODE_26_length_54746_cov_302.479_27	GTGATTTTCAAATTTGAAATTGTAACAAAGATTATTTATATGACGAATGGGGGAATACCTTTGGAAACAGTAGAGTTAAGATTTCAATATACTCAAAGTGAATATATAAAAGCAGAAAGGCAATATTTAATTTCTAGTAAAACTATACATAAATATGATATTGCTTTAGTCGCTGTATTTTTGTTGCTGCCAGTCGTTTATATGCTGTTCTCCTCTTTTAGCGTATTTAGTATTTTAATATTTGGATTGATAATTGTTGTAACTGCATTGGGAAGCTATTTATATATCCTAATGCCTATACTGAAATTCAAACAAACTGCAAAATATCATGAGGAATATACGCTGGTATTTTCTAAGGAAAACATTAAATTTAAAACACAAAGCATTGACTCAGAAGTG…
ERR125992_ST1_99_98	ATGAAAAAGAAAATTTGTGTAGCAATAATTTTTGCTCTATTTATAGTTTTTGTAGAAATGTTTATTGATAGCTCTAGCGAAGGAAGTAAAATTATGACAGCTGAATTAAGTAAATACAGGAAAGGCGTAAATGTATTATCAATAAACAATATTATAGTAGCGAATAAAAAATATAGTTTGCCCAAAGATTATTCTCCTCAGGAAAGCAGTGAAGCGAGAGATGCTTTTTATAAAATGAATAAAGATGCTCAAAAGTCAGGATTAAATTTAAAAGCTTTTAGTACATATAGAAGTTATGAATATCAAGATAGATTATTTAAATCATATGAAAAAGAACATGGAGAAAAAGAAGCAAATAGATTTTCAGCTAAACCTGGAGAGAGTGAGCATCAAACTGGA…
ERR251740_ST1_94_360	ATGAGTTTAGTTAATTTAACTATTAATGGCAAACACGTTTCAGCACCTAGTGGAACTTCTATCTTAGATGCTGCGAAATTAATAAATATAAAAATACACAACCTTTGTCATTTACATATGAACGAAATAGATAAGCTTGACACTTGTGCTTCTTGTCGTATTTGTATGGTTGAGACAGAGAGAGGCTTAGTTCCAGCTTGTGGAACAGTTATAAAGGAAGGTATGAAAGTTCAGACTAATAGTGCTAAAGCATTAAATGCTCGTAGAACTATTGTTGAATTATTGTTATCAGACCATCCACAAGATTGTTTTGTCTGTGAAAAAAATGGAGATTGTGAATTACAGACTATAGCTGCTGATTTAGGAGTAAGAAAAATAAGATATCAAGGTTCCAAATCT…
ERR339527_ST1_226_11	ATGAGCACAAATCATGGAGCTAATTTATATAGTTTATCTAGTAAGTATGGCTTTTCAAAGGAAGAATTTATGGATTTTAGCTCAAATATAAATCCTTTTGGTACATCAAGTTTAGCCAAACAATACATTGTAAACAATATAGATATGGTATCTATGTATCCTGACCCTGATTACATAGACTTAAAAACTTCTATATCCAATTACTGCAAATGTTCTATAGATAATATAGTACTTGGCAGTGGAGCTACAGAACTAATTTCATCATTTATACATACAATTAATCCTAAACAGGCTCTTTTACTCTCTCCAGCCTATTCAGAGTATGAAAAAGAGTTATCTAAAATTAATTGTTCTATAGAAAAATACTTTGCAAAAGAAGAAGATAATTTTCATATAAAT…
ERR339674_ST1_124_166	ATGAAGAAGAAAACCGTTTTAATTACAGGAGGAGCTAGAGGGATTGGTAAAGCTATGTCTAAAGCTTTTGCAAAAGAAGGTTACAATGTATTAGTAAATTTTAATAAGTCAGAAAATGTAGCTAAAGAGTTGTATACTATATTAAATGAAAAAAATTTTTCTGTAAAACTTTTTAAGGCTGATATTTCAAATAGAGAAGATGTAGAGAATATGGTAGATTATTGTATAAAAGAATTTGGAGGATTGGATGTACTTGTAAACAATGCTGGTGTAAGTCAAGATAAGTTGTTTACAGATATAACCGATGAAGATTGGGATAATATGATGAATATTAATTTAAAAGGAAGCTTTTATTGTTCGCAAGTTGCTTTAAAATACATGATATCAGAAAAAAAAGGA…
ERR277253_ST1_166_115	ATGGATAGACCTAATCCTGATATTCTATTAGAAAAAATTAAAAATGAAGAAGAAAAACTAAGTAGAGGTCAATTAAAAATATTCTTTGGTTATGCAGCTGGAGTAGGAAAAACCTACTCTATGTTGGAATCTGCACAAAATTTAAAAAAAGTGGGTGTAGATGTAGTAGTTGGATATATTGAACCACACACTAGACCAGAAACATTGGCTCTACTTGATGGCTTGGAAATTCTTCCTGTAAAGGAGATAGAATATAAATCTATAAAACTAAAAGAATTTGATTTAGATGCTGCTTTAGCAAGAAAACCAGAAGTTATATTAGTAGATGAATTTGCCCATTCTAATGTTGCTGGGTTAAGGCATACAAAAAGATGGCAAGATATAGAAGAATTGCTGTTA…
ERR339699_ST1_162_23	ATGTTAAAGAAAAAAAGCAGTTTGACATTAAAAACTATAAGGGAAATATTACCAGGACTGTTTATATCAGTGTTAGTAGGTTATATTAGTATATTTATTTCTATTTTAATTCCTAAGGTAGGGGCAGCATCAATTTCTATATTTTTAGGTATGTTTGTAGGAAACCTATTTTTAAATCAAAAGGTATTTCAAAAAGGTTATAAATTTTCAGAGACAGATTTGTTATCATATTCAATAGTACTATTAGGGGCAACACTCAGTGTATCTACCTTAATAGACTTAAAAGTTTCAGGAATTTTATTTATAATATTGCAAATGACAATAACAATAATAGCTGCACTTTATATAGGTAAAAAACTAGGATTTGAAGAAAACTTTAGATTTCTAATGGCAAGTGGA…
NODE_14_length_94619_cov_113.487_46	ATGAATATATTAGAAATTGTTTTAAATGGAGTTAAAGATACTATAGTAGCTTCTATAGTTACACTGAATGGAGCATCAGGATGGCTTATGATAAGTTTTATATTGGCAGGGGTACTTCACAATGTTTTAACTCCAAGAAGGTTTCAAAAACAACTTGGAAATAAGAAATTTTCTTCTTTAATTAAAAGTACTATCTCAGGAATGTTTTTACCAATATGTAGTTGTGGAGTAATACCACTTGGAATAAGTATGTATTATTCAGGAGCATATTTAGGACCAGTACTTGCTTTTATGACATCAACTCCAATAATAAATCCAATAGCTGTAGTTCTTTGTCTAGGTCTTTTAGGTCCTAAAGTTACAATCATTTATCTAATAGCTGGTTTTTTAGTACCATTT…
FABJ01000041.1_1	ATGGAATATACAGTTCAAAAATTAAGTAAACTAGCTGGTATAAGTACTAGAACACTTAGATATTATGATGAAATAGGTCTTCTTAAGCCACTTAAAATAAATTCTTCAGGTTATCGTATATATGGTCAAAATGAAGTTAATAAACTTCAACAAATACTTTTTTATAGAGAATTAGGAATTAACTTAGAAAATATAAAAAACATTATAAATTCACCAAACTTCGATAGTTTAAGTGCGTTAAAAGAACACCATAATAAATTACTAGCCAAAAGAAAGCAAATTGATTTACTAATAGAAAATGTAACTAAAACTATAGCTCTGAAGGAGGGAAAATACACTATGACAGATATAGAAAAATTTGAAGGTTTTAAAGAAAAGATGATTGATGAAAATGAAAAA…
CDND01000001.1_3266	ATGAAGAAAAGGTATTTAGTCATAGGAATAATAATTTTGTCTTATTTTTCTTTATTTATAGGAGCTGAAGATATAAATATAATGCATATATTTGCAAAAAATCAGCATAAGCTTATGATATTTATCATGAGTAGGGTACCAAGATTAATAAGTATATTGATTGCTGGTGTAGGAATGAGCATAGCAGGTCTTATAATGCAACAGATAAGTAAGAATAAATTTGTATCACCTACAACAGGTGCTACAATAGATGCAGCTCAATTTGGGATAGTAATATGTATGCTTTTAGTACCAACTGCCTCTATTTTTACAAAGACAATAATAGCATTTGTATTTTCTCTTGTAGGGACTTTTACGTTTATGAAAATAATAGGGAAGTTACAATTTAAAAATATAATC…
ERR025343_ST1_138_5	ATGCGAGAAAGTATAGATTTAGAGAAAGAAAGCTTTTTTAATAGGCTTTTTAAAAAATATAAATTTAGACATTTAACACTATTAATTCTAGATATTTGTAGCGTACTAGTAGCGTTTCGAATGTCTTTAAGCTTGACAGGTAATTTAAATGCATTTACCACTAATGATATAATAATTTCAGTGTGTATATATATAGTACTTCATATAGTATCATTTAGATTGTTTAAGTGCTACAACACATTATGGAGATATGCAGGAGAAGAAGAAATTATATCTATTTTTGTGGCAACTTTAGCTTATTTAATTCCGATTTATATAATAAATAAATTATTAGGGTTTGATTATCCTATAATGTTTTATGTATTAAATACAATATTTATTATAATGTTTACAAGTGGC…
ERR026353_ST1_894_5	TTGAAAAAAAGATTTATAAATAAAAGTATAATCATAGGAAGTGTTGTATTGGGTGTTCTTGTTAGTTTACAACTTAAAATTATTAATATAGAAAATAGAGGGATGACAACTTTTAAAAGAGGAGAGCAACTTACAGAAGAACTTAAATCTTTAAAAACAGAAAAAGAGAATCTACAATCAGAAGTTAATAGTGTGAAGAAAGATATAGAGACTTATAGAGGCAAAAACAATAAAGGAGAACAAGACATACTTAAGTCAGAAATAGAAAAATATGAAACATTAGCTGGATATACAGATGTTGAAGGAACAGGCATAAAAATTGATATAAATTCTACAAAAGACTTAGGAAACTCTGATAAAAATGATAGTATACTATATAATTATGATTTATTATTGTCA…
ERR026353_ST1_814_20	GTGGCATTTATAGAATGTAAATTTAAATCTAAATATACTGGAGGAGAAACTGATATAATTGTAATTTTGCCTGTAGCAAATGGAAAAGAACTTTTTAGTGGTAAAGAGATATATGATTTTGAAGGTAAATTTAAAACATTATACTTATTTCATGGTTTAGAAGATGACCAAAGCTCATGGATTAGATATACTAATGTAGAGCATTATGCTAAAAATAAAAATATAGCCCTAGTAATACCAAGAGTAGAAACTAGTTTTTATACAGATATGGCGTATGGACACCAATATTTTACTTTTGTAAGCGAGGAATTACCTAAATTTGTTAGAGCTATATTTCCTTTATCAGATAAAAGGGAAGATAACTTTGTAGCTGGTATGTCTATGGGGGGATATGGAGCT…
ERR025344_ST1_192_6	ATGCATAAAGCATTATATAGAGCATATAGACCACAAAAATTTGAAGATGTTATTGGTCAAGATCATATTATTAAGACTTTAAAAAATCAAATATATAGTGATAATATAGGACATGCTTATTTGTTTTGTGGAACAAGAGGTACTGGTAAAACATCTACTGCAAAGATTTTTTCAAGAGCAGTAAACTGTTTGAATAAAATAAATGAAGAACCGTGTAATGAGTGTGAGATATGTGAATCTGTATTAAAAGATAATACAATGGATGTTGTAGAAATAGATGCAGCTTCAAATAATAGTGTAGATGATATAAGAGAGCTTAGAGAAAGTGTGAAATATTCTCCAGCCAATGCTAAATATAAAGTATATATAATAGATGAAGTTCATATGTTGTCTCAAGGA…
ERR026357_ST1_726_77	ATGAAAAATATAATTAACATCCTAGATGATTTGACTATAAATAAGATAGCAGCAGGTGAAGTTGTAGAAAGACCTTCTTCTGTAGTAAAAGAACTTATTGAAAACTCCATTGATGCAGGTGCAAATAAAATTTCCATAGATATAATTGATGGAGGAAAAAGTCTAATTAAGATTACAGATAATGGAATAGGAATACCTTCAAGTGAAGTTGAAAAATCATTTTTGAGACATGCTACTAGTAAAATTAAAAAAATTGATGATTTGTATGATTTATACTCTCTTGGTTTTAGAGGAGAAGCATTGGCATCTATTTCAGCTGTATCAAAATTAGAAATGACGACTAAAACTAAAGATGAAATAATAGGAACTAAAATATATGTTGAAGGCGGAAAAATAATA…
ERR026357_ST1_749_20	TTGATAAATTTGATAAATAAAAAACGAAAAGGATTTACACTTGTTGAAATGATTGTAGTAGTAACTATTTTAGGCGTTATATCTAGTATAGCATTAGTTAAGTATAGTAAGGTTCAAGAAAGTGCCAAATTAAATGCAGACTATACGAATGCTGCTAATATAGTAACCGCAGCTAGCATGGCAATTAATGATGATGAAAAGACAATAGACTCTCTAAGTGTAGAAACATTGAAGGAAAAGGGATACCTAAATACTGTTCCAGTTCCTCAGAGTACATCAGGTAAATTCGAACTTGTCATAAATGATAGCGGAACAGATATAAGCGTAAATATAAATTCTAAACAATTTTATCCAAAATAA
ERR026357_ST1_753_22	ATGATAAATTTAGAAGAAAAGTATTTAACACGAAAAGACACATATATGATAAAAATTCTAGAATACAATGGACATATTCGAAACTGGAAAGTTCTCTGTGAAGAACTTGGAATCGATTCTTCATTATGTAGAGATGAGCGTGAACGAGCAATTTTAGTGGAAGCATATAAGACATGGGGATATGATATGGCAAATCACATGCATGGAATGTTTGCCTTTGCATTATGGGATACTGTGGAAAAGAAACTCTTCTGCCTAAGAGACCAGTTTGGAGTAAAACCTTTCTATTATTATGAGACTGAAAATGGGAAGCTTCTCTATGGTTCATCTATTCGTAAGATTATGGAGCAACCAGGATTTGTGAAAGAGTTAAATGAAGACATGTTACAGATTTATATG…
ERR024642_ST1_132_73	ATGAATTTTAAAAAATTTTCTTTTAGTTCTATTTATTTAATAATTGCTGTTGGTATAATTTTTACAGCTATTTTATTTAATATTTCAATTTATCTAATAACTGATGATTTAAAACTAATTGCTCTATTATTAATATATACAATAGTACTTTGTGGATTTATAGCATTAATAATATTTTTACTTCATAAAAAAATAGTTATATTTTGTTCTAAAATATGTCACACTTTAGATAGTATGATGAATAGTGAAGACAATATTGAAATTGAATTAGAAGAAGAAACTATTTTATCACGTATCAATCACAGATTAATTAGAATGTATGAAGTTATTCAAGAAAATCGCAATAGTATTGCTATAGAGAAAGCTGATTTACAAGAACTAGTTTCTGATCTATCTCAT…
ERR025002_ST1_144_78	ATGTTAATCATTAAAGGGATAAGTTATGTTCCTATATGCTTAAAATCCGTGGAAGTACAGTATGCAATAACACTTAGTATTAAAACATCTTTAATATCTACTATAGTATGCCTTTTATTAGCTATTCCAGTAGCATATTTTTTACATATTACTAAATTACCATTTAAAAAACTGATTATACAGATAATAAATCTCCCTATGTCTCTTCCACACTTAGTATCAGGAATTGCTCTTTTACTTTTGTTTGGAAGAATGGGGATTGGAGATTCCATTTATAAGATTTTTAAGCTTGATTTTATATTTACAAAGCAAGGTATAGTTTTAGCACAAGTATTTGTAAATCTTCCACTTACTATTAAAATACTTCACACTTCACTAAATGAAAGTAATGAAAAGATG…
NODE_15_length_112937_cov_40.6274_80	TTGAAAAAAAAGAAGATTACATCTAGGCAAAAAAAGATAATACTAATGATAGTAGAAAATTCAAAGAAAAACATTCCAATAACTATTTCTGAGATTGCAGGGACTTTAGAGCTAAGTTCAAGAACTGTACTTAGAGATATGTCTGGAATTGAAAAATGGTTTGATGAAAATGATTTTAACTTTGTAAAAAAACCAGGAGTGGGATTGATTTTAGAGGAAAATATAGAAAATCAAAACTTTATAATTGAGTTGTTAGAAGAAGAAAAAATAGAAAAAGAATACAGCAAGGAAGAAAGAAATTTAATTATATTATCAAAGCTACTAGTTTCTAAGGAGCCAGTAAAATCCTATTATTTTGCAAAAATATTAAAGGTATCTGAAGGGGTACTGAATAATGAT…
ERR025029_ST1_191_5	ATGGCTAAAATAGATTTAATTGTATTGGGAATAGTAAAGCAACAACCCAAGAGTGCTTATGATATTCAAAAGGCAGTGGAATACAGGAATATATCACGTTGGGTTAAAATAAGTACACCATCAATTTATAAAAAAGTAATTCAATTAGAACAAAAGGGATATATTGAAAGTAAAACTGTGAAGAATGGAAAAATGCCAGAAAAAGCAGTTTATTCATTAACTGAATTAGGTGAGACACATTTTTTAGATTTAATGTTTGATACATCTAGCAAACCAATAAATATTCTTTTAGATTTTAATGCTGTTATAGTAAATTTAAATAGCCTTACACCAGAAAAACAGAAATTATGTCTCAATAATATTGAAGAGAATGTTCAAGAGTTAAAGAAAACTATTGAG…
ERR030338_ST1_1295_4	ATGAATAAGGGAAATTGTATTTTGGGAGAGATATTGATTATGATTATTCAACAAATTTATAATAATAATGTTGTATTAGTTTTAGATGAAAATATAAAAAAAGAATTAATACTAACAGGATGTGGGATTGGGTTTCAAAAAAAGAAAGGTCAAGAAATAGATAAAAGTAAAATTGAAAGAACTTTTGTAATACAAGATGAAAGCTTTTTAGATAAAATTAGCAAACTAGCAAGCCAGGTTGATGAGAAATTTTTTGAGATTAGTACTGAAATAATTGCTTATGCAGAGGAGAATTTGAATACTAAGCTTTATGAATATATTTATGTAGCACTTACTGACCATATTGCATTTGCAATTAAAAGATATCATGAAAATATAACTATAAAGAATGATTTACTA…
ERR031678_ST1_188_15	ATGGACACTTATTCTTTAATCTCTACAAGCATAAATTTTATTCTAATATTAATCAATATTTTCATAGCCTTTTTTCTTTATAAGTTGACTTCCTATTTTATAGACTTTAGGAATCATTGGATTTTCAAAATCATATTGATTTTGGGCTACTCTATTATTAGTCAAATGATAATATGGCTTTCCGACCCCGTAAATATTTTGTTTACACTATTCGGATATTTTATACTACTTATAATATGTAGCAAAAGCAAATTAATTCCTATAATATCAGTTGTCATGATACTTTATCCTATTATAATTGGGCTTAATTTTCTTTTTATAAACAACCCTATATATGAGGAACTTATACACTCAAAAGAATATATTTTAATACTTTCAATAGTCCAGATAATTTCTGCT…
NODE_19_length_74691_cov_69.3282_12	ATGGATAATAAGGAATTAAAAGCATTTTGTAATTTAATAGGATTAAACTGTGTAGGAGTAGCAGGGGTAGATAAGTATGATAATTTAGAAAAGATACTTAAGGACAGACAACAAAAAGGTTATTTAACTGGTATGGAAGAACCAATAATTGAGAACAGAATTAACCCAAGACATATAATGAAGGATGCTAACTCTATAATAGTCTGTGCATTTCCATATCATATAAATAGACAAGAAAAGAATAAAAATTCAAATTTATCAAAATATTGTCATGGAAAGGATTATCACATTGTAGTAAAGGACTTTTTACAACAAATTTGTGATTATATTTCTAAAACAGTAACAGATTTTAAATACAAGTTATTTGTTGATAATGGACCATTAGTTGACAGGTATTTA…
ERR026357_ST1_906_3	GTGACTTTGTTGAATAATAAGATTATTAAAAGTAAAAAAGCATCATATAAAGGAGTGCTAGATTTAACCATAATAGATAAAGTTAGAGTGGGAGAATCAAATGTAAATAAAGAAAATGATTGTAGATTTAGAGATGAGGTAATAAAAGAAGCTATAGAATCTGCTGAGATAAAAAAGAATGAGATATTAGAAGAAGCAAAAATGAATGCACAAAATATAGAAAAACAAGCATATGAAAAAGGGTATAGTCAAGGTCAAAAAAATGGATATGAAGATGGATATAAAGAGTCATATGATGAATATACCCAAAAAGCTAAAGATGAAGCAGATTTTATAAAAAATCAGGCAGACTTAATACTATTACAAGCTAATGAGAAGATGACTGAGTACATAAAAGAA…
NODE_6_length_230616_cov_60.3854_88	ATGGACTTAAGAAAATTACTTGAAGAAGTTAAAAATGAAAATATTGATATAGATTTTGCGTTAGAAAAGTTAAAAGATTTACCTTATGAAGACCTTGGATATGCAAATATAGACCATCATAGAGAATTAAGAAATGGGTATCCGGAAGTTATTTATTGTGAAGGTAAGAGTGATGAGCATATTTTAGGGATTATTGATAAAATGAATCAAAAAAGTTCTAACATATTGGGGACAAGGTGCAGAAAAGAAACTTTTCTGAAAATTAAAGAAATCTATAATCATGCTGAGTACGAAGAGGCGTCTAAAATTCTTAAGATTCAAAATCATGATATAGAGAATATAGGAAAAGGTAAAATTGTGATTGCTACAGGGGGAACTTCTGATATACCAGTAGCAGAC…
ERR030302_ST1_133_82	ATGGATAGTCTATTATACGTAATAGAGAAAGATAAACACACTAATGAAGAATTAAGAGAAATCCTAAAAAGCAATAAAAATATAAGATTTGTTTCCTTAATGGGGGTTGATTTAGGAGGAAATGCAACAGATGAAAAGATTCCTGTAGAATTATTTTTGGAGGATATAGATAAATTTTTGGAATCAGCTATACAGACTGATGGTTCAAGTGTTGAGCTTTATAATATAGCTACATTAAATAATGCGAAAGTAGATTTAATGCCAGATAAAAGCTGTCATTGGTATGTAGATTACAATATGGAATATATAGACGAAGAAGTAGGTCTACCTGTTGGAACATTAAAGATACCTGCATTTTTAATACATGATAATAAAAAAGTATGTTCTAGAGGAGTACTT…
NODE_19_length_76935_cov_47.5754_27	ATGATAATACATAAATTTATAATACATGTTTTGGACAAAAATAGTGATGTTCCAATATTAAATGACTTTGAAGGCAAAGTTAATCAAGAAGTAGATGGTTTTTTCCAGAAAGCTATAAAAAGAATTGCAAAAGATGAGGATTTAAGAAAAGGTGTTTTTAAAGATTATAATGACAATTTAATTAAAAACTGTTGTGAACAAATAATATATGATGAAAGTACTTTTTTGAAAAATTCTAAAGAAATTGCATCTTACTTGTTTGACGTTATGAAAATTAATGCTGCACTAGAATCTTGTGATTTGGCAATTTGCTTATACACTATTAAAGATGAAAAGAGTGTAGCAATACTGAAATTAGATTATAAAAAGTTGTACACTCATTCAATTGAATTTGTGGAT…
HS-FS-000016-I-01_65_105	ATGTATAGTACAAAAATACTAGATGATTATGAGTATGAAACTTTTAATGTTTTTTCTACAAAATTAAATCCAAACACGAAACACGATTATTTATCAAAGGTTATACTGTTTAAAGAATTTTTAAAAGGGAAAGAATTGATTTATGCTACAAAAGAAGATTGTAAAAATTTTGTAGACTATATACAGACTAAATATGCGAAATCAACTTGTGAAAAGATATATAGTTATTTACATAGTTTTTATAACTTCTTAAAAAAAGAAGGATACATAGATATAAATCCATTTAGATATGTAGAAAAACCCACAGTAACAAGAATAAAAACAAAAGATGATGTTCTAAGTATACAAGAAATAAATAAACTTATAGGTATCCTACCAAAATTAAATATAAGAGATAGA…
HS-FS-000016-I-01_80_21	ATGCTACGTCGTAAGCCGATAGATGCAGGACAACTTGACTTACAAGAAAAAGTTGTTGAAGTAAGACGTGTTACTAAGGTTGTAAAAGGTGGTAGAAATTTCAGATTTGCAGCATTAGTAGTTGTTGGAGATGAAAACGGACACGTTGGTATAGGTGCTGGGAAAGCAATGGAAGTACCAGACGCTATAAAAAAAGCAGTTGAAGATGCTAAGAAAAATCTAATAGTAGTGCCAATAGTTGGGACTACAATTCCTCACGAAGTACGCGGACACTTTGGTGCTGGAAATATATTAATAATGCCTGCTGTAGAAGGTACAGGAGTAATAGCTGGGGGACCTGCTAGAGCCGTACTTGAGCTAGCTGGACTAAAAGACGTTAGAGCTAAATCTTTAGGGTCT…
HS-FS-000016-I-01_72_41	ATGGAATTTTTAAACGCGTTAGGAAATGGTCAATTTTTGGCAATATCAGGAGCTGCTATAGCAGCATTATTTGCAGGTATGGGTTCTGCTAAAGGTACTTCAATAGCAGGTCAAGCCGCAGCAGGTGTTGTAACAGAAGACCCTAGTAAATTCGGTCAACTTCTAGTTTTACAACTTCTTCCTGGTACACAAGGTCTGTATGGATTTATCATAGCTTTCCTTATTTTATCAAAAGCAGGGATTATTGGTGGAGATGCAATACCAACATCAGCTCAAGGTTTACAACTTCTTATGGCAGGACTTCCAATTGGTTTAGTTGGTTTAGTATCAGGTATAGCACAAGGTAAAGCAGCAGCAGCAGGAGTTGGAATAGTTGCAAAAAGACCTGAAGAACTTGGT…
HS-FS-000016-I-01_77_15	ATGAAAGAATATGTAGTTGTGGATTTAGAAACTACAGGATTAGATCCATATAAAGGTTGTGAAATAATAGAAATAGGAATAACAGAAATAAAAAATGAACAAATTGTAAAAAACTATTCAAGGTTGATAAAACCTAAGGGGATAATTTCTTCATTTATAACAGAATTGACACATATAAGTAATGAAATGGTAGAAAATGAAGAACCACTAGAATTAGTTTTACCTAGATTTAGAAAATACATAGGTGATAGAACTATAATTGCACACAATGCGAAATTTGATTTAAAATTTTTAAATTACTATCTTAGGATGTTAGATTTAGAACCAATAAACAATTATATATGTACAGTAGAATTATTAAAAAAATGTAAAAGTTATAAAGGAAAAAACAAGAAACTT…
HS-FS-000016-I-01_77_18	ATGATGCCTAATAAACTTATAAAAAATTTACTAAGTGGTATATTACAAATTTTATTTTTTCTTTTAGGGTTAGTAATTGTTGTGGGAGGATTTAAAAGTTTTATGTACCTCTGTTTTAGTGGAGAAGCAACTCTACAAGGCACTATTTCTGGAATATTAATGTTTATTTTAGGTGTATCATATTTTATCATTATAAAATCATTGATAGAAGTATTAAGTAGTTCTGAACATAGCTTATTTGTAAAAGATAATGTAAAAAGATTTAGGATTATTGGATATCTTTTGCTTTTAAACTCTATAATGGAGTTTATTTCAACTTTTGGTACTACTGGAAAAGGAATGAGATTCCTAGATTTAGGATTTGGATTTTATTTTACTGTTCCAGTATTTGTATATTTT…
HS-FS-000016-I-01_82_68	ATGACTGAAATAACTATAGAATCAGAATATATAAAGTTGGATCAATTTCTTAAATTAGCAGAGATTGCATCAACAGGAGGTCATGCAAAATTTTTAATTCAAGAAGGTTTAGTGACAGTAAATGATGAAATAGAATTAAGAAGAGGAAAAAAGATAAAATCAGGAGATATAGTTAAAATAGAAGGAACTAAAATAAAAGTATTGTAA
HS-FS-000016-I-01_65_153	ATGGATGCTCGAAAAAAATGGATACCTTTTTTGGGAGTGCAAGTCAAGCAAAGACTTATTGAATTAAATATGACTCAAAGGGAATTAGCGAAGAAAATAGGTGTTAATGAAAACTATTTGTCAGCTATTTTAAATGGAAGAAGAACAGGTAAAAAATATAAATCATCAATTTATCAATTACTTAATATAGAATATTCAGAAGATGATTAA
HS-FS-000016-I-01_64_251	ATGAATTATGAAATAGTAGAGATAAATGAGAAAATAGTTATAGGAATATCGAAGGAGACTACAAATAAAGATGGACAAGCGGTAAATGCTATAGGTGAATTGTGGAAAAAATTTATGGGCAAAGGGATATATAATGCTATAAAGGGTAAAAAGAATGACAAGACAATAGGTCTATATACAGATTACCAGGGTGATTTTACAAGTCCGTATAGCTTTGTTGCATGTTGTGAAGTAAATAGTAATTCTGATAAAGAGAAGAATTTAGAAGAATTAAACACTAATAATACTGTTGGAGAAAGTATTATTAGTAAAGTTATACTAGCAGGTAAGTATGCAAAGTTTGTTATAGTAGGAGGTCAAAAAGAAGTAGGAGATTTTTGGTTTAAGTTTTGGCAAATG…
HS-FS-000016-I-01_68_208	ATGATAAAAATTGAAAATTTAAATATTATTAACAATAAAGATATGAAAGAAATACTAGATACACGGGAATCATCAGTAAGAGCAACACATGACTTTTTAAGTGAAGAAAATATAATATCAATAAAGCCTCAAGTTAAAGAATGTGCTAAATATGTTAGTAATTTTTTATGTGTAAGAGACAAAAAAAGGTATTATAAAAGCTTTTATGGGAATACATGA
HS-FS-000016-I-01_64_65	ATGAAACTTACAACTATTTGTTATATAGAAAAAGATGACAAGACTTTGATGTTGTACAGAAATAAAAAGAAAGATGATATACATGAAGGTAAGTATGTAGGAGTTGGAGGAAAGTTTGAGCAAGGAGAGACTCCAGAAGAATGTGTAATTAGGGAAGTAAAGGAAGAGACTGGTCTTACTCTTAAATCATTGTCATATAAAGGGTTGATAACTTTTCCAAAATTTAAAGATGAAGAAGATTGGTATATGTTTTTGTATTTCTCAGATGAGTTTGAAGGTGAATTGTCTGAAAAAGATTTAAATGATTGTAAAGAAGGAAATTTAATTTGGGTTGGTAATGATAAAATATTCGATTTAAATATGTGGGAAGGTGACAGGTTGTTCTTAAATTGGGCTAAG…
HS-FS-000016-I-01_64_138	ATGTCTAAACAACAAACTGGTATTAAATCAACACTTATTTCAGAAATATTGGGAATTTCTTATTGTATTGGAGCTACATTAGTAAATAAGTATTTTTTTAAAGGAAGTAGTATTGAATATCTTCCTATAATTATTTGGGTATTAGCTATGGGAGCTCAGTGGGTCTATAATAAAAAGTATGATGATTTAATTGATGAGGCATCAAAATGTATACTATCAAGAGTTAATGATATTGCAATAAAAGTATTGTTTTTTTCTGTAGCTATAGTATCTATATTTCTTGTAACTTTGGACATAAATGTGTCAAATTTAAATATAGGAATGTCTTTATTAGTCATTTTGTTTATTCAATCCTTGTTGAAGTTAATTCTATTTATATATTTTGACAGAAAGGGGATA…
HS-FS-000016-I-01_65_64	ATGGAAAATAAAAATTCAAAATGTGTCATGGTAATAGACGAAAATTTACCAATGGGAATTATATCCAATACAGCAGCTATAATGGGAATTACACTAGGAAAACATGCCCCAGAAACTGTTGGGCCAGATGTAATTGACAAAACAGGTAATAGCCACTTAGGAATTATTGACATTCCTGTACCTATTTTAAAAGGAAACAAAGAAATAATAAAAGATTTACGTAAAAAATTATATACTTTGGAATTTAACGATTTAACTGTTGTAGATTTTTCAGATGTAGCACAAAGTTGCAATCTTTATGAAGAATTTACACAAAAGATTGCTAGTGTTCCAGAAGATGAGTTACAGTATTTTGGGATAGCAATTTATGGGAATAAAAAGAAAGTGAATAAACTTACT…
HS-FS-000016-I-01_65_141	ATGGAAATGTGGCTTAGACAAGCAGAAGATAGATTTAGATTTCCAGTATTTCCATCTTCCTTTAGTATTAATGGAAAAGCTGCTGTAAACTCTTCTAGTATACTCAAAATAGGTGAAGTAGCAACTTTTGGTGGTGTAGCTCTTAAAAGCATTTCAATATCAAGTTTTTTTCCAAATAAAGACTACACTTTCTGTGACTATACAGGTTTTCCATCACCATATGATTGTGTAAATAAGATAGAAAAATGGATGAAGGAAGGTTTTATATTAAGATTTACAATTACGGAAACAAATATAAATATGGAAGTCATAATTGAAGGGTTTAGTTATGAAGAAAGAGATGGGACTCGAGATGTATATTTTACATTAGATTTAAAAGAGTATAAAAGAATAAAGATA…
HS-FS-000016-I-01_72_75	ATGAAAAAAAGGATATTAACTATATTATGTGTTGTACTCGTTTTGTTTATTTCAATTACAGGATTGGATTCGATGGGTTTTTTCTCACGAAGTATCATACCACTAAGGTCTGAATATGCTTCTTTTATTAGAAAAAATGGAACTATTACAGAAGTAAAGTTTACTGGTCCCTTTAATCATAATAACATTGATTTAAATAAAAATGTAGAAGATACTAATAAAAATGGAGATGATAATGAATTAACAATAAAATACGATATTGAAGTAAAAAAATCTCTAATTTCATCTAATGAACCTACTATTCAAATTCAAGACTCTAAAGAAAGCATATATGTATATATCTTGAATTTTTCAGATAAGACAATAATAATTAAAAATGGAAAAATTGTTGACTAA
HS-FS-000016-I-01_65_99	ATGAACTTGCCTAACAAGTTAACTTTGTTTAGAATATTTTTAATACCAGTATTTGTTTTAATTATGTTGCTCAATGTACCAAATAAATTTTTAATAGCTTGTATTATTTTTATAATAGCTTCAATTACTGATGCTTTAGATGGAAAAATAGCTAGAAAATACAATCTAGTCACTGACTTTGGAAAATTTATGGACCCATTAGCAGATAAGTTATTGGTTATTTCAGCACTTACATGTATGATAGAAGACCATCTTGTAAGTAGTTGGATGGTAATTATAATAGTGGCTAGAGAGCTTACAGTTAGCATATTAAGAGCTATAGCTGCTGCTGATGGAAAAGTAATTGCTGCTGGAAACAGTGGAAAACTTAAAACGATAACTCAAATGGTATCTATAGTG…
HS-FS-000016-I-01_73_76	ATGGATTTAAAAAACTTTATAAGGAATATTGATGATTTCCCAAAACCAGGCATAGATTTTAAAGATGTGACAACTCTATTTAAAGATGGAGATGCATTTAAATATGCAGTGGATTCTATAGTTGAAGAATTGAAAGATAAAGATGTAGATTTAGTAATAGGGCCAGAAGCAAGAGGATTTTTGATGGGTACACCTGTAGCATATGCTTTAGGAGTAGGATTTGTTCCAATTAGAAAACCTGGAAAGTTACCAGGTGAAGTTGAGAGTTATGAGTATGGATTAGAGTATGGTACAGATACTTTAGAGATACATAAGGATGCAATTAAAAAGGGTCAAAAAGTAGCAATAGTAGATGATTTATTGGCTACTGGTGGGACTATGGAAGCCGCTGCCAAGCTT…
HS-FS-000016-I-01_63_79	ATGAATATAGATGTCGGAAGCAAAATTAGATCTCTTAGAAAATCTAAAAATATAAGTATCTCTACTTTAGCAAAAAATTCAGATTTAAGTACAGGCTTAATAAGTCAAATTGAGCGTAATATGGTTGTTCCATCTATTGTAGCAATGTGGAAAATATCAAAAGCTCTTGATATAAATATAGGTTATTTTTTTGAAGAGATTGGAAGAGAGGACTCTGATATAGTAGTAAAGAAAAATAATCGAAAAAAAATAGTAACTAATGATTCTACAAAATTTTATGAACTTCTTGTTCCTAATTTATCTGGGAAAAAAATAGAATTTATACTTGTTACGCTAGATGGTCATACACAAAAAAACAGTGAATTTGTGACACACGAAGGAGAAGAATGTGGCTATATA…
HS-FS-000016-I-01_71_39	ATGAAGTTAAAAAAGAATAAAAAAGGTTTCACTTTAGTGGAATTATTGGTAGTAATTGCAATTATAGGTATATTAGCAGTAGTGGCAGTTCCAGCTTTATTTAGTAATATAAACAAGGCTAAGGTAGCAAGTGTTGAGTCTGATTATAGTTCAGTTAAGAGTGCAGCATTATCTTATTATTCAGATACTAATAAGATACCAGTTACACCAGATGGTCAAACTGGTTTAAGTGTTTTAGAGACTTATATGGAGTCTCTGCCTGATAAAGCTGATATAGGTGGAAAATATAAATTGATTAAAGTTGGTAATAAATTGGTATTACAGATAGGTACAAATGATGAAGGAGTTACATTAACAGAAGCACAATCAGCAAAATTATTGAGTGATATAGGTGAAAAT…
HS-FS-000016-I-01_71_45	ATGAGTAAAAAGAATAGTGAAAGAGGATTTTCCTTAATTGAAGTGTTAGTAGCTATGGCTATTATGGGAATTGTACTATTTGCATTTTTTAATATTATCAATACTAATAACAAAGCAAACACTAAAAATGACACAGATATAACTTCCTTAAACTATGTCCAAAGTGAAATAGAAAATCTAAGAGAAAAGATAAAAAGTGGAGAATTTGATTTTGATAGTTTAGATAAACTAGAAGATGGAACTGTCGTATATGAAAAATTAATAGATAAATCAAAAAAAGTTGTATATGATAAAGTTCTTAGTGAAGGTGACGTGAGCTTATATGATACTCCATATGAAAAGATTACAACAATAAAAGATGAAGATGGTAATTTAATCGACAAAGGAAATATTACAAAT…
HS-FS-000016-I-01_63_519	ATGAGTAAGCCTATAGATATAACAATAAGACCTATAAGAAGAGAAGATGCACAAGCTTTTAATGAAATTAGAAGAACATACAGTGTTATGAGAAATACTTTGGCATTAATGAGTGACAGAGTCGATAAAACTGAAGCTATGTTAGCTTCTTTGGGAGAAAATGATTATATGTTTGTAGCTGAAACTAATAATAATGGAGAAAAAGATGTAATAGGTTTTGCTGGGTTACATGTAAATTCTTCTCCACGATTGAGACATAGTGCAGAAATAGGAATAAGTGTTGCAGAGAATTATCAGGGAAGAGGAGTAGGTAAGAAGCTTATGGAACAACTTTTAGATATAGCAGATAATTGGATTATGTTAACTAGAGTAGGATTAGAAGTAATTGTAGATAATGAA…
HS-FS-000016-I-01_63_606	ATGAAAAGTGTAGTAGTGATTTATAAGAGTAAGTATGGTTCAACAAAAAAATATGCTAAATGGCTTTCAGAATTATTGTCTTGTGATATTTTTGAAACTAAGAATATTAATATAGAAAAGGTTATGAAGTATGATACGATTATTTTAGGAGGAGGTCTTTATGCTTGTAATATAGCGGGAATTTCTTTCTTAAAAAAAAATTATAAAGATTTGCAGAAAAAAAATTTAGTAGTATTTGGCGTAGGAGCTGCTCCATATGATGATGAAGTAATAAAGAAATTAAGAGAAGTAAACTTTAAGGATGAATTAAACAAAGTTCCTTGCTTTTATTGTCGTGGGGCATGGGATGAGACAAAAATGTCTTTTATAGATTATACTCTTTGTAGTTTTTTTAAAAAA…
HS-FS-000016-I-01_74_97	ATGAAAGCAATTTTAACAGTAATTGGAAAGGATAAACCAGGTATAGTGGCAGGAATTAGTGATGAATTATACAAGCAAAATATCAACATAGTAGATATATCACAAAAAATATTACAGGATTATTTTACTATGATTATGATAGTTGATTTAGAGAAATCATTAAATTCTTTTGAGAAAACGGTTGAGGACTTGGTTGAAAGAGGTAAGAAATTATCAGTGGATGTAAAAATTCAGCGAGAAGAAATATTTAATTCAATGCATAATCTGTAG
HS-FS-000016-I-01_80_15	GTGCTATCAGATAATTTAAGTATAGGTCAAGTTGTTAAAGTTTCATTAGGACGAGATAAAGGAAATTTATTCTTTGTAGTCAAAATAATTAATAATGAATATGTATTAATAGCTGATGGAAAAAAGAGAAAACTTGACAAACCTAAGTTAAAGAAAGTGAAGCACTTAAAAAAATATAATTTTATTAATGATGAAGTTAGAAAAAGAGTAGTATCTGGACAAGAGATTACAGATTCTTTTTTAAGAGCTGAACTTACTAAGTTAAATTAG
HS-FS-000016-I-01_63_487	TTGGCTGGTAATCTAAATAATATGAGAGCAGTAAATAATTTTAGAGGAGATAAGAACATTTTAGAATGTTTAGTCAGCTTTGAGGGTCGTTCAATAAGTCAGAGAAAAGTAAGGGTATTTTTTAAAGAAAAACAAAATCAAATAGAAATTGATTTTGCAGAAGAGGAAATTTCTAAATTGGTTGAAAATGTTGTTTTAAATACATCATATCAAGAAATGTTATATGATGAAATAGAGAAACAACTGGAAATTGATTGTATAGGTACTTGGATGATATTATCTAAATTAAAAGATGGTAGTAGAGTTCACTGA
HS-FS-000016-I-01_67_142	ATGAAGATATTAGCAGTATGTGGTTTTGGTGTAGGTTCATCAATGGTATTAAAAATGACAATACAAAAGGCTCTAAAGCAGTTAGGTATAGAATGTGAAGTAGAAAATACAGATATAAATTCAGCTAGAGGTGCTGATTGTGACTGTATATTCACAAGTCAAGAATTGTTAAATGAATTAAAAGGAACTTGTAATGTAGATGTATATCCAGTTAAAAAGTACATGGATTTAGCAGAAGTCACAGAAGTTGTTCAAACTTTTTTAAGTGATAAAAATGATAAGAAATAG
HS-FS-000016-I-01_63_192	ATGAAAAATAAAATAAAGATATTAAGAGAAAAATTAGGATTGACACAAGAACAACTAGGAAGATTAGTTGGAACATCTAGACAGGCTATAAATGCTATAGAAACTGGTAAAAATGAACCTTCAATATGGTTGGCATATGATATTTCAAGAATTTTTAATGAACCAATTGAAAGTGTATTTTTATTTGAAGAAAGTGAAAGAAAATCAAGAGCACAGATAAGTAGGGGAGAATATTATGGCTATAAGAAAGATAAGAACATTTGA
HS-FS-000016-I-01_70_37	TTGGAATTTTCTAAAGAGGCCGTTGACAATTGTGTAAGTGGATTTATTGATATAGAATATAAAATGAAAATTATGATGGCTAGTGATGGTTTTTCATGTGGATATGATAGATATAAGATTTTTGATAAAAATGAAATGATGAAAATAGCAGAGATTAAAGGTATAGATTATATATATAGAAAGGTTAGGGAACTAGAAAAGGATGATGAAATGGCAATAGAGTTTCCTAGATTTAAAATCTATGATGATTCATCATGTGTATATTTAGAGATTTATAAATATTAG
HS-FS-000016-I-01_82_47	GTGAGAAATTATGAATTAGTTTATGTGGTAAAGCCAAATTCTGATGAAGAAGTAAGAGAGGCTATACTAAACAAAGTTAAGGAAGTTGTTGCAACTGACGGAGAAATAGTTAAAGTTGATACTTGGGGAACTAAAAAATTAGCTTATCCAATAGCTAAGTTTACAGAAGGTTTCTATGTATTAGTTAACTTCAAATCAGCAGTAGACGTTCCTAAAGAGATAGACAGAAACTTAAAGATAAATGAAAACGTAATAAGACACATGATAGTTGTTGCTTAA
HS-FS-000016-I-01_68_87	ATGAAAATAAGACCATTAGCTGACAGAGTAGTAATTAAAAAAGTAGAAGCAGAAGAAAAAACTGCAAGTGGAATAGTTTTACCAGGAGCAGCTAAAGAGCAACCTCAAATAGCTGAAGTTGTAGAAGTTGGACCAGGTGGAATAGTTGAAGGGAAAGAAATAAAAATGGAATTGACAGTGGGAGATAAGGTTATATTCCAAAAATATTCTGGAACAGAAGTTAAGATAGAAGGACAAGAATACACAATACTAAGACAGAGTGATGTATTAGCTGTTATTGAATAA
HS-FS-000016-I-01_84_21	GTGTATTATATATCAGTTTCAGTAGCATTACAACCAGGTTCATCAAGTATAAATCAATATTCTTTTGCTATCCTATTCCCAATTTTAGGAGGAAAAGATTTGGCAGGGCTTACTACTGAGCCAGGAGGCGGAGGAGTACTTTCTGGATATTTTGCTGGTTTTTTATTTGGGGGGACTACTTTTACAATAAATAATTTTTCATCTACAACAGTAGGGATACGAAATGGGCAATCAGCAGGAACTGCGGCTACTTTGACGATATTTAGAATAGCTGATACTGTTATGACTTAA
HS-FS-000016-I-01_80_36	ATGACTAATCCACATGATGTAATAATAAGACCAGTTGTAACTGAGCACAGTATGGCTGAAATGGGTGAAAAAAAATACACTTTTGTTGTGGCTAAAGATGCGAACAAAACTGAAATAAAAAAAGCAGTAGAAAAAGTATTCGGAGTTAGTGTTGATAAAGTAAATACTTTAAACTACGATGGAAAAGTTAAAAGAATGGGTAGAACTCAAGGAAGAACAGCAAGCTTTAAGAAAGCAGTAGTTAAATTAACTGCTGATAGTAAAGAAATAGAATTCTTCCAAGGAATGTAG
HS-FS-000016-I-01_63_35	ATGATTAAGATATTGTTAGTGTGTGTTGGAGGCATGTCTTCTACCCTATTGGTAAATAAAATGGAGAAGGATGCAAAAAAAAGAAATATAGACTGTAAAATATGGGCAGTTGGAGAAGGAGATATAAAATCGGAGCTTGATAACTTTGATATTTTACTTCTTGGACCACAACTTAGATTTATGCTTGATGACGTAAAGTCTATAGTTGGAGATAGAGTTCCAGTATCTATAATAGATATGGTAAACTATGGTACTTGTAATGGTCATGCTGTGTTAAATTCGGTTTTAGAAATATTAAAATAA
HS-FS-000016-I-01_76_42	ATGTTAAACATGAATTTACAATTATTAGCATCTAAAAAAGGGGTAGGTTCTTCTAAAAATGGTAGAGATTCTATATCTAAAAGATTAGGTGTTAAGAGATTCGATGGTCAATTAGTAACTGCTGGAAGTATAATAGTTAGACAAAGAGGAACTAAAATACATCCAGGAACTAATGTTGGAAAAGGTAGTGATGATACTTTATTTGCATTAGTTGATGGTACTGTTAAATTCGAAAGAAAAGACAAGAAGAGAAAAAAAGTTAGTATATATCCAGTAGCAATAGCTGAGTAA
HS-FS-000016-I-01_72_44	ATGTATAAGGTAGGAGTAGTTGGAGATAAAGATAGCATCATGGGATTTTTAGCTCTTGGAATAGATATCTTCCCAGCCTATGATAGTGACGAAATTAAAAAAAGTATACATAAGTTGGTTGAAGATGAATATGCGATAATTTATATTACAGAACAGGCATCATTGCTTGCAAAAGAATCAATAGCAAAATACAAAGATTACCAACTTCCTGCCATTATAGTTATTCCAGGTATTGGAGGAAGTATGGGATTAGGTATGAATGAAGTAAGAGAATCTAGTAAACGTGCTATAGGTGCAGATATATTATTTAAAGAATAG
HS-FS-000016-I-01_67_82	ATGAATAAAAAATTAGTAGCATTATGTGCTTGCCCAATGGGACTAGCTCACACTTTCATGGCAGCAGAAGCAATAGAGCAAGCAGCAAAGGCATTAGGTTATGAAGCAAAAGTTGAAACTCAAGGTGCTGATGGTGTACAAAATGAGTTAACAAGAGATGATATATTAGGAGCAACTATGATAATACATGCAGTAGCAATAACACCAGAAGGTATGGAAAGATTTGATGGTTGTGAAGTTTATGAAGTTGAATTACAAGAAGCTATAAAAAATGCAGAAGGTGTTATAAAAGAAATAGAAGAAGATTTAGGAATATAA
HS-FS-000016-I-01_71_92	GTGTACGATAAGAGTAAAGAAAAAATAGAAGTTACTTTACCTGACTCTCTGATTTCTGAAGTTGATAGTATAGTTCAGATGGAGAACAGTAACAGAGAAGATTTTGCAAAAGCTGCTTTTCAGTTCTATATAACTCAGAAAAAGAAAATTCATATTAAAGAATCTATGAAAACGGGTTATAGAGAAATGGGTCAAATTAATCTGTCACTAGCTGAATTAGGTATGACAGTTGAAGAAGTATCTTCTGATGATAAAAATGAAGGGAAGATTGCCCAAGGTGAGTACTAA
HS-FS-000016-I-01_68_122	ATGAATAGTAAAAAAGAGGATATATATGAATTGAATTTTGGGCAATTAATAGAAGAAAAATCTGGTGTTATAGAAGAAAATCAAAATGTTTTTAATGCAAAAGTAAATGTAGCTGTTTCTATAGGAAATACAACAGAAACAATAAAAAATATATTAGATTTAAAAGAAGGCTCTATAATAAAACTAAGTAAGAATGTGGATGAAAAATTAGATATATATGCAAATGATAGATTGTTTGCTTATGGAGAAAGCATTATTACAAATGAGAAGTTATCTGTAAGATTATCTAAAATAGAAGATTCAGATGTAAATTAG
HS-FS-000016-I-01_71_56	GTGAATAAAGCTGAATTAGTATCAAAGATGGCAGAAAAAAGTGGATTAACAAAGAAGGAAGCAGAAGCTGCGTTAAACGCATTTATGAGTTCTGTTCAAGATGCACTAGTAAATAATGAAAAAGTTCAATTAGTTGGATTTGGAACATTTGAGACAAGAGAAAGAGCTGCTAGACAAGGAAGAAATCCAAGAGATCCAGAGCAAGTTATAGATATACCAGCTTCTAAAGCACCAGTTTTCAAAGCTGGAAAAGGATTAAAGGATATAATAAATGGATAA
HS-FS-000016-I-01_66_232	ATGTTTATTTTAAGATTTGCAGATGATGATGACAATTTATCAGTTAAAGATTTTACATCTTTAACTGATTTAAAAAAATATATTAGTGAAAATAATATAGATAAAACATGGCATCAAATTGAAGAAGTTAAAAAAGTAATACCTAACTTAAAAGAAGAATAA
HS-FS-000016-I-01_64_123	ATGCCACATTTGCCAGATTGGGCTGTTTTACTTTGTATCTTACTTCCAATAGTATATAAAGCTTGTCAGATATTTAAAAGTAAAAAATAG
HS-FS-000016-I-01_67_29	ATGAACAATATCAGTTGGGAAGTTTTTAAAAAAACAGGTAGTATAGATGCATATTTATATTTCTGTGATTGCAAAAACATACATGAAGAAATTGAAGAAGTAAGGGAGAAAAAAGAAGACGATGATAATCCTGAACACCCAGGGGATAGTACTTAA
HS-FS-000016-I-01_65_257	GTGTTTAAAACTGTATTTGAAGATAAAGAATATGTTTTATTATGTAAGAATTATTCTAAAAGTGATGGAGTAAAAGCAATATTTATTTATTTGATATCTATGTTACTATTGTTTTTCCAAGGTTATTTGTATACAACAAATTTAAGTTCAACAATTTTAACTAACTCACAAATGATATTGTCAATCTTGATTTTACTTATAGGGCTGGGATTTGTACTACTTTCGAAGGAAAAACTAAATACGATTGGGATTACAATGTGA
HS-FS-000016-I-01_64_158	ATGAAGATAAAAGTGGAGGATATACCAGTTCAATTTCATGCAATGGTAGAAATAATCGGAATTGATAAGTTCATAGAGGTTGCCAAGTTGTATGGAGGAACAAATACTTATATACCTACGTATAAGGGGCTTTTTAGATATGCTAGAAATAGGGATATAGTAAAACAATTTAATGGAGTCAACCATAATGAATTGGCTATTAGATATAATATGTGTGTAAGCAATATTAAGCGAATACTCAATGAAAATAATGTTTAA
HS-FS-000016-I-01_63_179	ATGGTAAAAGAGATTGAGAGAGCTGGTATAGCAGTTGTTCATATATGTACAGTAGTACCAATATCACTTACAATAGGAGCTAATAGAATTGTTCCAGCAGTAGGGATACCATATCCACTTGGAAATCCTATGTTAGGAGAAGAGGAAAGTAAAAAAATTAGAAAGAATATAGTTTTAAAAGCTTTAAATGCACTAACAGAGGATATAGAAGAACAAACAGTATTTGAATAA
HS-FS-000016-I-01_65_117	ATGAACACACAATTTAGAAAGGGTGTTTTAGAAATTTGTGTACTTGCTCTCATATCTAAGAAAGATATGTATGGATATGAGATAGTACATAACATCTCTAAAGTAATAGATGTAAATGAAGGAACAATATATCCTATTCTAAGAAGACTTACAAAAGATTTGTATTTCGAAACATATATACTAGAATCTAATGAAGGTCCTGCTAGAAAATACTATAGAATAACTTCACTAGGAAAAGAGAATTTATCCAATCTGATGGAAGAGTGGAGAGAATTTGTAAAGGCTGTTGAGATTTTAATAAGTGAAGATGAGGGAGGTAATGAACTTGAATAA
HS-FS-000016-I-01_64_84	ATGGCAAGAGTTAAAAAAGCTATGAACGCTCGTAAAAAGCATAAGAAAATATTAAAACTTGCAAAAGGATTCAGAGGATCTAGAAGCAAATTATATAGACCAGCAAATACATTCGTAATGAAAGCATTAAAAAATGCTTATATAGGAAGAAAGTTAAAGAAGAGAGACTTCAGAAAACTTTGGATACAAAGAATAAATGCAGCTGCTAGAATGAATGGAATATCTTATTCAAGATTAATGAATGGATTAAAATTATCTGGTATTGAAGTTAACAGAAAAATGTTATCTGAAATGGCTATACAAGACCCAGAAGGATTTGCAAAATTAGCAGAAGTTGCTAAAGCAAAATTAGCTTAG
HS-FS-000016-I-01_77_44	ATGAAAGTAGCTTATATTTTTAGTAGTACTAATACACATAAAATTCTAGACAAAATGATAATACCACAACTTGAACAAGGAACTCATGGAGTAGACGTTCTAGGGATGTTTTTCTTTATGGATAATACCTTATTTTTATCTAAAGGTAATCCAGTAGGCGAGAGACTAAGTAAATTACATGAAAAAACTGATATGATAATAATGGCTTGTGACCAATGTGCTATAGAAAGAGGTATAGAGAATAATTTGGTTGATGGAGCTACAATTGGATGTTTCCCAAACCTATATGCTTGTTTAGGCAGTGCAGGTGTGGACCAAGTTATAACGTTATAA
HS-FS-000016-I-01_71_1	GTGAAAAAAGTTGCTTTAATTTTAGCTATAATAGGTGCGCTTAACTGGGGTGCAATTGGTATTCTAGGTACAGACTTAATAGGTAGTATCTTTGGTGGAACATATGAAATGGTAAGTAGAATAATATACTTCATTGTAGGTTTAGCTGGATTATACTTAATACCAAGTTTAATGTCTGATGATAGAGAATAA
HS-FS-000016-I-01_63_638	TTGGAAAGTAAAAAGGCAAGAGCATTAAAAGGTAAAGATAATAAAAGACTTAAAAGTTCACTTTTAGTTGGAAATGAGTCGACAGCAGCATGGGCTGATGTTGAAAAATTAAAACCTCATAGTAAAGTTTCAATACCTTCAATTAAGGGTGTCGAAGAAGCAAAAGACTGGGTTGACAATGGAAGTAAATTATAA
HS-FS-000016-I-01_84_58	ATGGATAATAATTTAATAGGGCTTATAGAACATGTAGAAAATCCAGCCATTTTATGTAAAGAATCAGGCGAAATAATATACTGTAATCATCTAATAGATAGTATTTTTAGTTTTCTAGATATAAAAAAGCCTAGAAATATAAATGAATTAGATTCAAATTTTGACAAAACAGAAATACTGACAGATAGTAAAAAGAAAATAGCTTTCAGAGAGTTAAGGATGACTGCACATATATACAATATGAAAGATAATAATAATGAAAATAATATAGTTTATTTATTTGAGAAGTCTCTAATATCTGATAAAGTAATTGAAGATATAATAGAGCATATAGATGAAGTTGTTGTTGTGTTTAACAAAGATGGGGTAATTGAAAAGATGAACACTGTCAGTGATGAG…
HS-FS-000016-I-01_81_17	ATGATAAAACAATTTGTCAAATATTATAAGCCATATAAGAAAATTTTTACACTAGACCTTATAGCAGCTTTTCTATTTTCCTTATGTGATTTAGTTTATCCTATGATAACTAGAAATATAATGGATGACGTTGTTCCAAATAAAAACTTAAGAATGTTAGTAGTTTTTGCAGTAGCACTTATACTTATATTTATAGCAAAAGCAGGGCTTAACTATTTTATGCAGTATTGGGGACATGTTATTGGTGTAGATATGCAAGCTGATATGAGAAATGAGGTATTTACACACTTACAAAGACTTCCAAATACGTATTTTGATAATAACAAATCTGGAGTAACTATGTCTAGAATAGTAAATGATTTAATGGATATAACAGAACTTGCACATCATGGTCCTGAA…
HS-FS-000016-I-01_67_84	ATGATAACTAAGAAACATGCAATAATAGTAAAGAGTTTAAGCAATAAAGATGGATATATGACATCAAACGAATTAGCTATCAAATTGGATGTGTCTACTAAAACTATTAAAAGATATATAGCAGATTTAAATAGTGTTTTAAGCAAATATGATTTGGTAATAGCTTCTTCTAGAGGTATAGGATACAAGTTAAGCGGTTCTAAAAACAATATAGCCAGAGCTGTTAAAGAAGCAAATAAATATATTGATGGTTTTTTAGATGACTCTGAAGAGTCAAGAATGTCAAATATAATATGTATGCTTATTAATAGAAATTATATGAGTATAGAAGCAATGGCAGAAGAATTAAATCTAAGTATAGCCGCTATAAATAAATTGTCTAGTAAGCTTAAAAGAAAA…
HS-FS-000016-I-01_70_32	ATGCTTGTGTCGAGGCAAATTGAATTTCTTAAATTGATACTAAACGAAAATAAATATAGACCTATAAAATACTTTAAAGATAAATTAAATGTATCTGATAAAACTTTACAAAAAGATTTGAAGATGATTGAGAAATATTTAGAAACTTTTAATATAAAAATTGATATAAAAAGAGGCTATGGAATATTAATAGAAGATTTAGCAAAGAAGAACATAGACTTAATTAATAGTTTAAATATACAATCGAAGGAAAATAAATCTTTATCAGTAGAGCAGAGAAGAATGGAGATTTTAAAGTATTTATTACTAAATTCAAATAATATAACTTCAATAAATCAGTTAGCAGATAAATATTATGTAAGTAAAACTTCTATAGTAAATGATTTTAAATATATAGAG…
HS-FS-000016-I-01_75_48	ATGTGCGTTATATCAAAAGATAGAGCAAAGGAAATAAAAATAGTAGATACTACTTTAAGAGATGGAGAGCAAACAGCTGGGGTTGTATTTGCAAATAGAGAAAAAATAATGATTGCTGAAATGTTAAGTGACCTAGGTGTTGACCAAATTGAAGTTGGTATACCTACTATGGGTGGAGATGAAAAAAATGTAATAAAGCACATATGTAGTAGAAATTTAAAATCAGATATAATGGCTTGGAATAGAGCAGTAATAAAAGATGTTGAAGAATCTATTTCTTGTGGTGTTGATGCAGTAGCTATATCAATATCAGTATCTGACATTCATATAGAAAATAAATTGAGAACTTCTAGAGGCTGGGTTTTAGAAAATATGGCTAAAACAGTTGAATTTGCAAAG…
HS-FS-000016-I-01_79_30	ATGAAGATATTTTCTAATAAAGATATAAAAATATTTTTTTTAATTCTTATATCTATTTTAGTAATGTTTATTATAGTAGGGCAAATAGTGGTTATAAGTATAACTAACAATTATAAAAAAACGTTGATAGAACATGATTATAATATAGCTGGATACTTATATAGTATAGGTGTTGATAAATCTAAAATACCATCAGCATTTGTTGCACATGAAGATAAATATATTTTAAAAGGAAAAGAAATACTAGATACAGCTGGATATGGATTTGATATAGATGTTAGCTTTACACCAAGTGTAAAATTGTTTCAAAGTAAATATATAAAAACTATGTCTATCTATTTATTAGTATTTTTTACTATGATTATTTTCATACTATATATGTATTTTTTTAGGCAACAA…
HS-FS-000016-I-01_64_127	ATGAGTGATATGTTATTATGGTTTAGTGTCGTATTAGTTTTATTTGCTATTGGGGATTTAATTGCAAGCAAAACAAAAGCAAAAGTATCAGCTGTATTTGTTACACTACTTTTATTTTTGATTCTATTTGTCACAAAAGCAATACCAGCTGATATTATTGAAAAAGCAGGTATGACCGCAGCAGCTAGTTGGAGTGTTCCAATGATTATGTTTAGTATGGGAACAATGTTGAATGTTAAACAATTTATAGACGAATGGAGAACAGTATTGACAGCATGGCTTGGAATTGTAGCAGTTATAGTCTGTGTCTCATTATGTATTCCTTTGTTTGGAAAATCAACAGTATTGACAAGCATACCAGTTATAAATGGAGCTTTACCTGCTACTACTATTATGACA…
HS-FS-000016-I-01_74_36	ATGACTAATGGCAGTTATAAAATGAAGAATTTAGTGGAGATATCCGCTATGGTGACGGAATCTACAGATTTTTTTAATATAAAAGATGACATAATAGAAAAAATGTTAGAAGTTGTTCACCCTACAAAGGCATGTGTAAATCTATTTTATAAAAATGATTCTAAATATGCCTACTTAGTATGTTCGCAAACCTTAGAATATGTACCTCAAATTTTTCCAATAAATAGTCTTAAAGGTGCAAAAATTGATTTTGACACATATCCAGAGTATATACATGAGGCTGTAAATGAAAAAAAGATAATATATGTGGAAAATGTATTTGAAGATTCTAGAGCAGAAGGTGAACGAGATTTAGCAAAAGCTGAAGGTTATATTGGGAGAATAGTTTTTCCTTTTATA…
HS-FS-000016-I-01_67_182	ATGGCATTAGATGGATTAGTTATACATTCAATAGTCGATGAATTATCATCAAAACTTACAGGTGGAAAAATAGATAAGATACATCAACCTGAAGATGATGAGGTAATTTTTAATATAAGAAATAATAAAGAAAATTTTAGATTGGTTTTAAGTGCAAGTGCCTCAAATCCTAGAGTTTATCTTACAAGTAATTATCAAAAAGAAAACCCTCTAAAAGCGCCTATGTTTTGTATGTTACTTAGAAAATACATACAAGGTGGAAATATAGTAGAAATTTCTCAAATAGGTTTTGAAAGAATAATAAAAATAAGTGTTGAATCTTTAGATGAATTAAAAGAAAAGACAGTTAAAAATATTATGATTGAAATTATGGGAAGACATAGCAACATAATAATAACT…
HS-FS-000016-I-01_65_33	ATGAAATACATAATAAAAAGAGATGGTACAAAAGAACTTTTTAGTAAAAGTAAGATTGAAGATGCTGTCTATAAAGCTAGTATAAATAGTGAAGGTGGAGTAGATAGAGAGTTGGCATATGATATATCAAGAAAAATAGCTAATGACTATAATTCTATGGAAAAATGCTTATCCGTAGAAGAAATACAAGATATAGTTGAAGTACTACTTATGGAATCAAATAGAAAAGATATAGCAAAACACTACATATTATATAGAGAAAGACGCTCTGAAATAAGGACTAAAGCTTGGGAGTTTGATGAATTACAAAAATCAATATGGAAGAACAAGTATAGACATAATGGTGAGAGTTTTGATGAATGGATAAAGAGAATTTCAAATAATAGTTCAAGAATATCA…
HS-FS-000016-I-01_65_96	ATGGCCACGAAAAAGAAGAAAAAAAAGAAGGTAAATACCTTAAGTTTTAATGCAGAATATCATAATTTAATAACAATATTTATAGGTGTATTTTTATTATATAGTTTAAATTCTAATTCTATGGGATGGATACCTGTGTTAATGCAAAATCTTTTTAAGGGACTATTTGGAGGGCTTTCAATAGCAATACCATTTATAGTAATTATAACAGGACTTTTAGGATTTTTTGATGGAAATGAATATATATATAGGCTAAGAAAGACTAAACTATACTACATAATTATTTTATTTATATTTGTATTTTATGGATTATTAAATGCAGGAACTCTTCCTGTAGATAGCCCACTAAAAGGTAACATGTTTGATGATGTTATGAAATTGGGTGTAAGTGGACAAGGT…
HS-FS-000016-I-01_74_62	ATGGAATTTCATCATGTATCAGTTCTTTTAAATGAGTGTATAGAGAATTTAAATATAAAGCCAGATGGCGTGTATGTTGACTGTACTATGGGAGGAGCAGGACATTCTAAAGAAATAGTAAAAAAACTGTCAGATAAGGGATTATTTATAGGGTTTGACCAAGATAAAAATGCTATAAGCACAGCAAAAGAGAGATTGAGTGAATATGAAAGTAGAGTGAAGTTTGTTCACAGCAATTTTGAAAATATAAAAGAGGAATTAGAAAAAATAGGAGTTTACAAAATTGATGGTGTATTAGCTGATTTAGGAGTTTCATCTCATCAACTTGATGAAGCTGATAGAGGATTTTCTTATATGCAAGATGCACCACTTGATATGAGAATGGATGTTAGGTGTGAG…
HS-FS-000016-I-01_70_76	ATGGATTTAAGCAAAAAAGTAAAAATTTTAGAAAATGCATCAGATGGCAAAAGCGAATTTGAAATATTAGAATTTGAAAAACTTGAGGGAGCTTCTAGCCCATTAATGGCAATGGGATTATATTTTGCTAGAGAAGCTGGTTTGAAAGCTAGACAAATTAAGATAAAATTAAATAATTCATCAATAAAAACAGAAGCTGGTGCATTATACTATTATAAAGGAAATATATCTTCTGAAACTAAGATTGGTGGTGTTGGAGGTCTTTTTAAAAAAGGAATATCAGGAGCACTTACTAATGAATCAATGATGAAACCTGTATACAAAGGTACTGGAGAAGTTTATTTGGAACCTTCTTTTAGACATTATTTATTTATGAGTCTTGATAATGATTCTATAATT…
HS-FS-000016-I-01_76_60	ATGAATAAAATTTGCAAAATATTAAATATAAAATACCCAGTTATCCAAGGGGGAATGGCATGGGTAGCTACTGCATCATTAGCAAGTGCTGTATCTAATGCAGGAGGACTTGGCATAATAGCAGCAGGAAACGCACCAAAAGAAGCTATAAAGAAAGAAATTGTTGAGTGTAAAAAATTAACAGATAAACCTTTTGGAGTAAATGTAATGCTTATGTCGCCATTTGTTGATGATATAATTGATTTGATTATAGAAGAAAAAGTTCAAGTTATTACTACTGGTGCTGGAAATCCTGCAAAATATATGGATAGATTAAAGGAAGCTGGAACAAAGGTTATTCCTGTAGTACCTACAATAGCTTTGGCACAAAGAATGGAAAAGTTAGGAGCTACAGCAGTA…
HS-FS-000016-I-01_63_92	ATGAAAGAATACAATAGTTTGTTGATAGATATATCTAAAAAAGGTAGGAAAGCATACTCACTTCCAAAGTTAGATATAGATGATATAAAAATAGAAGATATGATTGACCAAGATATGGCAAGACAAAGTGAGTTGAATTTGCCAGAAGTTGGTGAATTAGAATTAGTTAGACATTATACATTATTATCAAATAAAAACTTTGGAGTTGATACAGGTTTTTATCCTTTGGGTTCTTGTACTATGAAATATAATCCTAAAATAAATGAAGATATGGCAGCACTTCCAAACTTTACTGGAATGCATCCATACCAATCTTCGGATACAGCTCAAGGTTCTCTTTCTTTGATGTATGATTTATCAAGAAGACTTGCAGAAATTACAGGTATGGATGAAGTTACA…
HS-FS-000016-I-01_64_143	ATGATAGAAATAAAAACTATAGAAATAAATAAAAAAAGTCAAATTGACCTTTTAATGTTAGCCGACCCATGTGAAGAAATGATTGATAAATATCTCAATAAAGGAACTATGTACGCATTGTATGATAATAAAGAACTTACTTGTATAGCAGTTGTAAATGAAATTTCCAAAGAAATATGTGAATTAAAAAACATTGCTACATATGAGCATTTTCAAAATATGGGTTATGCCTCAAAGATGATTTATCATCTTTTAGATGTTTATAGTAAAAAATATTCATCAATGGTTGTTGGTACATCTGAAAGCGGAGTTCCTTTTTATGAGAAGTTTGGATTTGTTTATTCACATAAAATTAAAAACTTTTTTGTAGATAATTATCCAGAACCAATCTTTGAAGGA…
HS-FS-000016-I-01_77_42	ATGAATTTAGAACAAGATGTTTTAATAGTTGGAAGTGGAGTTTCAGGATTATACTGTGCATTAAATTTAGATAAAAGTTTAAATGTGCTAGTAGTATCGAAATCAACAATTGAAAACAACAATACATATCTTGCACAAGGTGGAATTTCAACTGCTAGAAATATTGATGATATAGAATCCTTTGTAGAAGATACAATGAAGGCTGGGCAGTATAAAAATAGAGTTGAAGCAGTTCAAGTACTTGCAGATGAATCTATAGAAAATGTAGGGCAGATAGTAGAATATGGTATGCCTTTAGACAAAGAAAATGGAGAGATAGATTACACAAGAGAAGGAGCACATAGTGTAAATCGAATAGTTCATAGTAAGGATAATACTGGAGAAGTTGTTTTTAAAACT…
HS-FS-000016-I-01_63_12	ATGAAAAGTATTAAAACATCAAGTATGAAAGAAAAGGTAGATGAAAAGATATTAAGAGAGCAAGTAAGTTCTATAATAGAAGATATAAGAAATAATAAGGATGTTGCACTTAAAAAATATAATGAGAAGTTTGATAGAAATACAAGAGATGAATTTAGAATTACTAAGGAAGAAATAAAGGAAGCTTATAAGCATGTAGATGACGAATTTATAAATAACTTAAAGATTGCTGCCAAAAATATAAGAGAATTTGCTAAAGCTCAAAAACTAAGTTTTGAAAACCCTTTTGAAAAAGAAATTTATCCAGGTGTAATCTTAGGTCAAACTAATATTCCAATAGAGTCATGTCTTGCATATGTTCCAGGAGGTCAGTATCCATTGTTTTCAACAGCTCTTATG…
HS-FS-000016-I-01_71_73	ATGAATATACTTATTGTGTGTACAGGTAATACTTGTAGAAGCCCTATGGCTGAGGCTATACTAAGGAAAGCAATTAAAGAATCTGGAAGAAGTATTGAAGAATATTCGATATCATCAGCAGGTATATCTACAGCAAATGGAATGGGTGCTTCTGAAAATTCTATAGAAGTACTAAAAGAAATCGGTATAGACTTATCAAATCATAGAAGTAAAGTAATTACTAAAAAATTAATTGATGAATCAGATATAATACTAACAATGACTAAATCTCATAAAGAAATTTTAGTACAAGCAGTTCCAAAATGCAAAGAAAAAGTGTATACTTTTAAAGGGTTTGCAAATAAAAATGAGGAAGATATATCTGACCCATTTGGTGGAAATTTGGATATTTATAGAAGC…
HS-FS-000016-I-01_80_24	ATGACAATGACAGATCCAATTGCAGATATGCTTACTCGTATAAGAAATGCTAATGTTGTTAAGCATGAAACTGTAGATGTTCCAGCTTCTAATATGAAGAAAGAATTAGCTAGAATCTTATTAGAAGAAGGTTTCATAAGAGGTTATGATGTTATAGAAGATGGAAAACAAGGTATCATAAGAATACAATTAAAGTACGGACAAGAAGGCGAAAGAGTTATAACAGGTCTTAAGAAAATATCTAAGCCTGGAATGAGAGTTTACGCTGCTAACCATGAGATACCAAAAGTATTAAACGGATTAGGAATATCAGTTATATCTACTTCAAAAGGAATATTAACTGACAAGCAAGCTAGAAAAGAAAATGTTGGTGGAGAAGTAATCTGCTACGTTTGGTAA
HS-FS-000016-I-01_76_75	TTGGAAATAATGCAATTAATAGGAATTGCAATCATTTCAACTACACTCTGTTTAGTAATTAAAAAAGATAGACCAGAGATAGCAAATTTCATAGCAATAATAACTGGAGTAATAATACTATTGTCAGTTATGTTTAAGCTAAATTTTATAGTAGATAGTATACAAGATTTGGCTAACAAGGCTAACATACCGACTATGTATATATCATTAATAATAAAATTAATTGGGATAGCATACTTAATGGAATTTGCGATACAACTTTGTAAAGATTGTGGGGAAGGAAACATTGCTTCAAAACTAGAATTTGGAGGTAAAATAATAGTTATGTCAATGTCTTTCCCTATACTTTTGTCCATTGTAGAAATGGTGGTGAATATAATTCCATAG
HS-FS-000016-I-01_67_83	ATGGGAACAAACATATTTAACAAAGAATATGTATTTTTAAATGTTGATGCTAAGTCAAAGGTTGAAGTTTTAAAATTTATATCAAAAAAAGCTAAAGACTTAAATTTGGCAGAAGATGAGAGCTTAGTATATGAAGGTTTAATGGCTAGAGAAGAACAATTTACTACAAATTTAGGAGAATCTATAGCAATACCTCACACTAAAAATGATGCAATTGAAAATCCAGCAGTAGTAGTATTGAAGTTTAATGAAGATGTTGTTTGGAATGAAGGTGAGGATAAGGTTAAATTAGCAATAAGCTTACTTATGCCAGGAAAAAGTAAAGAGAATATTCATCTTAAATTATTATCATCTCTTTCAAGAAAATTAATAAATAAAGAATTTAAAGATTCTCTTTTA…
HS-FS-000016-I-01_63_252	ATGGGAGATTATAATAAAATGATTGAATTAAAGAATAACTTAGGTATCAGTGAAAGAAAGTTAAAATATCCTTGTATCTATAAACATTTTAAAGGGAAATATTATGCTACAATGGGTCTTAGCAAGGCTATTGATGATATAGAAAACATATGTGAAATATATGGTAAAGAAAATTTAATCCAAAACAGAAATAAATATAAATTAGTTATTAGACATACTGAAAGAGAAGAAGATATCTATGTTTATAGGGATTTAGATGGAAACCTTTATCATAAAAAAGAAGAAGATACTAATGATTTAGTTTTATACAAGACCTTATATGATGATACAGGAATATTTGCAAGACCTTTGGATATGTTTTTAGAAAAAGTAGATACAGATAAGTATGTCAATTCAATT…
HS-FS-000016-I-01_63_334	ATGGAATCTAAATTTTTTAATTGGTACACTCAATCCTTAGGGGGAACTTTTGGCATTATATCATGTATATGCGCATATTTAAATGGATACATGTTTGTTTATACAAATAGTGCTAGCAAATATTTTGAAAGTATAGGATTTCTGGGAATAATTTCAAGTTATACACTACTTCCACTTTGTATGCTTACTTTGATTTTTGGAGTTATATATTCTTATACTCCAGAAACATCCGACAAAAGTATTTTTAATATACCTTTTTTTACTTTAAATAAAAGATTAATACTTATTACAGTAGTTTTTGGTTTTATAGGTGCTAGAGTTTACTTTATAATTCCTGCAATTCTAATAACTTTTAACCTATATAGTAATGTTTTGATAGCTAAATTAAAGTACATCCTA…
HS-FS-000016-I-01_88_7	ATGGAAAGTTCATTTTATATGAAAGAAGCATTAAAAGAAGCATATAAAGCATATAATAAAAAAGAAACACCAATAGGTGCTATTATAGTTAAAGATAATCAAATAATAGCTAGAGCTCATAACCTTACAGAAACGTTAAAAGACTCTACGGCACATGCAGAAATTTTAGCGATAAAACAAGCATCAGAAAAATTAGGTGGTTGGAGGTTGACTGATTGTGATTTATATGTTACAATGGAACCTTGCATAATGTGTAGTGGCGCAATAGTTAATTCTAGAATAAAAAAGCTTATAATAGGGACAAGACATGTAAAAAATTCATATATAGAAAAACAGCATGAGTTTAAATTAGATTATTTTAATAATAATAATGTAAAAGTAGCTTTTGATGTTTTGCAA…
HS-FS-000016-I-01_68_121	ATGGGGATAAATATAGATAAGCTAAACATAAGTCCAAGTATAAATATGGAGGTTAAAAAACTAAAAGAGAGTAATAAATTTTCTGACAAATTAAACTCTTTAAAACAATCTTCTTCATTGGAAGATATAAAACGAAATTTGGAAAGTGTAAAAAAGGCAGGAGAAAGGCTTGTACTTACTCAAAACTATGGCGACATTAGTATATATAAAAATGCAGTAAAAGAATACCTAAAATCTGTTGTAGATAATATGTATTCACTTGATAAAAATAGTAGCTTTTGGGAGCATCAGTATTATAAGAATGTAAAGATTGTTGATAGTAAACTTGAGGATATGACTAGTAAGTTAATTAGTGAAGAAAAAGAAAACATAGATATTGTTTCTACTGTTGATATGATA…
HS-FS-000016-I-01_63_571	ATGATTGAAACTAAAATAAAATCCATTGCACTAAAAAATAGAGAAAAAATCATAAAAATAAGACGACAGATACACAGTAATCCAGAGTTAGCATTTAAAGAATTTAAAACATCCAAACTTATAAAAGAAGAGTTAAATAAACTTAAAATAGAATACATAGATGTTGCTGGTACAGGAGTATTAGCTACTATAAAAGGAAAAAATAATGGTGGGAAAACTATATTGCTTAGAGCGGATATGGATGCCCTTCCAATCAAAGAGGAAAATGATTTAGAATTTAAATCAATAAATGATAATATGCATGCTTGTGGGCATGATGCCCATGTTTCATGGTTGTTAGGAACAGCAATGATTTTAAATGACATAAAAGAAGAATTGAATGGAAATGTAAAATTACTA…
HS-FS-000016-I-01_68_114	ATGAAGATATTGGTTGTAGGCGGTGGCGGAAGAGAGCATGCTATATGCTGGAAACTAAGCAAAGAAAAAAATGTAGAAAAAGTTTATTGCGCGCCAGGTAATGCAGGAATTACAAATGTAGCAGAATGTGTAAATATAGGTGATACTAATATAGAAGAACTTTTAAAATTTGCCAAAGAAAATGAAATAGGTCTGACAATAGTAGGACCAGAAGTACCACTAGTTATGGGAATAGTAGATGAGTTTGAAAAAGAAGGATTAAGAGTATTTGGACCTAATAAAAAATGTGCTCAACTTGAAGGAAGTAAAGCTTTTTCAAAAGAATTTATGATAAAACATAACATACCTACTGCAAAATATAAAGAATATACAAACTTAGAAGAAGCTATATCAGAAATA…
HS-FS-000016-I-01_63_428	ATGGAGATTATAAAGGGTGGAGTTACAGTTTCAGAAGGATTTTTTGCTTCAGGGATTCACTGTGGCTTGAGAAAAAATAAAGAAAAAAGAGATTTAGCTTTGGTTTATTCAGATGTTTTATGTGATGCAGCAGCAGTAGTAACTCAAAATAAAGTAAAGGGCAATCCTGTTTATGTTACACAGGAACACATTAAAAATGGAAAAGCACAAGCTATCATAGTAAATAGTGCTAATGCTAATACCTTTAATGGAAAAGAAGGACTTATAAATGCTTATAAAATGGCTAAATTCACTAGTGATAAATTAAATATTAAAGAAAATGATGTTTTGGTTGCATCTACAGGTGTCATAGGAAAGCCATTAAATATAAATTTAATAGAAGAAAATATGGATGAATTA…
HS-FS-000016-I-01_63_645	ATGAATGAACAAACTAGAATATCCTTAGAGAGAGCTGCTGAATTAAAATCAAAAATTGATGATTATATTCAGGCTAGAAAAACGATTAACAGAGGTCTTGAAAAAGAAGAAGAGATAAATAAACGAAAACAGAAAATATTAAGTATCTTAAATGGAACTGAAGAGGATTGGAATAACTACAAATGGCAATTATCAAATAGAATAACAGATGTAGATACTTTATCAAAAATTATAACTCTAACTAAAAAAGAAAAAGAATATATAAAAGAGGTTGGTACTCAATTTAGATGGGCAATATCTCCATATTATTTGAGTCTTATAGACCCAGAAGATATATGTGACCCAATAAAATTACTGTCTATACCAACACATATAGAGTTGGAAGATGAGCAAGAAGAT…
HS-FS-000016-I-01_63_605	ATGGATATAAAAGAGTTAGTTAAAATGCAAAGAAAATATTATAATACAGGTAAAACAAGAGATATATCGTTTCGTATAGAACAGTTGAAGAAACTTAAGTTAGTTGTATCACAAAATGAAGAAAAAATACTTTTAGCACTAAAGAAAGATTTAAATAAATCGAATTTTGAAGGTTTTATGACAGAGGTAGGCATGTTTTATAGTGAATTAAACTTTGCTATAAAGAATATAAGAAAATGGAGCAAAATAAAAAGAGTTAAATCAAGTATGGTTAATTTTCCATCTATATCCAAAGTTGTTCCACAACCTTATGGTGTTACTCTCATAATGTCACCTTGGAATTATCCCTTTCAATTAGCACTTATACCATTAGTTTGGTCATTAGCAGCAGGGAATTGT…
HS-FS-000016-I-01_65_110	ATGACAATGAAAAAAAGATACAATATAGCTATAGTTGGAGGAGGCAGTACTTGGACTCCAGGACTTTTAAAGTCTTTATGTAAAATGAGTGATAGATTTCCTCTAAATAAAGTAACTATGTTAGATGTAGTAGAAGAACGTCAAAGATTAATAGGGGAATTTGGAAAAATATTATTTAAAGAAGAATATCCTAAAGCAACACTTGAATATACTACAAACCCAGATGAAGCATTTATAGATGTAGATTTTGTATTTGTTCAAATGAGAACTGGTGGTCTTAAGATGCGAGAATTAGATGAAAAGATTCCTCTACAATTTGGACTGGTTGGTCAAGAAACTTGTGGAGCTGGTGGATTTGCTTATGGGTTAAGGTCTATAGGTGATATGATAGAAATGGTT…
HS-FS-000016-I-01_82_66	ATGGATATAGTTTCTTTATGGGACAAAACCCTACAATTAATAAAAGGTGACTTAACTTCAGTAAGTTTTAATACCTTTTTTAAAAACATCGTACCATTAAAAATACATCTTAATGATTTAATCTTACTGGCTCCTAGTGATTTTAATAAAGATATCTTAGAGAATAGATATTTACATTTAATTGAAGATGCTATTAGTCAACTGTCATTAAAAAAATATAATATTAAATTTGTATTGAGCGAAAAAGAGGTTGCTGATTTAAATTCTGATAGCACAGATTTAAATTATAGAGTTCTTTACCCCAATCTAAATCCAAAATACACATTTGATACATTCGTTATTGGTAATAGCAATAGATTTGCACATGCTGCATGCGTTGCAGTTGCAGAATCTCCAGCT…
HS-FS-000016-I-01_63_498	GTGAAAGATTTAACTACAGGTCATGAGGGAAAATCCATATTCTTTTTTGCCATGCCTATGCTTATTGGTAGTTTATTTCAACAACTATACAATACAGCTGACAGTATAATAGTTGGTAGATTTATCGGAAAAGAAGCAATGGCGGCAGTCTCTGGAGCTAACCCTATAATGTTTTTATTGGTGGCAGCGCTTATGGGTGTTAGCCTTGGATTTTCTATTTTAGTGTCACAATTTTATGGCTCAGGAGATTTAAAAAAGGTAAAAGCTACTATTGATACTACATATATACTTTTATTTATTGGTTCTATATTAATAAGTATTCTTGGAATAGTATTTGGTGGCCCAATGCTTAAGCTTATGAATACACCAGAATCCGTTTTTGCTCAATCAAAATTGTAT…
HS-FS-000016-I-01_63_247	ATGGAATTGTGGAAAAGAAATTTATTTGTATGTTGGATAGGTATGTTTTTTAGTTCTATAGGGATGAGCCAAATAGCACCTATACTTCCATTATATATTAAACAGTTGGGGGTAACTGATGTTAGTTTAATACAACAGTATTCAGGTATAATTTTTGGATGTACCTTTGTAGTAGCAGCATTCTTTTCGCCAATTTGA
HS-FS-000016-I-01_73_23	ATGGAAAATAAACATGTAAAAACTTTATCTCAAGCTACTTTAAAGCAAAGTGCTGCAAAAGGTGGATGTGGAGAGTGTCAAACTTCTTGTCAATCAGCTTGTAAAACTTCTTGTACAGTTGCAAATCAAGAGTGTGAAAGATAG
HS-FS-000016-I-01_63_139	GTGAAGGTTAATGGGAAGGAAATTGAATTTGAAAAAGATTTGACTGTTATAGATTTATTAAATAAATATAATTTAAAAAGTGATAGAGTTGTAGTTGAAGTGAATTTAGAGATAATTGAAGAATCTAACTACAATACATATGTATTAAAAGACGAGGACATTGTAGAGCTTATTAGCTTTATTGGAGGTGGTTAA
HS-FS-000016-I-01_76_74	ATGGAAATATCATTGATATTAAAGGTTGCAGGTGTCGGTATTCTAATATCAGTATTGAATATGATATTGGAAAAAACAGATAGAAAAGATTGGGCAGGTCTTACTACATTAGCAGGTGTAATAATCGTATTGGGTATGGTAATAACAGAAATAAGTGACTTGTTTAATACTGTAAGAACAATGTTTCAACTTTACTAA
HS-FS-000016-I-01_63_401	ATGTTTTCAGTTATTTTTTTATGTATAGGGGGGTTTTTAGCTGCTTTTGTAGATTCTATAGCAGGAGGAGGAGGGACTTATAAGCATGCCTGTTCTTATGGCAATTGGAGTGCCAGTACATCTTGCCATTGGTACAAATAA
HS-FS-000016-I-01_64_112	ATGGGAGAACTACAAAAAATTCCAGGGGTAGGGAAAGCAACAGAAAAATCTTTAATCATGTTAGGATATACAACTATTAAATCACTTAAAGATGCAAACCCAGCACAAATGTATGAAAAGGAATGTTTAATGCGTGGACAGCACATAGACAGATGTCAGTTATATGTATACAGATGTGCAGTATATTTTGCATCAACTGAAAATCCAGAACCAGAAAAATTAAAGTGGTGGTATTGGAAAGATTAA
HS-FS-000016-I-01_67_37	ATGTTAGAAATATCCACTGATTTACAAGTAAATCAACCAGTTATTACTGTTACAAGTAATACGTTTATTAGTATAGAAAATTATCTATCAATATTAGAATATGAAGTTGATTTAATAAGAATAAAGACTAAAGTTAAAACAATTAAAATATCTGGGGATAAACTTTCACTTAAGTATATTACTGATAGTGAGATAGGTATAAAAGGGATTATCTACAATGTTGAGTATGTTGATTAG
HS-FS-000016-I-01_82_63	TTGAATAAAATAATTTATATATTAAAGGAAATAAGTAGGTATTTATCGAATTTATGTATTTATTTAGTGAGATTTTATCAAAAGTATATATCTCCCTTAAAGGGACCTACCTGTAGATTTTATCCAACTTGCTCACAATATTCAATAGAGGCGTTTAAAAAATATGGATTTGTAAAAGGTATGTATTTAACGATAAGAAGACTTTTAAAATGTCATCCTTTTCATCCAGGAGGTTACGACCCTCTAAAATAA
HS-FS-000016-I-01_63_148	ATGTTAATAGTAACTACAGAAAAAGTAGAAGGTAAAAAGATATCAAAGGTTTTAGGATTAGTGAGAGGAAGTACAATAAGAGCAAAACATGTTGGAAAAGATATAGGAGCAAGTTTTAAGAATCTTGTTGGAGGAGAACTTACTGGATATAATGAAATGCTCACTGAAGCAAGACAAATTGCCATAGGTAGAATGGTTGAAGATGCAGAAGCTAAAGGTGCAAACGCAGTAATAGCATTTAGACTGTCTTCAGCTTCAGTTATGCAAGGGGCAGCAGAAATGCTTGCTTATGGAACAGCAGTTGTTTTAGAAGATGATAATAGTATTCTTGAAAAATAA
HS-FS-000016-I-01_76_33	ATGCAGTTAAATAAAGAAGTGTTAAAAGGTTATATCGATATATTAATTGTTTCTATATTAGAAAAGAAAGATTGTTATGGATATGAAATTGCAAAGCAAGTAAGAGAAAGAAGTGAGTTTGAATTAAAAGAAGGAACAATGTATCTTGCACTTAAAAGAATGGAATCTAAAAATTTAATTAAATCTTATTATAGCAATGAACAAAGTTCAGGTGGAAGAAGAAAATATTATAATTTAACTAATGAAGGTAAAGATTTTTTAGAAATAAAGAAACAAGAATGGAGATTTATTAAAAAGGTTATGAATCAATTTTTGGGAGAGGTGGATTAA
HS-FS-000016-I-01_65_132	ATGTTTGCCAAAAGATTAAGAGAACTTAGAAAGGAATTTGGATTGACTCAAAGAGAACTTGGAGAAAAAGTAGGCGTTTCCCAAAGAGTCTTAGGGTACTATGAAACAGAAAACAGATTTCCTGATGAACACATTTTAAACAAATTGGCTGATGTATTTAATGTATCAGTTGATTACCTTCTTGGAAGAACCTTAGTTAAGGAAAATATTGATACAGTAGCTGCACATAGAAAAAATCCACATGAAGAGTTACCTGAAGAAGCACAAGAACAACTTAATGATTATATAGAATTTTTACTAAATAAATATAAAAAAAAATAA
HS-FS-000016-I-01_67_93	ATGAACTTATTAGTGATTGGTGGTCATGAAAGAATGGAAAAAGATTATATGGTTATGGCCAAGAAAAAAGGTTATAAGACAAAGGTATATACTACCATGTCATCTAAATTAAATAATTCTATAGGAAGACCAGATGCAGTTGTCATACTTACATCAACTGTTTCACATAAGATGTCTAGAACGGTTGAGTCTCAAGCTAAAAAACAAGATATATTAATCGTAAGGCATAAAAATAGTAGTAAGGTAGCATTTAATGAATGTCTAGATATGGTTGATGAATGTCTGGGAAATTGTTCAAAATGTAAGCTTAAAGACAAACAAAAACAAAAAAATATATAG
HS-FS-000016-I-01_67_41	ATGTCAGAAGTAAGAGTTAGAGAGAATGAAACATTAGACAGCGCTTTAAGAAGATTCAAGCGTCAATGTGCAATGTCTGGCATCATGTCAGAAGTGAGAAAAAGAGAGCACTATGATAAGCCAAGCGTTAAGCGTAAGAAAAAAGCTGAAGCAGCAAGAAGAAAAAACGCTAAGAAATAG
HS-FS-000016-I-01_72_112	ATGTTTTTTATCAGTGATATTTACACAAAATCACCTATTAAATTTGATACTCCATTGCAAAAAGAGGTATACAAAATATTACAAAAGTTAGATATTGACTTTGAACGTGTTGACACAGATGAAGCAATTACAATGGAAGATTGTGTTCAGATTAATAAAAAATTAAATATGAAAATGGTAATATAA
HS-FS-000016-I-01_74_79	ATGATTAGAGTTTCTGATATAATGGAAAAAGAAATTATAAATGTAAAAAATGGAAAAAGGATGGGGTTTATAATAGACATAGACATGGATATTCACGAAGGTAAGGTAGTCTCATTTACCATTTTTGGAGATGGAAGTAGAAGTTTTTTTTCAAGAGGAGGGGATGAAGAAGTTATATTTTGGAATGATATACTTAAAATAGGTTGTGATACAATAATAGTAAATATAGGTTCAGAATTAAGCTTAGATGAGTTTGAGATATAG
HS-FS-000016-I-01_75_101	ATGGAAAAAACTTTTAAGACTATTATGGAGCAGATAAAAATAGTATTGTTTATATATATTATTACTTGCTTTGGACAAATGATAGCACTTAAGACTCAGGCTCAAGATTTGTTGATTGGAAGTATATCTGGATTTTTGTTGGTGATAATTGCTATTATAATAAAGAATTTTGTTAAAAAACCTAATTTACCAGGTTTTGCATGGGCTACATTAGTTGCATTCGTTTTATCGCTTCCAATATCTCCAGTGGGGGATATCATAGCAACAAATGTAGGGAAAATCAATTTTATGTCTACAGTAACACCATTATTAGCTTTTGCAGGAATCTCTGTAGGTAACCAATTAGATATATTAAAGACTTTGAGTTGGAAGTTAGTAGTTATATCATTTATAGTTATG…
HS-FS-000016-I-01_63_149	ATGTTTAATGTTGCAATTATAACACTTAGTGATAAAGGATATGAAGGAAAAAGAGAAGATATAACAGGAAAAAAGTTAACTGAATTTGTTGAAAATACAGGAGCTTATAAAGTTACTGAGTATGTACTTATAAAAGATGATAAGGAAATGCTAAAGGAAAATATTATAAGACTTTGTAATAGTAATAAAATAGATTTAATTCTTACAAATGGAGGTACTGGTTTTTCAAAAAGAGATATAACCCCAGAAGCAACTAAGGAAGTGTTGGAAAAAGAAATACCAGGTCTGAGCGAATATATGAGAATGAAATCCACAGAAATTACTAAAAAGGCCATACTAAGTAGGGGTGTGAGTGGAATAAGAAATAATTCTATAATAATAAATTTACCTGGAAGTCCT…
HS-FS-000016-I-01_81_25	ATGATTAAATTAGTAAGAGTAGACCACAGACTTATACATGGACAAGTAGCATTTACATGGACAAAGTTTTTAAGCACAGACTGTATATTGATAGCAAGTGATGAATTATTAAAAGATGAATTAAGAATGGCAGGGCTTAAAATGGCTAAACCATCTAATGTTAAGTTAGTAATGAAAAGCATAGCAGATTCTATAAAAGCACTTAACTCAGGTGTTACTGATAAATATAACTTATTGATACTTTGTGAATCTGTAGAAGATGTTTATAGACTTGCTAAAGAGGTAAAAGCTATTAAATCTATAAACCTTGGTGGAACAAAATCAGATGATAATCGTGAAAATATATCTAAAGCAGTGCATGTATCAAAAGATGATATAAAGATGATTAAAGAGTTAGAT…
HS-FS-000016-I-01_68_50	ATGAAGTTTTTAAATGTTTTAATAGTAGTTGAAGATATTGAGAAATCAAAAAAGTTTTATTATGATATTTTGGGGTTAAAGGTAATCTGTGATTTTGGAGAAAATGTTGTATTAGAAGGTAATATATCATTACAAGAAAAAAAGCTTTGGTTAGAATTTATTAATAAGAGTGACAGTGAAGTTAAGTTCAATGGAAATGATGCTGAGTTATATTTTGAGGAAGATAATTTTGATACTTTTGTTGAAAGATTGAGTACAATGAAAGGTATAGATTATGTTCATCTAGCTATAGAGCATAGGTGGGGTCAAAGAGCAATTAGATTTTATGATTTAGATGGGCATATTATTGAGATTGGAGAAACTATGTCATCTGTGTGTAGACGTTTTTTAGATAGTGGT…
HS-FS-000016-I-01_80_26	ATGGCTTCTAGATTACAAGAAAAATACATGAAAGAAGTTGCTCCTGCTTTAATGGAGAAATTTGGATACAAAAACGTAATGGAGATACCTAAGTTAAATAAAATAGTTATTAACATGGGTATAGGTGACGCTAGAGAAAATCCAAAAGGATTAGAAAAAGGCGTTGAAGAATTAGAAATGATATCAGGACAAAAGCCTGTTATAACTAAAGCTAGAAAATCTGTTGCTAACTTCAAATTAAGAGAAGGAATGCCAATAGGAACAAAAGTTACATTAAGAGCTGACAAAATGTTCTACTTTATGGACAAATTAGTTTCAGTTTCTTTACCAAGAGTTAGAGATTTTAGAGGAGTTAACCCTAATGCTTTTGATGGTAGAGGAAATTATGCTTTAGGAGTT…
HS-FS-000016-I-01_63_99	ATGAGTATTAATACTGTTATTGCTAAAAATTTAAATAGATTACGTAATGAACGTAACTTAAGTCTAGGTCAACTTGCTGAATTATCTGGCGTAAGTAAAGTAATGCTTTCGCAAATTGAAAAGGGAGACTCAAACCCAACAGTAAACACAATTTGGAAAATTGCAAGTGGACTAAATGTTCCATATACTGCAATACTGGAACAACCTCAAAATGAAACTTTTATTGTATCAAAAACTGATATAGATGTACAAGTTTCAGAAAATAAAGATTATCGTCTTTATTGTTATTATCCCAATACACCAACTAGAAACTTCGAATTATTTCAAATGGAATTAGAAGAAGGTCATAGTTATACATCTGTTGGTCATTCTGAAAAATCACAGGAATATATTATGATT…
HS-FS-000016-I-01_66_10	ATGTCAAAAGAATTAGTAAAAGATAGAGTAATAAAATATTTAATAGAAGATTTATTAGTCCCTCAAGATATGATTGATACAAATGTTGAGTTGGCAGAATTTGAAGAAGGTGCAGAAGGAGTTTTAGATATTGTTGTAAATGTTAAAGATGAAGAAGATTATTATGCACCTGTAATGATAGTGCAATGTTTAGATGAAGATGTAGAGTTAGAAGGAGAAGTTTTACAAAAACAAATAGAATTTTTAGAAGAAGTGGATAATATAACTATGTCAGGTAGATTGGTTTTAACTAATGGGGATGCTATGATGTACGCTGATTGGAGAGGGGAAGAATACGATACTGAGGCAGCTCTTCCAACTTATGATATAATGGTAAAAGAGTTTCATGAAATGGAACAA…
HS-FS-000016-I-01_65_127	ATGAAAACTGGTGTAGTTAAATGGTTTAACAACGAAAAAGGATTTGGATTCATATCTGTAGAAGGTGAAGGAGATGTTTTCGTACATTTCTCAGCTATAACTGGAGATGGATACAAAACATTAGAAGAAGGACAAAGCGTTGAGTTCGAAGTAGTAGATGGAGCTAAAGGTCCTCAAGCTGCTAACGTAGTTAGATTATAA
HS-FS-000016-I-01_80_52	ATGGCTGCCCAAAAAAATGACGGTGCAAAAACTAAAAAAAGGTTTAGTTTATTTGGATATTTAAAAGAAACTAAGCAAGAATTAAAAAGAGTTACATGGCCGACAAAAAAGGAACTGTTTAAAAACACAAGTATAGTTTTAACTGTAGTTATTTCATGCACTATATTAGTATGGGGTATAGACACTATATTATCTGGTGCACTAGCGTTATTACTAAAATAG
HS-FS-000016-I-01_68_190	ATGGAAAATTTGATGGAATATTTACCACTTTTGATTCCTGTTATTATTTTAGATTTAATACTTATAATTACTGCACTTGTTCATGTATTGAGACATCCAAATTATAAAATTGGAAATAAGGCAATATGGATTATTGTAGTACTGTTTATTAGTCTAATAGGACCAATCTTGTATTTTACAATAGGAAGAGGTGAAGAATGA
HS-FS-000016-I-01_63_486	ATGAGAAAAAATAGTATTAATATAGCACTAACTGCAGCAATTACAGCAATCTATGCAGTTTTAACATTATCATTGGGATTTATAAGTTATGGACCAATACAATTTAGGGTAGCAGAGATTATGATGCTTTTGGCATTTTTAGATAAAGGATATATAGTAGGTCTTACATTAGGTTGTTTTTTAGCAAATGTAATAGGACCATATGGTGTACCTGATATAATTTCTGGAACATTAGCCACATTTATAAGTGCAAGTATGATTTATATTACTAGAAAGTTAGGTAAACAAAATAAAAGTACTTTAGTTATAGCTTCTTTATGGCCAACTGTTATAAATTCGATTGTGGTTGGTCTAATGTTAAATGTATTCTTTGGGCTTCCATTAATTCTATCTATGATA…
HS-FS-000016-I-01_80_48	ATGAGAAAAGCTATAGAAATTAAATCAGAAGTTGTTTCTGAGATAGTTGAAAAGTTACAAAAATCTTCTGCTGCTGTTGTTGTAGATTACAAAGGATTAACAGTTGAAGAAGTAACTGAGTTAAGAAAACAAATGAGAGAAGCTGGTGTAGATTACAAAGTATACAAAAATACTTTAGTTAGAAGAGCAGCTAAAGAAGTTGGTATAGAGCAATTTAATGATGAATTATTAGTTGGAACTAATGCCATAGCATTTGGATATGATGATCCAGTTGCTCCAGCTAGAATATTAAAAGGATTCATGGATTCTCATCCAAAAATGAAATTAAAGATGGGTATTGTGGAAGGTGCATTCTATGATGAATCTAAGATTGTTGAAATGGCTAACATACCATCAAGA…
HS-FS-000016-I-01_66_231	ATGAGTTTATATACTGAATGGAGAAATTTAAGTGATAATCATGAAAGTCAAGAAGCAGAAGTAAAATTCTGGGAAGAATATTTGAAAGTTGAAGCTGGAATATACAATGAAATATTAAATAATAAAATGGATGTTGTTGAAGGTAAAGTAAGTGAATTGGCTGAAAAATTTGGAACTACTAATGAATTTTTCATGGGATTCATAGATGGAATAAGTGAAAGCTTAAAAGAAGATATAGTTTTAGAAGAAGTAGAAGCTGATAAAGAAGTTTCTATAAAAATAGATTGGGAAAAATTATATAACAATATGGTAACTGTTGAGGCTCATTGGCTATATAATTTACAAGGTTGGGAAGATATACTACCAGCAGACCAAAGAAAAGAAATAATAAAGGCTTAT…
HS-FS-000016-I-01_71_76	ATGAAGAATTGTATAGCAGTAAGAGGGGCTGGAGATTTAGCAACAGCAGTTATTCATAAATTACACAACAGTGGTTTTAAAGTAGTTGCGTTAGAAATAGAAGAGCCATTAGCTATAAGAAGGCAAATTTCTTTTTGTGAGGCTGTTTATGAAAAAAAAGTAACTGTTGAAGGTGTAGAATGTATATTTTGCAATACTGAAAAAGAAATAGAAGAAGTTTTATCTCAACATAAAGTAGCCTTGATTATAGACCCAAAAGGAGAAAAATTATCTAAGTTAAATCCAATCGTTTTGGTTGATGGAATACTCGCTAAGAAAAACTTAGGTACAACTAAAGATATGGCACCACTTACAATAGCTTTAGGTCCTGGATTTTGTGCAGGAGAAGATGTAGATGTT…
HS-FS-000016-I-01_66_52	ATGGTTAAAGTAGTATATTCACGATATTATGGTATTGTAGTAAAAATAAAAAATTATGGAGAATATAAAATGAACATATTGAGTATTAGAAATATATCAAAAACATATTGCGGAAATATTCCATTTAAAGCATTAGATAAGGTTAGTCTAAATATAGAAAAGGGAGAATTTGTGTCTGTTATGGGACCATCTGGAAGTGGTAAATCTACTCTTTTAAATATAATATCTACAGTTGATAGACAGAGTGAAGGTGAGGTTGTATTAGATGGATATGATGTAAGTAAATTGAAAGGAGAAAAACTTGCTGAATTTAGAAGGAAACAACTTGGTTTTGTATTTCAGGATTTTAATTTGATTGACACTTTAACTGTTGGCGAAAATATTATGTTGCCACTTACA…
HS-FS-000016-I-01_65_113	ATGAAATTTATATCATGGAATGTTAATGGAATAAGAGCTTGTGTTGGGAAAGGATTTTTAGACTTTTTCAAAGAAGTAGATGCAGATATATTTTGTTTACAAGAAACTAAATTGCAAGAAGGGCAAATAGAGTTAGATTTACCAGGATATTTTCAATATTGGAATTATGCTGAGAGAAAGGGTTATTCAGGTACTGCTATATTTACAAAAAAAGAGCCTTTAAAAGTAATGTATGGAATAAATATAGAAGAACATGACAAAGAGGGTAGAGTGATAACTCTAGAGTTTGAAGATTTTTACTTTGTTACAGTATATACGCCAAATTCTCAATCTGAATTAAAGAGACTAGAATATAGAACTAGATGGGAAGACGACTTTATAGATTATTTAACCAAACTA…
HS-FS-000016-I-01_71_138	ATGAAAAGATTTATTTTAATACTACAGTTTTTGACAAGGATACCTATAAAATTAAATGTAGGATTTGATGATGAATTTTATAAGTCAATAGTATATTTTCCACTTGTAGGTTTTGTCATAGGTATATTATCCTATTTAATAGGATGGATTTCTATGCTTTTATTTGAACCATTTATAGCTTCTATAATAATAACTCTAGCTGGTGTCTTAATTACTGGAGGACTTCATATAGATGGATTAGGAGATACATTTGATGCAATATATAGTTATAGGGATAAAGAAAAAATGCTTGAAATAATGAAAGATTCAAGATTAGGTACAAATTCACTTCTAGCAATTATGTTTGTACTTTTATTAAAGGTTGGATTCGTTTACGATATAATAAGTAATAATTCATTG…
HS-FS-000016-I-01_80_16	ATGATTATCTTGAAATCAAAAAAAGAAATAGAACTTTTAAGAGAAGCAGGTAAAATAGTTGCTGACACTCATGAAGTTTTAAGAAAAGCTATTTCTCCGGGAATATCTACTTTAGAATTAGATAAAATAGCTGAAGAGAATATAAGAAAATACAATGCAGAGCCTTCTTTTAAAGGATATGGAGGTTTTCCAGGAAGTATATGTGCTTCTATCAATAGAGAGGTAGTACATGGTATTCCAGGAGAAACTATATTACAAGAAGGTGACATTGTAAGTTTGGATATAGGAGCCTATTATAAAGGATATCATGGTGATTCTGCGAAAACTCACGGAGTAGGCATGATATCTGAAGAAGATAGGAAATTGATAGAAGTAACTAGAGAAAGCTTCTATGAAGGA…
HS-FS-000016-I-01_66_74	ATGACTACATATAAAAAGCTTAAAAAATCTATATTTAAAATTTCTATATTTTCAATATGCTTATTAGTCTCATTAGTAGATATAAACCCTATATTTGCAGGTAGTTCCTCTAATGAGACTTCAAATAGTGATACGATAAAGGTGTTAAATGCTAAGAGTCTCAACTTTAAACAAGGCAATTATGAAGTGAATGTGAGTATTCCTAAAATAAAAGGTTTAAAAGATAAAACTTTAGAGAATAAATTAAACAATGAGTTTTTGCAAGATGGGAAAAAAATTTACAGTGAATTTCAAAATAAAATGAAAAAGGAAAATAATAAGGGTCATAGATACCTAAATGTAATCCATAATGTCAAAAATAATTCTAAGGACTTTTTATCAATAGAAATGACAAAAGAA…
HS-FS-000016-I-01_73_87	ATGAAATTTGAATACTATTACTTAATTCAGGATATTGCAGGTATATTATTGGCATTTATAGGACTTAGAATGTCTATTATTGGATTTAGGATACTTTCTATGAAGGGGATTTCTATAAATACACTTTTAATTGTAATTAAATACTGCTTATTTACCATAGCAGGACTGAATTTATTAATATCTAAGTTTGGAATTAGACACTGGATTTGGAGTGTTTGTATGTTGATAATATCCATAATAATAAATCCCAGGATTAAGGTATCAAAATAG
HS-FS-000016-I-01_63_403	ATGAAATATTCTATAACTGATGTATCAAAAATAACAAAAATTTCTTCATCTGCTATTCGATTTTATGAAGAAAAAGGTTTATTACTTCCTATCAATAGAAAACCAAGTGGTGTTCGCTATTTCTCTGAAGAAGATGTAGAGCGTCTAATATTTATCAAAGAATTAAAAAATACTGGTTTATCTATTAAAGATATCCATGAATGCTTTCATTTTTGTGATATGGGAGATGGTACAATAGATAAAAGAATCCAATTATTTCAACAACATAAGCAAAACATTAAAAATAAAATACATGAACTAGAAAGTTGTATGGATAAAATAGATGAGAAAATATATTACTTAAAAGAAAAAAAGATGTGTAAAAAATAA
HS-FS-000016-I-01_63_680	ATGAATAATAATTATATATTTTTTATTATAATTGGAATGTACATTGTTACATATCTACCAAGAGTGCTTCCTATGTTAATTTTTTCAAAAAAAGAGATGCCTGATTTTTTGAAAAAAATCATGAAATTTATACCTGTAGCAATACTTACTTCCTTAACTGCTAAAGATGTATTTTTTAATGGAGATAGTCTATATTTATCTATAGCTAACCCTAAAATTATATCTTTTATGATTGTACTTCTTGTTGCATATAAGTTTAAATCTATTGGTATTTCTATTATTACAGGAGTGATATCTATATATTTATTTGGAATTATCTTGTGA
HS-FS-000016-I-01_63_669	GTGCTAGAAATTTTAAAAGAAGAAGTATTAAAAGCAAACTTAGAATTACCTAAGAAAAAGCTAATTACTTATACTTGGGGAAATGTAAGTGGGATAGATAGAGAAAAAGGATTAGTGGTGATAAAACCAAGTGGTGTAGAGTATAGTAATATGACTGTAGAAGATATGGTTGTAGTTGATTTAGAGGGAAATGTAGTTGATGGCAAACTAAGACCCTCCTCAGATACTCCGACTCATCTAGTTTTATATAAAGAGTTTGAAGAATTGGGGGGAATAGTACATACACATTCAAGTTGGGCAACAATTTGGGCTCAAATAGGAAAATCTATACCATCTTGTGGTACTACTCATGCAGATTATTTTTATGGAAGCATACCATGTACCAGAAAAATGACTAGA…
HS-FS-000016-I-01_85_20	TTGAGTAAAATATTGATTATTGATGATGAAATGGACCTAGTAATGCTACTTGAGGATGAATTGAAGGCAAAAGGACATGAAGTGTTGATAGCTTATGATGGTCAGGCAGGTATAGAGTTATCAAAACAGGAGCCTGACCTTATTATACTGGATATTATGATGCCTAAAATGAATGGATTTGAGGTATGTCAGGCAATTAGAGATGATGTTTTATGCCCAATTATATTTTTAAGTGCAAAGCAATCAGAAACCGACAAAATCAAAGGGTTGACCTTTGGAGGGGATGATTATGTAACAAAGCCATTTGGACTGCGTGAACTTATGGCAAGGATTGAAGCTAATCTGCGTAGGGAAAAGCGTTCACAGTATATCAATGAAGAGAACAAGAGATCTACTTTG…
HS-FS-000016-I-01_66_66	ATGATAATATTTCCAGCAATAGATATAAAAGATAATAAGTGTGTAAGACTCACACAAGGAGAATTTGACAAAGTAAATGTATATTATGATAATCCATTAGAAGTAGCATATAAATGGAAAAATGAAGGAGCAGAATATATACATATAGTAGATTTAAATGGTGCTAGAAGTGAATTTGGTATAAATACAAAAATAATTGAGGATATAGCAAACAATATAGATATACCTATTCAAGTTGGTGGTGGAGTTAGAGATAAGGGAAAAGTCAAAAGTTTAATAAATGCTGGTGTTACTAGAGTAATATTAGGTAGTATAGCGATTGAAAATTTGAATTTGGTTGAAGAATTGGTCAATGAATATAAAGAGAAAATTGTAGTTTCTATAGACGCTAAAGATGGA…
HS-FS-000016-I-01_87_21	ATGGATGCTAAAATTAATGATTGGGTTATTATACACAATATAGTATTGACTCCAGAAGAAAGAGCTCCACAAGTTCCAGAGGATACTAAGAAAGTATCCTTAGAAATGTGGGTTAAAGGTTTTATACAAAGTGATGCTTCTATAGGCGACTTAGTAGAAGTTAAAACAATTACAGGTAGACTTGTAAAAGGTAATTTACTTAAAGTAAATCCATATTATACTCATGATTATGGTAAATGTATACCAGAGTTACTCCAAATAGGAATCCAAGCTAAAGAAATATTATTTGGAGGTGTATATAATGAATAA
HS-FS-000016-I-01_63_536	ATGTCAGTAATATCAATGAAACAATTATTAGAAGCAGGTGTTCACTTTGGTCACCAAACAAGAAGATGGAACCCTAAAATGGCTAAGTATATATTCACAGAGAGAAATGGAATATATATAATCGACTTACAAAAAACAGTTAAAAAAGTTGAAGAAGCTTACAAGTTCACTAAAGAAGTAGCTGAAACAGGAAAGCCAATCTTATTCGTAGGAACTAAAAAACAAGCTCAAGATGCGATAAAAGATGAAGCTGAAAGATGTGGAATGTACTTTGTTAATGAAAGATGGTTAGGTGGAATGTTAACAAACCACAAAACTATAAAAACAAGAATAAATAAATTAAGAGAATTAGAAAAAATGGAAGAAGAAGGCGTATTTAATGTTCTTCCTAAAAAAGAA…
HS-FS-000016-I-01_67_33	ATGAAACCAGAAAAAACTCGTCAAGGTATAATTAAAGCATTTAATGCAGCTATAGAAGGGATATTGTATACATTTAAATTTGAAAGAAATATGAAAATACATTATTTAGGTTCAGTTGCTGTTCTTATAATAAGTTTGTTTTTTAACTTTTCAAAATTAGAAATGATAATGTTACTTATGTCCATATGCTTAGTTGTAGTTGCCGAAATGTTTAATACAGCTATAGAAAAAGCTGTTGATTTAGTAACTGATGAATATCATGTTCTTGCTAAGATAGCAAAAGATGTTGCAGCTGGAGGCGTTCTAGTGGCAGCACTAAATTCAGTAGTAGTTGGATATATTTTGTTTTATGATAAATTGACAGATATATCTGGAATATTAATTTATAAAATAAGAGAA…
HS-FS-000016-I-01_71_99	GTGATTTCAAAGAAGAAAGCTATTTTTTTAGGGGTGATTTTAGTAATTATAACAGCTATGGTTACATCAGCATTTCAGTTGACATTGGGGAATAAAGTTGTAATATCGAAAGAACTCTATGAAGACTATAAAAAATATGATAAGTTGTTAGGACTAGAATCTATTATAAAACAAGATTTTTATAAAAAAGTATCAGATACTGATTTGGTAAATGGAGCAGCAAAAGGTCTATTTCTAGGAACAAATGATAAGTATTCTGGTTATTATACTAAAGATGAAATGGAGAATCTAATTAATGATAGTGAAGGTTCTTATGTTGGTGTAGGTATGTATATAGGGGCATCAAAAGATGGTGGCTTAGTAGTAGTTCCCATGAAAGATTCTCCAGCAGAGAAAGCA…
HS-FS-000016-I-01_68_38	ATGATTTTTATAAAAAATGGTAAAATAAATACCATAACAAATGGGATAATTCATGGAGATATACTTATAGATGAAGGAAAAATAATAGAAATTGGAGAAGATTTGATAGCTCCTTTAGATGTAGAGGTAATAGATGCTAGTAATAAACTTGTGTTTCCTGGATTTATAGATGCTCATACTCACTTAGGTTTATGGGAAGATGGTATAGGGTTTGAAGGAGCAGATGGAAATGAAGAGACTGACCCAATAACACCACAATTAAATCCTATAGATGGAATTAATCCAATGGATAGAACTTTTAAAGAAGCTTTTGAAGGTGGAATAACTTCTGTTTGTACAACCCCTGGAAGTGCAAATGTTATGGGTGGTCAATGTATAGCTATAAAGACATGTGGAAAA…
HS-FS-000016-I-01_63_537	TTGAAAAATGCACTAAAAAAAATTATATCATTAGCCATGATTCTAGTTTTTATAATACCAAATTATTCATATGCAGATGGTAAATCTGTAGACAAGTATTCAAAAACATCTATACTTATAGACCAAGAAACAGGTAGAGTTTTATATAGTAAAGAACCTGATATGAAGGTACCATTAGCTAGTTTAAGTAAGATGATGACTTTTTTACTTGCAATAGAAGCTATTGAAAATAAAGAAGTAAAAGAAACTGATAAGGTAAAAATAGACAAATCTATTGCATCAGTAAAAGGGTCAAGTTATAAACTTAAAGATGGTGAAGAAGTGCCACTTATAGAGCTTATGAGAGGTCTTATGATTGTATCAGGAAATGATGCGGCAATTGCTATAGCAAAACATATT…
HS-FS-000016-I-01_79_42	ATGGCAACGATTAAACCATTTAAGGCGATTAGACCAAATAAATATATAGTAGATAAAGTAGCAGCACTTCCTTACGATGTTATGAATAGTAAAGAAGCTAGAAGAATTGCAGAAGGGAATCCATATTCATTTTTGCATATAGATAAATCAGAAATTGATTTAGATGAAAATATAGATTTATATGATGAAAAAGTTTATTTAAAAGCGCGAGAAAATTTATATGAGTTTCGAAAACAAGAAATTCTAGTAAAAGATGACAAAGAGTGTATATATATATATAAACAAATCATGGATGGTAGAGCTCAAGTTGGTATAGTAGCATGTATATCAGTTGATGAAAGCTTGAATGGAACAATAAAAAAACATGAGTACACTCGACCAGAAAAGGAAATTGATAGA…
HS-FS-000016-I-01_74_92	ATGTCAAATAATATGAGACTAGAAAGATTGAGAAAGTACATGAATGAAAAAAGCATTGAAATTGCTTTAATATTTGAACCAGACAATCAATTTTATATTAGTGGATTTAAAGCAATAACTTATTCTAGACCAATTGTAACAGTAGTAACTCAAGATAAAATAGAATTAATAGTACCTGGATTAGAAGAATTACATGCTAAAGAAGTTGCAAAAGTTGATAATGTATATGTGTATTATGAAATACCAGAAATGAAAGAACATGGAATATCACATAAACATTACTTAGATATAATTTTAAATAAATACCCTAAAGGAACAACTGTTGGAATAGAAAAAGATATAGTATCTGCAAGTTTTTCAGAGTATATAACTGATAAGTCATTTGCTATCAAAGATGTT…
HS-FS-000016-I-01_84_53	ATGTCTGAAAAAAAAGAAGCTAGAGTAGTAATTAATGATTTATTAGCTGAACAATATGCAAATGCATTTAAAGCTAAAGAAGAAGGAAGACCTGTAGGTTGGTCAACATCAGTATTTCCTCAAGAGTTAGCAGAAGTATTTGACTTAAACGTATTATATCCAGAAAACCAAGCAGCTGGAGTAGCAGCTAAAAAAGGTTCTTTAGAATTATGTGAAATAGCTGAATCTAAAGGATATTCTATTGACCTATGTGCATATGCAAGAACAAATTTTGGTCTTTTAGAAAATGGTGGATGTGAAGCTTTGGATATGCCAGCTCCAGATTTCCTACTTTGCTGTAACAATATATGTAATCAAGTTATAAAATGGTATGAAAATATTTCAAGAGAATTAGATATA…
HS-FS-000016-I-01_76_14	GTGAAGAAAGCTATAGCAGCTTTAGGAATTGGGGCAGTAGCAGTATCTGTTAGCTCCATAAATGCAAGTGCTCTTGAAAAGGGAACAGTAACAGCAAGTGCCTTGAATATAAGAAGTGGACCAAGTTCTGATTGTGATAAGGTAGCAAAATTATACAAGGGAAAAACTGTAGAGATTTTAGAAAAGTCTAATGGATGGTATAAAGTAAGGGTATCGAGTTCTGTTGTTGGATGGGGAAGCGCAAAATACATATCAACAAGTGGTTCATCTGAAGGTACATCAAATCAAAATAATCCAACTTCAAGTGGGACAACTATTAGTGGAAATGGTAAAGTAAATGTGAGTTCTAGACTGAATGTAAGAAGTGGTGCAGGTACTAACTATTCATTAGTTGGTAAA…
HS-FS-000016-I-01_63_254	ATGAGTAAAGTTATAGTAGTTGGTGGAGGAGCTTCTGGAATGATGGCAGCTTTGTCAGCTTCAAAAAACAATAATGAAGTAATATTAGTTGAGAGAAATGGAGAATTAGGAAGAAAACTTAGGGCAACTGGTGGCGGTAGATGCAATTTTACCAATAATAGAGAGATAGAAGATTTTTTTGATAAAGTTGTCAGTAATAAAAAATTTCTCTATAGTAGTTTCTATACATTTACAAATAAAGACCTTATTTCGTATTTTGAAAGTAGAAATTTGGAATATAAGATTGAAAAAGAAAATGACCACAAAGTATACACTAAAAATGATAAATCTATAGAAGTAATAGAAGTATTAAATAAAGATTTACTCAATCACAATGTAAAGATAATGTATAATAAGAAA…
HS-FS-000016-I-01_67_61	ATGATTAATATAGAAATTCCTAAAAAAGTAGACTATATAATTAAAGAATTAGAAACGAATGGTTATGAAGCTTATGTAGTTGGAGGATGCGTTAGAGATTGTTTATTAGAAAGAGTTCCAAACGATTGGGATATAACAACTAGTGCTAGACCAGAAGTGGTAGTAGAATTATTTGAAAAAACAATTCCAACTGGTATACAACATGGGACTGTAACAGTTATGATTGAACATGAACCATTTGAAGTGACAACTTATAGAATTGATGGAAATTATAGTGATGGTAGACATCCAGATTCAATAGAATTTACAAATAACATAGTTAAGGACTTGTCAAGAAGAGATTTTACTATCAATTCAATTGCATACAATTCAAAGACAGGATTAGTCGACCCATTTAAT…
HS-FS-000016-I-01_67_53	ATGGGTAAAACAAATGCTAGAAGAACGCTTTTTTTGATAGCAATAGGTTCAGGAACTATGCTGAATCCTCTTAATTCTTCTATGATTTCACTTGCTTTACATAGTATACAAAATGATTTTCATATTAGTTTTACAACTGTATCTTGGATTGTTTCAGCATTTTACCTAGCTAGTGCTATTGCACAACCAGTTTCAGGTAAGATAGGAGATTTAATAGGTAGAAAGGTCTTATTTTTGAGTGGTTTGATGCTTGTAATTTTATCAGCATCCATAGTACCACTTGTTCAATCATTCTTTATATTGATTTTTATAAGAGTAATTCAAGCAATTGGAACAAGTACCCTATATCCATCTGGAGTTGCTCTTATACAAAATAATATAAAAGAAAGACAATCTTCT…
HS-FS-000016-I-01_66_40	ATGAGTTTATTAAAAAATTCTTTGGCCAATTTAAAAGGTCACAAGCTTCGTGTATTTGTAGCTTTACTCTGGATTATAATAGGAATAACTTCAGTAATACTTGTTAGTTCTATAGGTAATGGATTTCAAAAAGAAATTAAGAAATCTGTAAACAATGTAAACCCTAATAAAACTACTATTTCGTTTGAATCAGCCGATAACACAGGTCTTACTGATGATATGAGTATTTTTTTAAAACCCTTTAATGCAAAAGATTTAGAAGAATTATCATTTGTTGAAGGAGTAGAAAGAATAGCTCCTTCAAGAGATGGGTTTAACCTTGATTCAGTTTACTCTTCACAAGCATCTTTTGATAAAAAAACTACGTATGTTGATGTTGGACCAGTAAAAAAAGATTCT…
HS-FS-000016-I-01_74_96	ATGAAAAAGTATGAGATATTTATTTTTATGAGTATAATAGTTTTGTGTTTTATAAGTTTTCCACATAAAGTTTTTGGACAAGAGGAAAATTGTCTTGAAGATTTTGAAAGGTGGGTTCAAGAAAATAAAAATAATAAAGAAGAAATAGTTTATACTCTTTCTTGTAATATGGTAATAGATGAAGAGTTTAGATTTTATATTCCTTATGACAGTAATTTTACAATAGATACCAACAAATATAAAATATTGATAAAAAATCATGGGAGATTTATTATTGATGATAATGAATTGAATATAATAGGTGAAGGAGGAAAAGAAGGAGTAATACATATAGAAAATGGTGGAAGTATAAGTATTGGTATAAACAACATAATTGCTACTGATGGGACAGCCTTATAC…
HS-FS-000016-I-01_66_150	TTGGACAGTAATAGAAAACCTAATAATCTAATAAATGAAAAATCTCCATATCTTTTACAGCATGCTTATAATCCTATAAACTGGTATAGTTGGAATGATGAGGCTTTTAAAAAAGCAAAAGAAGAGGATAAACCAATATTTTTAAGTGTAGGATATTCAACATGTCATTGGTGTCATGTTATGGAAAAAGAATCTTTTGAAGATGAAGAAGTTGCTGAAATAATGAATAGAAACTTTGTGGCAATAAAAGTAGATAAAGAGGAAAGACCTGATGTAGATAGCGTGTATATGACAGTTTGCCAAGCTATGACAGGTAGTGGTGGATGGCCAATGACCATAATAATGACACCAGATAAAAAACCTTTTTTTGCGGGAACATATTTCCCAAAATATTCAAGG…
HS-FS-000016-I-01_81_67	ATGGAATATTTATTTGAAAAAAGTAGTTTAAAAGAATATGGAAATGAAGCTTTAGATAAATATAGAGAATTATTAGATAAAACTGATAATAATTCAAGGTGTATTCTTTTATTAGTACCAAACAATAACACAAAGATACGATATGAAAGGGCTCTAAGATTAAATTATAGTGAAGAACTGAAAATAACAACATATATAAGTTTTGTGAAGAAAGAATTAGTTAAATACTGGCCACTAATAATAGAAAAATGTGATGAAATAAATACAAAGGTTGTATCTCCAACATTTATATCAAATAGTTTAAGTGAATATTTAATAGTGCAAAAAGTTAAGGAAAAAAGGATACAAGAAGGATATTTTGAAGATATTACAGGAACCAATAAATCCATAGCAAATAGT…
HS-FS-000016-I-01_63_246	ATGTACTCAAATGAAGACTATAAATTTATAGAAGAAAATGCACCATGTTATATATATGATGAGACTAATATAATTGAAAAATGTAAGGAATTGAAAAATAATATTTTAGGTTTTGATTTTTTATATTCTATAAAAACAAATCCATATAACAAAATTGTAAAAAGCATTGCAGAGCAAGGTTTTGGAGCAGATGCTTCTTCAACTAATGAAGTTATGATTTCATCAGAATGTGGAGTTTCTAAATATGATATTTATTATTCATCACCAGGCAAAACAGAGATTGATATAGAAACTGTTTTAGATAAATGCATAATTATTGCAGATAGTATTACAGAAATAGAACTTATAAATAAGATATCTAAAAAGCATAATCAGAAAGTTAAAATAGGAATAAGAATA…
HS-FS-000016-I-01_85_7	ATGGAAAAGAAATGGTGGCAAAAAGAAATCGTTTATCAAATTTATCCAAGAAGCTTTCAAGATAGTAATAATGATGGAATTGGAGATTTACAGGGAATTATTTCTCGTTTAGATTATTTAAAAGATTTAGGTATTACATCATTGTGGTTATGTCCAATTTTTAAATCACCTATGGACGATAATGGGTATGATATTAGTGATTATTTAGATATTGCAAGTGAATTTGGAAGTATGGAAGATTTAAAAGAGTTAATTAAAGAAAGTAAAGATAGAGGAATCAAAATTATATTAGATTTAGTTCTTAATCATACAAGTGATGAACATCCTTGGTTTCAAGAAGCATTAAAAAATCCAGAAAGTCCTTATCATGATTATTATATTTTTAAAAAAGGAAACGAT…
HS-FS-000016-I-01_73_4	ATGAAATTAATTTTAAGTTATTTAAAGAATTATAAGTTATTAATAGTATTAAACATACTGGCTATATTTAGTTTTGCATTAGTCGAGTTGGGGATTCCAACTATAATAGCTAAAATAATTGACAATGGTATTGCAAATCAGAATATAGCTTACATAAAACAAATGGGAATAGTGATTGTTATTATTTCTATTATAGGGGTTGTAGGTAGTATATTGTTGGGTTATTGTTCTGCTAAGGTATCAACAAGTGTAACCAGAGATATAAGAAATGACATATTTGAGAAATCACAAGAATTTTCACATACTGAATACAATAAATTTGGAATTTCTTCAATGATTACAAGAACAACGAATGATGCATTTCAAATTCAACAATTTGTTAATATACTACTAAGGACT…
HS-FS-000016-I-01_65_68	ATGAAAAGAGAAGATATAAAGTATATTATAGAATCTGTTATGTTTGCATATGGGGAACCAATAAGTATAAAAGAATTAAACTATATAATAAATAAAGAACTTTCATCAAAAGAAATAGAGATTATGTTAAATTTACTTATTGAGGAGTACAGAGAACAAAATAGAGGTATTCAAATAATCAAGCTAGAGAATAAGTACCAAATGTGTACAAATAAAGACTATGCAGAATATATAAAGAAGATTATTGAACCAAAGAAAAAGAAAAGTTTGAGCCAAGCTACATTAGAAACTCTTACTATAATTGCCTACAAACAACCAATAACAAAGGTAGAAATAGAGGATATAAGAGGAGTAAAATGTGATAAGGTATTACAAACTTTGTTTGAAAATGAACTTATA…
HS-FS-000016-I-01_81_27	ATGAAAAAGATAATATTAGCATCTCATGGAGATTTTTCAAAAGGGCTTTTAAATGCAGTAAAAATGATAGTAGGAGATTTAGCAGATTGTGTTAGTTCGTATGGTTTGTACCCTGGACAAAGTGCTTCAGATTTTGCTTTAGAATTAGAAAAAACAATATCAGAAGATATAGAATGTGAATATATAATTTTATCTGACTTATATGGAGCAAGTGTATGTACAGCAATGTTAAGATTAACTAATCTACATAATGTTAAGTTATTTTCTGGAATGAATTTGAATATGGTATTAGAACTTCTTACAAGGTTTTCTGATGAATTAACAGTTGAAGATATAGAACAATTAGTGGAAGAATCTAGAAGAGGAATACAAAGCGTGACATTACAAATTAAAGAAGAA…
HS-FS-000016-I-01_64_221	TTGATTAAAATAACAATTCCAGGTAGACCTATTAGTAAATCTAATTTTAAGCTTCATAACATAAATGGTCAAGCATGGATGCCTTCAAAGGGAAAATATTCTAAGTATCTTGCATACGAAAACATGATTGCAGGTTTTATAAACCAACAGTATCAAGGGGAAACTGTTGAAGAAAATCTAATAACAGTCTTGAAATTATTCTTTCCAAATAAGAGAATGGGGGATTTACATAATTATCCAAAAAGTATTTGTGATGGTATTGAAAAAAGTGGAATAATAAAAAATGATAAACAACTTAAGCCAGTATTTTTATTTGATTTTATAGATAAAGATAACCCTAGGGTTGAAATTGAACTTTATCCAGTATCTAAATACGATATATCCTATAATATTTTTGAA…
HS-FS-000016-I-01_80_50	ATGGCTAAAAAAGTTATAGGTCAAATAAAATTACAAATACCTGCAGGAAAGGCTACTCCAGCGCCACCAGTTGGACCAGCATTAGGACAACATGGTGTTAATATAATGGGATTCACAAAAGAATTTAATGCTAAAACTGCAGATCAAGCTGGAATGATAATACCAGTTGTTATAACTGTATATCAAGATAGATCATTCAGTTTTATAACAAAAACTCCACCAGCTGCAGTTTTAATTAAAAAAGCATTAAACTTAAAATCAGGTTCTGGAGAACCAAACAAAAAGAAAGTTGCTAAAATGACTTCAGCTCAAGTAAGAGAAATAGCTGAGTTAAAAATGCCTGACTTAAATGCTGCATCAGTAGAAGCTGCTATGAGTATGATAGCTGGTACTGCTAGA…
HS-FS-000016-I-01_84_40	ATGCAAAGTTTAAATGAAATAATCGCTGAAAATTTAAAAAAGATAAGGAAAGAAAAACATCTTAGTTTAGACAAGATTGCACAACTTAGTGGTGTAAGTAAGAGTATGCTATCTCAAATTGAAAAGTGTGAGGTAAATCCTACTATATCTACTTTGAAGAAAATAACTAATGGACTAAAAATCTCATTTACATCATTGATGGAGAGGCAGGAAAGTGACATAGAATTGATTCAAAAAAGTGATATAGACCATTTTATTGAAGATAATGGAAAGTATATAAGTTATCCAATATTTCCATTTGACTCCAAAAGAAGATTTGAGATATTTATGATTGAAATAGAAGAAGGTGGAAATTTAGATTCAAATGCTGAACTTCCAGGAACACAAGAGTTTATAACT…
HS-FS-000016-I-01_67_19	ATGTTGAATGAAATTATATGTGCTGGTTTTGGAGGACAGGGAGTTCTTACAGCAGGAAAAATTATAATGTATGTTGCATATAAGGCAGAAAAGAAAATTACATGGTTCCCATCTTATGGAAATGAGATGAGGGGAGGAAGTGCAAATTGCAATGTTGTTGTAAGTGATGAAAAAATTGCAAATCCTTGTGTAAAAAATCCAGATATACTATTGGGAATGAACAGCGTATCAGTAGATAAGTATGAAAGTTTAATGAAAAAAAATGGTTATATGTTTGTCAATGAATCACTAGTAAGTAAGGATAGAAAGTACAGAGAAGACATTAATGTTATAAAAGTACCTGTTACTGAAATAGCACAAAATTTAGGCAATGAAAAAGCTGCTAACATTTGCATGTTA…
HS-FS-000016-I-01_63_657	ATGAATAAACTTTTAAAGCCAATAACTATACTATTGTATATAGTTTATATTTTATCTGCCGTATTTTTTGTAGCAAACAAAGAATATGGAAGTCTAGGTCTAGTAGCAATTAGTTTAGTTGGTACTTTCATTTTGAGTTTTATAAATAAGCAAACTGAAAGATTATTGAGTAAAGAATTATATATAATGCTTGCTTTATTTATAATGTTTTCATCATTGTTAGGTACTTGTTTTAATTTTTATGATATAAATTATTATGATGATTTTTTGCATTTATGGTCAGGTATAATATCTTGTATTGTGGCTTTTTCTATAATTAAATACTTTTATACACAAAGAGAGATAAGTAAAATGAGTAAAGTGTTTTTAGTTATATTTTTATTTATGTTTAGTATGGGA…
HS-FS-000016-I-01_76_57	ATGAAAAAGAAAAGTAAAGCCCAAAGACAAAAAGAGCTTATAGATATGCTAAAGACAGATCCTTTTTATACTGATGAAGAATTATCAAGTCTGTTTGATGTAAGTATACAGACCATAAGATTAGATAGAATGAGTCTAAACATACCAGAGCTAAGAGAAAGAGTCAAATCAATAGCAGAAACTCAGAGTTCAAAAGTAAAGACTTTAGGAGTAAAGGAAATTACAGGAGAAATCATTGATTTATCTGTAGGGCGATTAGGTATATCTATGTTAGAAGTTACACAGGACATGATTTACTCTAAGACTAATACTTTAAAAGATACGTATATTTTTTCTCTAGCAGATTCATTGGCAATGGCTATAATAGATGCACCTAAGGTTATTATGAGAGTTGCAAAT…
HS-FS-000016-I-01_75_43	ATGATTGGATTTCTAAAGAAAAGAAGAAGTATTAGAAAATACAAGGATGTTGAAGTAGAAAAAGAAAAATTAGATAAAATATTAAAAGCTGCTCTTTTAGCTCCATCATCAAAGGGGCTTAGAACATGGGAATTTATAGTGGTAGATGATAAAGAAAAGCTAATTAATTTATCTCAATGTAGAACTAAGGGTGGTGGATTTTTCTTAAAAAATGCACCTTTAGCTATTGTAATTATTGCAGATAAAGAAAAAAATGATGTTTGGATAGAGGATGCAAGTATAGCTGCTTCATACATACAACTTCAAGCTCATGAACTAGGTTTAGGTTCTTGTTGGATACAAGTAAGAAATAGAATGTATGATGATAATATAGAAGCTGATAAGTACATTAGAGAAGAA…
HS-FS-000016-I-01_63_4	GTGAAATTTGAACGGTTAAGAACCAGTGAAAATAAATTATATTACAAGGCTATGGAATTATATAAAATTAGTTTCCCATTTCATGAACAAAGAAAATCTTATTTGCAAACAGAAATTTTGAAAAATAAAGAATATCAATTCAATTTAATTTATGATAAAAACCAGTTTGTCGGCATAATTTTATGTTGGGAAACAGATAACTTTATCTATGTAGAACATTTCTGCATTTTTCCAGAAATGCGCAATAATAGATATGGACAAAGAGCGTTAGAGCTTTTAAATAAGAAAGGAAAAACTATTATTTTAGAAATTGACCTTCCAATTGATGAGATTTCAATTTATCGCAAGGCGTTCTATGAAAGAGTAAAATATAAGACAAATAATTATGAACACATTCAT…
HS-FS-000016-I-01_76_55	ATGAAAGTTAGCATAGAAAAAATAAATAGAAAAGAAACTGACAAAATAGACTTGAATTTTTGTGAAAAAATTGATACTATTAGTTATTGTGATGAGATTTACAAATTAGTATCACCTGTAAATTTAAAAGGGAAAGTGTCAAAGACTAATAAAGGTTTGTATCTAGATATAGATGTCAATTTTACAATTGTTGACAATTGTTCAAGATGTCTTAAAGAAGTAGAAATACCACTAGAGTATTCTATACAAGGTTTTTTAGTAAAAGAAGAAGATTATGATGAAGATGAGTTTGAGGAATTTGATCCTTTTATATTCGATGGTGAAGAAATCGACCTTATTGATATAATAGAACAGACATTAGATTTTAATGTACCTCATAAAGTTCTTTGTAGTGAAAAC…
HS-FS-000016-I-01_67_107	ATGAAACATGAAGTAATACATACTAATGATGCACCAGCAGCTTTAGGACCATATTCTCAAGCTATAAAAGCTGGAAACTTATTATTTGTATCTGGACAAGTTCCTCTTGTACCAGAGACTATGGAAGTAGTTGAAGGAGATGTACAAGCTCAAACTGCTCAATCTTTAAAAAATCTTAAAGCTATATTAGCTGAAAGTGGAGCTGATTTTTCAAATGTAGTTAAGACTACAGTATTTATAAAAGATATGAATGAATTTGGGGCTATAAACGAAGTTTATGCTGAATATTTTGGAGAAAATAAACCAGCAAGAGCTTGTGTAGAAGTTGCTAGATTACCAAAAGACGTTAAAGTTGAAATAGAAGTAATAGCTGTATTATAA
HS-FS-000016-I-01_67_187	TTGCTATATATATTAATAATAATTCTACTCATAGGCTTAGACCAACTGTCTAAAATATGGGTATTGAATAATTTGGTAGATGTTTCAACAATACCAATAATAAATAATGTATTTCATTTAACTTATGTCGAAAATAGAGGTGCAGCATTTGGATTATTACAAAATAATCAGTGGATATTTATAATTGTTGCATTACTTGCAACAGTATTTGGATTATACTATCTTAATACAAGGAAAGTACATATATTTGGAAGGTTGGGAATTATATTAATTATATCTGGTGCATTAGGAAATCTAATTGATAGAGTACGATTAGGTTTTGTGGTAGATTACTTCGACTTTAGAGTTATATGGGAATATGTATTCAATGTAGCTGATGTATTTGTAGTTGTAGGAACT…
HS-FS-000016-I-01_68_149	ATGGAATTGGATAAAAATTTTAAGTTTAGATTACAGAAAGTTTTAGACTTAAAAATAAAAGATGAAGAAGAGATAAAAATGGAATTTGCTAAGATTCAACAAAAAAAAATAGATATAGAGAGCAATTTAGAAAACTTAGAAAGTAATTACAGCAAATATTCTATAAGTAAAAATAATGATAGTGTTCAAAATCAAAAAATAACTATTAACTATTTGTTAGCTTTAAACAACTCTATAATGGATTTATCAGAAGAGCTGGATAAGTCGACAAATGAACTTGAAAAAGCTAGAAAGCAGCTTATAAGCAAACAGATAGAGAGAAAGTCATTAGAAAAATTAAAAGAAAAAAAATATGGACAGTATTATAAAGAAGAACAGTTAAAAGAACAAAGCACTAAT…
HS-FS-000016-I-01_65_50	ATGAAGTTGTCTACTAAAGGTAGATATGGACTAAAAGCAATGTTTGAATTAGCATTAAATCAAGACAATGGACCAGTATCATTAAAATTTATTGCTAAGAAGCAAAAAATATCAGATCAGTACTTAGAACAAATATTTTCATCTTTAAAAAAATCGGGTCTAGTAAAAAGTGTGAGAGGTGCTCAAGGAGGTTATTTGCTTTCAAAGAATGCTGAAGACATAACAGTAGGAGATATACTTGTAGTATTAGAAGGACCAGTTGCATTATCTGACTGTGTACTAGATGAAGATGTATGTGAAAACTCAAACATGTGTGTAACAAAAATAGTTTGGGAAAAGATGAAAAAGGGTATAGAAGATGTTATAGATTCAATTACTCTTAAAGATATGATAAATGAC…
HS-FS-000016-I-01_77_47	ATGCTTAAAAAGATAGTTATAATATCCTGTATAGTAGTTGTGTTAATCATTTTATCAAAAATAGTTGATGATAACATCAAAGAAGATGCTTCTATTCCAAATGTGAATAAAGAAACATTAGAATATTTTAGAAAAAATTATAAAGAAGACATAATAACTTGTGCTGAAGAAGATTTAAATAATGATGGGAAAAAAGATTTAGTAGTTATATATAAAAAAAGCAATAATTCAAATGAAATGGTAGTCGTAGTTTCTGATAAAAATAGCCACTATATAACAAAGCCAATACCAGCACCTATAGAGAATCAAACTATAACCTTTAAAAATATTGATGATAAAGCACCAATAGAAGTAATAGTATCAGGGTCTAAAAATGGTAATGTAGGATATGCTATTTAC…
HS-FS-000016-I-01_64_243	ATGGCTAAAGATGAAATTATTAAACAAGTATTAACATTTTATGTAAATGATGTTATTTATGGAATAGAATTAGAAAATGTGATTGAAACCATAAGATTTCAATCAATAACGTATGTACCATGTCTTCCAACATATATAAGTGGAGTTATTAATTTGAGAGGAAGAATAATACCAGTTATTAATATGCATATAAAGTACAATCTTCCTAAAGCTGATTATAATGAGAGAACTTGTATAATAATTACAAAGGTTGATGAGTATCAAGTTGGAATTATTGTAGATAAAGTTGTTGATGTTATTCATATAGAAAATCTAAATTTACTAGAGACGACTAATTCTAACAACACTAATATTAATAAAGATATAAAAGAGATTGCGAAAGTTGAAGATAATTCTATA…
HS-FS-000016-I-01_63_272	ATGGGAAGTCTAAAAATATATCCAAGTAAATTATCTGGAGATGTAAAAATACCACCATCAAAAAGTATGGCACATAGGGCAGTTATTTGTTCATCTCTAAGCAATGGAAAAAGTAGAATTTCTAATATAGATTTTTCTGATGATATAATAGCTACTATAAGAGCAATGACATCATTAGGAGCTATTATAGAAAAGAAAGAAGATATTTTAGAAATTTCGGGAATTTTTTCTAAAGAAGGTATTTTAAATAGAGAGAATCAGTTGAATCAACCTAAATTGACAATAGATTGTAATGAATCAGGCTCTACATTAAGATTTTTAGTACCTATATCTTTAGCATTTGATGGTGTAAAAAGGTTTATAGGTAGAGGTAATCTTGGAAAAAGACCACTTGATACT…
HS-FS-000016-I-01_76_86	ATGGATTTTTTTTCGGAGATTTTTAACAATGGGGCTTTGGGAATAAGTCTGATTGCTTGTTTCTTAGCACAATTTATAAAAATATTTACTGGTAAGGAAAAAAGAATTGAGTTATCAAGAATACTTATTTCAGGAGGTATGCCTAGTTCCCATAGTTCTTTTGTTACAAGTTTAGCTACAGTGGTAGGTATTGAAAAAGGGTTTAATTCTACTGATTTTGCTATAATTACCGTACTTGCCTTAATTATAATGTATGATGCAGCAGGTGTTAGACGAGCTGTTGGTAAACAAGCTACTATATTAAATCAAATGGTGGCAGATATACAGCATGGAAAGCATATAGAGCAGAAGAAATTAAAAGAATTAATAGGTCATACACCACTAGAAGTTTGGTTTGGA…
HS-FS-000016-I-01_63_418	TTGAATATAGTTATTAGTAATTCGAGTGGGAAGCCAATATATGAACAGATTACTACACAAATTAAAAGTATGATTATAAGCGGAGAGTTACCAGAAGGCTCAGCTCTTCCAAGTATGAGACTATTGGCAAAGGAACTTAGAATAAGTGTAATTACTACAAAACGAGCATATAGCGATTTAGAACGAGACGGATTTATTGAGACAGTTACTGGTAAAGGCAGTTTTGTATCTAGTAAAAACATGGATTTTGTCAAAGAAGAACAATTTCGTTTAATTGAAGAATACCTACAAAAAGCAGTTGATACAGCAAAAAGTAGTGATATTACATATGACGAATTAAAAGATATTTTATTTTTATTATATAAAGGAGAATGA
HS-FS-000016-I-01_64_40	ATGAAATTATTACCAGAATTAAAATACTCTAAAGATCATGAGTGGGTAAAAGTAATTGATGGAGATGTTGTATATATAGGTATAACAGACTATGCTCAAGATCAATTAGGAGAAATATTGTTTGTTGAAACACCAGAAGTAGAAGATACTGTAACTAAGGGAGTAGATTTTGGAGTAGTTGAGTCTTCTAAAGTAGCTTCTGATTTAATATCTCCTGTTAATGGTGAGGTATTGGAAGTTAATGAAAAATTAGAAGATGAGCCAGAATGTATAAATGAAGACCCATATGAAAACTGGATATTAAAAGTAAAACTAGCTGATGTGGCTGAACTTGATACGTTATTAAGTGATAAAGAATACGAGGCTGGATTAGAATAA
HS-FS-000016-I-01_87_19	ATGAAAAAAAGAGAGGATGATTTTGAAGTTAGAAGAAAACATCTTCAAGAACTGAGTGATGATGAGTTAAAAGAAAGGTTTTGGAATTTAGCTACCCAGATAGTAGAACCAATGATAGAACTTGGTAAAAAGAATACAACACCATCAATAGAAAGGTCTGTCTTGTTGAGAATGGGATTTTCTTCTCTTGAAGTAAAACCTATTTTAGAAGGGGTTATGGAAAGAGGTCTTATAGGTAAAGGAGCAGGGCATGTAGTTTATAAATTGGCTAAATCTAAAAATATAACGGTTAGAGAAGCAGGTTTGTTATTAGTTAAGGGTGAATATTGGGATGAAGTTACATGTTTATTTAGAGAAGGGGTAGAATCATGTTAA
HS-FS-000016-I-01_81_36	ATGAAAAAATTAGATACAGAGTCATTAGAAAAAATGGCTAAACAAAAAAATATTGACAAGGATAAAATAGAAAAGATGGCTGATAGTTACAAAGGAAAATCAGAAAATGAACTTATGGAGGAACTTATAAAAATAGGTAAGAACTTAGATGGAAGAGATGAAGTAGTATCAAAATTCAAAGCATTTTTAGATGAAAATCAACGCAAAAAACTAGATAATATAATGGAAAAAATCTCAGATGCAGAAAATCAAAGAGATACTAAACCAGCTAAAACTAAGAAGGCTAAACCTACTAAAGGTAAATCAAATTCACCTGCACCAAAAAATACACCAGGTGGTCAACAAAAAAAATCTAAAGGTTTATTTAAGAAAACTAAAAAGTCTAACCCTCATGAGTAG
HS-FS-000016-I-01_74_26	ATGGAGTTTTTAAAAATAATCATTAATATAGTTTTAGATATTTTAAAAAAAATTTTGGTCAGATTTAAAAATGCTAAATTTGGTTTGGTTTTTGTATTTGATTTACTTAAACTACCTGATTTTATGACAGATAAAAGAATCAATATAGTTGATAAAATAAAGGTAATTTCTGTATTAATTTTTACTATATCCTACTTTGTATCTGGGGTTGATATAATTCCAGAGATGATTGCAGGGGCATTTGGTTTTATAGATGATGCTATAGTTTTAATTTGGAGTATAGGTATAGTGAATGAAGAAATTAATAAGTATAGAGTTATTATAAAAAAAGATAAACATTCAAATATAATTGAAAATGTAGAATTTTCTATAAAAGATGAAGAAGAATAA
HS-FS-000016-I-01_73_78	ATGAGAGCAGTAGTGCAAAGAGTATCTTCATCTAAAGTTACAGTAGATGAAAACACTATAGGTCAAATAAATAAGGGGTTACTAGTATTGTTAGGAGTGACTCATGATGATAAATCAAGTGATGTAGATTATATGATTGATAAAATATTGAATCTGAGAATTTTTGAAGATGAAAATGACAAGATGAATTTATCTCTAATGGATATAGGTGGAGAGCTTTTAGTAGTATCTCAATTTACTTTATATGGAGATTGCAGAAAAGGAAGAAGACCTGGATTTAGTAATGCATCTAGACCAGAACTTGCAAATAACCTTTATGAAGAATTTGTAAAAAAAGCAAAAGATAAAGGTGTGACAGTTGGTACAGGTCAATTTGCAGCTCATATGATGGTAGAGTTA…
HS-FS-000016-I-01_75_85	ATGAAAAAAACTGATGATTTAAAGAAAAAATACTTTGATTTTAACTTAAAAAATACGATAATTGGAGTTTTTACAGGATTTATAAATGGAGTTTTTGGTTCTGGAGGAGGTACTCTTTTAGTTCCAATATTAAATGACATCGTTAAGGTAGAAGAACATAAATCTCATGCAACTGCTCTTTCTATAATAATATTCTTAACGACAGCAAGTTCTGTTTTATATGTATCTAAAGGTACTTATGATGTTAACTTAACAATTAAAGTTGCAGTTGGAAGTATTCTTGGTGGTATTATAGGAGCTAAATTACTAAATAAGGTTACTGGAAAGTTTCTTAGAATTTCTTTTGGAATAATTATGATAATTGCAGCATTAAGGATGGTGTTTTAA
HS-FS-000016-I-01_71_79	TTGGATATAAAATTACTTAACCAGGTAAGGTCAGTAACAAAAGGTATAGTAATATTTGATGTAGTTTTAATTGTGCTAATGTTGATAACATCAACATTAAGTAAACCAGTATTATTAGGACTTATATTTGGCTCTATAATAGCTATGTTAAATTTTAGATTATTGGCGATATCACTGGAAAAATCAGTGACATTTCCTGCTGGGAAGGCACAAGCTTATGCATCAGCACAATATGCTATTAGATTATTTATAATGGCAGTTGTTCTAATTGCATCAGCTACAGTACCACATTTAAATATAATCGGAACAGCATTGGGATTATTGAGCACAAAGTTTGTCATATTATCAAAAAACTTTATAAATAAATTAAAGAGGAAGGAGGCATAA
HS-FS-000016-I-01_63_540	GTGATTGAATCAATTTTATTAGTTACTTCTCTTTGTATAGATGCCTTTGTGACAAGCTTTGGATATGGAGTAAATAAAGTTAAAGTTCCCTTATATTCAAATATAATTATCAGCGTAGTTTGTTCAGCTATTTTAGCAATATCGCTTTTTGCAGGTACAATAGTTAGAGATTTTTTACCTCAAAATATAACAATGTTAATATGTTTCTTTATTTTATTTTTATTAGGAAGTGCTAGACTAATTGAAAGTTTTTTTAAATCTTATTTTAAGAAAAAATCTATACACTCAAAGAATTATAATTTTAATATGTTAGACCTTGAATTAAATTTTAATGTAAGTATCGAACCTGATGTCTTAGATACAAGTAAATCTAAAGTGCTTAAATCTGCTGAAGCATTT…
HS-FS-000016-I-01_63_543	TTGAATTTTATAGGCAATAGATATGAGGTAGTAAATTCTGATGACGTTTTAGAAATTAACAAAATCTATAAAGCTAGAGATGTTTTTTACAGGAGAAATGTGTTAATAAAAGTTATAAAGCACAATAATTATATTTGTGAAGATTTTGTTTCAAATTTAATTGATGAAAGTACTGCTTTAGATGAGATAAACTCTCCTTATATACTAAAAATAATAGATGTTGGGATTCACTGTACAGAAGAAACAACATTATATTATGTTGTAAGTGAAGACTTTAATGGTATCGGACTAGATGAATTAATTCTAGGTAATTATCTTCATTTAGAAGCAATTGTAAACATAATGATACAAGTTTTAAAAGCTTTAGAAATGATACATAGGAATCATTCATATCATGGT…
HS-FS-000016-I-01_72_43	ATGGCAGAAGAAAAAACTTATCCCTATGCCGTTGCACGAATAAGAGTGCTTGAAAAACAGCTTCTTAACAGACAAATGTTTATTCAAATGGCAGAAGCCAAAAGCCCTGAAGACTCTTTAAGAATTATAGCTGAGGCAGGTTATGCTGATACATCAAATAATAATATACATAATTTTGAGAATATTTTGACTCAAGAATTATCAAAGACATATGAAATTCTTAAAAGTCTAGCTCCTGAAGAAAAATTTGTTGATGTATTTCTTTATAAAAATGACTATCACAATTTAAAAGTGCTGATTAAAGAAGAAATTTCTGGTGTAGATGGTGAGAAATATTTAATTGATGGAGGTACAATTCCTCTTATTAAGCTTAGAGAATCTTTAGCAAATCGTAGTTTT…
HS-FS-000016-I-01_68_133	TTGTCCGATTATATAAATGAAGAATTAATAAAAAAGATTAAAAGTAGAAATGACAAGGATGTCAACTATACTAAGGAGGGTAAAATAATGAGAGTTAATACAAATGTAAGTGCTTTGATAGCAAATAACCAAATGGGAAGAAACGTAAATGCACAAAGTAAGTCTATGGAGAAGTTATCTTCTGGTGTTAGAATTAAGAGAGCTGCTGATGATGCTGCTGGGCTTGCTATATCTGAGAAAATGAGAGCTCAAATAAAAGGTTTAGACCAAGCAGGAAGAAACGTTCAAGATGGTATATCTGTTGTACAAACAGCAGAAGGTGCATTAGAAGAAACTGGTAATATACTACAAAGAATGAGAACTTTATCAGTACAATCTTCAAATGAAACTAATACTGCT…
HS-FS-000016-I-01_73_85	ATGGATTTATTGCATCTTAAGTATTTTCAAACTGTTGCTAGAATGGAGCACATAACAAAAGCATCACACAAGTTAAATATAGCACAGCCAGCTTTAAGCAAAACTATATCTTCCTTAGAAAAAGAACTTGGAGTTCAGTTATTTGACAGAAAAGGAAGATATATTGTTTTAAATGAGTATGGAAGATTGTTTCTAAAAAGAGTAGATAGCATTTTAGATTTAGTAGAAAGTTCAAAAAAGGAGTTACAAGACACTTCTTTAGAAAATTCAGGAGAAGTAAAGATATTATCTCCTGCAGCGGCTAATGTGTTACCATCACTTTTGAGTAATTTCAGAAAACTATATCCCAATATTACTTTTAATGTGTCACATACTTTGCCATCATCTTATAAAAAAAGT…
HS-FS-000016-I-01_85_34	ATGTCAGATATAAAAAATGAAGTATCTAAGAAAACGTTAAGCAAAAAAGATGTAATAAAATCATGGTTAAGATGGTTTTTCTTTGCGCAATCTAATTACAATTATGAAAGATTGCAATCAACAGCTTTCTCACATTCAATGTTGCCAGTACTTAAAAAATTATATCCAGATAAGGAAGAGTTAAAACAAGAAGTGGAGACTCATTTAGCATTTTTTAACACAGAACCTATATGTGGATGTGTTATACATGGAATAACAATAGCTATGGAAGAAGAAAAAGCTAATGGAGCAGATGAAATAAGTGGAGATGGTATGAATGCTATCAAAACAGGCTTGATGGGTCCACTAGCAGGAATTGGTGATACTTTAACTCAAGGAGTTATAACTCCTATAGTGTTA…
HS-FS-000016-I-01_73_62	ATGTCAAAAGGCAATAATAACAATAATTCAAGAAACAAATCTAAAAAGACCAGTCATCTGAATAGAAAAAAGCGAAAATTAAATAAGAAAAAGTTAGCAGTGTTGATTTGCTTTACAGTTTTATTTTTATTTATTGCATTTAAGGCTACTCAAGGTGTAGTAGCTTTGGTAAAAAGTATGGATAAAAGTAATAAAACTAGTCAACAACAAAAAGTTAACTCAGAACAATTTGACCTTGGTAATGAAGAGGAAAATAAAAAGAAAAAATATACTGTATTTATAGACCCAGGTCATGGAGGCAATGATAAAGGAACTGAAAGCAAGACCAGTAATAGATATGAAAAAGACCTAAATCTACAAATTGCAAAAAAATTAGCAAATAAATTATCTAAACAAAAG…
HS-FS-000016-I-01_81_22	ATGGATTTTAAACAACTTGAAGTATTTGTTGCTGTTGCAAAACATCAGAGTTTTTCAAAGGCCGCAAGAGAACTTTTTTTAACTCAACCTACTGTAAGTGCACACATACAGAATTTAGAGAGAGAGTTGGAAACTGTTCTTATAAATAGAAGCAACAAAGTTATTACACTCACAAAATCTGGTGAAATTCTTTATGAACATGCTATATATATATTGAATAATTGCAAACGTGCAATTTATGATATAAAAGAATATTCAGGAAAAATAGAAGGTATTATAGATATAGCATGTAGTTCCATACCTGAAACTTATATTTTACCTGATTTTATGAAGAGTTTTTCTATGAGTTATCCAGATGTAAAATTTTCCATAAGCCATTATGATTCTCAATATGCTATA…
HS-FS-000016-I-01_71_156	ATGTTAAGAAGACCAAGAAGACTAAGAGCAAGTAAAGCAATCAGAAATTTGGTAAGAGAAACTAAGGTGAATGTAGAAGATTTAATATATCCACTGTTTGTAGTAGAGGGGGAAAATATAAAAGAAGAAATCAATTCTTTACCAGATGTATATCATTTATCAATAGACATGCTAGAAGACGAAATAAAAGAAATAAGTGAGTTGGGAATTGAACATATAATGTTATTTGGTGTTCCAGATGAAAAAGATGAGTGTGCTTCACAAGCTTTTAATGATAATGGAATAGTTCAAAAGGCAATTAGAAAGGTAAAAGAAATAAATTCAGATATAAATGTAATAACAGATGTCTGTATGTGCCAATATACAAGTCATGGACATTGTGGGATTTTAACTGATACT…
HS-FS-000016-I-01_76_98	GTGAAAGATTATATACTTTATACCATTTTATTATTAACTGGATTATTTGGAACCTATGCTGTAATTCCACTATTTAAAAATTTATTGATAAATGGAAATGTACTTAGACCAAACTATAAAAAAGATATGATACCAGTAAGTATGGGAATTGTATTTTTGCCTATGATTGTAATCAATGGAATAATACTTGCTTTCTTTACTACAGAATTTAAGGATTTAGCGTATATATTTATGTTTATGTTTGGTATGATATCCATGTTTTTTGCAGGGATACTAGATGATGTCATTGGAAATAGAGATGTAAGTGGTTTAAAGGGGCATTTTAAAAGTTTATTTAAAGGAAGTCTTACAACAGGAGGTTTTAAAGCTTTATTTGGTGGATTTGTAGGGCTTATAGTT…
HS-FS-000016-I-01_64_107	ATGGAAATGATAATTAGAACACAAAGACTTTCAAAGGAATACAATAAAATATTTAGAGTAAAGGATATAGACCTAAGAGTTCCACAAGGAGCTGTATATGGTTTTTTGGGTCCTAATGGAGCTGGAAAATCTACCACTCTTAAAATGCTTCTTGGACTTGCTAAACCCACACAAGGAAATATTAATATTTTAGGTAAAGAGTTAAATGAAAAAAATAGAATATCAATTTTAAAAGATATAGGTTCTTTGATAGAATCTCCATCATACTATGGTCATCTTACAGGGCTTGAAAACATGACCATAATGCAAAGACTCTTAGATTTACCTAAAAAAAATGTAAATGAAGCATTAAAAATTGTAAGGTTAGAAAATCAAAAAAATAAAAAAGTTAATCAATAT…
HS-FS-000016-I-01_63_326	TTGAATAATGATAAGAAAATTATAAAAGTACATAATAAATCAGATAAACCTGATAATATTGTTATCAAAGAAAATGAACTCATAGAAAAATGTCTACTTTTGGAAAATAAACTTCCTGTATTTATGAAGGATTATTTTATATATTTAAAAGGTTCTGTTGCAGTTTCTACACGACTTGCTTATTTAGAAGATATTAATTTTTTTTGTTCATATTTGATTGAAACCAAAGAATTAACAAATGCAGATTGTGTAAAAGATATTACAGAAGATGATTTTAATACAATAAAATCAAGAGATATAAATTTATTCTTAGGTGATTATTGCAGTAGATATTACAAAAATACAGAAAAAAACACATTGATTTTTGAAAATAACAATAGAGCGTTAGCAAGAAAAAAA…
HS-FS-000016-I-01_84_14	ATGATGTTTAAAATAAATAATTTAACTTATCAATATGAAAAGAATACCAATGCACTATTAAATATTAATATGGATTTTTCAAAGGGAAATGTTATAGGTATAATAGGTTCAAATGGTTCAGGAAAATCAACATTATTTATGAATTTAATGGGTATATTAAAGCCTACATCTGGAGAAATTCTTTTTAAAGAAGAAAAGTTAAAATATGATAAGAGAAGTTTATACAACCTTAGAAAAAATGTAGGTATTGTGTTCCAAGACCCAGAAAAACAAATTTTTTATTCAAAAGTATATGATGATATAGCCTTTGCAATGAGAAATATTGGTATAGATGAAAAAATAATTAAAGAGAGAATAAACAAAGCTCTAGTAGCTGTTAATGGAATAGATTTTATAGAT…
HS-FS-000016-I-01_67_157	ATGAGTAAAAAAAATAAATCTCTTTTAAGTGAACTTAAGGGACACTTAATGACAGGTATCTCATATATGTTGCCACTTGTAATAGGCTCATCTTTAGTTGTAGCTATCCCAAAGCTTACAGCTTTAGCAATGGGTATAACAAGTTTAGATGCTTATAAAAATGTATCTGGTTTTTATCATATTCTTTACTTAATGGAACAAGTTGGTTGGACTGGCATAGGTCTATTAAATACGGTATTAGCAGGATTTATAGCATTTTCAATAGGTGAGAAACCAGCTATGGGTGCAGGTTTTATTGGTGGGCTCATAGCAAGTAATACTAATGCAGGATTCTTAGGAGCAGTAATAGCAGGTTTCTTTGCTGGGTATGTTTGTAAGTTTTTAAAGAAAAAAATTAAA…
HS-FS-000016-I-01_66_49	ATGAGTAATAAAATAGTTAGTAAGAGACAATTAACAGATAGTATTTATTTAATGGAAATAGAGGCACCTAGAGTTGCAAAATCTTCTCAACCAGGTCAATTTATAATAATTAAAAATGATGAAAAGGGAGAGAGGATTCCTCTTACAATAGCTGACTATGATAGAGAAAAAGGAACAGTAACTATTGTATTCCAAACAGTTGGTGCTTCAACTAAAAAGTTAGCAATGTTTGAAGAAAACGATTTTGTAATGGATTTTGTAGGGCCATTAGGACAAGCAAGTGAATTTATACATGAAGATATAGAAGAATTAAGAAATAAAAAGATATTATTTGTAGCTGGTGGAGTTGGTTCTGCTCCAGTTTATCCACAAGTTAAATGGTTTAAAGAGCATGGATTA…
HS-FS-000016-I-01_71_69	ATGACGATAAAAGATATAATTATTAAATATTCAGATAAACTAAAAGATATAAGTGATACTCCAAGATTAGATACAGAGTTATTGTTACAAAAAACATTGGGTGTTGATAGATTATATATTCACTTAAATCTGAATAAAGAGCTAACTGAAGAACAAAAAACAAAATTTATGGGTTTTGCAGAAGAAAGATTAAATGGAAGACCAATAGCATATATAGTTGAAAATAGGGAGTTTATGGGATTAGATTTTTTTGTTAAGGAAGGCGTATTGATTCCAAGACCAGATACAGAAACTTTAGTAGAAGAAATAATTGAAATATGTAGAGAAAAAAAAGATGTAAGTATATTAGATATAGGAACTGGTTCTGGAGCTATTACAATAAGTTTAGCAAAGTACATT…
HS-FS-000016-I-01_64_89	ATGGGCATATGTAGATGGAATGTATCCAGTAATGTAAAATGTGCAAAAAATTCTTTTGTAGTTAGTGCATTTGTTATGAATTTAGTTTACTACTTTATGCTATTGGTAGGAGTAATTTTATTTGTTTTTTATGGGGGAAGGACATTTGAAACTTCAAATGAAATAATGATTACTTTTATTTTAAATGAACTTCCAGTAGGAGCCATTGGAATTATTATTGCAGGTGTGTTTGCAGCAGCAATGTCTAGTATCGACTCTATATTAAACAGTATGACAACTGTTTTTACGAAGGATATTTATGAGTTTTATTTCAAAAAAGACAACAAAGAATCATCATTAAAAGTTACAATGATTATAACTGTAGTTATAGGAGTTGTTATGACAGGTTTTATTATTATG…
HS-FS-000016-I-01_63_264	ATGGCTTTAATACTACCAAAGGGATTACCTGTTATTAATAAATTATTAGATGAAGGAATAGATGTAATTTATAAAGAAGATTTTAAAAAGGAATTAAAGTATGAAGAAAACATAGACACTAAAATAGCTATACTAAATCTAATGCCTATAAAGATAGATACAGAATTAGATTTACTAAGAAGGATAGATAAAACAGGATTCAACGTGTCTGTTGAATTTATTAAAATTTCAACAAGAGAAAGTAAAAGAAGTTGTAATGAATATGTTAAAGAATTTTATAAAACATTTGATGAAGCCAAAGGAGAGTATTTTGATGGCTTTATAATAACAGGAGCTCCAGTTGAACAAATGGAGTTTGAAGAAGTTGATTATTGGAATGAACTAGAAGAAATTATGGAT…
HS-FS-000016-I-01_70_34	ATGTTAATCAATATGAAGGAAATGCTAAAAGTGGCACAAGAAAATCAATTTGCTGTACCAGCATTTAATATAGGAAGTGGGCAAATACTTAAAGCAGTAGTACAGGGTGCTAACGAAAAAAATGCACCAGTAATACTTGCAATACACCCAAATGAGCTAAGTTTTCTAGGCGATAGCTTTGTAGTTAGTTGCATAGAAGAAGCAAATAAGAGTAAAGTACCTATGGTAATACACTTAGATCATGGGGAAAATAAAGAACAAATATTAAGGGCAATAAGATGTGGATTTACATCAGTAATGATTGATGGCTCACATTTACCATATGAAGAGAATGTAGCTATATCTAGGGAAATAGTAGAAATAGCAAAAGGATTAAATGTGTCCGTAGAAGGAGAACTT…
HS-FS-000016-I-01_63_105	ATGAATAAATTAGAAATAGAAAATCTTTCAAAGATATATGGTAAAAAAGTAGCAAACGACAAGATTACAGTAACTCTGGAAAATGGAGTTTATGGTCTTCTAGGACCAAATGGAGCAGGAAAATCTACATTAATGAAACAAATAACAACGTTGATAAAACCTGATGAAGGTCAGATACTTTATAATGGTGAGGATATATTTAAAATGGATGCTAATTATAGAAATATTTTAGGATATTTGCCACAAGAATTTGGAGTTTATAAAAATTTTACAGCAAAAGAATTTTTACAGTATATTGGAGCTTTAAAAGGTTTAAGGGGAAAATATTTAAATAGTAAGATAGGAGAATTATTAGATTTAGTAGGTCTTTACGATGTGAGAAATAAGTCTATAGGAAAA…
HS-FS-000016-I-01_74_5	ATGCAGATGACAGTTAAAAAAGCAATAATACCAGCAGCAGGGCTAGGAACCAGATTTTTACCAGCAACAAAATCACAGCCCAAAGAAATGCTTCCTATAGTAGATAAACCAACTTTACAGTATATAATAGAAGAAGCTATAGAATCGGGAATTGAAGAAATTCTTATAATAACAGGTAGAAATAAAAAATCTATAGAAGATCATTTTGATAAATCAGTTGAATTAGAGTTAGAACTAGAGCAAAAAGGTAAGACAGAGATGTTAGAAATGGTAAGAGACATATCAAATATGGTAAATATTCATTATATAAGACAAAAAGAGCCAAAAGGTCTTGGACATGCAATTTACTGTGCAAAAAGTTTTATAGGTGATGAACCTTTTGCCGTATTATTAGGTGAT…
HS-FS-000016-I-01_82_48	ATGGCAGTTAAATATGCAAAAAGAATGCAAGGATTACAAGGATCAGAAATACGTGAGCTTTTAAAACTTACTCAACAACCACAAATAATATCTTTTGCTGGTGGAATGCCGGCTCCAGAGTTATTTCCAGTTGAGGAAATGAAAAAAGTATCAGTTGCAGTGCTTGAAGAAAATGGAAGATCAGCTATGCAATATACTACAACAGAAGGATATGAACCATTAAGAGAAAAAATAGCAGCTAGAATGAATGATAAAAACAAAACTAATGTAAACAAAGATGATATATTAGTTACAAGTGGTTCTCAACAAGGTCTAGATTTTGCAGGAAAAGTATTTATTGATGAGGGTGATGTAATTTTATGTGAAAGTCCATCTTACATAGGAGCTATAAACGCATTT…
HS-FS-000016-I-01_63_125	ATGATAAATAAGAATGTATTTACCAGTACTAAAAATCATTTAATAAAAATGTATATTATTGTAGTAGGTAGTTTTTTAATAATCTTTTCTATATTTATATACTCATATTTTAGGGGACTTACATATAGTGGAATTGATAGTGAGATAAATGATGAACTTGAATATATAGTCTCTCAATTTAAAAGAACTTCATTTTTGAACCCAATAAGACTGAAAGATCCTAAAGATATGGTGTATGTATATGAAGATGGAAGGATAAGTTACTATACTCAAAATGAATATTTTGATGAGTTACTTCCAGATAGAAGACTAGATAAAAAAAATTCGTTTTTTAAATACACAGAAAATGGATATACTTTTAGAGAATTAAATGTAGATGTAGGTAGATACCAAATACAG…
HS-FS-000016-I-01_63_641	ATGTTTATTGAATTTTTTTATTTATTGAGGTCAAGAGGATTAAATATATCTTTAAATGAATGGATGACTTTAATTGAAGCATTGGATAAAGGGCTGTGCTATTCAAACTTTTCAAATTTTTACTATCTTTGCAGGATGATTTTAATAAAAAGTGAAAGTGATTTTGATAAGTTTGATGCAGTGTTTTTGGAGTATTTTAAAGGTATAGAACACCAAGAAGAAATTCCAGAAGAGATTATGAATTGGCTTAAAAAACCAGATATAGATTTAGAAGAGTTTGAAAGATTGGAACAAAATCCAAATATAAATCTTGATAAATTAAGAGCTAAATTGGAGGAACGAATAAAAGAACAAGACTCTCCTCATAATGGTGGTAATTATTGGATAGGCACAGGAGGC…
HS-FS-000016-I-01_72_29	ATGAAGGAAGTTTTTATATTAGGAGGATTGAGAAGTCATATAGGTCTAAAAAATGGAATTTTTCAATTTGTTCAACCTGAATTACTAGGAGCAAGTGTTTTAAAAGATTTAATTAAAAAGTATGAAATTGACAAAATTGATGAGATTATATGTGGAAATGCAGTTGGGACAGGAGGGAATATAGCCAGATTAATGACTTTAACAGCAGGAGTGTCAAATGAAGTACCTGCTTTTACTGTGGATATGCAGTGTGCTTCTGCTATGATGAGTATAGACATAGCTTTTTCAAAGGTTAAATCTGGTCAGTGTAATTTAATTATTGCAGGTGGTTTTGAAAGTAGTTCTCTACAACCAATGCGCACATATCATAAGAATGATAAGCGATATAATACAAATAAT…
HS-FS-000016-I-01_67_55	TTGAGTACAAAAAGGGATTATTATGAAGTCTTAGGTATCAGTAAAGATGCAGAAGCTCAAGAGATAAAAAAAGCTTATAGAAAATTAGCAATGAAGTACCATCCAGATAGAAATCCTGGAGATAAAGAGGCGGAAGAAAAATTTAAAGAGATAAATGAAGCTTATGAAGTTCTATCTGATGATACAAAGAGAAAAACTTATGACCAGTTTGGACATGATGGATTAAATGGTCAAGGTGGTTTTGGTGGTCAAGGAGGATTTGGCGGTCAAGGCTTTGGTGGTTTTGAAGATATGTTCGGAGATATATTTGGTGACATGTTTGGAGGAAGCTTCGGAGGTGGAAGAGCAAGAAGAAGAGGGCCTCAACGTGGTGCAGATATAAGACAGAGTGTTACTATA…
HS-FS-000016-I-01_63_258	ATGGAAATGTTGATATCCGCTTCTGAAGAGGCGTTTTTACATGTAGGTTCTATGATTGGATTTTTTATTTTGTTATTTGGATATATTAATTATAAAACTAGTGGAAATTTTACTAATATCATATCAAAAAACAGAAAATTTCAACCCTTAATAGGTGCTTTAATTGGAGCTATACCAGGTTGTGGCGGAAGTCTGGCAATAATGCCATTGTATATAAATGGAAAATTAAGCTTTGGAGCAATAATTGCAAGTTTAATAGCTAGTATGGGAGATGCAGCATTTGTACTTATTTCATCAAATATTAAAATGTATTTTTTTGTCACTATAGTTAGTACAATTACAGGAATAATAACGGGACAATTAGTGGATTACTTTAAACTAGAAGAAAAATTAGGGTTA…
HS-FS-000016-I-01_63_385	ATGAAATTCTATAAAAGAATATTAACATTGACTTTAAGTATTTCTTTTGTATTTGCAAATATTCAATTAGTAGATGCAATATCATCTGTAGAAAAAATACAAGGAAAAAATAAGTATGAAATAGCAGGCAAAATAGCAGATAAAAATGCATATAAAACTGCTATATTAATTAATACTAGTAACTCTATTGCAGATGGATTAAGTGCAAGTGGACTAGCAGGAGCTTTAAATGCCCCTATACTATTAACTGAAAAAAATACTATACCAACTGAGACATCTGCAAGATTAAAAAATGTATCAAAAGTTTATATAATTGGAGGAACATATTCTATTAGTACATCTGTCGAAAATTCATTAAAATCTAAGAAAATGAAAGTTGTAAGAATTAAGGGAAATGAC…
HS-FS-000016-I-01_64_46	ATGAAGATAGTAGTAGTAGGTGGTGGACCAGGAGGATATGTAGCAGCTATAAAAGCTTCTATGCTTGGTGCAGATGTAACGGTTATTGAAAAAAGAAGAGTTGGAGGAACTTGCTTAAATGCAGGATGTATACCAACTAAAGCACTTCTTGCTTCTTCAGGAGTATTGAATACTGTAAAAGAAGCAAAGGATTTTGGTATAGAAATAGATGGTACAGTTAAGCCAAACTTCACTGCCATAATGGAAAGAAAAAATAAAGTTGTAAACCAATTAATAAGTGGTATAGAGTTCTTATTTGAAAAAAGAGGAGTAAACTTAGTTAATGGTTTTGGAAAATTAATTGATAAAAACACTATAGAAGTAACTAAAGATGATGGAACAGTAGAAACTATAAAAGCA…
HS-FS-000016-I-01_66_50	ATGGATGCTAAAAAAGTAAAAGTACCAGTTAGAGAACAAGAACCTGCTGTGAGAGCAACAAATTTTGATGAAGTATGCTTAGGGTATAATAAAGAAGAAGCTATGGCAGAAGCTAATAGATGTTTAGCTTGTAAAAAACCAAAATGTGTGGGTGGATGTCCAGTAGGAATCGACATACCAGGGTTTATAACAAAAATTAAAGAAGATGATATAGAAGGTGCTGCTAAAGTAATAGCTAAGAGCAGTTCATTACCAGCTGTTTGTGGTAGAGTATGCCCACAAGAAAGTCAATGTGAAGGTGTATGTATACTTGGAATAAAATCAGATGCTGTATCAATAGGTAAATTAGAAAGATTTGTAGCAGATTGGTCAAAAGAAAATGACATAAATTTATCTGAT…
HS-FS-000016-I-01_65_61	ATGCAATTGTTCAAAAAGAACACCAACAAGATAAAGGTAATGGCCTTGGGTGGACTTAACGAAGTTGGAAAAAATATGACTGTTGTTGAGTATAAAGATGAAATAATTGTTATAGATGCTGGACTTAGTTTTCCAGAGGATGAAATGTTAGGAGTAGATATAGTTATACCAGATATAACTTATTTAGTAAAAAATAGGGATAAAATAAAGGGTATATTTATTACACATGGACATGAAGACCATATAGGAGCTCTTCCATATATATTAAAGAAAATAAATGTACCTGTATATGGGGCAAGACTTAGTATAGGTCTTATACAAGTAAAACTTAAAGAACATAAAATGAATAATGTTAAGTTAAATGTTATAGGTCCTAGACAAGTTATAAAGCTTGATAAT…
HS-FS-000016-I-01_63_266	ATGGATGAACATAAACCCCAAAAAAGGTCAGCACTCTATTATTATACAGTTATAATAATAGTAGTAATGTTTTTAAATGCTTTAATATTTCCAAGTTTAATGGATAAAAAAATGGTTGAGATTGACTATGGAAAGTTTCTCACAATGTTGGATACAGGAAAGGTTAAATCTGTTGAGATAGAAAATAATAGAATAGCAATAAATCCATCTAGTAGCAAGGATAAGAATATATACATAACTGGTAGAATGGATGACCCAGAATTGGTAGATAGACTAAAAAATGCAAAAGTAGAATTTACTAAGGTTATTCCTAAGGAAAATTCACCTCTTTTAAGTATTTTACTTACATGGATAATACCTATAGGTATTCTTATGCTATTTGGTAACTTAATGATGAAG…
HS-FS-000016-I-01_67_62	GTGGACAATAAACAAAGTAGAACTAGAAATTTTAGTATAATTGCACATATAGACCATGGAAAGTCTACCTTAGCTGATAGATTAATACAACAAACTGGGCTTGTTAGTGAAAGAGACATGAAAAGTCAATTACTTGACAATATGGACCTTGAAAGAGAAAGAGGAATCACTATAAAGCTTCAAAACATAAGATTAATGTATAAAGCGAAGGATGGAAATGAATATTATTTAAATCTTATAGATACACCTGGACATGTAGACTTTAACTATGAGGTATCAAGAAGTTTAGCTGCATGTGAAGGAGCACTATTAGTAGTTGATGCAGCTCAAGGTGTTGAGGCACAAACTTTAGCCAATGTTTATCTTGCTATAGACCAAGATTTAGAAATATTACCAATA…
HS-FS-000016-I-01_70_77	TTGTTAGTAAAATTTTTAAAGATTTTATGGATAGATATAAATAGTTTTACTTATTTTGTAAAATTTAAAATACCATTAATTACCTTAAATATTTTAATAGGAGGACATATGAATTTAAATAAAGTTAAATTTACTGAAGAACATGCTATTGAAGTTACTAATTGGAAATATGAAGGTAAATATTCAATATACAACCTACCTCCATGGGAGGAAATTAAAAAGAAGAATTTTTCACTATCAAAAGAAGATAAAAGAAAAAATTTTATAAGTTTTATAAATGACAATAAAGAATTGATAGGTTTTATAAACTTATTGGATGAAGGAAGTTATGTATTCTTTGGTATTGGTATAAAACCAGATTATTGTGGAATGGGAATTGGCAAAGAAATAATTAGCCTA…
HS-FS-000016-I-01_70_128	ATGAATAGTTTAAGAAAGATTATAGAAAAACTGAAAAATGTAGATATTTCAAATTGGATTAAACAAAATTTTGGACTATATTCAGTTAGAAAAAAAGTGTTTTTACTTTCTAAATTATCAGGAGCGTTAATTATATTATTTTATCTGGTTGTTGAAGAATTTTCGATAAACTCTAAATTTGAATTTTGGATTTGGTTTATAATACTGGTTATATTTATTATGAGTATTGATTTTTTATTGGGAAAATTTATTTCAGAACCAATCACATCTATAAATAAATCTGCAAAAAGTATGTCCCAACTTGATTTTTCTAATCCATGTACTGTAAATACTAATGATGAATTTGGAGAACTTTCTAGGAGCCTGAATACAATGTCTACAAATCTACAACAGGCATTA…
HS-FS-000016-I-01_65_242	ATGTTGTCAAAAGCTGAAATCAAATATTTTAATGAATGTGCTTCTGAGATACTTTCTTCTGAAAAAGTTCAACTTATGAGAACATTTCCTCATCATGGCAATGTTTCATGTCTTGAACATAGTTTGTCAGTAGCATATTATAGTTATCTATTATGTAAAAAATTGCACTTACGTGTTGATATTCAAAGTGTTATTAGAGGAGCTTTACTACACGACTTTTTTCTTTATGATTGGCATTACAAAGGTGATAGAAAAGGATTACATGGATTTACTCACCCTAGAGAAGCATTAAAAAATGCAACTTTATTTTTTCAAATAAATGAAAAAGAAACGGACATAATTTTAAAACACATGTGGCCACTTACTGTTAAGCCACCTAGATACAAAGAAGCATTTATT…
HS-FS-000016-I-01_65_225	TTGAAGAGATTAATTGCTTTAGTGTTAGTAATACTTATTGTTTTATTTTATAGCCCTGAATTGATAGAAGAAGGATATGATTTAAAAGAAAAATTTTTTCAAAGTGAAATATGGAATGAATTTTTAGACAAAATAAATATAAATAATAATTCTAAGAAAGATAAAAAAGAACAAAATCAAAATTTACAATCAAATAATACTGAAGGGGAGAACTTAGGAGAGTCAGATATAAAGAATTTTGAAAAAATAAGCTTAGGAGATAATTTAAGCTATGTTTTATCAAGTATTGGTAAACCTGGTAGAATTGATATTAGTGAATATGGTTTTGATTGGTATGTATATAATCAATATGGAAAAGAATTTGCAATGGTCGGACTTGAAAATGATGAAGTAGTAGCA…
HS-FS-000016-I-01_69_94	ATGGAGAAAAAAATTTTAACAGTTTGTCCATACTGTGGAGCTGGATGCCAATTATATCTAGTAGTAAAAGATAATAAGATATTAAGAGCTGAACCGGCTAATGGTAGAACAAATCAAGAAAGTTTGTGTTTAAAAGGTCGTTATGGATGGGATTTTCTAAATGACCCTAAAATTCTAACACCTAGGCTAAAAAAGCCAATGATAAGAAAACAAGGTGTACTAGAAGAGGTTGAATGGGATGAGGCTATAAACTATACAGCTTCAAGACTAAATGAAATTAAAGAAAAATATGGACCTGATTCTATTATGGGAACAGGTTCTGCAAGAGGACCTGGTAATGAAGCAAACTATATAATGCAAAAATTTATGAGAGCTACAATAGGAACTAATAATGTTGAC…
HS-FS-000016-I-01_69_114	ATGTTAGAAATATCACATAAAGTTAAAGAAATTTATCCCAATATTAAATTTGGAGTTATGGTTATAAATATTACACATTCAAAACCTAATAAAGAAAATTTTTTAGTTCTTAAAAACTCTACAATTAAAAATATTATAGAACAACACCCAGAATACAATCGTAAAGAAAAAATTAAAACAGAGCCTGTTTCAAGTTATATAAAGTATTATAAAAAATTCAAGAAAACTTACCCTGTATTGCTTCAATTAGAATCTATTCTATTAAAATCAAAAGGTATCCCAGATGTAGGTGTAACAATTGAGTCAATGTTTTTAGCAGAATTGAAAAATCTTCTTCTAACAGCAGGTCATGACCTTGATAAAATGGAATTACCTTTGAAAATAGAATTAGCAAATGGA…
HS-FS-000016-I-01_70_132	ATGATAAGTGATTCTATATCAAAAAGACGAAGTATCAGAAAATATAAAAATCAAAGCATTTCACATGAAACTATAGAGAAAATAATTGAAGCTGGAATAAATGCACCTTCATCTAAAAACAGGCAACCATGGCGTTTTGTTGTCATCACTGAAAAGGAAAAAGAATCTATGCTTAAAGCCATGAGCAAAGGTATTCAAAATGAAATTAATGATAATGGGCTTCTTCCAGGAAGTCGTCAACATATCGCTGGTGCAAATTACACAGTTGAAATCATGAAACAAGCTCCAGTAACAATTTTTATTTTAAATATATTAGGTAAATCACCTTTAGAAAAGCTATCCCCTGAAGAACGATTCTATGAAATGGCAAACATGCAATCAATTGGAGCTGCAATTCAG…
HS-FS-000016-I-01_70_81	ATGGGGATGATAGGATGTTATACTAAAATAAGTGAAGAGAATGTTTTTAAATTACAGCAAGCAGAAGAAAATTTACAAGATTTTGTTTTTGAAGATGCCAACGAAAATAGTACTATCAATATTGATAAAGCATGGCATGCCATTCACTTTACTTTGACAGGTTGTCCTTTTGGTGGAGATGATGAGAATATATTTAGCAAATTAGTACTAAGTGGAAACATACTTATGGAAATTGATGGAGAATTTCCTGTCATGTTGATTACAGCAAATGATGTAAAAAAACTATCAAAAGCAATGAACAGTTTGGAAGAACAAGCATTTAGAAAAAGATTTAATATTAATGAGATGTTAGAAAATAATATTTATCCTGTTATGAATGATGAGAGTGAAGATGATTTT…
HS-FS-000016-I-01_70_97	ATGAATTTTAATAATAGTCTAGAATTAACTCAGTCTCAGAAGCTAATAATGACTACACAACTTAAGCAATCATTATCAATATTAAATATGAGTAAGTTAGAGTTAGAAGAAGAGATAAAAAGAGAAGCAGAGAATAACCCATTAGTTGAAGTCGAGAAAAGTGGGGAGATAAATTGGGAAGAGTATATAAAAGACATGGATAGGTCAAGACGTTTAGATAGAACAGAGATAAGCTATAATCCTGATAATGAAGTTAATCTAGAAAATTTAGTTAAATATTCGTCAAATTTATATGAAGATTTAAAATTTCAGATAAGCCTGTATAAACTTACAGACAAAGAATTGGAAGTCTGTGAGTATATAATTGATAGTTTAGATGAGGATGGATATTTAAGAACT…
HS-FS-000016-I-01_70_108	ATGTCAAAAGTAGTAATAGCTACAGAGAAAGCTCCAGGAGCAATTGGACCATATTCTCAAGCAATTCAAGTTGGAAACATAGTTTCTACATCAGGTCAACTTCCAATAGATATGAAGACTGGCGAGTTAGTATCTGACCCAAAAGAAGCAACAAAAGCTTCTTTAGATAATGTAAAAGCAATATTAGAACAAGCTGGTACAAGTATGGATAAAATATTTAAGACTACAGTATTCGTAAAAGATTTAAAGGATTTTAATGATATTAATGAAGTATATGCTACATATTTTAAAGAAAATCCACCAGCAAGGTCATGCGTACAAGTTGCTCAATTACCAAAAGATGCAGTTTTAGAAATTGAAGCAATGGCAGTATTATAA
HS-FS-000016-I-01_69_112	TTGAAAACAAATACAGATGTTATTATGGAGATAATTGATTATATAGAAGAAAATCTTACAGAAAATCTAAATTTAGATAAAATAGCTTATATTGCTAATTATTCAAAATACCATTTACACAGAATGTTTACAAATGTTGTAGGATGTACTATCCATCAATACATACAGAGGAGGAGACTTACTGAAGCAGCTAGACAACTTATATTTACAGACAAATATATTATAGATATAGCTATTACAGTAGGATATTCTACACATCAATCTTTTACACTAGCATTTAGAAATTTATATAAAGAATCTCCACAAGTATATAGAAATAAAGATGAATTTTATCCTATTCAACAGAGATTTGTTTTAAATCTAAATCATCAAATTCAAAGCGAAAAATGTATTTCTTAT…
HS-FS-000016-I-01_69_119	ATGAGTTTATTAAAAGTAACTAATTTATCACAATGTTTTATGGATAAATCACTGTATGAGAAAGCTAACTTTGATTTATTCAAAGGTGAACATATAGGTGTAGTTGGCCAAAATGGTACAGGTAAAAGTACATTAATTAAAATTTTATTGGGAGAAGTTGTTCCAGATTCAGGAGAAATCAAGTGGCAACCTAATATCAATATAGGCCATTTAGACCAATATGCAGAAATCAATAGAGATACAACAATATCACTCTATTTACACACTGCATTTGAAGAACTTTATAAAATAGAAAAGGAAATGAATTTACTCTATCAAAAAAGTGCTATATCTGAAAATGAGCAATATCTAATCAAAGCATCAGATTATCAGGAACAACTAATAGCAAGTAATTTCTAT…
HS-FS-000016-I-01_63_238	ATGAGTGTTAGTTTACAAAAAGGACAAAGAGTTAGCTTAGTAAAAGATAATAATCCTGTAAAAAATCTAGTAGTAGGCTTAGGATGGGATATGAATAAATTGGGTAAAAAAAATTATGACCTAGATGCATTTGCAATAGCATTGACTAACCAAGATAAAATGAATGTTAGAGGTGACTTGGTTTATTTTGGAAATCTTAAACACCCTTCTAAAGCTATTATACACACTGGAGATAACTTAACTGGAAAAGGTGAAGGTGATGATGAACAAATAATTGTTAATTTAGAAGACATACCTGAATATGTACATAAAATAGTTTTTGGAGTTTCTATATACAAAGCTAAAAAAAGAGACCAAGATTTTGGTCAAATGAACAACTCTTTTATAAGATTAATTGAT…
HS-FS-000016-I-01_63_245	ATGGAAATATGCATTCTTATGGGAAGTCCTAAGAAAAAAGGTAATACTGCTGCTATTTTAAAACCTTTTATTGAGGAATTAGAAAATTATAATTCAAATATTGAAGTAATATGGTTATATGATTGTAAAATAGAGCCATGTATTGCTTGTAAAAAATGTCAGGATAACTTATTTGATTTTGGATGTTATTGTAAAGATGATGTTCAGAAAATTTTCAAGAAAATTCTTATGTGTGATTTAATTGTTTTTGCTACTCCAATTTATTCTTGGTACTGCACTTCTCCAATGAAAGCACTACTTGACAGATTGGTGTATGGAATGAATAAGTACTATGGTAATGAGAAAGGCCCCGCTCTATGGGCAGGAAAACCAGTAGCACTTATTACAACATGTGGATAT…
HS-FS-000016-I-01_63_169	ATGGACATACTTGATGATATAGCAGAATGTATATTAAATATGGGTGTAGATAATATAGAGAATTTAGTAAAAATTGCTATAGATAAAAATATTGATGTGGAAGATATTTATGAATATGGTTTAAACAAAGGTATGATAGGAGCTTTAGATAAGTTTGAGAATAAGGAATACTATCTTTCAGAAGTTATAGTATGCACAGATGCATTAAATAAAGGTATTAATCTTTTGAAGGGAACTGGAAAAGTAAAGAAAAAATCAAAGGGAGTAATTCTGATGTCTGTAGTAGAAGGAGATACTCATGAGATAGGAAAAAATATTGTAAAAGTAATGGTAGAAGCCACTGGATATAAGGTTATTGACTTAGGTGTAAATAGAAAAAGTGAAGATATAATAGAAGAA…
HS-FS-000016-I-01_66_64	ATGAGAATTTGGAAGGTAGAAAGAAATACTTTTGAAACACAGATTTTAGTAGAATTAAATATTGATGGTTCTGGTAAAGCTGAAATAGATACTGGAATAGGATTTTTAGACCATATGCTTACCTTAATGTCATTTCATGGCAAGTTCGATTTAAAAGTGATTTGTAAGGGTGATACATATGTAGATGACCACCATAGTGTAGAAGATATAGGTATAGCTATAGGTGAAGCATTTAAAAATGCACTAGGTGACAAAAAAGGAATACGAAGATATTCTAATATCTATATACCTATGGATGAATCTCTATCAATGGTAGCAATAGATATAAGTAATAGACCTTATCTTGTATTTAATGCTAAATTTGATACCCAAATGATTGGTAGTATGAGTACTCAATGC…
HS-FS-000016-I-01_68_204	ATGAACAATTTAGATAAAAACAATGTTAATGAAGTTTTGGATATGCTATTAAGAACTAGAAGATCCATAAGAAGTTTTACAAAAGAAGTACCTTCAAAAGGGCTGATTGAAGAAATAATTGAAACTGGAAGACTTGCACCTTATGCAATACTTTCAGTAGCAAAACAAACAGATTTCAGACATTTCTTTGTTATTTCAAATAACAGTTTACAAATGAATAAAATAAAAACCATTCTTGTTGATGTTATTAAAACTCAAATATCAGTCAATGAGAAGAAGGCAAAGAACAACATTACCCTTCAATCCTTCATTACTTCCTTAAAAATGCAAGTTGAAAAAGGGGTTCTTGGTATAGGAACAGCACCTTATCTTATTATTGTGGCAGAACGTCGTGGAATA…
HS-FS-000016-I-01_63_114	ATGATAAAACTAATCGGTATATTGATAGTTGTAATTGGATTTATACTTAAAATTGACACATTATTTACTGTATTATTAGCAGGAGTGGCAACAGGAATTGTTGCAGGATTAGATTTTAATCAAATTTTTACAATTTTAGGAGATTCTTTTGTCTCAAACAGAGGTGTATCATTATTCATATTAACACTGCCAGTAATCGGTGTATTAGAAAGATATGGTTTAAAACAAAGAGCTGTTTCTTTAATAGAAAAATTAAAAAGACTTACAACAGGAAAAGTACTTACTATATACATGATAGCTAGACAAATAGCTGGTGCTCTATCAATAAGAATGAGTGGACATCCTCAATTTGTAAGACCACTTGTTAATCCTATGGCACAAGCTGCTGGTTTAAGTAAT…
HS-FS-000016-I-01_73_8	ATGGCTACATTTAAAAGATTACAAGAACAAGCATATGACTACTTAAAAGAATTGATACTATCTGGAGAAATGATAGAAAATGAAATATATTCTGAAACAAAACTTGCTAGTGAAATAGGTATCTCTAGAACACCTATAAGAGATGCTCTTCAAAGACTTAGTCAAGATGGATTTATAGATATAATCCCAAGCAAAGGATTTAGAATCCATCAAATTACAGCAAATGAAATTGTAGAGATATTCCAAATACGCTCTGCAATAGAAGGGTTTTGTACTTTTTTAATTACAAGTCAATACAAAGAAGCTAGGGCAGTAGAAACTATAAGTAAATTAAAACATCTTTTAGATAAACAAAAAGATATTTTACTAGGTGATAAAAATTTAAACTCATTTGCAGAA…
HS-FS-000016-I-01_66_41	ATGTTAATTAAATTAGAAAATATTCAAAAATATTACAAAGTAGGGAAAGATGAATTACATGTTTTAAAATCCTTAAATTTAGAAATTGAATCTGGAGAATTTGTCATGATAATGGGTAAGTCTGGTAGTGGTAAAACTACTTTACTTAATATCTTAGGTTTTCTAGATGTATTTGATGAAGGAAGATATATATTTGATGGAACAGATGTAACTAATTTGAGTGAAAATGAACGTTCTGTTTTTAGAAATATTAATATTGGATTTGTTTTCCAACAATTTAATTTAATAGAAACTCTAAATGTATATCAAAATGTAGAGTTGCCTCTAATTTACAATAAAGCACTAAAAAAATCTAATAGAGAAGAAATTGTTAAAGATAAATTAAGTTCTGTTGGGCTT…
HS-FS-000016-I-01_77_84	ATGAGGTTTTTTATAGACACAGCCAATATTGAAGAAATAAAAGAAGCAAATGATTTAGGTGTAATATGTGGTGTAACTACTAATCCGTCTCTAATAGCTAAAGAAGGTAGAGATTTTATAGAGGTAGTTAAAGAAATAAGTGAAATAGTAGATGGGCCAATAAGCGCAGAAGTAATAAGTTTAGAACATAAAGGTATGATAGAGGAAGCAGAAAAATTATCTAAGATACATAAAAATATAGTTATAAAAATACCTATGACAGCAGAAGGTCTAAAAGCGGTGAAAGTACTATCAAGTAAAGGTATAAAGACTAATGTAACGCTTATATTTTCTGCTGGACAAGCTCTTTTAGCTGCTAGAGCTGGAGCTACATATGTAAGTCCTTTTGTTGGTAGATTG…
HS-FS-000016-I-01_76_22	ATGAATATAATCTTGGCATCAGCCTCTCCAAGAAGGAAAGAAATTCTAGAGAATACGAATGTAAGATTTGATATAATTAAAAATGAAATTGATGAGATTATATTGGAAGGTGAAACACCAAAACATTTAGTTATGAGATTAGCTTTTGAAAAAAGTATGTCTGTAGCATCTGAACATAATGAAGATGTTGTTATTGGAGCTGATACAGTTGTTGTTTTAGACAATGCTATTTTAGGAAAACCAAAAGATGAGTCTTGTGCAAGAGATATGTTAAAAAGACTATCTGGAAGAGAGCATCAAGTCATAACAGGTATTAGCTTAATAAACTTGTGCGAAGATAAAAAGGTAATTGACTATGTAATCAGCAATGTGAAATTTAAAACGTTATCAGAGCAGGAT…
HS-FS-000016-I-01_74_44	ATGAATAAAATAGTTAGCATTGATGAAGCTCTATCTCATGTAAAAGATGGAGATACAATAATGGTTGGTGGATTCATGGCCAATGGTTCACCAGAAAATTTAATTGATTATTTATGTAGTAAAAATATAAAAGATTTGACACTAATTTGCAATGATACTGGCTTTATTGACAAAGGAGTTGGCAAAATGGTTGTAAATAAGCAATTTAAAAAGATAATTGCTTCTCATGTAGGATTAAATAAAGAAACTGGAAGACAAATGAACAACAATGAAACAGATGTTGAGTTAGTTCCTCAGGGAACTCTTGCTGAACAAATACGTGCAGCTGGTTATGGTCTAGGAGGTATACTCACACCGACTGGTATTGGTACTCTTGTTGAGGAGGGAAAGCAAAAAATT…
HS-FS-000016-I-01_63_359	ATGCCACCTAAAGTAAAGATAACAAAAGAAATGATTTTGAATACAGTCTTGGATATTACAAGAGAAGTGGGATTTGAAGCTGTAAATGCGAGGAGTATTGCAAGTAAATTACAGTGTTCCACTCGACCAATTTTTACTTGTTACGAAAACATGAATGAATTAAAAAATGAATTTCTTGCTTTTGCATATGAATATTATAATCAGTATGTTGTTAATTATCGTAATTCTAAAAGTGTAAGCCCTTATTTACTGCTTCCGCTTTCATACATTGAATTTGCTCAAGAAGAAACGTATTTATTTAAGTTGTTATTTATAAATGATTTAGATTTGATGATGAAAGAGGCGAATGATTTTTATAAAGAAATTGACAATGAAAAAAAGGCAAGACTTTTTTCGGAA…
HS-FS-000016-I-01_72_96	ATGAATGAAGAATTAAGTTCACTAAGATTTGATGGTGTTGGAAAATGTAAAGGTGGAATTTTTGATAATGTTAATATATCAGGAACAGGCAAAATAGAAGGAAGTGTAAAATGTAGTAAATTTGATTCTTCTGGTTCAGCAAAAGTTTTTGGGACAACAGAATGTAATGAATTTTTTACATCTGGTTTAAGTAAAGTAGAAGGAAACATACTGGCATCAAAAGTTGAGATATCGGGACTTCTTAGATGTACAGGAAATATTAATTCTGTTGAAATTGATACTAGTGGAATTATTAATGTAGAAGGAAGTATAAAATCGGATATTATTCATGGAGAAGGATATTTAAAAGCAAATGAGAATATAGATTGTGAAAATATCAATTTAAGTGGAATCTTGGAG…
HS-FS-000016-I-01_67_135	TTGTTTGGGGGGATTAATATAAAAAGAATAGGTATTATTATAATGTTTTTTTTAAGTATAGCTTTTATTGGATTTTATCTTGCAATAAGAGGTAACAGTGATACAGTTAAGATGCAACGAGGGATAAATATAGGTAATGCACTAGAATCACCTAAGGATTTTCCGTGGGATGTAAAAATGTCAAATAAGTTTTTTGATGATATAAAAGATGCAGGTTTTGACACAGTACGTATACCAGTAAGGTTTTCTGATTATACGTCAGATTCTGATAATTTTAAAATTGATGAAGAATTTTTTAAAAAGATTGATAAATATGTAGATTATGCATTGGATAAAGACTTAATAGTTGTGTTGGATTTACATCATTTTGAAGAAATTATGAAAGAACCAAGAGTTCAT…
HS-FS-000016-I-01_68_72	ATGGAAGTATATGCTTTGGTTGGGTCAAGTGGCACAGGGAAGAGCTTTAAGGCTTTAGAGTTCGCATATGAAAATGATATAGAATATATAATCGATGATGGGATTTTAATATACAAAAACAAGGTTTTAGCTGGGATATCGGCAAAACAAGCAAATACTACTATAGAAGCAGTTAAAAGGGCTATTTTTTATAATCTGGAGCATAGACAAGAAGTTAGAGAAGCAATTAAAAAAGAAAATATAAGAAAAATTCTTATTATTGGGACATCAAAAAAAATGGTTAATCAAATTGTAGAGAGATTGTCAATTGGAAGGGTCTGTAAGTTTATAAATATACAAGATATAAGTACTAAATATGAAATAGAAATAGCAAAACAAGCTAGAAAAGAAGGAAATCAT…
HS-FS-000016-I-01_73_18	TTGAAAACAAGTGATTTTAAATTTGACTTACCACAGGAACTTATAGCTCAAGTTCCTATAGAAGATAGAGCTAGCTCAAGATTGATGGTATTAGATAAAGAGACAGGTAATATTGAACATAAAGTATTTAGAGATATAATAGAATATTTAAATCCAGGAGATTGTTTAGTATTAAATAATACTAGAGTTATACCAGCTAGATTAATAGGAGAGAAGCTTGAAACTGGAGGTAAAATAGAGTTTTTATTATTAAAAAGAACAGAGGAAGATACTTGGCAGGCTTTAGTAAAACCAGGAAAAAGAGCAAAAGTAGGGACTAAATTTTCTTTTGGAAATGGAAAGCTAATTGGAGAAGTTGTAGATTTATCAGATGAAGGTTCAAGAATTATAAAATTCCTT…
ERR251831_ST1_519_2	ATGAGTGCTAAAACAAAAACAAAAACTAACATATTATTACTTTTATTAGTAGTAGCTCTTATTATATTCCCATTACTTGTCAACTCAGGTGCTGAATATGGAGGAGCAGATGGTCAAGCTGAAAGTGAAATTACTAAGATAAATCCAAATTACAAACCATGGTTTAGCAGTCCATATGAGCCACCAAGTGGAGAAATAGAAAGTTTATTATTCTCTGCACAAGCAGCTTTAGGGGCTGGTGTAATAGGATACATATTAGGTCTTCAAAAAGGAAAGAGAAGTTAA
ERR348068_ST1_78_25	ATGAATATGAAATACCAACATATAATAGAAGTTGACAAAGAACTTTGCATTGGATGTGGGCTTTGTAAAAATGATTGTCCAGTAAACAATATAATTATAGAAAATAAAAAGTCAGTAATTAAAAAACAAGATTGTCTAATGTGTGGACATTGTGCAGCAATATGTCCCACAAAAGCTATTACCTTGACAGGATTTGATGAACCTCCTATAGAACTTACAAATAAGCCAAAGCTAGATTCAGATGAATTACTAATGGCAATTAAATCTAGAAGAAGTATACGTAAATTTAAAGACAAAGAAGTTTCTTCAGAAATTGTAAAGCAAATTATTGAGTCATGTAGGTATACCCCTAGTGCTAAAAATTCACAAGATGTATCATATATTGTTTTAGACAATAAA…
NODE_29_length_38075_cov_72.8974_8	ATGACAGGGATAATTATAGCCACACATGGAAATATGGCTAAAGCAATGTTAGAAAGTGCTGAATTAATAGTAGGCAAACAGGAAAATGTAGAAACTTTAGGATTAAACCATGGTGACAGCATAGATGAGTTTAGTAGAAGGTTAGAAGATAGAATTGAGAAATATAAGGATGAAGGGGTTTTAGTATTGCTTGATTTTTATGGCGGGGCTCCATTTAATACATCTGCTATTATAATAAATAAATTTGCTAAGGTATGTGAGTTAGAATGTTTGACAGGTGTAAATTTACCTATGCTTTTAGAGCTATTTTTAAACAGAGATACTATGAAGTTAAAAGACTTGAAGAATTTATGTGAGGAAGTTGGGATATCAGGAATCAAAGATGTTAAAACTGTTTTA…
FN538970.1_1140	ATGATATTTGAAGGATTGTCTGATAAACTACAAGGGGCATTTAGTAAGTTAAAATCTAAAGGAAAACTTACAGAAGTAGATGTAAAAAATGCTATGAGAGAAGTTAAACTTGCTCTTCTTGAGGCAGATGTTAACTTTAAAGTAGTTAAAGATTTCATAAAAAAAGTTCAAGAGAGATGTGTTGGACAAGAAGTTATGCAAAGCTTAACTCCAGCTCAGCATGTAATCAAAATTGTAAATGAAGAGCTTACAAGTTTAATGGGAGATGTACAAAGTAAAGTAATGATTTCCTCAAAGCCTCCTACAATTTTAATGATGGTTGGATTGCAAGGTGCAGGTAAGACTACTACAGCAGGAAAACTTGGAGGATATTTTAAAAAGCAAGGTAAAAAACCTCTA…
ERR026357_ST1_817_10	ATGAATAAAATAGCAGTAAGTTTTTTAATAATTGCTACTACTTTATTGAGTACGGCATGTATGGATTATAGCATCAGTGCAGTTGAGCTAGTTGATTCTAAAGAATCAGCAGTTGTAAAGAAGGATGAAGATGCAAAAGAAGAAACAACTAGTAAAATGATTAATTCTAAAAAAACTACTAAAATACCTATAGAGATAATTTCAAAGGATGAGAAAATAGTAAAGTACTTACAGATTGATGAAGAAAGTTCACTTAAGGATAAACTGCGATTAATCTTAGATACATTATCAAATGAGTATTTTAATGGTTTAGACATGGAAGTAGAAGTTAAGGAAAAAGATAATCTTGTTAAAATAAACTTGATAGAACCAGATAAAAAAAGTAGAGTTTCTTGGAAA…
ERR025343_ST1_132_57	ATGTCAAGAAGAAAGAAAGGGATAAGTTTAGTAATATTAGTTGCTATAATAAGTTCAATACTTAGTAGTTTTCTAACAATAATTTTAGTTAAGGACAATTTAGTAAGCAAATCTACAGGAAGTTCTACGCCGATAGTTGTAAATGATGATGGTAAGAGTCAAAATATTTATCAAGCAGTTGCAGAAAAAGCTACGCCATCTGTTGTAGGTATTACAACAACTAGTGTTGATACTAGTAATATGTTTGCAATACCAACTGAAACACAAGGTGTAGGAACTGGAATCATAGTTGATTTAAATGGATATATACTTACTAATTCTCATGTTATATCAGATGGTCAAGCTACAAGTGTAAATGTATTATTCAATGATGGTTCAACAACTTCAGGTAAAGTAGTA…
NODE_10_length_134526_cov_56.3615_52	ATGAAAATAGCTATAGCTGGGACGGGATATGTAGGTTTGGTTACAGGTGTTTGTCTAGCAGAGGTAGGCAATGAAAATGTAGTCTGTGTTGATGTAGATGAACAAAAAGTTAAATCAATGAAACTTGGAATAGCACCTATATATGAAGAAGGCCTAGAAGAACTTATGGTTAAAAATTACAACAGAGGAAGAATAGATTACACTACAGACTATAAAAAAGCTTATGAAGATGTAGATGTAATATTAATAGCTGTAGGTACACCTGAGAGAAGTGATGGCTCAGCCAACCTAGATTATATAAAGGCAGTTGCAAAGCAAATAGCTGAAACTGTGACAAAAGATACTCTAGTAGTAATAAAATCTACAGTTCCAATTGGTACAAATGAAGAGATAGAAGAT…
HS-FS-000020-I-01_73_25	ATGAAAAGTACATTGGGGGTAGAAAATAATATGAAGAATAGTAAAAAGATATTAGCTATAGGACTTACACTATTTTTAGTAATGGTAAATACTCCTATGGTAAATGCGTTGACATCAGTTGAGCAAATAAAAGGGAATGACAGATATGAGACAGCAGCAAAAATAGCAGATAAGCAAAACTACAATACAGCAATACTAATCAACTCAGATAATAGCTTAGCAGATGGTCTAAGTGCAAGTGGTTTAGCTGGAGCCTTAAATGCGCCTATTTTAATGACAAAGCAAAATCAGATTCCAAACACAACTATGGAAAGATTAAACAAAGCAAAGACTGTGTATATAATAGGCTCAGAATCAACAATAAGTAAAAATGTTGAGAATCAGTTATTATCCAAAAAG…
HS-FS-000016-I-01_77_93	ATGAAAATATCTATTGGATGTGACCATGGTGGTTATGAATTAAAGGAATATATAAAGGAAAATTTAATAAATAAAGGTATAGAAGTTGAAGATGTGGGTACAAATTCAAAAGAAAGTGTAGATTTTCCAATATATGCAAAAAAGGTAAGTCAAAATGTTCAAAGTAAAAAATCTGATTTAGGCATACTTTGTTGTGGAACAGGAATAGGCATGTCTATTGCAGCAAATAAGTTTAAAGGAATCAGAGCAGCTGTTGTTTCTGACTGTTTTTCAGCTAAGGCAACTAGAGAACACAATAATACAAATGTACTTTGTTTAGGAGAAAGAGTTATTGGGAAAGGATTAGCAATGAGAATTGTTGAAGAATGGTTAAATTCAAGTTATAATGGAGAAAGACAT…
HS-FS-000016-I-01_86_3	ATGGATTTTAAAAATTTACAGTATGAAAGTTTGTCATATATTATTTGTAACTTGCAAAAAAACTTTAAACTTTATTGTGAAAAATGTTTAAAACCATATAAACTTACGAATGGTCTATATTTCTATTTAATTTATATTAATAAAAATAGGAATTGTTCTTTGAATGATGTTTCTACAGAATTTGAAGTTGATAAAGCTCATACAACAAGAACTATATCTAGGTTAGAACAAGATGGATACATAGAAAAAATCCAAAACCCTAATGATAGTAGAGCTTTTCAGTTGAGAGTAACAGATAAGGGTGAGGAAGTATTAGGGGATATAAAAAACATATTTTCAAAGTGGGATAACCACATAAAAAAAGAGTTCTCAGATACAGAATATAAAGAACTGGTAAAG…
HS-FS-000016-I-01_71_77	ATGAGACCATCATGGGATGAATACTTCATGGAAATTGCAGAAGTAGTGAAAAAGCGTTCAACTTGTATTAGAAGACAAGTAGGAGCTGTAATTGTAAGAGACAAACAAATATTAACAACTGGATATAATGGTTCTCCGAGAAATCTTGAACACTGTGAAAATATTGGATGTAAGAGGCAGGAATTAAATATTCCCTCAGGAGAAAGGCATGAATTATGCAGAGCATTACATGCTGAACAAAATGCGATAATACAAGCTGCTCATAATGGTATTAGTGTAGATGGGGCAACTTTGTATGTTACTACAAGACCTTGTGTTTTGTGTGCAAAAATGTGCATAAATGCAGGTATATTGAAAATTGTTTATGAAGGTGATTATCCAGATGATATGTCTACAGAA…
HS-FS-000016-I-01_63_405	ATGAGTAAAATATATATTGTTTATTGGAGTGGAACAGGAAATACTGAAAAAATGGCAAATTTTGTGGCTGAAGGTGTGAAGTTAAAAGGTAAGACACCAGAAGTTTTAGATGTGAGCTTACTGAAACCAAGTGATTTAAAAGAAGAAGATAAATTTGCATTAGGTTGCCCATCTATGGGAGCAGAGCAACTAGAAGAGGGGTATATGGAGCCATTTGTTTCAGAATTAGAATCTATGGTATCAGGTAAACAGATTGGATTATTTGGTTCATATGGATGGGGAAATTGTGAATGGATGAGAGACTGGGAAGAACGTATGCAAAATGCTGGTGCTACAATTATTGGTGGAGAAGGAATTACAGCAATGGAAGACCCAAATGAAGAAGCAAAAGATGAGTGT…
HS-FS-000016-I-01_68_124	ATGATTACAGACTTAAAAGTTATAATATATGAAGAAAAAAATATAATTAGTAAGATGATGGAATTATTAAAAGAACAATTTGATTATATAGTTGAAAAAGACTTAGAAAATTTAAATATGTTAAATCCTAAACTAGAAGATATTAGCAGGGAGCTTGCATCCATAGAAATAAAGAGAAGACAACTTTTTGGTGATGATATTTCAATGAGTGAAGTTGTTGAAAATAGTAATGATAGATATTTAAAAGAAATATATACAGACTTGAAACACATTCTTGCTTTAGCTAAAAATCAACAAGAATCAAATGATTCTCTAATAAAGAAAGAACTTATTTTTACGAAAAAAATGATTAATTTCATAAAACCAGCTGATAAGCAAACTGCAACTTATAATTCTTAT…
HS-FS-000016-I-01_65_152	ATGGATACTTTAGGAGAAAGAATTGTTTATTTGAGAAAAGCAAAAAACCTTAAACAATATGAACTAGAAGAAATGTTAGGCTGTGACAACTTAAGTAAATTTGAGAGAAACATTAGAAAACCAAATTATGAAATATTAAAATCTATAGCTGAGATATTTAATGTTTCAGTAGACTGGCTATTAAATGGAGATAATCTATCACATAAATCAGATTTAATTTGCGATTCCTCCTCAAACTATCCACTTAATAGCATAAACTCTAATGAAATAAAGCTTTTAAACAACTTTAGAAAGTTAAATGATTATGATAAAGCCAAAATAGAAGGTATGATTGAATTAAAACTTCATGAATATGAAAAAGAGAAGGATTTAGGAAAAATTGAGTATAACAAAAATAAA…
HS-FS-000016-I-01_65_70	ATGAGAGCAACAGGTTCGATACAAAGTCTTATGGAAACAACTCTTGAAACAATTAAAGGTTCTATAGATGCAAATACTATTATAGGAGACCCTATAAAAACAGATACTACAGTGGTTGTACCTATATCAAAGGTTACAATTGGCTTTGGTATAGGAGGAGGAGAATACTCAAAAGGATATGATGATAAAGATAGGGAAATTGAATTAAAAAATGAAAAATCAGATACGAATTTTGCTGGAGGTAGCGCAGGGGCTATATCTGTACAACCAGTAGCATTTGTAGTAGTTGAAAGTGGAGAGACTAGAATAATGAGTTTAGACAGTAATATCAATCTAGTGGATAATATATTATCTATAACTCCTAGAGTATTGGAGAAAATTCAAAATATATCACAAAGT…
HS-FS-000016-I-01_65_84	ATGGCATCATATAATAGAACAAGAAGGATAGCAGAAGAAATAAGAAAAGTCGTAAGTACTATGCTTATAAATGGAGTAAAAGACCCTAGAATAACATCTATGGTGAGTGTAACTGATGTAGAAGTTACAAATGACCTAAGATATGCTTATGTATATGTAAGTATTCTAGGTGGAGATGAAGAATCCACACTAACAGGTCTTAAAAGTGCTGGAGGATATATAAGAAGAGAAGTAGGAAAAAATATAAAACTTAGATATATTCCTGAGATAGTATTTAAACTTGATGATTCAATAGAAAAAGGAATGTATATGGATAACCTTATAAAAAGAGTTAATGAAAAAAATGCTCAACAAAATGAGGATGAAAATTATGATGAATAA
HS-FS-000016-I-01_80_12	ATGGCAAGAATAGCTGGGGTAGATTTACCTAGAGAAAAAAGAGCGGAGATAGGCTTAACTTATATATATGGTATAGGTAAAGCAACTGCTAACGAAATATTAGCTAAGGCTGAGATAAATCCAGATACTAGAATAAAAGATTTATCAGAAGATCAAGTTAATGAGTTAAGAAAAGTTATAGATGACGATTTCTTAGTTGAAGGTGACTTAAGAAGAGAAATTGCTTTAAACATAAAGAGATTAAGAGATATAAAATGTTATAGAGGAATAAGACACGCTAAAGGTCTTCCATTAAGAGGACAAAGAACTAAGACTAATGCTAGAACTAGAAAAGGTCCTAGAAAAACAGTATCTCGTAAAAAGAAAAAATAA
HS-FS-000016-I-01_71_88	ATGAATATATTTGATATTGGCGTAGATATAATTGAAATTGATAGAATAAGAAAGGCTGTAGACAAAAATAATAGGTTTTTGGAGAAGATATTTACAGATAGAGAAATAGAGTATTTTAATTCTAAGAATTTTAAAGCAGAAAGTATAGCAGGTAATTTCGCAGCCAAGGAAGCTATAAGTAAATCTATAGGTACAGGAATTAGATTGTTTAATTTTAAAGATATAGAAGTTCTCAGAAATGAAATGGGAAAACCAATAGTAAAAACTTATAATAATCTAGCAAAAATGTGCATAGATTATAATGTTTTAGAAATAAAAGTTTCAATATCACATTCAAAAGATTATGCTATAGCAAATGCGATAACCATAATTAAGGACTAA
HS-FS-000016-I-01_63_328	ATGAAATTAAAATTATTGGTAGAAGAGTATGCAGTATGTAGATTAAATAATGACAGTAAAATACCAACATGGATAGATACAGAGAAGTTTTACTCTATAACTAGAACTGATGATGAATTAAGTGTTGTATGTTTAAATAATAATATTCCTTCTGATGTTAAGTCAGAAAAGGAGTGGAGAATACTTAAGATACTAGGTCCTTTAGACTTTTCACTTGTAGGAATTTTATCTAAGTTAAGTAGTTTGTTAGCAGACAACAAAATAAGCATATTTGCAATTTCTACGTATGATACAGACTATATCTTAGTAAAAGAAAAAGATATAGAAGATGCTTGTAAAATTTTAAGCTGTAATGGATATGAAGTAGAGTAG
HS-FS-000016-I-01_77_74	TTGAGTTGGCAAGAATTGTATCAAAGTAAATTATGTAGTGCTACAGAAGCTGTAAAACAGATTAAAAACGGTGATACTGTAGTATTTGCACATTGTGTAGGTGAACCTCCTGCACTAGTAGAGGCTATGATTGAAAATGCTGAACAATATAAAGATGTTGAGATTAAACATATGGTAAGCTTGGGTAGTGGTGGATATACTGCTAAGGGAATGGAAGCTCATTTTAGAGTAAATCCAATGTTTGTAAGTGGAAATGTAAGAAAGGCAATTGAAAATGGAGATGGTGATTTTACACCTGCATTCTTCCATGAAGTACCAAAGTTGCTTAGAGAAAAAAGATTAAAATGTGATGTTGTTTTAGCACAGGTAACTCCACCAGATGAACATGGGTATTGTAGC…
HS-FS-000016-I-01_76_16	ATGAAACTCTTAACTTTTAAGGGAGGGATACATCCTCCATATAGAAAAGAGTACTCTAACACAAAGGCACTTGAAAAAGCTCAAGCTCCAAAGATAGTTTACATTCCTCTTCAGCAACATATAGGGGCACCAGCTAAACCTATTGTTGAAGTTGGTGATGAAGTAAAGTTTGGGCAAAAAATAGGTGAACAACAAGGTTTTGTTTCATGTAACGTTCATTCTTCAGTATCAGGTAAAGTTATTGCTATTGAACAACATGAAGTACCAGGAGGTTCAGCTCAATGTGTAGTTATCGAAAATGACTTTAAGGAAGAATTACATGAGAGTGTTCAACCAAAAGGTCAGTTAGAGGATTTGAGCAAAGAAGATATAGTAGGTATCATAAAAGAGGCAGGAATA…
HS-FS-000016-I-01_74_41	ATGAGTATTATCGCACCAATTGGTATAATTATTGGTATCATAGCTATTATATATTTTTCAGTTAAAGAAATTCATATAACTATAGCTGCTCCAATAGCAACTTTAATAGTTGTTCTCTTAAATAAAATGGATGTTGTAACATCAATGCTAGGTGCTGACAAAAACAATTATATGGGTGCACTTGGAAACTATATAATGAGTTATTTTGCAATATTCTTATTAGGCTCAATACTTGCTAAATTTATGGAAGAAAGTGGAGCCACTGTATCAATAGCTGATTTTATTTTAAATAAAGTTGGCTCTAATCATCCTTATAGAGTTTTAGTTGCTATATTTATAGTAAGTTTTATATTAACGTATGGTGGTATAAGCTTATTTGTAGTTATGTTTGCAGTCATT…
HS-FS-000016-I-01_63_367	ATGAAAGAGCAAATTAAAGAAAAAGTAAATTCTCTACAAGATGAAATGATTTCTTCAATACAAGAAAGTGTAAAAATACCTAGTGTTATATCTGAAGCAACTGAAAATTGCCCATTTGGTGAAAATGTAGATAAAGCTTTAAGAGGTATATTAGACTTATGTAAATCTTTAGGATTTAAGACAGTATACAAAGATGGATATTATGGATATGCAGAAATAGGACAAGGTGAAAAAATGATAGGTATACTTGGTCACGTTGATGTGGTTCCAGAAGGTGATTTAGAAAGCTGGAATTACCCTCCATTTGAAGCTGTTTTAGAAGATGGTAAATTGTATGGAAGAGGAACACAAGATGATAAAGGACCTACAATATCAGCAATTTATGCAGTGAAAGCTCTT…
HS-FS-000016-I-01_67_36	TTGATAAGTTTTATAAGGGGATACTATGTTATAGTTGTGGAAGGAGTAGGACTCGAACAATTTTTAAATCATCTTATAAGAAATGGGATAAGTGTTTACAATGTAACTAGAATAAAAAATACTAAAATGGAGTTTCATATAGATAGACAAGATATAAAAGAATTTAAGAATGTTTATAGAGGAAGTAAGTTTGATATAAAGGTAAAGCAAAAAACTGGGGTCCCTTTTATTATCAAAAGAGTTTATAAGCACAAAGGTATGTGGATTTGTGCTCTTGTTTCTTTATTTTTATTGATGTCTACATCGCAGTTTGTGACAGATGTATATATACAATCTCCTGAAGGTATAAAAAAAGAAGCTCTTAGAAATGAGCTTTATAAGGTTGGAGTAAGACCAGGA…
HS-FS-000016-I-01_79_61	ATGATAGAGATAAGAAATGTAACAAAAAAAATAGGAAATAATGTTATATTAGATGATATTTCTCTAGTTGTAGAAACAGGTACATTGGTAGTTTTGATTGGTTCAAGTGGTTGTGGAAAGACTACTACTTTGAAGCTTATAAACAAATTAATAAAACCTACATCTGGTGAGATATATATTAATGGCAAACCAATTTCTCAGGAAAATGAAATAGAGCTTAGAAGAAAAATAGGATATGTTATACAGAACACAGGCCTATTCCCTCATCTTACAATAAAAGAAAATATAGAGCTAATTCCACGCCTAAAAAAGGAAAAATCCGTTGAAGAAATTGAAAAAAGAACGTTGCAACTACTTGAGATGGTAGGACTTGATAGTGATGAATTTTTGAATAAGTAT…
HS-FS-000016-I-01_85_25	ATGGATAAAATAAGTAATATGTCATTAAAAAAAGCTTTCTTTGTTCTTACTTTATCTTCACTAATTATAGCATCAGTACTTACTACTTTCGCATACATTTTACTTAATAATCTATATAATTCTATACAAGATAAGTATTTAAAAACACCTATAAATACAGGTATTATAACCATAGTTCAAAACAATGTGAACCAATTTAGTGATTATGATAAAACATTACTTAATATAATCAACATACTTCAGCTTGTACTTCCACTTATATTTTTTATAGGACTTTTATTATTAGCTGATATAATTTTTTACAAGGTAAAATTAAAAACACCCATAGAAATCCTCAATAAAGGTGCAATGGAAATATCCAACAACAATTTAGATTTTTGCTTAGAATATAATAATAAT…
HS-FS-000016-I-01_74_45	ATGAAAGATGTAGTAATCGTATCAGCAGTCAGAACACCTATAGGAAGTTTTGGAGGTGTATTTAAAAATACTTCAGCTGTTCAACTTGGAACTATCGCTGTTAAAGAAGCGATATCACGTGTAGGACTTAATTTATCTGAAATAGATGAAGTAATAATTGGAAATGTTCTTCAAACAGGGCTTGGACAGAATGTTGCTAGGCAAATTGCTATAAATTCAGGTATACCAAATTCTGTTCCAAGCTACACAGTAAATAAATTATGTGGTTCAGGGCTTAAAAGTGTTCAGCTAGCTGCCCAATCAATCACATCTGGTGAAAATGATGTGGTAATTGCAGGTGGTACTGAAAATATGAGCCAAGCTCCTTATATCGTTCCAACTGCTCGCTTTGGTAGTAAA…
HS-FS-000016-I-01_67_79	ATGTATAATTTTGATGATAAACCAGATAGAGTAAGTGAAAAGTGTAGAAAATGGGATTTAAATATTATAAGAGATAAATTTGGAGATATTAGAGAAGATTTTGTACCAATGTGGATTGCTGATATGGATTTTAAAATACCAACAGAAATAGAAAACAAATTTATTGAAGCTGTAAGAAGAGGTGTATTTGGATATACATACTGTTATGATGAATTTTATGATTCAGTTATTGGTTGGCAAAAAAATATGCATGAGGTAAATGTAGAAAAAGAATGGATTACATTAACTTATGGAACTGTATCAACACTTCATTATGTAGTACAAGCTTTTTGTAAGAAAGGTGATAGTATAATATTAAACACACCAGTTTATGACCCCTTTGAATCATCAGCAAAAAAA…
HS-FS-000016-I-01_76_47	ATGAAAAAAAATAAAATTATTGCTTTTTTTGCTCCAGCTATTATAGTTGGAGTTCTAGTTTTAGGGATTATCCTATACCCAAATGAAGCTATAAAATCTGCAAGAGAAGGCTTCTCTATATGGTCTAATGTTTTAGTTCCATCACTACTACCATTTATAATTGGAGCAAACTTAATTGTTGATTTAAAAATAGTGGATATTATAGGGTTTATCATCAATCCCATAACTAGATTTGTATTTAATGTTTCAGGAAAGAGCGCTTTAGCTTTTGCTATATCTACAGTATCTGGTTATCCAGTAGGAGTAAGTTTAGCTTCTGAATTTAGGAGTAATGGGCAAATTTCTAAGCATGAAGCACAAAGACTTGTGTCTTTTTGTTCTACATCAGGACCTTTATTC…
HS-FS-000016-I-01_63_332	TTGATAAAAAAAATACTAGTTGCAAATAGAGGCGATATAGCAGTTAGAATCATCAGAACATGTAAAGAACTAGGTATAAAAACTGTTGCTATCTATTCTGAAATAGATAAAGATTGTTTTCATAGATATATAGCTGATGAATCTATTTGTATAGGACCAAATAATATAAGTAAGAGTTATAATAATATAGAAAATATAATCTATCTTGCTCTTAAATTAAAGTGTGATGCTATTCATCCAGGCTTTGGATTCTTATCAGAGAATCCTGAATTTGCAAAGCAATGTGAAGATAATAATATTATTTTTATAGGTCCAACAAGAGAACAAATGATTTTGATGGGAGATAAATCTAGAGCAAGAGAAACTATGATGGAATTGAATATCCCTGTTGTTCCTGGT…
HS-FS-000016-I-01_63_554	TTGCCAATGAGCGAGATAACTAGTCAAATGATAAGTACAGAAGAAAAAAAATATGTTGCTAAAACTCAAAAGATACCTTATTATCCAGTAGCATTTAAATCAGGTGATGGTGCAATGCTATATGATTATGAAGGTAATGAATATGTAGATTTTTTAGCAAGTGCAGGCTCTGCAAATGTAGGTCATGGTAATAAGGAAATCTCACAAGCAGTTAAAGAACAAATGGATGATATAACACAATATACACTTGCATATTTCCATAGTGATCCTCCTGTAAAATTAGCTGAGAAGCTTGTGGAAATAGCCCCTGGAGATAATGATAAAAAAGTACTATACAGTGCAACTGGTTCTGCTTGTATAGATGCTGCTATAAAATTAGCAAGAGGGTATACTGGAAGA…
HS-FS-000016-I-01_71_130	ATGTTTTCAAAATTTGAAGCATTTATGAATAGAGTATTTATGCCTTTAGCTCATAAGGTTGACAATCAACGTCACCTTGGTTCTATAAAGGCTGGTATGGTTGCTATGACACCATTCACAATATTAGGAAGTATATTTGCAATACTTCCAGCACTTCCAAATATGCTTGGAGAAAATAATCCAATAAGCAAATTCATACTTAACAATTCAGCAATATTGGATTTACCAGTAAGTCTTTCCATAGGTTTAATAGGATTATATGCTTGTATGTGTATTGCTTTTAATCTGGGGAACTACTATAAATTATATATACCAGGTTGTGTTGCACTATCAACTTTTTCTTTTTTATTCCTAGTAGCCTCATTTACACCAGATGGAGCTTTAGAAATAGGAAATTTA…
HS-FS-000016-I-01_67_170	ATGGATGCAAGAGAAGTTGGATTTAAAGTATTATGTGATATAGAAAAAAATGACAATTATTCAAATATTGCAATAAATAAGCATTTTAAAAATTTAGAAATAAGTGATATGGATAGAGGACTTGCAACAGAGTTAATTTATGGAGTAATAGAAAATAAATATTATTTAGATTATATAATCAATAAACTTTCAAAAATAAAGGTAAAAAAAATGTCAACTTATGTTAAAATCTTTTTAAGAATGGGAACATATCAGATTTTATTTTTAGATAGTATATCAGATTATGCAGCAGTTAATGAAACTGTAAAATTATCTAAGAAATATGATAAAAAATCTTCTGGTTTCATAAATGCTATTCTTAGAAATGAAATAAGAGCTAAAGAGACTATAATGGACATA…
HS-FS-000016-I-01_65_262	ATGGCTACATTTATTATAGCAGCTATTGTAGTAGTATTAATGGCACTAGCTGTAATGTATATGGTTAAAAATTCAAAAAAGAATGGTAGCAGTTGTGGATGTGGTTGTTCTGGATGCTCAAGTAGTAAGAGTTGTCATAGCGCTAAGAGATAA
HS-FS-000016-I-01_63_518	ATGGATATGGATTTACTCTTTAAAATAGTATTTGCTATAGTTGCTATAGGTGTTTCTGTAAAAATCATTAAAACTGTTGCTAGTTTAGCTTTTAAAATAGCGTTGATATTGCTAATAATTTTATTTGTATATAGAATGTTTTTGTAA
HS-FS-000016-I-01_63_395	ATGTTTGGTAAACCAAAAGAAAGTGTTAGATTTTTAGACTTTAATGATGTAGCAGAAAAGTTTGGAGAGAAAAAGGCTGTTGCAATTTTTGATGCCATAGCTGGAAAAAAATCTAAAGAACATATTATCAAAGATATAGAAAAATTAGTAAAAAATGAAGTTTAG
HS-FS-000016-I-01_84_2	ATGAAAAAGATAAAAAAACTGATTATTCTAATTGTATTCTTGTTTCTTTTTGGCATGTTACACTGTTATACTGAATGGAAATTCAACAATGACCCACCTAAAGGGGTAATAGAAAGAATAAATGAGTGGACTGATAAGATTGGACTGGATTAG
HS-FS-000016-I-01_82_73	ATGAATGCATGGGGGTGGCAAATTGGAGCAGTGTTAGTAGGAAGCTCTGCTCTTATAGTAGCAATTTATTTAGCTAAAACTCTAAACAGCATAAATAAGGTTGTTGAAAAGGCATATAAGATTGTAGATTATAATGAAAGACATATACAAGATATTGTTGAAAATGCATCATCAATATCAAAGGGAATAGATGATATAGTTTATGTAATTAATAAAATATTGAGTATAGGAAATATATTTAAAATTATTAAAAGGAAATAG
HS-FS-000016-I-01_81_40	ATGACAAAATTAGAAGACAATATGGAACGTTTCTTTGGAGGATGCGAAGGATTTTTTGGTAATAAAATGTTGATAATAATAGTTATAGTATTCTTACTATTATGCACAGACATTTTAGAAGACTTATTATGCGATGACAATATATGGATATGGGTTATATTAATAGTATTGTTATTATTTAACTTCGATGATGGTTGTTGTTGCTAA
HS-FS-000016-I-01_75_91	ATGGGCGAAAATTATAAGTTTTTTAATCACAAAGATTGCGAATTTTTCCCTTGTCATAAAACTAATAAACCAGAAGAGTTTAACTGTCTATTTTGCTATTGTCCTTTGTATGCTTTAGGAGAAAACTGTGGTGGAAACTTTAAGTATACAGATAAAGGTATCAAAGATTGCAGTAGTTGCATGTTACCTCACAAAAAAGATAATTACAATTACATTATGGGCAAATTTCAAGATTTAGTTAAAATCACTAGTAAAAAGTAA
HS-FS-000016-I-01_63_686	ATGACTAAATATGATTTTAATTTCAAATTAAAAGTAGCTAAATTTTATTTGAATAGAGAAGGAAGAGATATTTTAATAGTAAAACAATATGGAGTTTATGACCATTCTCAAGTTGAAAGATGGGTTAATATATTAGGAGAGGGTGCACTAAAAATAAAAAAGTTTTCTATACTATATGGTTCAAGTTAG
HS-FS-000016-I-01_63_166	ATGGAAAGATTAATGGAACTCATAGAAAGAAAATTTTTAAAGGATGTAGAACTTTTAGAATTAGAAGACATAGAAAATGTAATAGAATGCAAAATGACACAGCCATATAATGCTCATTATAATGAATACTTAGTAAAAGTAAAAAATGGAGATGAAGTAGAAGAATATTTTGTGTATTTAAAACATAGATAA
HS-FS-000016-I-01_72_33	ATGAAAAAATTAAAAACAATTAGCATTTTTTCTTTGATTATAAGTGTAATTTTAACGATTGGAGGTATTGGAATAGTAACTTATTATGTAGATAATTTGTTTATTAGAGGACTATCAGTATTTGTTTTAATTATGTCCTCTTCTTTTGTATCAACAACAGTTAGATTGATATTTGAAGAGTCAAAACGATATAAATTCTAA
HS-FS-000016-I-01_66_195	ATGAAAGCATTTGTTGATAAGGATGTATGTGTAGCTTGTGGAGCATGTATAGGAACATGTCCAGACGTTTTTAGTATGAGCGATGAAGGGCATTCAGTAGCAATTGAAGGAGAAATACCAGCAGATTTACAAGATTTATGTAAAGAAGCCGAAGAAGGATGTCCAGTTTCAGCTATAACAGTTAAATAG
HS-FS-000016-I-01_63_399	ATGAACATATCAAGAAGAGCTATGAAGATAATTGAACTGGCACAAAAAATTGCTAATAAAAGAGGTGTAACAGTACAAGACGCTTGGAATGATGCGATGAAAGAATATAAAGAAAAATATGAATATGTTGCATAA
HS-FS-000016-I-01_63_293	ATGGGAATATTAGAAGGCGCTGCAATGATAAGAGAGATTGCAATTAAAATAGCTAAAGAAAAAGGTATTACAGAACAAAAGGCATGGCCCGAAGCTGTAAAAGAATTTAAAGAAAAATATGAACTTGTATTATAA
HS-FS-000016-I-01_71_109	ATGAATCAAAAGATTATAACTAAATTGACTGAAGATATATATAAATCTGCTGAAAATAGAGGTGCAAAATCGGACGTAAGGGAATTGTATTGGCTTAGTCATACAAAAGCTCCAGCGATATTAATTGAAGTATGTTTTGTAGACAGTAAAGCAGATACAGACTATTAA
HS-FS-000016-I-01_77_60	ATGAGTTTACTTAGTAATAAAAAGGTTCTTATAATAGGTGACCGTGATGGTATACCAGGACCTGCGATAGAAGAATGTGTAAAAACAGTAGAAGGAGCAGAGGTTGTTTTCTCATCTACAGAATGCTTTGTCTGA
HS-FS-000016-I-01_64_57	ATGGAATTAATTGAAAAAGTATCTATCAACTCTTTATCAAAAAGAGATTTACTACTTATTATAAAGTCTCTTGAATACACTAATGAAAATACTCAAATTAGTGATTTCATTGACCTTAGGAATAATATAGTAAAGGAATTATGTTTTTTAACTGACACTAAGGAAAAAGATTTTTTAGATTATCTAGAAAAAAATAGCACACTCTAA
HS-FS-000016-I-01_76_73	TTGCAAATTAAAATAATTATTATAGCTCTCTTGGTAGGAAGTAGTTATTTGATAGGTGAACAAATATACAAAACTTATACTCGTAGACATAAACAATTAAACGATTTAATAAGAGTTTTAGAAATTTTGAGGATGGATTTATCTTTCGGACTTTATACATTAGAAGAAATCTTTAATAGGATAGGTGGAAATAAAGAGTTTTGTTTTTGGAAATTTTTCTATCAAATATCAGAAGGACTTCACAATGAACAAAGTAAAACTTTGGAAATAATAATATCAGAAAATATTGATGTCTTAAGTAAAGAAACTTATCTAGGCAATAAAGAAATTGAGGAACTGAAAAATCTAATACTTACTTTAGGGAAAAGCGATATAGAGTCACAACAAAGAATGATAGAT…
HS-FS-000016-I-01_68_43	ATGGAAGATAATACAAAACTAATAGTAGATGATATAAAAATAGAAGAAATGACTACAGAAGATATAGATGAAGTTTTTGAAGTAGAAAAAAATTGTTTTGAAGATTATTGGTCAAAAGAGTCTTTTAGAAAAGAGTTGTCTAATGAAGTAGCAAGGTATATAGTAGCTAAGTTAAATGGAAAAATTGTCGGATATGTGGGAATTTGGCTTATACTTGATGAAGGGCATATAAATAATGTGGCTGTTCATAGTGACTATAGAGGGAAAAAAATAGGGGACAAGTTGATAAAATGCATAGTTGATTTATGTAAAGATAATAATATTGCATCTATGACATTAGAAGTTAGAGCATCAAATAAAATAGCACAAAATTTATATAGAAAATATGGATTTAAAATG…
HS-FS-000016-I-01_80_51	ATGTCAGAATTACAAGAAGCAAGTTGGTATGTAGTTCATACCTATTCGGGACATGAAAATAAAGTTAAAGCTACAATTGAGAAAGCAGTTAAAACAAGAGGTATGGAAGACTGCATAAGACAAGTAGTTGTTCCAACAGAAGAGGTAGTGGAAACTACTAAAACTGGAAAAGAAAAAACTAGACAACGTAAAGTTTATCCAAGTTATGTCTTGGTTAAAATGATAATAACTGATGAATCTTGGTATGTAGTAAGAAATACTAAGGGAGTTACAGGTTTCGTTGGACCTGGTTCAAAACCAGTACCATTAAGTGAAGATGAAGTCAAAGCTATGGGGATAGATACAACAGACCCTAAAGTAGTAAATAGCGATGTTGATTTTGAAATAGGAGACACAGTA…
HS-FS-000016-I-01_71_89	ATGATGGATAAAACAGCAAAAGAAATAATGACAACAGATGTAATAGTAGCAAAACAAGATGATAGTATAGCAGATGTAGCTAATATGCTAATTGCAGAAAAAATAGGAGGTCTGCCAGTTGTAGATTCAGAGAATAGAGTTGTTGGAATAATTTCTGAAACAGATATTCTTAAAAAAGAAAAATATATAGAAGCACCTCTCTATATAAATCTATTACAAGGATTGATTTTCTTAGATGACTTAAAAAAAGTTGAAAAAGATATAAAACAAGTAGCTGCTTATAAGGTTGGAGAACTTATGTCTAAAGATATAATAAAGGTTCATGAAGATGATAAGTTTGATGATGTAGCTAATGTAATGATTAAAAAATCAATAAACAGAGTTCCTGTAGTAGATGAT…
HS-FS-000016-I-01_63_116	ATGAAAATTCGCAACAAAGCTACTAATAAAAAGAAAAAATATGTAAAAATATCTATTGCTCTATTCTTTGTATTTATATGCATTATTATTGTAATTGTAAGCAACTTAAAGCCAGAAAACTTGGTAGTAAAAGATATAGATATTAATAATGTTAAAAATGGCATTTATACTGGAAGTGCTGATAATAACTTGGTAAAAGCTACTGTGTCTGTTGAAGTTAATAATGGTAAAATCCAAAATATTAATATCTTAAAACACGACCATCTTTTAGGTAAACCTGCTGAAAAAATTACAACAAGTATTATTAAACAACAGTCTTTAGATGTGGATGCTATAACTTCTGCAACTTATAGCAGTAATACTATACGAAAAGCTGTAGAAAATGCTTTAAGAAAGGGA…
HS-FS-000016-I-01_67_32	GTGGATAACATAGAATTGTTAAGGTTGGCAGAAGATGCCAGACAACATTCTTATGCTCCTTACTCAGGTTTTAGAGTAGGTGCAGCTCTTTTAACTAAGAGTGGTAAAGTTTATACTGGATGTAATATAGAATGTGCATCATTAGGTGGAACAAATTGTGCAGAAAGAACAGCTATTTTTAAAGCAATATCAGAGGGTGATAAGGATATCTATAAAATAGCTATAGCAAGTGATAACTCAGAAAATAATGAGCAAACATATCCATGTGGAATATGCAGGCAGGTAATTATAGAGTTTGGTTCTGATATAAAAATAATAACGGGATATACTAAAGGAGAGGTGTTTGAGCATAGTATAAAGGATTTGTTGCCAAACTATTTCTCTGGAAATGATTTAAAA…
HS-FS-000016-I-01_68_175	ATGAATTGGCAAGATGCGTTTTTTCAAGATACTAAACCTACATTTGAGCAAATTAATGAATTTATTAATAATCCATTATGGGACAAGTTAAATAAAACTTTGGTTTCTACTTATAATGTAGAACCTAAGCTTGAATACAGTAAATGTTCAATGCAAAGAGGTTGGAATGTAAAATATAAAAAAAGAGGTAAATCACTATGTACTTTATATCCACAAGAAGGTTATTTTAAAGCTTTGGTTATTGTAAGTGAAAGCAATAGAGTAGAGGTTGATTTATTTATTAATACTTGTTGTGATTATATCAAAAAAATATATAATGAGGTAAACTTTTTTAATGGAAGTAAATGGCTAATGATTCAAGTAGATAGTTTATTGGTATTAAACGATATGCTTGAACTA…
HS-FS-000016-I-01_80_61	ATGAAAGTTATAGTAGCTGTAGATTTAAATTGGGGAATTGGTTATGGTGGAAAGTTACTACAGTCGATTCCTGAAGATATGAAATTTTTTAAAGAAAAAACTGTAGGTAATGTAGTTGTAATGGGGAGAGAAACCTTTAAATCATTACCAGGAAAAAAAGCATTAAAAGATAGAGTGAATATAGTCTTGACTAGAAGTAAATCTTTTAATGATGATAGATTGATTGTTTGTAATTCTATAGATGAAACTCTTAAGGAACTACAAAAATATGAAAATGATAAAATTTTTATAATAGGTGGAGAAACAGTATATAAACAATTTTTACCTTATTGTAATGAACTATATGTAACAAAAATACAGAAGACATATGAGGCGGATAGATTTTTCCCTAATATAGAT…
HS-FS-000016-I-01_77_36	ATGGAATTATGGGATTTATATAATGCTGATGGAATTAAAACAGGAAATGTTATAAAAAGAGGTAATTCTATTGAAGAAGGTTATTACCATTTGGCAGTTGAAGTGTGGATTTTAAATAGTAACTCTCAAATTTTAATTCAGAAAAGGTCTAAAAGTAAAAAGACATTGCCAAATATGTGGGGAATGACAACTGGATGTATTGTTTCTGGGGAAGATAGTTTAGAAGGAGCAATTCGCGAAGCAAAGGAAGAAATAGGGATAGATATAACTAAAGATGAGATGAAAGTTTTTAGAAGTATGATTCATGAAGATACTCTTTGGGATGTATACTTAGTTAAAAAAGAATATGATATATCCAAAGCTATTTTACAGGAGGAAGAAGTAAGTGATATAAAGTGG…
HS-FS-000016-I-01_76_11	ATGAAGAAGAAACTATTAGTAGAAGGTATGAGTTGTGGTCATTGTGTAAACCATCTTAAAACTGCATTAACAGAAGATATAGATGGTATTGAAGTTTTAGATGTGGATTTAGAAAATAAGTGTGCATCTGTAGATATGAAAGATGATATATCTATTGAAAAATTAAAAGAAGTGATAGCAGAATTAGGATTTGAACTAAAGGGAATTGAATAG
HS-FS-000016-I-01_63_208	ATGAGTTTAGTATATGATGTTTATAAATCAAAATTAGGAAATTTGTACATATTAAGTGAAGATGGTTTTATAGTTAGTGTATACATAGGAGATGAAAAATTTAATAATTTAAAAAATGAATGTATTAAAAAAGGAATTGATATAAAGATAAGTAAGGAAGATTTAAAGGAAGCAATAAGCCAGATAGATGATTACTTTAATGGAAAAAGAAAAGTCTTTAATTTAAATATTCGTATTGAAGGGACTGAATTTCAAAAATCAGTTTATAGGGAAATGTTAAAAATACCTTATGGAGAAACATTGTGTTATTCAGATATAGCAAGAAATATAAACAATCCAAAATCAGTAAGAGCAATAGGACAAGCAAGTAAAAGTAATAAAATTCCAATAATAATACCT…
HS-FS-000016-I-01_77_13	ATGGGTTTTAGAGAAGTAAAAATTGAGGAACTACAGTTTAATCCATTTACTAAGATTGGCAAAGAATGGTTACTTATAACAGCTGGTGATTCAGAAAAGTTTAACACAATGACTGCTAGCTGGGGTGGTGTTGGAGTCTATTGGGGTAAAAATGTTGTTACAACTTACATAAGACCACAGAGATATACAAAAGAATTTGTAGATAGTAATGATACATTTACAGTTGCCTTCTTTGATGAAACGTATAGAGAGGCTTTAAATATTTGTGGTACTATTTCTGGTAGAGATATAAATAAAATAGAAAAAGCAGGACTTACACCATATTTTGTGGATGATACGGTAGCTTTTGAAGAAGCTAATATGATTATAGTATGTAAAAAGCTATATCATGGTAATATG…
HS-FS-000016-I-01_80_42	ATGCCAAGAAAAGGTAATATTCCAAAAAGAGAAGTTTTACCAGATCCTATGTATGGGAGTAAGGTAGTTACTAAATTAATAAATAATCTAATGGTAGACGGAAAAAAAGGAAAGTCTCAAAGAATAGTTTATGATGCTTTCGCAATTGTTGCTGAAAAGACAGGAGAAGAAGCTTTAGAAGTATTTAATAAAGCAATGGATAATATAATGCCTGTTTTAGAAGTAAAAGCAAGAAGAGTTGGTGGGGCAAATTACCAAGTGCCAATCGAAGTTAGACCTGAAAGAAGACAAACATTAGGTTTAAGATGGCTAGTAAAATATACTAGAGCTCGTGGAGAAAAAGGAATGGTTGAAAAGCTAGCTAAAGAGATAATGGACGCAGCTAACAACACTGGAGCT…
HS-FS-000016-I-01_63_353	TTGAAAAGGGTTGATGAGAGAAATACTATGTTTGCAAGAGCAAATTACAAAAAAGATAGTACTGCTTATAATGATTATTATAAGAAAAATCCTGACAAAAAAGAAATTGATGATAGTATAAGAAATAGACCAAATTTATGTAGTGAAGGAACAATGACTTACAATGAGTTAAACTCTCCAATGGCAAGTAGTGCATTCGATTTTTTATCTGATATCAAATCTTTATGCGAAGGAAAAGTTTCTGATACTAAAGTAGATGTAGATGCAAAGTCAATGACAAAAAAAATTAAGGGTCTTGCAAAGCAGTATGGAGCTTCTGTAGTTGGTATAACTAAATTAAAAGACTATCATATTTATACAAATAGGGGTAGACATGAAGAAAATTACGGTGAAGAAATT…
HS-FS-000016-I-01_63_670	ATGGGAGATAAAATGAGAGCATCAGTATTGTATAATGTAGGTGATGTCAGGTATGAAATGGTAGATATACCAGAAATAACAGATACGCAAGTGCTTGTAAATGTAAAATATGTTGGGATATGTGGTTCAGATTTGCCTAGGTCTATGGTAAGTGGTTTGAGTGGAAATACAAAATATCCATTGATTTTAGGACATGAATTTTCTGGTGAAGTTGTTAAAATTGGAGAAAAAGTAAAGCATATTAATGTAGGAGATAGAGTAGCTGTTGCACCATTAGTACCTTGTGGAAAATGTGATTATTGTAATGAAGGTAATTTTGGCTTGTGTGATGATTACAATATAATTGGAACAAGAGTAAATGGAGCGTTTGCAGAATATGTAAGAGTTCCAGAAGAACAT…
HS-FS-000016-I-01_63_551	ATGACTAAAAATAAGATTAAATACTTTATAGATAAACTTTACAGCATTAATTCATTAAGTTTTGATGAACTACTATATTTAATAGAAAATATCGACAATGAGGAATATAACTTCGAACAAAATTTAAGAAACTATCTTTATAAACAAGCTAGCGACATGAGAAATAAACATTATGGAAATAGAGTCTACTTGAGAGGACTTATAGAGCTTACAAACTATTGTAAAAATAATTGCTACTATTGTGGAATACAATCTTCTAATAAAAATATCATAAGATACAGACTTTCACCTGATGAAATACTTGAATGTTGTGATATAGGTTATAAAATAGGATACAGAACATTCGTTTTGCAAGGTGGTGAAGATGCATATTTTACTGATGATAAAATATGTGAAATT…
HS-FS-000016-I-01_74_6	ATGGCAGTTTTAGTAGCTGGAGGAGCAGGATATATAGGAAGCCATACAGCAATAGAACTTTTAGAATCAGGTTATGAAGTTGTTATAGTTGATAACTTAAGTAATAGCAACTCAATAGTGGTTGATAGAATTAAGGAATTATCTAAAAAACCAGTAAAATTTTATAATATTGATATCAGAAATAAAGATGAAATGCATGTTGTATTTAAAGAAAATAATATTGAATCAATTATACACTTTGCAGCTTTAAAAGCAGTTGGTGAATCAGTAGAAAAACCAATTGAATATTACAGCAATAATCTAATAAGTACCTTAAATTTATTTGAATTAATGAGAGAATATGGTGTTAAAAAGTTTGTATTTAGTTCTTCAGCTACTGTATATGGAGACCCACATACT…
HS-FS-000016-I-01_63_61	ATGAATAATAAAAAAATTGCAGTTATATTTGGTGGAAACTCAACAGAATATGATGTATCATTACAATCAGCTTTTGCAGTACTTGAGAATTTGAATACGGAAAAATATGATATTATACCAATTGGAATTACAAGGGAGGGTAATTGGTATCATTATATTGGAGATTATAATAATATCCAGAATAACACTTGGTTTGAAAGGGATACTGATATAATTCCAGTTATTGTTTCGCAGAACCGTGTCAAAAATGGTATTATTGAATTTTTAATTCCTGATGCTGTTTCTCAGAATCATATTCCAAATAGTGCTATTGAATCATGTGAAAATGATATTAAATACACTAAACTTGATTTTGTATTTCCTGTATTGCATGGAAAAAATGGAGAAGATGGAACAGTG…
HS-FS-000016-I-01_63_19	ATGAAGAAAGCTTTTGAGAAGTTAAATTTAAGAGATTATGGAGTATTATTAGGTTTTTTAGCTTTATGTATAGCTATAAGTATTGCAACTCCATCATTTTTAGGTAAACAAAATATACTTAATCTTTTACGACAATCTTCTATAATTGGAATAATTTCAGCAGGTATGACTTTTGTTATAATATCTGGAAACTTTGATATATCAGTTGGAGCAGTAGCAGCTCTTGCAGGTGCTATAACAATGAAATTTGCGACTGGTGGAACTAATTTGTTTGCATCCATGCTCTTAGGTGTAGCGATTTGTGCAGTAATAGGATTAATCAATGGTATAGTAGTTGCAAAGATAAATGTACCATCATTAATAGCAACTATGGCTATGGTCACTATTGTAAGAGGATTG…
HS-FS-000016-I-01_66_71	TTGAATAAAAAACTTTATATAGGAATGGTCGGAATATTGTCTTTGATGATGGTTGGTTGTAATAAAAGTTTAGCAAAAGTAAATGATGTGGAAATCACAAAAGAACAGTACAAAAAAACAAAAGCAGTTTTATCTGCTACTAATAATTATATAAATGGGCAGTCTTTAGATGAATTAGAAAAAACTTTGGATAAAAAAGGTAGAAATAAATTAGAAAATGTTATAATATCGTTTATGGTGGATAATGAACTTTTATATCAAGAGGCTAAGGATAAAGGACTAACTCCAAGTAAAAGTGAAGTAGACTCAAAATATCAAGAACTAGAAGATAAGATGAATTTGAATACAAGCTATAAGGAAAAAATGGACAAAGCAGGTGTTGATAAAGAATATTTAAAA…
HS-FS-000016-I-01_71_38	ATGAATACTAGCGGAAGCGAGATTAAAATTATTGCAGGTAATTCATCGAAAGAGTTAGCACAAAAAATAGCTGACTATATAGGTGTATCAGTACTAGATTGTGAAGTAGGTACATTTAGTGATGGTGAAATATGTGTAAACATGAATGAGACAGTAAGAGGTTGTGATGTGTTTGTAGTGCAATCTACTAACAGCCCAGTAAATGATAACTTAATGGAGTTATTAATCTTAATTGATGCGTTAAAGAGAGCATCAGCAGGTAGAATAACAGCAGTCATTCCTTACTATGGATATGCAAGACAAGACAGAAAGGCTAAGGCAAGAGATCCAATCACTGCTAAATTAGTTGCAAATTTAATAACTGCTGCTGGAGCAGACAGAGTATTAACAATGGATTTA…
HS-FS-000016-I-01_66_70	ATGAGAAATAAAAAGAAAAAAATAAATAGAAAGAAGTTGTATTTGCTTTTAAGTGCTATTGTAGTGTGTCTGGCTTTTATAGTAGTTGGTGTTCGCGTCAGCTCTTTAAATATGAAGGAAAATGAAATTAGTAGAAATGCAAAACTGTCAAGTTCTACTATTACAGATATAGTATCTAATACATCAATAGAAGTTAGTAAAGGGCCAAGTAAAAGTTCTGGAAAAATAGCATACATAACTATAGATGATGGCCCATCTAAATTTACTGACGAGATGATAAAAACTTTAAATAAATACAATGTTAAAGCAACTTTTTTTATGATAGATGGGAATATGAAGGAATATCCACAGCAAGTTAAAAATATAATTAAAAATGGGAACACAGCAGGTTTTCATAGT…
HS-FS-000016-I-01_74_8	ATGCTATCATCATATGTTAAGAGGGTGAGTAAGATTATAAAGAAAAAATATATAATGTTTATTGATGAAAGTGGAAGAGCTGATATAAATCATGAAGACCCATTTACATTGACAGGAGTAATTTTTGAATATAAATATGCAGTAAGTCAAGGCGATTATGTATGTTCTTTGAGGAAAGAAATGGATGCATTTAAAGAGTATTGTTTTGGAACCAGTAACATAGGAATACATTTGACAGATATATCAAGAAAATCAAGAGCATTTGAGAAGTTTGATGATTCACAGATTAAGTTATTCTATGATGAGTTGCCTTTATTTCTATCTAGATTAGAGTGTACTATAATATCAGTAACAGTAGATAAAGCTAGATTAAAGAAATATTATGCACCTTCAAAGGAA…
HS-FS-000016-I-01_85_37	ATGTTGATAGTCACAGTCTTTGTATATGTACCATTTAAGTTTACTGTTATCGCCTTATCAGTTTGTATTGTAAATGCTTCTTTAACCTCACTAGTTGGCTTAAAGTTTATAACATCATTAGCAGTAGCTTTATCTATAGCTGATTTTAATTCAGAAATTGTTTTAGCTTCAACTGTTTTTACTTCTTGTAATGACTTCATTTCATTAAATGCTGTCTCATTACCATTCCCACCAACTTTAGTTATCTTATCAAAACTCTTAGAGTTAACTAGAGATTTTTGTGAAGCTGATAAGTTCTTTCCAACTAAAACTACTGGTGATTGA
HS-FS-000016-I-01_84_55	ATGTTATATAACAAAGAACAAGAACTTTTAAGAAAAGCAGTAAGAGATTTTGTTAGTAAAGAATTAGATACTTTACCAGCAGAAATGGATAAAACAGGTGTAATGCCTAAGGAATTAATCAAAAAATTAGCTGATGCAAAATTTATAAGCAGTAATATCCCAGAAGAATATGGTGGTGGGGGAGCAGGATATGTTTCTTACGCTATAGTAATGGAAGAAATAGCTAGAAGATGTGCTTCAACAGCTACTTTTGTTACAGCTGGTTCTTCTCTTGCTTCATTACCAATACTTTACAATGGTACTGAAGAGCAAAAACAAAAATACTTAAAAGGTATAGCAACAGGTGAATTAATAGGAGCATTTGGGTTAACTGAGCCAGGAGCTGGTTCTGATGCAGGT…
HS-FS-000016-I-01_80_88	ATGAGAAAAAAGATTATATCTTTCTTAGCAACATTTATCATAATATTAACATCAGCAAGTCAGTATAGTTTTGCAGATGATATGTCAACACGTGGAAAAGTAATATTTATAGATATGAATAGAACTAGTATGAGTAATATGTTAAGAATAAAATCATTAAGAGAAGAACTAGACAATAGAGGGTATATTGGCTTGATGAATATAAGAGGCGATAAAGGAAGTGATGATAGAAGGTCATATGCTAGTATGGGTGCTGGTGGTAGAGCTAATGTGGCTAATGAAGAAGATATTAATTTTGAAAGCTCGAGTAAGGATAGAAATATAGTTTTTGAATCAGCTACAGGAAAAAGTGCAAAAGGTATAAATAATTTAACTATAAATAAGTCTATAAATGAAAAT…
HS-FS-000016-I-01_68_18	ATGGCTGGAGCTGATATAGGCATAGATTTAGGTACTGCAAATGTGCTTGTTTATGTTAGTGGTAAGGGAATCGTTTTAGAAGAACCATCTGTTGTGGCGATAGACAAAAGAACAGATTCTGTTTTAGCTGTGGGAGAAGAAGCTAAAAAGATGATAGGGAGAACACCAGGTAATATAGTCGCTATAAGACCTTTAAGAGATGGTGTAATTTCAGATTATGATGTAACTGAGAAGATGTTAAAATCTTTTATAGATAAGATAGTTGATAAAAAGGGATTTGGAAGATTTTTTATGCCAAGAATTATGGTATGTGTACCAACAGGTGTCACAGAAGTGGAAAAAAGAGCAGTAGAAGATGCTACGAGACAAGCTGGAGCTAGAGAAGTATATATCATAGAA…
HS-FS-000016-I-01_80_81	ATGAGTACAAGGGAATTAACATATGCACAAGCAATAAAGGAAGCAATGTCAGAAGAAATGAGAAGAGATGAAAATGTAATATTTATGGGAGAAGATATAGGAATATATGGAGGGGCATTTGGTGTATCAGTTGGTATGATAGATGAATTTGGACCAGAAAGAGTAAGGGATACTCCTATATCAGAAGCAGCTATAGCAGGAGCGGCAGCAGGTGCAGCAGCAACTGGTTTAAGACCTATTATGGAAGTAATGTTTATGGACTTTGTAACAATTTCTATGGATGCAATTGTAAATCAAGCGGCAAAAATGAGATATATGTTTGGAGGAAAAGCACAAGTTCCAATGGTTGTTAGATGTCCAGGTGGTTCTGGAACTGGTTCAGCAGAGCAACATTCACAA…
HS-FS-000016-I-01_68_76	GTGAAGAAAAAGATATTAATACCAGTATTTGCATCAGTTATGGCATTATCAGTAAGTTCAATTGTAAATGCAGATGAAGTAAATGATTCATCTCAAAATAAGGATGATAAAACAAATACTGAATTAAATTTAGGTGAATATAAAGAAGTAAAATATAAAGTTGCAAAAATAAAAGATGGAGTAGCTATAAAGATAAGAGAAGAAGGTCAAGTTCAAAACATAGCTTATTCTGGAGATGAATTTACGGTTTTAGGAACTCAAGGAGAATGGGTTAAGGTTAAAGTTGAAGATGGCGAAGGTTGGTTAGCTACTAGATATGTAGATATATCTGAAGGTGTAGGATATACTAACGCTGATAAAGTAAACTTAAGAAAAGATAAGAGTGAAAGTTCAGAAGTA…
HS-FS-000016-I-01_64_51	ATGGGATTTAAATCTGACATTGAAATAGCTCAAGAAGCTAAGCCTCAAGATATTAGAGAGGTTGCAAAAAAATTAGGACTAGGTGAAGATGATGTAGAACTTTATGGTAAATACAAAGCAAAAGTTGACTACAATCTACTAAAAAGAGAGACTGGTAAAAAAGCTAAGTTAATACTAACTACAGCTATAAATCCAACTCCAGCAGGTGAAGGAAAAACTACTACTACTATAGGTGTTGCTGATGCATTTGCTAAACTAGACAAAAATGTATTAGTTGCTTTAAGAGAACCATCTCTAGGACCAGTATTTGGTGTTAAAGGTGGAGCAGCTGGTGGAGGATATGCACAAGTTGTTCCTATGGAAGATATAAACTTACACTTCACAGGAGATTTTCACGCT…
HS-FS-000016-I-01_74_7	GTGAAAAAAAGTCTAAAAAAGTATTTAGTACTAGCACTGACTTTAGTTTTAGTATTTGCATGTGGCGTACCAGAATCAAGCGCAGCCAGTAAACATGTGATTATAGTAAATTCAAGAAAGAATACTCTAGGATATTTTGTAAATAATAAACTTGTAAAAGAATTTAGAGTTGCAACAGGTAAAAAGGGGTCAGAAACACCAACAGGGAAAACAAAAGTAGTTAACAAGATAAAAAATAGACCATATTATAAAGGTAATATACCTGGAGGAAGTCCAAGAAATCCATTAGGAGATAGATGGATGGGATTAGCATTAAAAGGAACTTATGGAGATACATATGGAATACATGGAAATAATAATGAGAGTTCTATAGGAAAGCATATTTCTGGTGGATGTATA…
HS-FS-000016-I-01_63_23	ATGGTGCAGATAGTAATAGTGTTAGCGATTTTTATGATTTTAGTAATACCTATGGGCAAGTATTTATATCATATAGCTACTAATCAAAAAACATTTGGAGATAGACTATTTGATAAAGTGGACAATTTTATATATAAGGTATGTAGTATAGATAAGAAAAAAGAAATGAACTGGAAACAGTATGCATTAGCTTTATTATTTACAAATGCAGTTATGGTATTTATAGGATATATCATACTTAGAACTCAAAGTATGCATATTTTTAATCCAAGTGGAATTAAAAGTATGGAACAAGGACTATCATTTAATACAATAATAAGTTTTATGACAAATACAAATCTTCAACATTATTCAGGTGAATCAGGACTTTCATACTTTAGTCAGATGACAGTGATAATA…
HS-FS-000016-I-01_79_14	ATGAAAGATAAAAAATTTACCCTTCTTATCTCTATTATGATTATATTTTTATGTGCTGTAGTTGGAGTTTATAGTACATCTAGCAACAAAAGTGTTGATTTATATAGTGATGTATATATTGAAAAATATTTTAACAGAGACAAGGTTATGGAAGTTAATATAGAGATAGATGAAAGTGACTTGAAGGATATGAATGAAAATGCTATAAAAGAAGAATTTAAGGTTGCAAAAGTAACTGTAGATGGAGATACATATGGAAACGTAGGTATAAGAACTAAAGGAAATTCAAGTCTTACATCTGTAGCAAATAGTGATAGTGATAGATACAGCTATAAGATTAATTTTGATAAGTATAATACTAGTCAAAGTATGGAAGGGCTTACTCAATTAAATCTTAAT…
HS-FS-000016-I-01_68_23	ATGGAAAAATTAGAAGGAATGATAAGTGAAATAGTCTTTAAAAACGAAGATAATGGTTATACAATAGCTCACCTGGTAAATGAAAATGATGAAATTGTGGTTGTAGGATGTATGCCTACTTTGGCAATTGGAGAAAGCATAGAAGTTGAAGGAAAGTGGGTAAATCATAAGATTTATGGGACTCAATTTGAAGTGAATAGTTTTATGCCAGTAACGCCATCATCCTTAGAAGGAATTTATGTTTACTTATCTTCTGGAATGATACATGGTATTGGTGAAAAAATGGCAAAAAGAATAATTGATAAGTTTGGTGTAGATACGTTAGAGGTGATACAAAATTCACCAGAAAAATTACAAGAAGTAGAAGGTATAGGGAGTAAAAAAGTAAAACAAATAGTA…
HS-FS-000016-I-01_76_51	ATGTCAAAGATAGTTGTAAATCAAGATAAAATAACTGACTTAAAGAGAATTTTAGAAATATGTCCTTTTGGGGCTATAGAAGAAAAGTCAGGTATAGTAGAAATAAGTGCTGGCTGTAAGATGTGCAAGTTGTGTGTCAAAAGTGGACCAAAAGGCGCATTTGAATTTATAGAGAGTAGTAAAGTACAAATTAATAAAGATGAATGGAGGGGAATTGCAGTATATGTTGAACATCATAATGGAAATATACATCCTGTAACGTACGAGCTTATAGGTAAAGCTCGTGAGATGGCATCAAAAATAAAACAACCTGTGTATTGTGTATTTGTAGGAAAAGACATAAAAGATAAGTGCAGTAATTTGATTTCTTATGGGGTGGATGAAGTATTTGTATATGAT…
HS-FS-000016-I-01_63_30	ATGGAAAACAATTTAAATATAGCTAAAAAAAATAATACTGAATTATTACAAAATGACTCACTTAAGGTCAACTTACAGATAGGTGTAGACTTTACACTTTTATCAAAATCACTTAAAGCCTTTTATAAAAAAGAAAAAGATTTTTATTGCATTGCTCTTGCGCCATGCAATGTATCTAGTGAAAAAGCAAATAGAAAAATAAGTATTTACGATATGATAAAAGAAATTAATATTTTAATTGAAAGTATAACTGATAAAAATGAACTTTTAAGTGAAGAACTCTTTACTAATAATTTATCAGAATTTTATGATGAATCTTTAGATGAGATTTATATAGACTTAAAACAAGCATATTTATATATTAAAAAGAATACAGATAGTCTTAACATAGAAGACTCA…
HS-FS-000016-I-01_74_74	ATGATGCTAAACTTTGACGTAGAATTAGAAGAATGTGCACAAATTAAAGTAATAGGTGTAGGTGGCGGTGGAAACAATGCTGTCAATAGAATGGTAGAAGCTCAACTAAAAGGCGTTGAATTTATATCAGTAAATACAGATAAACAAGCTTTATATACATCAAAAGCTGAATATAAAGTTCAAATAGGAGAAAAATTAACTAGAGGACTTGGAGCAGGAGCAAATCCAGAAGTAGGGAAAAGAGCTGCTGAGGAGAGTAAAGATGAAATAGTAAAGTTACTTCAAGGAGCTGATATGGTCTTTGTAACAGCCGGAATGGGCGGTGGTACTGGTACAGGAGCTGCTCCAGTGGTTGCAGGCTTGGCAAAAGAAATGGGGATACTTACAGTAGGTGTAGTT…
HS-FS-000016-I-01_79_18	ATGAAAAAATTAATTCATTTTTTAAAACCATATAGAGTTTTAATTGTTGTAGTTTTGATATTTACGTTTTTACAAACACTTGGAACTTTGTATATACCAACACTTACAGCAAATATAGTAAACAATGGTGTAGTAAAGGGAGATATAGATTATATTGTAAAAACAGGTTTAATAATGATGATAGTAGCTGGTATAACAGCTTTATCAGCTGTGTTAGTTTGTAAAGTATCAGCAAATCTTTCATCTGGATTTTGTAGAGATATTAGAGAAGCAGTATTTGTAAAATCACAAGATTTATCAATAAATGATTTTAATAATATAGGTACAGCATCAATGATTACTAGGAGTACTAGTGATATTACTTTAATAGGTCAGTCTGTGTTTATGTTTATTCAATTG…
HS-FS-000016-I-01_77_78	ATGGCGTTTTATTTTGATACACCATCACATACTTTCAGTGAATACCTTCTTGTACCAGGTTTCTCTTCTACTGATTGTATACCTGCTAATGTAAGTTTAAAAACACCTGTTACTAAATTTAAAAAGGGCGAGGAAGCAGATATTTATATGAATATACCTTTGACTTCTGCTATTATGCAATCTGTTTCTGATGACAAAATGGCTATTGCACTTGCTAAAGAAGGTGGTATTTCATTTATATACGGTTCTCAAACTATTGAAAATGAAGCTGCTATGGTAGCACGTGTTAAATCCCACAAAGCTGGTTTTGTTGTAAGTGATTCAAATATTAAACCTGATAACACATTAAAAGACATACTTGACTTAAAAGAAAAAACTGGACATTCTACAGTAGCTGTT…
HS-FS-000016-I-01_65_270	ATGTCAAGAGCTGAGCGTTTAATTGAACTGATGATAACAATAAATGCAAAAAGAAGTTTTACAGCGGGAGAGCTAGCAGAAGAATTTTCTGTATCAAAACGTACTATACTAAGAGATTTACAGGTATTGGAAAGTGTTGGATTTCCACTATATTCAAAAGTTGGAGCGGCTGGAGGATATCATGTACTTAAAGAACGTATACTTCCACCAATTACATTTTCAGAGAGTGAGGTAAAATCTATATTCTTTGCATATCAGTCACTAGAGTATTATAATGATTTACCATTTGAGCAAGAAACTATTTCTGTTTTAAAGAAATTTTTAAATTGTATACCAAATGATATTCAATATAATATTGAGAATATGAGACGTAAACTTGTTTTTTGGACACCAGATAGG…
HS-FS-000016-I-01_76_21	ATGGTGATACTTACAGCTGTATTAGTTTTAGGAATTATGGGCTTAATCTTCGGGATAGTACTAGATTTCGCATCTAAAAAGTTTGCTGTAGAAGTAGACGAGAGAGTGGAAGCTATACTAGGAGTACTTCCAGGAGCCAACTGTGGAGGTTGTGGATTTCCAGGTTGTGGAGGTCTTGCAAATGCGATAGTTGAAGGCAATGCACCAGTTAATGGTTGCCCTGTAGGTGGAGCAGATGTTGGTGCAAAAGTTGGAGAAATAATGGGAATAAGTGCTGAAGCAGGTGAGAAACAAGTAGCAAAAGTTATTTGTAAAGGAACTTGTTCAAGTGCAAAAGATAAATATGAGTATGAAGGAATATCAGATTGTAGAGCAGCAAATGTTTTAAACTCAGGTGCT…
HS-FS-000016-I-01_64_134	ATGGAGTTATTTTTAGTTGTAATTTCGATTGTACTATTTGCTTTCTACTTAAAAGAACGAAATAAGTCAAAGAAAATGGAAAGTGATTATAAGTATATCAATTCAAGACTTCGTGATATAACAAATGATGATGAAATTAATTATATTTTAGTACCATCTGATATTTCGATTGTAAAAGAAACAGCAGTAGATATAAATAAACTTCTTGAAAAGTTTTACAGTAGGCAAATTAATTATAATAGAAGTGAAAAAGCGATATTGCAAATATTTACAAACATATCACACGATTTACGAACTCCCATCACAGTATTAAAGGGTTATATTGAAATGCTATATCTTCAAAGTCAAAAAGAAGAATTATCTTCTTCAATGAGAGCAACTTTGGAAAAAATGCAAACA…
HS-FS-000016-I-01_80_68	ATGGCAAAAAATGAAAAACAATTTGTTGAAGAAATAACAAAGATGGAAGATGATTTTCCACAATGGTACACAGATGTAATAACTAAGACTGACTTAGTTGATTATGCACCAGTAAAAGGTTTTATGGTTGTAAAGCCATATGGATATGCATTATGGGAAAAGATGCAAGAATTTATGGATAAAAAATTTAAAGAAACTGGACATAAAAACTGTTATTTTCCATTATTAATACCAGAGAGTTTATTAAACAAAGAAGCAGAACACGTTGAAGGTTTTGCTCCAGAAGTTGCATGGGTAACACATGGAGGAAATAAAAAATTAGAAGAAAGATTATGTGTAAGACCTACTTCAGAGACTATAATATGTACAATGTATGCGAAATGGTTAAAATCATATAGA…
HS-FS-000016-I-01_71_55	ATGGGTAAGATAAGTATTGTAGGTCTTGGACCAGGAGACTATTCTCTTATAAGCCAAGGTGTGTTAGAATCTTTAATAAATAGCCCTAAAGTTTTTTTTAGAACAGAGAAACATCCAATAATTGATAAACTTAAAGAAACTATACAATACACTTCTTTAGACTACTTTTATGAAAAAGAGGAAAATTTTGATAATGTTTATTTGAAAATATCTGAATTTATCATAGAAGAATCAGCAAAGGGTGACCTAGTGTATGCTGTTCCTGGTCATCCAAGAGTTGCAGAGAAGACTGTAAGTATAATAGAGAGATTAGCCAATGAAAAGCACATAGCAGTAGAAATATTGCCTTCTATGAGCTTTGTAGACGCTATGTTTAACTATTTGGCTATAGACCCATCT…
HS-FS-000016-I-01_77_71	ATGGAAAAAGCAGTGGAAAACTTTGAAGATTTAAGTAAGGAATACATTAATGGTTATATTGAGAGAGCAAGAAAAGCTCAAAGAGAGTTTGAATGTTATACTCAAGAACAAGTAGATAAAATAGTAAAAATAGTTGGAAAAGTAGTGTATTATAATGCTGAATATTTAGCTAAACTTGCTGTAGAAGAGACTGGAATGGGAGTATATGAAGATAAGGTAGCTAAAAATAAAAGCAAAGCAAAAGTTATATATAACAATTTAAAAGATAAAAAATCAGTTGGTATAATTGATATAGATAGAGAAACTGGAATAACAAAGGTAGCTAAACCAGTTGGAGTAGTAGCGGCAATAACTCCTTGTACAAATCCAATCGTTACACCTATGAGCAATGCAATGTTT…
HS-FS-000016-I-01_77_69	GTGAAGTTTGAATTGATGGATTTTTTAATGAATCCTTTTGTCCTTATGTTTGCTGCAGTAATTACAGGAATTTTATTTGGAAAAATTAAATTTGGGAAGTTTAATTTTGGGGTATCAGGAGCATTATTTACAGGATTATTTATTGGATGGCTTGCATATAGCTTGGGGAATCTAATAATAGCAAAAGGAGAAACAGCAGCAGGATATAAGGCAGCAACTGTAATGATGGGGAATGGAATTATTTCTTCTGACTTCTTTGATTTCTTTTTAATAATATTTGTTGCAGCAGTTGGTCTATTGGCAGCAAAAGATATGAAAGCTGTATTAAAGAAGTATGGAGCAAGATTTGTAATTTTAGGAGTTCTTATAACTTTTATAGGTGGCTCTATGACTTATGCA…
HS-FS-000016-I-01_68_44	ATGAGTGATATAATAACATTAGCTATAGAGAGTAGTTGTGACGAAACAGCTGCATCAGTTTTAAAAAATGGTAGAGAAGTACTTTCAAACATAATCTCTACTCAAATCGAGACACATAAAAAATTTGGTGGTGTAGTTCCAGAAGTGGCCTCAAGAAAACATGTGGAAAATATTGATATAGTTGTTCAAGAAGCTTTAGACAAAGCAAATATAGGTTTTAATGATATAGACCATATCGCAGTTACATATGGACCTGGGCTAGTAGGTGCTTTATTGGTTGGTCTATCTTATGCTAAAGCACTTGCATATACTTTGAATATTCCACTTGTAGGAGTAAATCATATAGAAGGGCATCTAAGTGCAAACTATATAGAGCATAAGGATTTAAAACCTCCTTTT…
HS-FS-000016-I-01_68_7	ATGGCTAAGATACTTATGAAAGGTAACGAAGCATTTGGAAAAGCAGCTATAGAAGCTGGTTGCAAATATTTCTTCGGTTACCCAATAACTCCACAAAGTGAATTACCAGAATATTTATCAAGAGAGTTACCTAAAATAGGTGGAGCGTTCGTTCAAGCTGAATCAGAAGTTTCTGCGATAAACATGGTTTATGGTGGAGCAGGTGCAGGAGCAAGAGTTATGACTTCTTCATCTTCACCAGGAGTTGCTTTAAAGCAAGAAGGTATAACATATGCAGTAGGAGCAGAAGTTCCTTGTGTTGTACTTAATGTAATGAGAGGTGGTCCAGGACTTGGAAGTATACAACCTTCACAAGCTGACTACTTTATGTCTACAAGAGGTGGAGGAAATGGAGACTAC…
HS-FS-000016-I-01_75_70	ATGCATGAAGATAAAAATGATATATTTGAATCAATAGATACTGAGGATTTTGATAATAAAACAGAAGAAGAATGTTTAGAGCTAGTAAGAAAAAATGGATTGAATTTAATATACATAAAAAATCAAACAGAAGAGATATGTCTAGAGGCTGTTAGACAAAATTGTAATGCAATAAAATGTGTTCAGAATCAGACAGAAAAAATATGTATAGAAGCAGTTAAACAAGATTGGAGAATGTTAGAATTTGTGGAAGAGTCAACAGAAGAAATTTGCATGTTGGCTATTAACCAAGATGGAACAGCATTAAAATATATAGAAAATCAGACAGAGGAGTTATGCTTAAGAGCCGTTGAAAAAAATGGTGCGGCTTTGGAGTATGTAAAAGAACAAACAGAAGAA…
HS-FS-000016-I-01_71_52	TTGAAAAAAGTAATAACATTGGTAATAGCTATGATTTTGGTAGTATCTGTGACTGCTTGCAGTTCTAGTAAAGGAGAAACTGTGGCAACAGTTGAAGGTACAAAGATATCATCAGATGAATTTAAAAAAACTATAGCTCTTTATAAAGATTCTATGGAACAAACTTATGGAAAAGATATATGGGATAAGGAAGTTGAAAAGGGTGTAAAATACAAGGACAAGTTTAAAGATTTAATTCTTGACCAACTTATAACTACAGAAGTAATATATTCTCAAGCTAAAAAAGATAACTTACTTCCTAAAAAAGAGGATGTTGAAAAAAGTTTTAAAGAATTAAAAGACGCTATGGGTAAAGATGAAAAATATAAAGAACAACTTAAGAAATTAGGTATAGATGAT…
HS-FS-000016-I-01_63_170	ATGTTTTCAGATATGACTTTACTTCAGTATATAAATAGTGAAGATAGAGGTTTTTTTCTGCCTGATATGGGTACAAATGGATTGTTCTTAATAAATAAAAAGGCATATGAAGTATATGATAGTGTAGATTTGCAATTAGAATTAGCAAAGACTATGGACAAGTATTTTGAATCAGATTTTATATACTCATTCTGTGATGGGATTACATTTTGTGAAACTCTGGGTTTAGAGACATTAAGACCAGATTATGATTTTCCAAGTGTATTGACACATACTATAACTGACAGAGATAAATTAAGAAAATTAGATGTTCCAGACCCTTATACGAGTGGACGTATGCCACTCAATATAGAGAGCTTATCAGTTATATCAAAAAGTATTAAAAAACCACTATATGAA…
HS-FS-000016-I-01_66_78	ATGGCAAGAATGTATTATGAAAAAGATGTGGATTTAGAGGTTTTAAAAAATAAAAAGGTTGCAGTTTTAGGTTATGGAAGTCAAGGACATGCACATGCACAAAATCTTAGAGATAACGGTGTACATGTAGTGATAGGTCTTTATGACGGAAGTAAATCAGCACAAAAAGCAAAAGAAGATGGATTTGAAGTTAAGAGTGTAGCAGAAGCTACAAAAGAAAGTGATTTGACAATGATGTTAATGCCTGATGAAAAACAAAAGAAAGTTTATGAAGAGAGTGTAAAGGATAACTTAAAAGAAGGTCAGACATTAGCTTTTGCTCATGGATTCAATATACATTATAATCAAGTACAACCACCAGAATTTGTTGATGTTGTAATGGTAGCTCCTAAAGGACCT…
HS-FS-000016-I-01_77_75	ATGGAAGCACTTAGAGTAGTTCCAAAGATATTTTATTTTGATACATTTAAAGAATTTAATGAAGAATTTAAAATAGGAAAAAATGATTTAGTAATTACTAATGAGTTTATATATGAGCCATATATGAAACCTCTTGGAATAGATACAAATTTAATTTTTCAAGAAAAGTTTGGAACAGGTGAACCATCTGATGAAATGATAGACTCCATGACAAAGGAAATGAAGAAATACAATTTTGATAGAATTATTGCGTTTGGAGGAGGAACAATAGTTGATATATGTAAGATATTAGCACTTGATGTTCCAGAAAAGTCTATTGATTTATTTGAAGGAGAAGTATCACCTAAAAAAGTAAAAGAGTTAGTAGTAGTTCCTACAACATGTGGTACAGGTAGTGAA…
HS-FS-000016-I-01_84_57	ATGAATGATATAAAAGATTTAAGTTCTTATAAAAACGTATGGATATTTGCAGAACAAAGAGAAGGAAAAATAGCTCCAGTAGTTATAGAATTATTAGGAGAAGGAAGAAAATTAGCTAAAGAAGTAGATGCAGAACTTTGTGCAATATTATTAGGAAAAGATGTTGATGGATTAGCTAAAGAATTAATCACTTTTGGAGCTGACAAAGTTTATGTTGCAGATGATGCTCTTTTAGAAAAATATACAACTGATGCATATACAAAAGTAATAAAAGATGCAATAGATGAAATAAAACCAGAAATAATGCTTTTCGGAGCAACTCATATAGGTAGAGACTTAGCACCTAGAATAGCTTCAAGAGTTGGAACTGGATTAACAGCTGACTGTACTAAGTTAGAA…
HS-FS-000016-I-01_75_49	ATGGATTTCAAAAGCTTAGGGATTAGTGAAAATACAATAAATATTCTAAAAAAATCAGGAATAACAACACCTACACCTATACAAAAAGAAAGTATTAAACTAATAAAAGAAGGAAAAGATGTAATAGCAGAAGCTCAAACTGGAACAGGAAAAACACTAGCTTTTTTACTTCCGATATTTGAAAATATATCATTAGATATAAATGATATACAAGTACTTATACTTTCTCCTACAAGAGAACTAGCTATTCAAATAACAGAAGAAGCTATGAAACTTAAAGAATCTAAAGATGTAAGTATTCTTGCAGCATATGGAGGAAAAGATATTGGTTCTCAAATAAAGAAACTAAAAGGAAATATTCATATGATTATAGCTACACCAGGTAGGCTTTTAGACCAT…
HS-FS-000016-I-01_76_106	ATGAACTTTAAAGAAAATAGATTGAAAATAGCAGTATTAATAATTGTTATTTTGATTATCTTAGCAGGTATATTTGTGTTTATACAAATAGGTCCTTATGATAAAAATAACAAAAAAGATGTAATTATTGACGTTCCAAGTGGAGCATCTGTTGGAAAAATATCTGACATATTATATGAAAATAAATTAATAAAGAATGAACTATTATTTAAACTTTTGGTAAAGGTTAGCAATAAAGCTCCGTCTATAAAATCAGGAACATACTTACTTAATCAATCGTATTCAAACAATGATATAATAAGTCTTTTAGTTTCAGGTAAAATATATCAGGATGGTATAAAAGTGACTATTCCAGAGGGAGCTACATCTAAAGAAATTATAGCAATGTTAGTAAGTAAA…
HS-FS-000016-I-01_65_20	ATGAAAAAGAGAATTATACCTATATTTGTTCCTCACAAAGGATGTCCTCATGATTGCATATTTTGTAATCAAAAAAAAATAACAGGTGTGAGTACTGATGTTACTAGTGAAGATGCAAGAAATATAATTGAGGAATGTTTAGAGACTATAGATAAAGATGCAGATGTAGAAATAGCATTTTTTGGTGGTAGCTTTACTGCTATAGATATTGATATACAAAAAAGTTTATTATCAGTTGCTAAAGAATATGTAGAAAAAGGTCTTGTAAAAGATATTAGAATGTCTACAAGACCAGATTGTATTGATGAAGATATATTAAGTATGCTAAAAGAATATAAGACAAGTATAATTGAACTAGGAGTACAATCCTTAGATGAAAAAGTATTATTAGATAGTATA…
HS-FS-000016-I-01_76_58	ATGAAAATAGTAATTGATGGAATGGGTGGAGATAATGCACCTAAATCTAATGTAGAAGGCGCAGTAAATGCTATAAAAGAATATCAGGTTGATTTAATAATCACAGGAGATAAAGATTTACTTGAAAAGGAATTTTCAAATTATGAATTTGATAGAAATAAATTAGAGATAGTTCATACTACTGAGATTATAGAAAACGAAGATAAACCAGTAAAGGCTATAAGAAGTAAAAAAGATTCATCTATGGTAGTAGCATTAAATCTTGTAAAAGAAGGAAAGGCAGATGCTATAATATCAGCTGGAAATACAGGAGCCTTACTTGCTGGTGGATTATTTGTTGTTGGTAGAATAAAAGGAATCGATAGACCTTGCTTATGTTCAGCAATACCAAATGTAAAG…
NODE_6_length_198931_cov_44.0683_88	ATGAATCAAAAGAAAGTTCATTATAATAAATCGGCTACATCAAAAGATGTCGCAAGATTGGCAGGAGGATCTCAATCATCTGTTTCAAGAGCATTTGGTAGTGCAAATGGAAAGGGCGTAAAACCTGAAGTAAGAGAAAGAATTTTTCGTGTAGCAAACGAAATAGGGTATGTTCCTAATTTGGTAGCACGGGGAATGATTAGTGGAAAAACTAATGTTATAGGTTTGATAGTTGGTGATAGTCTAGGTCCATTTTACAATAGAATTATCAATTTATTTGTAGAAAAAATTCAAGAGATAGGTAAACAGTGTCTCGTTTTTAAAGTTCCTAGACAACAAAGTATAGATAGTATAATTTCAAAAGTAATTCAGTTTCAAGTAGAAGCTGTGATTATTACA…
FADY01000030.1_5	ATGGCTACAGAAAAATTAACACCTAGCGTTGTTTCAATACCAAACAAGTTTTGCCCAGGTTGTGGTCATGGAATAGTAAATCGTATAATAGCAGAGGTAATAGAAGAACATGGATATGAAAAAAATCATGTATTAACATTAGGAGTTGGTTGTGTCTGCAATATGAATTTTAGCTGGAATGGTGATAAGATGCAAACTGCACATGGTAGAGCTTCATCTACAGCTATAGGAGTTAAAGTAGCACTTCCAGATACATTAGTAATGACTTACCAAGGTGATGGAGATGCTTATGTTATAGGTCTTTCTGAAACTTTAAATACAGCATATAGAAATCATAATGTGACTGTATTTGTAATAAACAATAATAATTTTGCAATGACTGGTGGACAAATGTCATGG…
ERR347743_ST1_91_226	ATGGATATAGATAATAATTTTGAAGAATTTCCAAATATTGAAGAAAGACAAAAAGATTTTAATTGTTCAATTGGTTTTACCACGACTGTGATAGGAAGTAAATGGAGGGCAATTATTTTATGGCATATTTTAAAACAAGAGCCAATACGTTACAGTCAATTAAAAAAAGATGTTGTTCATATAAGTCATAAGATACTGTCACAAGAATTAAAGTATCTTGAAAGAGATGGACTTATTAAGAGAATTTCTTATCCGACTATTCCTCCAAAAGTTGAATATTTGTCTACTAAACGTGGTAAATCATTGGAATCTATATTATTAGAATTATGTAATTGGGGTAAACAGTATATGAGATAA
HS-FS-000016-I-01_73_103	ATGTTTAGAAAAGTATTGCATTATTTAACACTACTTTCTATTTCTATTTTTTTTATTGTTGGATGTTCAAATTCACAAAACAATCAAAACGAAAATCAAAATAAGGAAACACAGTTACAAGAAGATAAGGAAAAAATAGATGGTGGTAAGGATACTTCCAATGTAATAGTTTCAGACGGAACAGATAAACCATCAAAAGCCACTACTAATAATGATAATAATAAATTAGATGTATCTTCTTTAGATAACACTACTCTTGATTGGTTTTATATACCTAACAATAAGCATAAAACACCAGAAGTAAATACGGACATTGAATTTAAATTTTCTGACTATGATGCCCTATACAATGGACCTACAAAAGATGGTCAAAAAACACTATATCTTACATTTGATGAA…
HS-FS-000016-I-01_79_63	ATGAAAGTAGGATTTGACCACAAAAAATATTTAGAAGAGCAGTCTAAATACATCTTAGAAAGAGTAAATAATTTTGACAAACTTTATTTAGAGTTTGGAGGAAAATTGATGGGAGACCTTCATGCAAAAAGAGTACTTCCAGGATTTGATGAAAATGCAAAGATAAAAGTATTACAACATATGAAAGAAAAAGTTGAAGTTGTAATTTGTGTCTATGCAGGAGATATAGAAAGAAACAAAATAAGAGGAGACTTTGGTATCACTTATGATATGGAAGTTTTAAGATTAATAGATGATTTAAGAGGTTATGAACTAGATGTAAATAGTGTAGTAATTACTAGATTTGAAGGACAACCTGCTACAACTGTATTTATAAATAAATTAGAACGTAGAGGAATT…
HS-FS-000016-I-01_74_66	ATGTTAGGAATAACAGAGCTTACGTACACCGCATTGATTGCGTTTTTAATAGTAATTATAATAGGACCAATATTTATACCAATGCTTAGAAAATTTAAATTTGGTCAGACAGTTAGAGATGATGGACCCCAAACACATCTAGCTAAAAACGGAACACCTACTATGGGTGGAATTATAATGATTGTTGCAATTCTAATAACTGGACTTACAAGAGTAAAAGTTAGTCATGATATGGCAGTAGGTCTTATATGTATTGCAGGTTTTGGTTTTATTGGCTTTTTAGATGATTTTATAAAAATAAAGCTAAAAAGATCACTTGGACTAAAAGCATATCAAAAAATAATCCTTCAAGTTGCATTATCTTTTTATGTTGCTTTTTATCAGTATACATCATCATCA…
HS-FS-000016-I-01_79_43	ATGTATAATATATTAGTTACTGATGGAATAGAGAAAGAAGCAGCGAGAAAATTGAGAGAGTTAGATTTTAATGTGATAGAGCAGTTTTATGAAAAAGATGTTTTAGGAGATAAACTTAAAGATGTTGATGTACTTGTAGTACGTTCAGCTACTAAAGTTACTAAAGATGTAATAGATAAAGCATTAGAGGGTAAAAAGTTGAAGTTGATAGTAAGAGGTGGAGTAGGTCTGGATAATATAGATGTTAAATATGCTCAAGCTAATGGCATAAAAGTTATGAATACTCCAAATGCAAGCAGTATATCTGTTGCAGAGCTTACAATAGGTCAATTATTTGTTCTTGCAAGATTCATAAATACTGCAAATGTAACTATGAGAGATGGAAAATGGGAGAAGAAG…
HS-FS-000016-I-01_63_248	ATGCTTTTACGTGCAAGTATTGGGATGGGAATAGTTATATTTACCATGGCGTTTGTTCAAAATGTTTATCAGTTATTAGGATTAAGAATACTTCAAGGAGTTTTTACGGGTTATGCTACTGCATGTACTACTCTTATTGCAACACAGACAGATAAAAATCATTCAGGATGGGCTTTGGGTACTCTTGCAACTGCATCAACTACTGGCTCATTAATTGGTCCAACAGTAGGAGGATATATAGAATCAATCTTGGGTCTTAAAAGTACATTTATTATAACAGGAGGATTGTTGTTTGTATCATTTATCATCTCTATTTTATTTGTAGTAGATAATTTTAAACCTAAAGAAATAAAAGAATCAATTTCTATACCTAAAGAACAATTAAATATATTGCCAAAT…
HS-FS-000016-I-01_65_104	TTGGAAACATTTAGTTTGCTTGAAATTTTTAAGGCAGTCATTTTGGGCATAGTTCAGGGAATAACAGAATGGCTACCAGTAAGTAGTACAGGGCATATGATATTAATTAATGAGTTTATAAAATTGAATTTTTCAAATACATTTATAAATACATTTTTAGTTGTAATTCAATTTGGTTCAATACTAGCTGTACTTGTTATATTTTTTAGAAAGTTAAATCCTTTTGATAGTGCAAAGAATATTAAACAGAAAAAAGAAACAGTTCGTTTATGGCTTAAGGTTATAATTGCAGTTATACCATCTGGAGTTATTGGAATACTGTTTGAAGATGACATAGACAGAGTATTCTTTAATTCAACAGTAGTTGCTATTGCTCTTATTGTCTATGGTATAATAATG…
HS-FS-000016-I-01_65_156	TTGAATCATAATACTAGTATTAAGAACAAGGACAGTAATCCAAAAATATTTTTAGTACTTACACTTTATCTATTAGGTATATTTATGGGAGCTATTGATACTGGAATAGTATCACCAGCAAGAACGATTATACAAAATAGCCTTGGAGTAAATGAAAAAACGGGAATTTGGATGATTACCATATACACATTAACATACGCTTCTGTAATTCCTATCTCTGGAAAATTAGCAGATAAAATAGGAAGAAAATATGTGTATCTAGTTAGTATATTTCTATTTGGTAGTGGTTCATTAATATGTGGATTATCATCACTATTTTCCAATTTCTATATTTTATTAATTGGTCGTGTTATTCAAGCAATTGGTGGTGGTGGAATCATGCCAATTGCTACAGCAGAA…
HS-FS-000016-I-01_74_95	ATGAATAATAACATATACGAAGATATATCCAAAAGGACTCAGGGGGATATATATATTGGAGTAGTTGGACCTGTAAGAACAGGAAAATCAACTTTTATAAGAAAATTTATGGAAAAGTTGGTTATACCTAATATAGACAATGAATTTAAAAAGGATAGAACAAGAGATGAGATACCCCAAAGTGGTTCAGGTAAAACGATAATGACAGTAGAACCAAAATTTGTACCAGCAGATGGTGTAGAAATAAAAATAAAAGACACAGTATCTTTAAAAGTAAGAATGGTAGATTGTGTTGGATACATAGTTGAAGGAGCTTTAGGGCATGAGGAAGGTGGAAAACAAAGATTAGTATCCACTCCTTGGTCACAAGAAGCTATGACATTTGAAAAGGCAGCAGAG…
HS-FS-000016-I-01_65_112	ATGAAAGAATTAAGAATAGATCCAATTACTAATGATGTTGTTATATTTGCTACAGATAGGTTAAAAAGACCTTTAGATACAGCAGATATCCCAAATGAAGATGAAGAAACTAATGAATATGATGAAGAATGCCCATTTTGCAAAGGAAATGAAGCTCATGCAACTGATGCATTATTTGAAATAGAAAGTGAAGAAGGATGGCTTGTAAAATCTGTCTACAATAAATTTCCTATAATTGATGATATGGCAAGAGATGTATATGGTGTTCATGAAGTAATGATAGAGAGCGATAAACATAATCGTAGTTTTTATAACATGAGTCAAAAAGAATTTGAAGATGTTTTTTTTATGTATAGAAATAGATTTAGAGATTTGTCGAAAGATGATAAAGTAGAGTAT…
HS-FS-000016-I-01_64_49	ATGGAAGGAATGTCAACTAAAGGACAAATTATAAAAGGAAAACCTGTAGCTGATAAAATTAGTGAAGAATTAATAAAAGAAGTCGATTTACTAGTTAAAGAAGGTATAAATCCTAAACTAACAATAGTTAGAGTTGGGGCAAGAAGTGATGATTTATCTTATGAAAGAGGAGCACTAAAGAGATGTCAAAACATAGGTATAACAACAGAAGTGTTAGAGTTAGCTGAGGATATAACACAAGAGGAATATATTGATGTATTAAAGAGAGTTAATGATGACAAAAATGTTAATGGTATATTATGTTTTAGACCTCTTCCAAAACACTTAAATGAAGAAGTTATAAAATATGTTATTGCACCGGAAAAAGACGTAGATTGTTTTAGTCCAATAAACTCTGCT…
HS-FS-000016-I-01_71_133	ATGAATATATTACAAAATGAAAATTTAATTATCGAATCAAGCAGTTTTGGTGCTGAACTAACTAAAATATTTTCTAAAAAATACGACAAAAACATTCTTTGGGATGGTAATAAAAAATATTGGGGTAGACAATCACCTATATTGTTCCCTATAGTAGGTAAACTTTTTGATAATGAAACAATAATAGAAGAAAATTTATATAGCATGACTCAACATGGGTTTGCTAGAGATATGGACTTTGAGATTGTAGATAAAGGAGATACATTTGTATCTTATAAATTAACAGATAATGAATCCACTTTAAAGAAGTATCCATATTCTTTTGAGCTAATCATAAACTATACATTAAATGATAATAGTATTGAGGTAGAATGGATTGTAAAAAATACTGACTCTAAA…
HS-FS-000016-I-01_75_81	ATGAGTAAGGTAAATATATTTGAAGTTGGTCCTAGAGATGGATTTCAAAACCTGAAAGAGTTTTTAGAAACTGATAAAAAGCTTAAGATTATTGATGGTCTTATTGCTTCAGGGATTAAACAACTTGAAATTAGTTCATTTGTAAGCCCAAAAGCAATACCTCAGATGAAAGATGCAAAAGAAGTAGCAACTTATTGTGTAGAAAAATATCCTGATGTGAAACTTTATGCATTAGTTCCAAATTTATATGGTGCTAAAGTTGCATGGGAGTGTGGTATAAGAGATATATCCTATGTTATATCTTTGAGTGAAACTCATAATAAAAAAAATATAAATCGTACCCATGAAGAGTCTATTGATGAGCTTAAAAAAATAATGAATACTTATCCAGACATGAAT…
HS-FS-000016-I-01_72_31	ATGTCAAATCAATACGATATAACTGTTATTGGGGGAGACCTGCGACAAGTGTACATGGTAAAAAAACTAATTAATAAAGGGTATTCTGTAGTCACTTATGGGATATCAAATGAAATTATAAATGGAATCGTTGGAAAATCAACTTCACTAGCTGAAGCACTATCCAAAAGTTCCATTATTTTATGTCCAATTCCATTTACAAAGAATCAAGTTAATATTGAAAATACGGATGATTGTCTTGATGCTACTATTGATAACTTGCTAATTAATTTATCTCCTAATCAAATATTATTTGGAGGTAACATACCAACTAAAGTTTGTAAATTTTGCGAGCAACACTCTATTCAGATTTATGATTTTATGAAAATGAATGATGTTGCTATTTTAAATGCAGTTGCT…
HS-FS-000016-I-01_68_116	ATGAAAATATTAATAACAGGGTCTAATGGTCAATTAGGAAAAGAATTGGTTAGCCAATTAGAAGCAATCAATCAAAGTATAAATCAACCAAAATACGTTATATTAGCTACAACAAGAAATGATTTGGATATATCCAATCAGACTAATATAGATAATTTTATTTTGCATAATAAACCTGATGTAATTGTAAACTGTGCAGCATATACAAAGGTTGATGCATGTGAAGATAATATCGAAATTGCGTATAAAATAAATGCCTTAGGAGTGAGAAATTTAGCAATAGCATCAGAAAAAGTTAATGCTAAGCTTGTTCACATATCAACTGACTATGTATTCAATGGTTTTTCTAAATATCCATATAGGGAAGACAATAAAACTGAACCCAATTCTGTGTATGGA…
HS-FS-000016-I-01_76_24	ATGGCTAAGGAAAAAAAGAAAGAAAAAAAAGGTTTTTTTAGTTTTAATAAGATGACAAAGGATATGGGAATAGATTTAGGGACTGCAAATACATTAGTTTACATAAAAGGACAAGGTATTGTTGTTAGAGAACCATCAGTTGTCGCAATAAGAGATGATAGTAAAGAGGTATTAGCAGTAGGTGAAGAAGCCAAAAAAATGATAGGTAGAACACCAGGAAATATAGTAGCTATAAGACCTATGAAAGATGGAGTAATAGCTGATTTTGACATAACTCAATCAATGATTAGCTATTTTATACAAAAAGCGGCTGATAAAAAAGGTGTTGTAAGTCCAAGAATAGCTATATGTGTTCCTTTTGGAGTTACAGAAGTAGAAAAGAGAGCTATAGAAGAGGCT…
HS-FS-000016-I-01_65_175	ATGTTAGGAATAATTGCGCCATCTGGGCCATTAAGAAATACAAGTTTGGAGGAAATAAAGTTTAATTTAGAAAGTTATGGTTACGAAGTTAAGTTTTCTGAAAGTTGTAGTTTAAATTATAAAGGTTATTTAGCTGGTAATGATGATATTAGAGCAAGGGATATAGAAGATATGTTTTTAGATAAAGATGTAGATATAATTATGTGCTTAAGAGGAGGTTATGGAACAACAAGAATATTGGATAAAATAAATTATGATATAATAAAGCAAAATCCAAAACCATTTATAGGTTTTTCTGATATAACAGGTTTAAATTTAGCTTTTTATAAAAATTGTGGACTTTTACCATATCATGGAATAATGGCAGCAAATGTAGGTAAATGGGATAAATTTACCTAT…
HS-FS-000016-I-01_82_20	ATGAAAATACTAGGTATTTCTTTTGGAACAAAAAATGGAAATAATGACACAATGTGTAAAGTTGCACTTAAAGGTGCCAAAGAAGCAGGGGCTGAAGTAGAATTTATTCAAATGTCATCTATTAACATTAAACATTGTACTGGATGTTGTGCGTGCGTTAAAACTTTATTATCCGGGAAAGGTAGTATGTGTGTATTAAAAGATGATTTTGAATGGTTGCTTGACAAAATGAAAGATGCAGATGGTATAGTAGTTTCAGACCCTATTTTTGAAGAAGGGGCATCAGGATTATTCCATACTATAATGGACCGTTTTGGACCCAGAGCAGATAGAGGAAATAACATTATAGGAACAAAAGTTGCAGAAGCTATAGGAGGAAAAATTCCAGACTCAAGAATG…
HS-FS-000016-I-01_64_253	ATGGAAATTAATAAAAAACATTTTATTCAAGTATTTTTAACTTGCTTAATCTTGGTAGTAATATGTGAATTTATAGGGCAAAGAACTATAGCTATTGGAAAAGCCTCTATAGTACTGTTCCCTATGCTTTATGCAGTTATAATTGGACTTATAATAACACCAGATTTATTAGGTAAAAAAATTAAAGCACTTAAAAAAGTGGTTGGAGAAAAAGAAATAAATATTGCTGGTGAAGTTGTTGGAATTGCACTAGTAATGCTTGGTATAAAATATGGTACTACAGTTGGACCAAACATTGACAAAATAATTCAAGCTGGACCAGCATTTATCGCTCAAGAATTTGGTCATATACTTGCACCAATCGTTGCATTACCTCTTGCATTAATGTTTGGAATGAAA…
HS-FS-000016-I-01_79_10	ATGAAAAGAAAATCTTTTTTAGCATATCCATATGTAGTTTGGAGTGCGATATTTGTAATAATTCCTTTAATATTAGTGGTATTTTTTAGTTTTACAAAAGAATCAGGTGGAGGTTATGCCTTTACACTTGAGAATTATAAAGAAGTAATTGACCCTATATATATGAAAGTTTTTGGGCGTTCTATTCTTTTAGCAGGAGGAGCTACATTAATATGCCTTATAGTTGGTTATCCAGTGGCATATATAATTTCAAAGGCTCGTGTAAGTAGAAGAGGTTCATTAATATTATTGTTTATTCTTCCTATGTGGATGAACTTTCTTTTAAGAACATATGCATGGGTTGCTATATTAGGAAAAAATGGACTTTTAAATACATTTTTAGGTTGGTTTGGAATACAA…
HS-FS-000016-I-01_66_26	TTGGCAAATTATTTTTTATCAAAAGGTTATTGTGTTTCAGGCTTTTATGGAAGGAATCAATTATCTTTATTAGAATCAATAAATTTAACAAAAACAAAGATTTACAGCAATTTGAGAGATATAATTTATGAAAACGATATATTATTTATTACAACATCAGATGATTCTATTGAAATTATAGACAAAAAACTTTCCAAATTTAATTTAAAACATAAATACATTTGCCACACAAGTGGCTCTTTAAAATCTAGTATATTGTTCTGTTCAAAAAAAGCAGGTGCATTAATTTATTCTATCCATCCTATATTTGCATTTTCCAATAAAAATACCAACATAAAAAAAATGAAAGACATTTGTTTTTCCATAGAAGGTGATAATGAACAAGATGATTTAGTTATT…
HS-FS-000016-I-01_73_9	ATGAAATTGGGATTTATTGGATTAGGAATAATGGGAAAGCCAATGGCAAAAAATTTATTAAAAGATGGATGTAATCTTTTGGTGTATGACATTAATAAATCTGCTGTGGATGAACTTATATCATGTGGAGCAAAATACGCAAGTGTTTTAGAAATGGGTCAAGAATGTGATATTGTATTTACAATCCTTCCAAATGGAACTATTGTTCAGGATATATTATTTGGGATGGATGGATTGGCAAAAACTTTAAAAGAAGGAAGTATAGTAGTCGATATGAGTTCAGTTACTCCTACAGAATCAATATTGTGTGCAAATAAATTAAAAGATATGGGCTTAGAATTTATAGACTCACCAGTAAGTGGAGGGGAGCCAAAAGCGATTGATGGTACACTTGCTTTT…
HS-FS-000016-I-01_68_164	ATGAATAGAGAAGAATTAATAAAAGAGAATATGCCTCTTGTAAAGAGTATAGCAAGAAAATTTTTTATACCAGGGAAAGGTTTTGAATATCAAGACTTAGTAAATAGTGGAGTCATTGGATTGATTGATGCAATAAATAAATTTGATGCTGAAAAGGGGGCAAAGTTTTCTAGTTACTCTTATATAAAAATAAAATCTGCTATATTAGATGAAATTAGAAATCAAAGTCCAATTTCTAAACATAATCTAACTAAAGTAAATAAGTATAATAGAGTGGTAGAAAAGTTGCAATCTAAATTATTAAGAGAGCCAACTTCATATGAAATTGCAAAAGAATTAAATGTTTCAGAAAAAGAACTTCATGATATCGAAAGTAATATAGACATGTTAAATATTGTA…
HS-FS-000016-I-01_68_109	ATGTTATTATATGAAGGAAAAGCAAAACAAGTATATTCTACAGATAATGAAAATGAATATGTTGTTTATTATAAAGATGATGCAACAGCATTTAATGGAGAAAAAAAAGCAGAAATATCTTCAAAAGGTATACTAAATAATAAGATATCAACAATAATCTTTGAAATGTTAAAAGAAAATAATATAAATACTCACTTTATAAAAAGTTTATCAGATAGAGAAATGTTAGTTAAAAAAGTAGAGATTTTACCATTAGAAGTAATAGTAAGAAATATTGCTGCTGGTTCTATCTGTAAAAGAGTTGGTCTTGAAGAAGGTGTAGTTTTCGATGAGCCAATTTTTGAAATAAGTTACAAAAATGATGCTTATGGTGACCCAATGCTAAATGATGATTATGCA…
HS-FS-000016-I-01_65_265	ATGGTTAGAAGTGGATTTTTGCTAGAGAATATATATAAGAAATATTTAGTTGATAATAAAGAGCATTTAGTTCTTGATAATATATCTTTAAATATATCTAGTGAAGAGATAACTGTTATATTAGGTGAAAGTGGATGTGGGAAAACAACGCTACTTAGAATTTTAGCAGGGCTTGAAAATGCTACTAGTGGAAACATATATTTTTTTAATAATGATAAAAAGTGTACTCCAAAAGTAGGAATGGTATTTCAAGAAAGTAGACTTATGCCATGGCTGAATGTAAGTGAAAATATACTTTTACATACTGAAAAAGATAATAGAAATAAAGTTGATTTAGACAAGTATTTAAAAATGATGAAGCTTGAAAAGTTTAAAAACTCATATCCAAATGAATTATCA…
HS-FS-000016-I-01_77_38	ATGAAAAATAATAATTTAAATTGTGCTGCTACTAATTGTGCTTATAATACTAGTGGATATTGTTATGCTGGTAGTATAAAAGTAGATGGAATGCAAGCAACTACTACAGAAAATACTTATTGTGCTTCTTTTGAAGACAAATATACATCTGGTATAACTAGTCGTTCTAATGAAACTAACCAAGTTGATACAGATAACATTCATTGTGAAGCTGTAAAATGTAAATACAATAAAAATGAACTTTGCAAAGCTGAAAAAGTTCATATAAATGAAAGAAATGCAAGTTGTGAAACTTTTGAAATGAAATAA
HS-FS-000016-I-01_72_39	ATGGCTTTTGAAATAATAAAAAGCATTGTTGAGGCAGAGCAGACAGCAGACAGTATCAAAGTAAAAGCTGTTACTGATGCAGAGTCTATCAGAGCTGATGCTGTAAACAAATGTGAAAGCATATTTGCTGATGTAAGAAAACAAGCAAAGCTTATGGAAGAAACTCTTATTGAGAAGGCAGTCACCGACAGTAGAGCAGAGGTTGATAAAATCTTAGCTAATGCTAAAAGTGAATGTCTGAAAATTGAAAAAACTGCTGAAGAAAGAAAAAGTAAGGCTATTGAAGCGGTTATTGGAAAGGTAGTGAGATAA
HS-FS-000016-I-01_77_97	TTGAATCAAAATATATTGGTTGTAGATGATGATAGAGAGATAGTTGATGCTATAGAGTTCTATTTGAGACCTGATAACTTTAATGTTTTAAAGGCATATGATGGACTTGAAGCATTGGACATACTAATCGAAAATGATATTAAGTTAATAATAATGGATGTAATGATGCCCAATTTAGATGGGCTTAAAACTACACTTAAAATAAGAGAAAAAAGGAATATACCAATAATTCTCTTATCTGCAAAATCAGAAGATATGGACAAAATTATAGGTCTTAATATGGGTGCTGATGACTATATAACTAAACCATTTAATCCACTAGAACTTACTGCTCGAGTAAAATCTCAACTTAGAAGGTATATAAATTTAGGTGATTTTAGTAATACAAATAACTCAAAT…
HS-FS-000016-I-01_73_51	ATGAATGAGCCTTTAGTATCGATAATTACTCCTGTTTATAATTCAGAAGAGTTTTTATCAGAGACGATAAAGTCAATCCAAAATCAAACTTATAAAAATTGGCAGCTTTTATTAGTGGATGATTGTTCTAAGGACAATTCAAGTGAAATTATAAAAAGTTTTCGAAAAGAAGATGCTAGAATAAAATATATAAAGCTTGAAAAAAATTCTGGAGCTGCAGTATCTAGAAATGTTGGTATTAAGAATGCGGAAGGTCGATTTATTGCATTTGTAGATAGTGATGATTTATGGGATAGTAGAAAATTAGAGATTCAGATAGAATATATGTTAAAAGAAAATGTAGGTTTTTCTTTTACATCTTATAGATATATGAGACAAGATGGGTCAAAAACGAATAAG…
HS-FS-000016-I-01_63_629	ATGGAAAATATAGATGTATTCTTATTAATAGGACAAAGCAATGCTAGAGGATTGGGAAATCCAAAAGAGAGCATCATTCCAAATGAAAATTGTTTTGAATATTTGAGTACTGATGAAATTATAAATATGAGATGTGAGCTAGAGACTTCAGAAGGTGATGGTACTATAGCACCTGCATTTTCAAATGAATGGAATAAGCTTACTGGAAATAAAGTTTGTTTTATTCACAATGCAAAAGATGGTTCAAGAATAAAAAACTGGAATCATGATAATAACTGGTTTCTAAATGACACTATAGAAAAATTTAATACAGGCTGTACTACCTTAAGTAAACATTATAATATAGAAAATAAATACGTTATTTGGATTCAAGGTGAAAGTGATGCAAAATATGGTAGT…
HS-FS-000016-I-01_74_61	ATGGATAGAGTAGCATTTACACTGTTTGGCATAGACATCATGTGGTATGGAATACTTATGGCATGTGGAATGATTTTAGGAACTTTAATAGCAATAAAAGAAGCAAAAAGAGTGGGAATTAAAGATGATGATGTATTAAATATAGCTATAATAGCAATTCCAGTTGGACTAATCTGTGCAAGAATCTATTATGTTGTATTTAATTGGAGTTACTATGCTCAAAATATGTCTCAAATTTTTAATTTTAGAGGTGGTGGACTTGCTATACATGGAGGGTTAATTGGTGGAATATTAGCTGGTTATATATACACTAAGATTAAAAATATTAACTTCTTAAAAATGGCTGATACAGTTATACTTGGAATGCCTTTAGCACAAGCTATTGGAAGATGGGGAAAT…
HS-FS-000016-I-01_67_44	ATGGATAGATTTTTTGTTGAAAAAAATAATATAAATCTACAAGATAAAACTTGCACTATAGAAGGTGAAGATGTAAAACATATTTCAAAAGTTTTAAGATGCAAACTAGGTGAGAAACTTGAAATATGTGACAAGAATAATAATGAGTATATTTGTGAGATAATGAATATAGATAAGAGTATAGTTAATTTAGAGATTTTAGAAAAAGTTGATATAAATAGAGAATCAGAACTTAAAGTAAGGTTATACCAGGGACTTCCAAAAGCTCCAAAAATGGAAATGATACTTCAAAAATTAACTGAAGTGGGTGTAGAAGAAATAATATTAGTTCAAACTAAGAGAAGTGTTGTTAAAGTTGATGACAAAAAAGAAGATAAAAAATTTGAACGTTGGGAAAGA…
HS-FS-000016-I-01_73_84	ATGGGTCGTAAGGTGAAAATAGGTATAATTCAACAACACAGTGTACTTGGAGATGTTAAAAAAAATATAGAAAAAGCAGTAGAGATGATAGATGACTTAGGAAAACATGGGGCAGATATAATTTGTTTACCAGAACTATTTGCTACAGGATATAATTTAGAGTCTTTAGGTGGAGTTAAAACATTAGAATTAATAAGAGAACATAATAAGTACATAGAGGAATCAATGTCAGAAGCTGCTAAAAGAAATAATGTATACCTGATATCTCCATATGGAACCTTAGAAAAAGGGTCTACACATGTTTATAATTCAGCAGTTATATTTGATAGAAAAGGTAAGATTATGGGAGAATACTGTAAAAATCATCTGTGGTCATTAGAAGCAGTATACTTTAAAGGA…
HS-FS-000016-I-01_63_78	ATGATTGTTTTTTCAGATTTAGACAGGAGTATCATTTACTCCAATAAATTTTTAAATGCTGATAGTAAATATGCTAATATAGAAATTTATAGGGAAAAAGAAATATCTTATATATCTTTAGATACTATAAATTTAATAAAGCAAATACAATATTATGGTATGTTTATACCTACAACTACTAGAACAGTGGAGCAATTTAAGCGTATAGAATTTAATAAATATGGGATTTATTTTCCTTGGAGTATAACTTCAAATGGAGGAGTTATACTTAAAGATAATGAAATATTGAAATCATGGAGTGAAAAAATAGATAAACTAAAACCTGATTATGAGCCCATTGAAAGTATGATTCATAAATTTAAAGACTATTTGAATGTAGATGGAATAACTAATTTTAAA…
HS-FS-000016-I-01_84_60	ATGCCACAGATAAAAATAAGAGGAATTAATGAAAATGATATATGTAAAATAAGTAAAAAAATGATAAATGATTTAGTTGAAGCTGTAAAATGTCCAAGAGACTACTTTGAAATAGAATGTATAAAGTCAGTTGCAATAAGAGATGGTAAAATAGCAGATGTATATCCTTTTGTTGAAGTAGCTTGGTTTGATAGAGGACAAGAAGTACAAGATATAGTAGCAAGAATAATAACTGATAGTATAAGAAATAATTTAGATGTAGAAAGTATGGATTTAGCATTTACAGTATTTGAAAAAGAAAAATATTATGAGAATGGAGAGCATTTTTAA
HS-FS-000016-I-01_77_58	ATGTTAGATTTAGATAAGGCTACATTTGAAGAAGAAGTTTTAAATGCAGAAGGTTTTGTATTTGTTGATTTTTGGAGTGAAGGTTGTGAGCCTTGTAAAGCTTTAATGCCAGATGTTCATAAATTAGCTGAGACTTATGGGGATAAAATAAAATTCTGTAAGATGGATACAACAAAAGCTAGAAGATTAGCTATAAAACAAAAAGTATTAGGTCTTCCAACTATGGCTATATACAAAGATGGAGAAAAAGTAGACGAAGTTACTAAGGATGATGCTACAGTTCCTAATATAGAAAACATGATTAAAAAATATCTTTAA
HS-FS-000016-I-01_80_28	ATGATACAACAAGAATCACGTCTAAGAGTTGCTGATAACTCAGGAGCTAAAGAACTTTTATGTATACGTGTTCTAGGCGGAAGTAAAAGAAGATATGGTAACATAGGCGACGTTATAGTTGCTACTGTTAAAAGTGCAACACCTGGTGGAGTTGTAAAAAAAGGTAAGGTTGTTAAAGCTGTTATAGTAAGAAGCAAACAAGGCGTAAGACGTAATGACGGAAGCTATATATCTTTTGATGAAAATGCTGCTGTTATAATAAAGGACGATAAAACTCCAGTAGGAACTCGTATATTCGGGCCTGTTGCTAGAGAGTTAAGAGACAATGAATTCATGAAAATAGTTTCTCTTGCTCCAGAAGTACTATAA
HS-FS-000016-I-01_74_4	ATGTCAAGTAAATACAATGTTTGGACTTTTAACTATGAGTTCTTAGGATTGGACTCAGGGGATGAAAAAAATAATGAAGTTTATTACGAGATTGATTTAGATGAAATTTTAAATGAAAACTATATAGATGAAGATATAGATAGTGGTTTAGATTCTGATGGAAATAGTATTTTAGGAGAATTAATATCAGAAATGGATATAGATGAGGATGTCAGTGTTGATATGACATATCAAGAACTAGAAGTTGACTTAGAAGATTTAGATTCTTATCTAGATGAAGATATAGATAGTGATATAAAAGGCATCTTAGATGAAATTTAG
HS-FS-000016-I-01_84_8	ATGGAATATATGTCTTGCCCAGAAGTAGCAAAAAAATGGGGCATTTCTGAAAGAAGAGTACAAAAACTATGTGAAGAAAGTCGCATACCAGGAGTTTCAAAACTCGGGTATATGTGGCTGATACCAAAGAACGCAGAAAAGCCTGTTGATGGTAGAGCGAAAAGAAGAAAGGAAGTACAATATGAATAG
HS-FS-000016-I-01_76_56	ATGGCAGTACCAAAGCGTAAAACGTCTAAATCAAACACAAAAATGAGAAGAGCAGCTAACTCAAAGATGGAAGCAACAGGATTTGTAAGTTGCCCACAATGTCATGAGCCAAAATTACCACATAGAGTGTGTCCAGACTGTGGATATTATAAAGGTAAAGAAGTTGTGTCTAAGTAA
HS-FS-000020-I-01_63_677	ATGAATTTCATATGGGATAAAGGCATAGATAAAATACCAGCCAGAGAAGTAGCTAATTATATGGAAATTTCTCATGGATGGACAAAAGGTACTACTGGTAAAGTACTTTCTAGATTAAGTGATAAAGGTTTTTTAGAATTTGAAAAAGATGGTAGAAATACTTTATACACTATTAAAGTTAAACATGAGGAATATCTAAAATTTGAAACAAAGGATTTTTTAGAGCTTATACATAAAAATTCTATTCATAGCTTTATATCATCATTAGGTTGTGGAAATGAAATATCAGATGATGACATAAAAGAACTTGAACAATGGCTAAAAAAAAGAAAATAG
HS-FS-000016-I-01_64_33	ATGATTTTTGATAAAGAGATTGTAAGATATCATCATGGACATCATGACCATGACCACTGCCACGAACATACTCATGGAGATATATGTCATGAACATCCACATGACCATGCTCACGACCACGACCATGAACATAGTCATGAGGAATCATCAGAGTCTAAGGATGAAAAAACTTTAAAAATACTTTTAGTACATTGGATAAATCACAATGAAACTCATGAAGAAGGATTTAGAGAGTGGGTTGAAAAGGCTAGAGCTATTGGAAAAGAAGAAACAGCAAAGAGTATTGAAAAGGCTATAGAGTATATGGAAGAAGCTAATAAAATGTTGTTAGAGGCTAAAAAACATATGTAA
HS-FS-000016-I-01_71_105	ATGAAATCAGATTTATATTTATGTAAAAGTAATAAATTGTATAGAGACAACGAAGTTCTAGAAAAATTTATGGAAGATTTAAGTTTTCTTATAGACGATTATAAATTCTCGTTAGAAACAATATCTATTCTATGCAAAATAAATATTGAGAAATTAACTAATTTCTATGCAGGAAAAGGATATATACTGTATGAAGAAATGTCTCTTATTGAAAGTGTACTTGCACCTTTTTTAAGTGCAATTGATATTGCTAAACATAATTATGATGTTGTCATTAAATCGAGGGAAAGCGATAAACCTTTGATATTCGAAAATTAA
HS-FS-000016-I-01_63_215	ATGATTAAATTATATGGATATACAAAATGCTCTACTGTTAAAAAAGCTAAAAATTGGCTTAAGGAAAATAATTTAGAATTTGAAGATATAGATATGGTTCAAAACCCTCCTAGTAAAGAGGAGTTAAAATCAATTTATAAGACTAGTGGATATGATATAAAGAAATTTTTTAATACAAGTGGTATGAAATATAGAGAATTGGGTCTTAAAGATATTGTAAAAACTGAATCTGATGATAAACTTTTAGAAATATTGGTAAGTGATGGTATGCTTATTAAAAGACCATTACTTTTGGATGGTAAAAATGTATTATTGGGCTTTAAAGAAGATGTATGGAAAAGTACTTTGCTAAAAGAAGATTAG
HS-FS-000016-I-01_75_35	ATGGATAGAAAACGTGAATTAAAACAATTATACAAAGAAATGAAATTTGACACAGGTGTATTCATAATAAAAAATGATATTACTAAAAAGATTTACCTTGGAAAAAGTAATGACATAAAAAGCAAATTTAACTCTCTCAAATTTCAGCTTGGTGCTGGCTCATGTATGATAAAAGAATTAAATAATGAATGGAAAAAATATGGTGAAAAAGCATTTACATTTGAAGTTTTAGAACTTATAAAACATGATGATAACAAAACAGAGAAAGACTATTTAGAAGAACTAGATATTTTAGAGATGATTTGGTTAGAAAAATTAAAGGAAGATAATACTTATGAAATTTATTCCATATAA
HS-FS-000016-I-01_89_6	GTGGACAAGGGAATTTGTGATAAAAATTCAAAACAAGTGCTTGAAAATATTCACAATAAAAAGATAGCACTATTTGGAACAATGGGAGCAAGTAAAAAAGGAAGTTATGGAGCTAGTATAATAGAAAAGATAGAATCAATTATCCCAAAAGATAATGAAATATTAGGTTCATTCATATGTCAAGGTAAGATAGCAGAAGGATTGAAAGCAAAATATAAAGAGATGTTAAAACTTTCTCCTGACAACGAACATATTCGCCAACAATTAAATAACCATGAGGAATCTCAAAGTCATCCAGATGAACAAGAAATATATGAAGCCAGTATGTTTGCAAAAAATATGATGATTAAAGCTAGTATTGTGTAG
HS-FS-000016-I-01_88_4	ATGGCTAAAAAAGGTTTTGGAGGCGGAATGATGCCTGGTGGTGGAAATATGAACAACTTGTTAAAGCAGGCTCAAAAAATGCAAGAAAATATGCAAAAAGCTCAACAAGAGTTAGAAAGTAAAGAAGTAGAAGCTTCAGTTGGTGGAGGAGCAGTTACTGTAAAAGTTAATGGTAAAAAAGAAGTTATAGATATAACTATCAAGCCAGAAGTAGTTGATCCAGATGATATAGAAATGCTACAAGATTTAGTTTTAAGTGCAGTAAATCAAGCATTGAGAAATATTGATGATATACAAGCAAGTCAAATGAGTAAGGTAACTGGAGGTATGAATATACCTGGGTTATTCTAG
HS-FS-000016-I-01_69_92	ATGAACAATATATACTCAAAAACTAAATTACAAGAAAATAGTAAGGATAAAGTTTTTGAAAATAGTTATAGTCTAGTGGACTACAAATATTTAAATTCTTTTAATGTAGAAGTAAGCAAAATAAATGAACATGAAGTATCAATAGATAATGAAGAAATAATTGCAGAATATCCACTTAGTTTTATTTTAAATGATAAATATGTAAATACATTTTTATGTACCCCATATAATTTAGAGGAACTTATAGTAGGATTCTTGAAAACAAAAGGATACATAGAAAACAAAAAAAGCTTATTAAAATTTGAGATAAATGAGAGTGAACGTTTTGCAAAAGTAACTATTCAAGAGAAACAAAAAAATCAAGATGAGCAAATTATATTTTTAAATTCACTAGACTAT…
HS-FS-000016-I-01_70_109	ATGAGCAAAAGTGAATTAACGGCAGAAACAACAGAAGAAATGTTAGAAGTACTAAGTGGTAAAGATTATGATATTGCATGTCATTTACATGAACTTGGTAAATCATTAGATTGTAAAATTGAACCAAAAACAGGTGCTCGTTCTTACAAAATAGTATATTCAACTAAGAAACCAAAACGTAGCTTATTTACTATTGAATGTAATGAAAAAAAATGGAGAGTTAAAGCAAATCTTTTTCATCTAAATACATATAAAGATGCTGTGGAGGAATGCTCTAAAACTATTAAAGATAGTATAACTAAAACTCGTACTTGTAAGAAATGTAATTCAAAGTGTATTGGAGGTTCTTCGTTTGATTTAGATGGAAAGTCTTATCTGACTTGCATAGGAAGTGGTCAT…
HS-FS-000016-I-01_70_84	TTGAAACTTCGTGATGAGTATACTTGCCCATTAGAACTAACACATGATATGATAAAAGGCAAATGGAAATCTATTATATTATGGAGATTACGCATAGGACCAACCTCCTTATCAAAACTTGAAAAGGAAATCAATGGTATTAATCAAAAGATGTTACTTGAACAACTTAAAGAATTAATTGAATTTGGTCTTGTAGATAAAAAGACATATAAAGGTTACCCACTTAAAGTTGAATACTCACTTACACCTATTCGAGGGAAACAAATATTGGATGCTTTGGCTATAATGCAAGATATAGGAATTAGCTTTATGTTGGATAATGGTATGGAAGATATTCTTAAGGAAAAAGGTGTTTTAAAATAA
HS-FS-000016-I-01_76_107	ATGAGTAATATAGTTAATGATTTGGTTGAAGATTATATAAGAGTGACATTAAAAGAAAAAGAAGGATTTTTAAAAGATTTAGAAATTTATGCAGAGGAAAATAGTGTTCCTATAATACATAAAGAAGTTTCAGATTTATTAAAAGTCTTGTTAAAGGTTCAAAAACCAAAGAGAATTTTAGAAGTAGGATGTGCAATTGGTTATTCTTCTATTTTTTTTGCAAGTATTATAGGAAAAGATGCAGATATAATAACTGTTGAGAGAAATGAAAAAATGATAGAAAAAGCAAAAGAAAACATAAAATTAGCTGGATTTGACAATAACATAACTATACTAGAAGGAGATGCAGAAGAAAAACTTAGTCAAGTCCAAGGTGAATTTGACCTTATATTTATAGAT…
HS-FS-000016-I-01_69_123	ATGAGTATTATGAGCAACTATAATGAAGCAAGTTCAAATTATTCAATGTTTTATAAATTTAAACAAAGTATTAGAAGGTATTATGAAGTAGCCAAAATTAACTTTAAAGTGCAACTTATCTGGAGATTTGATGTGGTGGTTAATATGGTGTTTACGATTGTAAAAATTTTATTTGCTTATATTTTATGGAAAGCAATTTTTGGTGAAAATAAAATAGTCTCTGGTTTTACATTTAACTCTATGTTGTCTTACTATATAATAAGCTCATTTTTAGCAGGTATTGATATGTCAAAGAGTACCAGTGAAGAGATATGTAATCGTGTAAAATTGGGCACATTTTCAAAGTACATGATTATTCCAATTAATGTTCAAAATTATTTTATTGCTAAAAATTTTGGA…
HS-FS-000016-I-01_69_179	ATGTGCGATTTTATTTCACACAACAAGCAATTATTTGACGAACTAGATATATTTATTGACTCTCTTACAACAAAGGAAGGTGCGTTAATACAAGTTCTACATGAAGCCCAAGGTATATTTGGATATCTTCCAAAAGAAGTTCAACTTCATGTTGCTAGAAAACTTGGAGTAGCTCCTGCAAAGGTATATGGGGTTGTTACATTCTATTCTTATTTTACTACAGAACCTGTAGGTAAGTATAAAATCAGTGTCTGTCTAGGAACTGTATGTTTTGTAAAAGGTGCTGACAAAATCTTAAGTGCTTTTGAAAAACAGCTTGGCATAAAAGTTGGAGAAACTACTAGTGATTTTAAATTTTCTTTAGAGGGTTTAAGATGTTTGGGGGCATGTGGTTTAGCT…
HS-FS-000016-I-01_69_75	ATGAAAATTAGAAGTTCAGAGATAACTATGAGTGCTGTGAATAAATCACAGTATCCAGCAGAAGGAATCCCAGAGATAGCATTGGCTGGTAGGTCAAATGTTGGAAAATCATCAATAATAAATACATTGCTTAACAGAAGAAACTTCGCTAGAACCAGTCAAACACCAGGAAAAACTAGAACTATAAATTTTTATCTAATAAATAATGAATTTTATTTTGTAGACCTTCCAGGCTATGGATATGCAAAGATAGCTAAGTCTGAAAAAGAAAAGTGGGGAGGTATAATGGAAAGATATCTAGAAAGTAGACAAGAGTTATGTTCTATATTCCTACTTGTAGATATTAGACATGAGCCTACAGCAGATGATAAGCTTATGTATGAATGGATAAAGCACTTT…
HS-FS-000016-I-01_69_73	ATGGAAGGAAAGGTAAAGAAGGCATTCCCAGGTGGAAATACATCACAAGGCTCATATTCTTTTTTTGACTATATAATTCCTGAAAATGTAAAAAGAGTTTTTTGTTTAAAGGGTGGACCTGGAGTAGGAAAATCCTCACTTATGAAAAAAATTTATAAAGAGTTTTTGCATAGAGGATATGATATTGATTTATATCATTGTCCTTCTGACCCAAGTTCGTTGGATGGTTTAGTTATAAAGAAATTAGGCGTGGTACTTATGGATGCAACTGCCCCACATACTATGGACCCAAAGCTACCTGGAGCTTTGGATGAGATAATTAATTTAGGTGATTACTGGAATACAGAAGAATTAGAAAAGAATAAACAAGAAATATCAGTTTATGATAAAGATATTAGT…
HS-FS-000016-I-01_66_3	ATGAATAGTTTAATTGACTTTTTAACAACACTATTTCCAAATGCATTGTTACAAACTTTGTATATGGTTATAGTACCAACTATAGTGGCAACAATATTAGGATTTATATTAGCAATCATATTAGTAGTTACAAAACCAGATGGATTAAAACCAAATAGCACAATAAATAGTGCATTAGGATTTATAGTAAATATATTTAGAAGTTTCCCATTTATGATACTTATAGTTGCAATGATTCCAATAACTAGATTAATCGTTGGAACAAGTATAGGGGAAACTGCTGCAATAGTGCCAATAACTATTGGGGCAGCACCGTTTATCGCTAGAATTATAGAAAGCTCATTAAATGAAGTTGATAAAGGATTGATAGAAGCAGCAAAATCTTTTGGAGCTACAAAA…
HS-FS-000016-I-01_72_97	ATGGAAAAAGGGTCTATAAAAATACTTGGAGAAGGCTTTATAAGTAGTGGTGAGTATGAAAATATAAAAATCGTGGGAAGTTCTAAATCAAAAGGAAATGTTAAAAGTAACGAAGTAAAAGTCCTTGGAGATGCAAAATTTGAAGGTGACATCAATATAAAAAATTTTGTTGTTAACGGAAAAACTATTATAAGAGGCAATCTTAAAGCAGAGCGTGTAAGAGTGAATGGTCAACTTAATATAGAGGGAGATGCAGAAATAGATGACTTAGTTATAACTGCTCAACAGAAAGTGGATGGCAAACTTAAATGTAATAATGTTACAATAAGAGGACAATTAAGTGTAAATGAAAATATGTATGCACAAGATATAAAAATCTATGGCGAAATGAGAAATAAA…
HS-FS-000016-I-01_74_78	ATGCAAGTTAATAAGGTTGAAATATGTGGTGTTAATACATCAGAACTTCCAGTTCTTAAAAATAAGCAAATGAAGGAACTTTTATTACAAATAAAAAATGGTGATGAAGAAGCCAGACAACAGTTTGTAAGAGGAAATTTAAGATTAGTCTTGAGTGTAATAAAAAAGTTTAACAACAGAGGAGAAAATATAGACGATTTATTTCAAATAGGTTGTATTGGTCTTATAAAAGCTATAGATAACTTTGATTTAAGCCAAAATGTAAGGTTTTCAACTTATGCTGTTCCTATGATTATAGGAGAAATTAGAAGATATCTAAGAGACAATAACCCAATTAGAGTAAGTAGGTCATTAAAAGATATAGCATATAAGGCACTACAAGTTAGAGAAAGATTAATT…
HS-FS-000016-I-01_64_102	ATGGGATACATAGCATCAGATGAAGGTTTTCCATTTCACGACATACCACTATCTTATATGGAAGAGATGAAAAATCGTAGAATTTCTTTTTATGTATTACATTCTCCACTAGACAACTATAGTGACTATTCAACTTCTGTTAGTTTTGCAAAAGCTATGGGTTTAGAAATAGTCAAACCATTTTGTAAATATGACGATAAAATTGAGGTAGGAGTTATATGTAAAACATCACTAAAATCAATAGAAGAGATTAAGGAATTAATTAAAAAATCTGTTGGTCATGATGTGAAATTGTATGATTATGGAGATTCTGTATTAAAAGATGGTTTAGTTGCTATTGCAGCAGGGGGAGGAAGTTATCCATTTGTAGCAAGAGAAGTTGCTGAACTTGGTATAAAT…
HS-FS-000016-I-01_72_15	ATGAAAATTTTAACTGTAAATAATTTAAGTAAAGTATATGGTAAAAAAATAATTTTCAACGCATTAAATGACATAAATTTTAGTATAGAAGATGGAGAATTTGTAGGAATTATGGGTCCATCTGGTAGTGGAAAAACTACTCTTTTAAATATGATTTCTACTATTGACAAGCCAACTACAGGAACTATGGAATTAAAGGGAAAGAATCCTTTATTGTTAAGAGGTGAGGAACTTGCATTATTTAGAAGAAGAGAGTTAGGTTTTGTATTTCAGGATTTTAATTTATTGGATACATTAACTATAGGAGAAAATATAGTATTGCCATTGACATTAGATAAGGTCAGTGTAAAAGAGCAAGATGAGAGATTGAATGAAGTATCTACAATATTAGGTATAAAA…
HS-FS-000016-I-01_67_66	ATGAAATTTCATGAATTTGGAGATAAAAACAAACCACATATTATGTTGATTCATGGGGGAGGGAATGCGTGGTGGAACTATTTGCGACAAGCAGAAGTTTTGTCTAACAACTATCATGTGATACTTCCTACATTGGATGGTCATGGAGAAGAATATGAAACAACATACATTTCTACAGAGGATACAGCAGATAAGTTGATATCATATATAGATGAAAATTGCAGTGGACATCTTTTCGCTTTGTGTGGGGTATCACTTGGTGGTCAAATTGTCATGGAACTTTTATCTCGAAAACCTAATATTACTAAAAAAGCAATTATTGATGGTAGTATTTGCTACCCAAGACCTCTTATGGCAAGGTTTTGTATTGCTGGTATTCGATTTTTTGGAGGACTTTTG…
HS-FS-000016-I-01_65_114	ATGGAATACATAATTTTCGATTTGGAATTTAACCAAGGATTTGATAAAAAACTCAATAAAACTGTATCCAATGAAAAGTGTCCTTTTGAAATTATACAAATAGGAGCAATTAAATTGGATTCTAAATTCAATATAATAGATACGTTTAATAGCTATGTAAAACCTACAATTTATAAAGACATACATCCCTTTATTAGTCGTATGACTAATATTAAAAATTCTGATTTTAATGATTCGCCTACTTTCCCTGAGGTCTACAACAATTTTATAAAATTTATATCATCACAAGACCCTATATTATGTGTTTGGGGAGTTGGAGATTTAAAGGAATTATACAGGAATATCAACTATCACAAGCTACCATCAAGTTCCTTACCTAAATCTTATATTAATATACAA…
HS-FS-000016-I-01_76_8	ATGTTGATATTAGGACTTACAGGAGGAATAGGCTGTGGAAAAAGCAGCCTATCAAATATATTTAGAAATCTTAATATTTCTATAGTGGATGCTGATATTATATCCAGGAAGATATTTGAGGATAAGTTGTTATTGGAAAAAGTATTTGTCCATTTTGGGCAAAGTATAAAAAATGATGATGGAACTCTAAATAGAAAAGCTCTTGGGAAAATAGTTTTTAGCGATGAAGAAAAACTTAAGGAATTAAATAGCTTGACTCATCCGCGAATAAGAGAAAAAATAATAAGTGAAATAGAAGAATTGAGAAAAAAAGGCGAAAATATAGTAGTATTAGATGCAGCAATATTGGTAGAAAGTGGTTTTTTAGATATGGTTGACAAGCTATTAGTAGTTACTTGC…
HS-FS-000016-I-01_72_47	GTGGCTAGATTAAATATAAATCCAACACGTATGGAAATGACTAGACTTAAGAAACTCCTTAAAACTGCTACAAGAGGTCATAAGCTTCTTAAAGATAAACTTGATGAACTTATGAAACAATTTCTTGAGATTGTAAGAGAAAATAAGCGATTGCGTGAAGAAGCAGAAAATGCTCTTGATACTGCTTATAAAAACTTTATAATCGCAAGAGCAGTTATGAGTCAGGAGTATCTGGGTTCAGCACTTATGATGCCAAAGCAATCAGTTTCAGTAGATGTTTCTACGAGAAATATAATGAGTGTTGATGTTCCTGTGTTTGACTTTAAAACTGAAAACAATCAAAGTGATATTTATCCTTATGGTCTTGCTTTTACATCAGGTGAATTAGATTCTGCTATG…
HS-FS-000016-I-01_63_237	ATGGGTATAACTTTAGCAAAAGGACAAAAAGTAAGTTTAACAAAAAGTAACCCTGGTCTAAAAAAAGTAATAGTAGGACTAGGATGGGATATTAATAAATATGATGGTGGATTTGATTTCGATTTAGATGCCTCTGCATTTTTAACTGGAACTGATGGAAAAGTAACGAATGATGGAGACTTTATATTCTATAATAATTTAAAACACGCTTCTGGAGCTGTTGAATATATGGGTGATAATAGAACAGGTGTTGGTGATGGTGATGATGAACAAATAAATGTAGACTTATCTAAAATACCTCAAAATATTGCTAAAATATCATTTAGTGTTACTATAAATGAAGCAATTACAAGAAGACAAAATTTCGGACAAGTTGAAAATTCATATATAAGAATATAT…
HS-FS-000016-I-01_68_39	ATGCAAAACACAGCAAAAAGAGGCAATATGATTTCAACAAGAACTTTAGTAGTAATGTCAATTTTATCTGCAATATCTTATTTATTAATGTTTATTCAAGCACCAATACCAGGTATATTTCCAGATTTCTTAAAAATTGACTTATCAGATATTCCAGCAATATTCGGAGGAATGTCTCTAGGACCATTAGTTGGATTTGGAATAGTTGTAGTAAAAAATGTGTTACAAGCAATAACAGCAACAACAACTGGAGGAATAGGAGAATTTGCAAATATATTAATTGGTGGTTCTTATGTAATGATACTTTGTTATTCATATAAGAGAAGTGGAGATTTAAAAGGTGTACTGATTGGTTTTGTATTAGGAACAATATCTATGACTATAATTGGTTCATTAGTA…
HS-FS-000016-I-01_68_64	ATGTTGGGAAATAAAAATATATCAATGGCAGTTATAAGAAGGCTCCCAAAATATCATAGATATCTTGGAGACTTATTAGATAGGGATATACAAAGAATATCTTCTAAAGAATTGAGTGATATAATAGGGTTTACCGCTTCTCAAATAAGACAAGATTTAAACAACTTTGGTGGATTTGGACAACAAGGATATGGTTATAATGTAGAAGCTCTTCATACTGAGATAGGTAAAATTCTTGGGTTGGATCGACCATACAACGCAGTTCTTGTAGGAGCAGGTAACTTAGGACAAGCTATAGCCAATTATGCAGGATTTAGAAAAGCTGGATTCGAGATAAAAGCTTTATTTGATGCAAATCCTAGAATGATAGGTTTAAAGATAAGAGAGTTTGAAGTATTA…
HS-FS-000016-I-01_63_545	ATGAAAATAGTAACCTACAATATTCATAAAGGTATGGATTCAAATAATAGATTAACTCTAACTAAAATGGGGTTATATTTAAAACAATTGGATTGTGATGTAATTTGTTTGCAAGAAGTATTATATCCTCAATTTTTAGCTTTAAAAGCTGTTTTAAATATGGATGGTGTCTTTGCTACAAATGTAAAAAAAGTAAATATGATATATGGTATTTGTACATTTACAACATCTAAAATGTTAAACAGTAATCATTTTTTCTTAACTAGCAAAAAAGAACAACGGGGAGCTCTTTGTATAACTATAGATGCATATGGAAGAATTATAAATGTAATAAATACTCACTTGGGACTTGATAGGCAGGAGAGAGCAAAACAATTAGACGAAATAATAGACTATAGG…
HS-FS-000016-I-01_76_20	ATGAATTTAATACTTTTATTTTTAAGTATCGTTCTTGTTAATAACGTTATAACATCTCAATTCTTGGGTATATGTCCTTTCTTGGGAGTTTCTAAGAAGGTTGATACAGCAGTAGGGATGGGAGTTGCGGTTACGTTCGTTTTAACTCTAGCTTCAATTATAACTTATTTTATACAGATTTTATTAGTAAAAACTGGAACTGGATTCTTACAAACAATAGCTTTTATATTGGTTATAGCTTCTATAGTTCAGTTCGTTGAAATGGTAATTCAAAAGATGAGTCCATCTTTATATCAAGCATTAGGAGTTTATTTACCTCTTATAACTACAAACTGTGCAGTTCTTGGTATAGCTCTAGTTAATGTTCAAAAAAGTTATAATTTAGTAGAAACAATAATA…
HS-FS-000016-I-01_77_50	ATGCAGTGGGCTCTGAGTTCAGAGGAAATAGATATAGCAATCATATGTAAAGATGCTGCAAAACAATATGTAAATGTAAATAGTGGATTTGAAATTGTTGGTACTGTAGTTCAAAATTCTGATATATTTCTATTAAGTGATAATAATCCTGAAAAGATAGGAGTCATTCAAAATAGAGATTACCAGTCAGAATTGGTTAAAAAATACTACAAGAATGTGGAAGTAGCTCCATTATTAGGGACTGCACTAGCATATGGATTAGAAAGTAATTTAGTAGATGGTGTTGTAATAGATTGCATAAAGTCAATTGGGTTAGAGGGTAAAAGAAAATCTACAACTAAATTAGGAGATTATGATACCTATGTATTAGTTGTAAGTAAAGAGTTTAAAAAAAGTAAA…
HS-FS-000016-I-01_64_3	ATGGCTTATGATACTAAAAAGAAGATAAGTGAGCAGAGTCAAGGAATTGTTGCAAAAATAGGTATAGCACTAGGAAATGTGACAAGTACTCTTTTTCAAGCTGGTAGGGATACTATAGATACATTAATACATACTATACTGCCTTTTATGGCTTTCGTTGCAGTCCTAATAGGTATAATAAATCAATCAGGTATAGGAAATTGGGTAGCCAATTTACTTACTCCATTAATCGGAAATGTTGGAGGTTTAGTTGTCTTATCAATAATATGTTCATTTCCGTTGTTGTCTCCGTTTCTTGGACCAGGAGCTGTTATAGCTCAGATAGTGGGGGTATTGGTTGGTACAGAAATAGGAAAAGGAAATATTCCACCAAGTTTAGCATTACCAGCATTGTTTGCA…
HS-FS-000016-I-01_67_116	ATGGGTATAATTACAAAAATAGAACAACAAAAAAGAAATGATGATAGAGTTAATATTTATGTAGATGATAAATTTTTTATTGCTATATTTAAAGAACTTGTTTATACATTTAATTTAAAAAAAGGGAATGAAATAAATGAAGAAGAATTAAAACCTATTTTAGATGATGAAATGTATATAAAAGCTAAAAATAAAGCATTAAATATTTTATCTCATGCTGACCAATCTGAAAAAAAATTAAAAGAAAAACTATCATCAGAATTTGATGAAAATATAATTGAGAGGGTCATAGATTTTCTTAAAAGTTATAATCTCGTAAATGACAGTGTATTAGCTCAAAAAATTGTTAACACAAATGTTAACCTAAATAAATGTGGCAAAAACAGAATTAAGCAGAAT…
HS-FS-000016-I-01_64_50	ATGAAAATAGCAGATAAAACTTGTGTTGATTTTGTAGAAGTACTATCTTCCAAAGAAGCAGTACCAGGTGGTGGGGGAGCTGCTGCACTAGTAGGTGCAATAGGTATGGCTTTAGGTAGTATGGTATGTAACCTTACAATAGGGAAGAAGAAGTATGCTGAGTATGAAGAAAGCGTAAAAGAGATATTAAGTAAGGCAGGAAAGTTAGAAAAAGATTTATTAAAAATGATAGATGATGATGCAGAATGTTTCTTACCATTATCAAAAGCTTACGGGCTTCCTAAAGAAACAGAAGAAGAAAAAAGAATAAAAGCAGAAACAATGGAAAAGGCATTAAAAGTTGCTTGTGAAGTACCATTAAACATAGTAAGAGTTTGCTATGAAGCTATTAAGTTACAT…
HS-FS-000016-I-01_67_163	ATGAAAATCTGTATTGTTTTAAATGGCGAAATTGAAGATTACGAAGTTACAAGAGATATTATAATTAAGGAATGTTATGACTGCATAATATGTGCAGATGGAGGGGCAAATCACACTTATAAAATGGAAATAATGCCAGATTATATATTAGGAGATTTAGATTCAGTAGAAGAAGAAAAGATAAACTTCTATAAAAATAAAGGTGTTAAATTTGAAAAATTTCCATCTAAAAAAGATGAGACTGATACAGAGCTTTGTCTTTTTTTAGCTAAGACACTTAAAGCAAATCATATTGATTTTTTTGGTGCTTTAGGGGGAAGGATTGACCACACTCTTGCAAATATAAAGCTATTATATTATTTAAAAGAAGATGGTATATATTCTAGGATACTTTCTGAT…
HS-FS-000016-I-01_69_31	ATGGAATTAATCGATAAGATAAAAATGAGTGTAAAAGATTTGGATTTATTTTATGGTGATAAGCAAGCATTAAAGAAAATAAATATGGATATAAAAGAGAATAAGGTTACTGCTTTAATAGGTCCATCTGGATGCGGAAAATCAACTTTTATAAGAACGTTAAATAGAATGAATGACTTAATCGAAGATGTAACAATTAAAGGAAACATTTCTGTTGATGGAGAGGACATATATACCTCAGATGATGTTATAAATCTTCGTACTAAAGTAGGAATGGTATTTCAAAAACCAAATCCATTTCCTATGAGTATATATGATAATGTGGCATATGGTCCTCGTACACATGGACTAAGAGATAAGAAGCAATTAGATAAAATTGTAGAAGAAAGCTTAAAAGGT…
HS-FS-000016-I-01_65_192	ATGTACACAAATTTTAATATCGATTTTAATAACTTTAATAAAAAAGAAAATGCTACTAAATTTATGTTAATGGGAGTATTGCTCATTATCTTAGGATTATTATGCCTTACATTTAAGACATTAGGTATAAAATTAATTTCTTGGACTTTTGGTATTGCACTTTTATTCTTTGCATATTTAAATTTAAAAAATATTAATGAACTAAAAAGATATGCTACTAAAGAAGAAATTAAACCCTCTATTAATATCCAATGGGTTCTAATAATTGCATGTATATTACTTTTTGTATTTCCTCAAAAAATACAAAGCATATTTTCATTATTTTTAGGGTTTTATTTAATCTTTAATCAACTAGTAGCACTTGTAAATAGTAAGAATAATCCTTATTCTAAATTTACA…
HS-FS-000016-I-01_69_47	ATGACTGTTTACGATTTAAAAATAGGAGAAAAAGGATTTATTAATAGTATAGATGGAGATATTAAATTATCTAAAAGATTGCTTGCACTTGGATGTATAAATAGTACTGAAATAGAAGTTAAAAAGGTTGCCCCACTTGGAGACCCAATTATAATTAGATTTAGAGGCTTTGACCTTGCGATTAGAAAATCTGATGCTAAAAATATTTCTTTACAATAA
HS-FS-000016-I-01_69_37	ATGAAAAAGATTAATAATTTTACTTATAGGAAACTAAGAGATAAATATAAATTTATAAAAAGAGAAAAAAATACAGAGGCGTATTTAAAGTATAAATTATATATAATGTTAGCTATCTATACAGGTATAGTATTGGTTTTAATGTTTATGGCTGATTATACGTTTTCAAATTTTTCAAATCCTCTTGTTAAATGGCTTAAGTTGAGAAGAGATGTATTATTTTTTTTGGTTTTTATAATTGGATATATCACTATTTTCAATTTTTATTGGAAAAAACCATGGAATTATTTAAGAGAAATCATCAATGCAACACATACTATTTATCAACAAAATGATGAATTGGTTGAACTATCTAAGCCATTAAAGGAAATAGAGCAACAAATGAACCAAATTAAGATG…
HS-FS-000016-I-01_85_35	ATGAACATATTAATTGCTGATGATGAAATTAGTATGCTTAAGATACTTTGTGCATATTTTAAAAAAGAAAACTTCAATGTGTTTACTGCAAAAAATGGGGAAGAGGCTTTAGATATTTTTTATGAAAATAAGATAGACTTAGCTATATTAGACTGGATGATGCCAATAATTGATGGAATAGAGGTTTGTAAAGAGATAAAGGAAAATAGTAATACAAGGGTACTTATGTTGACTGCCAAAAGTCAAAGTGAAGATGAAATAGAAGCACTCAACATTGGAGCAGATGAATATATAAAAAAACCATTTGATCCTAGAGTTTTAATAATAAGAGCTAAGAAACTAATAAATTATAAAAATACAATTAATATTAAAGATTTAAAAATAGATTTTGGGTCAAGT…
HS-FS-000016-I-01_85_14	ATGAAAATAAATATAAAATCAAAGTTAAGTGAATTTATTAAACAGAACAATCTTTTTGATGACAACAGAATAATATCCTACCTTCCTAATATAACAATAGAAACAGACAAAATAAAAACTATAATGATTAATGAGGTTGTCCCAACTAACACCAATGACGATTTTTATAGTGTAGATAAAGATGCTGATTATTTAAAAACTACTATTCCTTTATTTGACAGTGCAGGAATAGAAGTATCTAACATAAATGATATCCTAGATATGGGTATCTATATAACTAATGCAGTAAAACTTCCTAAATCAGAATATACAATAACTCGTGATACAATTAAATTACATATGCCTATTTTAGAAGAAGAAATTAAATTATTTAAAAACCTAGAGGTAGTAATGTTAATG…
HS-FS-000016-I-01_72_63	ATGAACTGTATAAATACTAAGAATCTAAATGTATCATATGGAAACACAGATATTATAAAAAATTTAAATTTAAATATACCAAAAGGAAAAATAACTACCATCATAGGGGCTAATGGTTGTGGAAAATCGACAATACTTAAAACTATAGGTAGAATTATTAGCCCTAATAGTGGGAAAATATATATAAATGGAGAGGACATCTACAAAAAGAAGTCTAAAGAAATAGCAAAGGATATGGCTGTACTTCCACAAAGCCCTCAAGCTCCTAGTGGTCTTACCGTTTCAGAATTAATTTCTTATGGAAGATTTCCTCATAAAAGTGGATTTGGTAATTCTAGTAAAGAAGACAGAGAGATTGTAAATTGGAGTTTAGAAGTTACTGGAATTGCAGAATTTAAG…
HS-FS-000016-I-01_84_52	ATGTACACAATGGGATTAGATATAGGTTCAACTGCATCAAAGGGAGTAATCTTAAAGAATGGGGAAGATATTGTAGCTTCTGAAACAATATCCTCTGGTACTGGGACTACTGGACCATCAAGAGTTTTAGAAAAATTATATGGCAAGACAGGTCTTGCAAGAGAAGATATTAAAAAAGTTGTAGTTACAGGATATGGAAGAATGAACTATTCAGATGCTGATAAGCAAATAAGTGAATTAAGCTGTCATGCTAGAGGGGTAAATTTCATAATTCCAGAGACAAGAACCATTATTGACATAGGTGGTCAAGATGCAAAGGTATTAAAATTAGATAATAATGGAAGACTATTAAACTTTCTTATGAATGACAAATGTGCTGCAGGTACAGGAAGATTTTTA…
HS-FS-000016-I-01_64_52	ATGAAGATAGCAATAACAGGTAAAGGTGGAGTAGGTAAAACGACTTTTTCTTCAATGCTCTCTAGGATGTTTGCTGAAGACGGATACAGAGTTGTTGCTGTTGATGCCGACCCTGATGCTAATTTAGCTTTAGCACTAGGTTTTCCAAAAGAAGTATATGAATCAATAGTACCTATATCAGAAATGAAAAAATTAGTTTCAGATAGAACAGCTGCTTCTGTAGGTTCATTTGGAAAAATGTTTAAGATGAATCCTAAAGTAGACGATATCCCTGAAAATTTCTGTAAAGAATACAATGGAGTAAGATTACTTACATTGGGAACCGTAGATTCTGGTGGTACTGGATGTGTATGTCCAGAGCATGTTCTTTTGAAGAGACTCTGCTCACATTTAATACTA…
HS-FS-000016-I-01_65_146	ATGAAGCTAATTGATAAACTACCATCATTTGATAGAAATTACATTGTAGAGGAGATACAAGGTGCATACGATACAGAATTAAATATTCTTAAAGAAGATATTGATGATACCTTTAACCAATTATTTGTTGATACAGCGACATGGGGATTAGATATGTGGGAAGACATACTCTGCATTGAAAAAAAAGAACTTGATTTTGACACAAGACGTAGCAATATAAAAGCTAAAATGAGAAGCAGAGGTACTAGTACTATTGAAGTTATAAAAAGTATATGTGAGGCATATACAAAATCAGAAACAGATATAAAAGTTTATAGTGATGAATTTACATTCGTATTGAGTTTTATAGCAAATAACTGTGACTATAAAACTCTTTTAGATTGTAGCGAGATGATTGAA…
HS-FS-000016-I-01_76_50	ATGGAAATTTTGACATGTATTAAACAAGTTCCTGGAACGACTTCAGTAGAAGTTGATGAAACTACAGGAGTACTAAAAAGAGATGGAGTAGATTCAAAAATGAATCCCTATGACCTATATGCTTTAGAAACAGCTCTTAGAATAAAGGAAGATAAGAAAGCGAATCTAAAAGTACTTAGCATGGGTCCTCCTCAGGCAAAGAAGGTAATTGAAGAAAGTTTTATGATGGGAGCTGATGAAGGAGCATTAATAAGTGATAGGAGATTTGGAGGAGCAGATGTATTGGCTACTTCCTATACCATATCACAAGGTATTAAGAAGATGGGAAAGGTAGACCTAATAATTTGTGGAAAACAAACTACTGATGGTGATACAGCACAGGTGGGACCTGAAGTAGCT…
HS-FS-000016-I-01_77_100	ATGTTAAAAATAAAAAATTTATCTCTTGATTTACCTAATTTTAAATTACAAGAAAATAGTTTAAATATTAATAATCATGAATACTTTGTTTTATTAGGAGCTAGTGGGTCAGGTAAAACTCTATTCCTAGAAACATTAGCAGGAAGATATCCATCTGCTAAAGGAAATGTATCATACAAAGAAAATTTAATATCAAACTTACCTCCAGAAAATAGAAATATAGGATTTGTATATCAAAATTTTGAATTATTTCCAAATATGAATGTTGAAGATAATATAAGGTTTCCACTTAAATTAAGAAAAATACCTATAGATGAACAGATTCTTAAGGCTAACCACTTGTCTAAATTAATGCAGATAGAAGATATAAAAAATAGGTATCCTAAAAATTTAAGTGGA…
HS-FS-000016-I-01_67_23	ATGGGAGAAATAATAAATGCATTAGATAGAGCCCTAGACATAATTTTGCTGTTATATCATGAAAAGAGAGAAATGGGAATAACTGAAATAAGTAAGGCTATGGGAGTATATAAAAGTACTGTACATAGAACTTTGGTTACTCTTGAAAACAAAGGTTTTGTTATACAAAATGCAGAGAATGGTAAGTATTGGCTAGGAATAAATTTATATGCAATAGGTATGGTTGTGGGAGAAAAAATGTCATTGACTGAAATAGTAAAACCATATACGAAAAAATTAAATCAAGAATTTAACGAAGTAGTTAATGTATCTATATTAGAAGAAAGAGCTCAAGATTCTCCAAGAAGTATCATAATACATAAAGAGTATGGTTCAAATCAATTACTTTCAGTAAATCCA…
HS-FS-000016-I-01_67_178	ATGTTTGTGAAAAAAGGATTATTGCTAGTTGTATCAGGACCATCAGGTGCAGGAAAAGGTACTATTTGCAAAGAACTACTTAAAGAAAATGATACAATAAAACTTTCTGTATCAGCTACTACAAGAAAACCCAGAACTGGAGAAGTTGATGGAGTAAATTATTTCTTCATAAGTAAGGAAAAGTTTGAAGAGATGATAGAAAAAGGTGAGTTTTTGGAGTATGCTCAAATTTATGATAATTTTTATGGAACTCCAAAAGCGGCAATAATGGAATGTTTAGAAAAAGGACAAGATGTATTACTGGAGATTGAAATGCAAGGAGCAAAACAAATAAAAGAAGTTTGCCCAGAGGGAGTATTTATATTTGTACTACCACCATCACTTGAAGAATTAAAAAAT…
HS-FS-000016-I-01_63_501	ATGTTTGCAGAAGAAAGAATCCAAGCTATATTAAATATCCTAAAAAAAGAAGGTAGAGTTACTGTCAAAGAGCTCAGTTCTAAATTTAATGTTACAGAAGATTGTATAAGAAAAGATTTAAAAAATATAGAAAAGATTTCTTCAATAAGAAGAATTTATGGGGGAGCTGTACTAGCTAGAGAAACACTAGAGAATCAGGATACAAAAGACAGAAAAGAAATTAATATTCCAACAAAGAAAATAATAGCAGAAAAAGCATTTAATTTAATTGAAGATAGAGAAACTATATTTTTAGATATCTCTACAATTAACATCTTGCTTGCAAAGTTGTTAGCTGAAAGTAATAAAAAAGTAACACTTGTTACAAATATGTTGGATATACTAAATGTAGTTACTTCA…
HS-FS-000016-I-01_72_76	ATGCTATTACGAGTAGAGAACATTGAGAAATATTATGGCAATCAGAAAATACTTACAAAGGCCTTGAATGATGTGTCATTTCAAATTAATACAGGAGAGTTTGTCAGTATTATGGGAACTTCTGGCTCTGGTAAAACTACTTTGTTAAATTGTATTGCTACAATTGATACAGTAAGTGCTGGAAAAATTTATCTTGAAAATCAAGATATTACTGAACTATCCGAAGAAAACTTAACTGTTTTTCGTCGTGATAATTTAGGTTTTGTTTTTCAGGATTCTAATTTATTAGATACTCTGACATTAGAAGAAAATATAGCACTTCCACTTACAATAAAAAAAGTTTCTCCTGTTGAAATTACTAATAGTGTGTATAATATTGCCACACAATTGAAAATTGAA…
HS-FS-000016-I-01_65_109	ATGAACCTAATAGACAAATTAGATATAAATCAAAAAAAATTATCTACAAATGAAATATCTCTTTTAAACTATTTTCTAAAAAATTCTGAAAAAATAAATCAAAAAAAGATTAAAGATATAGCAAATGAAACTTTTAATTCGACTGCATACATAGTAAGGTTTTGTCAGAAGCTCGGCTTTTCTGGATATAGTGAATTTAAAAACTTTTTAGTTTTTTCATATTCAAATAGAAATGAAAGAAATAAGGAGTTTACTAAAAGTCAAAGTGATATTTTTACTGATGTTATGGATACACAAAATTTAATAAATGTAGAGAATATAGATATGTGTTTAAATGAAATACATAATTCTAAGCATATATATTTTTTTGGTGTTGGGTCTTCTAGATTAGTATGTACT…
HS-FS-000016-I-01_65_129	ATGGAAAAAAAAGTTTTAGCAACAGTTGGAGAAAAAGAGATAACTAATATTGATATTGAAAATGCATTAAAATCATTAGACCCTTATCAAGCTATGCAATTTAAAACTGAAGAAGGAAAAAAACACTTATTAAATGATTTAGTGAATCAAGAATTATTCTTCTTAGATGCTAAAGAAGAAAAATTAGATGAAGAAGAAATATTTAAATTAGAAATGAAAAAGATAGAAGAAAATGTATTAAAGCAATTTGCTATAAATAAAGTTTTATCTAGTGTTAATGTAACAGAAGATGAAAAAGTAAAATTCTTTGAAGCTAATAAGAGCTCTTTCTCTAAACCAGAAAGTGCAACTGCTAAACATATATTAGTAGATAGTGATGAAAAAGCTAAAGAAATACTT…
HS-FS-000016-I-01_64_227	ATGGCAGTTGGTATAGCGTCCTTATTGTTTAATATTGAGGAGGCTTTAAACATTTGTGAGAGTATAAAGCAAATAACTCATTTAGAGATTGGAATTGACAATATATCTGAATGTAGCGAGTTATGTAAATATAAAGAGAGAATTTCTAAGTTAGGATTATCTATAGGGATACACTTGCCTATGGAATTAAATACTTGCGAAAACATAGAGTATATACGAAATTCATGGATAAATTTTATTGAGAAGATAGAATTTGAACTAAAAGGATTTGATATAAGGTATTTTAACCTTCATTTGGGATATGTTATGACAAATAGAGTTAGAAAGAATAGAGACAAATATTTAGGAAATAGTGTGGATTTTTTAGATAAATTAAATACAAATTCATATGTATGTATA…
FABL01000060.1_1	GTGTATAAGAGACAGGTATTATCAGTTTGTGGTTCAGGGACAGTTACATCATCTATGGTAGCAGGTAAATTAAAAGAAGTACTAGGTAATAAGGGGATTTCTATTACTACAACAGAAGCTAGACCAACAGAAGCACTAAATTTAGCACAATCAGGAAGATTTGACTTTATAACATTTACGAGTCCGCTTCAAACAGGCGATTATGGAATACCAACTATAAATGCATTTGCTTGCCTAACTGGTATAGGGGAAGAGGCATTCTTTGAAGAAGTTTTGACTGTTATTGAAGGCATAGATAAGTAA
FABB01000130.1_9	ATGAAAAAATTTATTATATCAATTATATCTTTAGTATTGTTTTTTTCAAATATATCACTTATATACAAAGTAAATGCTGATGAGACTAAAGTTAAAAATTATAAGTTTGAAAGAGATATAACTATTGATGGTGTTATAGGAAGTAATAGTACTTTTTTTGAAGTAAATAAAAATTGGGATATTGAAGAAGTTTTATTGCATCTTAATTTTAGTAAGAGCCAAATATTAAATGGAGATGTTTCAAGTTTAACTGTATTGATAAATAATGTACCAATAAAATCTATTAAATTAAATGCTAAGACAAATTATAAAAATACATTAGAAGTATTAGTTCCAAAAGATTATATAATTCAAGGATATAATGAAATAAAAATAAAAACATACAAAACAATATCTGAT…
SRR4300546_ST1_127_64	GTGAGTTCTCCTAAATGGACAAAAGAGCAATTAGAAGTTATAGGAAGTAGAGAATGCAATTTATTGGTTGCTGCTTCTGCTGGTTCAGGAAAAACAGCCGTTCTAGTTGAGCGTATAATTCAAATGATAACAAGTAGAGAAAATCCAATTGATATAGATAAGTTATTAGTTGTTACATTTACTAATGCTGCTGCGTCAGAAATGAGAGAGAGGATAGGGGATGCTATAGGAAAAGCCTTAGATGAAAACCCAGAAAATAAACATTTACAAAACCAACTTGTTTTATTAAATAAATCTAGTATTACAACAATACACTCATTCTGTTTGGATGTTATAAAATCAAACTTTCATAGAATAAACTTAGACCCTAATTTCAGAATAGGAGACCAAACTGAATGT…
CZWQ01000005.1_193	TTGGATTACTTAAAGTATTTTGAAAAAGCTGTAATGTATATTGAGAATAATTTACATGAAAATATAACTGTAAATGATGTGGCAAAAGAAACTGGATATTCTTATTATCATTTAACACGCTTATTTAAGTCTATGTTTGGTGAGAGTGTAGGAAGTTATATAAAAAAAAGACGATTAGTAAGTAGTACAAAAGAACTTTTATATAGTGATAAAAAAGTGATAGATATAGCTATTGGTAGTGGATTTGAATCTTCGGAAGCATTTAGCAGAGCATTTAAATCTATATACAAGGTTAGCCCTATAGAATATAGAAAAAATAGAATTGATGTATTTGTTGGTAAAAAGAAAAAATTAGAGTTAGATTTTATGAGACATCTTGTTGGAAATATAACGATTAAA…
ERR502962_ST1_580_28	GTGAGTAAGATATTAGAAATGCAACAAATATATAAAAGTTTTGGAAAGGTAGATGTTTTAAAAGGGATAAATTTTGAGTTAGAAAAGGGAGAAGTAAGAGCTCTTTTGGGAGCTAATGGAGCAGGAAAATCTACACTTATTAAAATTTTAGGAGGAGTTCATTCTCAAACTAAAGGTAAAGTAATTTTGACTGGTAATGAAATAATGTTTAAAAATTCACATCATTCTAAAGAAAATGGTATTAGTATAATTTATCAAGAATTAAGCTTGATACCAACGCTTACAGTACTTGAAAATATTTTTCTTGGTAGAGAAATTTTAAAAGGAAGTGTGTTTTTAAACAAGAAAGACATGCTTGAGGAATATATGAAAATTTGTGAGGATTTTGATTTTAATATA…
FABD01000044.1_14	ATGAAATATGAAGAAGCATTAGAGTACATATCACAAACTAATAAATTCGGTATAAGATTAGGATTAGAAAATATCGGAAAGTTATTAGAATTATTAGGAAATCCACAAGAAACTTTGAATATAATACATGTAGCTGGAACTAATGGAAAAGGTTCTGTGTGTTCTTTTGTTTCTAATATACTAAGAGAGTGTGGATATAAAGTTGGTTTATATACATCTCCATATTTAGAAACTTTTACTGAGCGTATAAGAGTAAATGGTCAAAATATACCACAGGATGATGTTGCTAGAATAATTGAGTTAATAAAAGAAAAAATAGAGATTATGGTAAAAGAAGGCTATGCATATCCAACAGAATTTGAAGTGGTTACTGCAATGGCATTTTATTACTATTCAGAA…
FABU01000026.1_6	ATGTTAGATAGATTTTTTGGAGAAGAAGGATGCTTTGGTGGAGGAGGATGGTGGATAATAGTACTATTCTTCCTATTCTTAGCTTTTGGAGATAGCTGGGCAGAATTTGACATAATGGCATGGATACCATTCCTAATAGTTTTATTAATACTTTGCTGCTGTGGTGGATGCTTAGAATAA
HS-FS-000016-I-01_70_141	ATGGATAACAATTTGATTACCATTGAAAAAACTTTAGATTATATAGAAAAACATCTTTTAGATGAGATGTTAGATTTAAATGTAATTTCTAAAGAGATAGGCTATTCAAAGTACCATTTACATAGAATGTTTACATCAGTTGTCGGATTTAGTATACATAATTATATACAAAGACGTAGACTAACTGAAGCAGCAAGAATGCTCATTTTTACAGAAAAACCAATTATTGAAATTGCTTTAATCTCGGGGTATGACACACAACGTTCTTTTTCAACAGGGTTTAAAAAAATGTTTAAGCATAGCCCTAAGTTTTTTAGAAAACATCAAGATTTTTTACCACTACAATTAAAATTTGATATTAATAATAGAAAAAGGTTACATGGAGGTATGGTTTTAGAT…
HS-FS-000016-I-01_69_63	ATGGACTATATAGGAATAGAAAATATAACACCTTATGAAAATACATATGAATTTAGTGTATATGAATATGATGATGAAATCACCTTAGGTAGTGAAAAGTTATATGTGTGTGAATTAAGGGTTGTATTGATTAAAGTTAATTCTCTGTATGTTGAAAGATTGCATAAATCAGTTGAAGCAATGGTCTTAGTAAAAAACTTGAAAAAGGATTTAGATAAAACACTTGTTGTAAACAAAATAAAGAATTTTGTGCTAGATGAGATTTGGGTAGAAAATCTAGTAAAAGAGAATATAGAAGTTATATTTGTAGAAAGCTAG
HS-FS-000016-I-01_69_30	ATGGTCAATAATAGTTTAGATATAAGTATTGATACTTTAAAAGAACAAACAGTACTTATGATGGAAAAATGTGAAGAAGCAATAGAAAAGTCTGTGACTTGTATGATAGAGAAGGATTTAGAGGGTGCAAGAAAAGTAGTAGAAGATGATGAAGAAATAAATAAATTAAGAGAAGAAATAAGAGATAAGAGTATAGAGCTAATAGTATTAAAGCAACCAATGGCAAGGGACTTAAGATTTATTTATTCATTAGGTAATATATCGATAGAGTTGGAAAGAATAGGAGATTATGCAGCAAATATAGCTAGAGAAATGTTGAAGATAGGTGGAGAGGCTTATATAAAAGAGCTGATAGATATTCCTAAGATGGCAAAAGAATGTAAGTCTATGATGTCTCAG…
HS-FS-000016-I-01_69_86	ATGTCATTTGAAAAAATAAATAATAATAACCTAGATAAAATACACAATAGGAAGTGTATTATGCTTGTAAACTTTAATAAAAAAGAATTATCATTAATTAAAAACGTAAGTAACTTTGCTGGAATAAGAGACCATATAATCTTAAGTGAAAAAAACGGAGAGAATATAATAAGAGACATTTTAGATGGAAATATATCAAGTGAATGTGAAAATGGGATTAAGAGTAAGTCTGTAATATTTAATAACACTCCAAGCACACAAGTAAATGCATTTTTAGAAGGTCTAAAAAAAGTGAGAATAAATAGACCTTTTACAGCTATGGTAACAGAGACATCTATTGATTGGACATTGAATAATTTAATAGAAAATTTAGTTCAAGAACGTAATGCTATGTCTTTA…
ERR024642_ST1_115_195	ATGAATTTCGTTGAACTTACAAAAAAAAGATATTCTTGCCGTAATTATCAAGATAGAAAGGTTGAAAAAGAAAAACTTGAGAAGGTTTTAGATGTTGCAAGAATAGCTCCAACTGGTGGTAATCGTCAACCTCAAAGATTGATTGTTATTCAGGAAAAAGAAGGTATAAATAAACTTTCTAAGGCTGCCAATATATATGATGCTCCATTAGCAATTCTTGTATGTGGAGATAAAGACAAAGTTTGGACAAGACCTTTTGATGGGAGACAACTTACAGATATTGACACAAGTATAGTTACAGACCATATGATGTTACAGGCAACTGAACTTGGATTGGCAAGTGTTTGGGTGTGCTATTTTAATCCAGATATAATTAGAGAAGAGTTTAGTTTGCCAGAT…
HS-FS-000016-I-01_70_154	ATGTTAAAAGTTATAGCAACTGGTTATGATGGAAAAATGGGTAAGATTTTAGCCGATACTATAAGAGAAGATAATGAATTAGAATTGGTTTGTGTTGCAGCTAGAGGTCTGGATAGCTATGAAGGCGACCTTAAAATTTATGAAGATATGAGTACTATAGTTGAGGAAGCTGATGTAGTTATAGATTTTTCTCATCACTCTAATTTAGATAATATCTTATCTTACGTTTTAAAGACTAAAACACCTTTAGTAATTGCTACTACTGGATATAATGATAACGAAATGAACAAAATACGTGAAGCGGCTAAAGTTATTCCTGTATTCCAATCATATAATATGTCTCTTGGTGTAAATGTATTAGTAAAATTGGTTAAAGATGCAGCTAAATTACTAGAAGGA…
HS-FS-000016-I-01_70_119	ATGACAAATGCTAAAAGTAAAAAAGAATATCTAAATCGTATTTGCAAAGTGCAAGACTATATAGAAGAACATTTACATGAACCTCTTTCTCTTGATGAACTTTCTAATATAGCAGGTTTTTCAAAATTTCATTTTCATAGAATCTTCAAAGCAATAGAAAAAGAAACTTTGGCACAATATGTAAATAGGCTAAAACTAGAAAATGCAACTGCTTTTCTTATTCATCGAACTGACATGACTGTTACTGATATTGCACACTACTTCGGCTTTACTGATTCAGCAGTTTTCTCGAGAGCATTTAAAAATTACTATAAAATAAGCCCTATAAAATATAGAAACAATTATAGCAAGAATTGCAAAGAACCATATAAAATTTCTCAGTACAATAGAAGCATATCA…
HS-FS-000016-I-01_70_142	ATGACACCTATTATACAATTTAAAAATATTAAAAAACAATATAATGATAAAACTATAATAGATAATCTTAATTTAGATATAGAAAAAGGAGAGTTTTTGACTGTAATTGGTTCGTCTGGTTCTGGTAAGACAACACTCTTAAAAATGATTAATGGTCTGATTTTGCCAGATGGAGGAAATATTTTGATAAACCAAACAGATATCAAAAACGAGGACTTAATTAAATTAAGAAGAAGAATAGGATATTGTGTACAAGGAAGTGTTCTTTTTCCTCATATGACTGTTGAAGAAAATATTTCATATGTACCAAATCTCCTAAGTAAAAAGAATAAATTAGAAGTAAAAAGTGCTGTAAACAAGTGGATGGAAATAGTGGGATTGCCAAATGATATGAAAGTG…
HS-FS-000016-I-01_65_62	ATGGATGATGTTTCAAGACAAAATGCTATAAAAGCTTTAAAACAAACAAAAATGGAAATAGCAGGAGAGTATGGAATGAATTATGAAGATGCTTTTGAAATAATAGAAAATGCGTCTAATAAAGGTGTTTTAGAAGGTTACTTTAAAAAGCTTGAAAAGAAAAAAAATTTAGGTCAAGGTATATCTAGGCATTTAGAATAA
HS-FS-000016-I-01_68_128	ATGCTAGTAATTTCAAGAAAAAAAGATGAAGCAGTACTTATAGGAGAAAGCATAGAAGTAAAAATTGTAGGGGTAGATGGAAACAATGTGAAACTAGCTATATCGGCGCCTAACAATATAAGTATATTAAGAAAAGAAATATACGAAAAAGTAAAGAGTGAGAATATAAAAGCTACAAATAAAAATATAAAAATTTTAAAGTCATTAAAATAA
HS-FS-000016-I-01_73_94	ATGACTGATATGTCTATGATTTTGCATTTTTTATTTTCAGGTGTTGCAACTGCTGGATTTGCTGTTTTCTTTAATGCTCCACTATATCTACTTCTTCCAGCTGGAGTAACTGGCGGAATTGGTTGGATTGTATATGTTTATTTATTTAATTTTACTACAAATGCAGTTTTTGCAGGTTTTATTGCTGCTGCTTTGGTCTCAGCGTGTAGTGAGACTTTAGCAAGAAAACTAAAGCAACCAGCTATTGTGTTCGTAATTCCAGGTATTCTTCCTCTAATACCAGGAATTGGGCTATATAATACAATGTTGTCTTTGATTCAGAAAAATTATTCTTTGGCTATGTCAAAAGGTACAGATGCGCTATTTCTAAGTGCTGCAATAGCACTTGGTGTATTAGTT…
HS-FS-000016-I-01_80_14	ATGGCCAAAAAAGATGTTATAGAATTAGAAGGTACAGTTTCAGAAGCTTTACCTAATGCTATGTTCAAAGTTAAACTAGAAAATGGACATGAGATATTATGCCACATTTCTGGAAAGCTAAGAATGAACTTCATAAGAATTCTTGAAGGTGACAAGGTGAATGTTGAACTTTCTCCATATGACCTTACAAGAGGAAGAATTACTTGGCGTAAGAAGTAG
HS-FS-000016-I-01_65_131	ATGAATAATTTGGATAAGCTTTTTGAATTAGCTTCTCAAGAAGAGATAATAATTCATTATACCACTTATATTGCAGGTGATTTAGAAGGGCTATATATAAACAAACATGGTATTAAAATTATATCATTACTCAGTAATTTAAAACAAAACTCAAAAAAATTGACATCCATCTTAGCTGAAGAACTTGGACATCATTTCACTAGCCTTGGATACTATGTATCCTCTTATAACGATTATTATACAAAAATTATTATAGATAAGTGCGAAAATAAAGCCTTAAAATGGGCTTGTGAGTTCTTAATTACTGAAGAAGATATAATAAACATAATTAATTCTGGCATCACTTGCGTTTATGAAATGGCAGACATACTTAATGTGGATATTACTTTCTTTCAAAAA…
HS-FS-000016-I-01_76_6	ATGATAAGAAGTATGGATTTATTAAGTGAATACATAAAAAATCCTACTTTGTTTAGATATATTTTAGGAGTTCAAGAAGTTATGACTATGGTATTTATACTTATACAAGGCTAG
HS-FS-000016-I-01_71_134	ATGGAAAAACCAAATACAAAAGTTGTTAACTTTCAAGAGTATAAAGACAGAAAAAACCAAAGAGAAGTAAATAGAGACGAACTTTTAAAGCTTATAAAAAAAATTGTGACTTCAAAATAG
HS-FS-000016-I-01_63_612	ATGTTATATAATCAAGATACTGTTGAATATGATGTTGTTTCAAAATTTATTTTGGGACAACTTTTTTATTTGAAAATATATGAAAAGGTTTATTTTAAGCTTTACAATAAAAAATATAAGTAG
HS-FS-000016-I-01_63_598	ATGAAACGGGGTGTAGATATGAACTTAAAAATAAACGCAGAGAGATGTAAAAGTTGTGAATACTGCGTTATATCTTGTAAAAAAGGAGCATTAAAAATATCAAGTAAGATAAATAAAGAAGGTTATGCTCATGTAGAAGTTGATGAGAGTAAATGCATACTTTGTGGAATTTGCTATCAGGTGTGTCCAGATAATGTTTTTGAAATAATTAAAGAAAAAGCATGTCAAGAGGCTTAG
[truncated: 997 more rows]
