# Supplementary material for: A global to local genomics analysis of Clostridioides difficile ST1/RT027 identifies cryptic transmission events in a northern Arizona healthcare network
Source: Microb Genom. 2019 May 20;5(7):e000271. doi: 10.1099/mgen.0.000271 (PMC6700662; doi:10.1099/mgen.0.000271)
Supplement: Supplementary File 13 [file mgen-5-271-s0013.xlsx]

## Sheet: Table_S13
Table S13. CDS identifed as 'gained' or 'lost' within ST1
marker_ID	Average_BSRvalue_in_ST1	#_ST1_genomes_BSR>=0.8	#_ST1_genomes_BSR>=0.4	Total_#_ST1_genomes	Average_BSRvalue_in_nonST1	#_nonST1_genomes_BSR>=0.8	#_nonST1_genomes_BSR>=0.4	Total_#_nonST1_genomes	CDS_status_in_ST1	Protein	Product	Best Match from Stabler et al. 2009	Present_in_ST11*
HS-FS-000016-I-01_80_62	1	1379	1379	1379	0.0341365	17	17	498	conserved_in_ST1	gi|497573657|ref|WP_009887841.1|	MULTISPECIES: thymidylate synthase [Clostridiales]	CD196_0055
MOPO01000014.1_61	1	1379	1379	1379	0.0342771	17	17	498	conserved_in_ST1	gi|497573665|ref|WP_009887849.1|	MULTISPECIES: dihydrofolate reductase [Clostridiales]	CD196_0056
HS-FS-000016-I-01_80_60	0.999862	1379	1379	1379	0.0345382	17	17	498	conserved_in_ST1	gi|497573667|ref|WP_009887851.1|	MULTISPECIES: SIR2 family protein [Clostridiales]	CD196_0057
AVJE01000008.1_42	0.999695	1377	1379	1379	0.0351606	17	18	498	conserved_in_ST1	gi|545004310|ref|WP_021396387.1|	thiC family protein [Clostridioides difficile]	CD196_0058
HS-FS-000016-I-01_68_204	1	1379	1379	1379	0.0100402	5	5	498	conserved_in_ST1	gi|497573983|ref|WP_009888167.1|	MULTISPECIES: nitroreductase family protein [Clostridiales]	CD196_0322
SRR4300546_ST1_109_156	0.999746	1379	1379	1379	0.0213655	5	5	498	conserved_in_ST1	gi|497573984|ref|WP_009888168.1|	MULTISPECIES: TetR/AcrR family transcriptional regulator [Clostridiales]	CD196_0323
MTVQ01000001.1_459	0.999855	1379	1379	1379	0.0341165	17	17	498	conserved_in_ST1	gi|545026233|ref|WP_021407727.1|	MULTISPECIES: DNA-binding response regulator [Clostridiales]	CD196_0452	yes
AVJE01000024.1_2	0.998071	1373	1379	1379	0.0345382	17	17	498	conserved_in_ST1	gi|497574138|ref|WP_009888322.1|	MULTISPECIES: sensor histidine kinase [Clostridiales]	CD196_0453	yes
HS-FS-000016-I-01_65_210	1	1379	1379	1379	0.0301004	15	15	498	conserved_in_ST1	gi|549321617|emb|CCL25616.1|	conserved hypothetical protein [Clostridioides difficile T11]	CD196_1300
AVKP01000029.1_382	1	1379	1379	1379	0.0301004	15	15	498	conserved_in_ST1	gi|531516416|gb|EQI01331.1|	bacterial regulatory helix-turn-helix s, AraC family protein [Clostridioides difficile F314]	CD196_1301
ERR026353_ST1_1145_2	1	1379	1379	1379	0.0276506	9	9	498	conserved_in_ST1	gi|497575114|ref|WP_009889298.1|	MULTISPECIES: CPBP family intramembrane metalloprotease [Clostridiales]	CD196_1347
HS-FS-000016-I-01_66_81	0.990573	1366	1366	1379	0.015743	8	8	498	conserved_in_ST1	gi|497574616|ref|WP_009888800.1|	MULTISPECIES: hypothetical protein [Clostridiales]	CD196_1439
HS-FS-000016-I-01_66_82	0.989985	1365	1366	1379	0.0160241	8	8	498	conserved_in_ST1	gi|497574617|ref|WP_009888801.1|	MULTISPECIES: protein kinase [Clostridiales]	CD196_1440
ERR025002_ST1_174_30	0.990573	1366	1366	1379	0.0159438	8	8	498	conserved_in_ST1	gi|1122420480|ref|WP_074073313.1|	hypothetical protein [Clostridioides difficile]	CD196_1468
HS-FS-000016-I-01_70_49	0.996773	1375	1379	1379	0.153815	21	21	498	conserved_in_ST1	gi|545005373|ref|WP_021397345.1|	MULTISPECIES: integrase core domain protein [Clostridiales]	CD196_2150
AVJE01000109.1_8	0.999616	1378	1379	1379	0.0143173	7	7	498	conserved_in_ST1	gi|497579556|ref|WP_009893740.1|	MULTISPECIES: ABC transporter permease [Clostridiales]	CD196_2710
HS-FS-000016-I-01_72_76	1	1379	1379	1379	0.0272892	7	7	498	conserved_in_ST1	gi|549319891|emb|CCL27201.1|	ABC transporter (ATP-binding protein); efflux of cationic peptides [Clostridioides difficile T11]	CD196_2711
HS-FS-000016-I-01_72_75	1	1379	1379	1379	0.0150803	7	8	498	conserved_in_ST1	gi|497579557|ref|WP_009893741.1|	MULTISPECIES: hypothetical protein [Clostridiales]	CD196_2712
HS-FS-000016-I-01_72_74	0.999775	1378	1379	1379	0.0140562	7	7	498	conserved_in_ST1	gi|497576990|ref|WP_009891174.1|	MULTISPECIES: sensor histidine kinase [Clostridiales]	CD196_2713
FAJB01000003.1_102	0.99	1379	1379	1379	0.0139759	7	7	498	conserved_in_ST1	gi|1160925592|ref|WP_079767072.1|	DNA-binding response regulator [Clostridioides difficile]	CD196_2714
HS-FS-000016-I-01_70_13	0.995859	1370	1373	1379	0.0429317	20	21	498	conserved_in_ST1	gi|497577284|ref|WP_009891468.1|	MULTISPECIES: XRE family transcriptional regulator [Clostridiales]	CD196_2913
ERR030286_ST1_172_30	0.998202	1377	1377	1379	0.0278514	14	14	498	conserved_in_ST1	gi|497577287|ref|WP_009891471.1|	MULTISPECIES: hypothetical protein [Clostridiales]	CD196_2914
ERR348053_ST1_117_44	0.995308	1364	1379	1379	0.00813253	4	4	498	conserved_in_ST1	gi|497577329|ref|WP_009891513.1|	MULTISPECIES: hypothetical protein [Clostridiales]	CD196_2939
HS-FS-000016-I-01_70_45	1	1379	1379	1379	0.00803213	4	4	498	conserved_in_ST1	gi|497577330|ref|WP_009891514.1|	MULTISPECIES: hypothetical protein [Clostridiales]	CD196_2940
HS-FS-000016-I-01_70_46	0.997498	1370	1379	1379	0.00803213	4	4	498	conserved_in_ST1	gi|497577331|ref|WP_009891515.1|	MULTISPECIES: hypothetical protein [Clostridiales]	CD196_2941
HS-FS-000016-I-01_70_47	0.998847	1374	1379	1379	0.00803213	4	4	498	conserved_in_ST1	gi|497577332|ref|WP_009891516.1|	MULTISPECIES: hypothetical protein [Clostridiales]	CD196_2942
HS-FS-000016-I-01_70_50	0.998927	1375	1379	1379	0.00833333	4	4	498	conserved_in_ST1	gi|497577335|ref|WP_009891519.1|	MULTISPECIES: DUF262 domain-containing protein [Clostridiales]	CD196_2943
HS-FS-000016-I-01_70_51	0.999456	1376	1379	1379	0.00851406	4	4	498	conserved_in_ST1	gi|531700033|gb|EQJ77196.1|	FRG domain protein [Clostridioides difficile P45]	CD196_2944
HS-FS-000016-I-01_70_54	1	1379	1379	1379	0.142169	4	18	498	conserved_in_ST1	gi|497577339|ref|WP_009891523.1|	MULTISPECIES: hypothetical protein [Clostridiales]	CD196_2946
HS-FS-000016-I-01_70_74	0.998695	1376	1378	1379	0.00401606	2	2	498	conserved_in_ST1	gi|497579662|ref|WP_009893846.1|	MULTISPECIES: hypothetical protein [Clostridiales]	CD196_2963
MPFT01000133.1_2	0.997687	1367	1379	1379	0.246205	16	17	498	conserved_in_ST1	gi|497578315|ref|WP_009892499.1|	MULTISPECIES: hypothetical protein [Clostridiales]	CD196_3232
HS-FS-000016-I-01_71_115	0.999717	1378	1379	1379	0.0348996	17	18	498	conserved_in_ST1	gi|497574061|ref|WP_009888245.1|	MULTISPECIES: hypothetical protein [Clostridiales]	CD196_3234
AVJE01000023.1_7	1	1379	1379	1379	0.0348594	17	17	498	conserved_in_ST1	gi|497574063|ref|WP_009888247.1|	MULTISPECIES: recombinase family protein [Clostridiales]	CD196_3235
HS-FS-000016-I-01_71_107	0.999768	1378	1379	1379	0.0341365	17	17	498	conserved_in_ST1	gi|497574067|ref|WP_009888251.1|	MULTISPECIES: hypothetical protein [Clostridiales]	CD196_3239
AVKP01000007.1_187	0.989869	1379	1379	1379	0.0340361	17	17	498	conserved_in_ST1	gi|545026080|ref|WP_021407579.1|	MULTISPECIES: hypothetical protein [Clostridiales]	CD196_3240
HS-FS-000016-I-01_71_104	0.999181	1376	1379	1379	0.100602	17	17	498	conserved_in_ST1	gi|497574070|ref|WP_009888254.1|	DUF4367 domain-containing protein [Clostridioides difficile]	CD196_3241
HS-FS-000016-I-01_71_103	0.999826	1379	1379	1379	0.0953815	18	18	498	conserved_in_ST1	gi|497574071|ref|WP_009888255.1|	MULTISPECIES: sigma-70 family RNA polymerase sigma factor [Clostridiales]	CD196_3242	yes
AVMQ01000008.1_19	0.989688	1378	1379	1379	0.0337952	17	17	498	conserved_in_ST1	gi|545052174|ref|WP_021425936.1|	hypothetical protein [Clostridioides difficile]	CD196_3243
HS-FS-000016-I-01_70_55	0.999275	1378	1378	1379	0.0208635	3	18	498	conserved_in_ST1	gi|549332179|emb|CCL39261.1|	hypothetical protein BN176_2640009 [Clostridioides difficile E19]
HS-FS-000016-I-01_71_105	0.999797	1379	1379	1379	0.0332731	16	17	498	conserved_in_ST1	gi|497574069|ref|WP_009888253.1|	MULTISPECIES: hypothetical protein [Clostridiales]
ERR026357_ST1_932_5	0.998441	1375	1378	1379	0.00401606	2	2	498	conserved_in_ST1	gi|497585848|ref|WP_009900032.1|	MULTISPECIES: transposase [Clostridiales]
MOPL01000052.1_14	0.99	1379	1379	1379	0.0193775	9	9	498	conserved_in_ST1	gi|497575111|ref|WP_009889295.1|	MULTISPECIES: hypothetical protein [Clostridiales]
MPFT01000018.1_15	0.99831	1376	1377	1379	0.0280522	14	14	498	conserved_in_ST1	gi|497577289|ref|WP_009891473.1|	MULTISPECIES: DUF2500 domain-containing protein [Clostridiales]
MPFT01000100.1_2	0.99	1379	1379	1379	0.0337751	17	17	498	conserved_in_ST1	gi|1243123892|ref|WP_095926211.1|	hypothetical protein [Clostridioides difficile]		yes
AHJJ01000234.1_6	0.328194	4	8	1379	0.975984	482	485	498	lost_in_ST1	gi|490589488|ref|WP_004454508.1|	MULTISPECIES: HXXEE domain-containing protein [Clostridiales]
AVHE01000002.1_35	0.391617	4	6	1379	0.966888	479	480	498	lost_in_ST1	gi|489516367|ref|WP_003421197.1|	MULTISPECIES: FAD-dependent thymidylate synthase [Clostridiales]		yes
AVMA01000045.1_137	0.0449746	7	8	1379	0.869518	475	476	498	lost_in_ST1	gi|544957824|ref|WP_021362795.1|	MULTISPECIES: phage integrase [Clostridiales]
CZYC01000086.1_7	0.00553299	9	9	1379	0.830863	486	487	498	lost_in_ST1	gi|566234404|gb|ETI96601.1|	Transposase [Intestinibacter bartlettii DORA_8_9]
ERR026353_ST1_1101_2	0.00581581	7	8	1379	0.947972	478	482	498	lost_in_ST1	gi|695310901|ref|WP_032511307.1|	CPBP family intramembrane metalloprotease [Clostridioides difficile]
ERR026353_ST1_1124_3	0.00682379	9	10	1379	0.97004	487	487	498	lost_in_ST1	gi|489534157|ref|WP_003438887.1|	MULTISPECIES: hypothetical protein [Clostridiales]
ERR026353_ST1_854_1	0.00705584	8	10	1379	0.973554	486	489	498	lost_in_ST1	gi|497582976|ref|WP_009897160.1|	MULTISPECIES: alpha/beta hydrolase [Clostridiales]		yes
ERR026353_ST1_960_10	0.00640319	9	9	1379	0.964076	486	486	498	lost_in_ST1	gi|760240270|gb|AJP12909.1|	hypothetical protein CDIF630_03431 [Clostridioides difficile 630]
ERR125924_ST1_456_5	0.00677302	9	10	1379	0.941084	478	478	498	lost_in_ST1	gi|497581419|ref|WP_009895603.1|	MULTISPECIES: hypothetical protein [Clostridiales]
ERR125924_ST1_482_2	0.0274184	7	9	1379	0.968173	481	489	498	lost_in_ST1	gi|500187875|ref|WP_011861232.1|	EAL domain-containing protein [Clostridioides difficile]		yes
ERR339956_ST1_371_1	0.00745468	9	10	1379	0.976606	489	489	498	lost_in_ST1	gi|544958736|ref|WP_021363611.1|	MULTISPECIES: TetR/AcrR family transcriptional regulator [Clostridiales]		yes
MNBQ01000011.1_65	0.00625091	7	8	1379	0.953855	482	482	498	lost_in_ST1	gi|1092493225|ref|WP_070480577.1|	MULTISPECIES: MerR family transcriptional regulator [Clostridiales]
NBTR01000003.1_3829	0.00671501	9	10	1379	0.925643	478	478	498	lost_in_ST1	gi|357546223|gb|EHJ28160.1|	hypothetical protein HMPREF1123_02195 [Clostridioides difficile 050-P50-2011]
SRR4300580_ST1_575_1	0.00612763	8	10	1379	0.83261	477	487	498	lost_in_ST1	gi|1122413037|ref|WP_074068472.1|	SrtB family sortase [Clostridioides difficile]
**Analyzed ST11 genomes: GCA_000210435.1, GCA_900008615.1, GCA_001972065.1, GCA_900008745.1, GCA_001972115.1, GCA_900009705.1, GCA_002301695.1, GCA_900011345.1, GCA_002303305.1, GCA_900012445.1, GCA_002352505.1, GCA_900012985.1, GCA_002412385.1, GCA_900014685.1, GCA_900008545.1
**present if average BSR value for ST11 genomes >0.8
