# Supplementary material for: A global to local genomics analysis of Clostridioides difficile ST1/RT027 identifies cryptic transmission events in a northern Arizona healthcare network
Source: Microb Genom. 2019 May 20;5(7):e000271. doi: 10.1099/mgen.0.000271 (PMC6700662; doi:10.1099/mgen.0.000271)
Supplement: Supplementary File 14 [file mgen-5-271-s0014.xlsx]

## Sheet: Sheet1
Table S14. CDS identified as lost in northern Arizona isolates HS-FS-000084 and HS-FS-000103
Sequence_identifier	BSR value against CD196 - FN538970_1_3269965-3425266 (deleted region in HS-FS-000084 and HS-FS-000103)	top blastx hit	top blastx hit title
AMDL01000006.1_991	0.97	gi|1122648599|ref|WP_074124794.1|	MFS transporter, partial [Clostridioides difficile]
CD-HSFS000016-HSFS000016I01-CL-USA-2016-017-PK_72_3	1	gi|490588845|ref|WP_004453865.1|	MULTISPECIES: ABC transporter ATP-binding protein [Clostridiales]
CD-HSFS000016-HSFS000016I01-CL-USA-2016-017-PK_72_4	0.65	gi|260210680|emb|CBA65440.1|	hypothetical protein CD196_2784 [Clostridioides difficile CD196]
CD-HSFS000016-HSFS000016I01-CL-USA-2016-017-PK_78_11	1	gi|531102865|gb|EQE08441.1|	hypothetical protein QAU_3111 [Clostridioides difficile CD13]
CD-HSFS000016-HSFS000016I01-CL-USA-2016-017-PK_78_14	1	gi|489527236|ref|WP_003431984.1|	MULTISPECIES: transcriptional regulator [Clostridiales]
CD-HSFS000016-HSFS000016I01-CL-USA-2016-017-PK_78_17	1	gi|489517763|ref|WP_003422575.1|	MULTISPECIES: PTS fructose transporter subunit IIB [Clostridiales]
CD-HSFS000016-HSFS000016I01-CL-USA-2016-017-PK_78_18	1	gi|497577145|ref|WP_009891329.1|	MULTISPECIES: PTS sugar transporter subunit IIA [Clostridiales]
CD-HSFS000016-HSFS000016I01-CL-USA-2016-017-PK_78_20	1	gi|497577147|ref|WP_009891331.1|	MULTISPECIES: glucose uptake protein [Clostridiales]
CD-HSFS000016-HSFS000016I01-CL-USA-2016-017-PK_78_23	1	gi|489535141|ref|WP_003439868.1|	MULTISPECIES: DUF1848 domain-containing protein [Clostridiales]
CD-HSFS000016-HSFS000016I01-CL-USA-2016-017-PK_78_24	1	gi|497577149|ref|WP_009891333.1|	MULTISPECIES: hypothetical protein [Clostridiales]
CD-HSFS000016-HSFS000016I01-CL-USA-2016-017-PK_78_25	1	gi|497579578|ref|WP_009893762.1|	MULTISPECIES: hypothetical protein [Clostridiales]
CD-HSFS000016-HSFS000016I01-CL-USA-2016-017-PK_78_26	1	gi|497579580|ref|WP_009893764.1|	MULTISPECIES: hypothetical protein [Clostridiales]
CD-HSFS000016-HSFS000016I01-CL-USA-2016-017-PK_78_30	1	gi|489527278|ref|WP_003432026.1|	MULTISPECIES: SIS domain-containing protein [Clostridiales]
CD-HSFS000016-HSFS000016I01-CL-USA-2016-017-PK_78_31	1	gi|497577153|ref|WP_009891337.1|	MULTISPECIES: pyridoxal phosphate-dependent aminotransferase [Clostridiales]
CD-HSFS000016-HSFS000016I01-CL-USA-2016-017-PK_78_32	1	gi|497579583|ref|WP_009893767.1|	MULTISPECIES: PTS glucose transporter subunit IIBC [Clostridiales]
CD-HSFS000016-HSFS000016I01-CL-USA-2016-017-PK_78_33	1	gi|497577154|ref|WP_009891338.1|	MULTISPECIES: PRD domain-containing protein [Clostridiales]
CD-HSFS000016-HSFS000016I01-CL-USA-2016-017-PK_78_35	1	gi|1243065064|ref|WP_095891429.1|	thioredoxin, partial [Clostridioides difficile]
CD-HSFS000016-HSFS000016I01-CL-USA-2016-017-PK_78_36	1	gi|497579586|ref|WP_009893770.1|	MULTISPECIES: TrmB family transcriptional regulator [Clostridiales]
CD-HSFS000016-HSFS000016I01-CL-USA-2016-017-PK_78_37	1	gi|497577158|ref|WP_009891342.1|	MULTISPECIES: PhzF family phenazine biosynthesis protein [Clostridiales]
CD-HSFS000016-HSFS000016I01-CL-USA-2016-017-PK_78_4	1	gi|497577119|ref|WP_009891303.1|	MULTISPECIES: fumarylacetoacetate hydrolase family protein [Clostridiales]
CD-HSFS000016-HSFS000016I01-CL-USA-2016-017-PK_78_40	1	gi|497577165|ref|WP_009891349.1|	MULTISPECIES: hypothetical protein [Clostridiales]
CD-HSFS000016-HSFS000016I01-CL-USA-2016-017-PK_78_41	1	gi|497577167|ref|WP_009891351.1|	MULTISPECIES: AAA family ATPase [Clostridiales]
CD-HSFS000016-HSFS000016I01-CL-USA-2016-017-PK_78_42	1	gi|489527310|ref|WP_003432058.1|	MULTISPECIES: hypothetical protein [Clostridiales]
CD-HSFS000016-HSFS000016I01-CL-USA-2016-017-PK_78_43	1	gi|260210723|emb|CBA65571.1|	proline iminopeptidase [Clostridioides difficile CD196]
CD-HSFS000016-HSFS000016I01-CL-USA-2016-017-PK_78_50	1	gi|497579590|ref|WP_009893774.1|	MULTISPECIES: PTS sugar transporter subunit IIC [Clostridiales]
CD-HSFS000016-HSFS000016I01-CL-USA-2016-017-PK_78_51	1	gi|497577176|ref|WP_009891360.1|	MULTISPECIES: PTS sugar transporter subunit IIB [Clostridiales]
CD-HSFS000016-HSFS000016I01-CL-USA-2016-017-PK_78_52	1	gi|531511869|gb|EQH96963.1|	putative membrane protein [Clostridioides difficile F253]
CD-HSFS000016-HSFS000016I01-CL-USA-2016-017-PK_78_55	1	gi|1341918974|ref|WP_103935449.1|	response regulator transcription factor, partial [Clostridioides difficile]
CD-HSFS000016-HSFS000016I01-CL-USA-2016-017-PK_78_59	1	gi|550530866|ref|WP_022619270.1|	MULTISPECIES: PTS glucose transporter subunit IIA [Clostridiales]
CD-HSFS000016-HSFS000016I01-CL-USA-2016-017-PK_78_6	1	gi|497577125|ref|WP_009891309.1|	MULTISPECIES: D-galactarate dehydratase, partial [Clostridiales]
CD-HSFS000016-HSFS000016I01-CL-USA-2016-017-PK_78_60	1	gi|489535195|ref|WP_003439922.1|	MULTISPECIES: hypothetical protein [Clostridiales]
CD-HSFS000016-HSFS000016I01-CL-USA-2016-017-PK_78_61	1	gi|1443602149|emb|SUY82698.1|	PTS system transporter subunit IIBC [Clostridioides difficile]
CD-HSFS000016-HSFS000016I01-CL-USA-2016-017-PK_78_65	1	gi|497577194|ref|WP_009891378.1|	MULTISPECIES: xylose isomerase [Clostridiales]
CD-HSFS000016-HSFS000016I01-CL-USA-2016-017-PK_78_66	1	gi|260210746|emb|CBA65638.1|	xylulose kinase [Clostridioides difficile CD196]
CD-HSFS000016-HSFS000016I01-CL-USA-2016-017-PK_78_68	1	gi|497577198|ref|WP_009891382.1|	MULTISPECIES: PTS sugar transporter subunit IIA [Clostridiales]
CD-HSFS000016-HSFS000016I01-CL-USA-2016-017-PK_78_70	1	gi|1122518581|ref|WP_074089755.1|	PTS system mannose/fructose/sorbose family transporter subunit IID [Clostridioides difficile]
CD-HSFS000016-HSFS000016I01-CL-USA-2016-017-PK_78_71	1	gi|489526597|ref|WP_003431349.1|	MULTISPECIES: PTS sugar transporter subunit IIC [Clostridiales]
CD-HSFS000016-HSFS000016I01-CL-USA-2016-017-PK_78_73	1	gi|497577200|ref|WP_009891384.1|	MULTISPECIES: DUF523 domain-containing protein [Clostridiales]
CD-HSFS000016-HSFS000016I01-CL-USA-2016-017-PK_78_77	1	gi|489535216|ref|WP_003439943.1|	MULTISPECIES: hypothetical protein [Clostridiales]
CD-HSFS000016-HSFS000016I01-CL-USA-2016-017-PK_78_78	1	gi|489535217|ref|WP_003439944.1|	MULTISPECIES: nucleotidyltransferase domain-containing protein [Clostridiales]
CD-HSFS000016-HSFS000016I01-CL-USA-2016-017-PK_78_79	1	gi|489522448|ref|WP_003427235.1|	MULTISPECIES: hypothetical protein [Clostridiales]
CD-HSFS000016-HSFS000016I01-CL-USA-2016-017-PK_78_8	1	gi|489535117|ref|WP_003439844.1|	MULTISPECIES: IclR family transcriptional regulator [Clostridiales]
CD-HSFS000016-HSFS000016I01-CL-USA-2016-017-PK_78_80	1	gi|497577203|ref|WP_009891387.1|	MULTISPECIES: restriction endonuclease subunit S [Clostridiales]
CD-HSFS000016-HSFS000016I01-CL-USA-2016-017-PK_78_83	1	gi|497577206|ref|WP_009891390.1|	MULTISPECIES: PTS sugar transporter subunit IIA [Clostridiales]
CD-HSFS000016-HSFS000016I01-CL-USA-2016-017-PK_78_84	1	gi|260210762|emb|CBA65683.1|	putative tagatose (1)-phosphate-kinase [Clostridioides difficile CD196]
CD-HSFS000016-HSFS000016I01-CL-USA-2016-017-PK_78_85	1	gi|489522457|ref|WP_003427244.1|	MULTISPECIES: MurR/RpiR family transcriptional regulator [Clostridiales]
CD-HSFS000016-HSFS000016I01-CL-USA-2016-017-PK_83_2	1	gi|497577268|ref|WP_009891452.1|	MULTISPECIES: 6-phosphofructokinase [Clostridiales]
CD-HSFS000016-HSFS000016I01-CL-USA-2016-017-PK_83_29	1	gi|531660975|gb|EQJ38693.1|	oligo-beta-mannoside-specific phosphotransferase enzyme IIB component [Clostridioides difficile P23]
CD-HSFS000016-HSFS000016I01-CL-USA-2016-017-PK_83_3	1	gi|497577267|ref|WP_009891451.1|	MULTISPECIES: pentose-5-phosphate 3-epimerase [Clostridiales]
CD-HSFS000016-HSFS000016I01-CL-USA-2016-017-PK_83_31	1	gi|497577213|ref|WP_009891397.1|	MULTISPECIES: PTS lactose/cellobiose transporter subunit IIA [Clostridiales]
CZWP01000050.1_1	1	gi|531158068|gb|EQE61676.1|	MFS family major facilitator transporter domain protein [Clostridioides difficile CD46]
ERR024642_ST1_134_2	1	gi|497577272|ref|WP_009891456.1|	MULTISPECIES: amidohydrolase [Clostridiales]
ERR026353_ST1_1510_1	1	gi|544979928|ref|WP_021380116.1|	PRD domain-containing protein, partial [Clostridioides difficile]
ERR026357_ST1_751_15	1	gi|497577196|ref|WP_009891380.1|	MULTISPECIES: ROK family transcriptional regulator [Clostridiales]
ERR026357_ST1_751_19	1	gi|497583941|ref|WP_009898125.1|	MULTISPECIES: MurR/RpiR family transcriptional regulator [Clostridiales]
ERR026357_ST1_846_4	1	gi|497583975|ref|WP_009898159.1|	MULTISPECIES: MurR/RpiR family transcriptional regulator [Clostridiales]
ERR026417_ST1_171_10	1	gi|497577255|ref|WP_009891439.1|	MULTISPECIES: M20 family peptidase [Clostridiales]
ERR1544881_ST1_511_8	1	gi|1341890788|ref|WP_103927916.1|	2-keto-3-deoxygluconate permease, partial [Clostridioides difficile]
ERR339894_ST1_103_57	1	gi|489517711|ref|WP_003422523.1|	MULTISPECIES: ABC transporter ATP-binding protein [Clostridiales]
FAEA01000079.1_11	1	gi|531363064|gb|EQG55714.1|	PTS system, glucose-like IIB component domain protein [Clostridioides difficile DA00145]
FAKV01000009.1_67	1	gi|1122454054|ref|WP_074077781.1|	AAA family ATPase [Clostridioides difficile]
FALO01000002.1_81	0.97	gi|1122374574|ref|WP_074048304.1|	transcription antiterminator [Clostridioides difficile]
FANC01000057.1_21	0.93	gi|1122576658|ref|WP_074101291.1|	ECF transporter S component [Clostridioides difficile]
NODE_8_length_146747_cov_54.7074_50	0.99	gi|497577199|ref|WP_009891383.1|	MULTISPECIES: PTS mannose/fructose/sorbose transporter subunit IIB [Clostridiales]
SRR5169300_ST1_777_8	1	gi|531128065|gb|EQE32690.1|	fecCD transport family protein [Clostridioides difficile CD38]
