# Supplementary material for: A global to local genomics analysis of Clostridioides difficile ST1/RT027 identifies cryptic transmission events in a northern Arizona healthcare network
Source: Microb Genom. 2019 May 20;5(7):e000271. doi: 10.1099/mgen.0.000271 (PMC6700662; doi:10.1099/mgen.0.000271)
Supplement: Supplementary File 15 [file mgen-5-271-s0015.xlsx]

## Sheet: TABLE
Table S15. Results for screening genomes for sequences or markers associated with C. difficile virulence
			BSR values for potential virulence factors (Stabler et al. 2009)
Genome	SequenceType		CDR20291_0183	CDR20291_0223	CDR20291_0224	CDR20291_0225	CDR20291_0226	CDR20291_1419	CDR20291_1744	CDR20291_1745	CDR20291_1746	CDR20291_1747	CDR20291_1748	CDR20291_1749	CDR20291_1750	CDR20291_1751	CDR20291_1752	CDR20291_1753	CDR20291_1754	CDR20291_1755	CDR20291_1756	CDR20291_1757	CDR20291_1758	CDR20291_1759	CDR20291_1760	CDR20291_1761	CDR20291_1762	CDR20291_1763	CDR20291_1764	CDR20291_1765	CDR20291_1766	CDR20291_1767	CDR20291_1768	CDR20291_1769	CDR20291_1770	CDR20291_1771	CDR20291_1772	CDR20291_1773	CDR20291_1774	CDR20291_1775	CDR20291_1776	CDR20291_1777	CDR20291_1778	CDR20291_1779	CDR20291_1780	CDR20291_1781	CDR20291_1782	CDR20291_1783	CDR20291_1784
HS-FS-000082-I-02	ST1		0.73	1	1	1	1	1	0.27	0	0	0.25	0.68	0.59	0.74	0.3	0.38	0	0	0.28	0.3	0.22	0.35	0	0	0	0	0.15	0	0	0.08	0	0	0.54	0.57	0.31	0.32	0.39	0.29	0.34	1	0	0.22	0.19	0.1	0	0.23	0	0.26
HS-FS-000084-I-02	ST1		0.73	1	1	1	1	1	0.27	0	0	0.25	0.68	0.59	0.74	0.3	0.38	0	0	0.1	0	0	0	0	0	0	0	0.15	0	0	0.08	0	0	0.12	0.21	0.31	0.3	0.32	0.29	0.34	1	0	0.15	0.19	0.1	0	0	0	0
HS-FS-000103-I-02	ST1		0.73	1	1	1	1	1	0.27	0	0	0.25	0.68	0.59	0.74	0.3	0.38	0	0	0.1	0	0	0	0	0	0	0	0.15	0	0	0.08	0	0	0.12	0.21	0.31	0.3	0.32	0.29	0.34	1	0	0.15	0.19	0.1	0	0	0	0
HS-FS-000127-I-03	ST1		0.73	1	1	1	1	1	0.27	0	0	0.25	0.68	0.59	0.74	0.3	0.38	0	0	0.28	0.3	0	0	0	0	0	0	0.15	0	0	0.08	0	0	0.12	0.21	0.31	0.3	0.39	0.29	0.34	1	0	0.22	0.19	0.1	0	0	0	0
HS-FS-000148-I-02	ST1		0.73	1	1	1	1	1	0.27	0	0	0.25	0.68	0.59	0.74	0.3	0.38	0	0	0.1	0	0	0	0	0	0.41	0	0.15	0	0	0.37	0	0	0.12	0.21	0.31	0.3	0.32	0.29	0.34	1	0	0.15	0.19	0.43	0.2	0	0	0
HS-FS-000151-I-02	ST1		0.73	1	1	1	1	1	0.27	0.46	0	0.27	0.68	0.59	0.74	0.3	0.38	0	0.11	0.28	0.3	0	0	0	0	0	0	0.15	0	0.4	0.08	0	0	0.12	0.21	0.31	0.3	0.39	0.29	0.34	1	0.37	0.22	0.19	0.1	0.22	0	0	0
HS-FS-000173-I-03	ST1		0.73	1	1	1	1	1	0.27	0	0	0.25	0.68	0.59	0.74	0.3	0.38	0	0	0.28	0.3	0	0	0	0	0	0	0.15	0	0	0.08	0	0	0.12	0.21	0.31	0.3	0.39	0.29	0.34	1	0	0.22	0.19	0.1	0	0	0	0
HS-FS-000188-I-02	ST1		0.73	1	1	1	1	1	0.29	0.43	0	0.15	0.68	0.59	0.74	0.3	0.38	0	0	0.1	0	0	0	0	0	0	0	0.15	0	1	1	1	1	1	1	1	1	1	1	1	1	0.59	0.15	0.19	0.44	0	0	0	0
HS-FS-000016-I-01	ST1		0.73	1	1	1	1	1	0.27	0	0	0.25	0.68	0.59	0.74	0.3	0.38	0	0	0.28	0.3	0	0	0	0	0	0	0.15	0	0	0.08	0	0	0.12	0.21	0.31	0.3	0.39	0.29	0.34	1	0	0.22	0.19	0.1	0	0	0	0
HS-FS-000020-I-01	ST1		0.73	1	1	1	1	1	0.29	0.43	0	0.15	0.68	0.59	0.74	0.3	0.38	0	0	0.1	0	0	0	0	0	0	0	0.15	0	1	1	1	1	1	1	1	1	1	1	1	1	0.59	0.15	0.19	0.44	0	0	0	0
HS-FS-000021-I-01	ST1		0.73	1	1	1	1	1	0.29	0.43	0	0.15	0.68	0.59	0.74	0.3	0.38	0	0	0.1	0	0	0	0	0	0	0	0.15	0	1	1	1	1	1	1	1	1	1	1	1	1	0.59	0.15	0.19	0.44	0	0	0	0
HS-FS-000022-I-01	ST1		0.73	1	1	1	1	1	0.29	0.43	0	0.15	0.68	0.59	0.74	0.3	0.38	0	0	0.1	0	0	0	0	0	0	0	0.15	0	1	1	1	1	1	1	1	1	1	1	1	1	0.59	0.15	0.19	0.44	0	0	0	0
HS-FS-000023-I-01	ST1		0.73	1	1	1	1	1	0.27	0	0	0.25	0.68	0.59	0.74	0.3	0.38	0	0	0.28	0.3	0	0	0	0	0	0	0.15	0	0	0.08	0	0	0.12	0.21	0.31	0.3	0.39	0.29	0.34	1	0	0.22	0.19	0.1	0	0	0	0
HS-FS-000024-I-01	ST1		0.73	1	1	1	1	1	0.29	0.43	0	0.15	0.68	0.59	0.74	0.3	0.38	0	0	0.1	0	0	0	0	0	0	0	0.15	0	1	1	1	1	1	1	1	1	1	1	1	1	0.59	0.15	0.19	0.44	0	0	0	0
HS-FS-000025-I-01	ST1		0.73	1	1	1	1	1	0.29	0.43	0	0.15	0.68	0.59	0.74	0.3	0.38	0	0	0.1	0	0	0	0	0	0	0	0.15	0	1	1	1	1	1	1	1	1	1	1	1	1	0.59	0.15	0.19	0.44	0	0	0	0
HS-FS-000027-I-01	ST1		0.73	1	1	1	1	1	0.27	0	0	0.15	0.68	0.59	0.74	0.3	0.38	0	0	0.1	0	0.18	0	0	0	0	0	0.15	0	0	0.09	0	0	0.12	0.21	0.31	0.3	0.23	0.29	0.34	0	0	0.15	0.19	0.1	0	0	0	0
HS-FS-000030-I-01	ST1		0.73	1	1	1	1	1	0.27	0	0	0.25	0.68	0.59	0.74	0.3	0.38	0	0	0.28	0.3	0	0	0	0	0	0	0.15	0	0	0.08	0	0	0.12	0.21	0.31	0.3	0.39	0.29	0.34	1	0	0.22	0.19	0.1	0	0	0	0
HS-FS-000031-I-01	ST1		0.73	1	1	1	1	1	0.29	0.43	0	0.15	0.68	0.59	0.74	0.3	0.38	0	0	0.1	0	0	0	0	0	0	0	0.15	0	1	1	1	1	1	1	1	1	1	1	1	1	0.59	0.15	0.19	0.44	0	0	0	0
HS-FS-000034-I-02	ST1		0.73	1	1	1	1	1	0.29	0.43	0	0.15	0.68	0.59	0.74	0.3	0.38	0	0	0.1	0	0	0	0	0	0	0	0.15	0	1	1	1	1	1	1	1	1	1	1	1	1	0.59	0.15	0.19	0.44	0	0	0	0
HS-FS-000043-I-01	ST1		0.73	1	1	1	1	1	0.29	0.43	0	0.15	0.68	0.59	0.74	0.3	0.38	0	0	0.1	0	0	0	0	0	0	0	0.15	0	1	1	1	1	1	1	1	1	1	1	1	1	0.59	0.15	0.19	0.44	0	0	0	0
HS-FS-000057-I-02	ST1		0.73	1	1	1	1	1	0.29	0.43	0	0.15	0.68	0.59	0.74	0.3	0.38	0	0	0.1	0	0	0	0	0	0	0	0.15	0	1	1	1	1	1	1	1	1	1	1	1	1	0.59	0.15	0.19	0.44	0	0	0	0
HS-FS-000091-I-02	ST1		0.73	1	1	1	1	1	0.29	0.43	0	0.15	0.68	0.59	0.74	0.3	0.38	0	0	0.1	0	0	0	0	0	0	0	0.15	0	1	1	1	1	1	1	1	1	1	1	1	1	0.59	0.15	0.19	0.44	0	0	0	0
HS-FS-000194-I-03	ST1		0.73	1	1	1	1	0.58	0.27	0	0	0.15	0.68	0.59	0.74	0.3	0.38	0	0	0.1	0	0	0	0	0	0	0	0.15	0	0	0.08	0	0	0.12	0.21	0.31	0.3	0.23	0.29	0.34	0	0	0.15	0.19	0.1	0	0	0	0
HS-FS-000251-I-02	ST1		0.73	1	1	1	1	1	0.29	0.43	0	0.15	0.68	0.59	0.74	0.3	0.38	0	0	0.1	0	0	0	0	0	0	0	0.15	0	1	1	1	1	1	1	1	1	1	1	1	1	0.59	0.15	0.19	0.44	0	0	0	0
HS-FS-000264-I-02	ST1		0.73	1	1	1	1	1	0.27	0	0	0.17	0.68	0.59	0.74	0.3	0.38	0	0	0.1	0	0	0	0	0	0	0	0.15	0	0	0.08	0	0	0.12	0.21	0.31	0.3	0.23	0.29	0.34	0	0	0.15	0.19	0.1	0	0	0	0
HS-FS-000287-I-02	ST1		0.73	1	1	1	1	1	0.27	0	0	0.17	0.68	0.59	0.74	0.3	0.38	0	0	0.1	0	0	0	0	0	0	0	0.15	0	0	0.08	0	0	0.12	0.21	0.31	0.3	0.23	0.29	0.34	0	0	0.15	0.19	0.1	0	0	0	0
HS-FS-000292-I-03	ST1		0.73	1	1	1	1	0.97	0.27	0	0	0.15	0.68	0.59	0.74	0.3	0.38	0	0	0.1	0	0	0	0	0	0	0	0.15	0	0	0.08	0	0	0.12	0.21	0.31	0.3	0.23	0.29	0.34	0	0	0.15	0.19	0.1	0	0	0	0
ERR024642_ST1	ST1		0.73	1	1	1	1	1	0.29	0.43	0	0.15	0.68	0.59	0.74	0.3	0.38	0	0	0.1	0	0	0	0	0	0	0	0.15	0	1	1	1	1	1	1	1	1	1	1	1	1	0.59	0.15	0.19	0.44	0	0	0	0
ERR024643_ST1	ST1		0.73	1	1	1	1	1	0.29	0.43	0	0.15	0.68	0.59	0.74	0.3	0.38	0	0	0.1	0	0	0	0	0	0	0	0.15	0	1	1	1	1	1	1	1	1	1	1	1	1	0.59	0.15	0.19	0.44	0	0	0	0
ERR024646_ST1	ST1		0.73	1	1	1	1	1	0.29	0.43	0	0.15	0.68	0.59	0.74	0.3	0.38	0	0	0.1	0	0	0	0	0	0	0	0.15	0	1	1	1	1	1	1	1	1	1	1	1	1	0.59	0.15	0.19	0.44	0	0	0	0
ERR024647_ST1	ST1		0.73	1	1	1	1	1	0.29	0.43	0	0.21	0.68	0.59	0.74	0.3	0.38	0	0	0.1	0	0	0.05	0	0	0.43	0	0.15	0	1	1	1	1	1	1	1	1	1	1	1	1	0.59	0.15	0.19	0.44	0	0	0	0
ERR024648_ST1	ST1		0.73	1	1	1	1	1	0.29	0.43	0	0.15	0.68	0.59	0.74	0.3	0.38	0	0	0.1	0	0	0	0	0	0	0	0.15	0	1	1	1	1	1	1	1	1	1	1	1	1	0.59	0.15	0.19	0.44	0	0	0	0
ERR024649_ST1	ST1		0.73	1	1	1	1	1	0.29	0.43	0	0.21	0.68	0.59	0.74	0.3	0.38	0	0	0.1	0	0	0.05	0	0	0.43	0	0.15	0	1	1	1	1	1	1	1	1	1	1	1	1	0.59	0.15	0.19	0.44	0	0	0	0
ERR024650_ST1	ST1		0.73	1	1	1	1	1	0.29	0.43	0	0.21	0.68	0.59	0.74	0.3	0.38	0	0	0.1	0	0	0.05	0	0	0.43	0	0.15	0	1	1	1	1	1	1	1	1	1	1	1	1	0.59	0.15	0.19	0.44	0	0	0	0
ERR024651_ST1	ST1		0.73	1	1	1	1	1	0.29	0.43	0	0.21	0.68	0.59	0.74	0.3	0.38	0	0	0.1	0	0	0.05	0	0	0.43	0	0.15	0	1	1	1	1	1	1	1	1	1	1	1	1	0.59	0.15	0.19	0.44	0	0	0	0
ERR024652_ST1	ST1		0.73	1	1	1	1	1	0.29	0.43	0	0.15	0.68	0.59	0.74	0.3	0.38	0	0	0.1	0	0	0	0	0	0	0	0.15	0	1	1	1	1	1	1	1	1	1	1	1	1	0.59	0.15	0.19	0.44	0	0	0	0
ERR024653_ST1	ST1		0.73	1	1	1	1	1	0.29	0.43	0	0.15	0.68	0.59	0.74	0.3	0.38	0	0	0.1	0	0	0	0	0	0	0	0.15	0	1	1	1	1	1	1	1	1	1	1	1	1	0.59	0.15	0.19	0.44	0	0	0	0
ERR024655_ST1	ST1		0.73	1	1	1	1	1	0.29	0.43	0	0.15	0.68	0.59	0.74	0.3	0.38	0	0	0.1	0	0	0	0	0	0	0	0.15	0	1	1	1	1	1	1	1	1	1	1	1	1	0.59	0.15	0.19	0.44	0	0	0	0
ERR024656_ST1	ST1		0.73	1	1	1	1	1	0.29	0.43	0	0.15	0.68	0.59	0.74	0.3	0.38	0	0	0.1	0	0	0	0	0	0	0	0.15	0	1	1	1	1	1	1	1	1	1	1	1	1	0.59	0.15	0.19	0.44	0	0	0	0
ERR024657_ST1	ST1		0.73	1	1	1	1	1	0.29	0.43	0	0.15	0.68	0.59	0.74	0.3	0.38	0	0	0.1	0	0	0	0	0	0	0	0.15	0	1	1	1	1	1	1	1	1	1	1	1	1	0.59	0.15	0.19	0.44	0	0	0	0
ERR024659_ST1	ST1		0.73	1	1	1	1	1	0.29	0.43	0	0.15	0.68	0.59	0.74	0.3	0.38	0	0	0.1	0	0	0	0	0	0	0	0.15	0	1	1	1	1	1	1	1	1	1	1	1	1	0.59	0.15	0.19	0.44	0	0	0	0
ERR024660_ST1	ST1		0.73	1	1	1	1	1	0.29	0.43	0	0.15	0.68	0.59	0.74	0.3	0.38	0	0	0.1	0	0	0	0	0	0	0	0.15	0	1	1	1	1	1	1	1	1	1	1	1	1	0.59	0.15	0.19	0.44	0	0	0	0
ERR024661_ST1	ST1		0.73	1	1	1	1	1	0.29	0.43	0	0.21	0.68	0.59	0.74	0.3	0.38	0	0	0.1	0	0	0.05	0	0	0.43	0	0.15	0	1	1	1	1	1	1	1	1	1	1	1	1	0.59	0.15	0.19	0.44	0	0	0	0
ERR024662_ST1	ST1		0.73	1	1	1	1	1	0.29	0.43	0	0.15	0.68	0.59	0.74	0.3	0.38	0	0	0.1	0	0	0	0	0	0	0	0.15	0	1	1	1	1	1	1	1	1	1	1	1	1	0.59	0.15	0.19	0.44	0	0	0	0
ERR024663_ST1	ST1		0.73	1	1	1	1	1	0.29	0.43	0	0.15	0.68	0.59	0.74	0.3	0.38	0	0	0.1	0	0	0	0	0	0	0	0.15	0	1	1	1	1	1	1	1	1	1	1	1	1	0.59	0.15	0.19	0.44	0	0	0	0
ERR024664_ST1	ST1		0.73	1	1	1	1	1	0.29	0.43	0	0.15	0.68	0.59	0.74	0.3	0.38	0	0	0.1	0	0	0	0	0	0	0	0.15	0	1	1	1	1	1	1	1	1	1	1	1	1	0.59	0.15	0.19	0.44	0	0	0	0
ERR024665_ST1	ST1		0.73	1	1	1	1	1	0.29	0.43	0	0.15	0.68	0.59	0.74	0.3	0.38	0	0	0.1	0	0	0	0	0	0	0	0.15	0	1	1	1	1	1	1	1	1	1	1	1	1	0.59	0.15	0.19	0.44	0	0	0	0
ERR024666_ST1	ST1		0.73	1	1	1	1	1	0.29	0.43	0	0.15	0.68	0.59	0.74	0.3	0.38	0	0	0.1	0	0	0	0	0	0	0	0.15	0	1	1	1	1	1	1	1	1	1	1	1	1	0.59	0.15	0.19	0.44	0	0	0	0
ERR024996_ST1	ST1		0.73	1	1	1	1	1	0.27	0	0	0.25	0.68	0.59	0.74	0.3	0.38	0	0	0.1	0	0	0	0	0	0	0	0.15	0	0	0.08	0	0	0.12	0.21	0.31	0.3	0.36	0.29	0.34	1	0	0.15	0.19	0.1	0	0	0	0
ERR024997_ST1	ST1		0.73	1	1	1	1	1	0.27	0	0	0.25	0.68	0.59	0.74	0.3	0.38	0	0	0.1	0	0	0	0	0	0	0	0.15	0	0	0.08	0	0	0.12	0.21	0.31	0.3	0.36	0.29	0.34	1	0	0.15	0.19	0.1	0	0	0	0
ERR024998_ST1	ST1		0.73	1	1	1	1	1	0.27	0	0	0.25	0.68	0.59	0.74	0.3	0.38	0	0	0.1	0	0	0	0	0	0	0	0.15	0	0	0.08	0	0	0.12	0.21	0.31	0.3	0.36	0.29	0.34	1	0	0.15	0.19	0.1	0	0	0	0
ERR024999_ST1	ST1		0.73	1	1	1	1	1	0.27	0	0	0.25	0.68	0.59	0.74	0.3	0.38	0	0	0.1	0	0	0	0	0	0	0	0.15	0	0	0.08	0	0	0.12	0.21	0.31	0.3	0.36	0.29	0.34	1	0	0.15	0.19	0.1	0	0	0	0
ERR025000_ST1	ST1		0.73	1	1	1	1	1	0.27	0	0	0.25	0.68	0.59	0.74	0.3	0.38	0	0	0.1	0	0	0	0	0	0	0	0.15	0	0	0.08	0	0	0.12	0.21	0.31	0.3	0.36	0.29	0.34	1	0	0.15	0.19	0.1	0	0	0	0
ERR025001_ST1	ST1		0.73	1	1	1	1	1	0.27	0	0	0.25	0.68	0.59	0.74	0.3	0.38	0	0	0.1	0	0	0	0	0	0	0	0.15	0	0	0.08	0	0	0.12	0.21	0.31	0.3	0.36	0.29	0.34	1	0	0.15	0.19	0.1	0	0	0	0
ERR025002_ST1	ST1		0.73	1	1	1	1	1	0.27	0	0	0.25	0.68	0.59	0.74	0.3	0.38	0	0	0.1	0	0	0	0	0	0	0	0.15	0	0	0.08	0	0	0.12	0.21	0.31	0.3	0.36	0.29	0.34	1	0	0.15	0.19	0.1	0	0	0	0
ERR025003_ST1	ST1		0.73	1	1	1	1	1	0.27	0	0	0.25	0.68	0.59	0.74	0.3	0.38	0	0	0.1	0	0	0	0	0	0	0	0.15	0	0	0.08	0	0	0.12	0.21	0.31	0.3	0.36	0.29	0.34	1	0	0.15	0.19	0.1	0	0	0	0
ERR025004_ST1	ST1		0.73	1	1	1	1	1	0.27	0	0	0.25	0.68	0.59	0.74	0.3	0.38	0	0	0.1	0	0	0	0	0	0	0	0.15	0	0	0.08	0	0	0.12	0.21	0.31	0.3	0.36	0.29	0.34	1	0	0.15	0.19	0.1	0	0	0	0
ERR025005_ST1	ST1		0.73	1	1	1	1	1	0.27	0	0	0.25	0.68	0.59	0.74	0.3	0.38	0	0	0.1	0	0	0	0	0	0	0	0.15	0	0	0.08	0	0	0.12	0.21	0.31	0.3	0.36	0.29	0.34	1	0	0.15	0.19	0.1	0	0	0	0
ERR025006_ST1	ST1		0.73	1	1	1	1	1	0.27	0	0	0.25	0.68	0.59	0.74	0.3	0.38	0	0	0.1	0	0	0	0	0	0	0	0.15	0	0	0.08	0	0	0.12	0.21	0.31	0.3	0.36	0.29	0.34	1	0	0.15	0.19	0.1	0	0	0	0
ERR025007_ST1	ST1		0.73	1	1	1	1	1	0.27	0	0	0.25	0.68	0.59	0.74	0.3	0.38	0	0	0.1	0	0	0	0	0	0	0	0.15	0	0	0.08	0	0	0.12	0.21	0.31	0.3	0.36	0.29	0.34	1	0	0.15	0.19	0.1	0	0	0	0
ERR025010_ST1	ST1		0.73	1	1	1	1	1	0.27	0	0	0.25	0.68	0.59	0.74	0.3	0.38	0	0	0.1	0	0	0	0	0	0	0	0.15	0	0	0.08	0	0	0.12	0.21	0.31	0.3	0.36	0.29	0.34	1	0	0.15	0.19	0.1	0	0	0	0
ERR025011_ST1	ST1		0.73	1	1	1	1	1	0.27	0	0	0.25	0.68	0.59	0.74	0.3	0.38	0	0	0.1	0	0	0	0	0	0	0	0.15	0	0	0.08	0	0	0.12	0.21	0.31	0.3	0.36	0.29	0.34	1	0	0.15	0.19	0.1	0	0	0	0
ERR025012_ST1	ST1		0.73	1	1	1	1	1	0.27	0	0	0.25	0.68	0.59	0.74	0.3	0.38	0	0	0.1	0	0	0	0	0	0	0	0.15	0	0	0.08	0	0	0.12	0.21	0.31	0.3	0.36	0.29	0.34	1	0	0.15	0.19	0.1	0	0	0	0
ERR025014_ST1	ST1		0.73	1	1	1	1	1	0.27	0	0	0.25	0.68	0.59	0.74	0.3	0.38	0	0	0.1	0	0	0	0	0	0	0	0.15	0	0	0.08	0	0	0.12	0.21	0.31	0.3	0.36	0.29	0.34	1	0	0.15	0.19	0.1	0	0	0	0
ERR025015_ST1	ST1		0.73	1	1	1	1	1	0.27	0	0	0.25	0.68	0.59	0.74	0.3	0.38	0	0	0.1	0	0	0	0	0	0	0	0.15	0	0	0.08	0	0	0.12	0.21	0.31	0.3	0.36	0.29	0.34	1	0	0.15	0.19	0.1	0	0	0	0
ERR025016_ST1	ST1		0.73	1	1	1	1	1	0.27	0	0	0.25	0.68	0.59	0.74	0.3	0.38	0	0	0.1	0	0	0	0	0	0	0	0.15	0	0	0.08	0	0	0.12	0.21	0.31	0.3	0.36	0.29	0.34	1	0	0.15	0.19	0.1	0	0	0	0
ERR025017_ST1	ST1		0.73	1	1	1	1	1	0.27	0	0	0.25	0.68	0.59	0.74	0.3	0.38	0	0	0.1	0	0	0	0	0	0	0	0.15	0	0	0.08	0	0	0.12	0.21	0.31	0.3	0.36	0.29	0.34	1	0	0.15	0.19	0.1	0	0	0	0
ERR025018_ST1	ST1		0.73	1	1	1	1	1	0.27	0	0	0.25	0.68	0.59	0.74	0.3	0.38	0	0	0.1	0	0	0	0	0	0	0	0.15	0	0	0.08	0	0	0.12	0.21	0.31	0.3	0.36	0.29	0.34	1	0	0.15	0.19	0.1	0	0	0	0
ERR025019_ST1	ST1		0.73	1	1	1	1	1	0.27	0	0	0.25	0.68	0.59	0.74	0.3	0.38	0	0	0.1	0	0	0	0	0	0	0	0.15	0	0	0.08	0	0	0.12	0.21	0.31	0.3	0.36	0.29	0.34	1	0	0.15	0.19	0.1	0	0	0	0
ERR025020_ST1	ST1		0.73	1	1	1	1	1	0.27	0	0	0.25	0.68	0.59	0.74	0.3	0.38	0	0	0.1	0	0	0	0	0	0	0	0.15	0	0	0.08	0	0	0.12	0.21	0.31	0.3	0.36	0.29	0.34	1	0	0.15	0.19	0.1	0	0	0	0
ERR025023_ST1	ST1		0.73	1	1	1	1	1	0.27	0	0	0.25	0.68	0.59	0.74	0.3	0.38	0	0	0.1	0	0	0	0	0	0	0	0.15	0	0	0.08	0	0	0.12	0.21	0.31	0.3	0.36	0.29	0.34	1	0	0.15	0.19	0.1	0	0	0	0
ERR025024_ST1	ST1		0.73	1	1	1	1	1	0.27	0	0	0.25	0.68	0.59	0.74	0.3	0.38	0	0	0.1	0	0	0	0	0	0	0	0.15	0	0	0.08	0	0	0.12	0.21	0.31	0.3	0.36	0.29	0.34	1	0	0.15	0.19	0.1	0	0	0	0
ERR025025_ST1	ST1		0.73	1	1	1	1	1	0.27	0	0	0.25	0.68	0.59	0.74	0.3	0.38	0	0	0.1	0	0	0	0	0	0	0	0.15	0	0	0.08	0	0	0.12	0.21	0.31	0.3	0.36	0.29	0.34	1	0	0.15	0.19	0.1	0	0	0	0
ERR025026_ST1	ST1		0.73	1	1	1	1	1	0.27	0	0	0.25	0.68	0.59	0.74	0.3	0.38	0	0	0.1	0	0	0	0	0	0	0	0.15	0	0	0.08	0	0	0.12	0.21	0.31	0.3	0.36	0.29	0.34	1	0	0.15	0.19	0.1	0	0	0	0
ERR025027_ST1	ST1		0.73	1	1	1	1	1	0.27	0	0	0.25	0.68	0.59	0.74	0.3	0.38	0	0	0.1	0	0	0	0	0	0	0	0.15	0	0	0.08	0	0	0.12	0.21	0.31	0.3	0.36	0.29	0.34	1	0	0.15	0.19	0.1	0	0	0	0
ERR025028_ST1	ST1		0.73	1	1	1	1	1	0.27	0	0	0.25	0.68	0.59	0.74	0.3	0.38	0	0	0.1	0	0	0	0	0	0	0	0.15	0	0	0.08	0	0	0.12	0.21	0.31	0.3	0.36	0.29	0.34	1	0	0.15	0.19	0.1	0	0	0	0
ERR025029_ST1	ST1		0.73	1	1	1	1	1	0.27	0	0	0.25	0.68	0.59	0.74	0.3	0.38	0	0	0.1	0	0	0	0	0	0	0	0.15	0	0	0.08	0	0	0.12	0.21	0.31	0.3	0.36	0.29	0.34	1	0	0.15	0.19	0.1	0	0	0	0
ERR025030_ST1	ST1		0.73	1	1	1	1	1	0.27	0	0	0.25	0.68	0.59	0.74	0.3	0.38	0	0	0.1	0	0	0	0	0	0	0	0.15	0	0	0.08	0	0	0.12	0.21	0.31	0.3	0.36	0.29	0.34	1	0	0.15	0.19	0.1	0	0	0	0
ERR025031_ST1	ST1		0.73	1	1	1	1	1	0.27	0	0	0.25	0.68	0.59	0.74	0.3	0.38	0	0	0.1	0	0	0	0	0	0	0	0.15	0	0	0.08	0	0	0.12	0.21	0.31	0.3	0.36	0.29	0.34	1	0	0.15	0.19	0.1	0	0	0	0
ERR025032_ST1	ST1		0.73	1	1	1	1	1	0.27	0	0	0.25	0.68	0.59	0.74	0.3	0.38	0	0	0.1	0	0	0	0	0	0	0	0.15	0	0	0.08	0	0	0.12	0.21	0.31	0.3	0.36	0.29	0.34	1	0	0.15	0.19	0.1	0	0	0	0
ERR025033_ST1	ST1		0.73	1	1	1	1	1	0.27	0	0	0.25	0.68	0.59	0.74	0.3	0.38	0	0	0.1	0	0	0	0	0	0	0	0.15	0	0	0.08	0	0	0.12	0.21	0.31	0.3	0.36	0.29	0.34	1	0	0.15	0.19	0.1	0	0	0	0
ERR025035_ST1	ST1		0.73	1	1	1	1	1	0.27	0	0	0.25	0.68	0.59	0.74	0.3	0.38	0	0	0.1	0	0	0	0	0	0	0	0.15	0	0	0.08	0	0	0.12	0.21	0.31	0.3	0.36	0.29	0.34	1	0	0.15	0.19	0.1	0	0	0	0
ERR025036_ST1	ST1		0.73	1	1	1	1	1	0.27	0	0	0.25	0.68	0.59	0.74	0.3	0.38	0	0	0.1	0	0	0	0	0	0	0	0.15	0	0	0.08	0	0	0.12	0.21	0.31	0.3	0.36	0.29	0.34	1	0	0.15	0.19	0.1	0	0	0	0
ERR025038_ST1	ST1		0.73	1	1	1	1	1	0.27	0	0	0.25	0.68	0.59	0.74	0.3	0.38	0	0	0.1	0	0	0	0	0	0	0	0.15	0	0	0.08	0	0	0.12	0.21	0.31	0.3	0.36	0.29	0.34	1	0	0.15	0.19	0.1	0	0	0	0
ERR025039_ST1	ST1		0.73	1	1	1	1	1	0.27	0	0	0.25	0.68	0.59	0.74	0.3	0.38	0	0	0.1	0	0	0	0	0	0	0	0.15	0	0	0.08	0	0	0.12	0.21	0.31	0.3	0.36	0.29	0.34	1	0	0.15	0.19	0.1	0	0	0	0
ERR025040_ST1	ST1		0.73	1	1	1	1	1	0.27	0	0	0.25	0.68	0.59	0.74	0.3	0.38	0	0	0.1	0	0	0	0	0	0	0	0.15	0	0	0.08	0	0	0.12	0.21	0.31	0.3	0.36	0.29	0.34	1	0	0.15	0.19	0.1	0	0	0	0
ERR025041_ST1	ST1		0.73	1	1	1	1	1	0.27	0	0	0.25	0.68	0.59	0.74	0.3	0.38	0	0	0.1	0	0	0	0	0	0	0	0.15	0	0	0.08	0	0	0.12	0.21	0.31	0.3	0.36	0.29	0.34	1	0	0.15	0.19	0.1	0	0	0	0
ERR025042_ST1	ST1		0.73	1	1	1	1	1	0.27	0	0	0.25	0.68	0.59	0.74	0.3	0.38	0	0	0.1	0	0	0	0	0	0	0	0.15	0	0	0.08	0	0	0.12	0.21	0.31	0.3	0.36	0.29	0.34	1	0	0.15	0.19	0.1	0	0	0	0
ERR025043_ST1	ST1		0.73	1	1	1	1	1	0.27	0	0	0.25	0.68	0.59	0.74	0.3	0.38	0	0	0.1	0	0	0	0	0	0	0	0.15	0	0	0.08	0	0	0.12	0.21	0.31	0.3	0.36	0.29	0.34	1	0	0.15	0.19	0.1	0	0	0	0
ERR025044_ST1	ST1		0.73	1	1	1	1	1	0.27	0	0	0.25	0.68	0.59	0.74	0.3	0.38	0	0	0.1	0	0	0	0	0	0	0	0.15	0	0	0.08	0	0	0.12	0.21	0.31	0.3	0.36	0.29	0.34	1	0	0.15	0.19	0.1	0	0	0	0
ERR025045_ST1	ST1		0.73	1	1	1	1	1	0.27	0	0	0.25	0.68	0.59	0.74	0.3	0.38	0	0	0.1	0	0	0	0	0	0	0	0.15	0	0	0.08	0	0	0.12	0.21	0.31	0.3	0.36	0.29	0.34	1	0	0.15	0.19	0.1	0	0	0	0
ERR025048_ST1	ST1		0.73	1	1	1	1	1	0.27	0	0	0.25	0.68	0.59	0.74	0.3	0.38	0	0	0.1	0	0	0	0	0	0	0	0.15	0	0	0.08	0	0	0.12	0.21	0.31	0.3	0.36	0.29	0.34	1	0	0.15	0.19	0.1	0	0	0	0
ERR025049_ST1	ST1		0.73	1	1	1	1	1	0.27	0	0	0.25	0.68	0.59	0.74	0.3	0.38	0	0	0.1	0	0	0	0	0	0	0	0.15	0	0	0.08	0	0	0.12	0.21	0.31	0.3	0.36	0.29	0.34	1	0	0.15	0.19	0.1	0	0	0	0
ERR025050_ST1	ST1		0.73	1	1	1	1	1	0.27	0	0	0.25	0.68	0.59	0.74	0.3	0.38	0	0	0.1	0	0	0	0	0	0	0	0.15	0	0	0.08	0	0	0.12	0.21	0.31	0.3	0.36	0.29	0.34	1	0	0.15	0.19	0.1	0	0	0	0
ERR025051_ST1	ST1		0.73	1	1	1	1	1	0.27	0	0	0.25	0.68	0.59	0.74	0.3	0.38	0	0	0.1	0	0	0	0	0	0	0	0.15	0	0	0.08	0	0	0.12	0.21	0.31	0.3	0.36	0.29	0.34	1	0	0.15	0.19	0.1	0	0	0	0
ERR025052_ST1	ST1		0.73	1	1	1	1	1	0.27	0	0	0.25	0.68	0.59	0.74	0.3	0.38	0	0	0.1	0	0	0	0	0	0	0	0.15	0	0	0.08	0	0	0.12	0.21	0.31	0.3	0.36	0.29	0.34	1	0	0.15	0.19	0.1	0	0	0	0
ERR025053_ST1	ST1		0.73	1	1	1	1	1	0.27	0	0	0.25	0.68	0.59	0.74	0.3	0.38	0	0	0.1	0	0	0	0	0	0	0	0.15	0	0	0.08	0	0	0.12	0.21	0.31	0.3	0.36	0.29	0.34	1	0	0.15	0.19	0.1	0	0	0	0
ERR025054_ST1	ST1		0.73	1	1	1	1	1	0.27	0	0	0.25	0.68	0.59	0.74	0.3	0.38	0	0	0.1	0	0	0	0	0	0	0	0.15	0	0	0.08	0	0	0.12	0.21	0.31	0.3	0.36	0.29	0.34	1	0	0.15	0.19	0.1	0	0	0	0
ERR025055_ST1	ST1		0.73	1	1	1	1	1	0.27	0	0	0.25	0.68	0.59	0.74	0.3	0.38	0	0	0.1	0	0	0	0	0	0	0	0.15	0	0	0.08	0	0	0.12	0.21	0.31	0.3	0.36	0.29	0.34	1	0	0.15	0.19	0.1	0	0	0	0
ERR025056_ST1	ST1		0.73	1	1	1	1	1	0.27	0	0	0.25	0.68	0.59	0.74	0.3	0.38	0	0	0.1	0	0	0	0	0	0	0	0.15	0	0	0.08	0	0	0.12	0.21	0.31	0.3	0.36	0.29	0.34	1	0	0.15	0.19	0.1	0	0	0	0
ERR025058_ST1	ST1		0.73	1	1	1	1	1	0.27	0	0	0.25	0.68	0.59	0.74	0.3	0.38	0	0	0.1	0	0	0	0	0	0	0	0.15	0	0	0.08	0	0	0.12	0.21	0.31	0.3	0.36	0.29	0.34	1	0	0.15	0.19	0.1	0	0	0	0
ERR025059_ST1	ST1		0.73	1	1	1	1	1	0.27	0	0	0.25	0.68	0.59	0.74	0.3	0.38	0	0	0.1	0	0	0	0	0	0	0	0.15	0	0	0.08	0	0	0.12	0.21	0.31	0.3	0.36	0.29	0.34	1	0	0.15	0.19	0.1	0	0	0	0
ERR025061_ST1	ST1		0.73	1	1	1	1	1	0.27	0	0	0.25	0.68	0.59	0.74	0.3	0.38	0	0	0.1	0	0	0	0	0	0	0	0.15	0	0	0.08	0	0	0.12	0.21	0.31	0.3	0.36	0.29	0.34	1	0	0.15	0.19	0.1	0	0	0	0
ERR025062_ST1	ST1		0.73	1	1	1	1	1	0.27	0	0	0.25	0.68	0.59	0.74	0.3	0.38	0	0	0.1	0	0	0	0	0	0	0	0.15	0	0	0.08	0	0	0.12	0.21	0.31	0.3	0.36	0.29	0.34	1	0	0.15	0.19	0.1	0	0	0	0
ERR025063_ST1	ST1		0.73	1	1	1	1	1	0.27	0	0	0.25	0.68	0.59	0.74	0.3	0.38	0	0	0.1	0	0	0	0	0	0	0	0.15	0	0	0.08	0	0	0.12	0.21	0.31	0.3	0.36	0.29	0.34	1	0	0.15	0.19	0.1	0	0	0	0
ERR025064_ST1	ST1		0.73	1	1	1	1	1	0.27	0	0	0.25	0.68	0.59	0.74	0.3	0.38	0	0	0.1	0	0	0	0	0	0	0	0.15	0	0	0.08	0	0	0.12	0.21	0.31	0.3	0.36	0.29	0.34	1	0	0.15	0.19	0.1	0	0	0	0
ERR025065_ST1	ST1		0.73	1	1	1	1	1	0.27	0	0	0.25	0.68	0.59	0.74	0.3	0.38	0	0	0.1	0	0	0	0	0	0	0	0.15	0	0	0.08	0	0	0.12	0.21	0.31	0.3	0.36	0.29	0.34	1	0	0.15	0.19	0.1	0	0	0	0
ERR025066_ST1	ST1		0.73	1	1	1	1	1	0.27	0	0	0.25	0.68	0.59	0.74	0.3	0.38	0	0	0.1	0	0	0	0	0	0	0	0.15	0	0	0.08	0	0	0.12	0.21	0.31	0.3	0.36	0.29	0.34	1	0	0.15	0.19	0.1	0	0	0	0
ERR025069_ST1	ST1		0.73	1	1	1	1	1	0.27	0	0	0.25	0.68	0.59	0.74	0.3	0.38	0	0	0.1	0	0	0	0	0	0	0	0.15	0	0	0.08	0	0	0.12	0.21	0.31	0.3	0.36	0.29	0.34	1	0	0.15	0.19	0.1	0	0	0	0
ERR025070_ST1	ST1		0.73	1	1	1	1	1	0.27	0	0	0.25	0.68	0.59	0.74	0.3	0.38	0	0	0.1	0	0	0	0	0	0	0	0.15	0	0	0.08	0	0	0.12	0.21	0.31	0.3	0.36	0.29	0.34	1	0	0.15	0.19	0.1	0	0	0	0
ERR025072_ST1	ST1		0.73	1	1	1	1	1	0.27	0	0	0.25	0.68	0.59	0.74	0.3	0.38	0	0	0.1	0	0	0	0	0	0	0	0.15	0	0	0.08	0	0	0.12	0.21	0.31	0.3	0.36	0.29	0.34	1	0	0.15	0.19	0.1	0	0	0	0
ERR025330_ST1	ST1		0.73	1	1	1	1	1	0.27	0	0	0.25	0.68	0.59	0.74	0.3	0.38	0	0	0.1	0	0	0	0	0	0	0	0.15	0	0	0.08	0	0	0.12	0.21	0.31	0.3	0.36	0.29	0.34	1	0	0.15	0.19	0.1	0	0	0	0
ERR025331_ST1	ST1		0.73	1	1	1	1	1	0.27	0	0	0.25	0.68	0.59	0.74	0.3	0.38	0	0	0.1	0	0	0	0	0	0	0	0.15	0	0	0.08	0	0	0.12	0.21	0.31	0.3	0.36	0.29	0.34	1	0	0.15	0.19	0.1	0	0	0	0
ERR025332_ST1	ST1		0.73	1	1	1	1	1	0.27	0	0	0.25	0.68	0.59	0.74	0.3	0.38	0	0	0.1	0	0	0	0	0	0	0	0.15	0	0	0.08	0	0	0.12	0.21	0.31	0.3	0.36	0.29	0.34	1	0	0.15	0.19	0.1	0	0	0	0
ERR025333_ST1	ST1		0.73	1	1	1	1	1	0.27	0	0	0.25	0.68	0.59	0.74	0.3	0.38	0	0	0.1	0	0	0	0	0	0	0	0.15	0	0	0.08	0	0	0.12	0.21	0.31	0.3	0.36	0.29	0.34	1	0	0.15	0.19	0.1	0	0	0	0
ERR025334_ST1	ST1		0.73	1	1	1	1	1	0.27	0	0	0.25	0.68	0.59	0.74	0.3	0.38	0	0	0.1	0	0	0	0	0	0	0	0.15	0	0	0.08	0	0	0.12	0.21	0.31	0.3	0.36	0.29	0.34	1	0	0.15	0.19	0.1	0	0	0	0
ERR025335_ST1	ST1		0.73	1	1	1	1	1	0.27	0	0	0.25	0.68	0.59	0.74	0.3	0.38	0	0	0.1	0	0	0	0	0	0	0	0.15	0	0	0.08	0	0	0.12	0.21	0.31	0.3	0.36	0.29	0.34	1	0	0.15	0.19	0.1	0	0	0	0
ERR025336_ST1	ST1		0.73	1	1	1	1	1	0.27	0	0	0.25	0.68	0.59	0.74	0.3	0.38	0	0	0.1	0	0	0	0	0	0	0	0.15	0	0	0.08	0	0	0.12	0.21	0.31	0.3	0.36	0.29	0.34	1	0	0.15	0.19	0.1	0	0	0	0
ERR025337_ST1	ST1		0.73	1	1	1	1	1	0.27	0	0	0.25	0.68	0.59	0.74	0.3	0.38	0	0	0.1	0	0	0	0	0	0	0	0.15	0	0	0.08	0	0	0.12	0.21	0.31	0.3	0.36	0.29	0.34	1	0	0.15	0.19	0.1	0	0	0	0
ERR025338_ST1	ST1		0.73	1	1	1	1	1	0.27	0	0	0.25	0.68	0.59	0.74	0.3	0.38	0	0	0.1	0	0	0	0	0	0	0	0.15	0	0	0.08	0	0	0.12	0.21	0.31	0.3	0.36	0.29	0.34	1	0	0.15	0.19	0.1	0	0	0	0
ERR025340_ST1	ST1		0.73	1	1	1	1	1	0.27	0	0	0.25	0.68	0.59	0.74	0.3	0.38	0	0	0.1	0	0	0	0	0	0	0	0.15	0	0	0.08	0	0	0.12	0.21	0.31	0.3	0.36	0.29	0.34	1	0	0.15	0.19	0.1	0	0	0	0
ERR025341_ST1	ST1		0.73	1	1	1	1	1	0.27	0	0	0.25	0.68	0.59	0.74	0.3	0.38	0	0	0.1	0	0	0	0	0	0	0	0.15	0	0	0.08	0	0	0.12	0.21	0.31	0.3	0.36	0.29	0.34	1	0	0.15	0.19	0.1	0	0	0	0
ERR025343_ST1	ST1		0.73	1	1	1	1	1	0.27	0	0	0.15	0.68	0.59	0.74	0.3	0.38	0	0	0.1	0	0	0	0	0	0	0	0.15	0	0	0.08	0	0	0.12	0.21	0.31	0.3	0.23	0.29	0.34	0	0	0.15	0.19	0.1	0	0	0	0
ERR025344_ST1	ST1		0.73	1	1	1	1	1	0.29	0.43	0	0.15	0.68	0.59	0.74	0.3	0.38	0	0	0.1	0	0	0	0	0	0	0	0.15	0	1	1	1	1	1	1	1	1	1	1	1	1	0.59	0.15	0.19	0.44	0	0	0	0
ERR025345_ST1	ST1		0.73	1	1	1	1	1	0.29	0.43	0	0.15	0.68	0.59	0.74	0.3	0.38	0	0	0.1	0	0	0	0	0	0	0	0.15	0	1	1	1	1	1	1	1	1	1	1	1	1	0.59	0.15	0.19	0.44	0	0	0	0
ERR025346_ST1	ST1		0.73	1	1	1	1	1	0.29	0.43	0	0.15	0.68	0.59	0.74	0.3	0.38	0	0	0.1	0	0	0	0	0	0	0	0.15	0	1	1	1	1	1	1	1	1	1	1	1	1	0.59	0.15	0.19	0.44	0	0	0	0
ERR025347_ST1	ST1		0.73	1	1	1	1	1	0.29	0.43	0	0.15	0.68	0.59	0.74	0.3	0.38	0	0	0.1	0	0	0	0	0	0	0	0.15	0	1	1	1	1	1	1	1	1	1	1	1	1	0.59	0.15	0.19	0.44	0	0	0	0
ERR025348_ST1	ST1		0.73	1	1	1	1	1	0.29	0.43	0	0.15	0.68	0.59	0.74	0.3	0.38	0	0	0.1	0	0	0	0	0	0	0	0.15	0	1	1	1	1	1	1	1	1	1	1	1	1	0.59	0.15	0.19	0.44	0	0	0	0
ERR025350_ST1	ST1		0.73	1	1	1	1	1	1	1	1	1	1	1	1	1	1	1	1	1	1	0.99	1	1	1	1	1	1	1	1	1	1	1	1	1	1	1	1	1	1	1	1	1	1	1	1	0.99	0.99	1
ERR025351_ST1	ST1		0.73	1	1	1	1	1	0.29	0.43	0	0.15	0.68	0.59	0.74	0.3	0.38	0	0	0.1	0	0	0	0	0	0	0	0.15	0	1	1	1	1	1	1	1	1	1	1	1	1	0.59	0.15	0.19	0.44	0	0	0	0
ERR025352_ST1	ST1		0.73	1	1	1	1	1	0.29	0.43	0	0.15	0.68	0.59	0.74	0.3	0.38	0	0	0.1	0	0	0	0	0	0	0	0.15	0	1	1	1	1	1	1	1	1	1	1	1	1	0.59	0.15	0.19	0.44	0	0	0	0
ERR025353_ST1	ST1		0.73	1	1	1	1	1	0.29	0.43	0	0.15	0.68	0.59	0.74	0.3	0.38	0	0	0.1	0	0	0	0	0	0	0	0.15	0	1	1	1	1	1	1	1	1	1	1	1	1	0.59	0.15	0.19	0.44	0	0	0	0
ERR025354_ST1	ST1		0.73	1	1	1	1	1	0.29	0.43	0	0.15	0.68	0.59	0.74	0.3	0.38	0	0	0.1	0	0	0	0	0	0	0	0.15	0	1	1	1	1	1	1	1	1	1	1	1	1	0.59	0.15	0.19	0.44	0	0	0	0
ERR026352_ST1	ST1		0.73	1	1	1	1	0.35	0.27	0	0	0.15	0.68	0.59	0.74	0.3	0.38	0	0	0.1	0	0	0	0	0	0	0	0.15	0	0	0.08	0	0	0.12	0.21	0.31	0.3	0.23	0.29	0.34	0	0	0.15	0.19	0.1	0	0	0	0
ERR026353_ST1	ST1		0.73	1	1	1	1	0.6	0.31	0.43	0	0.26	0.88	0.87	0.95	0.3	0.38	0.44	0	0.1	0	0	0.06	0	0	0.42	0	0.15	0	1	1	1	1	1	1	1	1	1	1	1	1	0.59	0.15	0.19	0.45	0.2	0	0	0
ERR026354_ST1	ST1		0.73	1	1	1	1	1	0.29	0.43	0	0.15	0.68	0.59	0.74	0.3	0.38	0	0	0.1	0	0	0	0	0	0	0	0.15	0	1	1	1	1	1	1	1	1	1	1	1	1	0.59	0.15	0.19	0.44	0	0	0	0
ERR026355_ST1	ST1		0.73	1	1	1	1	1	0.29	0.43	0	0.15	0.68	0.59	0.74	0.3	0.38	0	0	0.1	0	0	0	0	0	0	0	0.15	0	1	1	1	1	1	1	1	1	1	1	1	1	0.59	0.15	0.19	0.44	0	0	0	0
ERR026356_ST1	ST1		0.73	1	1	1	1	1	0.29	0.43	0	0.15	0.68	0.59	0.74	0.3	0.38	0	0	0.1	0	0	0	0	0	0	0	0.15	0	1	1	1	1	1	1	1	1	1	1	1	1	0.59	0.15	0.19	0.44	0	0	0	0
ERR026357_ST1	ST1		0.73	1	1	1	1	1	0.29	0.46	0	0.27	0.68	0.59	0.74	0.3	0.38	0	0.11	0.1	0	0.23	0.35	0	0	0.44	0.12	0.3	0	1	1	1	1	1	1	1	1	1	1	1	1	0.59	0.15	0.19	0.44	0.17	0.23	0	0.26
ERR026358_ST1	ST1		0.73	1	1	1	1	1	0.29	0.43	0	0.15	0.68	0.59	0.74	0.3	0.38	0	0	0.1	0	0	0	0	0	0	0	0.15	0	1	1	1	1	1	1	1	1	1	1	1	1	0.59	0.15	0.19	0.44	0	0	0	0
ERR026359_ST1	ST1		0.73	1	1	1	1	1	0.29	0.43	0	0.15	0.68	0.59	0.74	0.3	0.38	0	0	0.1	0	0	0	0	0	0	0	0.15	0	1	1	1	1	1	1	1	1	1	1	1	1	0.59	0.15	0.19	0.44	0	0	0	0
ERR026360_ST1	ST1		0.73	1	1	1	1	1	0.29	0.43	0	0.15	0.68	0.59	0.74	0.3	0.38	0	0	0.1	0	0	0	0	0	0	0	0.15	0	1	1	1	1	1	1	1	1	1	1	1	1	0.59	0.15	0.19	0.44	0	0	0	0
ERR026361_ST1	ST1		0.73	1	1	1	1	1	0.29	0.43	0	0.15	0.68	0.59	0.74	0.3	0.38	0	0	0.1	0	0	0	0	0	0	0	0.15	0	1	1	1	1	1	1	1	1	1	1	1	1	0.59	0.15	0.19	0.44	0	0	0	0
ERR026362_ST1	ST1		0.73	1	1	1	1	1	0.29	0.43	0	0.15	0.68	0.59	0.74	0.3	0.38	0	0	0.1	0	0	0	0	0	0	0	0.15	0	1	1	1	1	1	1	1	1	1	1	1	1	0.59	0.15	0.19	0.44	0	0	0	0
ERR026363_ST1	ST1		0.73	1	1	1	1	1	0.29	0.43	0	0.15	0.68	0.59	0.74	0.3	0.38	0	0	0.1	0	0	0	0	0	0	0	0.15	0	1	1	1	1	1	1	1	1	1	1	1	1	0.59	0.15	0.19	0.44	0	0	0	0
ERR026365_ST1	ST1		0.73	1	1	1	1	1	0.29	0.43	0	0.15	0.68	0.59	0.74	0.3	0.38	0	0	0.1	0	0	0	0	0	0	0	0.15	0	1	1	1	1	1	1	1	1	1	1	1	1	0.59	0.15	0.19	0.44	0	0	0	0
ERR026366_ST1	ST1		0.73	1	1	1	1	1	0.29	0.43	0	0.15	0.68	0.59	0.74	0.3	0.38	0	0	0.1	0	0	0	0	0	0	0	0.15	0	1	1	1	1	1	1	1	1	1	1	1	1	0.59	0.15	0.19	0.44	0	0	0	0
ERR026367_ST1	ST1		0.73	1	1	1	1	1	0.29	0.43	0	0.15	0.68	0.59	0.74	0.3	0.38	0	0	0.1	0	0	0	0	0	0	0	0.15	0	1	1	1	1	1	1	1	1	1	1	1	1	0.59	0.15	0.19	0.44	0	0	0	0
ERR026368_ST1	ST1		0.73	1	1	1	1	1	0.29	0.43	0	0.15	0.68	0.59	0.74	0.3	0.38	0	0	0.1	0	0	0	0	0	0	0	0.15	0	1	1	1	1	1	1	1	1	1	1	1	1	0.59	0.15	0.19	0.44	0	0	0	0
ERR026369_ST1	ST1		0.73	1	1	1	1	1	0.29	0.43	0	0.15	0.68	0.59	0.74	0.3	0.38	0	0	0.1	0	0	0	0	0	0	0	0.15	0	1	1	1	1	1	1	1	1	1	1	1	1	0.59	0.15	0.19	0.44	0	0	0	0
ERR026370_ST1	ST1		0.73	1	1	1	1	1	0.29	0.43	0	0.15	0.68	0.59	0.74	0.3	0.38	0	0	0.1	0	0	0	0	0	0	0	0.15	0	1	1	1	1	1	1	1	1	1	1	1	1	0.59	0.15	0.19	0.44	0	0	0	0
ERR026371_ST1	ST1		0.73	1	1	1	1	1	0.29	0.43	0	0.15	0.68	0.59	0.74	0.3	0.38	0	0	0.1	0	0	0	0	0	0	0	0.15	0	1	1	1	1	1	1	1	1	1	1	1	1	0.59	0.15	0.19	0.44	0	0	0	0
ERR026372_ST1	ST1		0.73	1	1	1	1	1	0.29	0.43	0	0.15	0.68	0.59	0.74	0.3	0.38	0	0	0.1	0	0	0	0	0	0	0	0.15	0	1	1	1	1	1	1	1	1	1	1	1	1	0.59	0.15	0.19	0.44	0	0	0	0
ERR026373_ST1	ST1		0.73	1	1	1	1	1	0.29	0.43	0	0.15	0.68	0.59	0.74	0.3	0.38	0	0	0.1	0	0	0	0	0	0	0	0.15	0	1	1	1	1	1	1	1	1	1	1	1	1	0.59	0.15	0.19	0.44	0	0	0	0
ERR026374_ST1	ST1		0.73	1	1	1	1	1	0.32	0.43	0	0.24	0.68	0.59	0.74	0.3	0.38	0	0	0.28	0.3	0	0.06	0	0	0.68	0.16	0.52	0	1	1	1	1	1	1	1	1	1	1	1	1	0.59	0.22	0.19	0.44	0.36	0	0.31	0
ERR026375_ST1	ST1		0.73	1	1	1	1	1	0.29	0.43	0	0.15	0.68	0.59	0.74	0.3	0.38	0	0	0.1	0	0.18	0	0	0	0	0	0.15	0	1	1	1	1	1	1	1	1	1	1	1	1	0.59	0.15	0.19	0.44	0	0	0	0
ERR026376_ST1	ST1		0.73	1	1	1	1	1	0.29	0.43	0	0.15	0.68	0.59	0.74	0.3	0.38	0	0	0.1	0	0	0	0	0	0	0	0.15	0	1	1	1	1	1	1	1	1	1	1	1	1	0.59	0.15	0.19	0.44	0	0	0	0
ERR026378_ST1	ST1		0.73	1	1	1	1	1	0.29	0.43	0	0.15	0.68	0.59	0.74	0.3	0.38	0	0	0.1	0	0	0	0	0	0	0	0.15	0	1	1	1	1	1	1	1	1	1	1	1	1	0.59	0.15	0.19	0.44	0	0	0	0
ERR026379_ST1	ST1		0.73	1	1	1	1	1	0.29	0.43	0	0.15	0.68	0.59	0.74	0.3	0.38	0	0	0.1	0	0	0	0	0	0	0	0.15	0	1	1	1	1	1	1	1	1	1	1	1	1	0.59	0.15	0.19	0.44	0	0	0	0
ERR026380_ST1	ST1		0.73	1	1	1	1	1	0.29	0.43	0	0.15	0.68	0.59	0.74	0.3	0.38	0	0	0.1	0	0	0	0	0	0	0	0.15	0	1	1	1	1	1	1	1	1	1	1	1	1	0.59	0.15	0.19	0.44	0	0	0	0
ERR026381_ST1	ST1		0.73	1	1	1	1	1	0.29	0.43	0	0.15	0.68	0.59	0.74	0.3	0.38	0	0	0.1	0	0	0	0	0	0	0	0.15	0	1	1	1	1	1	1	1	1	1	1	1	1	0.59	0.15	0.19	0.44	0	0	0	0
ERR026382_ST1	ST1		0.73	1	1	1	1	1	0.29	0.43	0	0.15	0.68	0.59	0.74	0.3	0.38	0	0	0.1	0	0	0	0	0	0	0	0.15	0	1	1	1	1	1	1	1	1	1	1	1	1	0.59	0.15	0.19	0.44	0	0	0	0
ERR026383_ST1	ST1		0.73	1	1	1	1	1	0.29	0.43	0	0.15	0.68	0.59	0.74	0.3	0.38	0	0	0.1	0	0	0	0	0	0	0	0.15	0	1	1	1	1	1	1	1	1	1	1	1	1	0.59	0.15	0.19	0.44	0	0	0	0
ERR026384_ST1	ST1		0.73	1	1	1	1	1	0.29	0.43	0	0.15	0.68	0.59	0.74	0.3	0.38	0	0	0.1	0	0	0	0	0	0	0	0.15	0	1	1	1	1	1	1	1	1	1	1	1	1	0.59	0.15	0.19	0.44	0	0	0	0
ERR026386_ST1	ST1		0.73	1	1	1	1	1	0.29	0.43	0	0.15	0.68	0.59	0.74	0.3	0.38	0	0	0.1	0	0	0	0	0	0	0	0.15	0	1	1	1	1	1	1	1	1	1	1	1	1	0.59	0.15	0.19	0.44	0	0	0	0
ERR026387_ST1	ST1		0.73	1	1	1	1	1	0.29	0.43	0	0.15	0.68	0.59	0.74	0.3	0.38	0	0	0.1	0	0	0	0	0	0	0	0.15	0	1	1	1	1	1	1	1	1	1	1	1	1	0.59	0.15	0.19	0.44	0	0	0	0
ERR026388_ST1	ST1		0.73	1	1	1	1	1	0.29	0.43	0	0.15	0.68	0.59	0.74	0.3	0.38	0	0	0.1	0	0	0	0	0	0	0	0.15	0	1	1	1	1	1	1	1	1	1	1	1	1	0.59	0.15	0.19	0.44	0	0	0	0
ERR026389_ST1	ST1		0.73	1	1	1	1	1	0.29	0.43	0	0.15	0.68	0.59	0.74	0.3	0.38	0	0	0.1	0	0	0	0	0	0	0	0.15	0	1	1	1	1	1	1	1	1	1	1	1	1	0.59	0.15	0.19	0.44	0	0	0	0
ERR026391_ST1	ST1		0.73	1	1	1	1	1	0.29	0.43	0	0.15	0.68	0.59	0.74	0.3	0.38	0	0	0.1	0	0	0	0	0	0	0	0.15	0	1	1	1	1	1	1	1	1	1	1	1	1	0.59	0.15	0.19	0.44	0	0	0	0
ERR026392_ST1	ST1		0.73	1	1	1	1	1	0.29	0.43	0	0.15	0.68	0.59	0.74	0.3	0.38	0	0	0.1	0	0	0	0	0	0	0	0.15	0	1	1	1	1	1	1	1	1	1	1	1	1	0.59	0.15	0.19	0.44	0	0	0	0
ERR026393_ST1	ST1		0.73	1	1	1	1	1	0.29	0.43	0	0.15	0.68	0.59	0.74	0.3	0.38	0	0	0.1	0	0	0	0	0	0	0	0.15	0	1	1	1	1	1	1	1	1	1	1	1	1	0.59	0.15	0.19	0.44	0	0	0	0
ERR026394_ST1	ST1		0.73	1	1	1	1	1	0.29	0.43	0	0.15	0.68	0.59	0.74	0.3	0.38	0	0	0.1	0	0	0.18	0	0	0	0	0.15	0	1	1	1	1	1	1	1	1	1	1	1	1	0.59	0.28	0.62	0.44	0	0.21	0	0.1
ERR026395_ST1	ST1		0.73	1	1	1	1	1	0.29	0.43	0	0.15	0.68	0.59	0.74	0.3	0.38	0	0	0.1	0	0	0	0	0	0	0	0.15	0	1	1	1	1	1	1	1	1	1	1	1	1	0.59	0.15	0.19	0.44	0	0	0	0
ERR026396_ST1	ST1		0.73	1	1	1	1	1	0.29	0.43	0	0.15	0.68	0.59	0.74	0.3	0.38	0	0	0.1	0	0	0	0	0	0	0	0.15	0	1	1	1	1	1	1	1	1	1	1	1	1	0.59	0.15	0.19	0.44	0	0	0	0
ERR026397_ST1	ST1		0.73	1	1	1	1	1	0.29	0.43	0	0.15	0.68	0.59	0.74	0.3	0.38	0	0	0.1	0	0	0	0	0	0	0	0.15	0	1	1	1	1	1	1	1	1	1	1	1	1	0.59	0.15	0.19	0.44	0	0	0	0
ERR026398_ST1	ST1		0.73	1	1	1	1	1	0.29	0.43	0	0.15	0.68	0.59	0.74	0.3	0.38	0	0	0.1	0	0	0	0	0	0	0	0.15	0	1	1	1	1	1	1	1	1	1	1	1	1	0.59	0.15	0.19	0.44	0	0	0	0
ERR026399_ST1	ST1		0.73	1	1	1	1	1	0.29	0.43	0	0.15	0.68	0.59	0.74	0.3	0.38	0	0	0.1	0	0	0	0	0	0	0	0.15	0	1	1	1	1	1	1	1	1	1	1	1	1	0.59	0.15	0.19	0.44	0	0	0	0
ERR026400_ST1	ST1		0.73	1	1	1	1	1	0.29	0.43	0	0.15	0.68	0.59	0.74	0.3	0.38	0	0	0.1	0	0	0	0	0	0	0	0.15	0	1	1	1	1	1	1	1	1	1	1	1	1	0.59	0.15	0.19	0.44	0	0	0	0
ERR026401_ST1	ST1		0.73	1	1	1	1	1	0.29	0.43	0	0.15	0.68	0.59	0.74	0.3	0.38	0	0	0.1	0	0	0	0	0	0	0	0.15	0	1	1	1	1	1	1	1	1	1	1	1	1	0.59	0.15	0.19	0.44	0	0	0	0
ERR026402_ST1	ST1		0.73	1	1	1	1	0.35	0.27	0	0	0.15	0.68	0.59	0.74	0.3	0.38	0	0	0.1	0	0	0	0	0	0	0	0.15	0	0	0.08	0	0	0.12	0.21	0.31	0.3	0.23	0.29	0.34	0	0	0.15	0.19	0.1	0	0	0	0
ERR026404_ST1	ST1		0.73	1	1	1	1	1	0.29	0.43	0	0.15	0.68	0.59	0.74	0.3	0.38	0	0	0.1	0	0	0	0	0	0	0	0.15	0	1	1	1	1	1	1	1	1	1	1	1	1	0.59	0.15	0.19	0.44	0	0	0	0
ERR026405_ST1	ST1		0.73	1	1	1	1	1	0.29	0.43	0	0.15	0.68	0.59	0.74	0.3	0.38	0	0	0.1	0	0	0	0	0	0	0	0.15	0	1	1	1	1	1	1	1	1	1	1	1	1	0.59	0.15	0.19	0.44	0	0	0	0
ERR026406_ST1	ST1		0.73	1	1	1	1	1	0.27	0	0	0.15	0.68	0.59	0.74	0.3	0.38	0	0	0.1	0	0	0	0	0	0	0	0.15	0	0	0.08	0	0	0.12	0.21	0.31	0.3	0.23	0.29	0.34	0	0	0.15	0.19	0.1	0	0	0	0
ERR026407_ST1	ST1		0.73	1	1	1	1	0.58	0.27	0	0	0.15	0.68	0.59	0.74	0.3	0.38	0	0	0.1	0	0	0	0	0	0	0	0.15	0	0	0.08	0	0	0.12	0.21	0.31	0.3	0.23	0.29	0.34	0	0	0.15	0.19	0.1	0	0	0	0
ERR026408_ST1	ST1		0.73	1	1	1	1	1	0.29	0.43	0	0.15	0.68	0.59	0.74	0.3	0.38	0	0	0.1	0	0	0	0	0	0	0	0.15	0	1	1	1	1	1	1	1	1	1	1	1	1	0.59	0.15	0.19	0.44	0	0	0	0
ERR026409_ST1	ST1		0.73	1	1	1	1	1	0.29	0.43	0	0.15	0.68	0.59	0.74	0.3	0.38	0	0	0.1	0	0	0	0	0	0	0	0.15	0	1	1	1	1	1	1	1	1	1	1	1	1	0.59	0.15	0.19	0.44	0	0	0	0
ERR026410_ST1	ST1		0.73	1	1	1	1	1	0.29	0.43	0	0.15	0.68	0.59	0.74	0.3	0.38	0	0	0.1	0	0	0	0	0	0	0	0.15	0	1	1	1	1	1	1	1	1	1	1	1	1	0.59	0.15	0.19	0.44	0	0	0	0
ERR026411_ST1	ST1		0.73	1	1	1	1	1	0.29	0.43	0	0.15	0.68	0.59	0.74	0.3	0.38	0	0	0.1	0	0	0	0	0	0	0	0.15	0	1	1	1	1	1	1	1	1	1	1	1	1	0.59	0.15	0.19	0.44	0	0	0	0
ERR026412_ST1	ST1		0.73	1	1	1	1	1	0.29	0.43	0	0.15	0.68	0.59	0.74	0.3	0.38	0	0	0.1	0	0	0	0	0	0	0	0.15	0	1	1	1	1	1	1	1	1	1	1	1	1	0.59	0.15	0.19	0.44	0	0	0	0
ERR026413_ST1	ST1		0.73	1	1	1	1	1	0.29	0.43	0	0.15	0.68	0.59	0.74	0.3	0.38	0	0	0.1	0	0	0	0	0	0	0	0.15	0	1	1	1	1	1	1	1	1	1	1	1	1	0.59	0.15	0.19	0.44	0	0	0	0
ERR026414_ST1	ST1		0.73	1	1	1	1	1	0.29	0.43	0	0.15	0.68	0.59	0.74	0.3	0.38	0	0	0.1	0	0	0	0	0	0	0	0.15	0	1	1	1	1	1	1	1	1	1	1	1	1	0.59	0.15	0.19	0.44	0	0	0	0
ERR026415_ST1	ST1		0.73	1	1	1	1	1	0.29	0.43	0	0.15	0.68	0.59	0.74	0.3	0.38	0	0	0.1	0	0	0	0	0	0	0	0.15	0	1	1	1	1	1	1	1	1	1	1	1	1	0.59	0.15	0.19	0.44	0	0	0	0
ERR026417_ST1	ST1		0.73	1	1	1	1	1	0.29	0.43	0	0.15	0.68	0.59	0.74	0.3	0.38	0	0	0.1	0	0	0	0	0	0	0	0.15	0	1	1	1	1	1	1	1	1	1	1	1	1	0.59	0.15	0.19	0.44	0	0	0	0
ERR026418_ST1	ST1		0.73	1	1	1	1	1	0.29	0.43	0	0.15	0.68	0.59	0.74	0.3	0.38	0	0	0.1	0	0	0	0	0	0	0.13	0.3	0	1	1	1	1	0.99	1	1	1	1	1	1	1	0.59	0.15	0.19	0.44	0.18	0	0	0
ERR026419_ST1	ST1		0.73	1	1	1	1	1	0.29	0.43	0	0.15	0.68	0.59	0.74	0.3	0.38	0	0	0.1	0	0	0	0	0	0	0	0.15	0	1	1	1	1	1	1	1	1	1	1	1	1	0.59	0.15	0.19	0.44	0	0	0	0
ERR026422_ST1	ST1		0.73	1	1	1	1	1	0.29	0.43	0	0.15	0.68	0.59	0.74	0.3	0.38	0	0	0.1	0	0	0	0	0	0	0	0.15	0	1	1	1	1	1	1	1	1	1	1	1	1	0.59	0.15	0.19	0.44	0	0	0	0
ERR026423_ST1	ST1		0.73	1	1	1	1	1	0.29	0.43	0	0.15	0.68	0.59	0.74	0.3	0.38	0	0	0.1	0	0	0	0	0	0	0	0.15	0	1	1	1	1	1	1	1	1	1	1	1	1	0.59	0.15	0.19	0.44	0	0	0	0
ERR026424_ST1	ST1		0.73	1	1	1	1	1	0.29	0.43	0	0.15	0.68	0.59	0.74	0.3	0.38	0	0	0.1	0	0	0.33	0	0	0	0	0.15	0	1	1	1	1	1	1	1	1	1	1	1	1	1	1	1	1	1	0.99	0.99	1
ERR026426_ST1	ST1		0.73	1	1	1	1	1	0.29	0.43	0	0.15	0.68	0.59	0.74	0.3	0.38	0	0	0.1	0	0	0	0	0	0	0	0.15	0	1	1	1	1	1	1	1	1	1	1	1	1	0.59	0.15	0.19	0.44	0	0	0	0
ERR026830_ST1	ST1		0.73	1	1	1	1	1	0.29	0.43	0	0.15	0.68	0.59	0.74	0.3	0.38	0	0	0.1	0	0	0.33	0	0	0	0	0.15	0	1	1	0.99	1	1	1	1	1	1	1	1	1	1	1	1	1	1	0.99	0.99	1
ERR026831_ST1	ST1		0.73	1	1	1	1	1	0.29	0.43	0	0.15	0.68	0.59	0.74	0.3	0.38	0	0	0.1	0	0	0	0	0	0	0	0.15	0	1	1	1	1	1	1	1	1	1	1	1	1	0.59	0.15	0.19	0.44	0	0	0	0
ERR026832_ST1	ST1		0.73	1	1	1	1	1	0.29	0.43	0	0.15	0.68	0.59	0.74	0.3	0.38	0	0	0.1	0	0	0	0	0	0	0	0.15	0	1	1	1	1	1	1	1	1	1	1	1	1	0.59	0.15	0.19	0.44	0	0	0	0
ERR026833_ST1	ST1		0.73	1	1	1	1	1	0.29	0.43	0	0.15	0.68	0.59	0.74	0.3	0.38	0	0	0.1	0	0	0	0	0	0	0	0.15	0	1	1	1	1	1	1	1	1	1	1	1	1	0.59	0.15	0.19	0.44	0	0	0	0
ERR026834_ST1	ST1		0.73	1	1	1	1	1	0.29	0.43	0	0.15	0.68	0.59	0.74	0.3	0.38	0	0	0.1	0	0	0	0	0	0	0	0.15	0	1	1	1	1	1	1	1	1	1	1	1	1	0.59	0.15	0.19	0.44	0	0	0	0
ERR026835_ST1	ST1		0.73	1	1	1	1	1	0.29	0.43	0	0.15	0.68	0.59	0.74	0.3	0.38	0	0	0.1	0	0	0	0	0	0	0	0.15	0	1	1	1	1	1	1	1	1	1	1	1	1	0.59	0.15	0.19	0.44	0	0	0	0
ERR026836_ST1	ST1		0.73	1	1	1	1	1	0.29	0.43	0	0.15	0.68	0.59	0.74	0.3	0.38	0	0	0.1	0	0	0	0	0	0	0	0.15	0	1	1	1	1	1	1	1	1	1	1	1	1	0.59	0.15	0.19	0.44	0	0	0	0
ERR026837_ST1	ST1		0.73	1	1	1	1	1	0.29	0.43	0	0.15	0.68	0.59	0.74	0.3	0.38	0	0	0.1	0	0	0.33	0	0	0	0	0.15	0	1	1	0.99	1	1	1	1	1	1	1	1	1	1	1	1	1	1	0.99	0.99	1
ERR026838_ST1	ST1		0.73	1	1	1	1	1	0.29	0.43	0	0.15	0.68	0.59	0.74	0.3	0.38	0	0	0.1	0	0	0.33	0	0	0	0	0.15	0	1	1	0.99	1	1	1	1	1	1	1	1	1	1	1	1	1	1	0.99	0.99	1
ERR026839_ST1	ST1		0.73	1	1	1	1	1	0.29	0.43	0	0.15	0.68	0.59	0.74	0.3	0.38	0	0	0.1	0	0	0	0	0	0	0	0.15	0	1	1	1	1	1	1	1	1	1	1	1	1	0.59	0.15	0.19	0.44	0	0	0	0
ERR026840_ST1	ST1		0.73	1	1	1	1	1	0.29	0.43	0	0.15	0.68	0.59	0.74	0.3	0.38	0	0	0.1	0	0	0	0	0	0	0	0.15	0	1	1	1	1	1	1	1	1	1	1	1	1	0.59	0.15	0.19	0.44	0	0	0	0
ERR026841_ST1	ST1		0.73	1	1	1	1	1	0.27	0	0	0.15	0.68	0.59	0.74	0.3	0.38	0	0	0.1	0	0	0	0	0	0	0	0.15	0	0	0.08	0	0	0.12	0.21	0.31	0.3	0.23	0.29	0.34	0	0	0.15	0.19	0.1	0	0	0	0
ERR026843_ST1	ST1		0.73	1	1	1	1	1	0.29	0.43	0	0.25	0.68	0.59	0.74	0.3	0.38	0	0	0.1	0	0	0	0	0	0	0	0.15	0	1	1	1	1	1	1	1	1	1	1	1	1	0.59	0.15	0.19	0.44	0	0	0	0
ERR026844_ST1	ST1		0.73	1	1	1	1	1	0.29	0.43	0	0.15	0.68	0.59	0.74	0.3	0.38	0	0	0.1	0	0	0	0	0	0	0	0.15	0	1	1	1	1	1	1	1	1	1	1	1	1	0.59	0.15	0.19	0.44	0	0	0	0
ERR026845_ST1	ST1		0.73	1	1	1	1	1	0.29	0.43	0	0.15	0.68	0.59	0.74	0.3	0.38	0	0	0.1	0	0	0	0	0	0	0	0.15	0	1	1	1	1	1	1	1	1	1	1	1	1	0.59	0.15	0.19	0.44	0	0	0	0
ERR026847_ST1	ST1		0.73	1	1	1	1	1	0.29	0.43	0	0.15	0.68	0.59	0.74	0.3	0.38	0	0	0.1	0	0	0	0	0	0	0	0.15	0	1	1	1	1	1	1	1	1	1	1	1	1	0.59	0.15	0.19	0.44	0	0	0	0
ERR026849_ST1	ST1		0.73	1	1	1	1	1	0.29	0.43	0	0.15	0.68	0.59	0.74	0.3	0.38	0	0	0.1	0	0	0	0	0	0	0	0.15	0	1	1	1	1	1	1	1	1	1	1	1	1	0.59	0.15	0.19	0.44	0	0	0	0
ERR026850_ST1	ST1		0.73	1	1	1	1	1	0.29	0.43	0	0.15	0.68	0.59	0.74	0.3	0.38	0	0	0.1	0	0	0	0	0	0	0	0.15	0	1	1	1	1	1	1	1	1	1	1	1	1	0.59	0.15	0.19	0.44	0	0	0	0
ERR026852_ST1	ST1		0.73	1	1	1	1	1	1	1	1	1	1	1	1	1	1	1	1	1	1	0.99	1	1	1	1	1	1	1	1	1	1	1	1	1	1	1	1	1	1	1	1	1	1	1	1	0.99	0.99	1
ERR026856_ST1	ST1		0.73	1	1	1	1	1	0.29	0.43	0	0.15	0.68	0.59	0.74	0.3	0.38	0	0	0.1	0	0	0.33	0	0	0	0	0.15	0	1	1	0.99	1	1	1	1	1	1	1	1	1	1	1	1	1	1	0.99	0.99	1
ERR026857_ST1	ST1		0.73	1	1	1	1	1	0.29	0.43	0	0.15	0.68	0.59	0.74	0.3	0.38	0	0	0.1	0	0	0	0	0	0	0	0.15	0	1	1	1	1	1	1	1	1	1	1	1	1	0.59	0.15	0.19	0.44	0	0	0	0
ERR026858_ST1	ST1		0.73	1	1	1	1	1	0.29	0.43	0	0.15	0.68	0.59	0.74	0.3	0.38	0	0	0.1	0	0	0	0	0	0	0	0.15	0	1	1	1	1	1	1	1	1	1	1	1	1	0.59	0.15	0.19	0.44	0	0	0	0
ERR026859_ST1	ST1		0.73	1	1	1	1	1	0.29	0.43	0	0.15	0.68	0.59	0.74	0.3	0.38	0	0	0.1	0	0	0	0	0	0	0	0.15	0	1	1	1	1	1	1	1	1	1	1	1	1	0.59	0.15	0.19	0.44	0	0	0	0
ERR026861_ST1	ST1		0.73	1	1	1	1	1	0.29	0.43	0	0.15	0.68	0.59	0.74	0.3	0.38	0	0	0.1	0	0	0.33	0	0	0	0	0.15	0	1	1	0.99	1	1	1	1	1	1	1	1	1	1	1	1	1	1	0.99	0.99	1
ERR026862_ST1	ST1		0.73	1	1	1	1	1	0.29	0.43	0	0.15	0.68	0.59	0.74	0.3	0.38	0	0	0.1	0	0	0.33	0	0	0	0	0.15	0	1	1	0.99	1	1	1	1	1	1	1	1	1	1	1	1	1	1	0.99	0.99	1
ERR026863_ST1	ST1		0.73	1	1	1	1	1	0.29	0.43	0	0.15	0.68	0.59	0.74	0.3	0.38	0	0	0.1	0	0	0	0	0	0	0	0.15	0	1	1	1	1	1	1	1	1	1	1	1	1	0.59	0.15	0.19	0.44	0	0	0	0
ERR026864_ST1	ST1		0.73	1	1	1	1	1	0.29	0.43	0	0.15	0.68	0.59	0.74	0.3	0.38	0	0	0.1	0	0	0	0	0	0	0	0.15	0	1	1	1	1	1	1	1	1	1	1	1	1	0.59	0.15	0.19	0.44	0	0	0	0
ERR026865_ST1	ST1		0.73	1	1	1	1	1	0.29	0.43	0	0.15	0.68	0.59	0.74	0.3	0.38	0	0	0.1	0	0	0	0	0	0	0	0.15	0	1	1	1	1	1	1	1	1	1	1	1	1	0.59	0.15	0.19	0.44	0	0	0	0
ERR026866_ST1	ST1		0.73	1	1	1	1	1	0.29	0.43	0	0.15	0.68	0.59	0.74	0.3	0.38	0	0	0.1	0	0	0	0	0	0	0	0.15	0	1	1	1	1	1	1	1	1	1	1	1	1	0.59	0.15	0.19	0.44	0	0	0	0
ERR026867_ST1	ST1		0.73	1	1	1	1	1	0.29	0.43	0	0.15	0.68	0.59	0.74	0.3	0.38	0	0	0.1	0	0	0	0	0	0	0	0.15	0	1	1	1	1	1	1	1	1	1	1	1	1	0.59	0.15	0.19	0.44	0	0	0	0
ERR026869_ST1	ST1		0.73	1	1	1	1	1	0.29	0.43	0	0.15	0.68	0.59	0.74	0.3	0.38	0	0	0.1	0	0	0	0	0	0	0	0.15	0	1	1	1	1	1	1	1	1	1	1	1	1	0.59	0.15	0.19	0.44	0	0	0	0
ERR026870_ST1	ST1		0.73	1	1	1	1	1	0.29	0.43	0	0.15	0.68	0.59	0.74	0.3	0.38	0	0	0.1	0	0	0.33	0	0	0	0	0.15	0	1	1	0.99	1	1	1	1	1	1	1	1	1	1	1	1	1	1	0.99	0.99	1
ERR026871_ST1	ST1		0.73	1	1	1	1	1	0.29	0.43	0	0.15	0.68	0.59	0.74	0.3	0.38	0	0	0.1	0	0	0.33	0	0	0	0	0.15	0	1	1	0.99	1	1	1	1	1	1	1	1	1	1	1	1	1	1	0.99	0.99	1
ERR026872_ST1	ST1		0.73	1	1	1	1	1	0.29	0.43	0	0.15	0.68	0.59	0.74	0.3	0.38	0	0	0.1	0	0	0.33	0	0	0	0	0.15	0	1	1	0.99	1	1	1	1	1	1	1	1	1	1	1	1	1	1	0.99	0.99	1
ERR026873_ST1	ST1		0.73	1	1	1	1	1	0.29	0.43	0	0.15	0.68	0.59	0.74	0.3	0.38	0	0	0.1	0	0	0	0	0	0	0	0.15	0	1	1	1	1	1	1	1	1	1	1	1	1	0.59	0.15	0.19	0.44	0	0	0	0
ERR026874_ST1	ST1		0.73	1	1	1	1	1	0.29	0.43	0	0.15	0.68	0.59	0.74	0.3	0.38	0	0	0.1	0	0	0	0	0	0	0	0.15	0	1	1	1	1	1	1	1	1	1	1	1	1	0.59	0.15	0.19	0.44	0	0	0	0
ERR026875_ST1	ST1		0.73	1	1	1	1	1	0.29	0.43	0	0.15	0.68	0.59	0.74	0.3	0.38	0	0	0.1	0	0	0.33	0	0	0	0	0.15	0	1	1	0.99	1	1	1	1	1	1	1	1	1	1	1	1	1	1	0.99	0.99	1
ERR026876_ST1	ST1		0.73	1	1	1	1	1	1	1	1	1	1	1	1	1	1	1	1	1	1	0.99	1	1	1	1	1	1	1	1	1	1	1	1	1	1	1	1	1	1	1	1	1	1	1	1	0.99	0.99	1
ERR026877_ST1	ST1		0.73	1	1	1	1	1	0.29	0.43	0	0.15	0.68	0.59	0.74	0.3	0.38	0	0	0.1	0	0	0.33	0	0	0	0	0.15	0	1	1	0.99	1	1	1	1	1	1	1	1	1	1	1	1	1	1	0.99	0.99	1
ERR026878_ST1	ST1		0.73	1	1	1	1	1	0.29	0.43	0	0.15	0.68	0.59	0.74	0.3	0.38	0	0	0.1	0	0	0.33	0	0	0	0	0.15	0	1	0.86	0.83	1	1	0.91	1	1	1	1	1	1	1	1	1	1	1	0.99	0.99	1
ERR026879_ST1	ST1		0.73	1	1	1	1	1	0.29	0.43	0	0.15	0.68	0.59	0.74	0.3	0.38	0	0	0.1	0	0	0.33	0	0	0	0	0.15	0	1	1	0.99	1	1	1	1	1	1	1	1	1	1	1	1	1	1	0.99	0.99	1
ERR026880_ST1	ST1		0.73	1	1	1	1	1	0.29	0.43	0	0.15	0.68	0.59	0.74	0.3	0.38	0	0	0.1	0	0	0	0	0	0	0	0.15	0	1	1	1	1	1	1	1	1	1	1	1	1	0.59	0.15	0.19	0.44	0	0	0	0
ERR027376_ST1	ST1		0.73	1	1	1	1	1	0.29	0.43	0	0.15	0.68	0.59	0.74	0.3	0.38	0	0	0.1	0	0	0	0	0	0	0	0.15	0	1	1	1	1	1	1	1	1	1	1	1	1	0.59	0.15	0.19	0.44	0	0	0	0
ERR027377_ST1	ST1		0.73	1	1	1	1	1	0.29	0.43	0	0.15	0.68	0.59	0.74	0.3	0.38	0	0	0.1	0	0	0	0	0	0	0	0.15	0	1	1	1	1	1	1	1	1	1	1	1	1	0.59	0.15	0.19	0.44	0	0	0	0
ERR027385_ST1	ST1		0.73	1	1	1	1	1	1	1	1	1	1	1	1	1	1	1	1	1	1	0.99	1	1	1	1	1	1	1	1	1	1	1	1	1	1	1	1	1	1	1	1	1	1	1	1	0.99	0.99	1
ERR027386_ST1	ST1		0.73	1	1	1	1	1	1	1	1	1	1	1	1	1	1	1	1	1	1	0.99	1	1	1	1	1	1	1	1	1	1	1	1	1	1	1	1	1	1	1	1	1	1	1	1	0.99	0.99	1
ERR028721_ST1	ST1		0.73	1	1	1	1	1	0.29	0.43	0	0.15	0.68	0.59	0.74	0.3	0.38	0	0	0.1	0	0	0	0	0	0	0	0.15	0	1	1	1	1	1	1	1	1	1	1	1	1	0.59	0.15	0.19	0.44	0	0	0	0
ERR028722_ST1	ST1		0.73	1	1	1	1	1	0.29	0.43	0	0.15	0.68	0.59	0.74	0.3	0.38	0	0	0.1	0	0	0	0	0	0	0	0.15	0	1	1	1	1	1	1	1	1	1	1	1	1	0.59	0.15	0.19	0.44	0	0	0	0
ERR028723_ST1	ST1		0.73	1	1	1	1	0.35	0.27	0	0	0.15	0.68	0.59	0.74	0.3	0.38	0	0	0.1	0	0	0	0	0	0	0	0.15	0	0	0.08	0	0	0.12	0.21	0.31	0.3	0.23	0.29	0.34	0	0	0.15	0.19	0.1	0	0	0	0
ERR028724_ST1	ST1		0.73	1	1	1	1	1	0.29	0.43	0	0.15	0.68	0.59	0.74	0.3	0.38	0	0	0.1	0	0	0	0	0	0	0	0.15	0	1	1	1	1	1	1	1	1	1	1	1	1	0.59	0.15	0.19	0.44	0	0	0	0
ERR028725_ST1	ST1		0.73	1	1	1	1	1	0.29	0.43	0	0.15	0.68	0.59	0.74	0.3	0.38	0	0	0.1	0	0	0	0	0	0	0	0.15	0	1	1	1	1	1	1	1	1	1	1	1	1	0.59	0.15	0.19	0.44	0	0	0	0
ERR028726_ST1	ST1		0.73	1	1	1	1	1	0.29	0.43	0	0.15	0.68	0.59	0.74	0.3	0.38	0	0	0.1	0	0	0	0	0	0	0	0.15	0	1	1	1	1	1	1	1	1	1	1	1	1	0.59	0.15	0.19	0.44	0	0	0	0
ERR028727_ST1	ST1		0.73	1	1	1	1	1	0.29	0.43	0	0.15	0.68	0.59	0.74	0.3	0.38	0	0	0.1	0	0	0	0	0	0	0	0.15	0	1	1	1	1	1	1	1	1	1	1	1	1	0.59	0.15	0.19	0.44	0	0	0	0
ERR028728_ST1	ST1		0.73	1	1	1	1	1	0.29	0.43	0	0.15	0.68	0.59	0.74	0.3	0.38	0	0	0.1	0	0	0	0	0	0	0	0.15	0	1	1	1	1	1	1	1	1	1	1	1	1	0.59	0.15	0.19	0.44	0	0	0	0
ERR028729_ST1	ST1		0.73	1	1	1	1	1	0.29	0.43	0	0.15	0.68	0.59	0.74	0.3	0.38	0	0	0.1	0	0	0	0	0	0	0	0.15	0	1	1	1	1	1	1	1	1	1	1	1	1	0.59	0.15	0.19	0.44	0	0	0	0
ERR028730_ST1	ST1		0.73	1	1	1	1	1	0.29	0.43	0	0.15	0.68	0.59	0.74	0.3	0.38	0	0	0.1	0	0	0	0	0	0	0	0.15	0	1	1	1	1	1	1	1	1	1	1	1	1	0.59	0.15	0.19	0.44	0	0	0	0
ERR028731_ST1	ST1		0.73	1	1	1	1	1	0.29	0.43	0	0.15	0.68	0.59	0.74	0.3	0.38	0	0	0.1	0	0	0	0	0	0	0	0.15	0	1	1	1	1	1	1	1	1	1	1	1	1	0.59	0.15	0.19	0.44	0	0	0	0
ERR028732_ST1	ST1		0.73	1	1	1	1	1	0.29	0.43	0	0.15	0.68	0.59	0.74	0.3	0.38	0	0	0.1	0	0	0	0	0	0	0	0.15	0	1	1	1	1	1	1	1	1	1	1	1	1	0.59	0.15	0.19	0.44	0	0	0	0
ERR029481_ST1	ST1		0.73	1	1	1	1	1	0.29	0.43	0	0.15	0.68	0.59	0.74	0.3	0.38	0	0	0.1	0	0	0	0	0	0	0	0.15	0	1	1	1	1	1	1	1	1	1	1	1	1	0.59	0.15	0.19	0.44	0	0	0	0
ERR029482_ST1	ST1		0.73	1	1	1	1	1	0.29	0.43	0	0.15	0.68	0.59	0.74	0.3	0.38	0	0	0.1	0	0	0	0	0	0	0	0.15	0	1	1	1	1	1	1	1	1	1	1	1	1	0.59	0.15	0.19	0.44	0	0	0	0
ERR029483_ST1	ST1		0.73	1	1	1	1	1	0.29	0.43	0	0.15	0.68	0.59	0.74	0.3	0.38	0	0	0.1	0	0	0.33	0	0	0	0	0.15	0	1	1	1	1	1	1	1	1	1	1	1	1	1	1	1	1	1	0.99	0.99	1
ERR029484_ST1	ST1		0.73	1	1	1	1	1	0.27	0	0	0.15	0.68	0.59	0.74	0.3	0.38	0	0	0.1	0	0	0	0	0	0	0	0.15	0	0	0.08	0	0	0.12	0.21	0.31	0.3	0.23	0.29	0.34	0	0	0.15	0.19	0.1	0	0	0	0
ERR029485_ST1	ST1		0.73	1	1	1	1	1	0.29	0.43	0	0.15	0.68	0.59	0.74	0.3	0.38	0	0	0.1	0	0	0	0	0	0	0	0.15	0	1	1	1	1	1	1	1	1	1	1	1	1	0.59	0.15	0.19	0.44	0	0	0	0
ERR029486_ST1	ST1		0.73	1	1	1	1	1	1	1	1	1	1	1	1	1	1	1	1	1	1	0.99	1	1	1	1	1	1	1	1	1	1	1	1	1	1	1	1	1	1	1	1	1	1	1	1	0.99	0.99	1
ERR029487_ST1	ST1		0.73	1	1	1	1	1	0.29	0.43	0	0.15	0.68	0.59	0.74	0.3	0.38	0	0	0.1	0	0	0	0	0	0	0	0.15	0	1	1	1	1	1	1	1	1	1	1	1	1	0.59	0.15	0.19	0.44	0	0	0	0
ERR029488_ST1	ST1		0.73	1	1	1	1	1	0.29	0.43	0	0.15	0.68	0.59	0.74	0.3	0.38	0	0	0.1	0	0	0	0	0	0	0	0.15	0	1	1	1	1	1	1	1	1	1	1	1	1	0.59	0.15	0.19	0.44	0	0	0	0
ERR029489_ST1	ST1		0.73	1	1	1	1	1	0.29	0.43	0	0.15	0.68	0.59	0.74	0.3	0.38	0	0	0.1	0	0	0	0	0	0	0	0.15	0	1	1	1	1	1	1	1	1	1	1	1	1	0.59	0.15	0.19	0.44	0	0	0	0
ERR029490_ST1	ST1		0.73	1	1	1	1	1	0.29	0.43	0	0.15	0.68	0.59	0.74	0.3	0.38	0	0	0.1	0	0	0	0	0	0	0	0.15	0	1	1	1	1	1	1	1	1	1	1	1	1	0.59	0.15	0.19	0.44	0	0	0	0
ERR029491_ST1	ST1		0.73	1	1	1	1	1	0.29	0.43	0	0.15	0.68	0.59	0.74	0.3	0.38	0	0	0.1	0	0	0	0	0	0	0	0.15	0	1	1	1	1	1	1	1	1	1	1	1	1	0.59	0.15	0.19	0.44	0	0	0	0
ERR029492_ST1	ST1		0.73	1	1	1	1	1	0.29	0.43	0	0.15	0.68	0.59	0.74	0.3	0.38	0	0	0.1	0	0	0	0	0	0	0	0.15	0	1	1	1	1	1	1	1	1	1	1	1	1	0.59	0.15	0.19	0.44	0	0	0	0
ERR029494_ST1	ST1		0.73	1	1	1	1	1	0.29	0.43	0	0.15	0.68	0.59	0.74	0.3	0.38	0	0	0.1	0	0	0.33	0	0	0	0	0.15	0	1	1	1	1	1	1	1	1	1	1	1	1	1	1	1	1	1	0.99	0.99	1
ERR029495_ST1	ST1		0.73	1	1	1	1	1	0.29	0.43	0	0.15	0.68	0.59	0.74	0.3	0.38	0	0	0.1	0	0	0.33	0	0	0	0	0.15	0	1	1	1	1	1	1	1	1	1	1	1	1	1	1	1	1	1	0.99	0.99	1
ERR029496_ST1	ST1		0.73	1	1	1	1	1	0.29	0.43	0	0.15	0.68	0.59	0.74	0.3	0.38	0	0	0.1	0	0	0.33	0	0	0	0	0.15	0	1	1	1	1	1	1	1	1	1	1	1	1	1	1	1	1	1	0.99	0.99	1
ERR029497_ST1	ST1		0.73	1	1	1	1	1	0.29	0.43	0	0.15	0.68	0.59	0.74	0.3	0.38	0	0	0.1	0	0	0.33	0	0	0	0	0.15	0	1	1	1	1	1	1	1	1	1	1	1	1	1	1	1	1	1	0.99	0.99	1
ERR029498_ST1	ST1		0.73	1	1	1	1	1	0.29	0.43	0	0.15	0.68	0.59	0.74	0.3	0.38	0	0	0.1	0	0	0.33	0	0	0	0	0.15	0	1	1	0.99	1	1	1	1	1	1	1	1	1	1	1	1	1	1	0.99	0.99	1
ERR029499_ST1	ST1		0.73	1	1	1	1	1	0.29	0.43	0	0.15	0.68	0.59	0.74	0.3	0.38	0	0	0.1	0	0	0	0	0	0	0	0.15	0	1	1	0.99	1	1	1	1	1	1	1	1	1	0.59	0.15	0.19	0.44	0	0	0	0
ERR029500_ST1	ST1		0.73	1	1	1	1	1	0.29	0.43	0	0.15	0.68	0.59	0.74	0.3	0.38	0	0	0.1	0	0	0	0	0	0	0	0.15	0	1	1	1	1	1	1	1	1	1	1	1	1	0.59	0.15	0.19	0.44	0	0	0	0
ERR029501_ST1	ST1		0.73	1	1	1	1	1	0.29	0.43	0	0.15	0.68	0.59	0.74	0.3	0.38	0	0	0.1	0	0	0	0	0	0	0	0.15	0	1	1	1	1	1	1	1	1	1	1	1	1	0.59	0.15	0.19	0.44	0	0	0	0
ERR029502_ST1	ST1		0.73	1	1	1	1	1	1	1	1	1	1	1	1	1	1	1	1	1	1	0.99	1	1	1	1	1	1	1	1	1	1	1	1	1	1	1	1	1	1	1	1	1	1	1	1	0.99	0.99	1
ERR029503_ST1	ST1		0.73	1	1	1	1	1	0.29	0.43	0	0.15	0.68	0.59	0.74	0.3	0.38	0	0	0.1	0	0	0	0	0	0	0	0.15	0	1	1	1	1	1	1	1	1	1	1	1	1	0.59	0.15	0.19	0.44	0	0	0	0
ERR029504_ST1	ST1		0.73	1	1	1	1	1	0.29	0.43	0	0.15	0.68	0.59	0.74	0.3	0.38	0	0	0.1	0	0	0.33	0	0	0	0	0.15	0	1	1	1	1	1	1	1	1	1	1	1	1	1	1	1	1	1	0.99	0.99	1
ERR029505_ST1	ST1		0.73	1	1	1	1	1	0.29	0.43	0	0.15	0.68	0.59	0.74	0.3	0.38	0	0	0.1	0	0	0	0	0	0	0	0.15	0	1	1	1	1	1	1	1	1	1	1	1	1	0.59	0.15	0.19	0.44	0	0	0	0
ERR029507_ST1	ST1		0.73	1	1	1	1	1	0.27	0	0	0.25	0.68	0.59	0.74	0.3	0.38	0	0	0.1	0	0	0	0	0	0	0	0.15	0	0	0.08	0	0	0.12	0.21	0.31	0.3	0.32	0.29	0.34	1	0	0.15	0.19	0.1	0	0	0	0
ERR029508_ST1	ST1		0.73	1	1	1	1	0.35	0.27	0	0	0.15	0.68	0.59	0.74	0.3	0.38	0	0	0.1	0	0	0	0	0	0	0	0.15	0	0	0.08	0	0	0.12	0.21	0.31	0.3	0.23	0.29	0.34	0	0	0.15	0.19	0.1	0	0	0	0
ERR029509_ST1	ST1		0.73	1	1	1	1	1	0.29	0.43	0	0.15	0.68	0.59	0.74	0.3	0.38	0	0	0.1	0	0	0	0	0	0	0	0.15	0	1	1	1	1	1	1	1	1	1	1	1	1	0.59	0.15	0.19	0.44	0	0	0	0
ERR029510_ST1	ST1		0.73	1	1	1	1	0.06	0.1	0	0	0.15	0.68	0.59	0.74	0.3	0.38	0	0	0.1	0	0	0	0	0	0	0	0.15	0	0	0.08	0	0	0.12	0	0.15	0.12	0.23	0.29	0.34	0	0	0.15	0.19	0.1	0	0	0	0
ERR029511_ST1	ST1		0.73	1	1	1	1	1	0.12	0	0	0.25	0.68	0.59	0.74	0.3	0.38	0	0	0.1	0	0	0	0	0	0	0	0.15	0	0	0.08	0	0	0.12	0.21	0.16	0.14	0.32	0.29	0.34	1	0	0.15	0.19	0.1	0	0	0	0
ERR029512_ST1	ST1		0.73	1	1	1	1	1	0.27	0	0	0.25	0.68	0.59	0.74	0.3	0.38	0	0	0.1	0	0	0	0	0	0	0	0.15	0	0	0.08	0	0	0.12	0.21	0.31	0.3	0.39	0.29	0.34	1	0	0.15	0.19	0.1	0	0	0	0
ERR029513_ST1	ST1		0.73	1	1	1	1	1	0.29	0.43	0	0.15	0.68	0.59	0.74	0.3	0.38	0	0	0.1	0	0	0	0	0	0	0	0.15	0	1	1	1	1	1	1	1	1	1	1	1	1	0.59	0.15	0.19	0.44	0	0	0	0
ERR029514_ST1	ST1		0.73	1	1	1	1	1	0.27	0	0	0.25	0.96	0.98	0.99	1	1	0.98	0	0.29	0.31	0	0	0	0	0.2	0	0.15	0	0	0.08	0	0	0.12	0.21	0.31	0.3	0.32	0.29	0.34	1	0	0.15	0.19	0.1	0	0	0	0.04
ERR029515_ST1	ST1		0.73	1	1	1	1	0.06	0.11	0	0	0.15	0.68	0.59	0.74	0.3	0.38	0	0	0.1	0	0	0	0	0	0	0	0.15	0	0	0.08	0	0	0.12	0	0.15	0.13	0.23	0.29	0.34	0	0	0.15	0.19	0.1	0	0	0	0
ERR029516_ST1	ST1		0.73	1	1	1	1	1	0.29	0.43	0	0.15	0.68	0.59	0.74	0.3	0.38	0	0	0.1	0	0	0	0	0	0	0	0.15	0	1	1	1	1	1	1	1	1	1	1	1	1	0.59	0.15	0.19	0.44	0	0	0	0
ERR029517_ST1	ST1		0.73	1	1	1	1	1	0.64	0	0	0.25	0.68	0.59	0.74	0.3	0.38	0	0	0.1	0	0	0	0	0	0	0	0.15	0	0	0.08	0	0.52	0.44	0.55	0.31	0.31	0.32	0.29	0.34	1	0	0.15	0.19	0.1	0	0	0	0
ERR029518_ST1	ST1		0.73	1	1	1	1	1	0.64	0	0	0.25	0.68	0.59	0.74	0.3	0.38	0	0	0.1	0	0	0	0	0	0	0	0.15	0	0	0.08	0	0.52	0.44	0.55	0.31	0.31	0.32	0.29	0.34	1	0	0.15	0.19	0.1	0	0	0	0
ERR029520_ST1	ST1		0.73	1	1	1	1	0.06	0.08	0	0	0.15	0.68	0.59	0.74	0.3	0.38	0	0	0.1	0	0	0	0	0	0	0	0.15	0	0	0.08	0	0	0.12	0	0.11	0.09	0.23	0.29	0.34	0	0	0.15	0.19	0.1	0	0	0	0
ERR029523_ST1	ST1		0.73	1	1	1	1	1	0.29	0.43	0	0.15	0.68	0.59	0.74	0.3	0.38	0	0	0.1	0	0	0	0	0	0	0	0.15	0	1	1	1	1	1	1	1	1	1	1	1	1	0.59	0.15	0.19	0.44	0	0	0	0
ERR029524_ST1	ST1		0.73	1	1	1	1	0.06	0.1	0	0	0.15	0.68	0.59	0.74	0.3	0.38	0	0	0.1	0	0	0	0	0	0	0	0.15	0	0	0.08	0	0	0.12	0	0.15	0.12	0.23	0.29	0.34	0	0	0.15	0.19	0.1	0	0	0	0
ERR029525_ST1	ST1		0.73	1	1	1	1	0.06	0.27	0	0	0.15	0.68	0.59	0.74	0.3	0.38	0	0	0.1	0	0	0	0	0	0	0	0.15	0	0	0.08	0	0	0.12	0	0.31	0.3	0.23	0.29	0.34	0	0	0.15	0.19	0.1	0	0	0	0
ERR029526_ST1	ST1		0.73	1	1	1	1	0.06	0.15	0	0	0.15	0.68	0.59	0.74	0.3	0.38	0	0	0.1	0	0	0	0	0	0	0	0.15	0	0	0.08	0	0	0.12	0	0.21	0.19	0.23	0.29	0.34	0	0	0.15	0.19	0.1	0	0	0	0
ERR029527_ST1	ST1		0.73	1	1	1	1	0.35	0.27	0	0	0.15	0.68	0.59	0.74	0.3	0.38	0	0	0.1	0	0.18	0	0	0	0	0	0.15	0	0	0.08	0	0	0.12	0.21	0.31	0.3	0.23	0.29	0.34	0	0	0.15	0.19	0.1	0	0	0	0
ERR029528_ST1	ST1		0.73	1	1	1	1	0.98	0.27	0	0	0.15	0.68	0.59	0.74	0.3	0.38	0	0	0.1	0	0.18	0	0	0	0	0	0.15	0	0	0.08	0	0	0.12	0.21	0.31	0.3	0.35	0.29	0.34	0	0	0.15	0.19	0.1	0	0	0	0
ERR029529_ST1	ST1		0.73	1	1	1	1	0.35	0.27	0	0	0.15	0.68	0.59	0.74	0.3	0.38	0	0	0.1	0	0	0	0	0	0	0	0.15	0	0	0.08	0	0	0.12	0.21	0.31	0.3	0.23	0.29	0.34	0	0	0.15	0.19	0.1	0	0	0	0
ERR029531_ST1	ST1		0.73	1	1	1	1	1	0.29	0.43	0	0.15	0.68	0.59	0.74	0.3	0.38	0	0	0.1	0	0	0	0	0	0	0	0.15	0	1	1	1	1	1	1	1	1	1	1	1	1	0.59	0.15	0.19	0.44	0	0	0	0
ERR029533_ST1	ST1		0.73	1	1	1	1	1	0.29	0.43	0	0.15	0.68	0.59	0.74	0.3	0.38	0	0	0.1	0	0	0	0	0	0	0	0.15	0	1	1	1	1	1	1	1	1	1	1	1	1	0.59	0.15	0.19	0.44	0	0	0	0
ERR029534_ST1	ST1		0.73	1	1	1	1	1	0.29	0.43	0	0.15	0.68	0.59	0.74	0.3	0.38	0	0	0.1	0	0	0	0	0	0	0	0.15	0	1	1	1	1	1	1	1	1	1	1	1	1	0.59	0.15	0.19	0.44	0	0	0	0
ERR029535_ST1	ST1		0.73	1	1	1	1	1	0.29	0.43	0	0.15	0.68	0.59	0.74	0.3	0.38	0	0	0.1	0	0	0	0	0	0	0	0.15	0	1	1	1	1	1	1	1	1	1	1	1	1	0.59	0.15	0.19	0.44	0	0	0	0
ERR029536_ST1	ST1		0.73	1	1	1	1	1	0.29	0.43	0	0.15	0.68	0.59	0.74	0.3	0.38	0	0	0.1	0	0	0	0	0	0	0	0.15	0	1	1	1	1	1	1	1	1	1	1	1	1	0.59	0.15	0.19	0.44	0	0	0	0
ERR029537_ST1	ST1		0.73	1	1	1	1	1	0.27	0	0	0.15	0.68	0.59	0.74	0.3	0.38	0	0	0.1	0	0	0	0	0	0	0	0.15	0	0	0.08	0	0	0.12	0.21	0.31	0.3	0.23	0.29	0.34	0	0	0.15	0.19	0.1	0	0	0	0
ERR029538_ST1	ST1		0.73	1	1	1	1	1	0.27	0	0	0.25	0.68	0.59	0.74	0.3	0.38	0	0	0.1	0	0	0	0	0	0	0	0.15	0	0	0.08	0	0	0.12	0.21	0.31	0.3	0.36	0.29	0.34	1	0	0.15	0.19	0.1	0	0	0	0
ERR029539_ST1	ST1		0.73	1	1	1	1	1	0.29	0.43	0	0.15	0.68	0.59	0.74	0.3	0.38	0	0	0.1	0	0	0	0	0	0	0	0.15	0	1	1	1	1	1	1	1	1	1	1	1	1	0.59	0.15	0.19	0.44	0	0	0	0
ERR029540_ST1	ST1		0.73	1	1	1	1	1	0.29	0.43	0	0.15	0.68	0.59	0.74	0.3	0.38	0	0	0.1	0	0	0	0	0	0	0	0.15	0	1	1	1	1	1	1	1	1	1	1	1	1	0.59	0.15	0.19	0.44	0	0	0	0
ERR029541_ST1	ST1		0.73	1	1	1	1	0.35	0.27	0	0	0.15	0.68	0.59	0.74	0.3	0.38	0	0	0.1	0	0	0	0	0	0	0	0.15	0	0	0.08	0	0	0.12	0.21	0.31	0.3	0.23	0.29	0.34	0	0	0.15	0.19	0.1	0	0	0	0
ERR029542_ST1	ST1		0.73	1	1	1	1	1	0.29	0.43	0	0.15	0.68	0.59	0.74	0.3	0.38	0	0	0.1	0	0	0	0	0	0	0	0.15	0	1	1	1	1	1	1	1	1	1	1	1	1	0.59	0.15	0.19	0.44	0	0	0	0
ERR029544_ST1	ST1		0.73	1	1	1	1	1	0.29	0.43	0	0.15	0.68	0.59	0.74	0.3	0.38	0	0	0.1	0	0	0	0	0	0	0	0.15	0	1	1	1	1	1	1	1	1	1	1	1	1	0.59	0.15	0.19	0.44	0	0	0	0
ERR030283_ST1	ST1		0.73	1	1	1	1	1	0.29	0.43	0	0.15	0.68	0.59	0.74	0.3	0.38	0	0	0.1	0	0	0	0	0	0	0	0.15	0	1	1	1	1	1	1	1	1	1	1	1	1	0.59	0.15	0.19	0.44	0	0	0	0
ERR030284_ST1	ST1		0.73	1	1	1	1	1	0.29	0.43	0	0.15	0.68	0.59	0.74	0.3	0.38	0	0	0.1	0	0	0	0	0	0	0	0.15	0	1	1	1	1	1	1	1	1	1	1	1	1	0.59	0.15	0.19	0.44	0	0	0	0
ERR030285_ST1	ST1		0.73	1	1	1	1	1	0.29	0.43	0	0.15	0.68	0.59	0.74	0.3	0.38	0	0	0.1	0	0	0	0	0	0	0	0.15	0	1	1	1	1	1	1	1	1	1	1	1	1	0.59	0.15	0.19	0.44	0	0	0	0
ERR030286_ST1	ST1		0.73	1	1	1	1	1	0.29	0.43	0	0.15	0.68	0.59	0.74	0.3	0.38	0	0	0.1	0	0	0	0	0	0	0	0.15	0	1	1	1	1	1	1	1	1	1	1	1	1	0.59	0.15	0.19	0.44	0	0	0	0
ERR030287_ST1	ST1		0.73	1	1	1	1	1	0.29	0.43	0	0.15	0.68	0.59	0.74	0.3	0.38	0	0	0.1	0	0	0	0	0	0	0	0.15	0	1	1	1	1	1	1	1	1	1	1	1	1	0.59	0.15	0.19	0.44	0	0	0	0
ERR030288_ST1	ST1		0.73	1	1	1	1	1	0.29	0.43	0	0.15	0.68	0.59	0.74	0.3	0.38	0	0	0.1	0	0	0	0	0	0	0	0.15	0	1	1	1	1	1	1	1	1	1	1	1	1	0.59	0.15	0.19	0.44	0	0	0	0
ERR030289_ST1	ST1		0.73	1	1	1	1	1	1	1	1	1	1	1	1	1	1	1	1	1	1	0.99	1	1	1	1	1	1	1	1	1	1	1	1	1	1	1	1	1	1	1	1	1	1	1	1	0.99	0.99	1
ERR030290_ST1	ST1		0.73	1	1	1	1	1	0.29	0.43	0	0.15	0.68	0.59	0.74	0.3	0.38	0	0	0.1	0	0	0	0	0	0	0	0.15	0	1	1	1	1	1	1	1	1	1	1	1	1	0.59	0.15	0.19	0.44	0	0	0	0
ERR030291_ST1	ST1		0.73	1	1	1	1	1	0.29	0.43	0	0.15	0.68	0.59	0.74	0.3	0.38	0	0	0.1	0	0	0	0	0	0	0	0.15	0	1	1	1	1	1	1	1	1	1	1	1	1	0.59	0.15	0.19	0.44	0	0	0	0
ERR030292_ST1	ST1		0.73	1	1	1	1	1	0.29	0.43	0	0.15	0.68	0.59	0.74	0.3	0.38	0	0	0.1	0	0	0	0	0	0	0	0.15	0	1	1	1	1	1	1	1	1	1	1	1	1	0.59	0.15	0.19	0.44	0	0	0	0
ERR030293_ST1	ST1		0.73	1	1	1	1	1	0.29	0.43	0	0.15	0.68	0.59	0.74	0.3	0.38	0	0	0.1	0	0	0	0	0	0	0	0.15	0	1	1	1	1	1	1	1	1	1	1	1	1	0.59	0.15	0.19	0.44	0	0	0	0
ERR030294_ST1	ST1		0.73	1	1	1	1	1	0.29	0.43	0	0.15	0.68	0.59	0.74	0.3	0.38	0	0	0.1	0	0	0	0	0	0	0	0.15	0	1	1	1	1	1	1	1	1	1	1	1	1	0.59	0.15	0.19	0.44	0	0	0	0
ERR030296_ST1	ST1		0.73	1	1	1	1	1	0.29	0.43	0	0.15	0.68	0.59	0.74	0.3	0.38	0	0	0.1	0	0	0	0	0	0	0	0.15	0	1	1	1	1	1	1	1	1	1	1	1	1	0.59	0.15	0.19	0.44	0	0	0	0
ERR030297_ST1	ST1		0.73	1	1	1	1	1	0.29	0.43	0	0.15	0.68	0.59	0.74	0.3	0.38	0	0	0.1	0	0	0	0	0	0	0	0.15	0	1	1	1	1	1	1	1	1	1	1	1	1	0.59	0.15	0.19	0.44	0	0	0	0
ERR030298_ST1	ST1		0.73	1	1	1	1	1	0.29	0.43	0	0.15	0.68	0.59	0.74	0.3	0.38	0	0	0.1	0	0	0	0	0	0	0	0.15	0	1	1	1	1	1	1	1	1	1	1	1	1	0.59	0.15	0.19	0.44	0	0	0	0
ERR030299_ST1	ST1		0.73	1	1	1	1	1	0.29	0.43	0	0.15	0.68	0.59	0.74	0.3	0.38	0	0	0.1	0	0	0	0	0	0	0	0.15	0	1	1	1	1	1	1	1	1	1	1	1	1	0.59	0.15	0.19	0.44	0	0	0	0
ERR030300_ST1	ST1		0.73	1	1	1	1	1	0.29	0.43	0	0.15	0.68	0.59	0.74	0.3	0.38	0	0	0.1	0	0	0	0	0	0	0	0.15	0	1	1	1	1	1	1	1	1	1	1	1	1	0.59	0.15	0.19	0.44	0	0	0	0
ERR030301_ST1	ST1		0.73	1	1	1	1	1	0.29	0.43	0	0.15	0.68	0.59	0.74	0.3	0.38	0	0	0.1	0	0	0	0	0	0	0	0.15	0	1	1	1	1	1	1	1	1	1	1	1	1	0.59	0.15	0.19	0.44	0	0	0	0
ERR030302_ST1	ST1		0.73	1	1	1	1	1	0.29	0.43	0	0.15	0.68	0.59	0.74	0.3	0.38	0	0	0.1	0	0	0	0	0	0	0	0.15	0	1	1	1	1	1	1	1	1	1	1	1	1	0.59	0.15	0.19	0.44	0	0	0	0
ERR030303_ST1	ST1		0.73	1	1	1	1	1	1	1	1	1	1	1	1	1	1	1	1	1	1	0.99	1	1	1	1	1	1	1	1	1	1	1	1	1	1	1	1	1	1	1	1	1	1	1	1	0.99	0.99	1
ERR030304_ST1	ST1		0.73	1	1	1	1	1	0.29	0.43	0	0.15	0.68	0.59	0.74	0.3	0.38	0	0	0.1	0	0	0	0	0	0	0	0.15	0	1	1	1	1	1	1	1	1	1	1	1	1	0.59	0.15	0.19	0.44	0	0	0	0
ERR030305_ST1	ST1		0.73	1	1	1	1	1	0.29	0.43	0	0.15	0.68	0.59	0.74	0.3	0.38	0	0	0.1	0	0	0	0	0	0	0	0.15	0	1	1	1	1	1	1	1	1	1	1	1	1	0.59	0.15	0.19	0.44	0	0	0	0
ERR030306_ST1	ST1		0.73	1	1	1	1	1	0.29	0.43	0	0.15	0.68	0.59	0.74	0.3	0.38	0	0	0.1	0	0	0	0	0	0	0	0.15	0	1	1	1	1	1	1	1	1	1	1	1	1	0.59	0.15	0.19	0.44	0	0	0	0
ERR030307_ST1	ST1		0.73	1	1	1	1	1	0.29	0.43	0	0.15	0.68	0.59	0.74	0.3	0.38	0	0	0.1	0	0	0	0	0	0	0	0.15	0	1	1	1	1	1	1	1	1	1	1	1	1	0.59	0.15	0.19	0.44	0	0	0	0
ERR030309_ST1	ST1		0.73	1	1	1	1	1	0.29	0.43	0	0.15	0.68	0.59	0.74	0.3	0.38	0	0	0.1	0	0	0	0	0	0	0	0.15	0	1	1	1	1	1	1	1	1	1	1	1	1	0.59	0.15	0.19	0.44	0	0	0	0
ERR030310_ST1	ST1		0.73	1	1	1	1	1	0.29	0.43	0	0.15	0.68	0.59	0.74	0.3	0.38	0	0	0.1	0	0	0	0	0	0	0	0.15	0	1	1	1	1	1	1	1	1	1	1	1	1	0.59	0.15	0.19	0.44	0	0	0	0
ERR030311_ST1	ST1		0.73	1	1	1	1	1	0.29	0.43	0	0.15	0.68	0.59	0.74	0.3	0.38	0	0	0.1	0	0	0	0	0	0	0	0.15	0	1	1	1	1	1	1	1	1	1	1	1	1	0.59	0.15	0.19	0.44	0	0	0	0
ERR030312_ST1	ST1		0.73	1	1	1	1	1	0.29	0.43	0	0.15	0.68	0.59	0.74	0.3	0.38	0	0	0.1	0	0	0	0	0	0	0	0.15	0	1	1	1	1	1	1	1	1	1	1	1	1	0.59	0.15	0.19	0.44	0	0	0	0
ERR030313_ST1	ST1		0.73	1	1	1	1	1	0.29	0.43	0	0.15	0.68	0.59	0.74	0.3	0.38	0	0	0.1	0	0	0	0	0	0	0	0.15	0	1	1	1	1	1	1	1	1	1	1	1	1	0.59	0.15	0.19	0.44	0	0	0	0
ERR030314_ST1	ST1		0.73	1	1	1	1	1	0.29	0.43	0	0.15	0.68	0.59	0.74	0.3	0.38	0	0	0.1	0	0	0	0	0	0	0	0.15	0	1	1	1	1	1	1	1	1	1	1	1	1	0.59	0.15	0.19	0.44	0	0	0	0
ERR030315_ST1	ST1		0.73	1	1	1	1	1	0.29	0.43	0	0.15	0.68	0.59	0.74	0.3	0.38	0	0	0.1	0	0	0	0	0	0	0	0.15	0	1	1	1	1	1	1	1	1	1	1	1	1	0.59	0.15	0.19	0.44	0	0	0	0
ERR030316_ST1	ST1		0.73	1	1	1	1	1	0.29	0.43	0	0.15	0.68	0.59	0.74	0.3	0.38	0	0	0.1	0	0	0	0	0	0	0	0.15	0	1	1	1	1	1	1	1	1	1	1	1	1	0.59	0.15	0.19	0.44	0	0	0	0
ERR030318_ST1	ST1		0.73	1	1	1	1	1	0.29	0.43	0	0.15	0.68	0.59	0.74	0.3	0.38	0	0	0.1	0	0	0	0	0	0	0	0.15	0	1	1	1	1	1	1	1	1	1	1	1	1	0.59	0.15	0.19	0.44	0	0	0	0
ERR030319_ST1	ST1		0.73	1	1	1	1	0.35	0.27	0	0	0.15	0.68	0.59	0.74	0.3	0.38	0	0	0.1	0	0	0	0	0	0	0	0.15	0	0	0.08	0	0	0.12	0.21	0.31	0.3	0.23	0.29	0.34	0	0	0.15	0.19	0.1	0	0	0	0
ERR030320_ST1	ST1		0.73	1	1	1	1	1	0.29	0.43	0	0.15	0.68	0.59	0.74	0.3	0.38	0	0	0.1	0	0	0	0	0	0	0	0.15	0	1	1	1	1	1	1	1	1	1	1	1	1	0.59	0.15	0.19	0.44	0	0	0	0
ERR030322_ST1	ST1		0.73	1	1	1	1	1	0.29	0.43	0	0.15	0.68	0.59	0.74	0.3	0.38	0	0	0.1	0	0	0.33	0	0	0	0	0.15	0	1	1	1	1	1	1	1	1	1	1	1	1	1	1	1	1	1	0.99	0.99	1
ERR030323_ST1	ST1		0.73	1	1	1	1	0.58	0.27	0	0	0.15	0.68	0.59	0.74	0.3	0.38	0	0	0.1	0	0	0	0	0	0	0	0.15	0	0	0.08	0	0	0.12	0.21	0.31	0.3	0.23	0.29	0.34	0	0	0.15	0.19	0.1	0	0	0	0
ERR030324_ST1	ST1		0.73	1	1	1	1	1	0.27	0	0	0.25	0.96	0.98	0.99	1	1	0.98	0	0.29	0.31	0	0	0	0	0.2	0	0.15	0	0	0.08	0	0	0.12	0.21	0.31	0.3	0.32	0.29	0.34	1	0	0.15	0.19	0.1	0	0	0	0.04
ERR030325_ST1	ST1		0.73	1	1	1	1	1	0.27	0	0	0.15	0.68	0.59	0.74	0.3	0.38	0	0	0.1	0	0	0	0	0	0	0	0.15	0	0	0.08	0	0	0.12	0.21	0.31	0.3	0.23	0.29	0.34	0	0	0.15	0.19	0.1	0	0	0	0
ERR030326_ST1	ST1		0.73	1	1	1	1	1	0.29	0.43	0	0.15	0.68	0.59	0.74	0.3	0.38	0	0	0.1	0	0	0	0	0	0	0	0.15	0	1	1	1	1	1	1	1	1	1	1	1	1	0.59	0.15	0.19	0.44	0	0	0	0
ERR030327_ST1	ST1		0.73	1	1	1	1	1	0.29	0.43	0	0.15	0.68	0.59	0.74	0.3	0.38	0	0	0.1	0	0	0	0	0	0	0	0.15	0	1	1	1	1	1	1	1	1	1	1	1	1	0.59	0.15	0.19	0.44	0	0	0	0
ERR030328_ST1	ST1		0.73	1	1	1	1	1	0.29	0.43	0	0.15	0.68	0.59	0.74	0.3	0.38	0	0	0.1	0	0	0	0	0	0	0	0.15	0	1	1	1	1	1	1	1	1	1	1	1	1	0.59	0.15	0.19	0.44	0	0	0	0
ERR030329_ST1	ST1		0.73	1	1	1	1	1	0.29	0.43	0	0.15	0.68	0.59	0.74	0.3	0.38	0	0	0.1	0	0	0	0	0	0	0	0.15	0	1	1	1	1	1	1	1	1	1	1	1	1	0.59	0.15	0.19	0.44	0	0	0	0
ERR030330_ST1	ST1		0.73	1	1	1	1	1	0.29	0.43	0	0.15	0.68	0.59	0.74	0.3	0.38	0	0	0.1	0	0	0	0	0	0	0	0.15	0	1	1	1	1	1	1	1	1	1	1	1	1	0.59	0.15	0.19	0.44	0	0	0	0
ERR030331_ST1	ST1		0.73	1	1	1	1	1	1	1	1	1	1	1	1	1	1	1	1	1	1	0.99	1	1	1	1	1	1	1	1	1	1	1	1	1	1	1	1	1	1	1	1	1	1	1	1	0.99	0.99	1
ERR030333_ST1	ST1		0.73	1	1	1	1	0.06	0.11	0	0	0.15	0.68	0.59	0.74	0.3	0.38	0	0	0.1	0	0.18	0	0	0	0	0	0.15	0	0	0.08	0	0	0.12	0	0.15	0.12	0.23	0.29	0.34	0	0	0.15	0.19	0.1	0	0	0	0
ERR030335_ST1	ST1		0.73	1	1	1	1	1	0.29	0.43	0	0.15	0.68	0.59	0.74	0.3	0.38	0	0	0.1	0	0	0	0	0	0	0	0.15	0	1	1	1	1	1	1	1	1	1	1	1	1	0.59	0.15	0.19	0.44	0	0	0	0
ERR030336_ST1	ST1		0.73	1	1	1	1	1	0.29	0.43	0	0.15	0.68	0.59	0.74	0.3	0.38	0	0	0.1	0	0	0	0	0	0	0	0.15	0	1	1	1	1	1	1	1	1	1	1	1	1	0.59	0.15	0.19	0.44	0	0	0	0
ERR030337_ST1	ST1		0.73	1	1	1	1	1	0.27	0	0	0.15	0.68	0.59	0.74	0.3	0.38	0	0	0.1	0	0	0	0	0	0	0	0.15	0	0	0.08	0	0	0.12	0.21	0.31	0.3	0.23	0.29	0.34	0	0	0.15	0.19	0.1	0	0	0	0
ERR030338_ST1	ST1		0.73	1	1	1	1	1	0.29	0.43	0	0.15	0.68	0.59	0.74	0.3	0.38	0	0	0.1	0	0	0	0	0	0.1	0	0.15	0	1	1	1	1	1	1	1	1	1	1	1	1	0.59	0.15	0.19	0.44	0	0	0	0
ERR030339_ST1	ST1		0.73	1	1	1	1	1	0.27	0	0	0.15	0.68	0.59	0.74	0.3	0.38	0	0	0.1	0	0	0	0	0	0	0	0.15	0	0	0.08	0	0	0.12	0.21	0.31	0.3	0.23	0.29	0.34	0	0	0.15	0.19	0.1	0	0	0	0.05
ERR030340_ST1	ST1		0.73	1	1	1	1	1	0.27	0	0	0.15	0.68	0.59	0.74	0.3	0.38	0	0	0.1	0	0	0	0	0	0	0	0.15	0	0	0.08	0	0	0.12	0.21	0.31	0.3	0.23	0.29	0.34	0	0	0.15	0.19	0.1	0	0	0	0
ERR030341_ST1	ST1		0.73	1	1	1	1	1	0.27	0	0	0.15	0.68	0.59	0.74	0.3	0.38	0	0	0.1	0	0	0	0	0	0	0	0.15	0	0	0.08	0	0	0.12	0.21	0.31	0.3	0.23	0.29	0.34	0	0	0.15	0.19	0.1	0	0	0	0
ERR030342_ST1	ST1		0.73	1	1	1	1	1	0.27	0	0	0.15	0.68	0.59	0.74	0.3	0.38	0	0	0.1	0	0.18	0	0	0	0	0	0.15	0	0	0.08	0	0	0.12	0.21	0.31	0.3	0.23	0.29	0.34	0	0	0.15	0.19	0.1	0	0	0	0
ERR030344_ST1	ST1		0.73	1	1	1	1	1	0.27	0	0	0.15	0.68	0.59	0.74	0.3	0.38	0	0	0.1	0	0	0	0	0	0	0	0.15	0	0	0.08	0	0	0.12	0.21	0.31	0.3	0.23	0.29	0.34	0	0	0.15	0.19	0.1	0	0	0	0.05
ERR030345_ST1	ST1		0.73	1	1	1	1	0.35	0.27	0	0	0.15	0.68	0.59	0.74	0.3	0.38	0	0	0.1	0	0	0	0	0	0	0	0.15	0	0	0.08	0	0	0.12	0.21	0.31	0.3	0.23	0.29	0.34	0	0	0.15	0.19	0.1	0	0	0	0
ERR030346_ST1	ST1		0.73	1	1	1	1	1	0.29	0.43	0	0.15	0.68	0.59	0.74	0.3	0.38	0	0	0.1	0	0	0	0	0	0	0	0.15	0	1	1	1	1	1	1	1	1	1	1	1	1	0.59	0.15	0.19	0.44	0	0	0	0
ERR030348_ST1	ST1		0.73	1	1	1	1	1	0.29	0.43	0	0.15	0.68	0.59	0.74	0.3	0.38	0	0	0.1	0	0	0	0	0	0	0	0.15	0	1	1	1	1	1	1	1	1	1	1	1	1	0.59	0.15	0.19	0.44	0	0	0	0
ERR030349_ST1	ST1		0.73	1	1	1	1	1	0.29	0.43	0	0.15	0.68	0.59	0.74	0.3	0.38	0	0	0.1	0	0	0	0	0	0	0	0.15	0	1	1	1	1	1	1	1	1	1	1	1	1	0.59	0.15	0.19	0.44	0	0	0	0
ERR030350_ST1	ST1		0.73	1	1	1	1	1	0.29	0.43	0	0.15	0.68	0.59	0.74	0.3	0.38	0	0	0.1	0	0	0	0	0	0	0	0.15	0	1	1	1	1	1	1	1	1	1	1	1	1	0.59	0.15	0.19	0.44	0	0	0	0
ERR030351_ST1	ST1		0.73	1	1	1	1	1	0.29	0.43	0	0.15	0.68	0.59	0.74	0.3	0.38	0	0	0.1	0	0	0	0	0	0	0	0.15	0	1	1	1	1	1	1	1	1	1	1	1	1	0.59	0.15	0.19	0.44	0	0	0	0
ERR030352_ST1	ST1		0.73	1	1	1	1	1	0.29	0.43	0	0.15	0.68	0.59	0.74	0.3	0.38	0	0	0.1	0	0	0	0	0	0	0	0.15	0	1	1	1	1	1	1	1	1	1	1	1	1	0.59	0.15	0.19	0.44	0	0	0	0
ERR030353_ST1	ST1		0.73	1	1	1	1	1	0.29	0.43	0	0.15	0.68	0.59	0.74	0.3	0.38	0	0	0.1	0	0	0	0	0	0	0	0.15	0	1	1	1	1	1	1	1	1	1	1	1	1	0.59	0.15	0.19	0.44	0	0	0	0
ERR030354_ST1	ST1		0.73	1	1	1	1	1	0.29	0.43	0	0.15	0.68	0.59	0.74	0.3	0.38	0	0	0.1	0	0	0	0	0	0	0	0.15	0	1	1	1	1	1	1	1	1	1	1	1	1	0.59	0.15	0.19	0.44	0	0	0	0
ERR030355_ST1	ST1		0.73	1	1	1	1	1	0.29	0.43	0	0.15	0.68	0.59	0.74	0.3	0.38	0	0	0.1	0	0	0	0	0	0	0	0.15	0	1	1	1	1	1	1	1	1	1	1	1	1	0.59	0.15	0.19	0.44	0	0	0	0
ERR030357_ST1	ST1		0.73	1	1	1	1	1	0.29	0.43	0	0.15	0.68	0.59	0.74	0.3	0.38	0	0	0.1	0	0	0	0	0	0	0	0.15	0	1	1	1	1	1	1	1	1	1	1	1	1	0.59	0.15	0.19	0.44	0	0	0	0
ERR030358_ST1	ST1		0.73	1	1	1	1	1	0.29	0.43	0	0.15	0.68	0.59	0.74	0.3	0.38	0	0	0.1	0	0	0	0	0	0	0	0.15	0	1	1	1	1	1	1	1	1	1	1	1	1	0.59	0.15	0.19	0.44	0	0	0	0
ERR030359_ST1	ST1		0.73	1	1	1	1	0.35	0.27	0	0	0.15	0.68	0.59	0.74	0.3	0.38	0	0	0.1	0	0	0	0	0	0	0	0.15	0	0	0.08	0	0	0.12	0.21	0.31	0.3	0.23	0.29	0.34	0	0	0.15	0.19	0.1	0	0	0	0
ERR030361_ST1	ST1		0.73	1	1	1	1	1	0.29	0.43	0	0.15	0.68	0.59	0.74	0.3	0.38	0	0	0.1	0	0	0	0	0	0	0	0.15	0	1	1	1	1	1	1	1	1	1	1	1	1	0.59	0.15	0.19	0.44	0	0	0	0
ERR030362_ST1	ST1		0.73	1	1	1	1	1	0.29	0.43	0	0.15	0.68	0.59	0.74	0.3	0.38	0	0	0.1	0	0	0	0	0	0	0	0.15	0	1	1	1	1	1	1	1	1	1	1	1	1	0.59	0.15	0.19	0.44	0	0	0	0
ERR030363_ST1	ST1		0.73	1	1	1	1	1	0.29	0.43	0	0.15	0.68	0.59	0.74	0.3	0.38	0	0	0.1	0	0	0	0	0	0	0	0.15	0	1	1	1	1	1	1	1	1	1	1	1	1	0.59	0.15	0.19	0.44	0	0	0	0
ERR030364_ST1	ST1		0.73	1	1	1	1	1	0.29	0.43	0	0.15	0.68	0.59	0.74	0.3	0.38	0	0	0.1	0	0	0	0	0	0.1	0	0.15	0	1	1	1	1	1	1	1	1	1	1	1	1	0.59	0.15	0.19	0.44	0	0	0	0
ERR030365_ST1	ST1		0.73	1	1	1	1	1	0.29	0.43	0	0.15	0.68	0.59	0.74	0.3	0.38	0	0	0.1	0	0	0	0	0	0	0	0.15	0	1	1	1	1	1	1	1	1	1	1	1	1	0.59	0.15	0.19	0.44	0	0	0	0
ERR030366_ST1	ST1		0.73	1	1	1	1	1	0.29	0.43	0	0.15	0.68	0.59	0.74	0.3	0.38	0	0	0.1	0	0	0	0	0	0	0	0.15	0	1	1	1	1	1	1	1	1	1	1	1	1	0.59	0.15	0.19	0.44	0	0	0	0
ERR030367_ST1	ST1		0.73	1	1	1	1	1	0.29	0.43	0	0.15	0.68	0.59	0.74	0.3	0.38	0	0	0.1	0	0	0	0	0	0	0	0.15	0	1	1	1	1	1	1	1	1	1	1	1	1	0.59	0.15	0.19	0.44	0	0	0	0
ERR030368_ST1	ST1		0.73	1	1	1	1	0.35	0.27	0	0	0.15	0.68	0.59	0.74	0.3	0.38	0	0	0.1	0	0	0	0	0	0	0	0.15	0	0	0.08	0	0	0.12	0.21	0.31	0.3	0.23	0.29	0.34	0	0	0.15	0.19	0.1	0	0	0	0
ERR030370_ST1	ST1		0.73	1	1	1	1	1	0.29	0.43	0	0.15	0.68	0.59	0.74	0.3	0.38	0	0	0.1	0	0	0	0	0	0	0	0.15	0	1	1	1	1	1	1	1	1	1	1	1	1	0.59	0.15	0.19	0.44	0	0	0	0
ERR030371_ST1	ST1		0.73	1	1	1	1	1	0.29	0.43	0	0.15	0.68	0.59	0.74	0.3	0.38	0	0	0.1	0	0	0	0	0	0	0	0.15	0	1	1	1	1	1	1	1	1	1	1	1	1	0.59	0.15	0.19	0.44	0	0	0	0
ERR030372_ST1	ST1		0.73	1	1	1	1	1	0.29	0.43	0	0.15	0.68	0.59	0.74	0.3	0.38	0	0	0.1	0	0	0	0	0	0	0	0.15	0	1	1	1	1	1	1	1	1	1	1	1	1	0.59	0.15	0.19	0.44	0	0	0	0
ERR030374_ST1	ST1		0.73	1	1	1	1	1	0.29	0.43	0	0.15	0.68	0.59	0.74	0.3	0.38	0	0	0.1	0	0	0	0	0	0	0	0.15	0	1	1	1	1	1	1	1	1	1	1	1	1	0.59	0.15	0.19	0.44	0	0	0	0
ERR030375_ST1	ST1		0.73	1	1	1	1	1	0.29	0.43	0	0.15	0.68	0.59	0.74	0.3	0.38	0	0	0.1	0	0	0	0	0	0	0	0.15	0	1	1	1	1	1	1	1	1	1	1	1	1	0.59	0.15	0.19	0.44	0	0	0	0
ERR030376_ST1	ST1		0.73	1	1	1	1	1	0.29	0.43	0	0.15	0.68	0.59	0.74	0.3	0.38	0	0	0.1	0	0	0	0	0	0	0	0.15	0	1	1	1	1	1	1	1	1	1	1	1	1	0.59	0.15	0.19	0.44	0	0	0	0
ERR030377_ST1	ST1		0.73	1	1	1	1	1	0.29	0.43	0	0.15	0.68	0.59	0.74	0.3	0.38	0	0	0.1	0	0	0	0	0	0	0	0.15	0	1	1	1	1	1	1	1	1	1	1	1	1	0.59	0.15	0.19	0.44	0	0	0	0
ERR030378_ST1	ST1		0.73	1	1	1	1	1	0.29	0.43	0	0.15	0.68	0.59	0.74	0.3	0.38	0	0	0.1	0	0	0	0	0	0	0	0.15	0	1	1	1	1	1	1	1	1	1	1	1	1	0.59	0.15	0.19	0.44	0	0	0	0
ERR030379_ST1	ST1		0.73	1	1	1	1	1	0.29	0.43	0	0.15	0.68	0.59	0.74	0.3	0.38	0	0	0.1	0	0	0.33	0	0	0	0	0.15	0	1	1	1	1	1	1	1	1	1	1	1	1	1	1	1	1	1	0.99	0.99	1
ERR030380_ST1	ST1		0.73	1	1	1	1	1	0.29	0.43	0	0.15	0.68	0.59	0.74	0.3	0.38	0	0	0.1	0	0	0.33	0	0	0	0	0.15	0	1	1	1	1	1	1	1	1	1	1	1	1	1	1	1	1	1	0.99	0.99	1
ERR030381_ST1	ST1		0.73	1	1	1	1	1	0.29	0.43	0	0.15	0.68	0.59	0.74	0.3	0.38	0	0	0.1	0	0	0.33	0	0	0	0	0.15	0	1	1	0.99	1	1	1	1	1	1	1	1	1	1	1	1	1	1	0.99	0.99	1
ERR030384_ST1	ST1		0.73	1	1	1	1	1	0.31	0.43	0	0.26	0.88	0.87	0.95	0.3	0.38	0.44	0	0.1	0	0	0.06	0	0	0.42	0	0.15	0	1	1	1	1	1	1	1	1	1	1	1	1	0.59	0.15	0.19	0.45	0.2	0	0	0
ERR030385_ST1	ST1		0.73	1	1	1	1	0.35	0.27	0	0	0.15	0.68	0.59	0.74	0.3	0.38	0	0	0.1	0	0	0	0	0	0	0	0.15	0	0	0.08	0	0	0.12	0.21	0.31	0.3	0.23	0.29	0.34	0	0	0.15	0.19	0.1	0	0	0	0
ERR030387_ST1	ST1		0.73	1	1	1	1	1	0.29	0.43	0	0.15	0.68	0.59	0.74	0.3	0.38	0	0	0.1	0	0	0	0	0	0	0	0.15	0	1	1	1	1	1	1	1	1	1	1	1	1	0.59	0.15	0.19	0.44	0	0	0	0
ERR030388_ST1	ST1		0.73	1	1	1	1	1	0.29	0.43	0	0.15	0.68	0.59	0.74	0.3	0.38	0	0	0.1	0	0	0	0	0	0	0	0.15	0	1	1	1	1	1	1	1	1	1	1	1	1	0.59	0.15	0.19	0.44	0	0	0	0
ERR030389_ST1	ST1		0.73	1	1	1	1	1	0.29	0.43	0	0.15	0.68	0.59	0.74	0.3	0.38	0	0	0.1	0	0	0	0	0	0	0	0.15	0	1	1	1	1	1	1	1	1	1	1	1	1	0.59	0.15	0.19	0.44	0	0	0	0
ERR030390_ST1	ST1		0.73	1	1	1	1	1	0.29	0.43	0	0.15	0.68	0.59	0.74	0.3	0.38	0	0	0.1	0	0.19	0	0	0	0	0	0.15	0	1	1	1	1	1	1	1	1	1	1	1	1	0.59	0.15	0.19	0.44	0	0	0	0
ERR030391_ST1	ST1		0.73	1	1	1	1	1	0.29	0.43	0	0.15	0.68	0.59	0.74	0.3	0.38	0	0	0.1	0	0	0	0	0	0	0	0.15	0	1	1	1	1	1	1	1	1	1	1	1	1	0.59	0.15	0.19	0.44	0	0	0	0
ERR030392_ST1	ST1		0.73	1	1	1	1	1	0.29	0.43	0	0.15	0.68	0.59	0.74	0.3	0.38	0	0	0.1	0	0	0	0	0	0	0	0.15	0	1	1	1	1	1	1	1	1	1	1	1	1	0.59	0.15	0.19	0.44	0	0	0	0
ERR030393_ST1	ST1		0.73	1	1	1	1	1	0.29	0.43	0	0.15	0.68	0.59	0.74	0.3	0.38	0	0	0.1	0	0	0	0	0	0	0	0.15	0	1	1	1	1	1	1	1	1	1	1	1	1	0.59	0.15	0.19	0.44	0	0	0	0
ERR030394_ST1	ST1		0.73	1	1	1	1	1	0.29	0.43	0	0.15	0.68	0.59	0.74	0.3	0.38	0	0	0.1	0	0	0	0	0	0	0	0.15	0	1	1	1	1	1	1	1	1	1	1	1	1	0.59	0.15	0.19	0.44	0	0	0	0
ERR030395_ST1	ST1		0.73	1	1	1	1	1	0.29	0.43	0	0.15	0.68	0.59	0.74	0.3	0.38	0	0	0.1	0	0	0	0	0	0.1	0	0.15	0	1	1	1	1	1	1	1	1	1	1	1	1	0.59	0.15	0.19	0.44	0	0	0	0
ERR030396_ST1	ST1		0.73	1	1	1	1	1	0.29	0.43	0	0.15	0.68	0.59	0.74	0.3	0.38	0	0	0.1	0	0	0	0	0	0	0	0.15	0	1	1	1	1	1	1	1	1	1	1	1	1	0.59	0.15	0.19	0.44	0	0	0	0
ERR030397_ST1	ST1		0.73	1	1	1	1	0.35	0.27	0	0	0.15	0.68	0.59	0.74	0.3	0.38	0	0	0.1	0	0	0	0	0	0	0	0.15	0	0	0.08	0	0	0.12	0.21	0.31	0.3	0.23	0.29	0.34	0	0	0.15	0.19	0.1	0	0	0	0
ERR030398_ST1	ST1		0.73	1	1	1	1	1	0.29	0.43	0	0.15	0.68	0.59	0.74	0.3	0.38	0	0	0.1	0	0	0	0	0	0	0	0.15	0	1	1	1	1	1	1	1	1	1	1	1	1	0.59	0.15	0.19	0.44	0	0	0	0
ERR031674_ST1	ST1		0.73	1	1	1	1	1	1	1	1	1	1	1	1	1	1	1	1	1	1	0.99	1	1	1	1	1	1	1	1	1	1	1	1	1	1	1	1	1	1	1	1	1	1	1	1	0.99	0.99	1
ERR031675_ST1	ST1		0.73	1	1	1	1	1	0.29	0.43	0	0.15	0.68	0.59	0.74	0.3	0.38	0	0	0.1	0	0	0.33	0	0	0	0	0.15	0	1	1	0.99	1	1	1	1	1	1	1	1	1	1	1	1	1	1	0.99	0.99	1
ERR031676_ST1	ST1		0.73	1	1	1	1	1	0.29	0.43	0	0.15	0.68	0.59	0.74	0.3	0.38	0	0	0.1	0	0	0.33	0	0	0	0	0.15	0	1	1	0.99	1	1	1	1	1	1	1	1	1	1	1	1	1	1	0.99	0.99	1
ERR031677_ST1	ST1		0.73	1	1	1	1	1	0.29	0.43	0	0.15	0.68	0.59	0.74	0.3	0.38	0	0	0.1	0	0	0	0	0	0	0	0.15	0	1	1	1	1	1	1	1	1	1	1	1	1	0.59	0.15	0.19	0.44	0	0	0	0
ERR031678_ST1	ST1		0.73	1	1	1	1	1	0.29	0.43	0	0.15	0.68	0.59	0.74	0.3	0.38	0	0	0.1	0	0	0	0	0	0	0	0.15	0	1	1	1	1	1	1	1	1	1	1	1	1	0.59	0.15	0.19	0.44	0	0	0	0
ERR031680_ST1	ST1		0.73	1	1	1	1	1	0.29	0.43	0	0.15	0.68	0.59	0.74	0.3	0.38	0	0	0.1	0	0	0	0	0	0	0	0.15	0	1	1	1	1	1	1	1	1	1	1	1	1	0.59	0.15	0.19	0.44	0	0	0	0
ERR031681_ST1	ST1		0.73	1	1	1	1	1	0.29	0.43	0	0.15	0.68	0.59	0.74	0.3	0.38	0	0	0.1	0	0	0.33	0	0	0	0	0.15	0	1	1	1	1	1	1	1	1	1	1	1	1	1	1	1	1	1	0.99	0.99	1
ERR031682_ST1	ST1		0.73	1	1	1	1	1	0.29	0.43	0	0.15	0.68	0.59	0.74	0.3	0.38	0	0	0.1	0	0	0.33	0	0	0	0	0.15	0	1	1	1	1	1	1	1	1	1	1	1	1	1	1	1	1	1	0.99	0.99	1
ERR031683_ST1	ST1		0.73	1	1	1	1	1	0.29	0.43	0	0.15	0.68	0.59	0.74	0.3	0.38	0	0	0.1	0	0	0.33	0	0	0	0	0.15	0	1	1	1	1	1	1	1	1	1	1	1	1	1	1	1	1	1	0.99	0.99	1
ERR031685_ST1	ST1		0.73	1	1	1	1	1	0.29	0.43	0	0.15	0.68	0.59	0.74	0.3	0.38	0	0	0.1	0	0	0.33	0	0	0	0	0.15	0	1	1	1	1	1	1	1	1	1	1	1	1	1	1	1	1	1	0.99	0.99	1
ERR031687_ST1	ST1		0.73	1	1	1	1	1	0.29	0.43	0	0.15	0.68	0.59	0.74	0.3	0.38	0	0	0.1	0	0	0	0	0	0	0	0.15	0	1	1	1	1	1	1	1	1	1	1	1	1	0.59	0.15	0.19	0.44	0	0	0	0
ERR031689_ST1	ST1		0.73	1	1	1	1	1	0.27	0	0	0.25	0.68	0.59	0.74	0.3	0.38	0	0	0.1	0	0	0	0	0	0	0	0.15	0	0	0.08	0	0	0.12	0.21	0.31	0.3	0.39	0.29	0.34	1	0	0.15	0.19	0.1	0	0	0	0
ERR031690_ST1	ST1		0.73	1	1	1	1	1	0.27	0	0	0.25	0.68	0.59	0.74	0.3	0.38	0	0	0.1	0	0	0	0	0	0	0	0.15	0	0	0.08	0	0	0.12	0.21	0.31	0.3	0.39	0.29	0.34	1	0	0.15	0.19	0.1	0	0	0	0
ERR031691_ST1	ST1		0.73	1	1	1	1	1	0.29	0.43	0	0.15	0.68	0.59	0.74	0.3	0.38	0	0	0.1	0	0	0	0	0	0	0	0.15	0	1	1	1	1	1	1	1	1	1	1	1	1	0.59	0.15	0.19	0.44	0	0	0	0
ERR031692_ST1	ST1		0.73	1	1	1	1	1	0.29	0.43	0	0.15	0.68	0.59	0.74	0.3	0.38	0	0	0.1	0	0	0	0	0	0	0	0.15	0	1	1	1	1	1	1	1	1	1	1	1	1	0.59	0.15	0.19	0.44	0	0	0	0
ERR031693_ST1	ST1		0.73	1	1	1	1	1	0.29	0.43	0	0.15	0.68	0.59	0.74	0.3	0.38	0	0	0.1	0	0	0	0	0	0	0	0.15	0	1	1	1	1	1	1	1	1	1	1	1	1	0.59	0.15	0.19	0.44	0	0	0	0
ERR031694_ST1	ST1		0.73	1	1	1	1	1	0.29	0.43	0	0.15	0.68	0.59	0.74	0.3	0.38	0	0	0.1	0	0	0	0	0	0	0	0.15	0	1	1	1	1	1	1	1	1	1	1	1	1	0.59	0.15	0.19	0.44	0	0	0	0
ERR031695_ST1	ST1		0.73	1	1	1	1	1	0.29	0.43	0	0.15	0.68	0.59	0.74	0.3	0.38	0	0	0.1	0	0	0	0	0	0	0	0.15	0	1	1	1	1	1	1	1	1	1	1	1	1	0.59	0.15	0.19	0.44	0	0	0	0
ERR031696_ST1	ST1		0.73	1	1	1	1	0.35	0.27	0	0	0.15	0.68	0.59	0.74	0.3	0.38	0	0	0.1	0	0	0	0	0	0	0	0.15	0	0	0.08	0	0	0.12	0.21	0.31	0.3	0.23	0.29	0.34	0	0	0.15	0.19	0.1	0	0	0	0
ERR031697_ST1	ST1		0.73	1	1	1	1	1	0.29	0.43	0	0.15	0.68	0.59	0.74	0.3	0.38	0	0	0.1	0	0	0	0	0	0	0	0.15	0	1	1	1	1	1	1	1	1	1	1	1	1	0.59	0.15	0.19	0.44	0	0	0	0
ERR031698_ST1	ST1		0.73	1	1	1	1	1	0.29	0.43	0	0.15	0.68	0.59	0.74	0.3	0.38	0	0	0.1	0	0	0	0	0	0	0	0.15	0	1	1	1	1	1	1	1	1	1	1	1	1	0.59	0.15	0.19	0.44	0	0	0	0
ERR031700_ST1	ST1		0.73	1	1	1	1	1	0.29	0.43	0	0.15	0.68	0.59	0.74	0.3	0.38	0	0	0.1	0	0	0	0	0	0	0	0.15	0	1	1	1	1	1	1	1	1	1	1	1	1	0.59	0.15	0.19	0.44	0	0	0	0
ERR031701_ST1	ST1		0.73	1	1	1	1	1	0.29	0.43	0	0.15	0.68	0.59	0.74	0.3	0.38	0	0	0.1	0	0	0	0	0	0	0	0.15	0	1	1	1	1	1	1	1	1	1	1	1	1	0.59	0.15	0.19	0.44	0	0	0	0
ERR031702_ST1	ST1		0.73	1	1	1	1	1	0.29	0.43	0	0.15	0.68	0.59	0.74	0.3	0.38	0	0	0.1	0	0	0	0	0	0	0	0.15	0	1	1	1	1	1	1	1	1	1	1	1	1	0.59	0.15	0.19	0.44	0	0	0	0
ERR031703_ST1	ST1		0.73	1	1	1	1	1	0.29	0.43	0	0.15	0.68	0.59	0.74	0.3	0.38	0	0	0.1	0	0	0	0	0	0	0	0.15	0	1	1	1	1	1	1	1	1	1	1	1	1	0.59	0.15	0.19	0.44	0	0	0	0
ERR031704_ST1	ST1		0.73	1	1	1	1	1	0.29	0.43	0	0.15	0.68	0.59	0.74	0.3	0.38	0	0	0.1	0	0	0	0	0	0	0	0.15	0	1	1	1	1	1	1	1	1	1	1	1	1	0.59	0.15	0.19	0.44	0	0	0	0
ERR031705_ST1	ST1		0.73	1	1	1	1	1	0.29	0.43	0	0.15	0.68	0.59	0.74	0.3	0.38	0	0	0.1	0	0	0.36	0	0	0.45	0	0.15	0	1	1	1	1	1	1	1	1	1	1	1	1	0.59	0.15	0.19	0.46	0.7	0.62	0	0.5
ERR031706_ST1	ST1		0.73	1	1	1	1	1	0.29	0.43	0	0.15	0.68	0.59	0.74	0.3	0.38	0	0	0.1	0	0	0.36	0	0	0.45	0	0.15	0	1	1	1	1	1	1	1	1	1	1	1	1	0.59	0.15	0.19	0.46	0.7	0.62	0	0.5
ERR031707_ST1	ST1		0.73	1	1	1	1	1	1	1	1	1	1	1	1	1	1	1	1	1	1	0.99	1	1	1	1	1	1	1	1	1	1	1	1	1	1	1	1	1	1	1	1	1	1	1	1	0.99	0.99	1
ERR031708_ST1	ST1		0.73	1	1	1	1	1	0.29	0.43	0	0.15	0.68	0.59	0.74	0.3	0.38	0	0	0.1	0	0	0	0	0	0	0	0.15	0	1	1	1	1	1	1	1	1	1	1	1	1	0.59	0.15	0.19	0.44	0	0	0	0
ERR031709_ST1	ST1		0.73	1	1	1	1	1	0.29	0.43	0	0.15	0.68	0.59	0.74	0.3	0.38	0	0	0.1	0	0	0	0	0	0	0	0.15	0	1	1	1	1	1	1	1	1	1	1	1	1	0.59	0.15	0.19	0.44	0	0	0	0
ERR031710_ST1	ST1		0.73	1	1	1	1	1	0.29	0.43	0	0.15	0.68	0.59	0.74	0.3	0.38	0	0	0.1	0	0	0	0	0	0	0	0.15	0	1	1	1	1	1	1	1	1	1	1	1	1	0.59	0.15	0.19	0.44	0	0	0	0
ERR031711_ST1	ST1		0.73	1	1	1	1	0.35	0.27	0	0	0.15	0.68	0.59	0.74	0.3	0.38	0	0	0.1	0	0	0	0	0	0	0	0.15	0	0	0.08	0	0	0.12	0.21	0.31	0.3	0.23	0.29	0.34	0	0	0.15	0.19	0.1	0	0	0	0
ERR044801_ST1	ST1		0.73	1	1	1	1	1	0.27	0	0	0.25	0.68	0.59	0.74	0.3	0.38	0	0	0.28	0.3	0	0	0	0	0	0	0.15	0	0	0.08	0	0	0.12	0.21	0.31	0.3	0.39	0.29	0.34	1	0	0.22	0.19	0.1	0	0	0	0
ERR044802_ST1	ST1		0.73	1	1	1	1	1	0.29	0.43	0	0.15	0.68	0.59	0.74	0.3	0.38	0	0	0.1	0	0	0.33	0	0	0	0	0.15	0	1	1	1	1	1	1	1	1	1	1	1	1	1	1	1	1	1	0.99	0.99	1
ERR044803_ST1	ST1		0.73	1	1	1	1	1	0.29	0.43	0	0.15	0.68	0.59	0.74	0.3	0.38	0	0	0.1	0	0	0	0	0	0	0	0.15	0	1	1	1	1	1	1	1	1	1	1	1	1	0.59	0.15	0.19	0.44	0	0	0	0
ERR044804_ST1	ST1		0.73	1	1	1	1	1	0.29	0.43	0	0.28	0.68	0.59	0.74	0.3	0.38	0	0	0.1	0	0	0	0.14	0	0	0	0.15	0	1	1	1	1	1	1	1	1	1	1	1	1	0.59	0.15	0.19	0.44	0	0	0	0
ERR044805_ST1	ST1		0.73	1	1	1	1	1	0.29	0.43	0	0.15	0.68	0.59	0.74	0.3	0.38	0	0	0.1	0	0	0	0	0	0	0	0.15	0	1	1	1	1	1	1	1	1	1	1	1	1	0.59	0.15	0.19	0.44	0	0	0	0
ERR044806_ST1	ST1		0.73	1	1	1	1	1	0.29	0.43	0	0.15	0.68	0.59	0.74	0.3	0.38	0	0	0.1	0	0.18	0	0	0	0	0	0.15	0	1	1	1	1	1	1	1	1	1	1	1	1	0.59	0.15	0.19	0.44	0	0	0	0
ERR044807_ST1	ST1		0.73	1	1	1	1	1	0.29	0.43	0	0.15	0.68	0.59	0.74	0.3	0.38	0	0	0.1	0	0	0	0	0	0	0	0.15	0	1	1	1	1	1	1	1	1	1	1	1	1	0.59	0.15	0.19	0.44	0	0	0	0
ERR044808_ST1	ST1		0.73	1	1	1	1	1	0.29	0.43	0	0.15	0.68	0.59	0.74	0.3	0.38	0	0	0.1	0	0	0	0	0	0	0	0.15	0	1	1	1	1	1	1	1	1	1	1	1	1	0.59	0.15	0.19	0.44	0	0	0	0
ERR044809_ST1	ST1		0.73	1	1	1	1	1	0.29	0.43	0	0.15	0.68	0.59	0.74	0.3	0.38	0	0	0.1	0	0	0	0	0	0	0	0.15	0	1	1	1	1	1	1	1	1	1	1	1	1	0.59	0.15	0.19	0.44	0	0	0	0
ERR044812_ST1	ST1		0.73	1	1	1	1	1	0.29	0.43	0	0.15	0.68	0.59	0.74	0.3	0.38	0	0	0.1	0	0	0	0	0	0	0	0.15	0	1	1	1	1	1	1	1	1	1	1	1	1	0.59	0.15	0.19	0.44	0	0	0	0
ERR044813_ST1	ST1		0.73	1	1	1	1	1	1	1	1	1	1	1	1	1	1	1	1	1	1	0.99	1	1	1	1	1	1	1	1	1	1	1	1	1	1	1	1	1	1	1	1	1	1	1	1	0.99	0.99	1
ERR044814_ST1	ST1		0.73	1	1	1	1	1	0.27	0	0	0.15	0.68	0.59	0.74	0.3	0.38	0	0	0.1	0	0.18	0	0	0	0	0	0.15	0	0	0.08	0	0.05	0.12	0.21	0.31	0.3	0.23	0.29	0.34	0	0	0.15	0.19	0.1	0	0	0	0
ERR044815_ST1	ST1		0.73	1	1	1	1	1	0.26	0	0	0.15	0.68	0.59	0.74	0.3	0.38	0	0	0.1	0	0	0	0	0	0	0	0.15	0	0	0.09	0	0	0.12	0.21	0.31	0.3	0.23	0.29	0.34	0	0	0.15	0.19	0.1	0	0	0	0
ERR044816_ST1	ST1		0.73	1	1	1	1	1	0.26	0	0	0.15	0.68	0.59	0.74	0.3	0.38	0	0	0.1	0	0	0	0	0	0	0	0.15	0	0	0.08	0	0	0.12	0.21	0.31	0.3	0.23	0.29	0.34	0	0	0.15	0.19	0.1	0	0	0	0
ERR044817_ST1	ST1		0.73	1	1	1	1	1	0.26	0	0	0.15	0.68	0.59	0.74	0.3	0.38	0	0	0.1	0	0.18	0	0	0	0	0	0.15	0	0	0.08	0	0	0.12	0.21	0.31	0.3	0.23	0.29	0.34	0	0	0.15	0.19	0.1	0	0	0	0
ERR044818_ST1	ST1		0.73	1	1	1	1	1	0.27	0	0	0.15	0.68	0.59	0.74	0.3	0.38	0	0	0.1	0	0.18	0	0	0	0	0	0.15	0	0	0.08	0	0	0.12	0.21	0.31	0.3	0.23	0.29	0.34	0	0	0.15	0.19	0.1	0	0	0	0
ERR044819_ST1	ST1		0.73	1	1	1	1	1	0.29	0.43	0	0.15	0.68	0.59	0.74	0.3	0.38	0	0	0.1	0	0	0	0	0	0	0	0.15	0	1	1	1	1	1	1	1	1	1	1	1	1	0.59	0.15	0.19	0.44	0	0	0	0
ERR044820_ST1	ST1		0.73	1	1	1	1	1	0.29	0.43	0	0.15	0.68	0.59	0.74	0.3	0.38	0	0	0.1	0	0	0	0	0	0	0	0.15	0	1	1	1	1	1	1	1	1	1	1	1	1	0.59	0.15	0.19	0.44	0	0	0	0
ERR044821_ST1	ST1		0.73	1	1	1	1	1	0.29	0.43	0	0.15	0.68	0.59	0.74	0.3	0.38	0	0	0.1	0	0	0	0	0	0	0	0.15	0	1	1	1	1	1	1	1	1	1	1	1	1	0.59	0.15	0.19	0.44	0	0	0	0
ERR044822_ST1	ST1		0.73	1	1	1	1	1	0.29	0.43	0	0.15	0.68	0.59	0.74	0.3	0.38	0	0	0.1	0	0	0	0	0	0	0	0.15	0	1	1	1	1	1	1	1	1	1	1	1	1	0.59	0.15	0.19	0.44	0	0	0	0
ERR044823_ST1	ST1		0.73	1	1	1	1	1	0.29	0.43	0	0.15	0.68	0.59	0.74	0.3	0.38	0	0	0.1	0	0	0	0	0	0	0	0.15	0	1	1	1	1	1	1	1	1	1	1	1	1	0.59	0.15	0.19	0.44	0	0	0	0
ERR044824_ST1	ST1		0.73	1	1	1	1	1	0.29	0.43	0	0.15	0.68	0.59	0.74	0.3	0.38	0	0	0.1	0	0	0	0	0	0	0	0.15	0	1	1	1	1	1	1	1	1	1	1	1	1	0.59	0.15	0.19	0.44	0	0	0	0
ERR044825_ST1	ST1		0.73	1	1	1	1	1	0.29	0.43	0	0.15	0.68	0.59	0.74	0.3	0.38	0	0	0.1	0	0.18	0.33	0	0	0	0	0.15	0	1	1	1	1	1	1	1	1	1	1	1	1	1	1	1	1	1	0.99	0.99	1
ERR044826_ST1	ST1		0.73	1	1	1	1	1	0.29	0.43	0	0.22	0.88	0.86	0.94	0.96	0.93	0.87	0	0.1	0	0	0	0	0	0.44	0	0.15	0	1	1	1	1	1	1	1	1	1	1	1	1	0.59	0.15	0.19	0.44	0	0	0	0
ERR044827_ST1	ST1		0.73	1	1	1	1	1	0.29	0.43	0	0.15	0.68	0.59	0.74	0.3	0.38	0	0	0.1	0	0	0	0	0	0	0	0.15	0	1	1	1	1	1	1	1	1	1	1	1	1	0.59	0.15	0.19	0.44	0	0	0	0
ERR044828_ST1	ST1		0.73	1	1	1	1	1	0.29	0.43	0	0.15	0.68	0.59	0.74	0.3	0.38	0	0	0.1	0	0	0	0	0	0	0	0.15	0	1	1	1	1	1	1	1	1	1	1	1	1	0.59	0.15	0.19	0.44	0	0	0	0
ERR044829_ST1	ST1		0.73	1	1	1	1	1	0.29	0.43	0	0.15	0.68	0.59	0.74	0.3	0.38	0	0	0.1	0	0	0	0	0	0	0	0.15	0	1	1	1	1	0.99	1	1	1	1	1	1	1	0.59	0.15	0.19	0.44	0	0	0	0
ERR044830_ST1	ST1		0.73	1	1	1	1	1	0.29	0.43	0	0.15	0.68	0.59	0.74	0.3	0.38	0	0	0.1	0	0	0	0	0	0	0	0.15	0	1	1	1	1	1	1	1	1	1	1	1	1	0.59	0.15	0.19	0.44	0	0	0	0
ERR044831_ST1	ST1		0.73	1	1	1	1	0.98	0.27	0	0	0.15	0.68	0.59	0.74	0.3	0.38	0	0	0.1	0	0.18	0	0	0	0	0	0.15	0	0	0.08	0	0	0.12	0.21	0.31	0.3	0.23	0.29	0.34	0	0	0.15	0.19	0.1	0	0	0	0
ERR044832_ST1	ST1		0.73	1	1	1	1	1	0.29	0.43	0	0.15	0.68	0.59	0.74	0.3	0.38	0	0	0.1	0	0	0	0	0	0	0	0.15	0	1	1	1	1	1	1	1	1	1	1	1	1	0.59	0.15	0.19	0.44	0	0	0	0
ERR044833_ST1	ST1		0.73	1	1	1	1	1	0.29	0.43	0	0.15	0.68	0.59	0.74	0.3	0.38	0	0	0.1	0	0	0	0	0	0	0	0.15	0	1	1	1	1	1	1	1	1	1	1	1	1	0.59	0.15	0.19	0.44	0	0	0	0
ERR044834_ST1	ST1		0.73	1	1	1	1	1	0.29	0.43	0	0.15	0.68	0.59	0.74	0.3	0.38	0	0	0.1	0	0	0	0	0	0	0	0.15	0	1	1	1	1	0.98	1	1	1	1	1	1	1	0.59	0.15	0.19	0.44	0	0	0	0
ERR044835_ST1	ST1		0.73	1	1	1	1	1	0.29	0.43	0	0.15	0.68	0.59	0.74	0.3	0.38	0	0	0.1	0	0	0	0	0	0	0	0.15	0	1	1	1	1	1	1	1	1	1	1	1	1	0.59	0.15	0.19	0.44	0	0	0	0
ERR044837_ST1	ST1		0.73	1	1	1	1	1	0.29	0.43	0	0.15	0.68	0.59	0.74	0.3	0.38	0	0	0.1	0	0	0	0	0	0	0	0.15	0	1	1	1	1	1	1	1	1	1	1	1	1	0.59	0.15	0.19	0.44	0	0	0	0
ERR044838_ST1	ST1		0.73	1	1	1	1	1	0.29	0.43	0	0.15	0.68	0.59	0.74	0.3	0.38	0	0	0.1	0	0	0	0	0	0	0	0.15	0	1	1	1	1	1	1	1	1	1	1	1	1	0.59	0.15	0.19	0.44	0	0	0	0
ERR044839_ST1	ST1		0.73	1	1	1	1	1	0.29	0.43	0	0.15	0.68	0.59	0.74	0.3	0.38	0	0	0.1	0	0	0	0	0	0	0	0.15	0	1	1	1	1	1	1	1	1	1	1	1	1	0.59	0.15	0.19	0.44	0	0	0	0
ERR044840_ST1	ST1		0.73	1	1	1	1	1	0.29	0.43	0	0.15	0.68	0.59	0.74	0.3	0.38	0	0	0.1	0	0	0	0	0	0	0	0.15	0	1	1	1	1	1	1	1	1	1	1	1	1	0.59	0.15	0.19	0.44	0	0	0	0
ERR044841_ST1	ST1		0.73	1	1	1	1	1	0.29	0.43	0	0.15	0.68	0.59	0.74	0.3	0.38	0	0	0.1	0	0	0	0	0	0	0	0.15	0	1	1	1	1	0.97	1	1	1	1	1	1	1	0.59	0.15	0.19	0.44	0	0	0	0
ERR044842_ST1	ST1		0.73	1	1	1	1	1	0.29	0.43	0	0.15	0.68	0.59	0.74	0.3	0.38	0	0	0.1	0	0	0	0	0	0	0	0.15	0	1	1	1	1	1	1	1	1	1	1	1	1	0.59	0.15	0.19	0.44	0	0	0	0
ERR044843_ST1	ST1		0.73	1	1	1	1	1	0.29	0.43	0	0.15	0.68	0.59	0.74	0.3	0.38	0	0	0.1	0	0	0	0	0	0	0	0.15	0	1	1	1	1	1	1	1	1	1	1	1	1	0.59	0.15	0.19	0.44	0	0	0	0
ERR044844_ST1	ST1		0.73	1	1	1	1	1	0.29	0.43	0	0.15	0.68	0.59	0.74	0.3	0.38	0	0	0.1	0	0	0	0	0	0	0	0.15	0	1	1	1	1	1	1	1	1	1	1	1	1	0.59	0.15	0.19	0.44	0	0	0	0
ERR044845_ST1	ST1		0.73	1	1	1	1	1	0.29	0.43	0	0.15	0.68	0.59	0.74	0.3	0.38	0	0	0.1	0	0	0	0	0	0	0	0.15	0	1	1	1	1	1	1	1	1	1	1	1	1	0.59	0.15	0.19	0.44	0	0	0	0
ERR044847_ST1	ST1		0.73	1	1	1	1	1	0.29	0.43	0	0.15	0.68	0.59	0.74	0.3	0.38	0	0	0.1	0	0	0	0	0	0	0	0.15	0	1	1	1	1	1	1	1	1	1	1	1	1	0.59	0.15	0.19	0.44	0	0	0	0
ERR044848_ST1	ST1		0.73	1	1	1	1	1	0.29	0.43	0	0.15	0.68	0.59	0.74	0.3	0.38	0	0	0.1	0	0	0	0	0	0	0	0.15	0	1	1	1	1	1	1	1	1	1	1	1	1	0.59	0.15	0.19	0.44	0	0	0	0
ERR1256644_ST1	ST1		0.73	1	1	1	1	0.06	0.27	0	0	0.15	0.68	0.59	0.74	0.3	0.38	0	0	0.1	0	0	0	0	0	0	0	0.15	0	0	0.08	0	0	0.12	0	0.31	0.3	0.23	0.29	0.34	0	0	0.15	0.19	0.1	0	0	0	0
ERR125924_ST1	ST1		0.73	1	1	1	1	1	0.29	0.43	0	0.28	0.68	0.59	0.74	0.3	0.38	0	0	0.1	0	0	0.04	0	0	0.43	0	0.15	0	1	1	1	1	1	1	1	1	1	1	1	1	0.59	0.15	0.19	0.44	0.21	0	0	0.04
ERR125938_ST1	ST1		0.73	1	1	1	1	1	0.27	0	0	0.25	0.68	0.59	0.74	0.3	0.38	0	0	0.1	0	0	0	0	0	0	0	0.15	0	0	0.08	0	0	0.12	0.21	0.31	0.3	0.32	0.29	0.34	1	0	0.15	0.19	0.1	0	0	0	0
ERR125940_ST1	ST1		0.73	1	1	1	1	1	0.27	0	0	0.25	0.68	0.59	0.74	0.3	0.38	0	0	0.1	0	0	0	0	0	0	0	0.15	0	0	0.08	0	0	0.12	0.21	0.31	0.3	0.32	0.29	0.34	1	0	0.15	0.19	0.1	0	0	0	0
ERR125941_ST1	ST1		0.73	1	1	1	1	1	0.27	0	0	0.25	0.68	0.59	0.74	0.3	0.38	0	0	0.1	0	0	0	0	0	0	0	0.15	0	0	0.08	0	0	0.12	0.21	0.31	0.3	0.32	0.29	0.34	1	0	0.15	0.19	0.1	0	0	0	0
ERR125943_ST1	ST1		0.73	1	1	1	1	1	0.27	0	0	0.25	0.68	0.59	0.74	0.3	0.38	0	0	0.1	0	0	0	0	0	0	0	0.15	0	0	0.08	0	0	0.12	0.21	0.31	0.3	0.32	0.29	0.34	1	0	0.15	0.19	0.1	0	0	0	0
ERR125944_ST1	ST1		0.73	1	1	1	1	1	0.27	0	0	0.25	0.68	0.59	0.74	0.3	0.38	0	0	0.1	0	0	0	0	0	0	0	0.15	0	0	0.08	0	0	0.12	0.21	0.31	0.3	0.32	0.29	0.34	1	0	0.15	0.19	0.1	0	0	0	0
ERR125945_ST1	ST1		0.73	1	1	1	1	1	0.27	0	0	0.25	0.68	0.59	0.74	0.3	0.38	0	0	0.1	0	0	0	0	0	0	0	0.15	0	0	0.08	0	0	0.12	0.21	0.31	0.3	0.32	0.29	0.34	1	0	0.15	0.19	0.1	0	0	0	0
ERR125946_ST1	ST1		0.73	1	1	1	1	1	0.27	0	0	0.25	0.68	0.59	0.74	0.3	0.38	0	0	0.1	0	0.18	0	0	0	0	0	0.15	0	0	0.08	0	0	0.12	0.21	0.31	0.3	0.32	0.29	0.34	1	0	0.15	0.19	0.1	0	0	0	0
ERR125947_ST1	ST1		0.73	1	1	1	1	1	0.29	0.43	0	0.15	0.68	0.59	0.74	0.3	0.38	0	0	0.1	0	0	0	0	0	0	0	0.15	0	1	1	1	1	1	1	1	1	1	1	1	1	0.59	0.15	0.19	0.44	0	0	0	0
ERR125948_ST1	ST1		0.73	1	1	1	1	1	0.29	0.43	0	0.15	0.68	0.59	0.74	0.3	0.38	0	0	0.1	0	0	0	0	0	0	0	0.15	0	1	1	1	1	1	1	1	1	1	1	1	1	0.59	0.15	0.19	0.44	0	0	0	0
ERR125949_ST1	ST1		0.73	1	1	1	1	1	0.29	0.43	0	0.15	0.68	0.59	0.74	0.3	0.38	0	0	0.1	0	0	0	0	0	0	0	0.15	0	1	1	1	1	1	1	1	1	1	1	1	1	0.59	0.15	0.19	0.44	0	0	0	0
ERR125950_ST1	ST1		0.73	1	1	1	1	1	0.29	0.43	0	0.15	0.68	0.59	0.74	0.3	0.38	0	0	0.1	0	0	0	0	0	0	0	0.15	0	1	1	1	1	1	1	1	1	1	1	1	1	0.59	0.15	0.19	0.44	0	0	0	0
ERR125952_ST1	ST1		0.73	1	1	1	1	1	0.29	0.43	0	0.15	0.68	0.59	0.74	0.3	0.38	0	0	0.1	0	0	0	0	0	0	0	0.15	0	1	1	1	1	1	1	1	1	1	1	1	1	0.59	0.15	0.19	0.44	0	0	0	0
ERR125953_ST1	ST1		0.73	1	1	1	1	1	0.29	0.43	0	0.15	0.68	0.59	0.74	0.3	0.38	0	0	0.1	0	0	0	0	0	0	0	0.15	0	1	1	1	1	1	1	1	1	1	1	1	1	0.59	0.15	0.19	0.44	0	0	0	0
ERR125954_ST1	ST1		0.73	1	1	1	1	1	0.29	0.43	0	0.15	0.68	0.59	0.74	0.3	0.38	0	0	0.1	0	0	0	0	0	0	0	0.15	0	1	1	1	1	1	1	1	1	1	1	1	1	0.59	0.15	0.19	0.44	0	0	0	0
ERR125955_ST1	ST1		0.73	1	1	1	1	1	0.29	0.43	0	0.15	0.68	0.59	0.74	0.3	0.38	0	0	0.1	0	0	0	0	0	0	0	0.15	0	1	1	1	1	1	1	1	1	1	1	1	1	0.59	0.15	0.19	0.44	0	0	0	0
ERR125963_ST1	ST1		0.73	1	1	1	1	1	0.29	0.43	0	0.15	0.68	0.59	0.74	0.3	0.38	0	0	0.1	0	0	0.33	0	0	0	0	0.15	0	1	1	1	1	1	1	1	1	1	1	1	1	1	1	1	1	1	0.99	0.99	1
ERR125964_ST1	ST1		0.73	1	1	1	1	1	0.29	0.43	0	0.15	0.68	0.59	0.74	0.3	0.38	0	0	0.1	0	0	0	0	0	0	0	0.15	0	1	1	1	1	1	1	1	1	1	1	1	1	0.59	0.15	0.19	0.44	0	0	0	0
ERR125975_ST1	ST1		0.73	1	1	1	1	1	0.29	0.43	0	0.15	0.68	0.59	0.74	0.3	0.38	0	0	0.1	0	0	0	0	0	0	0	0.15	0	1	1	1	1	1	1	1	1	1	1	1	1	0.59	0.15	0.19	0.44	0	0	0	0
ERR125978_ST1	ST1		0.73	1	1	1	1	1	0.29	0.43	0	0.25	0.68	0.59	0.74	0.3	0.38	0	0	0.1	0	0	0.33	0.55	0.41	0	0.12	0.44	0	1	1	1	1	1	1	1	1	1	1	1	1	1	1	1	1	1	0.99	0.99	1
ERR125979_ST1	ST1		0.73	1	1	1	1	1	0.29	0.43	0	0.15	0.68	0.59	0.74	0.3	0.38	0	0	0.1	0	0	0.33	0	0	0	0	0.15	0	1	1	1	1	1	1	1	1	1	1	1	1	1	1	1	1	1	0.99	0.99	1
ERR125991_ST1	ST1		0.73	1	1	1	1	1	0.29	0.43	0	0.15	0.68	0.59	0.74	0.3	0.38	0	0	0.1	0	0	0	0	0	0	0	0.15	0	1	1	1	1	1	1	1	1	1	1	1	1	0.59	0.15	0.19	0.44	0	0	0	0
ERR125992_ST1	ST1		0.73	1	1	1	1	1	0.29	0.43	0	0.15	0.68	0.59	0.74	0.3	0.38	0	0	0.1	0	0	0	0	0	0	0	0.15	0	1	1	1	1	1	1	1	1	1	1	1	1	0.59	0.15	0.19	0.44	0	0	0	0.04
ERR1544877_ST1	ST1		0.73	1	1	1	1	1	0.24	0.43	0	0.15	0.68	0.59	0.74	0.3	0.38	0	0	0.1	0	0	0.03	0	0	0	0	0.15	0	1	1	0.77	1	0.98	1	1	0.79	1	1	1	1	0.59	0.15	0.19	0.44	0	0	0	0
ERR1544880_ST1	ST1		0.73	1	1	1	1	1	0.27	0	0	0.25	0.68	0.59	0.74	0.3	0.38	0	0	0.1	0	0	0	0	0	0	0	0.15	0	0	0.08	0	0	0.12	0.21	0.31	0.3	0.32	0.29	0.34	1	0	0.15	0.19	0.1	0	0	0	0
ERR1544881_ST1	ST1		0.73	1	1	1	1	1	0.29	0.43	0	0.15	0.68	0.59	0.74	0.3	0.38	0	0	0.1	0	0	0	0	0	0	0	0.15	0	1	1	1	1	1	1	1	1	1	0.86	0.79	1	0.59	0.15	0.19	0.44	0	0	0	0
ERR1544882_ST1	ST1		0.73	1	1	1	1	1	0.29	0.43	0	0.15	0.68	0.59	0.74	0.3	0.38	0	0	0.1	0	0	0	0	0	0	0	0.15	0	1	1	1	1	1	1	1	1	1	1	1	1	0.59	0.15	0.19	0.44	0	0	0	0
ERR1544883_ST1	ST1		0.73	1	1	1	1	1	0.27	0	0	0.25	0.68	0.59	0.74	0.3	0.38	0	0	0.1	0	0	0	0	0	0	0	0.15	0	0	0.08	0	0	0.12	0.21	0.31	0.3	0.32	0.29	0.34	1	0	0.15	0.19	0.1	0	0	0	0
ERR1544885_ST1	ST1		0.73	1	1	1	1	1	0.29	0.43	0	0.15	0.68	0.59	0.74	0.3	0.38	0	0	0.1	0	0	0	0	0	0	0	0.15	0	1	1	1	1	1	1	1	1	1	1	1	1	0.59	0.15	0.19	0.44	0	0	0	0
ERR1544888_ST1	ST1		0.73	1	1	1	1	1	0.29	0.43	0	0.15	0.68	0.59	0.74	0.3	0.38	0	0	0.1	0	0	0	0	0	0	0	0.15	0	1	1	1	1	1	1	1	1	1	1	1	1	0.59	0.15	0.19	0.44	0	0	0	0
ERR171284_ST1	ST1		0.73	1	1	1	1	1	1	1	1	1	1	1	1	1	1	1	1	1	1	0.99	1	1	1	1	1	1	1	1	1	1	1	1	1	1	1	1	1	1	1	1	1	1	1	1	0.99	0.99	1
ERR1853156_ST1	ST1		0.73	1	1	1	1	1	0.27	0	0	0.15	0.68	0.59	0.74	0.3	0.38	0	0	0.1	0	0.19	0	0	0	0	0	0.15	0	0	0.09	0	0	0.12	0.21	0.31	0.3	0.23	0.29	0.34	0	0	0.15	0.19	0.1	0	0	0	0
ERR1853181_ST1	ST1		0.73	1	1	1	1	1	0.27	0	0	0.25	0.68	0.59	0.74	0.3	0.38	0	0	0.28	0.3	0	0	0	0	0	0	0.15	0	0	0.08	0	0	0.12	0.21	0.31	0.3	0.39	0.29	0.34	1	0	0.22	0.19	0.1	0	0	0	0
ERR248711_ST1	ST1		0.73	1	1	1	1	1	0.29	0.43	0	0.15	0.68	0.59	0.74	0.3	0.38	0	0	0.1	0	0	0	0	0	0	0	0.15	0	1	1	1	1	1	1	1	1	1	1	1	1	0.59	0.15	0.19	0.44	0	0	0	0
ERR248712_ST1	ST1		0.73	1	1	1	1	1	0.29	0.43	0	0.15	0.68	0.59	0.74	0.3	0.38	0	0	0.1	0	0	0	0	0	0	0	0.15	0	1	1	1	1	1	1	1	1	1	1	1	1	0.59	0.15	0.19	0.44	0	0	0	0
ERR248713_ST1	ST1		0.73	1	1	1	1	1	0.29	0.43	0	0.15	0.68	0.59	0.74	0.3	0.38	0	0	0.1	0	0	0	0	0	0	0	0.15	0	1	1	1	1	1	1	1	1	1	1	1	1	0.59	0.15	0.19	0.44	0	0	0	0
ERR248714_ST1	ST1		0.73	1	1	1	1	1	0.29	0.43	0	0.15	0.68	0.59	0.74	0.3	0.38	0	0	0.1	0	0	0	0	0	0	0	0.15	0	1	1	1	1	1	1	1	1	1	1	1	1	0.59	0.15	0.19	0.44	0	0	0	0
ERR248716_ST1	ST1		0.73	1	1	1	1	1	0.29	0.43	0	0.15	0.68	0.59	0.74	0.3	0.38	0	0	0.1	0	0	0	0	0	0	0	0.15	0	1	1	1	1	1	1	1	1	1	1	1	1	0.59	0.15	0.19	0.44	0	0	0	0
ERR248718_ST1	ST1		0.73	1	1	1	1	1	0.29	0.43	0	0.15	0.68	0.59	0.74	0.3	0.38	0	0	0.1	0	0	0	0	0	0	0	0.15	0	1	1	1	1	1	1	1	1	1	1	1	1	0.59	0.15	0.19	0.44	0	0	0	0
ERR248719_ST1	ST1		0.73	1	1	1	1	1	0.29	0.43	0	0.15	0.68	0.59	0.74	0.3	0.38	0	0	0.1	0	0	0	0	0	0	0	0.15	0	1	1	1	1	1	1	1	1	1	1	1	1	0.59	0.15	0.19	0.44	0	0	0	0
ERR248720_ST1	ST1		0.73	1	1	1	1	1	0.29	0.43	0	0.15	0.68	0.59	0.74	0.3	0.38	0	0	0.1	0	0	0	0	0	0	0	0.15	0	1	1	1	1	1	1	1	1	1	1	1	1	0.59	0.15	0.19	0.44	0	0	0	0
ERR248721_ST1	ST1		0.73	1	1	1	1	1	0.29	0.43	0	0.15	0.68	0.59	0.74	0.3	0.38	0	0	0.1	0	0	0	0	0	0	0	0.15	0	1	1	1	1	1	1	1	1	1	1	1	1	0.59	0.15	0.19	0.44	0	0	0	0
ERR248722_ST1	ST1		0.73	1	1	1	1	1	0.29	0.43	0	0.15	0.68	0.59	0.74	0.3	0.38	0	0	0.1	0	0	0	0	0	0	0	0.15	0	1	1	1	1	1	1	1	1	1	1	1	1	0.59	0.15	0.19	0.44	0	0	0	0
ERR248723_ST1	ST1		0.73	1	1	1	1	1	0.29	0.43	0	0.15	0.68	0.59	0.74	0.3	0.38	0	0	0.1	0	0	0	0	0	0	0	0.15	0	1	1	1	1	1	1	1	1	1	1	1	1	0.59	0.15	0.19	0.44	0	0	0	0
ERR248724_ST1	ST1		0.73	1	1	1	1	1	0.29	0.43	0	0.15	0.68	0.59	0.74	0.3	0.38	0	0	0.1	0	0	0	0	0	0	0	0.15	0	1	1	1	1	1	1	1	1	1	1	1	1	0.59	0.15	0.19	0.44	0	0	0	0
ERR248725_ST1	ST1		0.73	1	1	1	1	1	0.29	0.43	0	0.15	0.68	0.59	0.74	0.3	0.38	0	0	0.1	0	0	0	0	0	0	0	0.15	0	1	1	1	1	1	1	1	1	1	1	1	1	0.59	0.15	0.19	0.44	0	0	0	0
ERR248726_ST1	ST1		0.73	1	1	1	1	1	0.29	0.43	0	0.15	0.68	0.59	0.74	0.3	0.38	0	0	0.1	0	0	0	0	0	0	0	0.15	0	1	1	1	1	1	1	1	1	1	1	1	1	0.59	0.15	0.19	0.44	0	0	0	0
ERR248727_ST1	ST1		0.73	1	1	1	1	1	0.29	0.43	0	0.15	0.68	0.59	0.74	0.3	0.38	0	0	0.1	0	0	0	0	0	0	0	0.15	0	1	1	1	1	1	1	1	1	1	1	1	1	0.59	0.15	0.19	0.44	0	0	0	0
ERR248728_ST1	ST1		0.73	1	1	1	1	1	0.29	0.43	0	0.15	0.68	0.59	0.74	0.3	0.38	0	0	0.1	0	0	0	0	0	0	0	0.15	0	1	1	1	1	1	1	1	1	1	1	1	1	0.59	0.15	0.19	0.44	0	0	0	0
ERR248729_ST1	ST1		0.73	1	1	1	1	1	0.29	0.43	0	0.15	0.68	0.59	0.74	0.3	0.38	0	0	0.1	0	0	0	0	0	0	0	0.15	0	1	1	1	1	1	1	1	1	1	1	1	1	0.59	0.15	0.19	0.44	0	0	0	0
ERR248730_ST1	ST1		0.73	1	1	1	1	1	0.29	0.43	0	0.15	0.68	0.59	0.74	0.3	0.38	0	0	0.1	0	0	0	0	0	0	0	0.15	0	1	1	1	1	1	1	1	1	1	1	1	1	0.59	0.15	0.19	0.44	0	0	0	0
ERR248731_ST1	ST1		0.73	1	1	1	1	1	0.29	0.43	0	0.15	0.68	0.59	0.74	0.3	0.38	0	0	0.1	0	0	0	0	0	0	0	0.15	0	1	1	1	1	1	1	1	1	1	1	1	1	0.59	0.15	0.19	0.44	0	0	0	0
ERR248732_ST1	ST1		0.73	1	1	1	1	1	0.29	0.43	0	0.15	0.68	0.59	0.74	0.3	0.38	0	0	0.1	0	0	0	0	0	0	0	0.15	0	1	1	1	1	1	1	1	1	1	1	1	1	0.59	0.15	0.19	0.44	0	0	0	0
ERR248733_ST1	ST1		0.73	1	1	1	1	1	0.29	0.43	0	0.15	0.68	0.59	0.74	0.3	0.38	0	0	0.1	0	0	0	0	0	0	0	0.15	0	1	1	1	1	1	1	1	1	1	1	1	1	0.59	0.15	0.19	0.44	0	0	0	0
ERR248734_ST1	ST1		0.73	1	1	1	1	1	0.29	0.43	0	0.15	0.68	0.59	0.74	0.3	0.38	0	0	0.1	0	0	0	0	0	0	0	0.15	0	1	1	1	1	1	1	1	1	1	1	1	1	0.59	0.15	0.19	0.44	0	0	0	0
ERR248735_ST1	ST1		0.73	1	1	1	1	1	0.29	0.43	0	0.15	0.68	0.59	0.74	0.3	0.38	0	0	0.1	0	0	0	0	0	0	0	0.15	0	1	1	1	1	1	1	1	1	1	1	1	1	0.59	0.15	0.19	0.44	0	0	0	0
ERR248736_ST1	ST1		0.73	1	1	1	1	1	0.29	0.43	0	0.15	0.68	0.59	0.74	0.3	0.38	0	0	0.1	0	0	0	0	0	0	0	0.15	0	1	1	1	1	1	1	1	1	1	1	1	1	0.59	0.15	0.19	0.44	0	0	0	0
ERR248737_ST1	ST1		0.73	1	1	1	1	1	0.29	0.43	0	0.15	0.68	0.59	0.74	0.3	0.38	0	0	0.1	0	0	0	0	0	0	0	0.15	0	1	1	1	1	1	1	1	1	1	1	1	1	0.59	0.15	0.19	0.44	0	0	0	0
ERR248738_ST1	ST1		0.73	1	1	1	1	1	0.29	0.43	0	0.15	0.68	0.59	0.74	0.3	0.38	0	0	0.1	0	0	0	0	0	0	0	0.15	0	1	1	1	1	1	1	1	1	1	1	1	1	0.59	0.15	0.19	0.44	0	0	0	0
ERR248739_ST1	ST1		0.73	1	1	1	1	1	0.29	0.43	0	0.15	0.68	0.59	0.74	0.3	0.38	0	0	0.1	0	0	0	0	0	0	0	0.15	0	1	1	1	1	1	1	1	1	1	1	1	1	0.59	0.15	0.19	0.44	0	0	0	0
ERR248740_ST1	ST1		0.73	1	1	1	1	1	0.29	0.43	0	0.15	0.68	0.59	0.74	0.3	0.38	0	0	0.1	0	0	0	0	0	0	0	0.15	0	1	1	1	1	1	1	1	1	1	1	1	1	0.59	0.15	0.19	0.44	0	0	0	0
ERR248741_ST1	ST1		0.73	1	1	1	1	1	0.29	0.43	0	0.15	0.68	0.59	0.74	0.3	0.38	0	0	0.1	0	0	0	0	0	0	0	0.15	0	1	1	1	1	1	1	1	1	1	1	1	1	0.59	0.15	0.19	0.44	0	0	0	0
ERR248742_ST1	ST1		0.73	1	1	1	1	1	0.29	0.43	0	0.15	0.68	0.59	0.74	0.3	0.38	0	0	0.1	0	0	0	0	0	0	0	0.15	0	1	1	1	1	1	1	1	1	1	1	1	1	0.59	0.15	0.19	0.44	0	0	0	0
ERR248743_ST1	ST1		0.73	1	1	1	1	1	0.29	0.43	0	0.15	0.68	0.59	0.74	0.3	0.38	0	0	0.1	0	0	0	0	0	0	0	0.15	0	1	1	1	1	1	1	1	1	1	1	1	1	0.59	0.15	0.19	0.44	0	0	0	0
ERR248744_ST1	ST1		0.73	1	1	1	1	1	0.29	0.43	0	0.15	0.68	0.59	0.74	0.3	0.38	0	0	0.1	0	0	0	0	0	0	0	0.15	0	1	1	1	1	1	1	1	1	1	1	1	1	0.59	0.15	0.19	0.44	0	0	0	0
ERR248745_ST1	ST1		0.73	1	1	1	1	1	0.29	0.43	0	0.15	0.68	0.59	0.74	0.3	0.38	0	0	0.1	0	0	0	0	0	0	0	0.15	0	1	1	1	1	1	1	1	1	1	1	1	1	0.59	0.15	0.19	0.44	0	0	0	0
ERR248746_ST1	ST1		0.73	1	1	1	1	1	0.29	0.43	0	0.15	0.68	0.59	0.74	0.3	0.38	0	0	0.1	0	0	0	0	0	0	0	0.15	0	1	1	1	1	1	1	1	1	1	1	1	1	0.59	0.15	0.19	0.44	0	0	0	0
ERR248747_ST1	ST1		0.73	1	1	1	1	1	0.29	0.43	0	0.15	0.68	0.59	0.74	0.3	0.38	0	0	0.1	0	0	0	0	0	0	0	0.15	0	1	1	1	1	1	1	1	1	1	1	1	1	0.59	0.15	0.19	0.44	0	0	0	0
ERR248748_ST1	ST1		0.73	1	1	1	1	1	0.29	0.43	0	0.15	0.68	0.59	0.74	0.3	0.38	0	0	0.1	0	0	0	0	0	0	0	0.15	0	1	1	1	1	1	1	1	1	1	1	1	1	0.59	0.15	0.19	0.44	0	0	0	0
ERR248749_ST1	ST1		0.73	1	1	1	1	1	0.29	0.43	0	0.15	0.68	0.59	0.74	0.3	0.38	0	0	0.1	0	0	0	0	0	0	0	0.15	0	1	1	1	1	1	1	1	1	1	1	1	1	0.59	0.15	0.19	0.44	0	0	0	0
ERR248750_ST1	ST1		0.73	1	1	1	1	1	0.29	0.43	0	0.15	0.68	0.59	0.74	0.3	0.38	0	0	0.1	0	0	0	0	0	0	0	0.15	0	1	1	1	1	1	1	1	1	1	1	1	1	0.59	0.15	0.19	0.44	0	0	0	0
ERR248751_ST1	ST1		0.73	1	1	1	1	1	0.29	0.43	0	0.15	0.68	0.59	0.74	0.3	0.38	0	0	0.1	0	0	0	0	0	0	0	0.15	0	1	1	1	1	1	1	1	1	1	1	1	1	0.59	0.15	0.19	0.44	0	0	0	0
ERR248752_ST1	ST1		0.73	1	1	1	1	1	0.29	0.43	0	0.15	0.68	0.59	0.74	0.3	0.38	0	0	0.1	0	0	0	0	0	0	0	0.15	0	1	1	1	1	1	1	1	1	1	1	1	1	0.59	0.15	0.19	0.44	0	0	0	0
ERR248753_ST1	ST1		0.73	1	1	1	1	1	0.29	0.43	0	0.15	0.68	0.59	0.74	0.3	0.38	0	0	0.1	0	0	0	0	0	0	0	0.15	0	1	1	1	1	1	1	1	1	1	1	1	1	0.59	0.15	0.19	0.44	0	0	0	0
ERR248754_ST1	ST1		0.73	1	1	1	1	1	0.29	0.43	0	0.15	0.68	0.59	0.74	0.3	0.38	0	0	0.1	0	0	0	0	0	0	0	0.15	0	1	1	1	1	1	1	1	1	1	1	1	1	0.59	0.15	0.19	0.44	0	0	0	0
ERR248755_ST1	ST1		0.73	1	1	1	1	1	0.29	0.43	0	0.15	0.68	0.59	0.74	0.3	0.38	0	0	0.1	0	0	0	0	0	0	0	0.15	0	1	1	1	1	1	1	1	1	1	1	1	1	0.59	0.15	0.19	0.44	0	0	0	0
ERR248756_ST1	ST1		0.73	1	1	1	1	1	0.29	0.43	0	0.15	0.68	0.59	0.74	0.3	0.38	0	0	0.1	0	0	0	0	0	0	0	0.15	0	1	1	1	1	1	1	1	1	1	1	1	1	0.59	0.15	0.19	0.44	0	0	0	0
ERR248757_ST1	ST1		0.73	1	1	1	1	1	0.29	0.43	0	0.15	0.68	0.59	0.74	0.3	0.38	0	0	0.1	0	0	0	0	0	0	0	0.15	0	1	1	1	1	1	1	1	1	1	1	1	1	0.59	0.15	0.19	0.44	0	0	0	0
ERR248758_ST1	ST1		0.73	1	1	1	1	1	0.29	0.43	0	0.15	0.68	0.59	0.74	0.3	0.38	0	0	0.1	0	0	0	0	0	0	0	0.15	0	1	1	1	1	1	1	1	1	1	1	1	1	0.59	0.15	0.19	0.44	0	0	0	0
ERR248759_ST1	ST1		0.73	1	1	1	1	1	0.29	0.43	0	0.15	0.68	0.59	0.74	0.3	0.38	0	0	0.1	0	0	0	0	0	0	0	0.15	0	1	1	1	1	1	1	1	1	1	1	1	1	0.59	0.15	0.19	0.44	0	0	0	0
ERR248760_ST1	ST1		0.73	1	1	1	1	1	0.29	0.43	0	0.15	0.68	0.59	0.74	0.3	0.38	0	0	0.1	0	0	0	0	0	0	0	0.27	0	1	1	1	1	1	1	1	1	1	1	1	1	0.59	0.15	0.19	0.44	0.15	0	0	0
ERR248761_ST1	ST1		0.73	1	1	1	1	1	0.29	0.43	0	0.15	0.68	0.59	0.74	0.3	0.38	0	0	0.1	0	0	0	0	0	0	0	0.15	0	1	1	1	1	1	1	1	1	1	1	1	1	0.59	0.15	0.19	0.44	0	0	0	0
ERR248762_ST1	ST1		0.73	1	1	1	1	1	0.29	0.43	0	0.15	0.68	0.59	0.74	0.3	0.38	0	0	0.1	0	0	0	0	0	0	0	0.15	0	1	1	1	1	1	1	1	1	1	1	1	1	0.59	0.15	0.19	0.44	0	0	0	0
ERR248763_ST1	ST1		0.73	1	1	1	1	1	0.29	0.43	0	0.15	0.68	0.59	0.74	0.3	0.38	0	0	0.1	0	0	0	0	0	0	0	0.15	0	1	1	1	1	1	1	1	1	1	1	1	1	0.59	0.15	0.19	0.44	0	0	0	0
ERR248764_ST1	ST1		0.73	1	1	1	1	1	0.29	0.43	0	0.15	0.68	0.59	0.74	0.3	0.38	0	0	0.1	0	0	0	0	0	0	0	0.15	0	1	1	1	1	1	1	1	1	1	1	1	1	0.59	0.15	0.19	0.44	0	0	0	0
ERR248765_ST1	ST1		0.73	1	1	1	1	1	0.29	0.43	0	0.15	0.68	0.59	0.74	0.3	0.38	0	0	0.1	0	0	0	0	0	0	0	0.15	0	1	1	1	1	1	1	1	1	1	1	1	1	0.59	0.15	0.19	0.44	0	0	0	0
ERR248766_ST1	ST1		0.73	1	1	1	1	1	0.29	0.43	0	0.15	0.68	0.59	0.74	0.3	0.38	0	0	0.1	0	0	0	0	0	0	0	0.15	0	1	1	1	1	1	1	1	1	1	1	1	1	0.59	0.15	0.19	0.44	0	0	0	0
ERR248767_ST1	ST1		0.73	1	1	1	1	1	0.29	0.43	0	0.15	0.68	0.59	0.74	0.3	0.38	0	0	0.1	0	0	0	0	0	0	0	0.15	0	1	1	1	1	1	1	1	1	1	1	1	1	0.59	0.15	0.19	0.44	0	0	0	0
ERR248768_ST1	ST1		0.73	1	1	1	1	1	0.29	0.43	0	0.15	0.68	0.59	0.74	0.3	0.38	0	0	0.1	0	0	0	0	0	0	0	0.15	0	1	1	1	1	1	1	1	1	1	1	1	1	0.59	0.15	0.19	0.44	0	0	0	0
ERR248769_ST1	ST1		0.73	1	1	1	1	1	0.29	0.43	0	0.15	0.68	0.59	0.74	0.3	0.38	0	0	0.1	0	0	0	0	0	0	0	0.15	0	1	1	1	1	0.95	0.93	1	1	1	1	1	1	0.59	0.15	0.19	0.44	0	0	0	0
ERR248770_ST1	ST1		0.73	1	1	1	1	1	0.29	0.27	0	0.15	0.68	0.59	0.74	0.3	0.38	0	0	0.1	0	0	0	0	0	0	0	0.15	0	0.69	0.69	0.32	0.5	0.5	0.35	0.35	1	1	1	1	1	0.41	0.15	0.19	0.37	0	0	0	0
ERR248771_ST1	ST1		0.73	1	1	1	1	1	0.29	0.43	0	0.15	0.68	0.59	0.74	0.3	0.38	0	0	0.1	0	0	0	0	0	0	0	0.15	0	1	1	1	1	1	1	1	1	1	1	1	1	0.59	0.15	0.19	0.44	0	0	0	0
ERR248772_ST1	ST1		0.73	1	1	1	1	1	0.29	0.43	0	0.15	0.68	0.59	0.74	0.3	0.38	0	0	0.1	0	0	0	0	0	0	0	0.15	0	1	1	0.54	1	1	0.91	1	1	1	1	1	1	0.59	0.15	0.19	0.44	0	0	0	0
ERR248773_ST1	ST1		0.73	1	1	1	1	1	0.29	0.43	0	0.15	0.68	0.59	0.74	0.3	0.38	0	0	0.1	0	0	0	0	0	0	0	0.15	0	1	1	1	1	1	1	1	1	1	1	1	1	0.59	0.15	0.19	0.44	0	0	0	0
ERR248774_ST1	ST1		0.73	1	1	1	1	1	0.29	0.43	0	0.15	0.68	0.59	0.74	0.3	0.38	0	0	0.1	0	0	0	0	0	0	0	0.15	0	1	1	1	1	1	1	1	1	1	1	1	1	0.59	0.15	0.19	0.44	0	0	0	0
ERR248775_ST1	ST1		0.73	1	1	1	1	1	0.29	0.43	0	0.15	0.68	0.59	0.74	0.3	0.38	0	0	0.1	0	0	0	0	0	0	0	0.15	0	1	1	1	1	1	0.95	1	1	1	1	1	1	0.59	0.15	0.19	0.44	0	0	0	0
ERR248776_ST1	ST1		0.73	1	1	1	1	1	0.29	0.43	0	0.15	0.68	0.59	0.74	0.3	0.38	0	0	0.1	0	0	0	0	0	0	0	0.15	0	1	1	1	1	1	1	1	1	1	1	1	1	0.59	0.15	0.19	0.44	0	0	0	0
ERR248777_ST1	ST1		0.73	1	1	1	1	1	0.29	0.43	0	0.15	0.68	0.59	0.74	0.3	0.38	0	0	0.1	0	0	0	0	0	0	0	0.15	0	1	1	0.58	1	0.54	0.46	0.4	1	1	1	1	1	0.59	0.15	0.19	0.44	0	0	0	0
ERR248778_ST1	ST1		0.73	1	1	1	1	1	0.29	0.43	0	0.15	0.68	0.59	0.74	0.3	0.38	0	0	0.1	0	0	0	0	0	0	0	0.15	0	1	1	1	1	1	0.92	1	1	1	1	1	1	0.59	0.15	0.19	0.44	0	0	0	0
ERR251715_ST1	ST1		0.73	1	1	1	1	1	0.29	0.43	0	0.15	0.68	0.59	0.74	0.3	0.38	0	0	0.1	0	0	0	0	0	0	0	0.15	0	1	1	1	1	1	1	1	1	1	1	1	1	0.59	0.15	0.19	0.44	0	0	0	0
ERR251719_ST1	ST1		0.73	1	1	1	1	1	0.29	0.43	0	0.15	0.68	0.59	0.74	0.3	0.38	0	0	0.1	0	0	0	0	0	0	0	0.15	0	1	1	1	1	1	1	1	1	1	1	1	1	0.59	0.15	0.19	0.44	0	0	0	0
ERR251725_ST1	ST1		0.73	1	1	1	1	1	0.29	0.43	0	0.15	0.68	0.59	0.74	0.3	0.38	0	0	0.1	0	0	0.33	0	0	0	0	0.15	0	1	1	1	1	1	1	1	1	1	1	1	1	1	1	1	1	1	0.99	0.99	1
ERR251729_ST1	ST1		0.73	1	1	1	1	1	0.29	0.43	0	0.15	0.68	0.59	0.74	0.3	0.38	0	0	0.1	0	0	0.33	0	0	0	0	0.15	0	1	1	1	1	1	1	1	1	1	1	1	1	1	1	1	1	1	0.99	0.99	1
ERR251730_ST1	ST1		0.73	1	1	1	1	1	0.29	0.43	0	0.15	0.68	0.59	0.74	0.3	0.38	0	0	0.1	0	0	0.33	0	0	0	0	0.15	0	1	1	1	1	1	1	1	1	1	1	1	1	1	1	1	1	1	0.99	0.99	1
ERR251732_ST1	ST1		0.73	1	1	1	1	1	0.29	0.43	0	0.15	0.68	0.59	0.74	0.3	0.38	0	0	0.1	0	0	0.33	0	0	0	0	0.15	0	1	1	1	1	1	1	1	1	1	1	1	1	1	1	1	1	1	0.99	0.99	1
ERR251734_ST1	ST1		0.73	1	1	1	1	1	0.29	0.43	0	0.25	0.68	0.59	0.74	0.3	0.38	0	0	0.1	0	0	0.32	0	0	0	0	0.15	0	1	1	1	1	1	1	1	1	1	1	1	1	1	1	1	1	1	0.99	0.99	1
ERR251740_ST1	ST1		0.73	1	1	1	1	1	0.29	0.43	0	0.15	0.68	0.59	0.74	0.3	0.38	0	0	0.1	0	0	0.33	0	0	0	0	0.15	0	1	1	1	1	1	1	1	1	1	1	1	1	1	1	1	1	1	0.99	0.99	1
ERR251742_ST1	ST1		0.73	1	1	1	1	1	0.29	0.43	0	0.15	0.68	0.59	0.74	0.3	0.38	0	0	0.1	0	0	0	0	0	0	0	0.15	0	1	1	1	1	1	1	1	1	1	1	1	1	0.59	0.15	0.19	0.44	0	0	0	0
ERR251744_ST1	ST1		0.73	1	1	1	1	1	0.29	0.43	0	0.15	0.68	0.59	0.74	0.3	0.38	0	0	0.1	0	0	0.33	0	0	0	0	0.15	0	1	1	1	1	1	1	1	1	1	1	1	1	1	1	1	1	1	0.99	0.99	1
ERR251747_ST1	ST1		0.73	1	1	1	1	1	0.29	0.43	0	0.15	0.68	0.59	0.74	0.3	0.38	0	0	0.1	0	0	0.33	0	0	0	0	0.15	0	1	1	1	1	1	1	1	1	1	1	1	1	1	1	1	1	1	0.99	0.99	1
ERR251751_ST1	ST1		0.73	1	1	1	1	1	0.29	0.43	0	0.25	0.68	0.59	0.74	0.3	0.38	0	0	0.1	0	0	0.32	0	0	0	0	0.15	0	1	1	1	1	1	1	1	1	1	1	1	1	1	1	1	1	1	0.99	0.99	1
ERR251756_ST1	ST1		0.73	1	1	1	1	1	0.29	0.43	0	0.15	0.68	0.59	0.74	0.3	0.38	0	0	0.1	0	0	0	0	0	0	0	0.15	0	1	1	1	1	1	1	1	1	1	1	1	1	0.59	0.15	0.19	0.44	0	0	0	0
ERR251757_ST1	ST1		0.73	1	1	1	1	1	0.29	0.43	0	0.15	0.68	0.59	0.74	0.3	0.38	0	0	0.1	0	0	0.04	0	0	0	0	0.15	0	1	1	1	1	1	1	1	1	1	1	1	1	0.59	0.15	0.19	0.44	0	0	0	0
ERR251758_ST1	ST1		0.73	1	1	1	1	1	0.29	0.43	0	0.15	0.68	0.59	0.74	0.3	0.38	0	0	0.1	0	0	0	0	0	0	0	0.15	0	1	1	1	1	1	1	1	1	1	1	1	1	0.59	0.15	0.19	0.44	0	0	0	0
ERR251767_ST1	ST1		0.73	1	1	1	1	1	0.29	0.43	0	0.15	0.68	0.59	0.74	0.3	0.38	0	0	0.1	0	0	0	0	0	0	0	0.15	0	1	1	1	1	1	1	1	1	1	1	1	1	0.59	0.15	0.19	0.44	0	0	0	0
ERR251768_ST1	ST1		0.73	1	1	1	1	1	0.29	0.43	0	0.15	0.68	0.59	0.74	0.3	0.38	0	0	0.1	0	0	0	0	0	0	0	0.15	0	1	1	1	1	1	1	1	1	1	1	1	1	0.59	0.15	0.19	0.44	0	0	0	0
ERR251770_ST1	ST1		0.73	1	1	1	1	1	0.29	0.43	0	0.15	0.68	0.59	0.74	0.3	0.38	0	0	0.1	0	0	0	0	0	0	0	0.15	0	1	1	1	1	1	1	1	1	1	1	1	1	0.59	0.15	0.19	0.44	0	0	0	0
ERR251775_ST1	ST1		0.73	1	1	1	1	1	0.29	0.43	0	0.15	0.68	0.59	0.74	0.3	0.38	0	0	0.1	0	0	0.33	0	0	0	0	0.15	0	1	1	1	1	1	1	1	1	1	1	1	1	1	1	1	1	1	0.99	0.99	1
ERR251776_ST1	ST1		0.73	1	1	1	1	1	0.29	0.43	0	0.15	0.68	0.59	0.74	0.3	0.38	0	0	0.1	0	0	0.33	0	0	0	0	0.15	0	1	1	1	1	1	1	1	1	1	1	1	1	1	1	1	1	1	0.99	0.99	1
ERR251785_ST1	ST1		0.73	1	1	1	1	1	0.29	0.43	0	0.15	0.68	0.59	0.74	0.3	0.38	0	0	0.1	0	0	0.33	0	0	0	0	0.15	0	1	1	1	1	1	1	1	1	1	1	1	1	1	1	1	1	1	0.99	0.99	1
ERR251790_ST1	ST1		0.73	1	1	1	1	1	0.27	0	0	0.25	0.68	0.59	0.74	0.3	0.38	0	0	0.1	0	0	0.04	0	0	0	0	0.15	0	0	0.08	0	0	0.12	0.21	0.31	0.3	0.44	0.29	0.34	0	0	0.15	0.19	0.1	0	0.25	0	0
ERR251791_ST1	ST1		0.73	1	1	1	1	1	0.27	0	0	0.15	0.68	0.59	0.74	0.3	0.38	0	0	0.1	0	0	0	0	0	0	0	0.15	0	0	0.08	0	0	0.12	0.21	0.31	0.3	0.23	0.29	0.34	0	0	0.15	0.19	0.1	0	0	0	0
ERR251805_ST1	ST1		0.73	1	1	1	1	1	0.29	0.43	0	0.15	0.68	0.59	0.74	0.3	0.38	0	0	0.1	0	0	0	0	0	0	0	0.15	0	1	1	1	1	1	1	1	1	1	1	1	1	0.59	0.15	0.19	0.44	0	0	0	0
ERR251823_ST1	ST1		0.73	1	1	1	1	1	0.29	0.43	0	0.15	0.68	0.59	0.74	0.3	0.38	0	0	0.1	0	0	0	0	0	0	0	0.15	0	1	1	1	1	1	1	1	1	1	1	1	1	0.59	0.15	0.19	0.44	0	0	0	0
ERR251829_ST1	ST1		0.73	1	1	1	1	1	0.29	0.43	0	0.24	0.68	0.59	0.74	0.3	0.38	0	0	0.1	0	0	0	0	0	0	0	0.15	0	1	1	1	1	1	1	1	1	1	1	1	1	0.59	0.15	0.19	0.44	0	0	0	0
ERR251831_ST1	ST1		0.73	1	1	1	1	1	0.29	0.43	0	0.28	0.68	0.59	0.74	0.3	0.38	0	0	0.1	0	0	0.05	0	0	0.44	0	0.15	0	1	1	1	1	1	1	1	1	1	1	1	1	0.59	0.15	0.19	0.44	0	0	0	0
ERR251834_ST1	ST1		0.73	1	1	1	1	1	0.29	0.43	0	0.25	0.68	0.59	0.74	0.3	0.38	0	0	0.1	0	0	0	0	0	0	0	0.15	0	1	1	1	1	1	1	1	1	1	1	1	1	0.59	0.15	0.19	0.44	0	0	0	0
ERR251841_ST1	ST1		0.73	1	1	1	1	1	0.29	0.43	0	0.15	0.68	0.59	0.74	0.3	0.38	0	0	0.1	0	0	0	0	0	0	0	0.15	0	1	1	1	1	1	1	1	1	1	1	1	1	0.59	0.15	0.19	0.44	0	0	0	0
ERR251857_ST1	ST1		0.73	1	1	1	1	1	0.29	0.43	0	0.15	0.68	0.59	0.74	0.3	0.38	0	0	0.1	0	0	0	0	0	0	0	0.15	0	1	1	1	1	1	1	1	1	1	1	1	1	0.59	0.15	0.19	0.44	0	0	0	0
ERR251864_ST1	ST1		0.73	1	1	1	1	1	0.29	0.43	0	0.15	0.68	0.59	0.74	0.3	0.38	0	0	0.1	0	0	0	0	0	0	0	0.15	0	1	1	1	1	1	1	1	1	1	1	1	1	0.59	0.15	0.19	0.44	0	0	0	0
ERR251867_ST1	ST1		0.73	1	1	1	1	1	0.29	0.43	0	0.17	0.68	0.59	0.74	0.3	0.38	0	0	0.1	0	0	0.33	0	0	0	0	0.15	0	1	1	1	1	1	1	1	1	1	1	1	1	1	1	1	1	1	0.99	0.99	1
ERR277253_ST1	ST1		0.73	1	1	1	1	1	0.29	0.43	0	0.15	0.68	0.59	0.74	0.3	0.38	0	0	0.1	0	0	0	0	0	0	0	0.15	0	1	1	1	1	1	1	1	1	1	1	1	1	0.59	0.15	0.19	0.44	0	0	0	0
ERR277254_ST1	ST1		0.73	1	1	1	1	1	0.29	0.43	0	0.15	0.68	0.59	0.74	0.3	0.38	0	0	0.1	0	0	0	0	0	0	0	0.15	0	1	1	1	1	1	1	1	1	1	1	1	1	0.59	0.15	0.19	0.44	0	0	0	0
ERR277256_ST1	ST1		0.73	1	1	1	1	1	0.29	0.43	0	0.15	0.68	0.59	0.74	0.3	0.38	0	0	0.1	0	0	0	0	0	0	0	0.15	0	1	1	1	1	1	1	1	1	1	1	1	1	0.59	0.15	0.19	0.44	0	0	0	0
ERR277258_ST1	ST1		0.73	1	1	1	1	1	0.29	0.43	0	0.15	0.68	0.59	0.74	0.3	0.38	0	0	0.1	0	0	0	0	0	0	0	0.15	0	1	1	1	1	1	1	1	1	1	1	1	1	0.59	0.15	0.19	0.44	0	0	0	0
ERR277259_ST1	ST1		0.73	1	1	1	1	1	0.29	0.43	0	0.15	0.68	0.59	0.74	0.3	0.38	0	0	0.1	0	0	0	0	0	0	0	0.15	0	1	1	1	1	1	1	1	1	1	1	1	1	0.59	0.15	0.19	0.44	0	0	0	0
ERR277260_ST1	ST1		0.73	1	1	1	1	1	0.29	0.43	0	0.15	0.68	0.59	0.74	0.3	0.38	0	0	0.1	0	0	0	0	0	0	0	0.15	0	1	1	1	1	1	1	1	1	1	1	1	1	0.59	0.15	0.19	0.44	0	0	0	0
ERR277262_ST1	ST1		0.73	1	1	1	1	1	0.29	0.43	0	0.15	0.68	0.59	0.74	0.3	0.38	0	0	0.1	0	0	0	0	0	0	0	0.15	0	1	1	1	1	1	1	1	1	1	1	1	1	0.59	0.15	0.19	0.44	0	0	0	0
ERR277264_ST1	ST1		0.73	1	1	1	1	1	0.29	0.43	0	0.15	0.68	0.59	0.74	0.3	0.38	0	0	0.1	0	0	0	0	0	0	0	0.15	0	1	1	1	1	1	1	1	1	1	1	1	1	0.59	0.15	0.19	0.44	0	0	0	0
ERR277271_ST1	ST1		0.73	1	1	1	1	1	0.29	0.43	0	0.2	0.68	0.59	0.74	0.3	0.38	0	0	0.1	0	0	0	0	0	0	0	0.15	0	1	1	1	1	1	1	1	1	1	1	1	1	0.59	0.15	0.19	0.44	0	0	0	0
ERR339502_ST1	ST1		0.73	1	1	1	1	1	0.29	0.43	0	0.15	0.68	0.59	0.74	0.3	0.38	0	0	0.1	0	0	0	0	0	0	0	0.15	0	1	1	1	1	1	1	1	1	1	1	1	1	0.59	0.15	0.19	0.44	0	0	0	0
ERR339517_ST1	ST1		0.73	1	1	1	1	1	0.29	0.43	0	0.15	0.68	0.59	0.74	0.3	0.38	0	0	0.1	0	0	0	0	0	0	0	0.15	0	1	1	1	1	1	1	1	1	1	1	1	1	0.59	0.15	0.19	0.44	0	0	0	0
ERR339518_ST1	ST1		0.73	1	1	1	1	1	0.29	0.43	0	0.23	0.68	0.59	0.74	0.3	0.38	0	0	0.1	0	0	0	0	0	0.2	0	0.15	0	1	1	1	1	1	1	1	1	1	1	1	1	0.59	0.15	0.2	0.44	0	0	0	0
ERR339520_ST1	ST1		0.73	1	1	1	1	1	0.29	0.43	0	0.15	0.68	0.59	0.74	0.3	0.38	0	0	0.1	0	0	0	0	0	0	0	0.15	0	1	1	1	1	1	1	1	1	1	1	1	1	0.59	0.15	0.19	0.44	0	0	0	0
ERR339521_ST1	ST1		0.73	1	1	1	1	1	0.29	0.43	0	0.15	0.68	0.59	0.74	0.3	0.38	0	0	0.1	0	0	0	0	0	0	0	0.15	0	1	1	1	1	1	1	1	1	1	1	1	1	0.59	0.15	0.19	0.44	0	0	0	0
ERR339523_ST1	ST1		0.73	1	1	1	1	1	0.29	0.43	0	0.15	0.68	0.59	0.74	0.3	0.38	0	0	0.1	0	0	0	0	0	0	0	0.15	0	1	1	1	1	1	1	1	1	1	1	1	1	0.59	0.15	0.19	0.44	0	0	0	0
ERR339525_ST1	ST1		0.73	1	1	1	1	1	0.29	0.43	0	0.15	0.68	0.59	0.74	0.3	0.38	0	0	0.1	0	0	0	0	0	0	0	0.15	0	1	1	1	1	1	1	1	1	1	1	1	1	0.59	0.15	0.19	0.44	0	0	0	0
ERR339526_ST1	ST1		0.73	1	1	1	1	1	0.29	0.43	0	0.17	0.68	0.59	0.74	0.3	0.38	0	0	0.18	0.3	0	0	0	0	0	0	0.15	0	1	1	1	1	1	1	1	1	1	1	1	1	0.59	0.15	0.19	0.44	0	0	0	0
ERR339527_ST1	ST1		0.73	1	1	1	1	1	0.29	0.43	0	0.15	0.68	0.59	0.74	0.3	0.38	0	0	0.1	0	0	0.33	0	0	0	0	0.15	0	1	1	1	1	1	1	1	1	1	1	1	1	1	1	1	1	1	0.99	0.99	1
ERR339528_ST1	ST1		0.73	1	1	1	1	1	0.29	0.43	0	0.15	0.68	0.59	0.74	0.3	0.38	0	0	0.1	0	0	0.33	0	0	0	0	0.15	0	1	1	1	1	1	1	1	1	1	1	1	1	1	1	1	1	1	0.99	0.99	1
ERR339529_ST1	ST1		0.73	1	1	1	1	1	0.29	0.43	0	0.15	0.68	0.59	0.74	0.3	0.38	0	0	0.1	0	0	0	0	0	0	0	0.15	0	1	1	1	1	1	1	1	1	1	1	1	1	0.59	0.15	0.19	0.44	0	0	0	0
ERR339530_ST1	ST1		0.73	1	1	1	1	1	0.29	0.43	0	0.15	0.68	0.59	0.74	0.3	0.38	0	0	0.1	0	0	0	0	0	0	0	0.15	0	1	1	1	1	1	1	1	1	1	1	1	1	0.59	0.15	0.19	0.44	0	0	0	0
ERR339535_ST1	ST1		0.73	1	1	1	1	1	0.29	0.43	0	0.15	0.68	0.59	0.74	0.3	0.38	0	0	0.1	0	0	0.33	0	0	0	0	0.15	0	1	1	1	1	1	1	1	1	1	1	1	1	1	1	1	1	1	0.99	0.99	1
ERR339538_ST1	ST1		0.73	1	1	1	1	1	0.29	0.43	0	0.15	0.68	0.59	0.74	0.3	0.38	0	0	0.1	0	0	0	0	0	0	0	0.15	0	1	1	1	1	1	1	1	1	1	1	1	1	0.59	0.15	0.19	0.44	0	0	0	0
ERR339539_ST1	ST1		0.73	1	1	1	1	1	0.29	0.43	0	0.15	0.68	0.59	0.74	0.3	0.38	0	0	0.1	0	0	0	0	0	0	0	0.15	0	1	1	1	1	1	1	1	1	1	1	1	1	0.59	0.15	0.19	0.44	0	0	0	0
ERR339670_ST1	ST1		0.73	1	1	1	1	1	0.29	0.43	0	0.15	0.68	0.59	0.74	0.3	0.38	0	0	0.1	0	0	0	0	0	0	0	0.15	0	1	1	1	1	1	1	1	1	1	1	1	1	0.59	0.15	0.19	0.44	0	0	0	0
ERR339674_ST1	ST1		0.73	1	1	1	1	1	0.29	0.43	0	0.15	0.68	0.59	0.74	0.3	0.38	0	0	0.1	0	0	0.33	0	0	0	0	0.15	0	1	1	1	1	1	1	1	1	1	1	1	1	1	1	1	1	1	0.99	0.99	1
ERR339676_ST1	ST1		0.73	1	1	1	1	1	0.29	0.43	0	0.15	0.68	0.59	0.74	0.3	0.38	0	0	0.1	0	0	0	0	0	0	0	0.15	0	1	1	1	1	1	1	1	1	1	1	1	1	0.59	0.15	0.19	0.44	0	0	0	0
ERR339680_ST1	ST1		0.73	1	1	1	1	1	0.29	0.43	0	0.15	0.68	0.59	0.74	0.3	0.38	0	0	0.1	0	0	0.33	0	0	0	0	0.15	0	1	1	1	1	1	1	1	1	1	1	1	1	1	1	1	1	1	0.99	0.99	1
ERR339684_ST1	ST1		0.73	1	1	1	1	1	0.29	0.43	0	0.15	0.68	0.59	0.74	0.3	0.38	0	0	0.1	0	0	0	0	0	0	0	0.15	0	1	1	1	1	1	1	1	1	1	1	1	1	0.59	0.15	0.19	0.44	0	0	0	0
ERR339688_ST1	ST1		0.73	1	1	1	1	1	0.29	0.43	0	0.15	0.68	0.59	0.74	0.3	0.38	0	0	0.1	0	0	0	0	0	0	0	0.15	0	1	1	1	1	1	1	1	1	1	1	1	1	0.59	0.15	0.19	0.44	0	0	0	0
ERR339699_ST1	ST1		0.73	1	1	1	1	1	0.29	0.43	0	0.15	0.68	0.59	0.74	0.3	0.38	0	0	0.1	0	0	0	0	0	0	0	0.15	0	1	1	1	1	1	1	1	1	1	1	1	1	0.59	0.15	0.19	0.44	0	0	0	0
ERR339702_ST1	ST1		0.73	1	1	1	1	1	0.29	0.43	0	0.15	0.68	0.59	0.74	0.3	0.38	0	0	0.1	0	0	0.33	0	0	0	0	0.15	0	1	1	1	1	1	1	1	1	1	1	1	1	1	1	1	1	1	0.99	0.99	1
ERR339709_ST1	ST1		0.73	1	1	1	1	1	0.29	0.43	0	0.15	0.68	0.59	0.74	0.3	0.38	0	0	0.1	0	0	0.33	0	0	0	0	0.15	0	1	1	1	1	1	1	1	1	1	1	1	1	1	1	1	1	1	0.99	0.99	1
ERR339711_ST1	ST1		0.73	1	1	1	1	1	0.29	0.43	0	0.15	0.68	0.59	0.74	0.3	0.38	0	0	0.1	0	0	0	0	0	0	0	0.15	0	1	1	1	1	1	1	1	1	1	1	1	1	0.59	0.15	0.19	0.44	0	0	0	0
ERR339713_ST1	ST1		0.73	1	1	1	1	1	0.29	0.43	0	0.15	0.68	0.59	0.74	0.3	0.38	0	0	0.1	0	0	0	0	0	0	0	0.15	0	1	1	1	1	1	1	1	1	1	1	1	1	0.59	0.15	0.19	0.44	0	0	0	0
ERR339714_ST1	ST1		0.73	1	1	1	1	1	0.29	0.43	0	0.15	0.68	0.59	0.74	0.3	0.38	0	0	0.1	0	0	0	0	0	0	0	0.15	0	1	1	1	1	1	1	1	1	1	1	1	1	0.59	0.15	0.19	0.44	0	0	0	0
ERR339715_ST1	ST1		0.73	1	1	1	1	1	0.29	0.43	0	0.15	0.68	0.59	0.74	0.3	0.38	0	0	0.1	0	0	0	0	0	0	0	0.15	0	1	1	1	1	1	1	1	1	1	1	1	1	0.59	0.15	0.19	0.44	0	0	0	0
ERR339749_ST1	ST1		0.73	1	1	1	1	1	0.29	0.43	0	0.15	0.68	0.59	0.74	0.3	0.38	0	0	0.1	0	0	0.33	0	0	0	0	0.15	0	1	1	1	1	1	1	1	1	1	1	1	1	1	1	1	1	1	0.99	0.99	1
ERR339750_ST1	ST1		0.73	1	1	1	1	1	0.29	0.43	0	0.15	0.68	0.59	0.74	0.3	0.38	0	0	0.1	0	0	0.04	0	0	0	0	0.15	0	1	1	1	1	1	1	1	1	1	1	1	1	0.59	0.15	0.19	0.44	0	0	0	0
ERR339751_ST1	ST1		0.73	1	1	1	1	1	0.29	0.43	0	0.15	0.68	0.59	0.74	0.3	0.38	0	0	0.1	0	0	0	0	0	0	0	0.15	0	1	1	1	1	1	1	1	1	1	1	1	1	0.59	0.15	0.19	0.44	0	0	0	0
ERR339752_ST1	ST1		0.73	1	1	1	1	1	0.29	0.43	0	0.15	0.68	0.59	0.74	0.3	0.38	0	0	0.1	0	0	0	0	0	0	0	0.15	0	1	1	1	1	1	1	1	1	1	1	1	1	0.59	0.15	0.19	0.44	0	0	0	0
ERR339753_ST1	ST1		0.73	1	1	1	1	1	0.29	0.43	0	0.15	0.68	0.59	0.74	0.3	0.38	0	0	0.1	0	0	0.33	0	0	0	0	0.15	0	1	1	1	1	1	1	1	1	1	1	1	1	1	1	1	1	1	0.99	0.99	1
ERR339754_ST1	ST1		0.73	1	1	1	1	1	0.29	0.43	0	0.15	0.68	0.59	0.74	0.3	0.38	0	0	0.1	0	0	0	0	0	0	0	0.15	0	1	1	1	1	1	1	1	1	1	1	1	1	0.59	0.15	0.19	0.44	0	0	0	0
ERR339755_ST1	ST1		0.73	1	1	1	1	1	0.29	0.43	0	0.15	0.68	0.59	0.74	0.3	0.38	0	0	0.1	0	0	0.33	0	0	0	0	0.15	0	1	1	1	1	1	1	1	1	1	1	1	1	1	1	1	1	1	0.99	0.99	1
ERR339756_ST1	ST1		0.73	1	1	1	1	1	0.29	0.43	0	0.15	0.68	0.59	0.74	0.3	0.38	0	0	0.1	0	0	0.33	0	0	0	0	0.15	0	1	1	1	1	1	1	1	1	1	1	1	1	1	1	1	1	1	0.99	0.99	1
ERR339757_ST1	ST1		0.73	1	1	1	1	1	0.29	0.43	0	0.15	0.68	0.59	0.74	0.3	0.38	0	0	0.1	0	0	0	0	0	0	0	0.15	0	1	1	1	1	1	1	1	1	1	1	1	1	0.59	0.15	0.19	0.44	0	0	0	0
ERR339758_ST1	ST1		0.73	1	1	1	1	1	0.29	0.43	0	0.15	0.68	0.59	0.74	0.3	0.38	0	0	0.1	0	0	0	0	0	0	0	0.15	0	1	1	1	1	1	1	1	1	1	1	1	1	0.59	0.15	0.19	0.44	0	0	0	0
ERR339759_ST1	ST1		0.73	1	1	1	1	1	0.29	0.43	0	0.15	0.68	0.59	0.74	0.3	0.38	0	0	0.1	0	0	0	0	0	0	0	0.15	0	1	1	1	1	1	1	1	1	1	1	1	1	0.59	0.15	0.19	0.44	0	0	0	0
ERR339760_ST1	ST1		0.73	1	1	1	1	1	0.29	0.43	0	0.15	0.68	0.59	0.74	0.3	0.38	0	0	0.1	0	0	0	0	0	0	0	0.15	0	1	1	1	1	1	1	1	1	1	1	1	1	0.59	0.15	0.19	0.44	0	0	0	0
ERR339762_ST1	ST1		0.73	1	1	1	1	1	0.29	0.43	0	0.15	0.68	0.59	0.74	0.3	0.38	0	0	0.1	0	0	0	0	0	0	0	0.15	0	1	1	1	1	1	1	1	1	1	1	1	1	0.59	0.15	0.19	0.44	0	0	0	0
ERR339763_ST1	ST1		0.73	1	1	1	1	1	0.29	0.43	0	0.15	0.68	0.59	0.74	0.3	0.38	0	0	0.1	0	0	0.33	0	0	0	0	0.15	0	1	1	1	1	1	1	1	1	1	1	1	1	1	1	1	1	1	0.99	0.99	1
ERR339764_ST1	ST1		0.73	1	1	1	1	1	0.29	0.43	0	0.15	0.68	0.59	0.74	0.3	0.38	0	0	0.1	0	0	0	0	0	0	0	0.15	0	1	1	1	1	1	1	1	1	1	1	1	1	0.59	0.15	0.19	0.44	0	0	0	0
ERR339765_ST1	ST1		0.73	1	1	1	1	1	0.29	0.43	0	0.15	0.68	0.59	0.74	0.3	0.38	0	0	0.1	0	0	0	0	0	0	0	0.15	0	1	1	1	1	1	1	1	1	1	1	1	1	0.59	0.15	0.19	0.44	0	0	0	0
ERR339767_ST1	ST1		0.73	1	1	1	1	1	0.29	0.43	0	0.15	0.68	0.59	0.74	0.3	0.38	0	0	0.1	0	0	0.33	0	0	0	0	0.15	0	1	1	1	1	1	1	1	1	1	1	1	1	1	1	1	1	1	0.99	0.99	1
ERR339768_ST1	ST1		0.73	1	1	1	1	1	0.29	0.43	0	0.15	0.68	0.59	0.74	0.3	0.38	0	0	0.1	0	0	0	0	0	0	0	0.15	0	1	1	1	1	1	1	1	1	1	1	1	1	0.59	0.15	0.19	0.44	0	0	0	0
ERR339769_ST1	ST1		0.73	1	1	1	1	1	0.29	0.43	0	0.17	0.68	0.59	0.74	0.3	0.38	0	0	0.1	0	0	0.33	0	0	0	0	0.15	0	1	1	1	1	1	1	1	1	1	1	1	1	1	1	1	1	1	0.99	0.99	1
ERR339770_ST1	ST1		0.73	1	1	1	1	1	0.29	0.43	0	0.15	0.68	0.59	0.74	0.3	0.38	0	0	0.1	0	0	0	0	0	0	0	0.15	0	1	1	1	1	1	1	1	1	1	1	1	1	0.59	0.15	0.19	0.44	0	0	0	0
ERR339772_ST1	ST1		0.73	1	1	1	1	1	0.29	0.43	0	0.15	0.68	0.59	0.74	0.3	0.38	0	0	0.1	0	0	0	0	0	0	0	0.15	0	1	1	1	1	1	1	1	1	1	1	1	1	0.59	0.15	0.19	0.44	0	0	0	0
ERR339773_ST1	ST1		0.73	1	1	1	1	1	0.29	0.43	0	0.15	0.68	0.59	0.74	0.3	0.38	0	0	0.1	0	0	0.33	0	0	0	0	0.15	0	1	1	1	1	1	1	1	1	1	1	1	1	1	1	1	1	1	0.99	0.99	1
ERR339774_ST1	ST1		0.73	1	1	1	1	1	0.29	0.43	0	0.15	0.68	0.59	0.74	0.3	0.38	0	0	0.1	0	0	0	0	0	0	0	0.15	0	1	1	1	1	1	1	1	1	1	1	1	1	0.59	0.15	0.19	0.44	0	0	0	0
ERR339776_ST1	ST1		0.73	1	1	1	1	1	0.29	0.43	0	0.15	0.68	0.59	0.74	0.3	0.38	0	0	0.1	0	0	0.33	0	0	0	0	0.15	0	1	1	1	1	1	1	1	1	1	1	1	1	1	1	1	1	1	0.99	0.99	1
ERR339777_ST1	ST1		0.73	1	1	1	1	1	0.29	0.43	0	0.15	0.68	0.59	0.74	0.3	0.38	0	0	0.1	0	0	0	0	0	0	0	0.15	0	1	1	1	1	1	1	1	1	1	1	1	1	0.59	0.15	0.19	0.44	0	0	0	0
ERR339779_ST1	ST1		0.73	1	1	1	1	1	0.29	0.43	0	0.15	0.68	0.59	0.74	0.3	0.38	0	0	0.1	0	0	0	0	0	0	0	0.15	0	1	1	1	1	1	1	1	1	1	1	1	1	0.59	0.15	0.19	0.44	0	0	0	0
ERR339780_ST1	ST1		0.73	1	1	1	1	1	0.29	0.43	0	0.15	0.68	0.59	0.74	0.3	0.38	0	0	0.1	0	0	0	0	0	0	0	0.15	0	1	1	1	1	1	1	1	1	1	1	1	1	0.59	0.15	0.19	0.44	0	0	0	0
ERR339781_ST1	ST1		0.73	1	1	1	1	1	0.29	0.43	0	0.15	0.68	0.59	0.74	0.3	0.38	0	0	0.1	0	0	0	0	0	0	0	0.15	0	1	1	1	1	1	1	1	1	1	1	1	1	0.59	0.15	0.19	0.44	0	0	0	0
ERR339782_ST1	ST1		0.73	1	1	1	1	1	0.29	0.43	0	0.15	0.68	0.59	0.74	0.3	0.38	0	0	0.1	0	0	0	0	0	0	0	0.15	0	1	1	1	1	1	1	1	1	1	1	1	1	0.59	0.15	0.19	0.44	0	0	0	0
ERR339783_ST1	ST1		0.73	1	1	1	1	1	0.29	0.43	0	0.15	0.68	0.59	0.74	0.3	0.38	0	0	0.1	0	0	0	0	0	0	0	0.15	0	1	1	1	1	1	1	1	1	1	1	1	1	0.59	0.15	0.19	0.44	0	0	0	0
ERR339784_ST1	ST1		0.73	1	1	1	1	1	0.29	0.43	0	0.15	0.68	0.59	0.74	0.3	0.38	0	0	0.1	0	0	0	0	0	0	0	0.15	0	1	1	1	1	1	1	1	1	1	1	1	1	0.59	0.15	0.19	0.44	0	0	0	0
ERR339786_ST1	ST1		0.73	1	1	1	1	1	0.29	0.43	0	0.15	0.68	0.59	0.74	0.3	0.38	0	0	0.1	0	0	0.33	0	0	0	0	0.15	0	1	1	1	1	1	1	1	1	1	1	1	1	1	1	1	1	1	0.99	0.99	1
ERR339787_ST1	ST1		0.73	1	1	1	1	1	0.29	0.43	0	0.15	0.68	0.59	0.74	0.3	0.38	0	0	0.1	0	0	0	0	0	0	0	0.15	0	1	1	1	1	1	1	1	1	1	1	1	1	0.59	0.15	0.19	0.44	0	0	0	0
ERR339790_ST1	ST1		0.73	1	1	1	1	1	0.29	0.43	0	0.15	0.68	0.59	0.74	0.3	0.38	0	0	0.1	0	0	0	0	0	0	0	0.15	0	1	1	1	1	1	1	1	1	1	1	1	1	0.59	0.15	0.19	0.44	0	0	0	0
ERR339791_ST1	ST1		0.73	1	1	1	1	1	0.29	0.43	0	0.15	0.68	0.59	0.74	0.3	0.38	0	0	0.1	0	0	0	0	0	0	0	0.15	0	1	1	1	1	1	1	1	1	1	1	1	1	0.59	0.15	0.19	0.44	0	0	0	0
ERR339792_ST1	ST1		0.73	1	1	1	1	1	0.29	0.43	0	0.15	0.68	0.59	0.74	0.3	0.38	0	0	0.1	0	0	0	0	0	0	0	0.15	0	1	1	1	1	1	1	1	1	1	1	1	1	0.59	0.15	0.19	0.44	0	0	0	0
ERR339793_ST1	ST1		0.73	1	1	1	1	1	0.29	0.43	0	0.15	0.68	0.59	0.74	0.3	0.38	0	0	0.1	0	0	0	0	0	0	0	0.15	0	1	1	1	1	1	1	1	1	1	1	1	1	0.59	0.15	0.19	0.44	0	0	0	0
ERR339794_ST1	ST1		0.73	1	1	1	1	1	0.29	0.43	0	0.15	0.68	0.59	0.74	0.3	0.38	0	0	0.1	0	0	0	0	0	0	0	0.15	0	1	1	1	1	1	1	1	1	1	1	1	1	0.59	0.15	0.19	0.44	0	0	0	0
ERR339795_ST1	ST1		0.73	1	1	1	1	1	0.29	0.43	0	0.15	0.68	0.59	0.74	0.3	0.38	0	0	0.1	0	0	0	0	0	0	0	0.15	0	1	1	1	1	1	1	1	1	1	1	1	1	0.59	0.15	0.19	0.44	0	0	0	0
ERR339797_ST1	ST1		0.73	1	1	1	1	1	0.29	0.43	0	0.15	0.68	0.59	0.74	0.3	0.38	0	0	0.1	0	0	0	0	0	0	0	0.15	0	1	1	1	1	1	1	1	1	1	1	1	1	0.59	0.15	0.19	0.44	0	0	0	0
ERR339798_ST1	ST1		0.73	1	1	1	1	1	0.29	0.43	0	0.15	0.68	0.59	0.74	0.3	0.38	0	0	0.1	0	0	0	0	0	0	0	0.15	0	1	1	1	1	1	1	1	1	1	1	1	1	0.59	0.15	0.19	0.44	0	0	0	0
ERR339800_ST1	ST1		0.73	1	1	1	1	1	0.29	0.43	0	0.15	0.68	0.59	0.74	0.3	0.38	0	0	0.1	0	0	0	0	0	0	0	0.15	0	1	1	1	1	1	1	1	1	1	1	1	1	0.59	0.15	0.19	0.44	0	0	0	0
ERR339826_ST1	ST1		0.73	1	1	1	1	1	0.29	0.43	0	0.15	0.68	0.59	0.74	0.3	0.38	0	0	0.1	0	0	0	0	0	0	0	0.15	0	1	1	1	1	1	1	1	1	1	1	1	1	0.59	0.15	0.19	0.44	0	0	0	0
ERR339827_ST1	ST1		0.73	1	1	1	1	1	0.29	0.43	0	0.15	0.68	0.59	0.74	0.3	0.38	0	0	0.1	0	0	0	0	0	0	0	0.15	0	1	1	1	1	1	1	1	1	1	1	1	1	0.59	0.15	0.19	0.44	0	0	0	0
ERR339828_ST1	ST1		0.73	1	1	1	1	1	0.29	0.43	0	0.15	0.68	0.59	0.74	0.3	0.38	0	0	0.1	0	0	0	0	0	0	0	0.15	0	1	1	1	1	1	1	1	1	1	1	1	1	0.59	0.15	0.19	0.44	0	0	0	0
ERR339829_ST1	ST1		0.73	1	1	1	1	1	0.29	0.43	0	0.15	0.68	0.59	0.74	0.3	0.38	0	0	0.1	0	0	0.33	0	0	0	0	0.15	0	1	1	1	1	1	1	1	1	1	1	1	1	1	1	1	1	1	0.99	0.99	1
ERR339830_ST1	ST1		0.73	1	1	1	1	1	0.27	0	0	0.15	0.68	0.59	0.74	0.3	0.38	0	0	0.1	0	0	0	0	0	0	0	0.15	0	0	0.08	0.36	0	0.12	0.21	0.31	0.3	0.23	0.29	0.34	0	0	0.15	0.19	0.1	0	0	0	0
ERR339831_ST1	ST1		0.73	1	1	1	1	1	0.29	0.43	0	0.15	0.68	0.59	0.74	0.3	0.38	0	0	0.1	0	0	0	0	0	0	0	0.15	0	1	1	1	1	1	1	1	1	1	1	1	1	0.59	0.15	0.19	0.44	0	0	0	0
ERR339832_ST1	ST1		0.73	1	1	1	1	1	0.29	0.43	0	0.15	0.68	0.59	0.74	0.3	0.38	0	0	0.1	0	0	0	0	0	0	0	0.15	0	1	1	1	1	1	1	1	1	1	1	1	1	0.59	0.15	0.19	0.44	0	0	0	0
ERR339833_ST1	ST1		0.73	1	1	1	1	1	0.29	0.43	0	0.15	0.68	0.59	0.74	0.3	0.38	0	0	0.1	0	0	0	0	0	0	0	0.15	0	1	1	1	1	1	1	1	1	1	1	1	1	0.59	0.15	0.19	0.44	0	0	0	0
ERR339834_ST1	ST1		0.73	1	1	1	1	1	0.29	0.43	0	0.15	0.68	0.59	0.74	0.3	0.38	0	0	0.1	0	0	0	0	0	0	0	0.15	0	1	1	1	1	1	1	1	1	1	1	1	1	0.59	0.15	0.19	0.44	0	0	0	0
ERR339835_ST1	ST1		0.73	1	1	1	1	1	0.29	0.43	0	0.15	0.68	0.59	0.74	0.3	0.38	0	0	0.1	0	0	0	0	0	0	0	0.15	0	1	1	1	1	1	1	1	1	1	1	1	1	0.59	0.15	0.19	0.44	0	0	0	0
ERR339836_ST1	ST1		0.73	1	1	1	1	1	0.29	0.43	0	0.15	0.68	0.59	0.74	0.3	0.38	0	0	0.1	0	0	0.33	0	0	0	0	0.15	0	1	1	1	1	1	1	1	1	1	1	1	1	1	1	1	1	1	0.99	0.99	1
ERR339837_ST1	ST1		0.73	1	1	1	1	1	0.29	0.43	0	0.15	0.68	0.59	0.74	0.3	0.38	0	0	0.1	0	0	0	0	0	0	0	0.15	0	1	1	1	1	1	1	1	1	1	1	1	1	0.59	0.15	0.19	0.44	0	0	0	0
ERR339838_ST1	ST1		0.73	1	1	1	1	1	0.29	0.43	0	0.15	0.68	0.59	0.74	0.3	0.38	0	0	0.1	0	0	0	0	0	0	0	0.15	0	1	1	1	1	1	1	1	1	1	1	1	1	0.59	0.15	0.19	0.44	0	0	0	0
ERR339839_ST1	ST1		0.73	1	1	1	1	1	0.29	0.43	0	0.15	0.68	0.59	0.74	0.3	0.38	0	0	0.1	0	0	0.33	0	0	0	0	0.15	0	1	1	1	1	1	1	1	1	1	1	1	1	1	1	1	1	1	0.99	0.99	1
ERR339840_ST1	ST1		0.73	1	1	1	1	1	0.29	0.43	0	0.15	0.68	0.59	0.74	0.3	0.38	0	0	0.1	0	0	0	0	0	0	0	0.15	0	1	1	1	1	1	1	1	1	1	1	1	1	0.59	0.15	0.19	0.44	0	0	0	0
ERR339841_ST1	ST1		0.73	1	1	1	1	1	0.29	0.43	0	0.15	0.68	0.59	0.74	0.3	0.38	0	0	0.1	0	0	0	0	0	0	0	0.15	0	1	1	1	1	1	1	1	1	1	1	1	1	0.59	0.15	0.19	0.44	0	0	0	0
ERR339842_ST1	ST1		0.73	1	1	1	1	1	0.29	0.43	0	0.15	0.68	0.59	0.74	0.3	0.38	0	0	0.1	0	0	0	0	0	0	0	0.15	0	1	1	1	1	1	1	1	1	1	1	1	1	0.59	0.15	0.19	0.44	0	0	0	0
ERR339843_ST1	ST1		0.73	1	1	1	1	1	0.29	0.43	0	0.15	0.68	0.59	0.74	0.3	0.38	0	0	0.1	0	0	0.33	0	0	0	0	0.15	0	1	1	1	1	1	1	1	1	1	1	1	1	1	1	1	1	1	0.99	0.99	1
ERR339844_ST1	ST1		0.73	1	1	1	1	1	0.29	0.43	0	0.15	0.68	0.59	0.74	0.3	0.38	0	0	0.1	0	0	0	0	0	0	0	0.15	0	1	1	1	1	1	1	1	1	1	1	1	1	0.59	0.15	0.19	0.44	0	0	0	0
ERR339845_ST1	ST1		0.73	1	1	1	1	1	0.29	0.43	0	0.15	0.68	0.59	0.74	0.3	0.38	0	0	0.1	0	0	0.33	0	0	0	0	0.15	0	1	1	1	1	1	1	1	1	1	1	1	1	1	1	1	1	1	0.99	0.99	1
ERR339846_ST1	ST1		0.73	1	1	1	1	1	0.29	0.43	0	0.15	0.68	0.59	0.74	0.3	0.38	0	0	0.1	0	0	0.33	0	0	0	0	0.15	0	1	1	1	1	1	1	1	1	1	1	1	1	1	1	1	1	1	0.99	0.99	1
ERR339847_ST1	ST1		0.73	1	1	1	1	1	0.29	0.43	0	0.15	0.68	0.59	0.74	0.3	0.38	0	0	0.1	0	0	0.33	0	0	0	0	0.15	0	1	1	1	1	1	1	1	1	1	1	1	1	1	1	1	1	1	0.99	0.99	1
ERR339848_ST1	ST1		0.73	1	1	1	1	1	0.29	0.43	0	0.15	0.68	0.59	0.74	0.3	0.38	0	0	0.1	0	0	0.33	0	0	0	0	0.15	0	1	1	1	1	1	1	1	1	1	1	1	1	1	1	1	1	1	0.99	0.99	1
ERR339849_ST1	ST1		0.73	1	1	1	1	1	0.29	0.43	0	0.15	0.68	0.59	0.74	0.3	0.38	0	0	0.1	0	0	0	0	0	0	0	0.15	0	1	1	1	1	1	1	1	1	1	1	1	1	0.59	0.15	0.19	0.44	0	0	0	0
ERR339850_ST1	ST1		0.73	1	1	1	1	1	0.29	0.43	0	0.15	0.68	0.59	0.74	0.3	0.38	0	0	0.1	0	0	0	0	0	0	0	0.15	0	1	1	1	1	1	1	1	1	1	1	1	1	0.59	0.15	0.19	0.44	0	0	0	0
ERR339851_ST1	ST1		0.73	1	1	1	1	1	0.29	0.43	0	0.15	0.68	0.59	0.74	0.3	0.38	0	0	0.1	0	0	0.33	0	0	0	0	0.15	0	1	1	1	1	1	1	1	1	1	1	1	1	1	1	1	1	1	0.99	0.99	1
ERR339852_ST1	ST1		0.73	1	1	1	1	1	0.29	0.43	0	0.15	0.68	0.59	0.74	0.3	0.38	0	0	0.1	0	0	0	0	0	0	0	0.15	0	1	1	1	1	1	1	1	1	1	1	1	1	0.59	0.15	0.19	0.44	0	0	0	0
ERR339853_ST1	ST1		0.73	1	1	1	1	1	0.29	0.43	0	0.15	0.68	0.59	0.74	0.3	0.38	0	0	0.1	0	0	0	0	0	0	0	0.15	0	1	1	1	1	1	1	1	1	1	1	1	1	0.59	0.15	0.19	0.44	0	0	0	0
ERR339854_ST1	ST1		0.73	1	1	1	1	1	0.29	0.43	0	0.15	0.68	0.59	0.74	0.3	0.38	0	0	0.1	0	0	0	0	0	0	0	0.15	0	1	1	1	1	1	1	1	1	1	1	1	1	0.59	0.15	0.19	0.44	0	0	0	0
ERR339855_ST1	ST1		0.73	1	1	1	1	1	0.29	0.43	0	0.15	0.68	0.59	0.74	0.3	0.38	0	0	0.1	0	0	0	0	0	0	0	0.15	0	1	1	1	1	1	1	1	1	1	1	1	1	0.59	0.15	0.19	0.44	0	0	0	0
ERR339856_ST1	ST1		0.73	1	1	1	1	1	0.29	0.43	0	0.15	0.68	0.59	0.74	0.3	0.38	0	0	0.1	0	0	0	0	0	0	0	0.15	0	1	1	1	1	1	1	1	1	1	1	1	1	0.59	0.15	0.19	0.44	0	0	0	0
ERR339857_ST1	ST1		0.73	1	1	1	1	1	0.29	0.43	0	0.15	0.68	0.59	0.74	0.3	0.38	0	0	0.1	0	0	0	0	0	0	0	0.15	0	1	1	1	1	1	1	1	1	1	1	1	1	0.59	0.15	0.19	0.44	0	0	0	0
ERR339858_ST1	ST1		0.73	1	1	1	1	1	0.29	0.43	0	0.15	0.68	0.59	0.74	0.3	0.38	0	0	0.1	0	0	0.1	0	0	0	0	0.15	0	1	1	1	1	1	1	1	1	1	1	1	1	0.59	0.15	0.19	0.44	0	0	0	0.23
ERR339859_ST1	ST1		0.73	1	1	1	1	1	0.29	0.43	0	0.15	0.68	0.59	0.74	0.3	0.38	0	0	0.1	0	0	0.33	0	0	0	0	0.15	0	1	1	1	1	1	1	1	1	1	1	1	1	1	1	1	1	1	0.99	0.99	1
ERR339860_ST1	ST1		0.73	1	1	1	1	1	0.29	0.43	0	0.15	0.68	0.59	0.74	0.3	0.38	0	0	0.1	0	0	0.33	0	0	0	0	0.15	0	1	1	1	1	1	1	1	1	1	1	1	1	1	1	1	1	1	0.99	0.99	1
ERR339861_ST1	ST1		0.73	1	1	1	1	1	0.29	0.43	0	0.15	0.68	0.59	0.74	0.3	0.38	0	0	0.1	0	0	0	0	0	0	0	0.15	0	1	1	1	1	1	1	1	1	1	1	1	1	0.59	0.15	0.19	0.44	0	0	0	0
ERR339862_ST1	ST1		0.73	1	1	1	1	1	0.29	0.43	0	0.15	0.68	0.59	0.74	0.3	0.38	0	0	0.1	0	0	0	0	0	0	0	0.15	0	1	1	1	1	1	1	1	1	1	1	1	1	0.59	0.15	0.19	0.44	0	0	0	0
ERR339863_ST1	ST1		0.73	1	1	1	1	1	0.29	0.43	0	0.15	0.68	0.59	0.74	0.3	0.38	0	0	0.1	0	0	0	0	0	0	0	0.15	0	1	1	1	1	1	1	1	1	1	1	1	1	0.59	0.15	0.19	0.44	0	0	0	0
ERR339864_ST1	ST1		0.73	1	1	1	1	1	0.29	0.43	0	0.15	0.68	0.59	0.74	0.3	0.38	0	0	0.1	0	0	0	0	0	0	0	0.15	0	1	1	1	1	1	1	1	1	1	1	1	1	0.59	0.15	0.19	0.44	0	0	0	0
ERR339865_ST1	ST1		0.73	1	1	1	1	1	0.27	0	0	0.15	0.68	0.59	0.74	0.3	0.38	0	0	0.1	0	0	0	0	0	0	0	0.15	0	0	0.08	0	0	0.12	0.21	0.31	0.3	0.23	0.29	0.34	0	0	0.15	0.19	0.1	0	0	0	0
ERR339866_ST1	ST1		0.73	1	1	1	1	1	0.29	0.43	0	0.15	0.68	0.59	0.74	0.3	0.38	0	0	0.1	0	0	0	0	0	0	0	0.15	0	1	1	1	1	1	1	1	1	1	1	1	1	0.59	0.15	0.19	0.44	0	0	0	0
ERR339867_ST1	ST1		0.73	1	1	1	1	1	0.29	0.43	0	0.15	0.68	0.59	0.74	0.3	0.38	0	0	0.1	0	0	0.33	0	0	0	0	0.15	0	1	1	1	1	1	1	1	1	1	1	1	1	1	1	1	1	1	0.99	0.99	1
ERR339868_ST1	ST1		0.73	1	1	1	1	1	0.29	0.43	0	0.15	0.68	0.59	0.74	0.3	0.38	0	0	0.1	0	0	0.33	0	0	0	0	0.15	0	1	1	1	1	1	1	1	1	1	1	1	1	1	1	1	1	1	0.99	0.99	1
ERR339869_ST1	ST1		0.73	1	1	1	1	1	0.29	0.43	0	0.15	0.68	0.59	0.74	0.3	0.38	0	0	0.1	0	0	0.33	0	0	0	0	0.15	0	1	1	1	1	1	1	1	1	1	1	1	1	1	1	1	1	1	0.99	0.99	1
ERR339870_ST1	ST1		0.73	1	1	1	1	1	0.29	0.43	0	0.15	0.68	0.59	0.74	0.3	0.38	0	0	0.1	0	0	0.33	0	0	0	0	0.15	0	1	1	1	1	1	1	1	1	1	1	1	1	1	1	1	1	1	0.99	0.99	1
ERR339871_ST1	ST1		0.73	1	1	1	1	1	0.29	0.43	0	0.15	0.68	0.59	0.74	0.3	0.38	0	0	0.1	0	0	0	0	0	0	0	0.15	0	1	1	1	1	1	1	1	1	1	1	1	1	0.59	0.15	0.19	0.44	0	0	0	0
ERR339872_ST1	ST1		0.73	1	1	1	1	1	0.29	0.43	0	0.15	0.68	0.59	0.74	0.3	0.38	0	0	0.1	0	0	0	0	0	0	0	0.15	0	1	1	1	1	1	1	1	1	1	1	1	1	0.59	0.15	0.19	0.44	0	0	0	0
ERR339873_ST1	ST1		0.73	1	1	1	1	1	0.29	0.43	0	0.15	0.68	0.59	0.74	0.3	0.38	0	0	0.1	0	0	0	0	0	0	0	0.15	0	1	1	1	1	1	1	1	1	1	1	1	1	0.59	0.15	0.19	0.44	0	0	0	0
ERR339874_ST1	ST1		0.73	1	1	1	1	1	0.29	0.43	0	0.15	0.68	0.59	0.74	0.3	0.38	0	0	0.1	0	0	0	0	0	0	0	0.15	0	1	1	1	1	1	1	1	1	1	1	1	1	0.59	0.15	0.19	0.44	0	0	0	0
ERR339875_ST1	ST1		0.73	1	1	1	1	1	0.29	0.43	0	0.15	0.68	0.59	0.74	0.3	0.38	0	0	0.1	0	0	0.33	0	0	0	0	0.15	0	1	1	1	1	1	1	1	1	1	1	1	1	1	1	1	1	1	0.99	0.99	1
ERR339876_ST1	ST1		0.73	1	1	1	1	1	0.29	0.43	0	0.15	0.68	0.59	0.74	0.3	0.38	0	0	0.1	0	0	0	0	0	0	0	0.15	0	1	1	1	1	1	1	1	1	1	1	1	1	0.59	0.15	0.19	0.44	0	0	0	0
ERR339877_ST1	ST1		0.73	1	1	1	1	1	0.29	0.43	0	0.15	0.68	0.59	0.74	0.3	0.38	0	0	0.1	0	0	0	0	0	0	0	0.15	0	1	1	1	1	1	1	1	1	1	1	1	1	0.59	0.15	0.19	0.44	0	0	0	0
ERR339878_ST1	ST1		0.73	1	1	1	1	1	0.29	0.43	0	0.15	0.68	0.59	0.74	0.3	0.38	0	0	0.1	0	0	0.33	0	0	0	0	0.15	0	1	1	1	1	1	1	1	1	1	1	1	1	1	1	1	1	1	0.99	0.99	1
ERR339879_ST1	ST1		0.73	1	1	1	1	1	0.29	0.43	0	0.15	0.68	0.59	0.74	0.3	0.38	0	0	0.1	0	0	0	0	0	0	0	0.15	0	1	1	1	1	1	1	1	1	1	1	1	1	0.59	0.15	0.19	0.44	0	0	0	0
ERR339880_ST1	ST1		0.73	1	1	1	1	1	0.29	0.43	0	0.15	0.68	0.59	0.74	0.3	0.38	0	0	0.1	0	0	0	0	0	0	0	0.15	0	1	1	1	1	1	1	1	1	1	1	1	1	0.59	0.15	0.19	0.44	0	0	0	0
ERR339881_ST1	ST1		0.73	1	1	1	1	1	0.29	0.43	0	0.15	0.68	0.59	0.74	0.3	0.38	0	0	0.1	0	0	0	0	0	0	0	0.15	0	1	1	1	1	1	1	1	1	1	1	1	1	0.59	0.15	0.19	0.44	0	0	0	0
ERR339882_ST1	ST1		0.73	1	1	1	1	1	0.29	0.43	0	0.15	0.68	0.59	0.74	0.3	0.38	0	0	0.1	0	0	0.33	0	0	0	0	0.15	0	1	1	1	1	1	1	1	1	1	1	1	1	1	1	1	1	1	0.99	0.99	1
ERR339883_ST1	ST1		0.73	1	1	1	1	1	0.29	0.43	0	0.15	0.68	0.59	0.74	0.3	0.38	0	0	0.1	0	0	0	0	0	0	0	0.15	0	1	1	1	1	1	1	1	1	1	1	1	1	0.59	0.15	0.19	0.44	0	0	0	0
ERR339884_ST1	ST1		0.73	1	1	1	1	1	0.29	0.43	0	0.15	0.68	0.59	0.74	0.3	0.38	0	0	0.1	0	0	0	0	0	0	0	0.15	0	1	1	1	1	1	1	1	1	1	1	1	1	0.59	0.15	0.19	0.44	0	0	0	0
ERR339885_ST1	ST1		0.73	1	1	1	1	1	0.29	0.43	0	0.15	0.68	0.59	0.74	0.3	0.38	0	0	0.1	0	0	0	0	0	0	0	0.15	0	1	1	1	1	1	1	1	1	1	1	1	1	0.59	0.15	0.19	0.44	0	0	0	0
ERR339886_ST1	ST1		0.73	1	1	1	1	1	0.29	0.43	0	0.15	0.68	0.59	0.74	0.3	0.38	0	0	0.1	0	0	0.33	0	0	0	0	0.15	0	1	1	1	1	1	1	1	1	1	1	1	1	1	1	1	1	1	0.99	0.99	1
ERR339887_ST1	ST1		0.73	1	1	1	1	1	0.29	0.43	0	0.15	0.68	0.59	0.74	0.3	0.38	0	0	0.1	0	0	0	0	0	0	0	0.15	0	1	1	1	1	1	1	1	1	1	1	1	1	0.59	0.15	0.19	0.44	0	0	0	0
ERR339888_ST1	ST1		0.73	1	1	1	1	1	0.29	0.43	0	0.15	0.68	0.59	0.74	0.3	0.38	0	0	0.1	0	0	0	0	0	0	0	0.15	0	1	1	1	1	1	1	1	1	1	1	1	1	0.59	0.15	0.19	0.44	0	0	0	0
ERR339889_ST1	ST1		0.73	1	1	1	1	1	0.29	0.43	0	0.15	0.68	0.59	0.74	0.3	0.38	0	0	0.1	0	0	0.33	0	0	0	0	0.15	0	1	1	1	1	1	1	1	1	1	1	1	1	1	1	1	1	1	0.99	0.99	1
ERR339890_ST1	ST1		0.73	1	1	1	1	1	0.29	0.43	0	0.15	0.68	0.59	0.74	0.3	0.38	0	0	0.1	0	0	0	0	0	0	0	0.15	0	1	1	1	1	1	1	1	1	1	1	1	1	0.59	0.15	0.19	0.44	0	0	0	0
ERR339891_ST1	ST1		0.73	1	1	1	1	1	0.29	0.43	0	0.15	0.68	0.59	0.74	0.3	0.38	0	0	0.1	0	0	0	0	0	0	0	0.15	0	1	1	1	1	1	1	1	1	1	1	1	1	0.59	0.15	0.19	0.44	0	0	0	0
ERR339892_ST1	ST1		0.73	1	1	1	1	1	0.29	0.43	0	0.15	0.68	0.59	0.74	0.3	0.38	0	0	0.1	0	0	0	0	0	0	0	0.15	0	1	1	1	1	1	1	1	1	1	1	1	1	0.59	0.15	0.19	0.44	0	0	0	0
ERR339893_ST1	ST1		0.73	1	1	1	1	1	0.29	0.43	0	0.15	0.68	0.59	0.74	0.3	0.38	0	0	0.1	0	0	0	0	0	0	0	0.15	0	1	1	1	1	1	1	1	1	1	1	1	1	0.59	0.15	0.19	0.44	0	0	0	0
ERR339894_ST1	ST1		0.73	1	1	1	1	1	0.29	0.43	0	0.15	0.68	0.59	0.74	0.3	0.38	0	0	0.1	0	0	0.33	0	0	0	0	0.15	0	1	1	1	1	1	1	1	1	1	1	1	1	1	1	1	1	1	0.99	0.99	1
ERR339895_ST1	ST1		0.73	1	1	1	1	1	0.29	0.43	0	0.15	0.68	0.59	0.74	0.3	0.38	0	0	0.1	0	0	0	0	0	0	0	0.15	0	1	1	1	1	1	1	1	1	1	1	1	1	0.59	0.15	0.19	0.44	0	0	0	0
ERR339896_ST1	ST1		0.73	1	1	1	1	1	0.29	0.43	0	0.15	0.68	0.59	0.74	0.3	0.38	0	0	0.1	0	0	0	0	0	0	0	0.15	0	1	1	1	1	1	1	1	1	1	1	1	1	0.59	0.15	0.19	0.44	0	0	0	0
ERR339897_ST1	ST1		0.73	1	1	1	1	1	0.29	0.43	0	0.15	0.68	0.59	0.74	0.3	0.38	0	0	0.1	0	0	0	0	0	0	0	0.15	0	1	1	1	1	1	1	1	1	1	1	1	1	0.59	0.15	0.19	0.44	0	0	0	0
ERR339898_ST1	ST1		0.73	1	1	1	1	1	0.29	0.43	0	0.15	0.68	0.59	0.74	0.3	0.38	0	0	0.1	0	0	0	0	0	0	0	0.15	0	1	1	1	1	1	1	1	1	1	1	1	1	0.59	0.15	0.19	0.44	0	0	0	0
ERR339899_ST1	ST1		0.73	1	1	1	1	1	0.27	0	0	0.15	0.68	0.59	0.74	0.3	0.38	0	0	0.1	0	0	0	0	0	0	0	0.15	0	0	0.08	0	0	0.12	0.21	0.31	0.3	0.23	0.29	0.34	0	0	0.15	0.19	0.1	0	0	0	0
ERR339900_ST1	ST1		0.73	1	1	1	1	1	0.29	0.43	0	0.15	0.68	0.59	0.74	0.3	0.38	0	0	0.1	0	0	0	0	0	0	0	0.15	0	1	1	1	1	1	1	1	1	1	1	1	1	0.59	0.15	0.19	0.44	0	0	0	0
ERR339901_ST1	ST1		0.73	1	1	1	1	1	0.29	0.43	0	0.15	0.68	0.59	0.74	0.3	0.38	0	0	0.1	0	0	0	0	0	0	0	0.15	0	1	1	1	1	1	1	1	1	1	1	1	1	0.59	0.15	0.19	0.44	0	0	0	0
ERR339902_ST1	ST1		0.73	1	1	1	1	1	0.29	0.43	0	0.15	0.68	0.59	0.74	0.3	0.38	0	0	0.1	0	0	0	0	0	0	0	0.15	0	1	1	1	1	1	1	1	1	1	1	1	1	0.59	0.15	0.19	0.44	0	0	0	0
ERR339903_ST1	ST1		0.73	1	1	1	1	1	0.29	0.43	0	0.15	0.68	0.59	0.74	0.3	0.38	0	0	0.1	0	0	0	0	0	0	0	0.15	0	1	1	1	1	1	1	1	1	1	1	1	1	0.59	0.15	0.19	0.44	0	0	0	0
ERR339904_ST1	ST1		0.73	1	1	1	1	1	0.29	0.43	0	0.15	0.68	0.59	0.74	0.3	0.38	0	0	0.1	0	0	0	0	0	0	0	0.15	0	1	1	1	1	1	1	1	1	1	1	1	1	0.59	0.15	0.19	0.44	0	0	0	0
ERR339905_ST1	ST1		0.73	1	1	1	1	1	0.29	0.43	0	0.15	0.68	0.59	0.74	0.3	0.38	0	0	0.1	0	0	0	0	0	0	0	0.15	0	1	1	1	1	1	1	1	1	1	1	1	1	0.59	0.15	0.19	0.44	0	0	0	0
ERR339906_ST1	ST1		0.73	1	1	1	1	1	0.29	0.43	0	0.15	0.68	0.59	0.74	0.3	0.38	0	0	0.1	0	0	0	0	0	0	0	0.15	0	1	1	1	1	1	1	1	1	1	1	1	1	0.59	0.15	0.19	0.44	0	0	0	0
ERR339907_ST1	ST1		0.73	1	1	1	1	1	0.29	0.43	0	0.15	0.68	0.59	0.74	0.3	0.38	0	0	0.1	0	0	0	0	0	0	0	0.15	0	1	1	1	1	1	1	1	1	1	1	1	1	0.59	0.15	0.19	0.44	0	0	0	0
ERR339908_ST1	ST1		0.73	1	1	1	1	1	0.29	0.43	0	0.15	0.68	0.59	0.74	0.3	0.38	0	0	0.1	0	0	0	0	0	0	0	0.15	0	1	1	1	1	1	1	1	1	1	1	1	1	0.59	0.15	0.19	0.44	0	0	0	0
ERR339909_ST1	ST1		0.73	1	1	1	1	1	0.29	0.43	0	0.15	0.68	0.59	0.74	0.3	0.38	0	0	0.1	0	0	0	0	0	0	0	0.15	0	1	1	1	1	1	1	1	1	1	1	1	1	0.59	0.15	0.19	0.44	0	0	0	0
ERR339910_ST1	ST1		0.73	1	1	1	1	1	0.29	0.43	0	0.15	0.68	0.59	0.74	0.3	0.38	0	0	0.1	0	0	0	0	0	0	0	0.15	0	1	1	1	1	1	1	1	1	1	1	1	1	0.59	0.15	0.19	0.44	0	0	0	0
ERR339911_ST1	ST1		0.73	1	1	1	1	1	0.29	0.43	0	0.15	0.68	0.59	0.74	0.3	0.38	0	0	0.1	0	0	0	0	0	0	0	0.15	0	1	1	1	1	1	1	1	1	1	1	1	1	0.59	0.15	0.19	0.44	0	0	0	0
ERR339912_ST1	ST1		0.73	1	1	1	1	1	0.29	0.43	0	0.15	0.68	0.59	0.74	0.3	0.38	0	0	0.1	0	0	0	0	0	0	0	0.15	0	1	1	1	1	1	1	1	1	1	1	1	1	0.59	0.15	0.19	0.44	0	0	0	0
ERR339913_ST1	ST1		0.73	1	1	1	1	1	0.29	0.43	0	0.15	0.68	0.59	0.74	0.3	0.38	0	0	0.1	0	0	0	0	0	0	0	0.15	0	1	1	1	1	1	1	1	1	1	1	1	1	0.59	0.15	0.19	0.44	0	0	0	0
ERR339914_ST1	ST1		0.73	1	1	1	1	1	0.29	0.43	0	0.15	0.68	0.59	0.74	0.3	0.38	0	0	0.1	0	0	0	0	0	0	0	0.15	0	1	1	1	1	1	1	1	1	1	1	1	1	0.59	0.15	0.19	0.44	0	0	0	0
ERR339915_ST1	ST1		0.73	1	1	1	1	1	0.29	0.43	0	0.15	0.68	0.59	0.74	0.3	0.38	0	0	0.1	0	0	0	0	0	0	0	0.15	0	1	1	1	1	1	1	1	1	1	1	1	1	0.59	0.15	0.19	0.44	0	0	0	0
ERR339916_ST1	ST1		0.73	1	1	1	1	1	0.29	0.43	0	0.15	0.68	0.59	0.74	0.3	0.38	0	0	0.1	0	0	0	0	0	0	0	0.15	0	1	1	1	1	1	1	1	1	1	1	1	1	0.59	0.15	0.19	0.44	0	0	0	0
ERR339917_ST1	ST1		0.73	1	1	1	1	1	0.29	0.43	0	0.15	0.68	0.59	0.74	0.3	0.38	0	0	0.1	0	0	0	0	0	0	0	0.15	0	1	1	1	1	1	1	1	1	1	1	1	1	0.59	0.15	0.19	0.44	0	0	0	0
ERR339918_ST1	ST1		0.73	1	1	1	1	1	0.29	0.43	0	0.15	0.68	0.59	0.74	0.3	0.38	0	0	0.1	0	0	0	0	0	0	0	0.15	0	1	1	1	1	1	1	1	1	1	1	1	1	0.59	0.15	0.19	0.44	0	0	0	0
ERR339919_ST1	ST1		0.73	1	1	1	1	1	0.29	0.43	0	0.15	0.68	0.59	0.74	0.3	0.38	0	0	0.1	0	0	0	0	0	0	0	0.15	0	1	1	1	1	1	1	1	1	1	1	1	1	0.59	0.15	0.19	0.44	0	0	0	0
ERR339920_ST1	ST1		0.73	1	1	1	1	1	0.29	0.43	0	0.17	0.68	0.59	0.74	0.3	0.38	0	0	0.1	0	0	0	0	0	0	0	0.15	0	1	1	1	1	1	1	1	1	1	1	1	1	0.59	0.15	0.19	0.44	0	0	0	0
ERR339921_ST1	ST1		0.73	1	1	1	1	1	0.29	0.43	0	0.15	0.68	0.59	0.74	0.3	0.38	0	0	0.1	0	0	0	0	0	0	0	0.15	0	1	1	1	1	1	1	1	1	1	1	1	1	0.59	0.15	0.19	0.44	0	0	0	0
ERR339922_ST1	ST1		0.73	1	1	1	1	1	0.29	0.43	0	0.15	0.68	0.59	0.74	0.3	0.38	0	0	0.1	0	0	0.33	0	0	0	0	0.15	0	1	1	1	1	1	1	1	1	1	1	1	1	1	1	1	1	1	0.99	0.99	1
ERR339923_ST1	ST1		0.73	1	1	1	1	1	0.29	0.43	0	0.15	0.68	0.59	0.74	0.3	0.38	0	0	0.1	0	0	0	0	0	0	0	0.15	0	1	1	1	1	1	1	1	1	1	1	1	1	0.59	0.15	0.19	0.44	0	0	0	0
ERR339924_ST1	ST1		0.73	1	1	1	1	1	0.29	0.43	0	0.15	0.68	0.59	0.74	0.3	0.38	0	0	0.1	0	0	0	0	0	0	0	0.15	0	1	1	1	1	1	1	1	1	1	1	1	1	0.59	0.15	0.19	0.44	0	0	0	0
ERR339925_ST1	ST1		0.73	1	1	1	1	1	0.29	0.43	0	0.15	0.68	0.59	0.74	0.3	0.38	0	0	0.1	0	0	0	0	0	0	0	0.15	0	1	1	1	1	1	1	1	1	1	1	1	1	0.59	0.15	0.19	0.44	0	0	0	0
ERR339926_ST1	ST1		0.73	1	1	1	1	1	0.29	0.43	0	0.15	0.68	0.59	0.74	0.3	0.38	0	0	0.1	0	0	0	0	0	0	0	0.15	0	1	1	1	1	1	1	1	1	1	1	1	1	0.59	0.15	0.19	0.44	0	0	0	0
ERR339927_ST1	ST1		0.73	1	1	1	1	1	0.29	0.43	0	0.15	0.68	0.59	0.74	0.3	0.38	0	0	0.1	0	0	0.08	0	0	0	0	0.15	0	1	1	1	1	1	1	1	1	1	1	1	1	0.59	0.15	0.19	0.44	0	0.39	0	0.13
ERR339928_ST1	ST1		0.73	1	1	1	1	1	0.29	0.43	0	0.15	0.68	0.59	0.74	0.3	0.38	0	0	0.1	0	0	0.33	0	0	0	0	0.15	0	1	1	1	1	1	1	1	1	1	1	1	1	1	1	1	1	1	0.99	0.99	1
ERR339929_ST1	ST1		0.73	1	1	1	1	1	0.29	0.43	0	0.15	0.68	0.59	0.74	0.3	0.38	0	0	0.1	0	0	0	0	0	0	0	0.15	0	1	1	1	1	1	1	1	1	1	1	1	1	0.59	0.15	0.19	0.44	0	0	0	0
ERR339930_ST1	ST1		0.73	1	1	1	1	1	0.29	0.43	0	0.15	0.68	0.59	0.74	0.3	0.38	0	0	0.1	0	0	0.33	0	0	0	0	0.15	0	1	1	1	1	1	1	1	1	1	1	1	1	1	1	1	1	1	0.99	0.99	1
ERR339931_ST1	ST1		0.73	1	1	1	1	1	0.29	0.43	0	0.15	0.68	0.59	0.74	0.3	0.38	0	0	0.1	0	0	0	0	0	0	0	0.15	0	1	1	1	1	1	1	1	1	1	1	1	1	0.59	0.15	0.19	0.44	0	0	0	0
ERR339932_ST1	ST1		0.73	1	1	1	1	1	0.29	0.43	0	0.15	0.68	0.59	0.74	0.3	0.38	0	0	0.1	0	0	0.33	0	0	0	0	0.15	0	1	1	1	1	1	1	1	1	1	1	1	1	1	1	1	1	1	0.99	0.99	1
ERR339933_ST1	ST1		0.73	1	1	1	1	1	0.29	0.43	0	0.15	0.68	0.59	0.74	0.3	0.38	0	0	0.1	0	0	0	0	0	0	0	0.15	0	1	1	1	1	1	1	1	1	1	1	1	1	0.59	0.15	0.19	0.44	0	0	0	0
ERR339934_ST1	ST1		0.73	1	1	1	1	1	0.29	0.43	0	0.15	0.68	0.59	0.74	0.3	0.38	0	0	0.1	0	0	0	0	0	0	0	0.15	0	1	1	1	1	1	1	1	1	1	1	1	1	0.59	0.15	0.19	0.44	0	0	0	0
ERR339935_ST1	ST1		0.73	1	1	1	1	1	0.29	0.43	0	0.15	0.68	0.59	0.74	0.3	0.38	0	0	0.1	0	0	0	0	0	0	0	0.15	0	1	1	1	1	1	1	1	1	1	1	1	1	0.59	0.15	0.19	0.44	0	0	0	0
ERR339936_ST1	ST1		0.73	1	1	1	1	1	0.29	0.43	0	0.15	0.68	0.59	0.74	0.3	0.38	0	0	0.1	0	0	0	0	0	0	0	0.15	0	1	1	1	1	1	1	1	1	1	1	1	1	0.59	0.15	0.19	0.44	0	0	0	0
ERR339937_ST1	ST1		0.73	1	1	1	1	1	0.29	0.43	0	0.15	0.68	0.59	0.74	0.3	0.38	0	0	0.1	0	0	0.33	0	0	0	0	0.15	0	1	1	1	1	1	1	1	1	1	1	1	1	1	1	1	1	1	0.99	0.99	1
ERR339938_ST1	ST1		0.73	1	1	1	1	1	0.29	0.43	0	0.15	0.68	0.59	0.74	0.3	0.38	0	0	0.1	0	0	0.33	0	0	0	0	0.15	0	1	1	1	1	1	1	1	1	1	1	1	1	1	1	1	1	1	0.99	0.99	1
ERR339939_ST1	ST1		0.73	1	1	1	1	1	0.29	0.43	0	0.15	0.68	0.59	0.74	0.3	0.38	0	0	0.1	0	0	0.33	0	0	0	0	0.15	0	1	1	1	1	1	1	1	1	1	1	1	1	1	1	1	1	1	0.99	0.99	1
ERR339941_ST1	ST1		0.73	1	1	1	1	1	0.29	0.43	0	0.15	0.68	0.59	0.74	0.3	0.38	0	0	0.1	0	0	0	0	0	0	0	0.15	0	1	1	1	1	1	1	1	1	1	1	1	1	0.59	0.15	0.19	0.44	0	0	0	0
ERR339942_ST1	ST1		0.73	1	1	1	1	1	0.29	0.43	0	0.15	0.68	0.59	0.74	0.3	0.38	0	0	0.1	0	0	0	0	0	0	0	0.15	0	1	1	1	1	1	1	1	1	1	1	1	1	0.59	0.15	0.19	0.44	0	0	0	0
ERR339943_ST1	ST1		0.73	1	1	1	1	1	0.29	0.43	0	0.15	0.68	0.59	0.74	0.3	0.38	0	0	0.1	0	0	0	0	0	0	0	0.15	0	1	1	1	1	1	1	1	1	1	1	1	1	0.59	0.15	0.19	0.44	0	0	0	0
ERR339944_ST1	ST1		0.73	1	1	1	1	1	0.29	0.43	0	0.15	0.68	0.59	0.74	0.3	0.38	0	0	0.1	0	0	0	0	0	0	0	0.15	0	1	1	1	1	1	1	1	1	1	1	1	1	0.59	0.15	0.19	0.44	0	0	0	0
ERR339945_ST1	ST1		0.73	1	1	1	1	1	0.29	0.43	0	0.15	0.68	0.59	0.74	0.3	0.38	0	0	0.1	0	0	0	0	0	0	0	0.15	0	1	1	1	1	1	1	1	1	1	1	1	1	0.59	0.15	0.19	0.44	0	0	0	0
ERR339946_ST1	ST1		0.73	1	1	1	1	1	0.29	0.43	0	0.15	0.68	0.59	0.74	0.3	0.38	0	0	0.1	0	0	0	0	0	0	0	0.15	0	1	1	1	1	1	1	1	1	1	1	1	1	0.59	0.15	0.19	0.44	0	0	0	0
ERR339947_ST1	ST1		0.73	1	1	1	1	1	0.29	0.43	0	0.17	0.68	0.59	0.74	0.3	0.38	0	0	0.1	0	0	0.33	0	0	0	0	0.15	0	1	1	1	1	1	1	1	1	1	1	1	1	1	1	1	1	1	0.99	0.99	1
ERR339948_ST1	ST1		0.73	1	1	1	1	1	0.29	0.43	0	0.15	0.68	0.59	0.74	0.3	0.38	0	0	0.1	0	0	0	0	0	0	0	0.15	0	1	1	1	1	1	1	1	1	1	1	1	1	0.59	0.15	0.19	0.44	0	0	0	0
ERR339949_ST1	ST1		0.73	1	1	1	1	1	0.29	0.43	0	0.15	0.68	0.59	0.74	0.3	0.38	0	0	0.1	0	0	0	0	0	0	0	0.15	0	1	1	1	1	1	1	1	1	1	1	1	1	0.59	0.15	0.19	0.44	0	0	0	0
ERR339950_ST1	ST1		0.73	1	1	1	1	1	0.29	0.43	0	0.15	0.68	0.59	0.74	0.3	0.38	0	0	0.1	0	0	0	0	0	0	0	0.15	0	1	1	1	1	1	1	1	1	1	1	1	1	0.59	0.15	0.19	0.44	0	0	0	0
ERR339951_ST1	ST1		0.73	1	1	1	1	1	0.29	0.43	0	0.15	0.68	0.59	0.74	0.3	0.38	0	0	0.1	0	0	0	0	0	0	0	0.15	0	1	1	1	1	1	1	1	1	1	1	1	1	0.59	0.15	0.19	0.44	0	0	0	0
ERR339952_ST1	ST1		0.73	1	1	1	1	1	0.29	0.43	0	0.15	0.68	0.59	0.74	0.3	0.38	0	0	0.1	0	0	0	0	0	0	0	0.15	0	1	1	1	1	1	1	1	1	1	1	1	1	0.59	0.15	0.19	0.44	0	0	0	0
ERR339953_ST1	ST1		0.73	1	1	1	1	1	0.29	0.43	0	0.15	0.68	0.59	0.74	0.3	0.38	0	0	0.1	0	0	0	0	0	0	0	0.15	0	1	1	1	1	1	1	1	1	1	1	1	1	0.59	0.15	0.19	0.44	0	0	0	0
ERR339954_ST1	ST1		0.73	1	1	1	1	1	0.29	0.43	0	0.15	0.68	0.59	0.74	0.3	0.38	0	0	0.1	0	0	0	0	0	0	0	0.15	0	1	1	1	1	1	1	1	1	1	1	1	1	0.59	0.15	0.19	0.44	0	0	0	0
ERR339955_ST1	ST1		0.73	1	1	1	1	1	0.29	0.43	0	0.15	0.68	0.59	0.74	0.3	0.38	0	0	0.1	0	0	0	0	0	0	0	0.15	0	1	1	1	1	1	1	1	1	1	1	1	1	0.59	0.15	0.19	0.44	0	0	0	0
ERR339956_ST1	ST1		0.73	1	1	1	1	1	0.29	0.43	0	0.17	0.68	0.59	0.74	0.3	0.38	0	0	0.1	0	0	0	0	0	0	0.13	0.3	0	1	1	1	1	1	1	1	1	1	1	1	1	0.59	0.15	0.19	0.44	0.18	0	0	0
ERR339957_ST1	ST1		0.73	1	1	1	1	1	0.29	0.43	0	0.15	0.68	0.59	0.74	0.3	0.38	0	0	0.1	0	0	0.33	0	0	0	0	0.15	0	1	1	1	1	1	1	1	1	1	1	1	1	1	1	1	1	1	0.99	0.99	1
ERR340071_ST1	ST1		0.73	1	1	1	1	1	0.29	0.43	0	0.25	0.68	0.59	0.74	0.3	0.38	0	0	0.1	0	0	0	0	0	0	0	0.15	0	1	1	1	1	1	1	1	1	1	1	1	1	0.59	0.15	0.19	0.44	0	0	0	0
ERR340076_ST1	ST1		0.73	1	1	1	1	1	0.29	0.43	0	0.15	0.68	0.59	0.74	0.3	0.38	0	0	0.1	0	0	0	0	0	0	0	0.15	0	1	1	1	1	1	1	1	1	1	1	1	1	0.59	0.15	0.19	0.44	0	0	0	0
ERR340077_ST1	ST1		0.68	1	1	1	1	1	0.29	0.43	0	0.15	0.68	0.59	0.74	0.3	0.38	0	0	0.1	0	0	0	0	0	0	0	0.15	0	1	1	1	1	1	1	1	1	1	1	1	1	0.59	0.15	0.19	0.44	0	0	0	0
ERR340078_ST1	ST1		0.73	1	1	1	1	1	0.29	0.43	0	0.15	0.68	0.59	0.74	0.3	0.38	0	0	0.1	0	0	0	0	0	0.1	0	0.15	0	1	1	1	1	1	1	1	1	1	1	1	1	0.59	0.15	0.19	0.44	0	0	0	0
ERR340113_ST1	ST1		0.73	1	1	1	1	1	0.29	0.43	0	0.17	0.68	0.59	0.74	0.3	0.38	0	0	0.1	0	0	0	0	0	0	0	0.15	0	1	1	1	1	1	1	1	1	1	1	1	1	0.59	0.15	0.19	0.44	0	0	0	0
ERR340127_ST1	ST1		0.73	1	1	1	1	1	0.29	0.43	0	0.15	0.68	0.59	0.74	0.3	0.38	0	0	0.1	0	0	0	0	0	0	0	0.15	0	1	1	1	1	1	1	1	1	1	1	1	1	0.59	0.15	0.19	0.44	0	0	0	0
ERR340131_ST1	ST1		0.73	1	1	1	1	1	0.29	0.43	0	0.15	0.68	0.59	0.74	0.3	0.38	0	0	0.1	0	0	0	0	0	0	0	0.15	0	1	1	1	1	1	1	1	1	1	1	1	1	0.59	0.15	0.19	0.44	0	0	0	0
ERR340147_ST1	ST1		0.73	1	1	1	1	1	0.29	0.43	0	0.15	0.68	0.59	0.74	0.3	0.38	0	0	0.1	0	0	0	0	0	0	0	0.15	0	1	1	1	1	1	1	1	1	1	1	1	1	0.59	0.15	0.19	0.44	0	0	0	0
ERR340181_ST1	ST1		0.73	1	1	1	1	1	0.29	0.43	0	0.15	0.68	0.59	0.74	0.3	0.38	0	0	0.1	0	0	0	0	0	0	0	0.15	0	1	1	1	1	1	1	1	1	1	1	1	1	0.59	0.15	0.19	0.44	0	0	0	0
ERR340288_ST1	ST1		0.73	1	1	1	1	1	0.29	0.43	0	0.15	0.68	0.59	0.74	0.3	0.38	0	0	0.1	0	0	0.33	0	0	0	0	0.15	0	1	1	1	1	1	1	1	1	1	1	1	1	1	1	1	1	1	0.99	0.99	1
ERR340290_ST1	ST1		0.73	1	1	1	1	1	0.29	0.43	0	0.15	0.68	0.59	0.74	0.3	0.38	0	0	0.1	0	0	0	0	0	0	0	0.15	0	1	1	1	1	1	1	1	1	1	1	1	1	0.59	0.15	0.19	0.44	0	0	0	0
ERR340302_ST1	ST1		0.73	1	1	1	1	1	0.29	0.43	0	0.15	0.68	0.59	0.74	0.3	0.38	0	0	0.1	0	0	0	0	0	0	0	0.15	0	1	1	1	1	1	1	1	1	1	1	1	1	0.59	0.15	0.19	0.44	0	0	0	0
ERR340303_ST1	ST1		0.73	1	1	1	1	1	0.29	0.43	0	0.15	0.68	0.59	0.74	0.3	0.38	0	0	0.1	0	0	0	0	0	0	0	0.15	0	1	1	1	1	1	1	1	1	1	1	1	1	0.59	0.15	0.19	0.44	0	0	0	0
ERR340304_ST1	ST1		0.73	1	1	1	1	1	0.29	0.43	0	0.15	0.68	0.59	0.74	0.3	0.38	0	0	0.1	0	0	0	0	0	0	0	0.15	0	1	1	1	1	1	1	1	1	1	1	1	1	0.59	0.15	0.19	0.44	0	0	0	0
ERR340305_ST1	ST1		0.73	1	1	1	1	1	0.29	0.43	0	0.15	0.68	0.59	0.74	0.3	0.38	0	0	0.1	0	0	0	0	0	0	0	0.15	0	1	1	1	1	1	1	1	1	1	1	1	1	0.59	0.15	0.19	0.44	0	0	0	0
ERR347491_ST1	ST1		0.73	1	1	1	1	1	0.29	0.43	0	0.17	0.68	0.59	0.74	0.3	0.38	0	0	0.1	0	0	0	0	0	0	0	0.15	0	1	1	1	1	1	1	1	1	1	1	1	1	0.59	0.15	0.19	0.44	0	0	0	0
ERR347508_ST1	ST1		0.73	1	1	1	1	1	0.29	0.43	0	0.17	0.68	0.59	0.74	0.3	0.38	0	0	0.1	0	0	0	0	0	0	0	0.15	0	1	1	1	1	1	1	1	1	1	1	1	1	0.59	0.15	0.19	0.44	0	0	0	0
ERR347535_ST1	ST1		0.73	1	1	1	1	1	0.27	0	0	0.15	0.68	0.59	0.74	0.3	0.38	0	0	0.1	0	0	0	0	0	0	0	0.15	0	0	0.08	0	0	0.12	0.21	0.31	0.3	0.23	0.29	0.34	0	0	0.15	0.19	0.1	0	0	0	0.05
ERR347577_ST1	ST1		0.73	1	1	1	1	1	0.29	0.43	0	0.15	0.68	0.59	0.74	0.3	0.38	0	0	0.1	0	0	0	0	0	0	0	0.15	0	1	1	1	1	1	1	1	1	1	1	1	1	0.59	0.15	0.19	0.44	0	0	0	0
ERR347578_ST1	ST1		0.73	1	1	1	1	1	0.29	0.43	0	0.15	0.68	0.59	0.74	0.3	0.38	0	0	0.1	0	0	0	0	0	0	0	0.15	0	1	1	1	1	1	1	1	1	1	1	1	1	0.59	0.15	0.19	0.44	0	0	0	0
ERR347579_ST1	ST1		0.73	1	1	1	1	1	0.29	0.43	0	0.15	0.68	0.59	0.74	0.3	0.38	0	0	0.1	0	0	0.33	0	0	0	0	0.15	0	1	1	1	1	1	1	1	1	1	1	1	1	1	1	1	1	1	0.99	0.99	1
ERR347580_ST1	ST1		0.73	1	1	1	1	1	0.29	0.43	0	0.15	0.68	0.59	0.74	0.3	0.38	0	0	0.1	0	0	0	0	0	0	0	0.15	0	1	1	1	1	1	1	1	1	1	1	1	1	0.59	0.15	0.19	0.44	0	0	0	0
ERR347581_ST1	ST1		0.73	1	1	1	1	1	0.29	0.43	0	0.15	0.68	0.59	0.74	0.3	0.38	0	0	0.1	0	0	0	0	0	0	0.13	0.44	0	1	1	1	1	1	1	1	1	1	1	1	1	0.59	0.15	0.19	0.44	0.19	0	0	0
ERR347583_ST1	ST1		0.73	1	1	1	1	1	0.29	0.43	0	0.15	0.68	0.59	0.74	0.3	0.38	0	0	0.1	0	0	0	0	0	0	0	0.15	0	1	1	1	1	1	1	1	1	1	1	1	1	0.59	0.15	0.19	0.44	0	0	0	0
ERR347584_ST1	ST1		0.73	1	1	1	1	1	0.29	0.43	0	0.15	0.68	0.59	0.74	0.3	0.38	0	0	0.1	0	0	0	0	0	0	0	0.15	0	1	1	1	1	1	1	1	1	1	1	1	1	0.59	0.15	0.19	0.44	0	0	0	0
ERR347586_ST1	ST1		0.73	1	1	1	1	1	0.29	0.43	0	0.15	0.68	0.59	0.74	0.3	0.38	0	0	0.1	0	0	0	0	0	0	0.13	0.44	0	1	0.99	1	1	1	1	1	1	1	1	1	1	0.59	0.15	0.19	0.44	0.19	0	0	0
ERR347588_ST1	ST1		0.73	1	1	1	1	1	0.29	0.42	0	0.15	0.68	0.59	0.74	0.3	0.38	0	0	0.1	0	0	0	0	0	0	0	0.15	0	0.98	1	1	1	1	1	1	1	1	1	1	1	0.58	0.15	0.19	0.44	0	0	0	0
ERR347589_ST1	ST1		0.73	1	1	1	1	1	0.29	0.43	0	0.15	0.68	0.59	0.74	0.3	0.38	0	0	0.1	0	0	0	0	0	0	0	0.15	0	1	1	1	1	1	1	1	1	1	1	1	1	0.59	0.15	0.19	0.44	0	0	0	0
ERR347590_ST1	ST1		0.73	1	1	1	1	1	0.29	0.43	0	0.15	0.68	0.59	0.74	0.3	0.38	0	0	0.1	0	0	0	0	0	0	0	0.15	0	1	1	1	1	1	1	1	1	1	1	1	1	0.59	0.15	0.19	0.44	0	0	0	0
ERR347591_ST1	ST1		0.73	1	1	1	1	1	0.29	0.43	0	0.15	0.68	0.59	0.74	0.3	0.38	0	0	0.1	0	0	0	0	0	0	0	0.15	0	1	1	1	1	1	1	1	1	1	1	1	1	0.59	0.15	0.19	0.44	0	0	0	0
ERR347593_ST1	ST1		0.73	1	1	1	1	1	0.29	0.43	0	0.25	0.68	0.59	0.74	0.3	0.38	0	0	0.1	0	0	0	0	0	0	0	0.15	0	1	1	1	1	1	1	1	1	1	1	1	1	0.59	0.15	0.19	0.44	0	0	0	0
ERR347594_ST1	ST1		0.73	1	1	1	1	1	0.29	0.44	0	0.26	0.68	0.59	0.74	0.3	0.38	0	0	0.1	0	0	0	0	0	0	0	0.15	0	1	1	1	1	1	1	1	1	1	1	1	1	0.59	0.15	0.19	0.44	0	0	0	0
ERR347596_ST1	ST1		0.73	1	1	1	1	1	0.29	0.43	0	0.15	0.68	0.59	0.74	0.3	0.38	0	0	0.1	0	0	0	0	0	0	0.13	0.44	0	1	0.99	1	1	1	1	1	1	1	1	1	1	0.59	0.15	0.19	0.44	0.19	0	0	0
ERR347598_ST1	ST1		0.73	1	1	1	1	1	0.29	0.43	0	0.25	0.68	0.59	0.74	0.3	0.38	0	0	0.1	0	0	0	0	0	0	0	0.15	0	1	1	1	1	1	1	1	1	1	1	1	1	0.59	0.15	0.19	0.44	0	0	0	0
ERR347599_ST1	ST1		0.73	1	1	1	1	1	0.29	0.43	0	0.15	0.68	0.59	0.74	0.3	0.38	0	0	0.1	0	0	0.33	0	0	0	0	0.15	0	1	1	1	1	1	1	1	1	1	1	1	1	1	1	1	1	1	0.99	0.99	1
ERR347601_ST1	ST1		0.73	1	1	1	1	1	0.29	0.43	0	0.15	0.68	0.59	0.74	0.3	0.38	0	0	0.1	0	0	0	0	0	0	0	0.15	0	1	1	1	1	1	1	1	1	1	1	1	1	0.59	0.15	0.19	0.44	0	0	0	0
ERR347602_ST1	ST1		0.73	1	1	1	1	1	0.29	0.43	0	0.15	0.68	0.59	0.74	0.3	0.38	0	0	0.1	0	0	0	0	0	0	0.13	0.44	0	1	0.99	1	1	1	1	1	1	1	1	1	1	0.59	0.15	0.19	0.44	0.19	0	0	0
ERR347603_ST1	ST1		0.73	1	1	1	1	1	0.29	0.43	0	0.15	0.68	0.59	0.74	0.3	0.38	0	0	0.1	0	0	0	0	0	0	0	0.15	0	1	1	1	1	1	1	1	1	1	1	1	1	0.59	0.15	0.19	0.44	0	0	0	0
ERR347604_ST1	ST1		0.73	1	1	1	1	1	0.29	0.43	0	0.15	0.68	0.59	0.74	0.3	0.38	0	0	0.1	0	0	0	0	0	0	0	0.15	0	1	1	1	1	1	1	1	1	1	1	1	1	0.59	0.15	0.19	0.44	0	0	0	0
ERR347605_ST1	ST1		0.73	1	1	1	1	1	0.29	0.43	0	0.15	0.68	0.59	0.74	0.3	0.38	0	0	0.1	0	0	0	0	0	0	0	0.15	0	1	1	1	1	1	1	1	1	1	1	1	1	0.59	0.15	0.19	0.44	0	0	0	0
ERR347606_ST1	ST1		0.73	1	1	1	1	1	0.29	0.43	0	0.15	0.68	0.59	0.74	0.3	0.38	0	0	0.1	0	0	0	0	0	0	0	0.15	0	1	1	1	1	1	1	1	1	1	1	1	1	0.59	0.15	0.19	0.44	0	0	0	0
ERR347610_ST1	ST1		0.73	1	1	1	1	1	0.29	0.43	0	0.15	0.68	0.59	0.74	0.3	0.38	0	0	0.1	0	0	0	0	0	0	0	0.15	0	1	1	1	1	1	1	1	1	1	1	1	1	0.59	0.15	0.19	0.44	0	0	0	0
ERR347611_ST1	ST1		0.73	1	1	1	1	1	0.29	0.43	0	0.25	0.68	0.59	0.74	0.3	0.38	0	0	0.1	0	0	0	0	0	0	0	0.15	0	1	1	1	1	1	1	1	1	1	1	1	1	0.59	0.15	0.19	0.44	0	0	0	0
ERR347612_ST1	ST1		0.73	1	1	1	1	1	0.29	0.43	0	0.15	0.68	0.59	0.74	0.3	0.38	0	0	0.1	0	0	0	0	0	0	0	0.15	0	1	1	1	1	1	1	1	1	1	1	1	1	0.59	0.15	0.19	0.44	0	0	0	0
ERR347616_ST1	ST1		0.73	1	1	1	1	1	0.29	0.43	0	0.15	0.68	0.59	0.74	0.3	0.38	0	0	0.1	0	0	0	0	0	0	0	0.15	0	1	1	1	1	1	1	1	1	1	1	1	1	0.59	0.15	0.19	0.44	0	0	0	0
ERR347617_ST1	ST1		0.73	1	1	1	1	1	0.29	0.43	0	0.15	0.68	0.59	0.74	0.3	0.38	0	0	0.1	0	0	0	0	0	0	0	0.15	0	1	1	1	1	1	1	1	1	1	1	1	1	0.59	0.15	0.19	0.44	0	0	0	0
ERR347621_ST1	ST1		0.73	1	1	1	1	1	0.29	0.43	0	0.15	0.68	0.59	0.74	0.3	0.38	0	0	0.1	0	0	0	0	0	0	0	0.15	0	1	1	1	1	1	1	1	1	1	1	1	1	0.59	0.15	0.19	0.44	0	0	0	0
ERR347622_ST1	ST1		0.73	1	1	1	1	1	0.29	0.43	0	0.15	0.68	0.59	0.74	0.3	0.38	0	0	0.1	0	0	0	0	0	0	0	0.15	0	1	1	1	1	1	1	1	1	1	1	1	1	0.59	0.15	0.19	0.44	0	0	0	0
ERR347623_ST1	ST1		0.73	1	1	1	1	1	0.29	0.43	0	0.15	0.68	0.59	0.74	0.3	0.38	0	0	0.1	0	0	0	0	0	0	0	0.15	0	1	1	1	1	1	1	1	1	1	1	1	1	0.59	0.15	0.19	0.44	0	0	0	0
ERR347624_ST1	ST1		0.73	1	1	1	1	1	0.29	0.43	0	0.15	0.68	0.59	0.74	0.3	0.38	0	0	0.1	0	0	0	0	0	0	0	0.15	0	1	1	1	1	1	1	1	1	1	1	1	1	0.59	0.15	0.19	0.44	0	0	0	0
ERR347625_ST1	ST1		0.73	1	1	1	1	1	0.29	0.43	0	0.15	0.68	0.59	0.74	0.3	0.38	0	0	0.1	0	0	0	0	0	0	0	0.15	0	1	1	1	1	1	1	1	1	1	1	1	1	0.59	0.15	0.19	0.44	0	0	0	0
ERR347626_ST1	ST1		0.73	1	1	1	1	1	0.29	0.43	0	0.15	0.68	0.59	0.74	0.3	0.38	0	0	0.1	0	0	0	0	0	0	0	0.15	0	1	1	1	1	1	1	1	1	1	1	1	1	0.59	0.15	0.19	0.44	0	0	0	0
ERR347627_ST1	ST1		0.73	1	1	1	1	1	0.29	0.43	0	0.15	0.68	0.59	0.74	0.3	0.38	0	0	0.1	0	0	0	0	0	0	0	0.15	0	1	1	1	1	1	1	1	1	1	1	1	1	0.59	0.15	0.19	0.44	0	0	0	0
ERR347628_ST1	ST1		0.73	1	1	1	1	1	0.29	0.43	0	0.15	0.68	0.59	0.74	0.3	0.38	0	0	0.1	0	0	0	0	0	0	0	0.15	0	1	1	1	1	1	1	1	1	1	1	1	1	0.59	0.15	0.19	0.44	0	0	0	0
ERR347629_ST1	ST1		0.73	1	1	1	1	1	0.29	0.43	0	0.15	0.68	0.59	0.74	0.3	0.38	0	0	0.1	0	0	0	0	0	0	0	0.15	0	1	1	1	1	1	1	1	1	1	1	1	1	0.59	0.15	0.19	0.44	0	0	0	0
ERR347630_ST1	ST1		0.73	1	1	1	1	1	0.29	0.43	0	0.15	0.68	0.59	0.74	0.3	0.38	0	0	0.1	0	0	0	0	0	0	0	0.15	0	1	1	1	1	1	1	1	1	1	1	1	1	0.59	0.15	0.19	0.44	0	0	0	0
ERR347631_ST1	ST1		0.73	1	1	1	1	1	0.29	0.43	0	0.15	0.68	0.59	0.74	0.3	0.38	0	0	0.1	0	0	0	0	0	0	0	0.15	0	1	1	1	1	1	1	1	1	1	1	1	1	0.59	0.15	0.19	0.44	0	0	0	0
ERR347632_ST1	ST1		0.73	1	1	1	1	1	0.29	0.43	0	0.15	0.68	0.59	0.74	0.3	0.38	0	0	0.1	0	0	0	0	0	0	0	0.15	0	1	1	1	1	1	1	1	1	1	1	1	1	0.59	0.15	0.19	0.44	0	0	0	0
ERR347634_ST1	ST1		0.73	1	1	1	1	1	0.29	0.43	0	0.15	0.68	0.59	0.74	0.3	0.38	0	0	0.1	0	0	0	0	0	0	0	0.15	0	1	1	1	1	1	1	1	1	1	1	1	1	0.59	0.15	0.19	0.44	0	0	0	0
ERR347635_ST1	ST1		0.73	1	1	1	1	1	0.29	0.43	0	0.15	0.68	0.59	0.74	0.3	0.38	0	0	0.1	0	0	0	0	0	0	0	0.15	0	1	1	1	1	1	1	1	1	1	1	1	1	0.59	0.15	0.19	0.44	0	0	0	0
ERR347636_ST1	ST1		0.73	1	1	1	1	1	0.29	0.43	0	0.15	0.68	0.59	0.74	0.3	0.38	0	0	0.1	0	0	0	0	0	0	0	0.15	0	1	1	1	1	1	1	1	1	1	1	1	1	0.59	0.15	0.19	0.44	0	0	0	0
ERR347637_ST1	ST1		0.73	1	1	1	1	1	0.29	0.43	0	0.15	0.68	0.59	0.74	0.3	0.38	0	0	0.1	0	0	0	0	0	0	0	0.15	0	1	1	1	1	1	1	1	1	1	1	1	1	0.59	0.15	0.19	0.44	0	0	0	0
ERR347638_ST1	ST1		0.73	1	1	1	1	1	0.29	0.43	0	0.15	0.68	0.59	0.74	0.3	0.38	0	0	0.1	0	0	0	0	0	0	0	0.15	0	1	1	1	1	1	1	1	1	1	1	1	1	0.59	0.15	0.19	0.44	0	0	0	0
ERR347639_ST1	ST1		0.73	1	1	1	1	1	0.29	0.43	0	0.15	0.68	0.59	0.74	0.3	0.38	0	0	0.1	0	0	0	0	0	0	0	0.15	0	1	1	1	1	1	1	1	1	1	1	1	1	0.59	0.15	0.19	0.44	0	0	0	0
ERR347640_ST1	ST1		0.73	1	1	1	1	1	0.29	0.43	0	0.15	0.68	0.59	0.74	0.3	0.38	0	0	0.1	0	0	0	0	0	0	0	0.15	0	1	1	1	1	1	1	1	1	1	1	1	1	0.59	0.15	0.19	0.44	0	0	0	0
ERR347641_ST1	ST1		0.73	1	1	1	1	1	0.29	0.43	0	0.15	0.68	0.59	0.74	0.3	0.38	0	0	0.1	0	0	0	0	0	0	0	0.15	0	1	1	1	1	1	1	1	1	1	1	1	1	0.59	0.15	0.19	0.44	0	0	0	0
ERR347642_ST1	ST1		0.73	1	1	1	1	1	0.29	0.43	0	0.15	0.68	0.59	0.74	0.3	0.38	0	0	0.1	0	0	0	0	0	0	0.13	0.44	0	1	1	1	1	1	1	1	1	1	1	1	1	0.59	0.15	0.19	0.44	0.19	0	0	0
ERR347644_ST1	ST1		0.73	1	1	1	1	1	0.29	0.43	0	0.15	0.68	0.59	0.74	0.3	0.38	0	0	0.1	0	0	0	0	0	0	0	0.15	0	1	1	1	1	1	1	1	1	1	1	1	1	0.59	0.15	0.19	0.44	0	0	0	0
ERR347645_ST1	ST1		0.73	1	1	1	1	1	0.29	0.43	0	0.15	0.68	0.59	0.74	0.3	0.38	0	0	0.1	0	0	0	0	0	0	0	0.15	0	1	1	1	1	1	1	1	1	1	1	1	1	0.59	0.15	0.19	0.44	0	0	0	0
ERR347646_ST1	ST1		0.73	1	1	1	1	1	0.29	0.43	0	0.15	0.68	0.59	0.74	0.3	0.38	0	0	0.1	0	0	0	0	0	0	0	0.15	0	1	1	1	1	1	1	1	1	1	1	1	1	0.59	0.15	0.19	0.44	0	0	0	0
ERR347647_ST1	ST1		0.73	1	1	1	1	1	0.29	0.43	0	0.15	0.68	0.59	0.74	0.3	0.38	0	0	0.1	0	0	0	0	0	0	0	0.15	0	1	1	1	1	1	1	1	1	1	1	1	1	0.59	0.15	0.19	0.44	0	0	0	0
ERR347648_ST1	ST1		0.73	1	1	1	1	1	0.29	0.43	0	0.15	0.68	0.59	0.74	0.3	0.38	0	0	0.1	0	0	0	0	0	0	0	0.15	0	1	1	1	1	1	1	1	1	1	1	1	1	0.59	0.15	0.19	0.44	0	0	0	0
ERR347649_ST1	ST1		0.73	1	1	1	1	1	0.29	0.43	0	0.15	0.68	0.59	0.74	0.3	0.38	0	0	0.1	0	0	0	0	0	0	0	0.15	0	1	1	1	1	1	1	1	1	1	1	1	1	0.59	0.15	0.19	0.44	0	0	0	0
ERR347650_ST1	ST1		0.73	1	1	1	1	1	0.29	0.43	0	0.15	0.68	0.59	0.74	0.3	0.38	0	0	0.1	0	0	0	0	0	0	0	0.15	0	1	1	1	1	1	1	1	1	1	1	1	1	0.59	0.15	0.19	0.44	0	0	0	0
ERR347651_ST1	ST1		0.73	1	1	1	1	1	0.29	0.43	0	0.15	0.68	0.59	0.74	0.3	0.38	0	0	0.1	0	0	0	0	0	0	0	0.15	0	1	1	1	1	1	1	1	1	1	1	1	1	0.59	0.15	0.19	0.44	0	0	0	0
ERR347652_ST1	ST1		0.73	1	1	1	1	1	0.29	0.43	0	0.15	0.68	0.59	0.74	0.3	0.38	0	0	0.1	0	0	0	0	0	0	0	0.15	0	1	1	1	1	1	1	1	1	1	1	1	1	0.59	0.15	0.19	0.44	0	0	0	0
ERR347653_ST1	ST1		0.73	1	1	1	1	1	0.29	0.43	0	0.15	0.68	0.59	0.74	0.3	0.38	0	0	0.1	0	0	0	0	0	0	0	0.15	0	1	1	1	1	1	1	1	1	1	1	1	1	0.59	0.15	0.19	0.44	0	0	0	0
ERR347654_ST1	ST1		0.73	1	1	1	1	1	0.29	0.43	0	0.15	0.68	0.59	0.74	0.3	0.38	0	0	0.1	0	0	0	0	0	0	0	0.15	0	1	1	1	1	1	1	1	1	1	1	1	1	0.59	0.15	0.19	0.44	0	0	0	0
ERR347655_ST1	ST1		0.73	1	1	1	1	1	0.29	0.43	0	0.15	0.68	0.59	0.74	0.3	0.38	0	0	0.1	0	0	0	0	0	0	0	0.15	0	1	1	1	1	1	1	1	1	1	1	1	1	0.59	0.15	0.19	0.44	0	0	0	0
ERR347656_ST1	ST1		0.73	1	1	1	1	1	0.29	0.43	0	0.15	0.68	0.59	0.74	0.3	0.38	0	0	0.1	0	0	0	0	0	0	0	0.15	0	1	1	1	1	1	1	1	1	1	1	1	1	0.59	0.15	0.19	0.44	0	0	0	0
ERR347657_ST1	ST1		0.73	1	1	1	1	1	0.29	0.43	0	0.15	0.68	0.59	0.74	0.3	0.38	0	0	0.1	0	0	0	0	0	0	0	0.15	0	1	1	1	1	1	1	1	1	1	1	1	1	0.59	0.15	0.19	0.44	0	0	0	0
ERR347658_ST1	ST1		0.73	1	1	1	1	1	0.29	0.43	0	0.15	0.68	0.59	0.74	0.3	0.38	0	0	0.1	0	0	0	0	0	0	0	0.15	0	1	1	1	1	1	1	1	1	1	1	1	1	0.59	0.15	0.19	0.44	0	0	0	0
ERR347659_ST1	ST1		0.73	1	1	1	1	1	0.29	0.43	0	0.15	0.68	0.59	0.74	0.3	0.38	0	0	0.1	0	0	0	0	0	0	0	0.15	0	1	1	1	1	1	1	1	1	1	1	1	1	0.59	0.15	0.19	0.44	0	0	0	0
ERR347660_ST1	ST1		0.73	1	1	1	1	1	0.29	0.43	0	0.15	0.68	0.59	0.74	0.3	0.38	0	0	0.1	0	0	0	0	0	0	0	0.15	0	1	1	1	1	1	1	1	1	1	1	1	1	0.59	0.15	0.19	0.44	0	0	0	0
ERR347661_ST1	ST1		0.73	1	1	1	1	1	0.29	0.43	0	0.15	0.68	0.59	0.74	0.3	0.38	0	0	0.1	0	0	0	0	0	0	0	0.15	0	1	1	1	1	1	1	1	1	1	1	1	1	0.59	0.15	0.19	0.44	0	0	0	0
ERR347662_ST1	ST1		0.73	1	1	1	1	1	0.29	0.43	0	0.15	0.68	0.59	0.74	0.3	0.38	0	0	0.1	0	0	0	0	0	0	0.13	0.44	0	1	1	1	1	1	1	1	1	1	1	1	1	0.59	0.15	0.19	0.44	0.19	0	0	0
ERR347664_ST1	ST1		0.73	1	1	1	1	1	0.29	0.43	0	0.15	0.68	0.59	0.74	0.3	0.38	0	0	0.1	0	0	0	0	0	0	0	0.15	0	1	1	1	1	1	1	1	1	1	1	1	1	0.59	0.15	0.19	0.44	0	0	0	0
ERR347665_ST1	ST1		0.73	1	1	1	1	1	0.29	0.43	0	0.15	0.68	0.59	0.74	0.3	0.38	0	0	0.1	0	0	0	0	0	0	0	0.15	0	1	1	1	1	1	1	1	1	1	1	1	1	0.59	0.15	0.19	0.44	0	0	0	0
ERR347666_ST1	ST1		0.73	1	1	1	1	1	0.29	0.43	0	0.15	0.68	0.59	0.74	0.3	0.38	0	0	0.1	0	0	0	0	0	0	0	0.15	0	1	1	1	1	1	1	1	1	1	1	1	1	0.59	0.15	0.19	0.44	0	0	0	0
ERR347667_ST1	ST1		0.73	1	1	1	1	1	0.29	0.43	0	0.15	0.68	0.59	0.74	0.3	0.38	0	0	0.1	0	0	0	0	0	0	0	0.15	0	1	1	1	1	1	1	1	1	1	1	1	1	0.59	0.15	0.19	0.44	0	0	0	0
ERR347668_ST1	ST1		0.73	1	1	1	1	1	0.29	0.43	0	0.15	0.68	0.59	0.74	0.3	0.38	0	0	0.1	0	0	0	0	0	0	0	0.15	0	1	1	1	1	1	1	1	1	1	1	1	1	0.59	0.15	0.19	0.44	0	0	0	0
ERR347669_ST1	ST1		0.73	1	1	1	1	1	0.29	0.43	0	0.15	0.68	0.59	0.74	0.3	0.38	0	0	0.1	0	0	0	0	0	0	0	0.15	0	1	1	1	1	1	1	1	1	1	1	1	1	0.59	0.15	0.19	0.44	0	0	0	0
ERR347670_ST1	ST1		0.73	1	1	1	1	1	0.29	0.43	0	0.15	0.68	0.59	0.74	0.3	0.38	0	0	0.1	0	0	0	0	0	0	0	0.15	0	1	1	1	1	1	1	1	1	1	1	1	1	0.59	0.15	0.19	0.44	0	0	0	0
ERR347671_ST1	ST1		0.73	1	1	1	1	1	0.29	0.43	0	0.15	0.68	0.59	0.74	0.3	0.38	0	0	0.1	0	0	0	0	0	0	0	0.15	0	1	1	1	1	1	1	1	1	1	1	1	1	0.59	0.15	0.19	0.44	0	0	0	0
ERR347672_ST1	ST1		0.73	1	1	1	1	1	0.29	0.43	0	0.15	0.68	0.59	0.74	0.3	0.38	0	0	0.1	0	0	0	0	0	0	0	0.15	0	1	1	1	1	1	1	1	1	1	1	1	1	0.59	0.15	0.19	0.44	0	0	0	0
ERR347673_ST1	ST1		0.73	1	1	1	1	1	0.29	0.43	0	0.15	0.68	0.59	0.74	0.3	0.38	0	0	0.1	0	0	0	0	0	0	0.13	0.44	0	1	1	1	1	1	1	1	1	1	1	1	1	0.59	0.15	0.19	0.44	0.19	0	0	0
ERR347675_ST1	ST1		0.73	1	1	1	1	1	0.29	0.43	0	0.15	0.68	0.59	0.74	0.3	0.38	0	0	0.1	0	0	0	0	0	0	0	0.15	0	1	1	1	1	1	1	1	1	1	1	1	1	0.59	0.15	0.19	0.44	0	0	0	0
ERR347676_ST1	ST1		0.73	1	1	1	1	1	0.29	0.43	0	0.15	0.68	0.59	0.74	0.3	0.38	0	0	0.1	0	0	0	0	0	0	0	0.15	0	1	1	1	1	1	1	1	1	1	1	1	1	0.59	0.15	0.19	0.44	0	0	0	0
ERR347677_ST1	ST1		0.73	1	1	1	1	1	0.29	0.43	0	0.15	0.68	0.59	0.74	0.3	0.38	0	0	0.1	0	0	0	0	0	0	0	0.15	0	1	1	1	1	1	1	1	1	1	1	1	1	0.59	0.15	0.19	0.44	0	0	0	0
ERR347678_ST1	ST1		0.73	1	1	1	1	1	0.29	0.43	0	0.15	0.68	0.59	0.74	0.3	0.38	0	0	0.1	0	0	0	0	0	0	0	0.15	0	1	1	1	1	1	1	1	1	1	1	1	1	0.59	0.15	0.19	0.44	0	0	0	0
ERR347679_ST1	ST1		0.73	1	1	1	1	1	0.29	0.43	0	0.15	0.68	0.59	0.74	0.3	0.38	0	0	0.1	0	0	0	0	0	0	0	0.15	0	1	1	1	1	1	1	1	1	1	1	1	1	0.59	0.15	0.19	0.44	0	0	0	0
ERR347680_ST1	ST1		0.73	1	1	1	1	1	0.29	0.43	0	0.15	0.68	0.59	0.74	0.3	0.38	0	0	0.1	0	0	0	0	0	0	0	0.15	0	1	1	1	1	1	1	1	1	1	1	1	1	0.59	0.15	0.19	0.44	0	0	0	0
ERR347681_ST1	ST1		0.73	1	1	1	1	1	0.29	0.43	0	0.15	0.68	0.59	0.74	0.3	0.38	0	0	0.1	0	0	0	0	0	0	0	0.15	0	1	1	1	1	1	1	1	1	1	1	1	1	0.59	0.15	0.19	0.44	0	0	0	0
ERR347682_ST1	ST1		0.73	1	1	1	1	1	0.29	0.43	0	0.15	0.68	0.59	0.74	0.3	0.38	0	0	0.1	0	0	0	0	0	0	0	0.15	0	1	1	1	1	1	1	1	1	1	1	1	1	0.59	0.15	0.19	0.44	0	0	0	0
ERR347683_ST1	ST1		0.73	1	1	1	1	1	0.29	0.43	0	0.15	0.68	0.59	0.74	0.3	0.38	0	0	0.1	0	0	0	0	0	0	0	0.15	0	1	1	1	1	1	1	1	1	1	1	1	1	0.59	0.15	0.19	0.44	0	0	0	0
ERR347684_ST1	ST1		0.73	1	1	1	1	1	0.29	0.43	0	0.15	0.68	0.59	0.74	0.3	0.38	0	0	0.1	0	0	0	0	0	0	0	0.15	0	1	1	1	1	1	1	1	1	1	1	1	1	0.59	0.15	0.19	0.44	0	0	0	0
ERR347685_ST1	ST1		0.73	1	1	1	1	1	0.29	0.43	0	0.15	0.68	0.59	0.74	0.3	0.38	0	0	0.1	0	0	0	0	0	0	0.13	0.44	0	1	1	1	1	1	1	1	1	1	1	1	1	0.59	0.15	0.19	0.44	0.19	0	0	0
ERR347686_ST1	ST1		0.73	1	1	1	1	1	0.29	0.43	0	0.15	0.68	0.59	0.74	0.3	0.38	0	0	0.1	0	0	0	0	0	0	0	0.15	0	1	1	1	1	1	1	1	1	1	1	1	1	0.59	0.15	0.19	0.44	0	0	0	0
ERR347687_ST1	ST1		0.73	1	1	1	1	1	0.29	0.43	0	0.15	0.68	0.59	0.74	0.3	0.38	0	0	0.1	0	0	0	0	0	0	0	0.15	0	1	1	1	1	1	1	1	1	1	1	1	1	0.59	0.15	0.19	0.44	0	0	0	0
ERR347688_ST1	ST1		0.73	1	1	1	1	1	0.29	0.43	0	0.15	0.68	0.59	0.74	0.3	0.38	0	0	0.1	0	0	0.04	0	0	0	0	0.4	0	1	1	1	1	1	1	1	1	1	1	1	1	0.59	0.15	0.19	0.44	0.18	0.15	0	0.06
ERR347689_ST1	ST1		0.73	1	1	1	1	1	0.27	0	0	0.15	0.68	0.59	0.74	0.3	0.38	0	0	0.1	0	0	0	0	0	0	0	0.15	0	0	0.08	0	0	0.12	0.21	0.31	0.3	0.56	0.29	0.34	0	0	0.15	0.19	0.1	0	0	0	0
ERR347690_ST1	ST1		0.73	1	1	1	1	1	0.29	0.43	0	0.15	0.68	0.59	0.74	0.3	0.38	0	0	0.1	0	0	0	0	0	0	0	0.15	0	1	1	1	1	1	1	1	1	1	1	1	1	0.59	0.15	0.19	0.44	0	0	0	0
ERR347691_ST1	ST1		0.73	1	1	1	1	1	0.29	0.43	0	0.15	0.68	0.59	0.74	0.3	0.38	0	0	0.1	0	0	0	0	0	0	0	0.15	0	1	1	1	1	1	1	1	1	1	1	1	1	0.59	0.15	0.19	0.44	0	0	0	0
ERR347692_ST1	ST1		0.73	1	1	1	1	1	0.29	0.43	0	0.15	0.68	0.59	0.74	0.3	0.38	0	0	0.1	0	0	0	0	0	0	0	0.15	0	1	1	1	1	1	1	1	1	1	1	1	1	0.59	0.15	0.19	0.44	0	0	0	0
ERR347693_ST1	ST1		0.73	1	1	1	1	1	0.29	0.43	0	0.15	0.68	0.59	0.74	0.3	0.38	0	0	0.1	0	0	0	0	0	0	0	0.15	0	1	1	1	1	1	1	1	1	1	1	1	1	0.59	0.15	0.19	0.44	0	0	0	0
ERR347694_ST1	ST1		0.73	1	1	1	1	1	0.29	0.43	0	0.15	0.68	0.59	0.74	0.3	0.38	0	0	0.1	0	0	0	0	0	0	0	0.15	0	1	1	1	1	1	1	1	1	1	1	1	1	0.59	0.15	0.19	0.44	0	0	0	0
ERR347695_ST1	ST1		0.73	1	1	1	1	1	0.29	0.43	0	0.15	0.68	0.59	0.74	0.3	0.38	0	0	0.1	0	0	0	0	0	0	0.13	0.3	0	1	1	1	1	1	1	1	1	1	1	1	1	0.59	0.15	0.19	0.44	0.18	0	0	0
ERR347696_ST1	ST1		0.73	1	1	1	1	1	0.29	0.43	0	0.15	0.68	0.59	0.74	0.3	0.38	0	0	0.1	0	0	0	0	0	0	0	0.15	0	1	1	1	1	1	1	1	1	1	1	1	1	0.59	0.15	0.19	0.44	0	0	0	0
ERR347697_ST1	ST1		0.73	1	1	1	1	1	0.29	0.43	0	0.15	0.68	0.59	0.74	0.3	0.38	0	0	0.1	0	0	0	0	0	0	0	0.15	0	1	1	1	1	1	1	1	1	1	1	1	1	0.59	0.15	0.19	0.44	0	0	0	0
ERR347698_ST1	ST1		0.73	1	1	1	1	1	0.29	0.43	0	0.15	0.68	0.59	0.74	0.3	0.38	0	0	0.1	0	0	0	0	0	0	0	0.15	0	1	1	1	1	1	1	1	1	1	1	1	1	0.59	0.15	0.19	0.44	0	0	0	0
ERR347699_ST1	ST1		0.73	1	1	1	1	1	0.29	0.43	0	0.15	0.68	0.59	0.74	0.3	0.38	0	0	0.1	0	0	0	0	0	0	0	0.15	0	1	1	1	1	1	1	1	1	1	1	1	1	0.59	0.15	0.19	0.44	0	0	0	0
ERR347700_ST1	ST1		0.73	1	1	1	1	1	0.29	0.43	0	0.15	0.68	0.59	0.74	0.3	0.38	0	0	0.1	0	0	0	0	0	0	0	0.15	0	1	1	1	1	1	1	1	1	1	1	1	1	0.59	0.15	0.19	0.44	0	0	0	0
ERR347701_ST1	ST1		0.73	1	1	1	1	1	0.29	0.43	0	0.15	0.68	0.59	0.74	0.3	0.38	0	0	0.1	0	0	0	0	0	0	0	0.15	0	1	1	1	1	1	1	1	1	1	1	1	1	0.59	0.15	0.19	0.44	0	0	0	0
ERR347702_ST1	ST1		0.73	1	1	1	1	1	0.29	0.43	0	0.15	0.68	0.59	0.74	0.3	0.38	0	0	0.1	0	0	0.33	0	0	0	0	0.15	0	1	1	1	1	1	1	1	1	1	1	1	1	1	1	1	1	1	0.99	0.99	1
ERR347703_ST1	ST1		0.73	1	1	1	1	1	0.29	0.43	0	0.15	0.68	0.59	0.74	0.3	0.38	0	0	0.1	0	0	0	0	0	0	0	0.15	0	1	1	1	1	1	1	1	1	1	1	1	1	0.59	0.15	0.19	0.44	0	0	0	0
ERR347704_ST1	ST1		0.73	1	1	1	1	1	0.29	0.43	0	0.15	0.68	0.59	0.74	0.3	0.38	0	0	0.1	0	0	0	0	0	0	0	0.15	0	1	1	1	1	1	1	1	1	1	1	1	1	0.59	0.15	0.19	0.44	0	0	0	0
ERR347705_ST1	ST1		0.73	1	1	1	1	1	0.29	0.43	0	0.15	0.68	0.59	0.74	0.3	0.38	0	0	0.1	0	0	0	0	0	0	0	0.15	0	1	1	1	1	1	1	1	1	1	1	1	1	0.59	0.15	0.19	0.44	0	0	0	0
ERR347706_ST1	ST1		0.73	1	1	1	1	1	0.29	0.43	0	0.15	0.68	0.59	0.74	0.3	0.38	0	0	0.1	0	0	0	0	0	0	0	0.15	0	1	1	1	1	1	1	1	1	1	1	1	1	0.59	0.15	0.19	0.44	0	0	0	0
ERR347707_ST1	ST1		0.73	1	1	1	1	1	0.29	0.43	0	0.15	0.68	0.59	0.74	0.3	0.38	0	0	0.1	0	0	0	0	0	0	0	0.15	0	1	1	1	1	1	1	1	1	1	1	1	1	0.59	0.15	0.19	0.44	0	0	0	0
ERR347708_ST1	ST1		0.73	1	1	1	1	1	0.29	0.43	0	0.15	0.68	0.59	0.74	0.3	0.38	0	0	0.1	0	0	0	0	0	0	0	0.15	0	1	1	1	1	1	1	1	1	1	1	1	1	0.59	0.15	0.19	0.44	0	0	0	0
ERR347710_ST1	ST1		0.73	1	1	1	1	1	0.29	0.43	0	0.17	0.68	0.59	0.74	0.3	0.38	0	0	0.1	0	0	0	0	0	0	0	0.15	0	1	1	1	1	1	1	1	1	1	1	1	1	0.59	0.15	0.19	0.44	0	0	0	0
ERR347711_ST1	ST1		0.73	1	1	1	1	1	0.29	0.43	0	0.15	0.68	0.59	0.74	0.3	0.38	0	0	0.1	0	0	0	0	0	0	0	0.15	0	1	1	1	1	1	1	1	1	1	1	1	1	0.59	0.15	0.19	0.44	0	0	0	0
ERR347712_ST1	ST1		0.73	1	1	1	1	1	0.29	0.43	0	0.15	0.68	0.59	0.74	0.3	0.38	0	0	0.1	0	0	0	0	0	0	0	0.15	0	1	1	1	1	1	1	1	1	1	1	1	1	0.59	0.15	0.19	0.44	0	0	0	0
ERR347713_ST1	ST1		0.73	1	1	1	1	1	0.29	0.43	0	0.15	0.68	0.59	0.74	0.3	0.38	0	0	0.1	0	0	0	0	0	0	0	0.15	0	1	1	1	1	1	1	1	1	1	1	1	1	0.59	0.15	0.19	0.44	0	0	0	0
ERR347714_ST1	ST1		0.73	1	1	1	1	1	0.29	0.43	0	0.15	0.68	0.59	0.74	0.3	0.38	0	0	0.1	0	0	0	0	0	0	0	0.15	0	1	1	1	1	1	1	1	1	1	1	1	1	0.59	0.15	0.19	0.44	0	0	0	0
ERR347716_ST1	ST1		0.73	1	1	1	1	1	0.29	0.43	0	0.15	0.68	0.59	0.74	0.3	0.38	0	0	0.1	0	0	0	0	0	0	0	0.15	0	1	1	1	1	1	1	1	1	1	1	1	1	0.59	0.15	0.19	0.44	0	0	0	0
ERR347717_ST1	ST1		0.73	1	1	1	1	1	0.29	0.43	0	0.15	0.68	0.59	0.74	0.3	0.38	0	0	0.1	0	0	0	0	0	0	0	0.15	0	1	1	1	1	1	1	1	1	1	1	1	1	0.59	0.15	0.19	0.44	0	0	0	0
ERR347718_ST1	ST1		0.73	1	1	1	1	1	0.29	0.43	0	0.15	0.68	0.59	0.74	0.3	0.38	0	0	0.1	0	0	0	0	0	0	0	0.15	0	1	1	1	1	1	1	1	1	1	1	1	1	0.59	0.15	0.19	0.44	0	0	0	0
ERR347719_ST1	ST1		0.73	1	1	1	1	1	0.29	0.43	0	0.15	0.68	0.59	0.74	0.3	0.38	0	0	0.1	0	0	0	0	0	0	0	0.15	0	1	1	1	1	1	1	1	1	1	1	1	1	0.59	0.15	0.19	0.44	0	0	0	0
ERR347722_ST1	ST1		0.73	1	1	1	1	1	0.29	0.43	0	0.15	0.68	0.59	0.74	0.3	0.38	0	0	0.1	0	0	0	0	0	0	0	0.15	0	1	1	1	1	1	1	1	1	1	1	1	1	0.59	0.15	0.19	0.44	0	0	0	0
ERR347723_ST1	ST1		0.73	1	1	1	1	1	0.29	0.43	0	0.15	0.68	0.59	0.74	0.3	0.38	0	0	0.1	0	0	0	0	0	0	0	0.15	0	1	1	1	1	1	1	1	1	1	1	1	1	0.59	0.15	0.19	0.44	0	0	0	0
ERR347724_ST1	ST1		0.73	1	1	1	1	1	0.29	0.43	0	0.25	0.68	0.59	0.74	0.3	0.38	0	0	0.1	0	0	0	0	0	0	0	0.15	0	1	1	1	1	1	1	1	1	1	1	1	1	0.59	0.15	0.19	0.44	0	0	0	0
ERR347725_ST1	ST1		0.73	1	1	1	1	1	0.29	0.43	0	0.15	0.68	0.59	0.74	0.3	0.38	0	0	0.1	0	0	0	0	0	0	0	0.15	0	1	1	1	1	1	1	1	1	1	1	1	1	0.59	0.15	0.19	0.44	0	0	0	0
ERR347728_ST1	ST1		0.73	1	1	1	1	1	0.29	0.43	0	0.15	0.68	0.59	0.74	0.3	0.38	0	0	0.1	0	0	0	0	0	0	0	0.15	0	1	1	1	1	1	1	1	1	1	1	1	1	0.59	0.15	0.19	0.44	0	0	0	0
ERR347729_ST1	ST1		0.73	1	1	1	1	1	0.29	0.43	0	0.15	0.68	0.59	0.74	0.3	0.38	0	0	0.1	0	0	0	0	0	0	0	0.15	0	1	1	1	1	1	1	1	1	1	1	1	1	0.59	0.15	0.19	0.44	0	0	0	0
ERR347730_ST1	ST1		0.73	1	1	1	1	1	0.29	0.43	0	0.15	0.68	0.59	0.74	0.3	0.38	0	0	0.1	0	0	0	0	0	0	0	0.15	0	1	1	1	1	1	1	1	1	1	1	1	1	0.59	0.15	0.19	0.44	0	0	0	0
ERR347731_ST1	ST1		0.73	1	1	1	1	1	0.29	0.43	0	0.16	0.68	0.59	0.74	0.3	0.38	0	0	0.1	0	0	0	0	0	0	0	0.15	0	1	1	1	1	1	1	1	1	1	1	1	1	0.59	0.15	0.19	0.44	0	0	0	0
ERR347734_ST1	ST1		0.73	1	1	1	1	1	0.29	0.43	0	0.15	0.68	0.59	0.74	0.3	0.38	0	0	0.1	0	0	0	0	0	0	0	0.15	0	1	1	1	1	1	1	1	1	1	1	1	1	0.59	0.15	0.19	0.44	0	0	0	0
ERR347735_ST1	ST1		0.73	1	1	1	1	1	0.29	0.43	0	0.15	0.68	0.59	0.74	0.3	0.38	0	0	0.1	0	0	0	0	0	0	0	0.15	0	1	1	1	1	1	1	1	1	1	1	1	1	0.59	0.15	0.19	0.44	0	0	0	0
ERR347736_ST1	ST1		0.73	1	1	1	1	1	0.29	0.43	0	0.15	0.68	0.59	0.74	0.3	0.38	0	0	0.1	0	0	0	0	0	0	0	0.15	0	1	1	1	1	1	1	1	1	1	1	1	1	0.59	0.15	0.19	0.44	0	0	0	0
ERR347737_ST1	ST1		0.73	1	1	1	1	1	0.29	0.43	0	0.15	0.68	0.59	0.74	0.3	0.38	0	0	0.1	0	0	0	0	0	0	0	0.15	0	1	1	1	1	1	1	1	1	1	1	1	1	0.59	0.15	0.19	0.44	0	0	0	0
ERR347738_ST1	ST1		0.73	1	1	1	1	1	0.29	0.43	0	0.15	0.68	0.59	0.74	0.3	0.38	0	0	0.1	0	0	0	0	0	0	0	0.15	0	1	1	1	1	1	1	1	1	1	1	1	1	0.59	0.15	0.19	0.44	0	0	0	0
ERR347740_ST1	ST1		0.73	1	1	1	1	1	0.29	0.43	0	0.15	0.68	0.59	0.74	0.3	0.38	0	0	0.1	0	0	0	0	0	0	0	0.15	0	1	1	1	1	1	1	1	1	1	1	1	1	0.59	0.15	0.19	0.44	0	0	0	0
ERR347741_ST1	ST1		0.73	1	1	1	1	1	0.27	0	0	0.15	0.68	0.59	0.74	0.3	0.38	0	0	0.1	0	0	0	0	0	0	0	0.15	0	0	0.08	0	0	0.12	0.21	0.31	0.3	0.23	0.29	0.34	0	0	0.15	0.19	0.1	0	0	0	0
ERR347742_ST1	ST1		0.73	1	1	1	1	1	0.29	0.43	0	0.15	0.68	0.59	0.74	0.3	0.38	0	0	0.1	0	0	0	0	0	0	0	0.15	0	1	1	1	1	1	1	1	1	1	1	1	1	0.59	0.15	0.19	0.44	0	0	0	0
ERR347743_ST1	ST1		0.73	1	1	1	1	1	0.29	0.43	0	0.15	0.68	0.59	0.74	0.3	0.38	0	0	0.1	0	0	0	0	0	0	0	0.15	0	1	1	1	1	1	1	1	1	1	1	1	1	0.59	0.15	0.19	0.44	0	0	0	0
ERR347744_ST1	ST1		0.73	1	1	1	1	1	0.29	0.43	0	0.15	0.68	0.59	0.74	0.3	0.38	0	0	0.1	0	0	0	0	0	0	0	0.15	0	1	1	1	1	1	1	1	1	1	1	1	1	0.59	0.15	0.19	0.44	0	0	0	0
ERR347747_ST1	ST1		0.73	1	1	1	1	1	0.29	0.43	0	0.15	0.68	0.59	0.74	0.3	0.38	0	0	0.1	0	0	0	0	0	0	0	0.15	0	1	1	1	1	1	1	1	1	1	1	1	1	0.59	0.15	0.19	0.44	0	0	0	0
ERR347748_ST1	ST1		0.73	1	1	1	1	1	0.29	0.43	0	0.15	0.68	0.59	0.74	0.3	0.38	0	0	0.1	0	0	0.33	0	0	0	0	0.15	0	1	1	1	1	1	1	1	1	1	1	1	1	1	1	1	1	1	0.99	0.99	1
ERR347749_ST1	ST1		0.73	1	1	1	1	1	0.29	0.43	0	0.15	0.68	0.59	0.74	0.3	0.38	0	0	0.1	0	0	0	0	0	0	0	0.15	0	1	1	1	1	1	1	1	1	1	1	1	1	0.59	0.15	0.19	0.44	0	0	0	0
ERR347750_ST1	ST1		0.73	1	1	1	1	1	0.29	0.43	0	0.15	0.68	0.59	0.74	0.3	0.38	0	0	0.1	0	0	0	0	0	0	0	0.15	0	1	1	1	1	1	1	1	1	1	1	1	1	0.59	0.15	0.19	0.44	0	0	0	0
ERR347751_ST1	ST1		0.73	1	1	1	1	1	0.29	0.43	0	0.15	0.68	0.59	0.74	0.3	0.38	0	0	0.1	0	0	0	0	0	0	0	0.15	0	1	1	1	1	1	1	1	1	1	1	1	1	0.59	0.15	0.19	0.44	0	0	0	0
ERR347752_ST1	ST1		0.73	1	1	1	1	1	0.29	0.43	0	0.15	0.68	0.59	0.74	0.3	0.38	0	0	0.1	0	0	0	0	0	0	0	0.15	0	1	1	1	1	1	1	1	1	1	1	1	1	0.59	0.15	0.19	0.44	0	0	0	0
ERR347753_ST1	ST1		0.73	1	1	1	1	1	0.29	0.43	0	0.15	0.68	0.59	0.74	0.3	0.38	0	0	0.1	0	0	0	0	0	0	0	0.15	0	1	1	1	1	1	1	1	1	1	1	1	1	0.59	0.15	0.19	0.44	0	0	0	0
ERR347754_ST1	ST1		0.73	1	1	1	1	1	0.29	0.43	0	0.15	0.68	0.59	0.74	0.3	0.38	0	0	0.1	0	0	0	0	0	0	0	0.15	0	1	1	1	1	1	1	1	1	1	1	1	1	0.59	0.15	0.19	0.44	0	0	0	0
ERR347755_ST1	ST1		0.73	1	1	1	1	1	0.29	0.43	0	0.15	0.68	0.59	0.74	0.3	0.38	0	0	0.1	0	0	0	0	0	0	0	0.15	0	1	1	1	1	1	1	1	1	1	1	1	1	0.59	0.15	0.19	0.44	0	0	0	0
ERR347756_ST1	ST1		0.73	1	1	1	1	1	0.29	0.43	0	0.15	0.68	0.59	0.74	0.3	0.38	0	0	0.1	0	0	0	0	0	0	0	0.15	0	1	1	1	1	1	1	1	1	1	1	1	1	0.59	0.15	0.19	0.44	0	0	0	0
ERR347759_ST1	ST1		0.73	1	1	1	1	1	0.29	0.43	0	0.15	0.68	0.59	0.74	0.3	0.38	0	0	0.1	0	0	0	0	0	0	0	0.15	0	1	1	1	1	1	1	1	1	1	1	1	1	0.59	0.15	0.19	0.44	0	0	0	0
ERR347760_ST1	ST1		0.73	1	1	1	1	1	0.29	0.43	0	0.15	0.68	0.59	0.74	0.3	0.38	0	0	0.1	0	0	0.33	0	0	0	0	0.15	0	1	1	1	1	1	1	1	1	1	1	1	1	1	1	1	1	1	0.99	0.99	1
ERR347761_ST1	ST1		0.73	1	1	1	1	1	0.29	0.43	0	0.15	0.68	0.59	0.74	0.3	0.38	0	0	0.1	0	0	0	0	0	0	0	0.15	0	1	1	1	1	1	1	1	1	1	1	1	1	0.59	0.15	0.19	0.44	0	0	0	0
ERR347762_ST1	ST1		0.73	1	1	1	1	1	0.29	0.43	0	0.15	0.68	0.59	0.74	0.3	0.38	0	0	0.1	0	0	0	0	0	0	0	0.15	0	1	1	1	1	1	1	1	1	1	1	1	1	0.59	0.15	0.19	0.44	0	0	0	0
ERR347763_ST1	ST1		0.73	1	1	1	1	1	0.29	0.43	0	0.15	0.68	0.59	0.74	0.3	0.38	0	0	0.1	0	0	0	0	0	0	0	0.15	0	1	1	1	1	1	1	1	1	1	1	1	1	0.59	0.15	0.19	0.44	0	0	0	0
ERR347764_ST1	ST1		0.73	1	1	1	1	1	1	1	1	1	1	1	1	1	1	1	1	1	1	0.99	1	1	1	1	1	1	1	1	1	1	1	1	1	1	1	1	1	1	1	1	1	1	1	1	0.99	0.99	1
ERR347765_ST1	ST1		0.73	1	1	1	1	1	0.29	0.43	0	0.15	0.68	0.59	0.74	0.3	0.38	0	0	0.1	0	0	0	0	0	0	0	0.15	0	1	1	1	1	1	1	1	1	1	1	1	1	0.59	0.15	0.19	0.44	0	0	0	0
ERR347766_ST1	ST1		0.73	1	1	1	1	1	0.29	0.43	0	0.15	0.68	0.59	0.74	0.3	0.38	0	0	0.1	0	0	0	0	0	0	0	0.15	0	1	1	1	1	1	1	1	1	1	1	1	1	0.59	0.15	0.19	0.44	0	0	0	0
ERR347767_ST1	ST1		0.73	1	1	1	1	1	0.29	0.43	0	0.15	0.68	0.59	0.74	0.3	0.38	0	0	0.1	0	0	0	0	0	0	0	0.15	0	1	1	1	1	1	1	1	1	1	1	1	1	0.59	0.15	0.19	0.44	0	0	0	0
ERR347770_ST1	ST1		0.73	1	1	1	1	1	0.29	0.43	0	0.15	0.68	0.59	0.74	0.3	0.38	0	0	0.1	0	0	0	0	0	0	0	0.15	0	1	1	1	1	1	1	1	1	1	1	1	1	0.59	0.15	0.19	0.44	0	0	0	0
ERR347771_ST1	ST1		0.73	1	1	1	1	1	0.29	0.43	0	0.15	0.68	0.59	0.74	0.3	0.38	0	0	0.1	0	0	0	0	0	0	0	0.15	0	1	1	1	1	1	1	1	1	1	1	1	1	0.59	0.15	0.19	0.44	0	0	0	0
ERR347772_ST1	ST1		0.73	1	1	1	1	1	0.29	0.43	0	0.15	0.68	0.59	0.74	0.3	0.38	0	0	0.1	0	0	0	0	0	0	0	0.15	0	1	1	1	1	1	1	1	1	1	1	1	1	0.59	0.15	0.19	0.44	0	0	0	0
ERR347773_ST1	ST1		0.73	1	1	1	1	1	0.29	0.43	0	0.15	0.68	0.59	0.74	0.3	0.38	0	0	0.1	0	0	0	0	0	0	0	0.15	0	1	1	1	1	1	1	1	1	1	1	1	1	0.59	0.15	0.19	0.44	0	0	0	0
ERR347774_ST1	ST1		0.73	1	1	1	1	1	0.29	0.43	0	0.15	0.68	0.59	0.74	0.3	0.38	0	0	0.1	0	0	0	0	0	0	0	0.15	0	1	1	1	1	1	1	1	1	1	1	1	1	0.59	0.15	0.19	0.44	0	0	0	0
ERR347775_ST1	ST1		0.73	1	1	1	1	1	0.29	0.43	0	0.15	0.68	0.59	0.74	0.3	0.38	0	0	0.1	0	0	0	0	0	0	0	0.15	0	1	1	1	1	1	1	1	1	1	1	1	1	0.59	0.15	0.19	0.44	0	0	0	0
ERR347776_ST1	ST1		0.73	1	1	1	1	1	0.29	0.43	0	0.15	0.68	0.59	0.74	0.3	0.38	0	0	0.1	0	0	0	0	0	0	0	0.15	0	1	1	1	1	1	1	1	1	1	1	1	1	0.59	0.15	0.19	0.44	0	0	0	0
ERR347777_ST1	ST1		0.73	1	1	1	1	1	0.29	0.43	0	0.15	0.68	0.59	0.74	0.3	0.38	0	0	0.1	0	0	0	0	0	0	0	0.15	0	1	1	1	1	1	1	1	1	1	1	1	1	0.59	0.15	0.19	0.44	0	0	0	0
ERR347778_ST1	ST1		0.73	1	1	1	1	1	0.29	0.43	0	0.15	0.68	0.59	0.74	0.3	0.38	0	0	0.1	0	0	0	0	0	0	0	0.15	0	1	1	1	1	1	1	1	1	1	1	1	1	0.59	0.15	0.19	0.44	0	0	0	0
ERR347780_ST1	ST1		0.73	1	1	1	1	1	0.29	0.43	0	0.15	0.68	0.59	0.74	0.3	0.38	0	0	0.1	0	0	0	0	0	0	0	0.15	0	1	1	1	1	1	1	1	1	1	1	1	1	0.59	0.15	0.19	0.44	0	0	0	0
ERR347781_ST1	ST1		0.73	1	1	1	1	1	0.29	0.43	0	0.15	0.68	0.59	0.74	0.3	0.38	0	0	0.1	0	0	0	0	0	0	0	0.15	0	1	1	1	1	1	1	1	1	1	1	1	1	0.59	0.15	0.19	0.44	0	0	0	0
ERR347782_ST1	ST1		0.73	1	1	1	1	1	0.29	0.43	0	0.15	0.68	0.59	0.74	0.3	0.38	0	0	0.1	0	0	0	0	0	0	0	0.15	0	1	1	1	1	1	1	1	1	1	1	1	1	0.59	0.15	0.19	0.44	0	0	0	0
ERR347783_ST1	ST1		0.73	1	1	1	1	1	0.29	0.43	0	0.15	0.68	0.59	0.74	0.3	0.38	0	0	0.1	0	0	0	0	0	0	0	0.15	0	1	1	1	1	1	1	1	1	1	1	1	1	0.59	0.15	0.19	0.44	0	0	0	0
ERR347784_ST1	ST1		0.73	1	1	1	1	1	0.29	0.43	0	0.15	0.68	0.59	0.74	0.3	0.38	0	0	0.1	0	0	0	0	0	0	0	0.15	0	1	1	1	1	1	1	1	1	1	1	1	1	0.59	0.15	0.19	0.44	0	0	0	0
ERR347785_ST1	ST1		0.73	1	1	1	1	1	0.29	0.43	0	0.15	0.68	0.59	0.74	0.3	0.38	0	0	0.1	0	0	0	0	0	0	0	0.15	0	1	1	1	1	1	1	1	1	1	1	1	1	0.59	0.15	0.19	0.44	0	0	0	0
ERR347786_ST1	ST1		0.73	1	1	1	1	1	0.29	0.43	0	0.15	0.68	0.59	0.74	0.3	0.38	0	0	0.1	0	0	0	0	0	0	0	0.15	0	1	1	1	1	1	1	1	1	1	1	1	1	0.59	0.15	0.19	0.44	0	0	0	0
ERR347787_ST1	ST1		0.73	1	1	1	1	1	0.29	0.43	0	0.15	0.68	0.59	0.74	0.3	0.38	0	0	0.1	0	0	0	0	0	0	0	0.15	0	1	1	1	1	1	1	1	1	1	1	1	1	0.59	0.15	0.19	0.44	0	0	0	0
ERR347788_ST1	ST1		0.73	1	1	1	1	1	0.29	0.43	0	0.15	0.68	0.59	0.74	0.3	0.38	0	0	0.1	0	0	0	0	0	0	0	0.15	0	1	1	1	1	1	1	1	1	1	1	1	1	0.59	0.15	0.19	0.44	0	0	0	0
ERR347789_ST1	ST1		0.73	1	1	1	1	1	0.29	0.43	0	0.15	0.68	0.59	0.74	0.3	0.38	0	0	0.1	0	0	0	0	0	0	0	0.15	0	1	1	1	1	1	1	1	1	1	1	1	1	0.59	0.15	0.19	0.44	0	0	0	0
ERR347792_ST1	ST1		0.73	1	1	1	1	1	0.29	0.43	0	0.15	0.68	0.59	0.74	0.3	0.38	0	0	0.1	0	0	0	0	0	0	0	0.15	0	1	1	1	1	1	1	1	1	1	1	1	1	0.59	0.15	0.19	0.44	0	0	0	0
ERR347793_ST1	ST1		0.73	1	1	1	1	1	0.29	0.43	0	0.15	0.68	0.59	0.74	0.3	0.38	0	0	0.1	0	0	0	0	0	0	0	0.15	0	1	1	1	1	1	1	1	1	1	1	1	1	0.59	0.15	0.19	0.44	0	0	0	0
ERR347794_ST1	ST1		0.73	1	1	1	1	1	0.29	0.43	0	0.15	0.68	0.59	0.74	0.3	0.38	0	0	0.1	0	0	0	0	0	0	0	0.15	0	1	1	1	1	1	1	1	1	1	1	1	1	0.59	0.15	0.19	0.44	0	0	0	0
ERR347795_ST1	ST1		0.73	1	1	1	1	1	0.29	0.43	0	0.15	0.68	0.59	0.74	0.3	0.38	0	0	0.1	0	0	0	0	0	0	0	0.15	0	1	1	1	1	1	1	1	1	1	1	1	1	0.59	0.15	0.19	0.44	0	0	0	0
ERR347796_ST1	ST1		0.73	1	1	1	1	1	0.29	0.43	0	0.15	0.68	0.59	0.74	0.3	0.38	0	0	0.1	0	0	0	0	0	0	0	0.15	0	1	1	1	1	1	1	1	1	1	1	1	1	0.59	0.15	0.19	0.44	0	0	0	0
ERR347797_ST1	ST1		0.73	1	1	1	1	1	0.29	0.43	0	0.15	0.68	0.59	0.74	0.3	0.38	0	0	0.1	0	0	0	0	0	0	0	0.15	0	1	1	1	1	1	1	1	1	1	1	1	1	0.59	0.15	0.19	0.44	0	0	0	0
ERR347798_ST1	ST1		0.73	1	1	1	1	1	0.29	0.43	0	0.15	0.68	0.59	0.74	0.3	0.38	0	0	0.1	0	0	0	0	0	0	0	0.15	0	1	1	1	1	1	1	1	1	1	1	1	1	0.59	0.15	0.19	0.44	0	0	0	0
ERR347799_ST1	ST1		0.73	1	1	1	1	1	0.29	0.43	0	0.15	0.68	0.59	0.74	0.3	0.38	0	0	0.1	0	0	0	0	0	0	0	0.15	0	1	1	1	1	1	1	1	1	1	1	1	1	0.59	0.15	0.19	0.44	0	0	0	0
ERR347800_ST1	ST1		0.73	1	1	1	1	1	0.29	0.43	0	0.15	0.68	0.59	0.74	0.3	0.38	0	0	0.1	0	0	0	0	0	0	0	0.15	0	1	1	1	1	1	1	1	1	1	1	1	1	0.59	0.15	0.19	0.44	0	0	0	0
ERR347801_ST1	ST1		0.73	1	1	1	1	1	0.29	0.43	0	0.15	0.68	0.59	0.74	0.3	0.38	0	0	0.1	0	0	0	0	0	0	0	0.15	0	1	1	1	1	1	1	1	1	1	1	1	1	0.59	0.15	0.19	0.44	0	0	0	0
ERR347804_ST1	ST1		0.73	1	1	1	1	1	0.29	0.43	0	0.15	0.68	0.59	0.74	0.3	0.38	0	0	0.1	0	0	0	0	0	0	0	0.15	0	1	1	1	1	1	1	1	1	1	1	1	1	0.59	0.15	0.19	0.44	0	0	0	0
ERR347805_ST1	ST1		0.73	1	1	1	1	1	0.29	0.43	0	0.15	0.68	0.59	0.74	0.3	0.38	0	0	0.1	0	0	0	0	0	0	0	0.15	0	1	1	1	1	1	1	1	1	1	1	1	1	0.59	0.15	0.19	0.44	0	0	0	0
ERR347806_ST1	ST1		0.73	1	1	1	1	1	0.29	0.43	0	0.15	0.68	0.59	0.74	0.3	0.38	0	0	0.1	0	0	0	0	0	0	0	0.15	0	1	1	1	1	1	1	1	1	1	1	1	1	0.59	0.15	0.19	0.44	0	0	0	0
ERR347807_ST1	ST1		0.73	1	1	1	1	1	0.29	0.43	0	0.15	0.68	0.59	0.74	0.3	0.38	0	0	0.1	0	0	0	0	0	0	0	0.15	0	1	1	1	1	1	1	1	1	1	1	1	1	0.59	0.15	0.19	0.44	0	0	0	0
ERR347808_ST1	ST1		0.73	1	1	1	1	1	0.29	0.43	0	0.15	0.68	0.59	0.74	0.3	0.38	0	0	0.1	0	0	0	0	0	0	0	0.15	0	1	1	1	1	1	1	1	1	1	1	1	1	0.59	0.15	0.19	0.44	0	0	0	0
ERR347809_ST1	ST1		0.73	1	1	1	1	1	0.29	0.43	0	0.15	0.68	0.59	0.74	0.3	0.38	0	0	0.1	0	0	0.33	0	0	0	0	0.15	0	1	1	1	1	1	1	1	1	1	1	1	1	1	1	1	1	1	0.99	0.99	1
ERR347810_ST1	ST1		0.73	1	1	1	1	1	0.29	0.43	0	0.15	0.68	0.59	0.74	0.3	0.38	0	0	0.1	0	0	0	0	0	0	0	0.15	0	1	1	1	1	1	1	1	1	1	1	1	1	0.59	0.15	0.19	0.44	0	0	0	0
ERR347811_ST1	ST1		0.73	1	1	1	1	1	0.29	0.43	0	0.15	0.68	0.59	0.74	0.3	0.38	0	0	0.1	0	0	0	0	0	0	0	0.15	0	1	1	1	1	1	1	1	1	1	1	1	1	0.59	0.15	0.19	0.44	0	0	0	0
ERR347812_ST1	ST1		0.73	1	1	1	1	1	0.29	0.43	0	0.15	0.68	0.59	0.74	0.3	0.38	0	0	0.1	0	0	0	0	0	0	0	0.15	0	1	1	1	1	1	1	1	1	1	1	1	1	0.59	0.15	0.19	0.44	0	0	0	0
ERR347813_ST1	ST1		0.73	1	1	1	1	1	0.29	0.43	0	0.15	0.68	0.59	0.74	0.3	0.38	0	0	0.1	0	0	0	0	0	0	0	0.15	0	1	1	1	1	1	1	1	1	1	1	1	1	0.59	0.15	0.19	0.44	0	0	0	0
ERR347816_ST1	ST1		0.73	1	1	1	1	1	0.29	0.43	0	0.15	0.68	0.59	0.74	0.3	0.38	0	0	0.1	0	0	0	0	0	0	0	0.15	0	1	1	1	1	1	1	1	1	1	1	1	1	0.59	0.15	0.19	0.44	0	0	0	0
ERR347817_ST1	ST1		0.73	1	1	1	1	1	0.29	0.43	0	0.15	0.68	0.59	0.74	0.3	0.38	0	0	0.1	0	0	0	0	0	0	0	0.15	0	1	1	1	1	1	1	1	1	1	1	1	1	0.59	0.15	0.19	0.44	0	0	0	0
ERR347818_ST1	ST1		0.73	1	1	1	1	1	0.29	0.43	0	0.15	0.68	0.59	0.74	0.3	0.38	0	0	0.1	0	0	0	0	0	0	0	0.15	0	1	1	1	1	1	1	1	1	1	1	1	1	0.59	0.15	0.19	0.44	0	0	0	0
ERR347819_ST1	ST1		0.73	1	1	1	1	1	0.29	0.43	0	0.15	0.68	0.59	0.74	0.3	0.38	0	0	0.1	0	0	0	0	0	0	0	0.15	0	1	1	1	1	1	1	1	1	1	1	1	1	0.59	0.15	0.19	0.44	0	0	0	0
ERR347820_ST1	ST1		0.73	1	1	1	1	1	0.29	0.43	0	0.15	0.68	0.59	0.74	0.3	0.38	0	0	0.1	0	0	0	0	0	0	0	0.15	0	1	1	1	1	1	1	1	1	1	1	1	1	0.59	0.15	0.19	0.44	0	0	0	0
ERR347821_ST1	ST1		0.73	1	1	1	1	1	0.29	0.43	0	0.15	0.68	0.59	0.74	0.3	0.38	0	0	0.1	0	0	0	0	0	0	0	0.15	0	1	1	1	1	1	1	1	1	1	1	1	1	0.59	0.15	0.19	0.44	0	0	0	0
ERR347822_ST1	ST1		0.73	1	1	1	1	1	0.29	0.43	0	0.15	0.68	0.59	0.74	0.3	0.38	0	0	0.1	0	0	0	0	0	0	0	0.15	0	1	1	1	1	1	1	1	1	1	1	1	1	0.59	0.15	0.19	0.44	0	0	0	0
ERR347823_ST1	ST1		0.73	1	1	1	1	1	0.29	0.43	0	0.15	0.68	0.59	0.74	0.3	0.38	0	0	0.1	0	0	0	0	0	0	0	0.15	0	1	1	1	1	1	1	1	1	1	1	1	1	0.59	0.15	0.19	0.44	0	0	0	0
ERR347824_ST1	ST1		0.73	1	1	1	1	1	0.29	0.43	0	0.15	0.68	0.59	0.74	0.3	0.38	0	0	0.1	0	0	0	0	0	0	0	0.15	0	1	1	1	1	1	1	1	1	1	1	1	1	0.59	0.15	0.19	0.44	0	0	0	0
ERR347825_ST1	ST1		0.73	1	1	1	1	1	0.29	0.43	0	0.15	0.68	0.59	0.74	0.3	0.38	0	0	0.1	0	0	0	0	0	0	0	0.15	0	1	1	1	1	1	1	1	1	1	1	1	1	0.59	0.15	0.19	0.44	0	0	0	0
ERR347828_ST1	ST1		0.73	1	1	1	1	1	0.29	0.43	0	0.15	0.68	0.59	0.74	0.3	0.38	0	0	0.1	0	0	0	0	0	0	0	0.15	0	1	1	1	1	1	1	1	1	1	1	1	1	0.59	0.15	0.19	0.44	0	0	0	0
ERR347829_ST1	ST1		0.73	1	1	1	1	1	0.29	0.43	0	0.15	0.68	0.59	0.74	0.3	0.38	0	0	0.1	0	0	0	0	0	0	0	0.15	0	1	1	1	1	1	1	1	1	1	1	1	1	0.59	0.15	0.19	0.44	0	0	0	0
ERR347830_ST1	ST1		0.73	1	1	1	1	1	0.29	0.43	0	0.15	0.68	0.59	0.74	0.3	0.38	0	0	0.1	0	0	0	0	0	0	0	0.15	0	1	1	1	1	1	1	1	1	1	1	1	1	0.59	0.15	0.19	0.44	0	0	0	0
ERR347831_ST1	ST1		0.73	1	1	1	1	1	0.29	0.43	0	0.15	0.68	0.59	0.74	0.3	0.38	0	0	0.1	0	0	0	0	0	0	0	0.15	0	1	1	1	1	1	1	1	1	1	1	1	1	0.59	0.15	0.19	0.44	0	0	0	0
ERR347832_ST1	ST1		0.73	1	1	1	1	1	0.29	0.43	0	0.15	0.68	0.59	0.74	0.3	0.38	0	0	0.1	0	0	0	0	0	0	0	0.15	0	1	1	1	1	1	1	1	1	1	1	1	1	0.59	0.15	0.19	0.44	0	0	0	0
ERR347833_ST1	ST1		0.73	1	1	1	1	1	0.29	0.43	0	0.15	0.68	0.59	0.74	0.3	0.38	0	0	0.1	0	0	0	0	0	0	0	0.15	0	1	1	1	1	1	1	1	1	1	1	1	1	0.59	0.15	0.19	0.44	0	0	0	0
ERR347834_ST1	ST1		0.73	1	1	1	1	1	0.29	0.43	0	0.15	0.68	0.59	0.74	0.3	0.38	0	0	0.1	0	0	0	0	0	0	0	0.15	0	1	1	1	1	1	1	1	1	1	1	1	1	0.59	0.15	0.19	0.44	0	0	0	0
ERR347835_ST1	ST1		0.73	1	1	1	1	1	0.29	0.43	0	0.15	0.68	0.59	0.74	0.3	0.38	0	0	0.1	0	0	0	0	0	0	0	0.15	0	1	1	1	1	1	1	1	1	1	1	1	1	0.59	0.15	0.19	0.44	0	0	0	0
ERR347929_ST1	ST1		0.73	1	1	1	1	1	0.29	0.43	0	0.15	0.68	0.59	0.74	0.3	0.38	0	0	0.1	0	0	0.33	0	0	0	0	0.15	0	1	1	1	1	1	1	1	1	1	1	1	1	1	1	1	1	1	0.99	0.99	1
ERR347930_ST1	ST1		0.73	1	1	1	1	1	0.29	0.43	0	0.15	0.68	0.59	0.74	0.3	0.38	0	0	0.1	0	0	0	0	0	0	0	0.15	0	1	1	1	1	1	1	1	1	1	1	1	1	0.59	0.15	0.19	0.44	0	0	0	0
ERR347931_ST1	ST1		0.73	1	1	1	1	1	0.29	0.43	0	0.15	0.68	0.59	0.74	0.3	0.38	0	0	0.1	0	0	0	0	0	0	0	0.15	0	1	1	1	1	1	1	1	1	1	1	1	1	0.59	0.15	0.19	0.44	0	0	0	0
ERR347933_ST1	ST1		0.73	1	1	1	1	1	0.29	0.43	0	0.15	0.68	0.59	0.74	0.3	0.38	0	0	0.1	0	0	0	0	0	0	0	0.15	0	1	1	1	1	1	1	1	1	1	1	1	1	0.59	0.15	0.19	0.44	0	0	0	0
ERR347934_ST1	ST1		0.73	1	1	1	1	1	0.29	0.43	0	0.15	0.68	0.59	0.74	0.3	0.38	0	0	0.1	0	0	0.33	0	0	0	0	0.15	0	1	1	1	1	1	1	1	1	1	1	1	1	1	1	1	1	1	0.99	0.99	1
ERR347935_ST1	ST1		0.73	1	1	1	1	1	0.29	0.43	0	0.15	0.68	0.59	0.74	0.3	0.38	0	0	0.1	0	0	0	0	0	0	0	0.15	0	1	1	1	1	1	1	1	1	1	1	1	1	0.59	0.15	0.19	0.44	0	0	0	0
ERR347936_ST1	ST1		0.73	1	1	1	1	1	0.29	0.43	0	0.15	0.68	0.59	0.74	0.3	0.38	0	0	0.1	0	0	0	0	0	0	0	0.15	0	1	1	1	1	1	1	1	1	1	1	1	1	0.59	0.15	0.19	0.44	0	0	0	0
ERR347947_ST1	ST1		0.73	1	1	1	1	1	0.29	0.43	0	0.15	0.68	0.59	0.74	0.3	0.38	0	0	0.1	0	0	0	0	0	0	0	0.15	0	1	1	1	1	1	1	1	1	1	1	1	1	0.59	0.15	0.19	0.44	0	0	0	0
ERR347950_ST1	ST1		0.73	1	1	1	1	1	0.29	0.43	0	0.19	0.68	0.59	0.74	0.3	0.38	0	0	0.1	0	0	0	0	0	0	0	0.15	0	1	1	1	1	1	1	1	1	1	1	1	1	0.59	0.15	0.19	0.44	0	0	0	0
ERR347951_ST1	ST1		0.73	1	1	1	1	1	0.29	0.43	0	0.15	0.68	0.59	0.74	0.3	0.38	0	0	0.1	0	0	0.33	0	0	0	0	0.15	0	1	1	1	1	1	1	1	1	1	1	1	1	1	1	1	1	1	0.99	0.99	1
ERR347952_ST1	ST1		0.73	1	1	1	1	1	0.29	0.43	0	0.16	0.68	0.59	0.74	0.3	0.38	0	0	0.1	0	0	0	0	0	0	0	0.15	0	1	1	1	1	1	1	1	1	1	1	1	1	0.59	0.15	0.19	0.44	0	0	0	0
ERR347953_ST1	ST1		0.73	1	1	1	1	1	0.29	0.43	0	0.15	0.68	0.59	0.74	0.3	0.38	0	0	0.1	0	0	0	0	0	0	0	0.15	0	1	1	1	1	1	1	1	1	1	1	1	1	0.59	0.15	0.19	0.44	0	0	0	0
ERR347954_ST1	ST1		0.73	1	1	1	1	1	0.29	0.43	0	0.15	0.68	0.59	0.74	0.3	0.38	0	0	0.1	0	0	0	0	0	0	0	0.15	0	1	1	1	1	1	1	1	1	1	1	1	1	0.59	0.15	0.19	0.44	0	0	0	0
ERR347956_ST1	ST1		0.73	1	1	1	1	1	0.27	0	0	0.15	0.68	0.59	0.74	0.3	0.38	0	0	0.1	0	0.18	0	0	0	0	0	0.15	0	0	0.08	0	0	0.12	0.21	0.31	0.3	0.23	0.29	0.34	0	0	0.15	0.19	0.1	0	0	0	0
ERR347957_ST1	ST1		0.73	1	1	1	1	1	0.29	0.43	0	0.15	0.68	0.59	0.74	0.3	0.38	0	0	0.1	0	0	0	0	0	0	0	0.15	0	1	1	1	1	1	1	1	1	1	1	1	1	0.59	0.15	0.19	0.44	0	0	0	0
ERR347958_ST1	ST1		0.73	1	1	1	1	1	0.29	0.43	0	0.15	0.68	0.59	0.74	0.3	0.38	0	0	0.1	0	0	0	0	0	0	0	0.15	0	1	1	1	1	1	1	1	1	1	1	1	1	0.59	0.15	0.19	0.44	0	0	0	0
ERR347959_ST1	ST1		0.73	1	1	1	1	1	0.29	0.43	0	0.15	0.68	0.59	0.74	0.3	0.38	0	0	0.1	0	0	0	0	0	0	0	0.15	0	1	1	1	1	1	1	1	1	1	1	1	1	0.59	0.15	0.19	0.44	0	0	0	0
ERR347960_ST1	ST1		0.73	1	1	1	1	1	0.27	0	0	0.25	0.68	0.59	0.74	0.3	0.38	0	0	0.1	0	0	0	0	0	0	0	0.15	0	0	0.08	0	0	0.12	0.21	0.31	0.3	0.32	0.29	0.34	1	0	0.15	0.19	0.1	0	0	0	0
ERR347961_ST1	ST1		0.73	1	1	1	1	1	0.29	0.43	0	0.15	0.68	0.59	0.74	0.3	0.38	0	0	0.1	0	0	0	0	0	0	0	0.15	0	1	1	1	1	1	1	1	1	1	1	1	1	0.59	0.15	0.19	0.44	0	0	0	0
ERR347962_ST1	ST1		0.73	1	1	1	1	0.06	0.29	0.43	0	0.15	0.68	0.59	0.74	0.3	0.38	0	0	0.1	0	0	0	0	0	0	0	0.15	0	1	1	1	1	1	1	1	1	1	1	1	1	0.59	0.15	0.19	0.44	0	0	0	0
ERR347963_ST1	ST1		0.73	1	1	1	1	1	0.27	0	0	0.15	0.68	0.59	0.74	0.3	0.38	0	0	0.1	0	0	0	0	0	0	0	0.15	0	0	0.08	0	0	0.12	0.21	0.31	0.3	0.23	0.29	0.34	0	0	0.15	0.19	0.1	0	0	0	0
ERR347964_ST1	ST1		0.73	1	1	1	1	1	0.27	0	0	0.25	0.96	0.98	0.99	1	1	0.98	0	0.29	0.31	0	0	0	0	0.2	0	0.15	0	0	0.08	0	0	0.12	0.21	0.31	0.3	0.32	0.29	0.34	1	0	0.15	0.19	0.1	0	0	0	0.04
ERR347965_ST1	ST1		0.73	1	1	1	1	1	0.29	0.43	0	0.15	0.68	0.59	0.74	0.3	0.38	0	0	0.1	0	0	0	0	0	0	0	0.15	0	1	1	1	1	1	1	1	1	1	1	1	1	0.59	0.15	0.19	0.44	0	0	0	0
ERR347966_ST1	ST1		0.73	1	1	1	1	1	0.29	0.43	0	0.15	0.68	0.59	0.74	0.3	0.38	0	0	0.1	0	0	0	0	0	0	0	0.15	0	1	1	1	1	1	1	1	1	1	1	1	1	0.59	0.15	0.19	0.44	0	0	0	0
ERR347967_ST1	ST1		0.73	1	1	1	1	1	0.29	0.43	0	0.25	0.68	0.59	0.74	0.3	0.38	0	0	0.1	0	0.21	0.35	0	0	0	0	0.15	0	1	1	1	1	1	1	1	1	1	1	1	1	0.59	0.15	0.19	0.44	0	0.22	0	0.25
ERR347968_ST1	ST1		0.73	1	1	1	1	1	0.7	0.43	0	0.15	0.68	0.59	0.74	0.3	0.38	0	0	0.1	0	0	0	0	0	0	0	0.15	0	1	1	1	1	1	1	1	1	1	1	1	1	0.59	0.15	0.19	0.44	0	0	0	0
ERR347969_ST1	ST1		0.73	1	1	1	1	1	0.29	0.43	0	0.15	0.68	0.59	0.74	0.3	0.38	0	0	0.1	0	0	0	0	0	0	0	0.15	0	1	1	1	1	1	1	1	1	1	1	1	1	0.59	0.15	0.19	0.44	0	0	0	0
ERR347970_ST1	ST1		0.73	1	1	1	1	1	0.29	0.43	0	0.15	0.68	0.59	0.74	0.3	0.38	0	0	0.1	0	0	0	0	0	0	0	0.15	0	1	1	1	1	1	1	1	1	1	1	1	1	0.59	0.15	0.19	0.44	0	0	0	0
ERR347971_ST1	ST1		0.73	1	1	1	1	1	0.29	0.43	0	0.15	0.68	0.59	0.74	0.3	0.38	0	0	0.1	0	0	0	0	0	0	0	0.15	0	1	1	1	1	1	1	1	1	1	1	1	1	0.59	0.15	0.19	0.44	0	0	0	0
ERR347972_ST1	ST1		0.73	1	1	1	1	1	0.29	0.43	0	0.15	0.68	0.59	0.74	0.3	0.38	0	0	0.1	0	0	0	0	0	0	0	0.15	0	1	1	1	1	1	1	1	1	1	1	1	1	0.59	0.15	0.19	0.44	0	0	0	0
ERR347973_ST1	ST1		0.73	1	1	1	1	1	0.29	0.43	0	0.15	0.68	0.59	0.74	0.3	0.38	0	0	0.1	0	0	0	0	0	0	0	0.15	0	1	1	1	1	1	1	1	1	1	1	1	1	0.59	0.15	0.19	0.44	0	0	0	0
ERR347974_ST1	ST1		0.73	1	1	1	1	1	0.29	0.43	0	0.15	0.68	0.59	0.74	0.3	0.38	0	0	0.1	0	0	0	0	0	0	0	0.15	0	1	1	1	1	1	1	1	1	1	1	1	1	0.59	0.15	0.19	0.44	0	0	0	0
ERR347975_ST1	ST1		0.73	1	1	1	1	1	0.29	0.43	0	0.15	0.68	0.59	0.74	0.3	0.38	0	0	0.1	0	0	0	0	0	0	0	0.15	0	1	1	1	1	1	1	1	1	1	1	1	1	0.59	0.15	0.19	0.44	0	0	0	0
ERR347976_ST1	ST1		0.73	1	1	1	1	1	0.29	0.45	0	0.15	0.68	0.59	0.74	0.3	0.38	0	0	0.1	0	0	0	0	0	0	0	0.15	0	1	1	1	1	1	1	1	1	1	1	1	1	0.59	0.15	0.19	0.44	0.22	0	0	0
ERR347977_ST1	ST1		0.73	1	1	1	1	1	0.27	0	0	0.25	0.68	0.59	0.74	0.3	0.38	0	0	0.1	0	0	0	0	0	0	0	0.15	0	0	0.08	0	0	0.12	0.21	0.31	0.3	0.32	0.29	0.34	1	0	0.15	0.19	0.1	0	0	0	0
ERR347978_ST1	ST1		0.73	1	1	1	1	1	0.29	0.43	0	0.15	0.68	0.59	0.74	0.3	0.38	0	0	0.1	0	0	0	0	0	0	0	0.15	0	1	1	1	1	1	1	1	1	1	1	1	1	0.59	0.15	0.19	0.44	0	0	0	0
ERR347979_ST1	ST1		0.73	1	1	1	1	1	0.29	0.43	0	0.15	0.68	0.59	0.74	0.3	0.38	0	0	0.1	0	0	0	0	0	0	0	0.15	0	1	1	1	1	1	1	1	1	1	1	1	1	0.59	0.15	0.19	0.44	0	0	0	0
ERR347980_ST1	ST1		0.73	1	1	1	1	1	0.29	0.43	0	0.15	0.68	0.59	0.74	0.3	0.38	0	0	0.1	0	0	0	0	0	0	0	0.15	0	1	1	1	1	1	1	1	1	1	1	1	1	0.59	0.15	0.19	0.44	0	0	0	0
ERR347981_ST1	ST1		0.73	1	1	1	1	1	0.29	0.43	0	0.15	0.68	0.59	0.74	0.3	0.38	0	0	0.1	0	0	0	0	0	0	0	0.15	0	1	1	1	1	1	1	1	1	1	1	1	1	0.59	0.15	0.19	0.44	0	0	0	0
ERR347982_ST1	ST1		0.73	1	1	1	1	1	0.27	0	0	0.15	0.68	0.59	0.74	0.3	0.38	0	0	0.1	0	0	0	0	0	0	0	0.15	0	0	0.08	0	0	0.12	0.21	0.31	0.3	0.23	0.29	0.34	0	0	0.15	0.19	0.1	0	0	0	0
ERR347983_ST1	ST1		0.73	1	1	1	1	1	0.29	0.43	0	0.15	0.68	0.59	0.74	0.3	0.38	0	0	0.1	0	0	0	0	0	0	0	0.15	0	1	1	1	1	1	1	1	1	1	1	1	1	0.59	0.15	0.19	0.44	0	0	0	0
ERR347984_ST1	ST1		0.73	1	1	1	1	1	0.27	0	0	0.25	0.68	0.59	0.74	0.3	0.38	0	0	0.1	0	0	0	0	0	0	0	0.15	0	0	0.08	0	0	0.12	0.21	0.31	0.3	0.32	0.29	0.34	1	0	0.15	0.19	0.1	0	0	0	0
ERR347985_ST1	ST1		0.73	1	1	1	1	1	0.07	0	0	0.25	0.68	0.59	0.74	0.3	0.38	0	0	0.1	0	0	0	0	0	0	0	0.15	0	0	0.08	0	0	0.12	0.21	0.09	0.07	0.32	0.29	0.34	1	0	0.15	0.19	0.1	0	0	0	0
ERR347986_ST1	ST1		0.73	1	1	1	1	1	0.29	0.43	0	0.15	0.68	0.59	0.74	0.3	0.38	0	0	0.1	0	0	0	0	0	0	0	0.15	0	1	1	1	1	1	1	1	1	1	1	1	1	0.59	0.15	0.19	0.44	0	0	0	0
ERR347987_ST1	ST1		0.73	1	1	1	1	1	0.29	0.43	0	0.15	0.68	0.59	0.74	0.3	0.38	0	0	0.1	0	0	0	0	0	0	0	0.15	0	1	1	1	1	1	1	1	1	1	1	1	1	0.59	0.15	0.19	0.44	0	0	0	0
ERR347988_ST1	ST1		0.73	1	1	1	1	1	0.29	0.43	0	0.15	0.68	0.59	0.74	0.3	0.38	0	0	0.1	0	0	0	0	0	0	0	0.15	0	1	1	1	1	1	1	1	1	1	1	1	1	0.59	0.15	0.19	0.44	0	0	0	0
ERR347989_ST1	ST1		0.73	1	1	1	1	1	0.29	0.43	0	0.15	0.68	0.59	0.74	0.3	0.38	0	0	0.1	0	0	0	0	0	0	0	0.15	0	1	1	1	1	1	1	1	1	1	1	1	1	0.59	0.15	0.19	0.44	0	0	0	0
ERR347990_ST1	ST1		0.73	1	1	1	1	1	0.27	0	0	0.15	0.68	0.59	0.74	0.3	0.38	0	0	0.1	0	0.18	0	0	0	0	0	0.15	0	0	0.08	0	0	0.12	0.21	0.31	0.3	0.23	0.29	0.34	0	0	0.15	0.19	0.1	0	0	0	0
ERR347991_ST1	ST1		0.73	1	1	1	1	1	0.29	0.43	0	0.15	0.68	0.59	0.74	0.3	0.38	0	0	0.1	0	0	0	0	0	0	0	0.15	0	1	1	1	1	1	1	1	1	1	1	1	1	0.59	0.15	0.19	0.44	0	0	0	0
ERR348049_ST1	ST1		0.73	1	1	1	1	1	0.27	0	0	0.15	0.68	0.59	0.74	0.3	0.38	0	0	0.1	0	0.18	0	0	0	0	0	0.15	0	0	0.08	0	0	0.12	0.21	0.31	0.3	0.23	0.29	0.34	0	0	0.15	0.19	0.1	0	0	0	0
ERR348050_ST1	ST1		0.73	1	1	1	1	1	0.29	0.43	0	0.15	0.68	0.59	0.74	0.3	0.38	0	0	0.1	0	0	0	0	0	0	0	0.15	0	1	1	1	1	1	1	1	1	1	1	1	1	0.59	0.15	0.19	0.44	0	0	0	0
ERR348051_ST1	ST1		0.73	1	1	1	1	1	0.29	0.43	0	0.15	0.68	0.59	0.74	0.3	0.38	0	0	0.1	0	0	0	0	0	0	0	0.15	0	1	1	1	1	1	1	1	1	1	1	1	1	0.59	0.15	0.19	0.44	0	0	0	0
ERR348052_ST1	ST1		0.73	1	1	1	1	1	0.29	0.43	0	0.15	0.68	0.59	0.74	0.3	0.38	0	0	0.1	0	0	0	0	0	0	0	0.15	0	1	1	1	1	1	1	1	1	1	1	1	1	0.59	0.15	0.19	0.44	0	0	0	0
ERR348053_ST1	ST1		0.73	1	1	1	1	1	0.27	0	0	0.25	0.68	0.59	0.74	0.3	0.38	0	0	0.1	0	0	0	0	0	0	0	0.15	0	0	0.08	0	0	0.12	0.21	0.31	0.3	0.32	0.29	0.34	1	0	0.15	0.19	0.1	0	0	0	0
ERR348054_ST1	ST1		0.73	1	1	1	1	1	0.29	0.43	0	0.15	0.68	0.59	0.74	0.3	0.38	0	0	0.1	0	0	0	0	0	0	0	0.15	0	1	1	1	1	1	1	1	1	1	1	1	1	0.59	0.15	0.19	0.44	0	0	0	0
ERR348055_ST1	ST1		0.73	1	1	1	1	0.06	0.29	0.43	0	0.15	0.68	0.59	0.74	0.3	0.38	0	0	0.1	0	0	0	0	0	0	0	0.15	0	1	1	1	1	1	1	1	1	1	1	1	1	0.59	0.15	0.19	0.44	0	0	0	0
ERR348056_ST1	ST1		0.73	1	1	1	1	1	0.27	0	0	0.15	0.68	0.59	0.74	0.3	0.38	0	0	0.1	0	0	0	0	0	0	0	0.15	0	0	0.08	0	0	0.12	0.21	0.31	0.3	0.23	0.29	0.34	0	0	0.15	0.19	0.1	0	0	0	0
ERR348057_ST1	ST1		0.73	1	1	1	1	1	0.27	0	0	0.25	0.96	0.98	0.99	1	1	0.98	0	0.29	0.31	0	0	0	0	0.2	0	0.15	0	0	0.08	0	0	0.12	0.21	0.31	0.3	0.32	0.29	0.34	1	0	0.15	0.19	0.1	0	0	0	0.04
ERR348058_ST1	ST1		0.73	1	1	1	1	1	0.29	0.43	0	0.15	0.68	0.59	0.74	0.3	0.38	0	0	0.1	0	0.16	0	0	0	0	0	0.15	0	1	1	1	1	1	1	1	1	1	1	1	1	0.59	0.15	0.19	0.44	0	0	0	0
ERR348059_ST1	ST1		0.73	1	1	1	1	1	0.29	0.43	0	0.15	0.68	0.59	0.74	0.3	0.38	0	0	0.1	0	0	0	0	0	0	0	0.15	0	1	1	1	1	1	1	1	1	1	1	1	1	0.59	0.15	0.19	0.44	0	0	0	0
ERR348060_ST1	ST1		0.73	1	1	1	1	1	0.29	0.43	0	0.25	0.68	0.59	0.74	0.3	0.38	0	0	0.1	0	0.21	0.35	0	0	0	0	0.15	0	1	1	1	1	1	1	1	1	1	1	1	1	0.59	0.15	0.19	0.44	0	0.22	0	0.25
ERR348061_ST1	ST1		0.73	1	1	1	1	1	0.7	0.43	0	0.15	0.68	0.59	0.74	0.3	0.38	0	0	0.1	0	0	0	0	0	0	0	0.15	0	1	1	1	1	1	1	1	1	1	1	1	1	0.59	0.15	0.19	0.44	0	0	0	0
ERR348062_ST1	ST1		0.73	1	1	1	1	1	0.29	0.43	0	0.15	0.68	0.59	0.74	0.3	0.38	0	0	0.1	0	0	0	0	0	0	0	0.15	0	1	1	1	1	1	1	1	1	1	1	1	1	0.59	0.15	0.19	0.44	0	0	0	0
ERR348063_ST1	ST1		0.73	1	1	1	1	1	0.29	0.43	0	0.15	0.68	0.59	0.74	0.3	0.38	0	0	0.1	0	0	0	0	0	0	0	0.15	0	1	1	1	1	1	1	1	1	1	1	1	1	0.59	0.15	0.19	0.44	0	0	0	0
ERR348064_ST1	ST1		0.73	1	1	1	1	1	0.29	0.43	0	0.15	0.68	0.59	0.74	0.3	0.38	0	0	0.1	0	0	0	0	0	0	0	0.15	0	1	1	1	1	1	1	1	1	1	1	1	1	0.59	0.15	0.19	0.44	0	0	0	0
ERR348065_ST1	ST1		0.73	1	1	1	1	1	0.29	0.43	0	0.15	0.68	0.59	0.74	0.3	0.38	0	0	0.1	0	0	0	0	0	0	0	0.15	0	1	1	1	1	1	1	1	1	1	1	1	1	0.59	0.15	0.19	0.44	0	0	0	0
ERR348066_ST1	ST1		0.73	1	1	1	1	1	0.29	0.43	0	0.15	0.68	0.59	0.74	0.3	0.38	0	0	0.1	0	0	0	0	0	0	0	0.15	0	1	1	1	1	1	1	1	1	1	1	1	1	0.59	0.15	0.19	0.44	0	0	0	0
ERR348067_ST1	ST1		0.73	1	1	1	1	1	0.29	0.43	0	0.15	0.68	0.59	0.74	0.3	0.38	0	0	0.1	0	0	0	0	0	0	0	0.15	0	1	1	1	1	1	1	1	1	1	1	1	1	0.59	0.15	0.19	0.44	0	0	0	0
ERR348068_ST1	ST1		0.73	1	1	1	1	1	0.29	0.43	0	0.15	0.68	0.59	0.74	0.3	0.38	0	0	0.1	0	0	0	0	0	0	0	0.15	0	1	1	1	1	1	1	1	1	1	1	1	1	0.59	0.15	0.19	0.44	0	0	0	0
ERR348069_ST1	ST1		0.73	1	1	1	1	1	0.29	0.45	0	0.15	0.68	0.59	0.74	0.3	0.38	0	0	0.1	0	0	0	0	0	0	0	0.15	0	1	1	1	1	1	1	1	1	1	1	1	1	0.59	0.15	0.19	0.44	0.22	0	0	0
ERR348070_ST1	ST1		0.73	1	1	1	1	1	0.27	0	0	0.25	0.68	0.59	0.74	0.3	0.38	0	0	0.1	0	0	0	0	0	0	0	0.15	0	0	0.08	0	0	0.12	0.21	0.31	0.3	0.32	0.29	0.34	1	0	0.15	0.19	0.1	0	0	0	0
ERR348071_ST1	ST1		0.73	1	1	1	1	1	0.29	0.43	0	0.15	0.68	0.59	0.74	0.3	0.38	0	0	0.1	0	0	0	0	0	0	0	0.15	0	1	1	1	1	1	1	1	1	1	1	1	1	0.59	0.15	0.19	0.44	0	0	0	0
ERR348072_ST1	ST1		0.73	1	1	1	1	1	0.29	0.43	0	0.15	0.68	0.59	0.74	0.3	0.38	0	0	0.1	0	0	0	0	0	0	0	0.15	0	1	1	1	1	1	1	1	1	1	1	1	1	0.59	0.15	0.19	0.44	0	0	0	0
ERR348073_ST1	ST1		0.73	1	1	1	1	1	0.29	0.43	0	0.15	0.68	0.59	0.74	0.31	0.38	0	0	0.33	0.94	0	0	0	0	0	0	0.15	0	1	1	1	1	1	1	1	1	1	1	1	1	0.59	0.55	0.19	0.44	0	0	0	0
ERR348074_ST1	ST1		0.73	1	1	1	1	1	0.29	0.43	0	0.15	0.68	0.59	0.74	0.3	0.38	0	0	0.1	0	0	0	0	0	0	0	0.15	0	1	1	1	1	1	1	1	1	1	1	1	1	0.59	0.15	0.19	0.44	0	0	0	0
ERR348075_ST1	ST1		0.73	1	1	1	1	1	0.27	0	0	0.15	0.68	0.59	0.74	0.3	0.38	0	0	0.1	0	0	0	0	0	0	0	0.15	0	0	0.08	0	0	0.12	0.21	0.31	0.3	0.23	0.29	0.34	0	0	0.15	0.19	0.1	0	0	0	0
ERR348076_ST1	ST1		0.73	1	1	1	1	1	0.29	0.43	0	0.15	0.68	0.59	0.74	0.3	0.38	0	0	0.1	0	0	0	0	0	0	0	0.15	0	1	1	1	1	1	1	1	1	1	1	1	1	0.59	0.15	0.19	0.44	0	0	0	0
ERR348077_ST1	ST1		0.73	1	1	1	1	1	0.27	0	0	0.25	0.68	0.59	0.74	0.3	0.38	0	0	0.1	0	0	0	0	0	0	0	0.15	0	0	0.08	0	0	0.12	0.21	0.31	0.3	0.32	0.29	0.34	1	0	0.15	0.19	0.1	0	0	0	0
ERR348078_ST1	ST1		0.73	1	1	1	1	1	0.07	0	0	0.25	0.68	0.59	0.74	0.3	0.38	0	0	0.1	0	0	0	0	0	0	0	0.15	0	0	0.08	0	0	0.12	0.21	0.09	0.07	0.32	0.29	0.34	1	0	0.15	0.19	0.1	0	0	0	0
ERR348079_ST1	ST1		0.73	1	1	1	1	1	0.29	0.43	0	0.15	0.68	0.59	0.74	0.3	0.38	0	0	0.1	0	0	0	0	0	0	0	0.15	0	1	1	1	1	1	1	1	1	1	1	1	1	0.59	0.15	0.19	0.44	0	0	0	0
ERR348080_ST1	ST1		0.73	1	1	1	1	1	0.29	0.43	0	0.15	0.68	0.59	0.74	0.3	0.38	0	0	0.1	0	0	0	0	0	0	0	0.15	0	1	1	1	1	1	1	1	1	1	1	1	1	0.59	0.15	0.19	0.44	0	0	0	0
ERR348081_ST1	ST1		0.73	1	1	1	1	1	0.29	0.43	0	0.15	0.68	0.59	0.74	0.3	0.38	0	0	0.1	0	0	0	0	0	0	0	0.15	0	1	1	1	1	1	1	1	1	1	1	1	1	0.59	0.15	0.19	0.44	0	0	0	0
ERR348084_ST1	ST1		0.73	1	1	1	1	1	0.29	0.43	0	0.15	0.68	0.59	0.74	0.3	0.38	0	0	0.1	0	0	0	0	0	0	0	0.15	0	1	1	1	1	1	1	1	1	1	1	1	1	0.59	0.15	0.19	0.44	0	0	0	0
ERR348091_ST1	ST1		0.73	1	1	1	1	1	0.27	0	0	0.25	0.68	0.59	0.74	0.3	0.38	0	0	0.1	0	0.18	0	0	0	0	0	0.15	0	0	0.08	0	0	0.12	0.21	0.31	0.3	0.44	0.29	0.34	1	0	0.15	0.19	0.1	0	0	0	0
ERR348092_ST1	ST1		0.73	1	1	1	1	1	0.27	0	0	0.15	0.68	0.59	0.74	0.3	0.38	0	0	0.1	0	0.18	0	0	0	0	0	0.15	0	0	0.08	0	0	0.12	0.21	0.31	0.3	0.23	0.29	0.34	0	0	0.15	0.19	0.1	0	0	0	0
ERR467549_ST1	ST1		0.73	1	1	1	1	1	0.29	0.43	0	0.15	0.68	0.59	0.74	0.3	0.38	0	0	0.1	0	0.18	0	0	0	0	0	0.15	0	1	1	1	1	1	1	1	1	1	1	1	1	0.59	0.15	0.19	0.44	0	0	0	0
ERR467551_ST1	ST1		0.73	1	1	1	1	1	0.29	0.43	0	0.15	0.68	0.59	0.74	0.3	0.38	0	0	0.1	0	0.18	0	0	0	0	0	0.15	0	1	1	1	1	1	1	1	1	1	1	1	1	0.59	0.15	0.19	0.44	0	0	0	0
ERR467553_ST1	ST1		0.73	1	1	1	1	1	0.29	0.43	0	0.15	0.68	0.59	0.74	0.3	0.38	0	0	0.1	0	0.18	0	0	0	0	0	0.15	0	1	1	1	1	1	1	1	1	1	1	1	1	0.59	0.15	0.19	0.44	0	0	0	0
ERR467554_ST1	ST1		0.73	1	1	1	1	1	0.29	0.43	0	0.15	0.68	0.59	0.74	0.3	0.38	0	0	0.1	0	0.18	0	0	0	0	0	0.15	0	1	1	1	1	1	1	1	1	1	1	1	1	0.59	0.15	0.19	0.44	0	0	0	0
ERR467556_ST1	ST1		0.73	1	1	1	1	1	0.29	0.43	0	0.15	0.68	0.59	0.74	0.3	0.38	0	0	0.1	0	0.18	0	0	0	0	0	0.15	0	1	1	1	1	1	1	1	1	1	1	1	1	0.59	0.15	0.19	0.44	0	0	0	0
ERR467557_ST1	ST1		0.73	1	1	1	1	1	0.29	0.43	0	0.15	0.68	0.59	0.74	0.3	0.38	0	0	0.1	0	0.18	0	0	0	0	0	0.15	0	1	1	1	1	1	1	1	1	1	1	1	1	0.59	0.15	0.19	0.44	0	0	0	0
ERR467558_ST1	ST1		0.73	1	1	1	1	1	0.29	0.43	0	0.15	0.68	0.59	0.74	0.3	0.38	0	0	0.1	0	0.18	0	0	0	0	0	0.15	0	1	1	1	1	1	1	1	1	1	1	1	1	0.59	0.15	0.19	0.44	0	0	0	0
ERR467560_ST1	ST1		0.73	1	1	1	1	1	0.29	0.43	0	0.15	0.68	0.59	0.74	0.3	0.38	0	0	0.1	0	0.18	0	0	0	0	0	0.15	0	1	1	1	1	1	1	1	1	1	1	1	1	0.59	0.15	0.19	0.44	0	0	0	0
ERR467561_ST1	ST1		0.73	1	1	1	1	1	0.29	0.43	0	0.15	0.68	0.59	0.74	0.3	0.38	0	0	0.1	0	0.18	0	0	0	0	0	0.15	0	1	1	1	1	1	1	1	1	1	1	1	1	0.59	0.15	0.19	0.44	0	0	0	0
ERR467562_ST1	ST1		0.73	1	1	1	1	1	0.29	0.43	0	0.15	0.68	0.59	0.74	0.3	0.38	0	0	0.1	0	0	0	0	0	0	0	0.15	0	1	1	1	1	1	1	1	1	1	1	1	1	0.59	0.15	0.19	0.44	0	0	0	0
ERR467564_ST1	ST1		0.73	1	1	1	1	1	0.29	0.43	0	0.15	0.68	0.59	0.74	0.3	0.38	0	0	0.1	0	0.18	0	0	0	0	0	0.15	0	1	1	1	1	1	1	1	1	1	1	1	1	0.59	0.15	0.19	0.44	0	0	0	0
ERR467566_ST1	ST1		0.73	1	1	1	1	1	0.29	0.43	0	0.15	0.68	0.59	0.74	0.3	0.38	0	0	0.1	0	0.18	0	0	0	0	0	0.15	0	1	1	1	1	1	1	1	1	1	1	1	1	0.59	0.15	0.19	0.44	0	0	0	0
ERR467576_ST1	ST1		0.73	1	1	1	1	1	0.29	0.43	0	0.15	0.68	0.59	0.74	0.3	0.38	0	0	0.1	0	0.18	0	0	0	0	0	0.15	0	1	1	1	1	1	1	1	1	1	1	1	1	0.59	0.15	0.19	0.44	0	0	0	0
ERR467577_ST1	ST1		0.73	1	1	1	1	1	0.29	0.43	0	0.15	0.68	0.59	0.74	0.3	0.38	0	0	0.1	0	0.18	0	0	0	0	0	0.15	0	1	1	1	1	1	1	1	1	1	1	1	1	0.59	0.15	0.19	0.44	0	0	0	0
ERR467583_ST1	ST1		0.73	1	1	1	1	1	0.29	0.43	0	0.15	0.68	0.59	0.74	0.3	0.38	0	0	0.1	0	0.18	0	0	0	0	0	0.15	0	1	1	1	1	1	1	1	1	1	1	1	1	0.59	0.15	0.19	0.44	0	0	0	0
ERR467584_ST1	ST1		0.73	1	1	1	1	1	0.29	0.43	0	0.15	0.68	0.59	0.74	0.3	0.38	0	0	0.1	0	0.18	0	0	0	0	0	0.15	0	1	1	1	1	1	1	1	1	1	1	1	1	0.59	0.15	0.19	0.44	0	0	0	0
ERR467589_ST1	ST1		0.73	1	1	1	1	1	0.29	0.43	0	0.15	0.68	0.59	0.74	0.3	0.38	0	0	0.1	0	0	0	0	0	0	0	0.15	0	1	1	1	1	1	1	1	1	1	1	1	1	0.59	0.15	0.19	0.44	0	0	0	0
ERR467590_ST1	ST1		0.73	1	1	1	1	1	0.29	0.43	0	0.15	0.68	0.59	0.74	0.3	0.38	0	0	0.1	0	0.18	0	0	0	0	0	0.15	0	1	1	1	1	1	1	1	1	1	1	1	1	0.59	0.15	0.19	0.44	0	0	0	0
ERR467593_ST1	ST1		0.73	1	1	1	1	1	0.29	0.43	0	0.15	0.68	0.59	0.74	0.3	0.38	0	0	0.1	0	0.18	0	0	0	0	0	0.15	0	1	1	1	1	1	1	1	1	1	1	1	1	0.59	0.15	0.19	0.44	0	0	0	0
ERR502962_ST1	ST1		0.38	1	1	1	1	1	0.27	0.43	0	0.15	0.68	0.59	0.74	0.3	0.38	0	0	0.1	0	0	0	0	0	0	0	0.15	0	1	1	0.71	1	1	1	0.38	0.66	1	1	1	1	0.59	0.15	0.19	0.44	0	0	0	0
ERR537821_ST1	ST1		0.38	1	1	1	1	1	0.27	0.43	0	0.15	0.68	0.59	0.74	0.3	0.38	0	0	0.1	0	0	0	0	0	0	0	0.15	0	1	1	0.71	1	1	1	0.38	0.66	1	1	1	1	0.59	0.15	0.19	0.44	0	0	0	0
ERR658294_ST1	ST1		0.73	1	1	1	1	1	1	1	1	1	1	1	1	1	1	1	1	1	1	0.99	1	1	1	1	1	1	1	1	1	1	1	1	1	1	1	1	1	1	1	1	1	1	1	1	0.99	0.99	1
ERR658295_ST1	ST1		0.73	1	1	1	1	1	1	1	1	1	1	1	1	1	1	1	1	1	1	0.99	1	1	1	1	1	1	1	1	1	1	1	1	1	1	1	1	1	1	1	1	1	1	1	1	0.99	0.99	1
ERR658301_ST1	ST1		0.73	1	1	1	1	1	1	1	1	1	1	1	1	1	1	1	1	1	1	0.99	1	1	1	1	1	1	1	1	1	1	1	1	1	1	1	1	1	1	1	1	1	1	1	1	0.99	0.99	1
ERR658302_ST1	ST1		0.73	1	1	1	1	1	1	1	1	1	1	1	1	1	1	1	1	1	1	0.99	1	1	1	1	1	1	1	1	1	1	1	1	1	1	1	1	1	1	1	1	1	1	1	1	0.99	0.99	1
ERR658303_ST1	ST1		0.73	1	1	1	1	1	1	1	1	1	1	1	1	1	1	1	1	1	1	0.99	1	1	1	1	1	1	1	1	1	1	1	1	1	1	1	1	1	1	1	1	1	1	1	1	0.99	0.99	1
ERR658304_ST1	ST1		0.73	1	1	1	1	1	1	1	1	1	1	1	1	1	1	1	0.86	1	1	0.99	1	1	1	1	1	1	1	1	1	1	1	1	1	1	1	1	1	1	1	1	1	1	1	1	0.99	0.99	1
ERR658305_ST1	ST1		0.73	1	1	1	1	1	1	1	1	1	1	1	1	1	1	1	1	1	1	0.99	1	0.54	1	1	1	1	1	1	1	1	1	1	1	1	1	1	1	1	1	1	1	1	1	1	0.99	0.99	1
ERR658306_ST1	ST1		0.73	1	1	1	1	1	1	1	1	1	1	1	1	1	1	1	1	1	1	0.99	1	1	1	1	1	1	1	1	1	1	1	1	1	1	1	1	1	1	1	1	1	1	1	1	0.99	0.99	1
ERR658307_ST1	ST1		0.73	1	1	1	1	1	1	1	1	1	1	1	1	1	1	1	1	1	1	0.99	1	1	1	1	1	1	1	1	1	1	1	1	1	1	1	1	1	1	1	1	1	1	1	1	0.99	0.99	1
ERR658308_ST1	ST1		0.73	1	1	1	1	1	0.29	0.43	0	0.15	0.68	0.59	0.74	0.3	0.38	0	0	0.1	0	0	0	0	0	0	0	0.15	0	1	1	1	1	1	1	1	1	1	1	1	1	0.59	0.15	0.19	0.44	0	0	0	0
ERR658309_ST1	ST1		0.73	1	1	1	1	1	0.29	0.43	0	0.15	0.68	0.59	0.74	0.3	0.38	0	0	0.1	0	0	0	0	0	0	0	0.15	0	1	1	1	1	1	1	1	1	1	1	1	1	0.59	0.15	0.19	0.44	0	0	0	0
ERR658310_ST1	ST1		0.73	1	1	1	1	1	0.29	0.43	0	0.15	0.68	0.59	0.74	0.3	0.38	0	0	0.1	0	0	0	0	0	0	0	0.15	0	1	1	1	1	1	1	1	1	1	1	1	1	0.59	0.15	0.19	0.44	0	0	0	0
ERR658311_ST1	ST1		0.73	1	1	1	1	1	0.29	0.43	0	0.15	0.68	0.59	0.74	0.3	0.38	0	0	0.1	0	0	0	0	0	0	0	0.15	0	1	1	1	1	1	1	1	1	1	1	1	1	0.59	0.15	0.19	0.44	0	0	0	0
ERR658312_ST1	ST1		0.73	1	1	1	1	1	0.29	0.43	0	0.15	0.68	0.59	0.74	0.3	0.38	0	0	0.1	0	0	0	0	0	0	0	0.15	0	1	1	1	1	1	1	1	1	1	1	1	1	0.59	0.15	0.19	0.44	0	0	0	0
ERR658313_ST1	ST1		0.73	1	1	1	1	1	0.29	0.43	0	0.15	0.68	0.59	0.74	0.3	0.38	0	0	0.1	0	0	0	0	0	0	0	0.15	0	1	1	1	1	1	1	1	1	1	1	1	1	0.59	0.15	0.19	0.44	0	0	0	0
ERR658314_ST1	ST1		0.73	1	1	1	1	1	0.29	0.43	0	0.15	0.68	0.59	0.74	0.3	0.38	0	0	0.1	0	0	0	0	0	0	0	0.15	0	1	1	1	1	1	1	1	1	1	1	1	1	0.59	0.15	0.19	0.44	0	0	0	0
ERR928274_ST1	ST1		0.73	1	1	1	1	1	0.29	0.43	0	0.15	0.68	0.59	0.74	0.3	0.38	0	0	0.1	0	0	0	0	0	0	0	0.15	0	1	1	1	1	0.59	1	1	1	1	1	1	1	0.59	0.15	0.19	0.44	0	0	0	0
ERR928275_ST1	ST1		0.73	1	1	1	1	1	0.29	0.44	0	0.15	0.68	0.59	0.74	0.3	0.38	0	0	0.1	0	0	0	0	0	0	0	0.15	0	0.99	1	1	0.99	1	1	1	1	1	1	1	1	0.59	0.15	0.19	0.44	0	0	0	0
ERR928277_ST1	ST1		0.73	1	1	1	1	1	0.29	0.43	0	0.15	0.68	0.59	0.74	0.3	0.38	0	0	0.1	0	0	0	0	0	0	0	0.15	0	1	1	1	1	1	1	1	1	1	1	1	1	0.59	0.15	0.19	0.44	0	0	0	0
ERR928278_ST1	ST1		0.73	1	1	1	1	1	0.29	0.43	0	0.15	0.68	0.59	0.74	0.3	0.38	0	0	0.1	0	0	0	0	0	0	0	0.15	0	1	1	1	1	1	1	1	1	1	1	1	1	0.59	0.15	0.19	0.44	0	0	0	0
ERR928279_ST1	ST1		0.73	1	1	1	1	1	0.29	0.43	0	0.15	0.68	0.59	0.74	0.3	0.38	0	0	0.1	0	0	0	0	0	0	0	0.15	0	1	1	1	1	1	1	1	1	1	1	1	1	0.59	0.15	0.19	0.44	0	0	0	0
ERR928280_ST1	ST1		0.73	1	1	1	1	1	0.29	0.43	0	0.15	0.68	0.59	0.74	0.3	0.38	0	0	0.1	0	0	0	0	0	0	0	0.15	0	1	1	1	1	1	1	1	1	1	1	1	1	0.59	0.15	0.19	0.44	0	0	0	0
ERR928281_ST1	ST1		0.73	1	1	1	1	1	0.29	0.43	0	0.15	0.68	0.59	0.74	0.3	0.38	0	0	0.1	0	0	0	0	0	0	0	0.15	0	1	1	1	1	1	1	1	1	1	1	1	1	0.59	0.15	0.19	0.44	0	0	0	0
ERR928282_ST1	ST1		0.73	1	1	1	1	1	0.29	0.43	0	0.15	0.68	0.59	0.74	0.3	0.38	0	0	0.1	0	0	0	0	0	0	0	0.15	0	1	1	1	1	1	1	1	1	1	1	1	1	0.59	0.15	0.19	0.44	0	0	0	0
ERR928283_ST1	ST1		0.73	1	1	1	1	1	0.29	0.43	0	0.15	0.68	0.59	0.74	0.3	0.38	0	0	0.1	0	0	0	0	0	0	0	0.15	0	1	1	1	1	1	1	1	1	1	1	1	1	0.59	0.15	0.19	0.44	0	0	0	0
ERR928284_ST1	ST1		0.73	1	1	1	1	1	0.29	0.43	0	0.15	0.68	0.59	0.74	0.3	0.38	0	0	0.1	0	0	0	0	0	0	0	0.15	0	1	1	1	1	1	1	1	1	1	1	1	1	0.59	0.15	0.19	0.44	0	0	0	0
ERR928285_ST1	ST1		0.73	1	1	1	1	1	0.29	0.43	0	0.15	0.68	0.59	0.74	0.3	0.38	0	0	0.1	0	0	0	0	0	0	0	0.15	0	1	1	1	1	1	1	1	1	1	1	1	1	0.59	0.15	0.19	0.44	0	0	0	0
ERR928287_ST1	ST1		0.73	1	1	1	1	1	0.29	0.43	0	0.15	0.68	0.59	0.74	0.3	0.38	0	0	0.1	0	0	0	0	0	0	0	0.15	0	1	1	1	1	1	1	1	1	1	1	1	1	0.59	0.15	0.19	0.44	0	0	0	0
ERR928288_ST1	ST1		0.73	1	1	1	1	1	0.27	0	0	0.25	0.68	0.59	0.74	0.3	0.38	0	0	0.1	0	0	0	0	0	0	0	0.15	0	0	0.08	0	0	0.12	0.21	0.31	0.3	0.32	0.29	0.47	1	0	0.15	0.19	0.1	0	0	0	0
ERR928289_ST1	ST1		0.73	1	1	1	1	1	0.29	0.43	0	0.15	0.68	0.59	0.74	0.3	0.38	0	0	0.1	0	0	0	0	0	0	0	0.15	0	1	1	1	1	1	1	1	1	1	1	1	1	0.59	0.15	0.19	0.44	0	0	0	0
ERR928290_ST1	ST1		0.73	1	1	1	1	1	0.29	0.43	0	0.15	0.68	0.59	0.74	0.3	0.38	0	0	0.1	0	0	0	0	0	0	0	0.15	0	1	1	1	1	0.68	1	1	1	1	1	1	1	0.59	0.15	0.19	0.44	0	0	0	0
ERR928295_ST1	ST1		0.73	1	1	1	1	1	0.29	0.44	0	0.15	0.68	0.59	0.74	0.3	0.38	0	0	0.1	0	0	0	0	0	0	0	0.15	0	0.99	1	1	1	1	1	1	1	1	1	1	1	0.59	0.15	0.19	0.44	0	0	0	0
ERR928296_ST1	ST1		0.73	1	1	1	1	1	0.29	0.43	0	0.15	0.68	0.59	0.74	0.3	0.38	0	0	0.1	0	0	0	0	0	0	0	0.15	0	1	1	1	1	1	1	1	1	1	1	1	1	0.59	0.15	0.19	0.44	0	0	0	0
ERR928297_ST1	ST1		0.73	1	1	1	1	1	0.29	0.43	0	0.15	0.68	0.59	0.74	0.3	0.38	0	0	0.1	0	0	0	0	0	0	0	0.15	0	1	1	1	1	0.65	1	1	1	1	1	1	1	0.59	0.15	0.19	0.44	0	0	0	0
ERR928298_ST1	ST1		0.73	1	1	1	1	1	0.29	0.43	0	0.15	0.68	0.59	0.74	0.3	0.38	0	0	0.1	0	0	0	0	0	0	0	0.15	0	1	1	1	1	1	1	1	1	1	1	1	1	0.59	0.15	0.19	0.44	0	0	0	0
ERR928299_ST1	ST1		0.73	1	1	1	1	1	0.29	0.43	0	0.15	0.68	0.59	0.74	0.3	0.38	0	0	0.1	0	0	0	0	0	0	0	0.15	0	1	1	1	1	1	1	1	1	1	1	1	1	0.59	0.15	0.19	0.44	0	0	0	0
ERR928300_ST1	ST1		0.73	1	1	1	1	1	0.29	0.43	0	0.15	0.68	0.59	0.74	0.3	0.38	0	0	0.1	0	0	0	0	0	0	0	0.15	0	1	1	1	1	1	1	1	1	1	1	1	1	0.59	0.15	0.19	0.44	0	0	0	0
ERR928301_ST1	ST1		0.73	1	1	1	1	1	0.29	0.43	0	0.15	0.68	0.59	0.74	0.3	0.38	0	0	0.1	0	0	0	0	0	0	0	0.15	0	1	1	1	1	1	1	1	1	1	1	1	1	0.59	0.15	0.19	0.44	0	0	0	0
ERR928302_ST1	ST1		0.73	1	1	1	1	1	0.29	0.43	0	0.15	0.68	0.59	0.74	0.3	0.38	0	0	0.1	0	0	0	0	0	0	0	0.15	0	1	1	1	1	1	1	1	1	1	1	1	1	0.59	0.15	0.19	0.44	0	0	0	0
ERR928303_ST1	ST1		0.73	1	1	1	1	1	0.29	0.43	0	0.15	0.68	0.59	0.74	0.3	0.38	0	0	0.1	0	0	0	0	0	0	0	0.15	0	1	1	1	1	1	1	1	1	1	1	1	1	0.59	0.15	0.19	0.44	0	0	0	0
ERR928304_ST1	ST1		0.73	1	1	1	1	1	0.27	0	0	0.25	0.68	0.59	0.74	0.3	0.38	0	0	0.1	0	0	0	0	0	0	0	0.15	0	0	0.08	0	0	0.12	0.21	0.31	0.3	0.32	0.29	0.34	1	0	0.15	0.19	0.1	0	0	0	0
ERR928305_ST1	ST1		0.73	1	1	1	1	1	0.29	0.43	0	0.15	0.68	0.59	0.74	0.3	0.38	0	0	0.1	0	0	0	0	0	0	0	0.15	0	1	1	1	1	1	1	1	1	1	1	1	1	0.59	0.15	0.19	0.44	0	0	0	0
ERR928306_ST1	ST1		0.73	1	1	1	1	1	0.29	0.43	0	0.15	0.68	0.59	0.74	0.3	0.38	0	0	0.1	0	0	0	0	0	0	0	0.15	0	1	1	1	1	1	1	1	1	1	1	1	1	0.59	0.15	0.19	0.44	0	0	0	0
ERR928307_ST1	ST1		0.73	1	1	1	1	1	0.27	0	0	0.25	0.68	0.59	0.74	0.3	0.38	0	0	0.1	0	0	0	0	0	0	0	0.15	0	0	0.08	0	0	0.12	0.21	0.31	0.3	0.32	0.29	0.34	1	0	0.15	0.19	0.1	0	0	0	0
ERR928308_ST1	ST1		0.73	1	1	1	1	1	0.23	0	0	0.25	0.68	0.59	0.74	0.3	0.38	0	0	0.1	0	0	0	0	0	0.41	0	0.15	0	0	0.37	0	0	0.12	0.21	0.27	0.26	0.32	0.29	0.34	1	0	0.15	0.19	0.43	0.2	0	0	0
ERR928309_ST1	ST1		0.73	1	1	1	1	1	0.27	0	0	0.25	0.68	0.59	0.74	0.3	0.38	0	0	0.1	0	0	0	0	0	0	0	0.15	0	0	0.08	0	0	0.12	0.21	0.31	0.3	0.44	0.29	0.34	1	0	0.15	0.19	0.1	0	0	0	0
ERR928310_ST1	ST1		0.73	1	1	1	1	1	0.29	0.43	0	0.25	0.68	0.59	0.74	0.3	0.38	0	0	0.1	0	0	0	0	0	0	0	0.15	0	1	1	1	1	1	1	1	1	1	1	1	1	0.59	0.15	0.19	0.44	0	0	0	0
ERR928311_ST1	ST1		0.73	1	1	1	1	1	0.29	0.43	0	0.25	0.68	0.59	0.74	0.3	0.38	0	0	0.1	0	0	0	0	0	0	0	0.15	0	1	1	1	1	1	1	1	1	1	1	1	1	0.59	0.15	0.19	0.44	0	0	0	0
ERR928312_ST1	ST1		0.73	1	1	1	1	1	0.29	0.43	0	0.25	0.68	0.59	0.74	0.3	0.38	0	0	0.1	0	0	0	0	0	0	0	0.15	0	1	1	1	1	1	1	1	1	1	1	1	1	0.59	0.15	0.19	0.44	0	0	0	0
ERR955906_ST1	ST1		0.73	1	1	1	1	1	0.29	0.43	0	0.15	0.68	0.59	0.74	0.3	0.38	0	0	0.1	0	0	0	0	0	0	0	0.15	0	1	1	1	1	1	1	1	1	1	1	1	1	0.59	0.15	0.19	0.44	0	0	0	0
GCA_000085225.1_Clostridioides_difficile_CD196_Complete_Genome_ST1	ST1		0.7	1	1	1	1	0.35	0.27	0	0	0.15	0.68	0.59	0.74	0.3	0.38	0	0	0.1	0	0	0	0	0	0	0	0.15	0	0	0.08	0	0	0.12	0.21	0.31	0.3	0.23	0.29	0.34	0	0	0.15	0.19	0.1	0	0	0	0
GCA_000210455.1_Clostridioides_difficile_2007855_Complete_Genome_ST1	ST1		0.73	1	1	1	1	1	0.64	0	0	0.25	0.68	0.59	0.74	0.3	0.38	0	0	0.1	0	0	0	0	0	0	0	0.15	0	0	0.08	0	0.52	0.44	0.55	0.31	0.31	0.32	0.29	0.34	1	0	0.15	0.19	0.1	0	0	0	0
GCA_000211235.1_Clostridioides_difficile_BI1_Complete_Genome_ST1	ST1		0.73	1	1	1	1	1	0.27	0	0	0.15	0.68	0.59	0.74	0.3	0.38	0	0	0.1	0	0	0	0	0	0	0	0.15	0	0	0.08	0	0	0.12	0.21	0.31	0.3	0.23	0.29	0.34	0	0	0.15	0.19	0.1	0	0	0	0
GCA_000451065.2_Clostridioides_difficile_P23_Contig_ST1	ST1		0.73	1	1	1	1	1	0.27	0	0	0.15	0.68	0.59	0.74	0.3	0.38	0	0	0.1	0	0	0	0	0	0	0	0.15	0	0	0.08	0	0	0.12	0.21	0.31	0.3	0.23	0.29	0.34	0	0	0.15	0.19	0.1	0	0	0	0
GCA_000451785.2_Clostridioides_difficile_P31_Contig_ST1	ST1		0.73	1	1	1	1	1	0.29	0.43	0	0.15	0.68	0.59	0.74	0.3	0.38	0	0	0.1	0	0	0	0	0	0	0	0.15	0	1	1	1	1	1	1	1	1	1	1	1	1	0.59	0.15	0.19	0.44	0	0	0	0
GCA_000451885.2_Clostridioides_difficile_P45_Contig_ST1	ST1		0.73	1	1	1	1	1	0.29	0.43	0	0.15	0.68	0.59	0.74	0.3	0.38	0	0	0.1	0	0	0	0	0	0	0	0.15	0	1	1	1	1	1	1	1	1	1	1	1	1	0.59	0.15	0.19	0.44	0	0	0	0
GCA_000826625.2_Clostridioides_difficile_G46_Contig_ST1	ST1		0.73	1	1	1	1	1	0.29	0.43	0	0.15	0.68	0.59	0.74	0.3	0.38	0	0	0.1	0	0	0.33	0	0	0	0	0.15	0	1	1	1	1	1	1	1	1	1	1	1	1	1	1	1	1	1	0.99	0.99	1
GCA_001484885.1_Clostridioides_difficile_CD26A54_R_Contig_ST1	ST1		0.73	1	1	1	1	1	0.29	0.43	0	0.15	0.68	0.59	0.74	0.3	0.38	0	0	0.1	0	0	0	0	0	0	0	0.15	0	1	1	1	1	1	1	1	1	1	1	1	1	0.59	0.15	0.19	0.44	0	0	0	0
GCA_001484895.1_Clostridioides_difficile_CD26A54_S_Contig_ST1	ST1		0.73	1	1	1	1	1	0.29	0.43	0	0.15	0.68	0.59	0.74	0.3	0.38	0	0	0.1	0	0	0	0	0	0	0	0.15	0	1	1	1	1	1	1	1	1	1	1	1	1	0.59	0.15	0.19	0.44	0	0	0	0
GCA_001971835.1_Clostridioides_difficile_20100211_Contig_ST1	ST1		0.73	1	1	1	1	1	0.29	0.43	0	0.15	0.68	0.59	0.74	0.3	0.38	0	0	0.1	0	0	0	0	0	0	0	0.15	0	1	1	1	1	1	1	1	1	1	1	1	1	0.59	0.15	0.19	0.44	0	0	0	0
GCA_001972015.1_Clostridioides_difficile_20110270_Contig_ST1	ST1		0.73	1	1	1	1	1	0.29	0.43	0	0.15	0.68	0.59	0.74	0.3	0.38	0	0	0.1	0	0	0	0	0	0	0	0.15	0	1	1	1	1	1	1	1	1	1	1	1	1	0.59	0.15	0.19	0.44	0	0	0	0
GCA_002301945.1_Clostridioides_difficile_6635-BI-ST1_Contig_ST1	ST1		0.73	1	1	1	1	1	0.29	0.43	0	0.15	0.68	0.59	0.74	0.3	0.38	0	0	0.1	0	0.17	0	0	0	0	0	0.15	0	1	1	1	1	1	1	1	1	1	1	1	1	0.59	0.15	0.19	0.44	0	0	0	0.04
GCA_002302765.1_Clostridioides_difficile_7471-BI-ST1_Contig_ST1	ST1		0.73	1	1	1	1	1	0.29	0.43	0	0.15	0.68	0.59	0.74	0.3	0.38	0	0	0.1	0	0	0	0	0	0	0	0.15	0	1	1	1	1	1	1	1	1	1	1	1	1	0.59	0.15	0.19	0.44	0	0.14	0	0
GCA_002303165.1_Clostridioides_difficile_7501-BI-ST1_Contig_ST1	ST1		0.73	1	1	1	1	1	0.29	0.43	0	0.15	0.68	0.59	0.74	0.3	0.38	0	0	0.1	0	0.15	0	0	0	0	0	0.15	0	1	1	1	1	1	1	1	1	1	1	1	1	0.59	0.15	0.19	0.44	0	0	0	0
GCA_002335485.1_Clostridioides_difficile_NCKUH-21_Contig_ST1	ST1		0.73	1	1	1	1	1	0.27	0	0	0.15	0.68	0.59	0.74	0.3	0.38	0	0	0.1	0	0.18	0	0	0	0	0	0.15	0	0	0.08	0	0	0.12	0.21	0.31	0.3	0.23	0.29	0.34	0	0	0.15	0.19	0.1	0	0	0	0
GCA_900007545.1_Clostridioides_difficile_VL_0002_Contig_ST1	ST1		0.73	1	1	1	1	1	0.29	0.43	0	0.15	0.68	0.59	0.74	0.3	0.38	0	0	0.1	0	0	0	0	0	0	0	0.15	0	1	1	1	1	1	1	1	1	1	1	1	1	0.59	0.15	0.19	0.44	0	0	0	0
GCA_900007575.1_Clostridioides_difficile_VL_0012_Contig_ST1	ST1		0.73	1	0.84	1	1	1	0.29	0.43	0	0.15	0.68	0.59	0.74	0.3	0.38	0	0	0.1	0	0	0	0	0	0	0	0.15	0	1	1	1	1	1	1	1	1	1	1	1	1	0.59	0.15	0.19	0.44	0	0	0	0
GCA_900007625.1_Clostridioides_difficile_VL_0204_Contig_ST1	ST1		0.73	1	1	1	1	1	0.29	0.43	0	0.15	0.68	0.59	0.74	0.3	0.38	0	0	0.1	0	0	0	0	0	0	0	0.15	0	1	1	1	1	1	1	1	1	1	1	1	1	0.59	0.15	0.19	0.44	0	0	0	0
GCA_900008285.1_Clostridioides_difficile_VL_0017_Contig_ST1	ST1		0.73	1	1	1	1	1	0.29	0.43	0	0.15	0.68	0.59	0.74	0.3	0.38	0	0	0.1	0	0	0	0	0	0	0	0.15	0	1	1	1	1	1	1	1	1	1	1	1	1	0.59	0.15	0.19	0.44	0	0	0	0
GCA_900008375.1_Clostridioides_difficile_VL_0074_Contig_ST1	ST1		0.73	1	1	1	1	1	0.29	0.43	0	0.15	0.68	0.59	0.74	0.3	0.38	0	0	0.1	0	0	0	0	0	0	0	0.15	0	1	1	1	1	1	1	1	1	1	1	1	1	0.59	0.15	0.19	0.44	0	0	0	0
GCA_900008395.1_Clostridioides_difficile_VL_0094_Contig_ST1	ST1		0.73	1	1	1	1	1	0.29	0.43	0	0.15	0.68	0.59	0.74	0.3	0.38	0	0	0.1	0	0	0	0	0	0	0	0.15	0	1	1	1	1	1	1	1	1	1	1	1	1	0.59	0.15	0.19	0.44	0	0	0	0
GCA_900008425.1_Clostridioides_difficile_VL_0109_Contig_ST1	ST1		0.73	1	0.84	1	1	1	0.29	0.43	0	0.15	0.68	0.59	0.74	0.3	0.38	0	0	0.1	0	0	0	0	0	0	0	0.15	0	1	1	1	1	1	1	1	1	1	1	1	1	0.59	0.15	0.19	0.44	0	0	0	0
GCA_900008445.1_Clostridioides_difficile_VL_0128_Contig_ST1	ST1		0.73	1	1	1	1	1	0.29	0.43	0	0.15	0.68	0.59	0.74	0.3	0.38	0	0	0.1	0	0	0	0	0	0	0	0.15	0	1	0.69	0.48	0.53	0.32	0.38	0.31	1	0.37	1	1	1	0.59	0.15	0.19	0.38	0	0	0	0
GCA_900008515.1_Clostridioides_difficile_VL_0301_Contig_ST1	ST1		0.73	1	1	1	1	1	0.29	0.43	0	0.15	0.68	0.59	0.74	0.3	0.38	0	0	0.1	0	0	0	0	0	0	0	0.15	0	1	1	1	1	1	1	1	1	1	1	1	1	0.59	0.15	0.19	0.44	0	0	0	0
GCA_900008655.1_Clostridioides_difficile_VL_0435_Contig_ST1	ST1		0.73	1	1	1	1	1	0.29	0.43	0	0.15	0.68	0.59	0.74	0.3	0.38	0	0	0.1	0	0	0	0	0	0	0	0.15	0	1	1	1	1	1	1	1	1	1	1	1	1	0.59	0.15	0.19	0.44	0	0	0	0
GCA_900008755.1_Clostridioides_difficile_VL_0321_Contig_ST1	ST1		0.73	1	0.84	1	1	1	0.29	0.43	0	0.15	0.68	0.59	0.74	0.3	0.38	0	0	0.1	0	0	0	0	0	0	0	0.15	0	1	1	1	1	1	1	1	1	1	1	1	1	0.59	0.15	0.19	0.44	0	0	0	0
GCA_900008765.1_Clostridioides_difficile_VL_0319_Contig_ST1	ST1		0.73	1	1	1	1	1	0.29	0.43	0	0.15	0.68	0.59	0.74	0.3	0.38	0	0	0.1	0	0	0	0	0	0	0	0.15	0	1	1	1	1	1	1	1	1	1	1	1	1	0.59	0.15	0.19	0.44	0	0	0	0
GCA_900008795.1_Clostridioides_difficile_VL_0398_Contig_ST1	ST1		0.73	1	0.84	1	1	1	0.29	0.43	0	0.15	0.68	0.59	0.74	0.3	0.38	0	0	0.1	0	0	0	0	0	0	0	0.15	0	1	1	1	1	1	1	1	1	1	1	1	1	0.59	0.15	0.19	0.44	0	0	0	0
GCA_900009255.1_Clostridioides_difficile_VL_0448_Contig_ST1	ST1		0.73	1	1	1	1	1	0.29	0.43	0	0.15	0.68	0.59	0.74	0.3	0.38	0	0	0.1	0	0	0	0	0	0	0	0.15	0	1	1	1	1	1	1	1	1	1	1	1	1	0.59	0.15	0.19	0.44	0	0	0	0
GCA_900009445.1_Clostridioides_difficile_VL_0349_Contig_ST1	ST1		0.73	1	0.84	1	1	1	0.29	0.43	0	0.15	0.68	0.59	0.74	0.3	0.38	0	0	0.1	0	0	0	0	0	0	0	0.15	0	1	1	1	1	1	1	1	1	1	1	1	1	0.59	0.15	0.19	0.44	0	0	0	0
GCA_900009465.1_Clostridioides_difficile_VL_0388_Contig_ST1	ST1		0.73	1	1	1	1	1	0.29	0.43	0	0.15	0.68	0.59	0.74	0.3	0.38	0	0	0.1	0	0	0	0	0	0	0	0.15	0	1	1	1	1	1	1	1	1	1	1	1	1	0.59	0.15	0.19	0.44	0	0	0	0
GCA_900009475.1_Clostridioides_difficile_VL_0438_Contig_ST1	ST1		0.73	1	1	1	1	1	0.29	0.43	0	0.15	0.68	0.59	0.74	0.3	0.38	0	0	0.1	0	0	0	0	0	0	0	0.15	0	1	1	1	1	1	1	1	1	1	1	1	1	0.59	0.15	0.19	0.44	0	0	0	0
GCA_900009715.1_Clostridioides_difficile_VL_0132_Contig_ST1	ST1		0.73	1	1	1	1	1	0.29	0.43	0	0.15	0.68	0.59	0.74	0.3	0.38	0	0	0.1	0	0	0	0	0	0	0	0.15	0	1	1	1	1	1	1	1	1	1	1	1	1	0.59	0.15	0.19	0.44	0	0	0	0
GCA_900010335.1_Clostridioides_difficile_VL_0127_Contig_ST1	ST1		0.73	1	1	1	1	0.98	0.27	0	0	0.15	0.68	0.59	0.74	0.3	0.38	0	0	0.1	0	0.18	0	0	0	0	0	0.15	0	0	0.08	0	0	0.12	0.21	0.31	0.3	0.23	0.29	0.34	0	0	0.15	0.19	0.1	0	0	0	0
GCA_900010355.1_Clostridioides_difficile_VL_0146_Contig_ST1	ST1		0.73	1	1	1	1	1	0.29	0.43	0	0.15	0.68	0.59	0.74	0.3	0.38	0	0	0.1	0	0	0	0	0	0	0	0.15	0	1	1	1	1	1	1	1	1	1	1	1	1	0.59	0.15	0.19	0.44	0	0	0	0
GCA_900010385.1_Clostridioides_difficile_VL_0412_Contig_ST1	ST1		0.73	1	1	1	1	1	0.29	0.43	0	0.15	0.68	0.59	0.74	0.3	0.38	0	0	0.1	0	0	0	0	0	0	0	0.15	0	1	1	1	1	1	1	1	1	1	1	1	1	0.59	0.15	0.19	0.44	0	0	0	0
GCA_900010425.1_Clostridioides_difficile_VL_0468_Contig_ST1	ST1		0.73	1	1	1	1	1	0.27	0	0	0.15	0.68	0.59	0.74	0.3	0.38	0	0	0.1	0	0	0	0	0	0	0	0.15	0	0	0.08	0	0	0.12	0.21	0.31	0.3	0.35	0.29	0.34	0	0	0.15	0.19	0.1	0	0	0	0
GCA_900010505.1_Clostridioides_difficile_VL_0390_Contig_ST1	ST1		0.73	1	1	1	1	1	0.29	0.43	0	0.15	0.68	0.59	0.74	0.3	0.38	0	0	0.1	0	0	0	0	0	0	0	0.15	0	1	1	1	1	1	1	1	1	1	1	1	1	0.59	0.15	0.19	0.44	0	0	0	0
GCA_900010875.1_Clostridioides_difficile_VL_0022_Contig_ST1	ST1		0.73	1	1	1	1	1	0.29	0.43	0	0.15	0.68	0.59	0.74	0.3	0.38	0	0	0.1	0	0	0	0	0	0	0	0.15	0	1	1	0.59	1	1	1	0.7	1	1	1	1	1	0.59	0.15	0.19	0.44	0	0	0	0
GCA_900010885.1_Clostridioides_difficile_VL_0011_Contig_ST1	ST1		0.73	1	1	1	0.96	1	0.29	0.43	0	0.15	0.68	0.59	0.74	0.3	0.38	0	0	0.1	0	0	0	0	0	0	0	0.15	0	1	1	1	1	1	1	1	1	1	1	1	1	0.59	0.15	0.19	0.44	0	0	0	0
GCA_900011105.1_Clostridioides_difficile_VL_0177_Contig_ST1	ST1		0.73	1	1	1	1	1	0.29	0.43	0	0.15	0.68	0.59	0.74	0.3	0.38	0	0	0.1	0	0	0	0	0	0	0	0.15	0	1	1	1	1	1	1	1	1	1	1	1	1	0.59	0.15	0.19	0.44	0	0	0	0
GCA_900011165.1_Clostridioides_difficile_VL_0420_Contig_ST1	ST1		0.73	1	1	1	1	1	0.29	0.43	0	0.15	0.68	0.59	0.74	0.3	0.38	0	0	0.1	0	0	0	0	0	0	0	0.15	0	1	1	1	1	1	1	1	1	1	1	1	1	0.59	0.15	0.19	0.44	0	0	0	0
GCA_900011385.1_Clostridioides_difficile_VL_0050_Contig_ST1	ST1		0.73	1	1	1	1	1	0.29	0.43	0	0.15	0.68	0.59	0.74	0.3	0.24	0	0	0.1	0	0	0	0	0	0	0	0.15	0	1	1	1	1	1	1	1	1	1	1	1	1	0.59	0.15	0.19	0.44	0	0	0	0
GCA_900011675.1_Clostridioides_difficile_VL_0193_Contig_ST1	ST1		0.73	1	1	1	1	1	0.29	0.43	0	0.15	0.68	0.59	0.74	0.3	0.38	0	0	0.1	0	0	0	0	0	0	0	0.15	0	1	1	1	1	1	1	1	1	1	1	1	1	0.59	0.15	0.19	0.44	0	0	0	0
GCA_900011905.1_Clostridioides_difficile_VL_0081_Contig_ST1	ST1		0.73	1	1	1	1	1	0.29	0.43	0	0.15	0.68	0.59	0.74	0.3	0.38	0	0	0.1	0	0	0	0	0	0	0	0.15	0	1	1	1	1	1	1	1	1	1	1	1	1	0.59	0.15	0.19	0.44	0	0	0	0
GCA_900011915.1_Clostridioides_difficile_VL_0082_Contig_ST1	ST1		0.73	1	1	1	1	1	0.29	0.43	0	0.15	0.68	0.59	0.74	0.3	0.38	0	0	0.1	0	0	0	0	0	0	0	0.15	0	1	1	1	1	1	1	1	1	1	1	1	1	0.59	0.15	0.19	0.44	0	0	0	0
GCA_900011955.1_Clostridioides_difficile_VL_0090_Contig_ST1	ST1		0.73	1	1	1	1	1	0.29	0.43	0	0.15	0.68	0.59	0.74	0.3	0.38	0	0	0.1	0	0	0	0	0	0	0	0.15	0	1	1	1	1	1	1	1	1	1	1	1	1	0.59	0.15	0.19	0.44	0	0	0	0
GCA_900011965.1_Clostridioides_difficile_VL_0092_Contig_ST1	ST1		0.73	1	1	1	1	1	0.29	0.43	0	0.15	0.68	0.59	0.74	0.3	0.38	0	0	0.1	0	0	0	0	0	0	0	0.15	0	1	1	1	1	1	1	1	1	1	1	1	1	0.59	0.15	0.19	0.44	0	0	0	0
GCA_900012035.1_Clostridioides_difficile_VL_0108_Contig_ST1	ST1		0.73	1	1	1	1	0.58	0.27	0	0	0.15	0.68	0.59	0.74	0.3	0.38	0	0	0.1	0	0	0	0	0	0	0	0.15	0	0	0.08	0	0	0.12	0.21	0.31	0.3	0.23	0.29	0.34	0	0	0.15	0.19	0.1	0	0	0	0
GCA_900012055.1_Clostridioides_difficile_VL_0114_Contig_ST1	ST1		0.73	1	1	1	1	1	0.29	0.43	0	0.15	0.68	0.59	0.74	0.3	0.38	0	0	0.1	0	0	0	0	0	0	0	0.15	0	1	1	1	1	1	1	1	1	1	1	1	1	0.59	0.15	0.19	0.44	0	0	0	0
GCA_900012105.1_Clostridioides_difficile_VL_0119_Contig_ST1	ST1		0.73	1	1	1	1	1	0.29	0.43	0	0.15	0.68	0.59	0.74	0.3	0.38	0	0	0.1	0	0	0	0	0	0	0	0.15	0	1	1	1	1	1	1	1	1	1	1	1	1	0.59	0.15	0.19	0.44	0	0	0	0
GCA_900012115.1_Clostridioides_difficile_VL_0120_Contig_ST1	ST1		0.73	1	1	1	1	1	0.29	0.43	0	0.15	0.68	0.48	0.74	0.3	0.38	0	0	0.1	0	0	0	0	0	0	0	0.15	0	1	1	1	1	1	1	1	1	1	1	1	1	0.59	0.15	0.19	0.44	0	0	0	0
GCA_900012165.1_Clostridioides_difficile_VL_0142_Contig_ST1	ST1		0.73	1	1	1	1	1	0.27	0.26	0	0.15	0.68	0.59	0.74	0.3	0.38	0	0	0.1	0	0	0	0	0	0	0	0.15	0	0.65	0.46	0.15	0.08	0.12	0.21	0.31	0.37	0.72	1	1	1	0.4	0.15	0.19	0.21	0	0	0	0
GCA_900012305.1_Clostridioides_difficile_VL_0174_Contig_ST1	ST1		0.73	1	1	1	1	1	0.29	0.43	0	0.15	0.68	0.59	0.74	0.3	0.38	0	0	0.1	0	0	0	0	0	0	0	0.15	0	1	1	1	1	1	1	1	1	1	1	1	1	0.59	0.15	0.19	0.44	0	0	0	0
GCA_900012455.1_Clostridioides_difficile_VL_0066_Contig_ST1	ST1		0.73	1	1	1	1	1	0.29	0.43	0	0.15	0.68	0.48	0.74	0.3	0.38	0	0	0.1	0	0	0	0	0	0	0	0.15	0	1	1	0.54	1	1	0.91	1	1	1	1	1	1	0.59	0.15	0.19	0.44	0	0	0	0
GCA_900012465.1_Clostridioides_difficile_VL_0162_Contig_ST1	ST1		0.73	1	0.84	1	1	1	0.29	0.43	0	0.15	0.68	0.59	0.74	0.3	0.38	0	0	0.1	0	0	0	0	0	0	0	0.15	0	1	1	1	1	1	1	1	1	1	1	1	1	0.59	0.15	0.19	0.44	0	0	0	0
GCA_900012475.1_Clostridioides_difficile_VL_0222_Contig_ST1	ST1		0.73	1	1	1	1	1	0.29	0.43	0	0.15	0.68	0.59	0.74	0.3	0.38	0	0	0.1	0	0	0	0	0	0	0	0.15	0	1	1	1	1	1	1	1	1	1	1	1	1	0.59	0.15	0.19	0.44	0	0	0	0
GCA_900012835.1_Clostridioides_difficile_VL_0196_Contig_ST1	ST1		0.73	1	0.84	1	1	1	0.29	0.43	0	0.15	0.68	0.59	0.74	0.3	0.38	0	0	0.1	0	0	0	0	0	0	0	0.15	0	1	1	1	1	1	0.92	0.69	1	1	1	1	1	0.59	0.15	0.19	0.44	0	0	0	0
GCA_900012865.1_Clostridioides_difficile_VL_0199_Contig_ST1	ST1		0.73	1	1	1	1	1	0.29	0.43	0	0.15	0.68	0.59	0.74	0.3	0.38	0	0	0.1	0	0	0	0	0	0	0	0.15	0	1	1	1	1	1	1	1	1	1	1	1	1	0.59	0.15	0.19	0.44	0	0	0	0
GCA_900012885.1_Clostridioides_difficile_VL_0201_Contig_ST1	ST1		0.73	1	1	1	1	1	0.29	0.43	0	0.15	0.68	0.59	0.74	0.3	0.38	0	0	0.1	0	0	0	0	0	0	0	0.15	0	1	1	1	1	1	1	1	1	1	1	1	1	0.59	0.15	0.19	0.44	0	0	0	0
GCA_900012945.1_Clostridioides_difficile_VL_0211_Contig_ST1	ST1		0.73	1	1	1	1	1	0.29	0.43	0	0.15	0.68	0.59	0.74	0.3	0.38	0	0	0.1	0	0	0	0	0	0	0	0.15	0	1	1	1	1	1	1	1	1	1	1	1	1	0.59	0.15	0.19	0.44	0	0	0	0
GCA_900013005.1_Clostridioides_difficile_VL_0217_Contig_ST1	ST1		0.73	1	1	1	1	1	0.29	0.43	0	0.15	0.68	0.59	0.74	0.3	0.38	0	0	0.1	0	0	0	0	0	0	0	0.15	0	1	1	1	1	1	0.92	1	1	1	1	1	1	0.59	0.15	0.19	0.44	0	0	0	0
GCA_900013095.1_Clostridioides_difficile_VL_0229_Contig_ST1	ST1		0.73	1	1	1	1	1	0.29	0.43	0	0.15	0.68	0.59	0.74	0.3	0.38	0	0	0.1	0	0	0	0	0	0	0	0.15	0	1	1	1	1	1	1	1	1	1	1	1	1	0.59	0.15	0.19	0.44	0	0	0	0
GCA_900013255.1_Clostridioides_difficile_VL_0396_Contig_ST1	ST1		0.73	1	1	1	1	1	0.29	0.43	0	0.15	0.68	0.59	0.74	0.3	0.38	0	0	0.1	0	0	0	0	0	0	0	0.15	0	1	1	1	1	1	1	1	1	1	1	1	1	0.59	0.15	0.19	0.44	0	0	0	0
GCA_900013345.1_Clostridioides_difficile_VL_0151_Contig_ST1	ST1		0.73	1	1	1	1	1	0.29	0.43	0	0.15	0.68	0.59	0.74	0.3	0.38	0	0	0.1	0	0	0	0	0	0	0	0.15	0	1	1	1	1	1	1	1	1	1	1	1	1	0.59	0.15	0.19	0.44	0	0	0	0
GCA_900013395.1_Clostridioides_difficile_VL_0457_Contig_ST1	ST1		0.73	1	1	1	1	1	0.27	0	0	0.15	0.68	0.59	0.74	0.3	0.38	0	0	0.1	0	0	0	0	0	0	0	0.15	0	0	0.08	0	0	0.12	0.21	0.31	0.3	0.23	0.29	0.34	0	0	0.15	0.19	0.1	0	0	0	0
GCA_900013645.1_Clostridioides_difficile_VL_0244_Contig_ST1	ST1		0.73	1	1	1	1	1	0.29	0.43	0	0.15	0.68	0.59	0.74	0.3	0.38	0	0	0.1	0	0	0	0	0	0	0	0.15	0	1	1	1	1	1	1	1	1	1	1	1	1	0.59	0.15	0.19	0.44	0	0	0	0
GCA_900013655.1_Clostridioides_difficile_VL_0245_Contig_ST1	ST1		0.73	1	1	1	1	1	0.29	0.43	0	0.15	0.68	0.59	0.74	0.3	0.38	0	0	0.1	0	0	0	0	0	0	0.13	0.3	0	1	1	1	1	1	1	1	1	1	1	1	1	0.59	0.15	0.19	0.44	0.18	0	0	0
GCA_900013665.1_Clostridioides_difficile_VL_0246_Contig_ST1	ST1		0.73	1	1	1	1	1	0.29	0.43	0	0.15	0.68	0.59	0.74	0.3	0.38	0	0	0.1	0	0	0	0	0	0	0	0.15	0	1	1	1	1	0.24	1	1	1	1	1	1	1	0.59	0.15	0.19	0.44	0	0	0	0
GCA_900013685.1_Clostridioides_difficile_VL_0248_Contig_ST1	ST1		0.73	1	1	1	1	1	0.29	0.43	0	0.15	0.68	0.59	0.74	0.3	0.38	0	0	0.1	0	0	0	0	0	0	0	0.15	0	1	1	1	1	1	1	1	1	1	1	1	1	0.59	0.15	0.19	0.44	0	0	0	0
GCA_900013735.1_Clostridioides_difficile_VL_0260_Contig_ST1	ST1		0.73	1	1	1	1	1	0.29	0.43	0	0.15	0.68	0.59	0.74	0.3	0.38	0	0	0.1	0	0	0	0	0	0	0	0.15	0	1	1	1	1	1	1	1	1	1	1	1	1	0.59	0.15	0.19	0.44	0	0	0	0
GCA_900013805.1_Clostridioides_difficile_VL_0274_Contig_ST1	ST1		0.73	1	1	1	1	1	0.29	0.43	0	0.15	0.68	0.59	0.74	0.3	0.38	0	0	0.1	0	0	0	0	0	0	0	0.15	0	1	1	1	1	1	1	1	1	1	1	1	1	0.59	0.15	0.19	0.44	0	0	0	0
GCA_900013815.1_Clostridioides_difficile_VL_0277_Contig_ST1	ST1		0.73	1	1	1	1	1	0.29	0.43	0	0.15	0.68	0.59	0.74	0.3	0.38	0	0	0.1	0	0	0	0	0	0	0	0.15	0	1	1	1	1	1	1	1	1	1	1	1	1	0.59	0.15	0.19	0.44	0	0	0	0
GCA_900013845.1_Clostridioides_difficile_VL_0286_Contig_ST1	ST1		0.73	1	1	1	1	1	0.29	0.43	0	0.15	0.68	0.59	0.74	0.3	0.38	0	0	0.1	0	0	0	0	0	0	0	0.15	0	1	1	0.99	1	1	0.92	0.62	1	1	1	1	1	0.59	0.15	0.19	0.44	0	0	0	0
GCA_900013895.1_Clostridioides_difficile_VL_0305_Contig_ST1	ST1		0.73	1	1	1	1	1	0.29	0.43	0	0.15	0.68	0.59	0.74	0.3	0.38	0	0	0.1	0	0	0	0	0	0	0	0.15	0	1	1	1	1	1	1	1	1	1	1	1	1	0.59	0.15	0.19	0.44	0	0	0	0
GCA_900013955.1_Clostridioides_difficile_VL_0318_Contig_ST1	ST1		0.73	1	1	1	1	1	0.29	0.43	0	0.15	0.68	0.59	0.74	0.3	0.38	0	0	0.1	0	0	0	0	0	0	0	0.15	0	1	1	1	1	1	1	1	1	1	1	1	1	0.59	0.15	0.19	0.44	0	0	0	0
GCA_900014035.1_Clostridioides_difficile_VL_0329_Contig_ST1	ST1		0.73	1	1	1	1	1	0.29	0.43	0	0.15	0.68	0.59	0.74	0.3	0.38	0	0	0.1	0	0	0	0	0	0	0	0.15	0	1	1	1	1	1	1	1	1	1	1	1	1	0.59	0.15	0.19	0.44	0	0	0	0
GCA_900014055.1_Clostridioides_difficile_VL_0335_Contig_ST1	ST1		0.73	1	1	1	1	1	0.29	0.43	0	0.15	0.68	0.59	0.74	0.3	0.38	0	0	0.1	0	0	0	0	0	0	0	0.15	0	1	1	1	1	1	1	1	1	1	1	1	1	0.59	0.15	0.19	0.44	0	0	0	0
GCA_900014085.1_Clostridioides_difficile_VL_0340_Contig_ST1	ST1		0.73	1	1	1	1	1	0.29	0.43	0	0.15	0.68	0.59	0.74	0.3	0.38	0	0	0.1	0	0	0	0	0	0	0	0.15	0	1	1	1	1	1	1	1	1	1	1	1	1	0.59	0.15	0.19	0.44	0	0	0	0
GCA_900014105.1_Clostridioides_difficile_VL_0344_Contig_ST1	ST1		0.73	1	1	1	1	1	0.27	0.43	0	0.15	0.68	0.59	0.74	0.3	0.38	0	0	0.1	0	0	0	0	0	0	0	0.15	0	1	1	0.63	1	0.84	0.36	1	0.6	1	1	1	1	0.59	0.15	0.19	0.44	0	0	0	0
GCA_900014155.1_Clostridioides_difficile_VL_0316_Contig_ST1	ST1		0.73	1	1	1	1	1	0.29	0.43	0	0.15	0.68	0.59	0.74	0.3	0.38	0	0	0.1	0	0	0	0	0	0	0	0.15	0	1	1	1	1	1	1	1	1	1	1	1	1	0.59	0.15	0.19	0.44	0	0	0	0
GCA_900014195.1_Clostridioides_difficile_VL_0451_Contig_ST1	ST1		0.73	1	1	1	1	1	0.27	0.43	0	0.15	0.68	0.59	0.74	0.3	0.38	0	0	0.1	0	0	0	0	0	0	0	0.15	0	1	0.56	0.7	0.23	0.47	0.41	0.42	0.88	1	1	1	1	0.59	0.15	0.19	0.26	0	0	0	0
GCA_900014245.1_Clostridioides_difficile_VL_0131_Contig_ST1	ST1		0.73	1	0.84	1	1	1	0.29	0.43	0	0.15	0.68	0.59	0.74	0.3	0.38	0	0	0.1	0	0	0	0	0	0	0	0.15	0	1	1	1	1	1	1	1	1	1	1	1	1	0.59	0.15	0.19	0.44	0	0	0	0
GCA_900014295.1_Clostridioides_difficile_VL_0362_Contig_ST1	ST1		0.73	1	1	1	1	1	0.29	0.43	0	0.15	0.68	0.59	0.74	0.3	0.38	0	0	0.1	0	0	0	0	0	0	0	0.15	0	1	1	1	0.5	1	1	1	1	1	1	1	1	0.59	0.15	0.19	0.44	0	0	0	0
GCA_900014415.1_Clostridioides_difficile_VL_0354_Contig_ST1	ST1		0.73	1	1	1	1	1	0.29	0.43	0	0.15	0.68	0.59	0.74	0.3	0.38	0	0	0.1	0	0	0	0	0	0	0	0.15	0	1	1	1	1	1	1	1	1	1	1	1	1	0.59	0.15	0.19	0.44	0	0	0	0
GCA_900014495.1_Clostridioides_difficile_VL_0381_Contig_ST1	ST1		0.73	1	1	1	1	1	0.29	0.43	0	0.15	0.68	0.59	0.74	0.3	0.38	0	0	0.1	0	0	0	0	0	0	0	0.15	0	1	1	1	1	1	1	1	1	1	1	1	1	0.59	0.15	0.19	0.44	0	0	0	0
GCA_900014535.1_Clostridioides_difficile_VL_0389_Contig_ST1	ST1		0.73	1	1	1	1	1	0.29	0.43	0	0.15	0.68	0.59	0.74	0.3	0.38	0	0	0.1	0	0	0	0	0	0	0	0.15	0	1	1	1	1	1	1	1	1	1	1	1	1	0.59	0.15	0.19	0.44	0	0	0	0
GCA_900014585.1_Clostridioides_difficile_VL_0400_Contig_ST1	ST1		0.73	1	1	1	1	1	0.29	0.43	0	0.15	0.68	0.59	0.74	0.3	0.38	0	0	0.1	0	0	0	0	0	0	0	0.15	0	1	1	1	1	1	1	1	1	1	1	1	1	0.59	0.15	0.19	0.44	0	0	0	0
GCA_900014635.1_Clostridioides_difficile_VL_0405_Contig_ST1	ST1		0.73	1	1	1	1	0.58	0.27	0	0	0.15	0.68	0.59	0.74	0.3	0.38	0	0	0.1	0	0	0	0	0	0	0	0.15	0	0	0.08	0	0	0.12	0.21	0.31	0.3	0.23	0.29	0.34	0	0	0.15	0.19	0.1	0	0	0	0
GCA_900014655.1_Clostridioides_difficile_VL_0414_Contig_ST1	ST1		0.73	1	1	1	1	1	0.29	0.43	0	0.15	0.68	0.59	0.74	0.3	0.38	0	0	0.1	0	0	0	0	0	0	0	0.15	0	1	1	1	1	1	1	1	1	1	1	1	1	0.59	0.15	0.19	0.44	0	0	0	0
GCA_900014755.1_Clostridioides_difficile_VL_0460_Contig_ST1	ST1		0.73	1	1	1	1	1	0.29	0.43	0	0.15	0.68	0.59	0.74	0.3	0.38	0	0	0.1	0	0	0	0	0	0	0	0.15	0	1	1	1	1	1	1	1	1	1	1	1	1	0.59	0.15	0.19	0.44	0	0	0	0
GCA_900014765.1_Clostridioides_difficile_VL_0461_Contig_ST1	ST1		0.73	1	1	1	1	1	0.27	0.23	0	0.15	0.68	0.59	0.74	0.3	0.38	0	0	0.1	0	0	0	0	0	0	0	0.15	0	0.53	0.26	0	0	0.12	0.21	0.31	0.31	0.23	1	1	1	0.3	0.15	0.19	0.16	0	0	0	0
GCA_900014895.1_Clostridioides_difficile_VL_0121_Contig_ST1	ST1		0.73	1	1	1	1	1	0.29	0.43	0	0.15	0.68	0.59	0.74	0.3	0.38	0	0	0.1	0	0	0	0	0	0	0	0.15	0	1	1	1	1	1	1	1	1	1	1	1	1	0.59	0.15	0.19	0.44	0	0	0	0
GCA_900014945.1_Clostridioides_difficile_VL_0417_Contig_ST1	ST1		0.73	1	1	1	1	1	0.29	0.43	0	0.15	0.68	0.59	0.74	0.3	0.38	0	0	0.1	0	0	0	0	0	0	0	0.15	0	1	1	1	1	1	1	1	1	1	1	1	1	0.59	0.15	0.19	0.44	0	0	0	0
GCA_900015025.1_Clostridioides_difficile_VL_0075_Contig_ST1	ST1		0.73	1	1	1	1	1	0.29	0.43	0	0.15	0.68	0.59	0.74	0.3	0.38	0	0	0.1	0	0	0	0	0	0	0	0.15	0	1	1	1	1	1	1	1	1	1	1	1	1	0.59	0.15	0.19	0.44	0	0	0	0
GCA_900015035.1_Clostridioides_difficile_VL_0124_Contig_ST1	ST1		0.73	1	1	1	1	1	0.29	0.43	0	0.15	0.68	0.59	0.74	0.3	0.38	0	0	0.1	0	0	0	0	0	0	0	0.15	0	1	1	1	1	1	0.55	1	1	1	1	1	1	0.59	0.15	0.19	0.44	0	0	0	0
GCA_900015075.1_Clostridioides_difficile_VL_0423_Contig_ST1	ST1		0.73	1	1	1	1	1	0.29	0.43	0	0.15	0.68	0.59	0.74	0.3	0.38	0	0	0.1	0	0	0	0	0	0	0	0.15	0	1	1	1	1	1	1	1	1	1	1	1	1	0.59	0.15	0.19	0.44	0	0	0	0
GCA_900015115.1_Clostridioides_difficile_VL_0249_Contig_ST1	ST1		0.73	1	1	1	1	1	0.29	0.43	0	0.15	0.68	0.59	0.74	0.3	0.38	0	0	0.1	0	0	0	0	0	0	0	0.15	0	1	1	1	1	1	1	1	1	1	1	1	1	0.59	0.15	0.19	0.44	0	0	0	0
GCA_900015135.1_Clostridioides_difficile_VL_0317_Contig_ST1	ST1		0.73	1	1	1	1	1	0.29	0.43	0	0.15	0.68	0.59	0.74	0.3	0.38	0	0	0.1	0	0	0	0	0	0	0	0.15	0	1	1	1	1	0.99	0.92	1	1	1	1	1	1	0.59	0.15	0.19	0.44	0	0	0	0
GCA_900015145.1_Clostridioides_difficile_VL_0323_Contig_ST1	ST1		0.73	1	1	1	1	1	0.29	0.43	0	0.15	0.68	0.59	0.74	0.3	0.38	0	0	0.1	0	0	0	0	0	0	0	0.15	0	1	1	1	1	1	1	1	1	1	1	1	1	0.59	0.15	0.19	0.44	0	0	0	0
GCA_900015155.1_Clostridioides_difficile_VL_0374_Contig_ST1	ST1		0.73	1	1	1	1	1	0.29	0.43	0	0.15	0.68	0.59	0.74	0.3	0.38	0	0	0.1	0	0	0	0	0	0	0	0.15	0	1	1	1	1	1	1	1	1	1	1	1	1	0.59	0.15	0.19	0.44	0	0	0	0
GCA_900015255.1_Clostridioides_difficile_VL_0207_Contig_ST1	ST1		0.73	1	1	1	1	1	0.29	0.43	0	0.15	0.68	0.59	0.74	0.3	0.38	0	0	0.1	0	0	0	0	0	0	0	0.15	0	1	1	1	1	1	1	1	1	1	1	1	1	0.59	0.15	0.19	0.44	0	0	0	0
GCA_900015325.1_Clostridioides_difficile_VL_0186_Contig_ST1	ST1		0.73	1	0.84	1	1	1	0.29	0.43	0	0.15	0.68	0.59	0.74	0.3	0.38	0	0	0.1	0	0	0	0	0	0	0	0.15	0	1	0.59	0.61	1	0.53	0.47	0.6	1	0.64	1	1	1	0.59	0.15	0.19	0.22	0	0	0	0
GCA_900015335.1_Clostridioides_difficile_VL_0188_Contig_ST1	ST1		0.73	1	1	1	1	1	0.29	0.43	0	0.15	0.68	0.59	0.74	0.3	0.38	0	0	0.1	0	0	0	0	0	0	0	0.15	0	1	1	1	1	1	1	1	1	1	1	1	1	0.59	0.15	0.19	0.44	0	0	0	0
GCA_900015365.1_Clostridioides_difficile_VL_0379_Contig_ST1	ST1		0.73	1	1	1	1	1	0.29	0.43	0	0.15	0.68	0.59	0.74	0.3	0.38	0	0	0.1	0	0	0	0	0	0	0	0.15	0	1	1	1	1	1	1	1	1	0.75	1	1	1	0.59	0.15	0.19	0.44	0	0	0	0
GCA_900015575.1_Clostridioides_difficile_VL_0021_Contig_ST1	ST1		0.73	1	1	1	1	1	0.29	0.43	0	0.15	0.68	0.59	0.74	0.3	0.38	0	0	0.1	0	0	0	0	0	0	0	0.15	0	1	1	1	1	1	1	1	1	1	1	1	1	0.59	0.15	0.19	0.44	0	0	0	0
GCA_900015585.1_Clostridioides_difficile_VL_0042_Contig_ST1	ST1		0.73	1	1	1	1	1	0.29	0.43	0	0.15	0.68	0.59	0.74	0.3	0.38	0	0	0.1	0	0	0	0	0	0	0	0.15	0	1	1	1	1	1	1	1	1	1	1	1	1	0.59	0.15	0.19	0.44	0	0	0	0
GCA_900015645.1_Clostridioides_difficile_VL_0257_Contig_ST1	ST1		0.73	1	1	1	1	1	0.29	0.43	0	0.15	0.68	0.59	0.74	0.3	0.38	0	0	0.1	0	0	0	0	0	0	0	0.15	0	1	1	1	1	1	1	1	1	1	1	1	1	0.59	0.15	0.19	0.44	0	0	0	0
GCA_900016335.1_Clostridioides_difficile_VL_0385_Contig_ST1	ST1		0.73	1	1	1	1	1	0.29	0.43	0	0.15	0.68	0.59	0.74	0.3	0.38	0	0	0.1	0	0	0	0	0	0	0	0.15	0	1	1	1	1	1	1	1	1	1	1	1	1	0.59	0.15	0.19	0.44	0	0	0	0
GCA_900016345.1_Clostridioides_difficile_VL_0386_Contig_ST1	ST1		0.73	1	1	1	1	1	0.29	0.43	0	0.15	0.68	0.59	0.74	0.3	0.38	0	0	0.1	0	0	0	0	0	0	0	0.15	0	1	1	1	1	1	1	1	1	1	1	1	1	0.59	0.15	0.19	0.44	0	0	0	0
GCA_900019305.1_Clostridioides_difficile_VL_0036_Contig_ST1	ST1		0.73	1	1	1	1	1	0.29	0.43	0	0.15	0.68	0.59	0.74	0.3	0.38	0	0	0.1	0	0	0	0	0	0	0	0.15	0	1	1	1	1	1	1	1	1	1	1	1	1	0.59	0.15	0.19	0.44	0	0	0	0
SAMEA3467896_ST1	ST1		0.73	1	1	1	1	1	0.29	0.43	0	0.15	0.68	0.59	0.74	0.3	0.38	0	0	0.1	0	0	0	0	0	0	0	0.15	0	1	1	1	1	0.98	1	1	1	1	1	1	1	0.59	0.15	0.19	0.44	0	0	0	0
SAMEA3467897_ST1	ST1		0.73	1	1	1	1	1	0.29	0.43	0	0.15	0.68	0.59	0.74	0.3	0.38	0	0	0.1	0	0	0	0	0	0	0	0.15	0	1	1	1	1	1	1	1	1	1	1	1	1	0.59	0.15	0.19	0.44	0	0	0	0
SAMEA3467899_ST1	ST1		0.73	1	1	1	1	1	0.29	0.43	0	0.15	0.68	0.59	0.74	0.3	0.38	0	0	0.1	0	0	0	0	0	0	0	0.15	0	1	1	1	1	1	1	1	1	1	1	1	1	0.59	0.15	0.19	0.44	0	0	0	0
SAMEA3467900_ST1	ST1		0.73	1	1	1	1	1	0.29	0.43	0	0.15	0.68	0.59	0.74	0.3	0.38	0	0	0.1	0	0	0	0	0	0	0	0.15	0	1	1	1	1	1	1	1	1	1	1	1	1	0.59	0.15	0.19	0.44	0	0	0	0
SAMEA3467901_ST1	ST1		0.73	1	1	1	1	1	0.29	0.43	0	0.15	0.68	0.59	0.74	0.3	0.38	0	0	0.1	0	0	0	0	0	0	0	0.15	0	1	1	1	1	1	1	1	1	1	1	1	1	0.59	0.15	0.19	0.44	0	0	0	0
SAMEA3467902_ST1	ST1		0.73	1	1	1	1	1	0.29	0.43	0	0.15	0.68	0.59	0.74	0.3	0.38	0	0	0.1	0	0	0	0	0	0	0	0.15	0	1	1	1	1	1	1	1	1	1	1	1	1	0.59	0.15	0.19	0.44	0	0	0	0
SAMEA3467903_ST1	ST1		0.73	1	1	1	1	1	0.29	0.43	0	0.15	0.68	0.59	0.74	0.3	0.38	0	0	0.1	0	0	0	0	0	0	0	0.15	0	1	1	1	1	1	1	1	1	1	1	1	1	0.59	0.15	0.19	0.44	0	0	0	0
SAMEA3467904_ST1	ST1		0.73	1	1	1	1	1	0.29	0.43	0	0.15	0.68	0.59	0.74	0.3	0.38	0	0	0.1	0	0.18	0	0	0	0	0	0.15	0	1	1	1	1	1	1	1	1	1	1	1	1	0.59	0.15	0.19	0.44	0	0	0	0
SAMEA3467906_ST1	ST1		0.73	1	1	1	1	1	0.27	0	0	0.15	0.68	0.59	0.74	0.3	0.38	0	0	0.1	0	0	0	0	0	0	0	0.15	0	0	0.08	0	0	0.12	0.21	0.31	0.3	0.23	0.32	0.34	0	0	0.15	0.19	0.1	0	0	0	0
SAMEA3467933_ST1	ST1		0.73	1	1	1	1	1	0.29	0.43	0	0.15	0.68	0.59	0.74	0.3	0.38	0	0	0.1	0	0	0	0	0	0	0	0.15	0	1	1	1	1	1	1	1	1	1	1	1	1	0.59	0.15	0.19	0.44	0	0	0	0
SAMEA3467934_ST1	ST1		0.73	1	1	1	1	1	0.29	0.43	0	0.15	0.68	0.59	0.74	0.3	0.38	0	0	0.1	0	0	0	0	0	0	0	0.15	0	1	1	1	1	1	1	1	1	1	1	1	1	0.59	0.15	0.19	0.44	0	0	0	0
SAMN03473811_ST1	ST1		0.73	1	1	1	1	1	0.27	0.4	0	0.25	0.68	0.59	0.74	0.3	0.38	0	0	0.1	0	0.25	0.22	0	0	0	0.16	0.6	0	0.41	0.08	0	0	0.12	0.21	0.31	0.3	0.32	0.29	0.34	1	0.39	0.15	0.19	0.1	0.38	0.22	0	0.15
SAMN03473812_ST1	ST1		0.73	1	1	1	1	1	0.27	0.4	0	0.25	0.68	0.59	0.74	0.3	0.38	0	0	0.1	0	0.25	0.22	0	0	0	0.16	0.6	0	0.41	0.08	0	0	0.12	0.21	0.31	0.3	0.32	0.29	0.34	1	0.39	0.15	0.19	0.1	0.38	0.22	0	0.15
SAMN03473813_ST1	ST1		0.73	1	1	1	1	1	0.27	0	0	0.25	0.96	0.98	0.99	1	1	0.98	0	0.29	0.31	0	0	0	0	0.2	0	0.15	0	0	0.08	0	0	0.12	0.21	0.31	0.3	0.32	0.29	0.34	1	0	0.15	0.19	0.1	0	0	0	0.04
SAMN03473816_ST1	ST1		0.73	1	1	1	1	1	0.27	0	0	0.25	0.68	0.59	0.74	0.3	0.38	0	0	0.1	0	0	0	0	0	0	0	0.15	0	0	0.08	0	0	0.12	0.21	0.31	0.3	0.32	0.29	0.34	1	0	0.15	0.19	0.1	0	0	0	0
SAMN03473819_ST1	ST1		0.73	1	1	1	1	1	0.27	0	0	0.25	0.68	0.59	0.74	0.3	0.38	0	0	0.1	0	0	0	0	0	0	0	0.15	0	0	0.08	0	0	0.12	0.21	0.31	0.3	0.32	0.29	0.34	1	0	0.15	0.19	0.1	0	0	0	0
SAMN03473822_ST1	ST1		0.73	1	1	1	1	1	0.29	0.43	0	0.15	0.68	0.59	0.74	0.3	0.38	0	0	0.1	0	0	0	0	0	0	0	0.15	0	1	1	1	1	1	1	1	1	1	1	1	1	0.59	0.15	0.19	0.44	0	0	0	0
SAMN03473828_ST1	ST1		0.73	1	1	1	1	1	0.27	0	0	0.25	0.68	0.59	0.74	0.3	0.38	0	0	0.1	0	0	0	0	0	0	0	0.15	0	0	0.08	0	0	0.12	0.21	0.31	0.3	0.32	0.29	0.34	1	0	0.15	0.19	0.1	0	0	0	0
SRR2047584_ST1	ST1		0.73	1	1	1	1	1	0.27	0	0	0.25	0.96	0.98	0.99	1	1	0.98	0	0.29	0.31	0	0	0	0	0.2	0	0.15	0	0	0.08	0	0	0.12	0.21	0.31	0.3	0.32	0.29	0.34	1	0	0.15	0.19	0.1	0	0	0	0.04
SRR2047585_ST1	ST1		0.73	1	1	1	1	1	0.27	0	0	0.25	0.96	0.98	0.99	1	1	0.98	0	0.29	0.31	0	0	0	0	0.2	0	0.15	0	0	0.08	0	0	0.12	0.21	0.31	0.3	0.32	0.29	0.34	1	0	0.15	0.19	0.1	0	0	0	0.04
SRR2047594_ST1	ST1		0.73	1	1	1	1	1	0.27	0	0	0.25	0.96	0.98	0.99	1	1	0.98	0	0.29	0.31	0	0	0	0	0.2	0	0.15	0	0	0.08	0	0	0.12	0.21	0.31	0.3	0.32	0.29	0.34	1	0	0.15	0.19	0.1	0	0	0	0.04
SRR2047595_ST1	ST1		0.73	1	1	1	1	1	0.27	0	0	0.25	0.96	0.98	0.99	1	1	0.98	0	0.29	0.31	0	0	0	0	0.2	0	0.15	0	0	0.08	0	0	0.12	0.21	0.31	0.3	0.32	0.29	0.34	1	0	0.15	0.19	0.1	0	0	0	0.04
SRR2047596_ST1	ST1		0.73	1	1	1	1	1	0.27	0	0	0.25	0.68	0.59	0.74	0.3	0.38	0	0	0.1	0	0	0	0	0	0	0	0.15	0	0	0.08	0	0	0.12	0.21	0.31	0.3	0.32	0.29	0.34	1	0	0.15	0.19	0.1	0	0	0	0
SRR2047603_ST1	ST1		0.73	1	1	1	1	1	0.27	0	0	0.25	0.68	0.59	0.74	0.3	0.38	0	0	0.1	0	0	0	0	0	0	0	0.15	0	0	0.08	0	0	0.12	0.21	0.31	0.3	0.32	0.29	0.34	1	0	0.15	0.19	0.1	0	0	0	0
SRR2047617_ST1	ST1		0.73	1	1	1	1	1	0.29	0.43	0	0.15	0.68	0.59	0.74	0.3	0.38	0	0	0.1	0	0	0	0	0	0	0	0.15	0	1	1	1	1	1	1	1	1	1	1	1	1	0.59	0.15	0.19	0.44	0	0	0	0
SRR2047823_ST1	ST1		0.73	1	1	1	1	1	0.27	0	0	0.25	0.96	0.98	0.99	1	1	0.98	0	0.29	0.31	0	0	0	0	0.2	0	0.15	0	0	0.08	0	0	0.12	0.21	0.31	0.3	0.32	0.29	0.34	1	0	0.15	0.19	0.1	0	0	0	0.04
SRR2047842_ST1	ST1		0.73	1	1	1	1	1	0.27	0	0	0.25	0.96	0.98	0.99	1	1	0.98	0	0.29	0.31	0	0	0	0	0.2	0	0.15	0	0	0.08	0	0	0.12	0.21	0.31	0.3	0.32	0.29	0.34	1	0	0.15	0.19	0.1	0	0	0	0.04
SRR2047849_ST1	ST1		0.73	1	1	1	1	1	0.27	0	0	0.25	0.96	0.98	0.99	1	1	0.98	0	0.29	0.31	0	0	0	0	0.2	0	0.15	0	0	0.08	0	0	0.12	0.21	0.31	0.3	0.32	0.29	0.34	1	0	0.15	0.19	0.1	0	0	0	0.04
SRR4300546_ST1	ST1		0.73	1	1	1	1	0.06	0.29	0.43	0	0.15	0.68	0.59	0.74	0.3	0.38	0	0	0.1	0	0	0	0	0	0	0	0.15	0	1	1	1	1	1	1	1	1	1	1	1	1	0.59	0.15	0.19	0.44	0	0	0	0
SRR4300547_ST1	ST1		0.73	1	1	1	1	0.06	0.29	0.43	0	0.15	0.68	0.59	0.74	0.3	0.38	0	0	0.1	0	0	0	0	0	0	0	0.15	0	1	1	1	1	1	1	1	1	1	1	1	1	0.59	0.15	0.19	0.44	0	0	0	0
SRR4300552_ST1	ST1		0.73	1	1	1	1	1	0.27	0	0	0.25	0.68	0.59	0.74	0.3	0.38	0	0	0.28	0.3	0	0	0	0	0	0	0.15	0	0	0.08	0	0	0.12	0.21	0.31	0.3	0.39	0.29	0.34	1	0	0.22	0.19	0.1	0	0	0	0
SRR4300553_ST1	ST1		0.73	1	1	1	1	1	0.27	0	0	0.25	0.68	0.59	0.74	0.3	0.38	0	0	0.28	0.3	0	0	0	0	0	0	0.15	0	0	0.08	0	0	0.12	0.21	0.31	0.3	0.39	0.29	0.34	1	0	0.22	0.19	0.1	0	0	0	0
SRR4300562_ST1	ST1		0.73	1	1	1	1	1	0.27	0	0	0.25	0.68	0.59	0.74	0.3	0.38	0	0	0.28	0.3	0	0	0	0	0	0	0.15	0	0	0.08	0	0	0.12	0.21	0.31	0.3	0.39	0.29	0.34	1	0	0.22	0.19	0.1	0	0	0	0
SRR4300563_ST1	ST1		0.73	1	1	1	1	1	0.27	0	0	0.25	0.68	0.59	0.74	0.3	0.38	0	0	0.28	0.3	0	0	0	0	0	0	0.15	0	0	0.08	0	0	0.12	0.21	0.31	0.3	0.39	0.29	0.34	1	0	0.22	0.19	0.1	0	0	0	0
SRR4300578_ST1	ST1		0.73	1	1	1	1	1	0.27	0	0	0.25	0.68	0.59	0.74	0.3	0.38	0	0	0.28	0.3	0	0	0	0	0	0	0.15	0	0	0.08	0	0	0.12	0.21	0.31	0.3	0.39	0.29	0.34	1	0	0.22	0.19	0.1	0	0	0	0
SRR4300579_ST1	ST1		0.73	1	1	1	1	1	0.27	0	0	0.25	0.68	0.59	0.74	0.3	0.38	0	0	0.28	0.3	0	0	0	0	0	0	0.15	0	0	0.08	0	0	0.12	0.21	0.31	0.3	0.39	0.29	0.34	1	0	0.22	0.19	0.1	0	0	0	0
SRR4300580_ST1	ST1		0.73	1	1	1	1	1	0.27	0	0	0.25	0.68	0.59	0.74	0.3	0.38	0	0	0.28	0.3	0	0	0	0	0	0	0.15	0	0	0.08	0	0	0.12	0.21	0.31	0.3	0.39	0.29	0.34	1	0	0.22	0.19	0.1	0	0.15	0	0
SRR5169300_ST1	ST1		0.73	1	1	1	1	1	0.27	0	0	0.25	0.96	0.98	0.99	1	1	0.98	0	0.29	0.31	0	0	0	0	0.2	0	0.15	0	0	0.08	0	0	0.12	0.21	0.31	0.3	0.39	0.29	0.34	1	0	0.22	0.19	0.1	0	0.14	0	0.04
SRR593294_ST1	ST1		0.73	1	1	1	1	1	0.29	0.43	0	0.17	0.68	0.59	0.74	0.3	0.38	0	0	0.1	0	0	0	0	0	0	0	0.15	0	1	1	1	1	1	1	1	1	1	1	1	1	0.59	0.15	0.19	0.44	0	0	0	0
SRR593312_ST1	ST1		0.73	1	1	1	1	1	0.29	0.43	0	0.15	0.68	0.59	0.74	0.3	0.38	0	0	0.1	0	0	0	0	0	0	0	0.15	0	1	1	1	1	1	1	1	1	1	1	1	1	0.59	0.15	0.19	0.44	0	0	0	0
SRR593320_ST1	ST1		0.73	1	1	1	1	1	0.29	0.43	0	0.15	0.68	0.59	0.74	0.3	0.38	0	0	0.1	0	0	0	0	0	0	0	0.15	0	1	1	1	1	1	1	1	1	1	1	1	1	0.59	0.15	0.19	0.44	0	0	0	0
SRR5945685_ST1	ST1		0.73	1	1	1	1	1	1	1	1	1	1	1	1	1	1	1	1	1	1	0.99	1	1	1	1	1	1	1	1	1	1	1	1	1	1	1	1	1	1	1	1	1	1	1	1	0.99	0.99	1
SRR5945686_ST1	ST1		0.73	1	1	1	1	1	1	1	1	1	1	1	1	1	1	1	1	1	1	0.99	1	1	1	1	1	1	1	1	1	1	1	1	1	1	1	1	1	1	1	1	1	1	1	1	0.99	0.99	1
SRR5945687_ST1	ST1		0.73	1	1	1	1	1	1	1	1	1	1	1	1	1	1	1	1	1	1	0.99	1	1	1	1	1	1	1	1	1	1	1	1	1	1	1	1	1	1	1	1	1	1	1	1	0.99	0.99	1
SRR5945688_ST1	ST1		0.73	1	1	1	1	1	1	1	1	1	1	1	1	1	1	1	1	1	1	0.99	1	1	1	1	1	1	1	1	1	1	1	1	1	1	1	1	1	1	1	1	1	1	1	1	0.99	0.99	1
SRR776481_ST1	ST1		0.73	1	1	1	1	1	0.27	0	0	0.15	0.68	0.59	0.74	0.3	0.38	0	0	0.1	0	0	0	0	0	0	0	0.15	0	0	0.08	0	0	0.12	0.21	0.31	0.3	0.23	0.29	0.34	0	0	0.15	0.19	0.1	0	0	0	0
GCA_000449025.2_Clostridioides_difficile_CD43_Contig_ST10	ST10		0.9	0.99	0.99	0.97	0.99	0.21	0.07	0	0.13	0.17	0.68	0.58	0.74	0.3	0.38	0	0	0.1	0	0	0	0	0	0	0	0.15	0	0	0.09	0	0	0.12	0	0.1	0.07	0.33	0.29	0.34	0.93	0	0.15	0.19	0.11	0	0	0	0
GCA_000449305.2_Clostridioides_difficile_CD131_Contig_ST10	ST10		0.9	0.51	0.99	0.97	0.99	0.21	0.07	0	0.13	0.17	0.68	0.58	0.74	0.3	0.38	0	0	0.1	0	0	0	0	0	0	0	0.15	0	0	0.09	0	0	0.12	0	0.1	0.07	0.33	0.29	0.34	0.93	0	0.15	0.19	0.11	0	0	0	0
GCA_000449385.2_Clostridioides_difficile_CD149_Contig_ST10	ST10		0.9	0.99	0.99	0.97	0.99	0.33	0.07	0	0.13	0.17	0.68	0.58	0.74	0.3	0.38	0	0	0.1	0	0	0	0	0	0	0	0.15	0	0	0.09	0	0	0.12	0	0.1	0.07	0.33	0.29	0.34	0.93	0	0.15	0.19	0.11	0	0	0	0
GCA_000449465.2_Clostridioides_difficile_CD166_Contig_ST10	ST10		0.9	0.99	0.99	0.97	0.99	0.11	0.07	0	0.13	0.14	0.68	0.58	0.74	0.3	0.38	0	0	0.1	0	0.15	0	0	0	0	0	0.15	0	0	0.09	0	0	0.12	0	0.1	0.07	0.33	0.29	0.34	0.93	0	0.15	0.19	0.11	0	0	0	0
GCA_000450725.2_Clostridioides_difficile_F152_Contig_ST10	ST10		0.9	0.99	0.99	0.97	0.99	0.11	0.07	0	0.13	0.14	0.68	0.58	0.74	0.3	0.38	0	0	0.1	0	0	0	0	0	0	0	0.15	0	0	0.09	0	0	0.12	0	0.1	0.07	0.33	0.29	0.34	0.93	0	0.15	0.19	0.11	0	0	0	0
GCA_000451585.2_Clostridioides_difficile_P8_Contig_ST10	ST10		0.9	0.99	0.99	0.97	0.99	0.2	0.07	0	0.13	0.14	0.67	0.58	0.74	0.3	0.38	0	0	0.1	0	0	0	0	0	0	0	0.15	0	0	0.09	0	0	0.12	0	0.1	0.07	0.33	0.29	0.34	0.93	0	0.15	0.19	0.11	0	0	0	0
GCA_000452065.2_Clostridioides_difficile_P69_Contig_ST10	ST10		0.9	0.99	0.99	0.97	0.99	0.11	0.07	0	0.13	0.17	0.68	0.58	0.74	0.3	0.38	0	0	0.1	0	0	0	0	0	0	0	0.15	0	0	0.09	0	0	0.12	0	0.1	0.07	0.33	0.29	0.34	0.93	0	0.15	0.19	0.1	0	0	0	0
GCA_000452405.2_Clostridioides_difficile_CD86_Contig_ST10	ST10		0.9	0.99	0.99	0.97	0.99	0.2	0.07	0	0.13	0.17	0.68	0.58	0.74	0.3	0.38	0	0	0.1	0	0	0	0	0	0	0	0.15	0	0	0.09	0	0	0.12	0	0.1	0.07	0.33	0.29	0.34	0.93	0	0.15	0.19	0.11	0	0	0	0
GCA_001972185.1_Clostridioides_difficile_20121190_Contig_ST10	ST10		0.9	0.99	0.99	0.97	0.99	0.2	0.07	0	0	0.17	0.68	0.58	0.74	0.3	0.38	0	0	0.1	0	0	0	0	0	0	0	0.15	0	0	0.09	0	0	0.12	0	0.1	0.07	0.33	0.29	0.34	0.93	0	0.15	0.19	0.11	0	0	0	0
GCA_002301095.1_Clostridioides_difficile_5491-N-ST10_Contig_ST10	ST10		0.9	0.99	0.99	0.97	0.99	0.11	0.07	0	0.13	0.17	0.68	0.58	0.74	0.3	0.38	0	0	0.1	0	0	0	0	0	0	0	0.15	0	0	0.09	0	0	0.12	0	0.1	0.07	0.33	0.29	0.34	0.93	0	0.15	0.19	0.1	0	0	0	0
GCA_002302145.1_Clostridioides_difficile_7458-N-ST10_Contig_ST10	ST10		0.9	0.99	0.99	0.97	0.99	0.21	0.07	0	0	0.17	0.68	0.58	0.74	0.3	0.38	0	0	0.1	0	0	0	0	0	0	0	0.15	0	0	0.09	0	0	0.12	0	0.1	0.07	0.33	0.29	0.34	0.93	0	0.15	0.19	0.11	0	0	0	0
GCA_002303365.1_Clostridioides_difficile_6610-N-ST10_Contig_ST10	ST10		0.9	0.99	0.99	0.97	0.99	0.21	0.07	0	0.13	0.17	0.68	0.58	0.74	0.3	0.38	0	0	0.1	0	0	0	0	0	0	0	0.15	0	0	0.09	0	0	0.12	0	0.09	0.07	0.33	0.29	0.34	0.93	0	0.15	0.19	0.11	0	0	0	0
GCA_002303505.1_Clostridioides_difficile_6620-N-ST10_Contig_ST10	ST10		0.9	0.99	0.99	0.97	0.99	0.11	0.07	0	0.13	0.17	0.68	0.58	0.74	0.3	0.38	0	0	0.1	0	0	0	0	0	0	0	0.15	0	0	0.09	0	0	0.12	0	0.1	0.07	0.33	0.29	0.34	0.93	0	0.15	0.19	0.11	0	0	0	0
GCA_002303525.1_Clostridioides_difficile_6621-NonSp-ST10_Contig_ST10	ST10		0.9	0.99	0.99	0.97	0.99	0.11	0.06	0	0	0.17	0.68	0.58	0.74	0.3	0.38	0	0	0.1	0	0	0	0	0	0	0	0.15	0	0	0.09	0	0.05	0.12	0	0.1	0.06	0.33	0.29	0.34	0.93	0	0.15	0.19	0.11	0	0	0	0
GCA_900008775.1_Clostridioides_difficile_VL_0333_Contig_ST10	ST10		0.9	0.99	0.99	0.97	0.99	0.11	0.07	0	0.13	0.17	0.68	0.58	0.74	0.3	0.38	0	0	0.1	0	0	0	0	0	0	0	0.15	0	0	0.09	0	0	0.12	0	0.1	0.07	0.33	0.29	0.34	0.93	0	0.15	0.19	0.11	0	0	0	0
GCA_900010895.1_Clostridioides_difficile_VL_0085_Contig_ST10	ST10		0.9	0.99	0.99	0.97	0.99	0.11	0.07	0	0.13	0.22	0.89	0.87	0.93	0.39	0.42	0	0	0.1	0	0	0.05	0	0	0.44	0	0.15	0	0	0.09	0	0	0.12	0	0.1	0.07	0.33	0.29	0.34	0.93	0	0.15	0.19	0.11	0	0	0	0.05
GCA_900011075.1_Clostridioides_difficile_VL_0084_Contig_ST10	ST10		0.9	0.99	0.99	0.97	0.99	0.11	0.07	0	0.13	0.17	0.68	0.58	0.74	0.3	0.38	0	0	0.1	0	0	0	0	0	0	0	0.15	0	0	0.09	0	0	0.12	0	0.1	0.07	0.33	0.29	0.34	0.93	0	0.15	0.19	0.11	0	0	0	0
GCA_900011145.1_Clostridioides_difficile_VL_0282_Contig_ST10	ST10		0.9	0.99	0.99	0.97	0.99	0.11	0.07	0	0.13	0.17	0.68	0.58	0.74	0.3	0.38	0	0	0.1	0	0	0	0	0	0	0	0.15	0	0	0.09	0	0	0.12	0	0.1	0.07	0.33	0.29	0.34	0.93	0	0.14	0.19	0.11	0	0	0	0
GCA_900015925.1_Clostridioides_difficile_VL_0443_Contig_ST102	ST102		0.9	0.99	0.99	0.97	0.99	0.55	0.07	0	0.13	0.17	0.68	0.58	0.74	0.3	0.38	0	0	0.1	0	0	0	0	0	0	0	0.15	0	0	0.08	0	0	0.12	0	0.09	0.07	0.39	0.29	0.34	0	0.11	0.15	0.2	0.1	0	0	0	0
GCA_002302975.1_Clostridioides_difficile_7488-NonSp-ST103_Contig_ST103	ST103		0.88	0.07	0.15	0	0.18	0.6	0.07	0	0.13	0.25	0.68	0.58	0.74	0.3	0.38	0	0	0.1	0	0	0	0	0	0	0	0.14	0	0	0.09	0	0	0.12	0.21	0.09	0.07	0.44	0.29	0.34	1	0	0.15	0.19	0.1	0	0	0	0
GCA_900013185.1_Clostridioides_difficile_VL_0055_Contig_ST103	ST103		0.88	0.07	0.15	0	0.18	0.6	0.07	0	0.13	0.25	0.68	0.58	0.74	0.3	0.38	0	0	0.1	0	0	0	0	0	0	0	0.14	0	0	0.08	0	0	0.12	0.21	0.09	0.07	0.39	0.29	0.34	0	0.11	0.15	0.19	0.1	0	0	0	0
GCA_900073125.1_Clostridioides_difficile_CD105KSE5_Contig_ST107	ST107		0.9	0.99	0.99	0.97	0.98	0.97	0.22	0	0.13	0.22	0.68	0.58	0.74	0.51	0.58	0	0.66	0.31	0.53	0.49	0.68	0	0	0.78	0.8	0.57	0	0	0.09	0	0	0.12	0	0.28	0.26	0.39	0.29	0.34	0.24	0	0.15	0.19	0.11	0	0.21	0	0.23
GCA_900074825.1_Clostridioides_difficile_CD105KSE11_Contig_ST107	ST107		0.9	0.99	0.99	0.97	0.98	0.97	0.22	0	0	0.22	0.68	0.58	0.74	0.51	0.58	0	0.66	0.31	0.53	0.49	0.68	0	0	0.78	0.8	0.57	0	0	0.09	0	0	0.12	0	0.28	0.26	0.39	0.29	0.34	0.24	0	0.15	0.19	0.11	0	0.21	0	0.23
GCA_000451145.2_Clostridioides_difficile_Y247_Contig_ST110	ST110		0.9	0.99	0.99	0.97	0.99	0.12	0.07	0	0.13	0.25	0.68	0.58	0.74	0.3	0.37	0	0	0.1	0	0	0	0	0	0	0	0.15	0	0	0.08	0	0	0.12	0	0.09	0.07	0.39	0.29	0.34	0	0.11	0.15	0.2	0.1	0	0	0	0
GCA_000452105.2_Clostridioides_difficile_P72_Contig_ST110	ST110		0.9	0.99	0.99	0.97	0.99	0.18	0.07	0	0.13	0.25	0.68	0.58	0.74	0.3	0.37	0	0	0.1	0	0	0	0	0	0	0	0.15	0	0	0.08	0	0	0.12	0	0.09	0.07	0.39	0.29	0.34	0	0.11	0.15	0.2	0.1	0	0	0	0
GCA_002301185.1_Clostridioides_difficile_5496-Y-ST110_Contig_ST110	ST110		0.9	0.99	0.99	0.97	0.99	0.21	0.07	0	0.13	0.25	0.68	0.58	0.74	0.3	0.37	0	0	0.1	0	0	0	0	0	0	0	0.15	0	0	0.08	0	0	0.12	0	0.09	0.07	0.39	0.29	0.34	0	0.11	0.15	0.2	0.1	0	0	0	0
GCA_002301985.1_Clostridioides_difficile_6593-Y-ST110_Contig_ST110	ST110		0.9	0.99	0.99	0.97	0.99	0.21	0.07	0	0.13	0.25	0.68	0.58	0.74	0.3	0.37	0	0	0.1	0	0	0	0	0	0	0	0.15	0	0	0.08	0	0	0.12	0	0.09	0.07	0.39	0.29	0.34	0	0.11	0.15	0.2	0.1	0	0	0	0
GCA_002302205.1_Clostridioides_difficile_7464-Y-ST110_Contig_ST110	ST110		0.9	0.99	0.99	0.97	0.99	0.21	0.07	0	0.13	0.25	0.68	0.58	0.74	0.3	0.37	0	0	0.1	0	0	0	0	0	0	0	0.15	0	0	0.08	0	0	0.12	0	0.09	0.07	0.39	0.29	0.34	0	0.11	0.15	0.2	0.1	0	0	0	0
GCA_002303635.1_Clostridioides_difficile_6626-Y-ST110_Contig_ST110	ST110		0.9	0.99	0.99	0.97	0.99	0.18	0.07	0	0.13	0.25	0.68	0.58	0.74	0.3	0.37	0	0	0.1	0	0	0	0	0	0	0	0.15	0	0	0.09	0	0	0.12	0	0.09	0.07	0.39	0.29	0.34	0	0.11	0.15	0.2	0.1	0	0	0	0
GCA_900014555.1_Clostridioides_difficile_VL_0394_Contig_ST110	ST110		0.9	0.99	0.84	0.97	0.99	0.12	0.07	0	0.13	0.24	0.68	0.58	0.74	0.3	0.37	0	0	0.1	0	0	0	0	0	0	0	0.15	0	0	0.08	0	0	0.12	0	0.09	0.07	0.39	0.29	0.34	0	0.11	0.15	0.2	0.1	0	0	0	0
GCA_900015045.1_Clostridioides_difficile_VL_0284_Contig_ST110	ST110		0.9	0.99	0.99	0.97	0.99	0.12	0.07	0	0.13	0.24	0.68	0.58	0.74	0.3	0.37	0	0	0.1	0	0	0	0	0	0	0	0.15	0	0	0.08	0	0	0.12	0	0.09	0.07	0.39	0.29	0.34	0	0.11	0.15	0.2	0.1	0	0	0	0
GCA_001972105.1_Clostridioides_difficile_20111003_Contig_ST12	ST12		0.9	0.98	0.99	0.97	0.99	0.19	0.07	0	0.13	0.14	0.6	0.58	0.74	0.3	0.38	0	0	0.1	0	0	0.03	0	0	0	0	0.15	0	0	0.08	0	0	0.12	0	0.09	0.07	0.39	0.29	0.34	0	0	0.15	0.19	0.1	0	0	0	0
GCA_000452005.1_Clostridioides_difficile_P59_Contig_ST123	ST123		0.73	1	1	1	1	0.2	0.08	0	0	0.15	0.68	0.58	0.74	0.3	0.38	0	0	0.1	0	0	0.04	0	0	0.11	0	0.15	0	0	0.08	0	0	0.12	0	0.09	0.07	0.32	0.29	0.35	0	0	0.15	0.19	0.1	0	0	0	0.04
GCA_900011705.1_Clostridioides_difficile_VL_0416_Contig_ST126	ST126		0.9	0.07	0.15	0	0.1	0.19	0.07	0	0	0.25	0.67	0.58	0.74	0.3	0.38	0	0	0.1	0	0	0.03	0	0	0	0	0.15	0	0	0.08	0	0	0.12	0	0.09	0.07	0.44	0.29	0.34	0	0	0.15	0.19	0.1	0	0	0	0
GCA_900008725.1_Clostridioides_difficile_VL_0265_Contig_ST129	ST129		0.37	0.07	0.15	0	0.18	0.12	0.07	0	0.13	0.27	0.88	0.87	0.93	0.39	0.42	0	0	0.1	0	0	0.05	0	0	0.44	0	0.15	0	0	0.08	0	0	0.12	0	0.09	0.07	0.4	0.29	0.34	0	0.11	0.15	0.19	0.1	0	0	0	0
GCA_002303585.1_Clostridioides_difficile_6624-Y-ST13_Contig_ST13	ST13		0.9	0.99	0.99	0.97	0.99	0.55	0.07	0	0.13	0.16	0.68	0.58	0.74	0.3	0.38	0	0	0.1	0	0	0	0	0	0	0	0.15	0	0	0.08	0	0	0.12	0	0.09	0.07	0.39	0.29	0.34	0	0.11	0.15	0.2	0.1	0	0	0	0
GCA_000450445.2_Clostridioides_difficile_DA00211_Contig_ST139	ST139		0.9	0.98	0.99	0.97	0.98	0.12	0.1	0	0	0.25	0.68	0.58	0.74	0.3	0.38	0	0	0.1	0	0	0	0	0	0	0	0.15	0	0	0.09	0	0	0.12	0	0.11	0.12	0.39	0.29	0.34	0	0	0.15	0.19	0.1	0	0	0	0
GCA_000448805.2_Clostridioides_difficile_DA00189_Contig_ST14	ST14		0.9	0.99	0.99	0.97	0.99	0.55	0.07	0	0.13	0.25	0.68	0.58	0.74	0.3	0.38	0	0	0.1	0	0	0	0	0	0	0	0.15	0	0	0.08	0	0	0.12	0	0.09	0.07	0.39	0.29	0.34	0	0.11	0.15	0.2	0.1	0	0	0	0
GCA_000448925.2_Clostridioides_difficile_CD38_Contig_ST14	ST14		0.9	0.99	0.99	0.97	0.99	0.55	0.07	0	0.13	0.25	0.68	0.58	0.74	0.3	0.38	0	0	0.1	0	0	0	0	0	0	0	0.15	0	0	0.08	0	0	0.12	0	0.09	0.07	0.39	0.29	0.34	0	0.11	0.15	0.2	0.1	0	0	0	0
GCA_000449125.2_Clostridioides_difficile_CD49_Contig_ST14	ST14		0.9	0.99	0.99	0.97	0.99	0.37	0.07	0	0.13	0.25	0.68	0.58	0.74	0.3	0.38	0	0	0.1	0	0	0	0	0	0	0	0.15	0	0	0.08	0	0	0.12	0	0.09	0.07	0.39	0.29	0.34	0	0.11	0.15	0.2	0.1	0	0	0	0
GCA_000449965.2_Clostridioides_difficile_DA00114_Contig_ST14	ST14		0.9	0.99	0.99	0.97	0.99	0.55	0.07	0	0.13	0.25	0.68	0.58	0.74	0.3	0.38	0	0	0.1	0	0	0	0	0	0	0	0.15	0	0	0.08	0	0	0.12	0	0.09	0.07	0.39	0.29	0.34	0	0.11	0.15	0.2	0.1	0	0	0	0
GCA_000450265.2_Clostridioides_difficile_DA00174_Contig_ST14	ST14		0.9	0.99	0.99	0.97	0.99	0.55	0.07	0	0.13	0.25	0.68	0.58	0.74	0.3	0.38	0	0	0.1	0	0	0	0	0	0	0	0.15	0	0	0.08	0	0	0.12	0	0.09	0.07	0.39	0.29	0.34	0	0	0.15	0.2	0.1	0	0	0	0
GCA_000451285.2_Clostridioides_difficile_CD111_Contig_ST14	ST14		0.9	0.99	0.99	0.97	0.99	0.55	0.07	0	0.13	0.24	0.68	0.58	0.74	0.3	0.38	0	0	0.1	0	0	0	0	0	0	0	0.15	0	0	0.08	0	0	0.12	0	0.09	0.07	0.39	0.29	0.34	0	0.11	0.15	0.2	0.1	0	0	0	0
GCA_000451465.2_Clostridioides_difficile_DA00256_Contig_ST14	ST14		0.9	0.99	0.99	0.97	0.99	0.55	0.07	0	0.13	0.24	0.68	0.58	0.74	0.3	0.38	0	0	0.1	0	0	0	0	0	0.1	0	0.15	0	0	0.08	0	0	0.12	0	0.12	0.07	0.31	0.17	0.33	0	0.11	0.15	0.2	0.1	0	0	0	0
GCA_000452425.2_Clostridioides_difficile_CD88_Contig_ST14	ST14		0.9	0.99	0.99	0.97	0.99	0.55	0.07	0	0.13	0.24	0.68	0.58	0.74	0.3	0.38	0	0	0.1	0	0	0	0	0	0	0	0.15	0	0	0.08	0	0	0.12	0	0.09	0.07	0.39	0.29	0.34	0	0.11	0.15	0.2	0.11	0	0	0	0
GCA_000473665.2_Clostridioides_difficile_P64_Contig_ST14	ST14		0.9	0.99	0.99	0.97	0.99	0.55	0.07	0	0.13	0.25	0.68	0.58	0.74	0.3	0.38	0	0	0.1	0	0	0	0	0	0	0	0.15	0	0	0.08	0	0.05	0.12	0	0.09	0.07	0.39	0.29	0.34	1	0.11	0.15	0.2	0.1	0	0	0	0
GCA_001972165.1_Clostridioides_difficile_20121013_Contig_ST14	ST14		0.9	0.99	0.99	0.97	0.99	0.55	0.07	0	0.13	0.25	0.68	0.58	0.74	0.3	0.38	0	0	0.1	0	0.18	0	0	0	0	0	0.15	0	0	0.08	0	0	0.12	0	0.09	0.07	0.39	0.29	0.34	0	0.11	0.15	0.2	0.1	0	0	0	0
GCA_900011815.1_Clostridioides_difficile_VL_0048_Contig_ST14	ST14		0.9	0.99	0.99	0.97	0.99	0.55	0.07	0	0.13	0.24	0.68	0.58	0.74	0.3	0.38	0	0	0.1	0	0	0	0	0	0	0	0.15	0	0	0.08	0	0	0.12	0	0.09	0.07	0.39	0.29	0.34	0	0.11	0.15	0.2	0.1	0	0	0	0
GCA_900012795.1_Clostridioides_difficile_VL_0187_Contig_ST14	ST14		0.9	0.99	0.99	0.97	0.99	0.55	0.07	0	0.13	0.24	0.68	0.58	0.74	0.3	0.38	0	0	0.1	0	0	0	0	0	0	0	0.15	0	0	0.08	0	0	0.12	0	0.09	0.07	0.39	0.29	0.34	0	0.11	0.15	0.2	0.1	0	0	0	0
GCA_900014075.1_Clostridioides_difficile_VL_0337_Contig_ST14	ST14		0.9	0.99	0.99	0.97	0.99	0.55	0.07	0	0.13	0.25	0.68	0.58	0.74	0.3	0.38	0	0	0.1	0	0	0	0	0	0	0	0.15	0	0	0.08	0	0	0.12	0	0.09	0.07	0.39	0.29	0.34	0	0.11	0.15	0.2	0.1	0	0	0	0.05
GCA_900014275.1_Clostridioides_difficile_VL_0179_Contig_ST14	ST14		0.9	0.99	0.99	0.97	0.99	0.37	0.06	0	0.13	0.25	0.68	0.58	0.74	0.3	0.38	0	0	0.1	0	0	0	0	0	0	0	0.15	0	0	0.08	0	0	0.12	0	0.09	0.04	0.39	0.29	0.34	0	0.11	0.15	0.2	0.11	0	0	0	0
GCA_000448765.2_Clostridioides_difficile_CD34_Contig_ST15	ST15		0.89	0.98	0.99	0.97	0.99	0.55	0.08	0	0	0.16	0.68	0.58	0.74	0.3	0.37	0	0	0.1	0	0	0	0	0	0	0	0.15	0	0	0.09	0	0	0.12	0	0.11	0.07	0.36	0.29	0.34	0	0	0.15	0.2	0.1	0	0	0	0
GCA_000449705.2_Clostridioides_difficile_CD211_Contig_ST15	ST15		0.89	0.98	0.99	0.97	0.99	0.55	0.26	0	0	0.16	0.68	0.58	0.74	0.3	0.37	0	0	0.1	0	0	0	0	0	0.42	0	0.15	0	0	0.11	0	0	0.12	0	0.3	0.31	0.36	0.87	0.34	0	0	0.15	0.2	0.11	0.21	0	0	0
GCA_000452265.2_Clostridioides_difficile_F200_Contig_ST15	ST15		0.89	0.98	0.99	0.97	0.99	0.55	0.32	0.42	0	0.28	0.88	0.87	0.94	0.3	0.37	0.44	0	0.1	0	0	0	0	0	0.43	0	0.15	0	0.4	0.09	0	0	0.12	0	0.25	0.31	0.44	0.29	0.34	1	0.36	0.15	0.2	0.1	0	0	0	0.05
GCA_000452285.2_Clostridioides_difficile_F480_Contig_ST15	ST15		0.89	0.98	0.99	0.97	0.99	0.55	0.08	0	0	0.16	0.68	0.58	0.74	0.3	0.37	0	0	0.1	0	0	0	0	0	0	0	0.15	0	0	0.08	0	0	0.12	0	0.11	0.07	0.36	0.29	0.34	0	0	0.15	0.2	0.1	0	0	0	0
GCA_000452305.2_Clostridioides_difficile_F525_Contig_ST15	ST15		0.89	0.98	0.99	0.97	0.99	0.55	0.08	0	0	0.16	0.68	0.58	0.74	0.3	0.37	0	0	0.1	0	0	0	0	0	0	0	0.15	0	0	0.09	0	0	0.12	0	0.11	0.07	0.36	0.29	0.34	0	0	0.15	0.2	0.1	0	0	0	0
GCA_000452325.2_Clostridioides_difficile_F548_Contig_ST15	ST15		0.89	0.98	0.99	0.97	0.99	0.55	0.26	0	0	0.24	0.68	0.58	0.74	0.3	0.37	0	0	0.28	0.3	0	0	0	0	0.45	0	0.15	0	0	0.4	0	0	0.12	0	0.31	0.31	0.39	0.29	0.34	0	0	0.22	0.2	0.46	0.22	0	0	0
GCA_000473605.2_Clostridioides_difficile_P41_Contig_ST15	ST15		0.89	0.98	0.99	0.97	0.99	0.55	0.08	0	0	0.25	0.68	0.58	0.74	0.3	0.37	0	0	0.1	0	0	0	0	0	0.42	0	0.15	0	0	0.11	0	0	0.12	0	0.11	0.07	0.44	0.29	0.34	0	0	0.15	0.2	0.1	0.21	0	0	0
GCA_000586575.1_Clostridioides_difficile_5_3_Contig_ST15	ST15		0.89	0.98	0.99	0.97	0.99	0.55	0.08	0	0	0.16	0.68	0.58	0.74	0.3	0.37	0	0	0.1	0	0	0	0	0	0	0	0.15	0	0	0.08	0	0	0.12	0	0.11	0.07	0.36	0.29	0.34	0	0	0.15	0.2	0.1	0	0	0	0
GCA_000939295.1_Clostridioides_difficile_Scaffold_ST15	ST15		0.89	0.98	0.99	0.97	0.99	0.55	0.14	0	0	0.16	0.68	0.58	0.74	0.3	0.37	0	0	0.1	0	0	0	0	0	0.42	0	0.15	0	0	0.4	0	0	0.12	0	0.19	0.17	0.31	0.29	0.34	0	0	0.15	0.2	0.45	0.21	0	0	0
GCA_001192735.1_Clostridioides_difficile_KY62_Contig_ST15	ST15		0.89	0.98	0.99	0.97	0.99	0.55	0.08	0	0	0.16	0.68	0.58	0.74	0.3	0.37	0	0	0.1	0	0	0	0	0	0	0	0.15	0	0	0.08	0	0	0.12	0	0.11	0.07	0.36	0.29	0.34	0	0	0.15	0.2	0.1	0	0	0	0
GCA_001263655.1_Clostridioides_difficile_KY64_Contig_ST15	ST15		0.89	0.98	0.99	0.97	0.99	0.55	0.08	0	0	0.16	0.68	0.58	0.74	0.3	0.37	0	0	0.1	0	0	0	0	0	0	0	0.15	0	0	0.08	0	0	0.12	0	0.11	0.07	0.36	0.29	0.34	0	0	0.15	0.2	0.1	0	0	0	0
GCA_001263675.1_Clostridioides_difficile_KY65_Contig_ST15	ST15		0.89	0.98	0.99	0.97	0.99	0.55	0.08	0	0	0.16	0.68	0.58	0.74	0.3	0.37	0	0	0.1	0	0	0	0	0	0	0	0.15	0	0	0.08	0	0	0.12	0	0.11	0.07	0.36	0.29	0.34	0	0	0.15	0.2	0.1	0	0	0	0
GCA_001263695.1_Clostridioides_difficile_RU_17_Contig_ST15	ST15		0.89	0.98	0.99	0.97	0.99	0.55	0.07	0	0	0.16	0.68	0.58	0.74	0.3	0.37	0	0	0.1	0	0	0	0	0	0	0	0.15	0	0	0.08	0	0	0.12	0	0.11	0.07	0.36	0.29	0.34	0	0	0.15	0.2	0.1	0	0	0	0
GCA_002301105.1_Clostridioides_difficile_5492-M-ST15_Contig_ST15	ST15		0.89	0.98	0.99	0.97	0.99	0.55	0.25	0	0	0.16	0.68	0.58	0.74	0.3	0.37	0	0	0.1	0	0	0	0	0	0.43	0	0.15	0	0	0.4	0	0	0.12	0	0.31	0.31	0.31	0.29	0.34	0	0	0.15	0.2	0.46	0.22	0	0	0
GCA_002302885.1_Clostridioides_difficile_7480-M-ST15_Contig_ST15	ST15		0.89	0.98	0.99	0.97	0.99	0.55	0.26	0	0	0.16	0.68	0.58	0.74	0.3	0.37	0	0	0.1	0	0	0	0	0	0.42	0	0.15	0	0	0.11	0	0	0.12	0	0.31	0.31	0.36	0.29	0.34	0	0	0.15	0.2	0.11	0.21	0	0	0
GCA_002303125.1_Clostridioides_difficile_7498-M-ST15_Contig_ST15	ST15		0.89	0.98	0.99	0.97	0.99	0.55	0.26	0	0	0.16	0.68	0.58	0.74	0.3	0.37	0	0	0.1	0	0	0	0	0	0.43	0	0.15	0	0	0.4	0	0	0.12	0	0.31	0.31	0.36	0.29	0.34	0	0	0.15	0.2	0.46	0.22	0	0	0
GCA_900007655.1_Clostridioides_difficile_VL_0271_Contig_ST15	ST15		0.89	0.98	0.99	0.97	0.99	0.55	0.25	0	0	0.16	0.68	0.58	0.74	0.3	0.37	0	0	0.1	0	0	0	0	0	0.33	0	0.15	0	0	0.4	0	0	0.12	0	0.31	0.31	0.36	0.29	0.34	0	0	0.15	0.2	0.46	0.18	0	0	0
GCA_900008475.1_Clostridioides_difficile_VL_0267_Contig_ST15	ST15		0.89	0.98	0.99	0.97	0.99	0.55	0.08	0	0	0.16	0.68	0.58	0.74	0.3	0.37	0	0	0.1	0	0	0	0	0	0	0	0.15	0	0	0.08	0	0	0.12	0	0.11	0.07	0.36	0.29	0.34	0	0	0.15	0.2	0.1	0	0	0	0
GCA_900008635.1_Clostridioides_difficile_VL_0429_Contig_ST15	ST15		0.89	0.98	0.99	0.97	0.99	0.55	0.25	0	0	0.16	0.68	0.58	0.74	0.3	0.37	0	0	0.1	0	0	0	0	0	0.45	0	0.15	0	0	0.4	0	0	0.12	0	0.31	0.31	0.36	0.29	0.34	0	0	0.15	0.2	0.46	0.22	0	0	0
GCA_900009405.1_Clostridioides_difficile_VL_0052_Contig_ST15	ST15		0.89	0.98	0.99	0.97	0.99	0.55	0.08	0	0	0.16	0.68	0.58	0.74	0.3	0.37	0	0	0.1	0	0	0	0	0	0	0	0.15	0	0	0.09	0	0	0.12	0	0.11	0.1	0.39	0.29	0.34	1	0	0.15	0.2	0.1	0	0	0	0
GCA_900009455.1_Clostridioides_difficile_VL_0350_Contig_ST15	ST15		0.89	0.98	0.99	0.97	0.99	0.55	0.35	0	0	0.26	0.88	0.87	0.93	0.38	0.42	0	0	0.1	0	0	0	0	0	0.18	0	0.15	0	0	0.28	0	0	0.12	0	0.31	0.4	0.36	0.29	0.34	0	0	0.15	0.2	0.27	0.14	0	0	0
GCA_900009805.1_Clostridioides_difficile_VL_0135_Contig_ST15	ST15		0.89	0.98	0.99	0.97	0.99	0.55	0.08	0	0	0.25	0.68	0.58	0.74	0.3	0.37	0	0	0.1	0	0	0	0	0	0.42	0	0.15	0	0	0.11	0	0	0.12	0	0.11	0.07	0.44	0.29	0.34	0	0	0.15	0.2	0.11	0.21	0	0	0
GCA_900010965.1_Clostridioides_difficile_VL_0418_Contig_ST15	ST15		0.89	0.98	0.99	0.97	0.99	0.55	0.25	0	0	0.16	0.68	0.58	0.74	0.3	0.37	0	0	0.1	0	0	0	0	0	0.33	0	0.15	0	0	0.4	0	0	0.12	0	0.31	0.31	0.36	0.29	0.34	0	0	0.15	0.2	0.46	0.18	0	0	0
GCA_900011855.1_Clostridioides_difficile_VL_0068_Contig_ST15	ST15		0.89	0.98	0.99	0.97	0.99	0.55	0.25	0	0	0.16	0.68	0.58	0.74	0.3	0.37	0	0	0.1	0	0	0	0	0	0.33	0	0.15	0	0	0.4	0	0	0.12	0	0.31	0.31	0.36	0.29	0.34	0	0	0.15	0.2	0.46	0.18	0	0	0
GCA_900011925.1_Clostridioides_difficile_VL_0083_Contig_ST15	ST15		0.89	0.98	0.99	0.97	0.99	0.55	0.18	0.36	0	0.28	0.89	0.86	0.93	0.38	0.42	0	0	0.1	0	0	0	0	0	0.43	0.12	0.44	0	0.29	0.08	0	0	0.12	0	0.2	0.19	0.36	1	0.34	0	0.36	0.15	0.19	0.1	0.19	0	0	0.05
GCA_900012235.1_Clostridioides_difficile_VL_0155_Contig_ST15	ST15		0.89	0.98	0.99	0.97	0.99	0.55	0.26	0	0	0.16	0.68	0.58	0.74	0.3	0.37	0	0	0.1	0	0	0	0	0	0.42	0	0.15	0	0	0.11	0	0	0.12	0	0.3	0.31	0.36	0.29	0.34	0	0	0.15	0.2	0.11	0.21	0	0	0
GCA_900012925.1_Clostridioides_difficile_VL_0209_Contig_ST15	ST15		0.89	0.98	0.99	0.97	0.99	0.55	0.08	0	0	0.16	0.68	0.58	0.74	0.3	0.37	0	0	0.1	0	0	0	0	0	0	0	0.15	0	0	0.09	0	0	0.12	0	0.11	0.07	0.36	0.29	0.34	0	0	0.15	0.2	0.1	0	0	0	0
GCA_900012955.1_Clostridioides_difficile_VL_0213_Contig_ST15	ST15		0.89	0.98	0.99	0.97	0.99	0.55	0.08	0	0	0.16	0.68	0.58	0.74	0.3	0.37	0	0	0.1	0	0	0	0	0	0	0	0.15	0	0	0.09	0	0	0.12	0	0.11	0.07	0.36	0.29	0.34	0	0	0.15	0.2	0.1	0	0	0	0
GCA_900013105.1_Clostridioides_difficile_VL_0230_Contig_ST15	ST15		0.89	0.98	0.99	0.97	0.99	0.55	0.08	0	0	0.16	0.68	0.58	0.74	0.3	0.37	0	0	0.1	0	0	0	0	0	0	0	0.15	0	0	0.09	0	0	0.12	0	0.11	0.07	0.36	0.29	0.34	0	0	0.15	0.2	0.1	0	0	0	0
GCA_900014165.1_Clostridioides_difficile_VL_0359_Contig_ST15	ST15		0.89	0.98	0.99	0.97	0.99	0.55	0.08	0	0	0.16	0.68	0.58	0.74	0.3	0.37	0	0	0.1	0	0	0	0	0	0	0	0.15	0	0	0.08	0	0	0.12	0	0.11	0.07	0.36	0.29	0.34	0	0	0.15	0.2	0.1	0	0	0	0
GCA_900014595.1_Clostridioides_difficile_VL_0402_Contig_ST15	ST15		0.89	0.98	0.99	0.97	0.99	0.55	0.08	0	0	0.28	0.68	0.58	0.74	0.3	0.37	0	0	0.1	0	0	0	0	0	0.43	0	0.15	0	0	0.09	0	0	0.12	0	0.11	0.07	0.36	0.29	0.34	0	0	0.15	0.2	0.1	0	0	0	0.04
GCA_900015125.1_Clostridioides_difficile_VL_0283_Contig_ST15	ST15		0.89	0.98	0.99	0.97	0.99	0.55	0.08	0	0	0.28	0.89	0.86	0.93	0.38	0.42	0	0	0.1	0	0	0	0	0	0.43	0	0.15	0	0	0.09	0	0	0.12	0	0.11	0.07	0.36	0.29	0.34	0	0	0.15	0.2	0.1	0	0	0	0.05
GCA_900015165.1_Clostridioides_difficile_VL_0375_Contig_ST15	ST15		0.89	0.98	0.99	0.97	0.99	0.55	0.25	0	0	0.25	0.68	0.58	0.74	0.3	0.37	0	0	0.1	0	0	0	0	0	0.33	0	0.15	0	0	0.4	0	0	0.12	0	0.31	0.31	0.44	0.29	0.34	0	0	0.15	0.2	0.46	0.18	0	0	0
GCA_900074835.1_Clostridioides_difficile_CD105KSE9_Contig_ST15	ST15		0.89	0.98	0.99	0.97	0.99	0.55	0.25	0	0	0.16	0.68	0.58	0.74	0.3	0.37	0	0	0.1	0	0	0	0	0	0.45	0	0.15	0	0	0.4	0	0	0.12	0	0.31	0.31	0.36	0.29	0.34	0	0	0.15	0.2	0.46	0.22	0	0	0
GCA_900012125.1_Clostridioides_difficile_VL_0123_Contig_ST16	ST16		0.9	0.98	0.99	0.97	0.99	0.55	0.08	0	0.13	0.22	0.68	0.58	0.74	0.52	0.58	0	0	0.29	0.31	0	0	0	0	0.19	0	0.15	0	0	0.08	0	0	0.12	0.21	0.09	0.1	0.39	0.29	0.34	0	0.11	0.15	0.19	0.1	0	0	0	0.04
GCA_001497755.1_Clostridioides_difficile_IT1118_Contig_ST17	ST17		0.36	0.98	0.99	0.97	0.98	0.55	0.14	0	0	0.23	0.68	0.58	0.74	0.3	0.37	0	0	0.1	0	0	0.18	0	0	0.43	0	0.14	0	0	0.08	0	0	0.12	0	0.17	0.15	1	1	0.34	1	0	0.29	0.62	0.1	0	0.21	0	0.1
GCA_001678145.1_Clostridioides_difficile_CD8_15_Contig_ST17	ST17		0.36	0.98	0.99	0.97	0.98	0.19	0.76	0.43	0	0.23	0.68	0.58	0.74	0.3	0.37	0	0	0.1	0	0.19	0.35	0	0	0.44	0	0.14	0	0.39	0.08	0	0	0.12	0	0.26	1	1	1	0.34	1	0.35	0.29	0.63	0.1	0	0.24	0	0.24
GCA_001972045.1_Clostridioides_difficile_20110740_Contig_ST17	ST17		0.36	0.98	0.99	0.97	0.98	0.55	0.07	0	0	0.14	0.68	0.58	0.74	0.3	0.37	0	0	0.1	0	0.19	0.03	0	0	0	0	0.14	0	0	0.08	0	0	0.12	0	0.09	0.07	0.39	0.29	0.34	0	0	0.15	0.19	0.1	0	0	0	0
GCA_900008315.1_Clostridioides_difficile_VL_0030_Contig_ST17	ST17		0.36	0.98	0.99	0.97	0.98	0.55	0.07	0	0	0.14	0.68	0.58	0.74	0.3	0.37	0	0	0.1	0	0	0.03	0	0	0	0	0.14	0	0	0.08	0	0	0.12	0	0.09	0.07	0.39	0.29	0.34	0	0	0.15	0.19	0.1	0	0	0	0
GCA_900012285.1_Clostridioides_difficile_VL_0170_Contig_ST18	ST18		0.9	0.99	0.84	0.97	0.99	0.57	0.08	0.44	0.13	0.28	0.68	0.58	0.74	0.3	0.38	0	0	0.1	0	0	0	0	0	0	0	0.15	0	0.36	0.08	0	0	0.12	0.21	0.11	0.04	0.39	0.29	0.34	0	0.36	0.15	0.19	0.1	0	0	0	0
GCA_900011365.1_Clostridioides_difficile_VL_0045_Contig_ST19	ST19		0.36	0.07	0.15	0	0.18	0.18	0.09	0	0.13	0.22	0.88	0.87	0.93	0.39	0.42	0	0	0.1	0	0	0.05	0	0	0.44	0	0.15	0	0	0.08	0	0	0.12	0	0.1	0.05	0.36	0.29	0.34	0	0.11	0.15	0.19	0.1	0	0	0	0
GCA_000448745.2_Clostridioides_difficile_CD21_Contig_ST2	ST2		0.9	0.99	0.99	0.97	0.99	0.18	0.07	0	0.13	0.2	0.68	0.58	0.74	0.3	0.37	0	0	0.1	0	0	0	0	0	0	0	0.15	0	0	0.08	0	0	0.12	0	0.09	0.07	0.39	0.29	0.34	0	0.11	0.15	0.2	0.1	0	0	0	0
GCA_000449205.2_Clostridioides_difficile_DA00306_Contig_ST2	ST2		0.9	0.99	0.99	0.97	0.99	0.55	0.07	0	0.13	0.25	0.68	0.58	0.74	0.3	0.37	0	0	0.1	0	0	0	0	0	0	0	0.15	0	0	0.08	0	0	0.12	0	0.09	0.07	0.39	0.29	0.34	0	0.11	0.15	0.2	0.1	0	0	0	0
GCA_000449225.2_Clostridioides_difficile_CD70_Contig_ST2	ST2		0.9	0.99	0.99	0.97	0.99	0.18	0.07	0	0.13	0.24	0.68	0.58	0.74	0.3	0.37	0	0	0.1	0	0	0	0	0	0	0	0.15	0	0	0.08	0	0	0.12	0	0.09	0.07	0.39	0.29	0.34	0	0.11	0.15	0.2	0.1	0	0	0	0
GCA_000449245.2_Clostridioides_difficile_CD109_Contig_ST2	ST2		0.9	0.99	0.99	0.97	0.99	0.55	0.07	0	0.13	0.24	0.68	0.58	0.74	0.3	0.37	0	0	0.1	0	0	0	0	0	0	0	0.15	0	0	0.08	0	0	0.12	0	0.09	0.07	0.39	0.29	0.34	0	0.11	0.15	0.2	0.1	0	0	0	0
GCA_000449365.2_Clostridioides_difficile_CD144_Contig_ST2	ST2		0.9	0.99	0.99	0.97	0.99	0.55	0.07	0	0.13	0.25	0.68	0.58	0.74	0.3	0.38	0	0	0.1	0	0	0	0	0	0	0	0.15	0	0	0.08	0	0	0.12	0	0.09	0.07	0.39	0.29	0.34	0	0.11	0.15	0.2	0.1	0	0	0	0
GCA_000449925.2_Clostridioides_difficile_DA00062_Contig_ST2	ST2		0.9	0.99	0.99	0.97	0.99	0.18	0.07	0	0.13	0.24	0.68	0.58	0.74	0.3	0.37	0	0	0.1	0	0	0	0	0	0	0	0.15	0	0	0.08	0	0	0.12	0	0.09	0.07	0.39	0.29	0.34	0	0.11	0.15	0.2	0.1	0	0	0	0
GCA_000450045.2_Clostridioides_difficile_DA00131_Contig_ST2	ST2		0.9	0.99	0.99	0.97	0.99	0.21	0.07	0	0.13	0.25	0.68	0.58	0.74	0.3	0.37	0	0	0.1	0	0	0	0	0	0	0	0.15	0	0	0.08	0	0	0.12	0	0.09	0.07	0.39	0.29	0.34	0	0.11	0.15	0.2	0.1	0	0	0	0
GCA_000450525.2_Clostridioides_difficile_DA00232_Contig_ST2	ST2		0.9	0.99	0.99	0.97	0.99	0.21	0.07	0	0.13	0.24	0.68	0.58	0.74	0.3	0.37	0	0	0.1	0	0	0	0	0	0	0	0.15	0	0	0.08	0	0	0.12	0	0.09	0.07	0.39	0.29	0.34	0	0.11	0.15	0.2	0.1	0	0	0	0
GCA_000450585.2_Clostridioides_difficile_DA00245_Contig_ST2	ST2		0.9	0.99	0.99	0.97	0.99	0.55	0.07	0	0.13	0.24	0.68	0.58	0.74	0.3	0.37	0	0	0.1	0	0	0	0	0	0	0	0.15	0	0	0.08	0	0	0.12	0	0.09	0.07	0.39	0.29	0.34	0	0.11	0.15	0.2	0.1	0	0	0	0
GCA_000450645.2_Clostridioides_difficile_P21_Contig_ST2	ST2		0.9	0.99	0.99	0.97	0.99	0.13	0.07	0	0.13	0.25	0.68	0.58	0.74	0.3	0.37	0	0	0.1	0	0	0	0	0	0	0	0.15	0	0	0.08	0	0	0.12	0	0.09	0.07	0.39	0.29	0.34	0	0.11	0.15	0.2	0.1	0	0	0	0
GCA_000450705.2_Clostridioides_difficile_DA00313_Contig_ST2	ST2		0.9	0.99	0.67	0.97	0.99	0.55	0.07	0	0.13	0.25	0.68	0.58	0.74	0.3	0.37	0	0	0.1	0	0	0	0	0	0	0	0.15	0	0	0.08	0	0	0.12	0	0.09	0.07	0.39	0.29	0.34	0	0.11	0.15	0.2	0.1	0	0	0	0
GCA_000450845.2_Clostridioides_difficile_Y21_Contig_ST2	ST2		0.9	0.99	0.99	0.97	0.99	0.55	0.07	0	0.13	0.24	0.68	0.58	0.74	0.3	0.37	0	0	0.1	0	0	0	0	0	0	0	0.15	0	0	0.08	0	0	0.12	0	0.09	0.07	0.39	0.29	0.34	0	0.11	0.15	0.2	0.1	0	0	0	0
GCA_000450905.2_Clostridioides_difficile_Y401_Contig_ST2	ST2		0.9	0.99	0.99	0.97	0.99	0.19	0.06	0	0.13	0.24	0.68	0.58	0.74	0.3	0.38	0	0	0.1	0	0	0	0	0	0	0	0.15	0	0	0.08	0	0	0.12	0	0.09	0.04	0.39	0.29	0.34	0	0.11	0.15	0.2	0.1	0	0	0	0
GCA_000451205.2_Clostridioides_difficile_CD90_Contig_ST2	ST2		0.9	0.99	0.99	0.97	0.99	0.55	0.07	0	0.13	0.25	0.68	0.58	0.74	0.3	0.37	0	0	0.1	0	0	0	0	0	0	0	0.15	0	0	0.08	0	0	0.12	0	0.09	0.07	0.39	0.29	0.34	0	0	0.15	0.2	0.1	0	0	0	0
GCA_000451565.2_Clostridioides_difficile_P3_Contig_ST2	ST2		0.9	0.99	0.99	0.97	0.99	0.21	0.07	0	0.13	0.18	0.68	0.58	0.74	0.3	0.37	0	0	0.1	0	0	0	0	0	0	0	0.15	0	0	0.08	0	0	0.12	0	0.09	0.07	0.39	0.29	0.34	0	0.11	0.15	0.2	0.1	0	0	0	0
GCA_000452045.2_Clostridioides_difficile_P78_Contig_ST2	ST2		0.9	0.99	0.99	0.97	0.99	0.55	0.07	0	0.13	0.25	0.68	0.58	0.74	0.3	0.38	0	0	0.1	0	0	0	0	0	0	0	0.15	0	0	0.08	0	0	0.12	0	0.09	0.07	0.39	0.29	0.34	0	0.11	0.15	0.2	0.1	0	0	0	0
GCA_000452205.2_Clostridioides_difficile_P77_Contig_ST2	ST2		0.9	0.99	0.99	0.97	0.99	0.55	0.07	0	0.13	0.24	0.68	0.58	0.74	0.3	0.37	0	0	0.1	0	0	0	0	0	0	0	0.15	0	0	0.08	0	0	0.12	0	0.09	0.07	0.39	0.29	0.34	0	0.11	0.15	0.2	0.1	0	0	0	0
GCA_000473565.2_Clostridioides_difficile_DA00130_Contig_ST2	ST2		0.9	0.99	0.99	0.97	0.99	0.21	0.07	0	0.13	0.25	0.68	0.58	0.74	0.3	0.37	0	0	0.1	0	0	0	0	0	0	0	0.15	0	0	0.08	0	0	0.12	0	0.09	0.07	0.39	0.29	0.34	0	0.11	0.15	0.2	0.1	0	0	0	0
GCA_000473585.2_Clostridioides_difficile_P33_Contig_ST2	ST2		0.9	0.99	0.99	0.97	0.99	0.18	0.07	0	0.13	0.24	0.68	0.58	0.74	0.3	0.37	0	0	0.1	0	0	0	0	0	0	0	0.15	0	0	0.08	0	0	0.12	0	0.09	0.07	0.39	0.29	0.34	0	0.11	0.15	0.2	0.1	0	0	0	0
GCA_001577795.1_Clostridioides_difficile_08ACD0030_Complete_Genome_ST2	ST2		0.9	0.99	0.99	0.97	0.99	0.18	0.07	0	0.13	0.25	0.68	0.58	0.74	0.3	0.38	0	0	0.1	0	0	0	0	0	0	0	0.15	0	0	0.08	0	0	0.12	0	0.09	0.07	0.39	0.29	0.34	0	0.11	0.15	0.19	0.1	0	0	0	0
GCA_001939005.1_Clostridioides_difficile_01A09CD0020_Contig_ST2	ST2		0.9	0.99	0.99	0.97	0.99	0.55	0.07	0	0.13	0.25	0.68	0.58	0.74	0.3	0.37	0	0	0.1	0	0	0	0	0	0	0	0.15	0	0	0.08	0	0	0.12	0	0.09	0.07	0.39	0.29	0.34	0	0.11	0.15	0.2	0.1	0	0	0	0
GCA_001971985.1_Clostridioides_difficile_20111144_Contig_ST2	ST2		0.9	0.99	0.99	0.97	0.99	0.55	0.07	0	0.13	0.25	0.68	0.58	0.74	0.3	0.38	0	0	0.1	0	0	0	0	0	0	0	0.15	0	0	0.08	0	0	0.12	0	0.09	0.07	0.39	0.29	0.34	0	0.11	0.15	0.19	0.1	0	0	0	0
GCA_001972135.1_Clostridioides_difficile_20120956_Contig_ST2	ST2		0.9	0.99	0.99	0.97	0.99	0.21	0.07	0	0.13	0.25	0.68	0.58	0.74	0.3	0.37	0	0	0.1	0	0	0	0	0	0	0	0.15	0	0	0.08	0	0	0.12	0	0.09	0.07	0.39	0.29	0.34	0	0.11	0.15	0.2	0.1	0	0	0	0
GCA_002300995.1_Clostridioides_difficile_5485-Y-ST2_Contig_ST2	ST2		0.9	0.99	0.99	0.97	0.99	0.11	0.07	0	0.13	0.25	0.68	0.58	0.74	0.3	0.37	0	0	0.1	0	0	0	0	0	0	0	0.15	0	0	0.08	0	0	0.12	0	0.08	0.07	0.39	0.29	0.34	0	0.11	0.15	0.2	0.1	0	0	0	0
GCA_002301015.1_Clostridioides_difficile_5486-Y-ST2_Contig_ST2	ST2		0.9	0.99	0.99	0.97	0.99	0.18	0.07	0	0.13	0.25	0.68	0.58	0.74	0.3	0.37	0	0	0.1	0	0	0	0	0	0	0	0.15	0	0	0.08	0	0	0.12	0	0.09	0.07	0.39	0.29	0.34	0	0.11	0.15	0.2	0.1	0	0	0	0
GCA_002301265.1_Clostridioides_difficile_5503-Y-ST2_Contig_ST2	ST2		0.9	0.99	0.99	0.97	0.99	0.55	0.07	0	0.13	0.25	0.68	0.58	0.74	0.3	0.37	0	0	0.1	0	0	0	0	0	0	0	0.15	0	0	0.08	0	0	0.12	0	0.09	0.07	0.39	0.29	0.34	0	0.11	0.15	0.2	0.1	0	0	0	0
GCA_002301395.1_Clostridioides_difficile_5505-Y-ST2_Contig_ST2	ST2		0.9	0.99	0.99	0.97	0.99	0.55	0.07	0	0.13	0.25	0.68	0.58	0.74	0.3	0.38	0	0	0.1	0	0	0	0	0	0	0	0.15	0	0	0.08	0	0	0.12	0	0.09	0.07	0.39	0.29	0.34	0	0.11	0.15	0.19	0.1	0	0	0	0
GCA_002301455.1_Clostridioides_difficile_5542-Y-ST2_Contig_ST2	ST2		0.9	0.99	0.99	0.97	0.99	0.13	0.07	0	0.13	0.25	0.68	0.58	0.74	0.3	0.37	0	0	0.1	0	0	0	0	0	0.1	0	0.15	0	0	0.08	0	0	0.12	0	0.09	0.07	0.39	0.29	0.34	0	0.11	0.15	0.2	0.1	0	0	0	0
GCA_002301495.1_Clostridioides_difficile_5548-Y-ST2_Contig_ST2	ST2		0.9	0.99	0.99	0.97	0.99	0.55	0.07	0	0	0.25	0.68	0.58	0.74	0.3	0.38	0	0	0.1	0	0	0	0	0	0	0	0.15	0	0	0.08	0	0	0.12	0	0.09	0.07	0.39	0.29	0.34	0	0.11	0.15	0.2	0.1	0	0	0	0
GCA_002301705.1_Clostridioides_difficile_5539-Y-ST2_Contig_ST2	ST2		0.9	0.99	0.99	0.97	0.99	0.13	0.07	0	0.13	0.25	0.68	0.58	0.74	0.3	0.37	0	0	0.1	0	0	0	0	0	0	0	0.15	0	0	0.08	0	0	0.12	0	0.09	0.07	0.39	0.29	0.34	0	0.11	0.15	0.2	0.1	0	0	0	0
GCA_002302055.1_Clostridioides_difficile_7451-NonSp-ST2_Contig_ST2	ST2		0.9	0.99	0.99	0.97	0.99	0.18	0.07	0	0.13	0.25	0.68	0.58	0.74	0.3	0.37	0	0	0.1	0	0	0	0	0	0	0	0.15	0	0	0.08	0	0	0.12	0	0.09	0.07	0.39	0.29	0.34	0	0.11	0.15	0.2	0.1	0	0	0	0
GCA_002302075.1_Clostridioides_difficile_7453-Y-ST2_Contig_ST2	ST2		0.9	0.99	0.99	0.97	0.99	0.21	0.07	0	0.13	0.25	0.68	0.58	0.74	0.3	0.37	0	0	0.1	0	0	0	0	0	0	0	0.15	0	0	0.08	0	0	0.12	0	0.09	0.07	0.39	0.29	0.34	0	0.11	0.15	0.2	0.1	0	0	0	0
GCA_002302805.1_Clostridioides_difficile_7476-Y-ST2_Contig_ST2	ST2		0.9	0.99	0.99	0.97	0.99	0.12	0.07	0	0.13	0.25	0.68	0.58	0.74	0.3	0.37	0	0	0.1	0	0	0	0	0	0	0	0.15	0	0	0.08	0	0	0.12	0	0.09	0.07	0.39	0.29	0.34	0	0.11	0.15	0.2	0.1	0	0	0	0.05
GCA_002303215.1_Clostridioides_difficile_7505-Y-ST2_Contig_ST2	ST2		0.9	0.99	0.99	0.97	0.99	0.18	0.07	0	0.13	0.25	0.68	0.58	0.74	0.3	0.37	0	0	0.1	0	0	0	0	0	0	0	0.15	0	0	0.08	0	0	0.12	0	0.09	0.07	0.39	0.29	0.34	0	0.11	0.15	0.2	0.1	0	0	0	0
GCA_002303225.1_Clostridioides_difficile_6603-Y-ST2_Contig_ST2	ST2		0.37	0.88	0.99	0.97	0.99	0.18	0.07	0	0.13	0.25	0.68	0.58	0.74	0.3	0.37	0	0	0.1	0	0	0	0	0	0.1	0	0.15	0	0	0.08	0	0	0.12	0	0.09	0.07	0.39	0.29	0.34	0	0.11	0.15	0.2	0.1	0	0	0	0
GCA_002303605.1_Clostridioides_difficile_6625-Y-ST2_Contig_ST2	ST2		0.9	0.99	0.99	0.97	0.99	0.55	0.07	0	0.13	0.25	0.68	0.58	0.74	0.3	0.37	0	0	0.1	0	0	0	0	0	0	0	0.15	0	0	0.08	0	0	0.12	0	0.09	0.07	0.39	0.29	0.34	0	0.11	0.15	0.2	0.1	0	0	0	0
GCA_900007605.1_Clostridioides_difficile_VL_0047_Contig_ST2	ST2		0.9	0.99	0.99	0.97	0.99	0.55	0.07	0	0.13	0.25	0.68	0.58	0.74	0.3	0.37	0	0	0.1	0	0	0	0	0	0	0	0.15	0	0	0.08	0	0	0.12	0	0.09	0.07	0.39	0.29	0.34	0	0.11	0.15	0.19	0.1	0	0	0	0
GCA_900008335.1_Clostridioides_difficile_VL_0028_Contig_ST2	ST2		0.9	0.99	0.99	0.97	0.99	0.55	0.07	0	0.13	0.24	0.68	0.58	0.74	0.3	0.37	0	0	0.1	0	0	0	0	0	0	0	0.15	0	0	0.08	0	0	0.12	0	0.09	0.07	0.39	0.29	0.34	0	0.11	0.15	0.2	0.1	0	0	0	0
GCA_900008565.1_Clostridioides_difficile_VL_0342_Contig_ST2	ST2		0.9	0.99	0.99	0.97	0.99	0.55	0.07	0	0.13	0.24	0.68	0.58	0.74	0.3	0.38	0	0	0.1	0	0	0	0	0	0	0	0.15	0	0	0.08	0	0	0.12	0	0.09	0.07	0.39	0.29	0.34	0	0.11	0.15	0.19	0.1	0	0	0	0
GCA_900010345.1_Clostridioides_difficile_VL_0140_Contig_ST2	ST2		0.9	0.99	0.99	0.97	0.99	0.55	0.07	0	0.13	0.25	0.68	0.58	0.74	0.3	0.37	0	0	0.1	0	0	0	0	0	0	0	0.15	0	0	0.08	0	0	0.12	0	0.09	0.07	0.39	0.29	0.34	0	0.11	0.15	0.2	0.1	0	0	0	0
GCA_900010855.1_Clostridioides_difficile_VL_0029_Contig_ST2	ST2		0.9	0.99	0.99	0.97	0.99	0.55	0.07	0	0.13	0.25	0.68	0.58	0.74	0.3	0.37	0	0	0.1	0	0	0	0	0	0	0	0.15	0	0	0.08	0	0	0.12	0	0.09	0.07	0.39	0.29	0.34	0	0.11	0.15	0.2	0.1	0	0	0	0
GCA_900011095.1_Clostridioides_difficile_VL_0175_Contig_ST2	ST2		0.9	0.99	0.7	0.97	0.99	0.21	0.07	0	0.13	0.24	0.68	0.58	0.74	0.3	0.37	0	0	0.1	0	0	0	0	0	0	0	0.15	0	0	0.08	0	0	0.12	0	0.09	0.07	0.39	0.29	0.34	0	0.11	0.15	0.2	0.1	0	0	0	0
GCA_900011805.1_Clostridioides_difficile_VL_0031_Contig_ST2	ST2		0.9	0.99	0.99	0.97	0.99	0.21	0.07	0	0.13	0.24	0.68	0.58	0.74	0.3	0.37	0	0	0.1	0	0	0	0	0	0	0	0.15	0	0	0.08	0	0	0.12	0	0.09	0.07	0.39	0.29	0.34	0	0.11	0.15	0.2	0.1	0	0	0	0
GCA_900011835.1_Clostridioides_difficile_VL_0064_Contig_ST2	ST2		0.9	0.99	0.99	0.97	0.99	0.55	0.07	0	0.13	0.25	0.68	0.58	0.74	0.3	0.37	0	0	0.1	0	0	0	0	0	0	0	0.15	0	0	0.08	0	0	0.12	0	0.09	0.07	0.39	0.29	0.34	0	0	0.15	0.2	0.1	0	0	0	0
GCA_900011845.1_Clostridioides_difficile_VL_0065_Contig_ST2	ST2		0.9	0.99	0.99	0.97	0.99	0.55	0.07	0	0.13	0.25	0.68	0.58	0.74	0.3	0.37	0	0	0.1	0	0	0	0	0	0	0	0.15	0	0	0.08	0	0	0.12	0	0.09	0.07	0.39	0.29	0.34	0	0.11	0.15	0.2	0.1	0	0	0	0
GCA_900011995.1_Clostridioides_difficile_VL_0100_Contig_ST2	ST2		0.9	0.99	0.99	0.97	0.99	0.18	0.07	0	0.13	0.25	0.68	0.58	0.74	0.3	0.37	0	0	0.1	0	0	0	0	0	0	0	0.15	0	0	0.08	0	0	0.12	0	0.09	0.07	0.39	0.29	0.34	0	0.11	0.15	0.2	0.1	0	0	0	0
GCA_900012255.1_Clostridioides_difficile_VL_0159_Contig_ST2	ST2		0.9	0.99	0.99	0.97	0.99	0.55	0.07	0	0.13	0.25	0.68	0.58	0.74	0.3	0.37	0	0	0.1	0	0	0	0	0	0	0	0.15	0	0	0.08	0	0	0.12	0	0.09	0.07	0.39	0.29	0.34	0	0.11	0.15	0.2	0.1	0	0	0	0
GCA_900013125.1_Clostridioides_difficile_VL_0233_Contig_ST2	ST2		0.9	0.99	0.99	0.97	0.99	0.55	0.07	0	0.13	0.24	0.68	0.58	0.74	0.3	0.37	0	0	0.1	0	0	0	0	0	0	0	0.15	0	0	0.08	0	0	0.12	0	0.09	0.07	0.39	0.29	0.34	0	0.11	0.15	0.2	0.1	0	0	0	0
GCA_900013695.1_Clostridioides_difficile_VL_0252_Contig_ST2	ST2		0.9	0.99	0.99	0.97	0.99	0.55	0.07	0	0.13	0.25	0.68	0.58	0.74	0.3	0.37	0	0	0.1	0	0	0	0	0	0	0	0.15	0	0	0.08	0	0	0.12	0	0.09	0.07	0.39	0.31	0.34	0	0.11	0.15	0.2	0.1	0	0	0	0
GCA_900013865.1_Clostridioides_difficile_VL_0288_Contig_ST2	ST2		0.9	0.99	0.99	0.97	0.99	0.55	0.07	0	0.13	0.25	0.68	0.58	0.74	0.3	0.37	0	0	0.1	0	0	0	0	0	0	0	0.15	0	0	0.08	0	0	0.12	0	0.09	0.07	0.39	0.29	0.34	0	0.11	0.15	0.2	0.1	0	0	0	0
GCA_900013925.1_Clostridioides_difficile_VL_0309_Contig_ST2	ST2		0.9	0.99	0.84	0.97	0.69	0.55	0.07	0	0.13	0.24	0.68	0.58	0.74	0.3	0.37	0	0	0.1	0	0	0	0	0	0	0	0.15	0	0	0.08	0	0	0.12	0	0.09	0.07	0.39	0.29	0.34	0	0.11	0.15	0.2	0.1	0	0	0	0
GCA_900013965.1_Clostridioides_difficile_VL_0320_Contig_ST2	ST2		0.9	0.99	0.99	0.97	0.99	0.18	0.3	0	0.13	0.25	0.68	0.58	0.74	0.3	0.38	0	0	0.1	0	0	0	0	0	0.44	0	0.15	0	0	0.08	0	0	0.12	0	0.27	0.74	0.39	0.87	0.34	0	0.11	0.15	0.2	0.1	0	0	0	0.05
GCA_900014185.1_Clostridioides_difficile_VL_0372_Contig_ST2	ST2		0.9	0.99	0.99	0.97	0.99	0.24	0.07	0	0.13	0.24	0.68	0.58	0.74	0.3	0.37	0	0	0.1	0	0	0	0	0	0	0	0.15	0	0	0.08	0	0	0.12	0	0.09	0.07	0.39	0.29	0.34	0	0.11	0.15	0.2	0.1	0	0	0	0
GCA_900014465.1_Clostridioides_difficile_VL_0366_Contig_ST2	ST2		0.9	0.99	0.99	0.97	0.99	0.55	0.07	0	0.13	0.25	0.68	0.58	0.74	0.3	0.37	0	0	0.1	0	0	0	0	0	0	0	0.15	0	0	0.08	0	0	0.12	0	0.09	0.07	0.39	0.29	0.34	0	0.11	0.15	0.2	0.1	0	0	0	0
GCA_900014475.1_Clostridioides_difficile_VL_0377_Contig_ST2	ST2		0.9	0.99	0.99	0.97	0.99	0.55	0.07	0	0.13	0.24	0.68	0.58	0.74	0.3	0.37	0	0	0.1	0	0	0	0	0	0	0	0.15	0	0	0.08	0	0	0.12	0	0.09	0.07	0.39	0.29	0.34	0	0.11	0.15	0.2	0.1	0	0	0	0
GCA_900014575.1_Clostridioides_difficile_VL_0399_Contig_ST2	ST2		0.9	0.99	0.99	0.97	0.99	0.55	0.07	0	0.13	0.25	0.68	0.58	0.74	0.3	0.38	0	0	0.1	0	0	0	0	0	0	0	0.15	0	0	0.08	0	0	0.12	0	0.09	0.07	0.39	0.29	0.34	0	0.11	0.15	0.2	0.1	0	0	0	0
GCA_900014785.1_Clostridioides_difficile_VL_0463_Contig_ST2	ST2		0.9	0.99	0.99	0.97	0.99	0.55	0.07	0	0.13	0.24	0.68	0.58	0.74	0.3	0.37	0	0	0.1	0	0	0	0	0	0	0	0.15	0	0	0.08	0	0	0.12	0	0.09	0.07	0.39	0.29	0.34	0	0.11	0.15	0.2	0.1	0	0	0	0
GCA_900014855.1_Clostridioides_difficile_VL_0038_Contig_ST2	ST2		0.9	0.99	0.99	0.97	0.99	0.55	0.07	0	0.13	0.25	0.68	0.58	0.74	0.3	0.37	0	0	0.1	0	0	0	0	0	0	0	0.15	0	0	0.08	0	0	0.12	0	0.09	0.07	0.39	0.29	0.34	0	0.11	0.15	0.2	0.1	0	0	0	0
GCA_900015095.1_Clostridioides_difficile_VL_0041_Contig_ST2	ST2		0.9	0.99	0.99	0.97	0.99	0.55	0.07	0	0.13	0.25	0.68	0.58	0.74	0.3	0.38	0	0	0.1	0	0	0	0	0	0	0	0.15	0	0	0.08	0	0	0.12	0	0.09	0.07	0.39	0.29	0.34	0	0.11	0.15	0.2	0.1	0	0	0	0
GCA_900015225.1_Clostridioides_difficile_VL_0098_Contig_ST2	ST2		0.9	0.99	0.99	0.97	0.99	0.55	0.07	0	0.13	0.24	0.68	0.58	0.74	0.3	0.37	0	0	0.1	0	0	0	0	0	0	0	0.15	0	0	0.08	0	0	0.12	0	0.09	0.07	0.39	0.29	0.34	0	0.11	0.15	0.2	0.1	0	0	0	0
GCA_900015275.1_Clostridioides_difficile_VL_0332_Contig_ST2	ST2		0.9	0.99	0.99	0.97	0.99	0.18	0.07	0	0.13	0.24	0.68	0.58	0.74	0.3	0.37	0	0	0.1	0	0	0	0	0	0	0	0.15	0	0	0.08	0	0	0.12	0	0.09	0.07	0.39	0.29	0.34	0	0.11	0.15	0.2	0.1	0	0	0	0
GCA_900015625.1_Clostridioides_difficile_VL_0195_Contig_ST2	ST2		0.9	0.99	0.99	0.97	0.99	0.55	0.07	0	0.13	0.25	0.68	0.58	0.74	0.3	0.37	0	0	0.1	0	0	0	0	0	0	0	0.15	0	0	0.08	0	0	0.12	0	0.09	0.07	0.39	0.29	0.34	0	0.11	0.15	0.2	0.1	0	0	0	0
GCA_900015665.1_Clostridioides_difficile_VL_0367_Contig_ST2	ST2		0.9	0.99	0.99	0.97	0.99	0.55	0.07	0	0.13	0.24	0.68	0.58	0.74	0.3	0.37	0	0	0.1	0	0	0	0	0	0	0	0.15	0	0	0.08	0	0	0.12	0	0.09	0.07	0.39	0.29	0.34	0	0.11	0.15	0.2	0.1	0	0	0	0
GCA_900015675.1_Clostridioides_difficile_VL_0426_Contig_ST2	ST2		0.9	0.99	0.99	0.97	0.99	0.55	0.07	0	0.13	0.25	0.68	0.58	0.74	0.3	0.37	0	0	0.1	0	0	0	0	0	0	0	0.15	0	0	0.08	0	0	0.12	0	0.09	0.07	0.39	0.29	0.34	0	0.11	0.15	0.2	0.1	0	0	0	0
GCA_900016315.1_Clostridioides_difficile_VL_0310_Contig_ST2	ST2		0.9	0.99	0.99	0.97	0.99	0.44	0.07	0	0.13	0.24	0.68	0.58	0.74	0.3	0.37	0	0	0.1	0	0	0	0	0	0	0	0.15	0	0	0.08	0	0	0.12	0	0.09	0.07	0.39	0.29	0.34	0	0.11	0.15	0.2	0.1	0	0	0	0
GCA_900165795.1_Clostridioides_difficile_VRECD0093_Contig_ST2	ST2		0.9	0.99	0.99	0.97	0.99	0.21	0.07	0	0.13	0.24	0.68	0.58	0.74	0.3	0.38	0	0	0.1	0	0	0	0	0	0	0	0.15	0	0	0.08	0	0	0.12	0	0.09	0.07	0.39	0.29	0.34	0	0.11	0.15	0.2	0.1	0	0	0	0
GCA_900008605.1_Clostridioides_difficile_VL_0391_Contig_ST201	ST201		0.69	0.99	0.99	0.99	0.99	0.36	0.26	0.4	0	0.24	0.34	0.2	0.38	0.11	0.11	0	0	0.1	0	0	0	0	0	0	0	0.15	0	0.29	0.09	0	0.05	0.12	0	0.3	0.3	0.4	0.29	0.34	0	0.37	0.14	0.19	0.1	0	0	0	0.04
GCA_900014225.1_Clostridioides_difficile_VL_0104_Contig_ST201	ST201		0.69	0.99	0.99	0.99	0.99	0.36	0.26	0.4	0	0.24	0.35	0.2	0.38	0.11	0.11	0	0	0.1	0	0	0	0	0	0	0	0.15	0	0.29	0.09	0	0.05	0.12	0	0.3	0.3	0.4	0.29	0.34	0	0.37	0.15	0.19	0.1	0	0	0	0.04
GCA_002301505.1_Clostridioides_difficile_5549-NonSp-ST21_Contig_ST21	ST21		0.9	0.98	0.99	0.97	0.99	0.36	0.36	0.45	0	0.26	0.68	0.58	0.74	0.3	0.38	0	0.12	0.1	0	0	0.27	0	0	0	0	0.15	0	0.36	0.08	0	0	0.12	0.21	0.31	0.3	0.39	0.29	0.34	0	0.36	0.15	0.2	0.1	0	0	0	0.14
GCA_900011875.1_Clostridioides_difficile_VL_0076_Contig_ST21	ST21		0.9	0.98	0.99	0.97	0.99	0.36	0.1	0	0	0.25	0.68	0.58	0.74	0.3	0.38	0	0	0.1	0	0	0	0	0	0	0	0.15	0	0	0.08	0	0	0.12	0.21	0.11	0.12	0.31	0.29	0.34	0	0	0.15	0.19	0.1	0	0	0	0
GCA_900014285.1_Clostridioides_difficile_VL_0225_Contig_ST21	ST21		0.9	0.98	0.99	0.97	0.99	0.36	0.1	0	0	0.25	0.68	0.58	0.74	0.3	0.38	0	0	0.1	0	0	0	0	0	0	0	0.15	0	0	0.08	0	0	0.12	0.21	0.11	0.12	0.31	0.29	0.34	0	0	0.15	0.19	0.1	0	0	0	0
GCA_000449185.2_Clostridioides_difficile_CD69_Contig_ST221	ST221		0.69	0.99	0.99	0.99	0.99	0.36	0.34	0	0	0.28	0.35	0.2	0.38	0.11	0.11	0	0	0.1	0	0	0	0	0	0	0	0.15	0	0	0.08	0	0	0.12	0	0.31	0.4	0.4	0.29	0.34	0	0.11	0.15	0.19	0.1	0	0	0	0.04
GCA_001704755.1_Clostridioides_difficile_106_Contig_ST221	ST221		0.69	0.99	0.99	0.99	0.99	0.36	0.35	0	0	0.28	0.34	0.19	0.38	0.11	0.11	0	0	0.1	0	0	0	0	0	0	0	0.15	0	0	0.08	0	0	0.12	0	0.31	0.4	0.5	0.29	0.34	0	0	0.15	0.19	0.1	0	0	0	0.04
GCA_002300855.1_Clostridioides_difficile_5479-NonSp-ST229_Contig_ST229	ST229		0.36	0.99	1	1	1	0.48	0.07	0	0	0.14	0.68	0.58	0.74	0.3	0.38	0	0	0.1	0	0.18	0	0	0	0	0	0.14	0	0	0.08	0	0	0.12	0.21	0.09	0.07	0.39	0.29	0.35	0	0	0.15	0.19	0.1	0	0	0	0.05
GCA_900014025.1_Clostridioides_difficile_VL_0328_Contig_ST231	ST231		0.93	0.99	1	1	1	0.6	0.27	0	0	0.15	0.67	0.59	0.63	0.3	0.38	0	0	0.1	0	0.15	0.04	0	0	0	0	0.15	0	0	0.09	0	0	0.12	0	0.31	0.3	0.38	0.29	0.34	0	0	0.15	0.19	0.1	0	0	0	0.04
GCA_900013635.1_Clostridioides_difficile_VL_0243_Contig_ST236	ST236		0.36	0.07	0.15	0	0.18	0.99	0.1	0	0.13	0.14	0.68	0.58	0.74	0.3	0.38	0	0	0.1	0	0	0	0	0	0	0	0.15	0	0	0.08	0	0	0.12	0.21	0.11	0.12	0.31	0.29	0.34	0	0	0.15	0.19	0.1	0	0	0	0
GCA_000451765.1_Clostridioides_difficile_P30_Contig_ST26	ST26		0.88	0.99	0.99	0.97	0.99	0.6	0.26	0	0.13	0.26	0.88	0.87	0.95	0.3	0.38	0.44	0	0.1	0	0	0.06	0	0	0.42	0	0.15	0	0	0.39	0	0	0.12	0	0.31	0.31	0.44	0.29	0.34	0.99	0	0.15	0.19	0.45	0.2	0	0	0
GCA_000451865.2_Clostridioides_difficile_P42_Contig_ST26	ST26		0.88	0.99	0.99	0.97	0.99	0.55	0.31	0.42	0.13	0.26	0.88	0.87	0.95	0.3	0.38	0.44	0	0.1	0	0	0.06	0	0	0.42	0	0.15	0	0.4	0.39	0	0	0.12	0	0.31	0.32	0.44	0.29	0.34	0.99	0.36	0.15	0.19	0.45	0.2	0	0	0
GCA_000821005.1_Clostridioides_difficile_CII7xCD13A_Contig_ST26	ST26		0.88	0.99	0.99	0.97	0.99	0.55	0.26	0	0.13	0.26	0.88	0.87	0.95	0.3	0.38	0.44	0	0.1	0	0.25	0.31	0	0	0.42	0.11	0.31	0	0	0.39	0	0	0.12	0	0.38	0.31	0.44	0.29	0.34	0.99	0	0.15	0.19	0.45	0.2	0.29	0	0.24
GCA_002301735.1_Clostridioides_difficile_6584-AQ-ST26_Contig_ST26	ST26		0.89	0.99	0.99	0.97	0.99	0.55	0.7	0.35	0.13	0.26	0.88	0.87	0.95	0.3	0.38	0.44	0	0.1	0	0	0.06	0	0	0.42	0	0.15	0	0.38	0.39	0	0.49	0.45	0	0.31	0.33	0.44	0.29	0.34	0.99	0.37	0.15	0.19	0.45	0.2	0	0	0
GCA_900011715.1_Clostridioides_difficile_VL_0419_Contig_ST26	ST26		0.88	0.99	0.99	0.97	0.99	0.4	0.26	0	0.13	0.26	0.88	0.87	0.95	0.3	0.38	0.44	0	0.1	0	0	0.06	0	0	0.42	0	0.15	0	0	0.39	0	0	0.12	0	0.31	0.31	0.44	0.29	0.34	0.99	0	0.15	0.19	0.45	0.2	0	0	0
GCA_900012225.1_Clostridioides_difficile_VL_0152_Contig_ST26	ST26		0.88	0.99	0.99	0.97	0.99	0.4	0.26	0	0.13	0.26	0.88	0.87	0.95	0.3	0.38	0.44	0	0.1	0	0	0.06	0	0	0.42	0	0.15	0	0	0.39	0	0	0.12	0	0.31	0.31	0.44	0.29	0.34	0.99	0	0.15	0.19	0.45	0.2	0	0	0
GCA_900013755.1_Clostridioides_difficile_VL_0261_Contig_ST26	ST26		0.88	0.99	0.99	0.97	0.99	0.4	0.26	0	0.13	0.26	0.88	0.87	0.95	0.3	0.38	0.44	0	0.1	0	0	0.06	0	0	0.42	0	0.15	0	0	0.39	0	0	0.12	0	0.31	0.31	0.44	0.29	0.34	0.99	0	0.15	0.19	0.45	0.2	0	0	0
GCA_900164115.1_Clostridioides_difficile_VRECD0142_Contig_ST26	ST26		0.88	0.99	0.99	0.97	0.99	0.55	0.31	0.42	0.13	0.27	0.88	0.87	0.95	0.3	0.38	0.44	0	0.1	0	0	0.06	0	0	0.42	0	0.15	0	0.4	0.39	0	0	0.12	0	0.31	0.32	0.44	0.29	0.34	0.99	0.36	0.15	0.19	0.45	0.2	0	0	0
GCA_900014625.1_Clostridioides_difficile_VL_0406_Contig_ST27	ST27		0.88	0.07	0.15	0	0.18	0.4	0.26	0	0.13	0.26	0.88	0.87	0.95	0.3	0.38	0.44	0	0.1	0	0	0.06	0	0	0.42	0	0.15	0	0	0.39	0	0	0.12	0.19	0.27	0.31	0.44	0.29	0.34	0	0.11	0.15	0.19	0.45	0.2	0	0	0
GCA_002303245.1_Clostridioides_difficile_6612-DH-ST28_Contig_ST28	ST28		0.9	0.98	0.99	0.97	0.99	0.12	0.07	0	0.13	0.15	0.68	0.58	0.74	0.3	0.38	0	0	0.1	0	0	0	0	0	0	0	0.15	0	0	0.08	0	0	0.12	0	0.09	0.07	0.39	0.29	0.34	0	0	0.15	0.2	0.1	0	0	0	0
GCA_000451825.1_Clostridioides_difficile_P38_Contig_ST29	ST29		0.87	0.98	0.99	0.97	0.99	0.13	0.07	0	0.13	0.28	0.88	0.87	0.93	0.39	0.42	0	0	0.1	0	0	0.05	0	0	0.44	0	0.15	0	0	0.08	0	0	0.12	0	0.09	0.09	0.44	0.29	0.34	0	0.11	0.15	0.19	0.1	0	0	0	0
GCA_001757615.1_Clostridioides_difficile_H3_Contig_ST29	ST29		0.87	0.98	0.99	0.97	0.99	0.45	0.07	0	0.13	0.28	0.88	0.87	0.93	0.39	0.42	0	0	0.1	0	0	0.05	0	0	0.44	0	0.15	0	0	0.08	0	0	0.12	0	0.09	0.09	0.36	0.29	0.34	0	0.11	0.15	0.19	0.1	0	0	0	0.05
GCA_000242355.2_Clostridioides_difficile_CD37_Contig_ST3	ST3		0.88	0.07	0.15	0	0.18	0.61	0.06	0	0	0.28	0.88	0.87	0.93	0.39	0.42	0	0	0.1	0	0	0	0	0	0.43	0	0.15	0	0	0.08	0	0	0.12	0.21	0.09	0.05	0.4	0.29	0.34	0	0.11	0.15	0.19	0.1	0	0	0	0
GCA_000448965.2_Clostridioides_difficile_CD40_Contig_ST3	ST3		0.36	0.99	0.99	0.97	0.98	0.19	0.26	0	0.13	0.24	0.68	0.58	0.74	0.3	0.38	0	0	0.28	0.3	0	0	0	0	0.19	0	0.15	0	0	0.09	0	0	0.12	0	0.25	0.29	0.39	0.25	0.34	0.93	0.11	0.22	0.2	0.1	0	0	0	0
GCA_000449105.2_Clostridioides_difficile_CD47_Contig_ST3	ST3		0.36	0.99	0.99	0.97	0.63	0.19	0.07	0	0.13	0.14	0.56	0.58	0.74	0.3	0.38	0	0	0.1	0	0.18	0	0	0	0	0	0.15	0	0	0.09	0	0	0.12	0	0.09	0.07	0.36	0.29	0.34	0.93	0.11	0.15	0.2	0.1	0	0	0	0
GCA_000449265.2_Clostridioides_difficile_DA00273_Contig_ST3	ST3		0.36	0.99	0.99	0.97	0.98	0.19	0.07	0	0.13	0.14	0.68	0.58	0.74	0.3	0.38	0	0	0.1	0	0	0	0	0	0	0	0.15	0	0	0.09	0	0	0.12	0	0.09	0.07	0.36	0.29	0.33	0.93	0.11	0.15	0.2	0.1	0	0	0	0
GCA_000449485.2_Clostridioides_difficile_CD169_Contig_ST3	ST3		0.88	0.07	0.15	0	0.18	0.61	0.06	0	0	0.28	0.88	0.87	0.93	0.39	0.42	0	0	0.1	0	0	0	0	0	0.44	0	0.15	0	0	0.08	0	0	0.12	0.21	0.09	0.05	0.4	0.29	0.34	0	0.11	0.15	0.19	0.1	0	0	0	0.05
GCA_000449545.2_Clostridioides_difficile_CD178_Contig_ST3	ST3		0.88	0.07	0.15	0	0.18	0.61	0.06	0	0	0.27	0.88	0.87	0.93	0.39	0.42	0	0	0.1	0	0	0.05	0	0	0.44	0	0.15	0	0	0.08	0	0	0.12	0.21	0.09	0.05	0.4	0.29	0.34	0	0.11	0.15	0.19	0.1	0	0	0	0
GCA_000449585.2_Clostridioides_difficile_CD181_Contig_ST3	ST3		0.36	0.99	0.99	0.97	0.98	0.19	0.36	0.45	0.13	0.25	0.68	0.58	0.74	0.3	0.38	0	0	0.28	0.3	0	0.27	0	0	0.19	0	0.15	0	0.3	0.09	0	0	0.12	0	0.26	0.29	0.39	0.29	0.34	0.93	0.34	0.22	0.2	0.11	0.22	0	0	0.14
GCA_000449745.1_Clostridioides_difficile_342_Contig_ST3	ST3		0.36	0.99	0.99	0.97	0.98	0.19	0.07	0	0.13	0.14	0.68	0.58	0.74	0.3	0.38	0	0	0.1	0	0	0	0	0	0	0	0.15	0	0	0.08	0	0	0.12	0	0.09	0.07	0.39	0.29	0.34	0.93	0	0.15	0.2	0.1	0	0	0	0
GCA_000450005.2_Clostridioides_difficile_DA00128_Contig_ST3	ST3		0.36	0.99	0.99	0.97	0.98	0.2	0.07	0	0.13	0.14	0.68	0.58	0.74	0.3	0.38	0	0	0.1	0	0	0	0	0	0	0	0.15	0	0	0.08	0	0	0.12	0	0.09	0.07	0.39	0.29	0.34	0.93	0.11	0.15	0.2	0.11	0	0	0	0
GCA_000450085.2_Clostridioides_difficile_DA00134_Contig_ST3	ST3		0.88	0.07	0.15	0	0.18	0.61	0.06	0	0.26	0.28	0.95	0.96	0.99	0.99	0.99	0.94	0	0.3	0.4	0	0.05	0	0	0.44	0	0.15	0	0	0.09	0	0	0.5	0.21	0.09	0.05	0.4	0.29	0.34	0	0.11	0.15	0.19	0.1	0	0	0	0.05
GCA_000450105.2_Clostridioides_difficile_DA00141_Contig_ST3	ST3		0.88	0.07	0.15	0	0.18	0.98	0.06	0	0	0.28	0.88	0.87	0.93	0.39	0.42	0	0	0.1	0	0	0.05	0	0	0.44	0	0.15	0	0	0.08	0	0	0.12	0.21	0.09	0.05	0.4	0.29	0.34	0	0.11	0.15	0.19	0.1	0	0	0	0.05
GCA_000450245.2_Clostridioides_difficile_DA00167_Contig_ST3	ST3		0.36	0.99	0.99	0.97	0.98	0.11	0.07	0	0.13	0.23	0.68	0.58	0.74	0.3	0.38	0	0	0.1	0	0	0	0	0	0	0	0.15	0	0	0.08	0	0	0.12	0	0.09	0.07	0.4	0.29	0.34	0.93	0.11	0.15	0.2	0.1	0	0	0	0
GCA_000450485.2_Clostridioides_difficile_DA00215_Contig_ST3	ST3		0.88	0.07	0.15	0	0.18	0.61	0.06	0	0	0.28	0.88	0.87	0.93	0.39	0.42	0	0	0.1	0	0	0	0	0	0.43	0	0.15	0	0	0.08	0	0	0.12	0.21	0.09	0.05	0.4	0.29	0.34	0	0.11	0.15	0.19	0.1	0	0	0	0.04
GCA_000450545.2_Clostridioides_difficile_DA00238_Contig_ST3	ST3		0.36	0.99	0.99	0.97	0.98	0.19	0.07	0	0.13	0.14	0.68	0.58	0.74	0.3	0.38	0	0	0.1	0	0.18	0	0	0	0	0	0.15	0	0	0.09	0	0	0.12	0	0.09	0.07	0.36	0.29	0.34	0.93	0.11	0.15	0.2	0.1	0	0	0	0
GCA_000450625.2_Clostridioides_difficile_P6_Contig_ST3	ST3		0.36	0.99	0.99	0.97	0.98	0.19	0.25	0	0.13	0.25	0.68	0.58	0.74	0.3	0.38	0	0	0.28	0.3	0.18	0	0	0	0.19	0	0.15	0	0	0.08	0	0	0.12	0	0.24	0.28	0.39	0.29	0.34	0.93	0	0.22	0.2	0.1	0	0	0	0
GCA_000450665.2_Clostridioides_difficile_DA00307_Contig_ST3	ST3		0.36	0.99	0.99	0.97	0.98	0.21	0.07	0	0.13	0.14	0.68	0.58	0.74	0.3	0.38	0	0	0.1	0	0	0	0	0	0	0	0.15	0	0	0.08	0	0	0.12	0	0.09	0.07	0.36	0.29	0.34	0.93	0.11	0.15	0.2	0.1	0	0	0	0.05
GCA_000450925.2_Clostridioides_difficile_P1_Contig_ST3	ST3		0.36	0.99	0.99	0.97	0.98	0.11	0.26	0	0.13	0.25	0.68	0.58	0.74	0.3	0.38	0	0	0.28	0.3	0.18	0	0	0	0.19	0	0.15	0	0	0.08	0	0	0.12	0	0.25	0.29	0.39	0.29	0.34	0.93	0.11	0.22	0.2	0.1	0	0	0	0
GCA_000451545.2_Clostridioides_difficile_Y381_Contig_ST3	ST3		0.88	0.07	0.15	0	0.18	0.98	0.06	0	0	0.28	0.88	0.87	0.93	0.39	0.42	0	0	0.1	0	0	0	0	0	0.44	0	0.15	0	0	0.08	0	0	0.12	0.21	0.09	0.05	0.4	0.29	0.34	0	0.11	0.15	0.19	0.1	0	0	0	0.05
GCA_000452025.2_Clostridioides_difficile_P61_Contig_ST3	ST3		0.88	0.07	0.15	0	0.18	0.98	0.06	0	0	0.28	0.88	0.87	0.93	0.39	0.42	0	0	0.1	0	0	0.05	0	0	0.44	0	0.15	0	0	0.08	0	0	0.12	0.21	0.09	0.05	0.4	0.29	0.34	0	0.11	0.15	0.19	0.1	0	0	0	0
GCA_000473705.2_Clostridioides_difficile_F665_Contig_ST3	ST3		0.88	0.07	0.15	0	0.18	0.61	0.06	0.7	0.26	0.27	0.95	0.96	0.99	0.99	0.99	0.94	0	0.3	0.4	0	0	0	0	0	0	0.15	0	0.44	0.08	0	0	0.5	0.21	0.09	0.05	0.4	0.29	0.34	0	0.39	0.15	0.19	0.1	0	0	0	0.05
GCA_001077535.1_Clostridioides_difficile_ATCC_9689_DSM_1296_phiCDIF1296T_Complete_Genome_ST3	ST3		0.36	0.99	0.99	0.97	0.98	0.13	0.06	0	0.13	0.22	0.88	0.87	0.93	0.38	0.42	0	0	0.1	0	0	0	0	0	0.42	0	0.15	0	0	0.08	0	0	0.12	0	0.09	0.04	0.36	0.29	0.34	0	0.11	0.15	0.2	0.11	0	0	0	0
GCA_001971825.1_Clostridioides_difficile_20110869_Contig_ST3	ST3		0.36	0.99	0.99	0.97	0.98	0.19	0.07	0	0	0.17	0.68	0.58	0.74	0.29	0.17	0	0	0.1	0	0.18	0	0	0	0	0	0.15	0	0	0.08	0	0	0.12	0	0.09	0.06	0.39	0.29	0.34	0.93	0.11	0.15	0.2	0.11	0	0	0	0
GCA_002073735.1_Clostridioides_difficile_FDAARGOS_267_Complete_Genome_ST3	ST3		0.36	0.99	0.99	0.97	0.98	0.13	0.06	0	0.13	0.22	0.88	0.87	0.93	0.38	0.42	0	0	0.1	0	0	0	0	0	0.42	0	0.15	0	0	0.08	0	0	0.12	0	0.09	0.04	0.36	0.19	0.29	0	0.11	0.15	0.2	0.11	0	0	0	0
GCA_002302285.1_Clostridioides_difficile_6632-NonSp-ST3_Contig_ST3	ST3		0.88	0.07	0.15	0	0.18	0.61	0.06	0	0	0.28	0.88	0.87	0.93	0.39	0.42	0	0	0.1	0	0	0.05	0	0	0.44	0	0.15	0	0	0.08	0	0	0.12	0.21	0.09	0.05	0.4	0.29	0.34	0	0.11	0.15	0.19	0.1	0	0	0	0.05
GCA_002302865.1_Clostridioides_difficile_7479-NonSp-ST3_Contig_ST3	ST3		0.88	0.07	0.15	0	0.18	0.61	0.26	0.7	0.26	0.28	0.95	0.96	0.99	0.99	0.99	0.94	0	0.3	0.4	0	0.05	0	0	0.44	0	0.15	0	0.44	0.08	0	0	0.5	0.21	0.31	0.3	0.4	0.29	0.34	0	0.39	0.15	0.19	0.1	0	0	0	0.05
GCA_900008525.1_Clostridioides_difficile_VL_0302_Contig_ST3	ST3		0.36	0.99	0.99	0.97	0.98	0.33	0.26	0	0	0.25	0.68	0.58	0.74	0.3	0.38	0	0	0.28	0.3	0.18	0.18	0	0	0.19	0	0.15	0	0	0.08	0	0	0.12	0	0.25	0.29	0.39	0.29	0.34	0.93	0.11	0.29	0.62	0.11	0	0.21	0	0.1
GCA_900008555.1_Clostridioides_difficile_VL_0311_Contig_ST3	ST3		0.36	0.99	0.99	0.97	0.98	0.2	0.07	0	0.13	0.14	0.68	0.58	0.74	0.3	0.38	0	0	0.1	0	0	0	0	0	0	0	0.15	0	0	0.08	0	0	0.12	0	0.09	0.07	0.36	0.29	0.34	0.93	0.11	0.15	0.2	0.11	0	0	0	0
GCA_900008815.1_Clostridioides_difficile_VL_0444_Contig_ST3	ST3		0.88	0.07	0.15	0	0.18	0.61	0.06	0	0	0.28	0.88	0.87	0.93	0.39	0.42	0	0	0.1	0	0	0.05	0	0	0.44	0	0.15	0	0	0.09	0	0	0.12	0.21	0.09	0.05	0.4	0.29	0.34	0	0.11	0.14	0.19	0.1	0	0	0	0.05
GCA_900009425.1_Clostridioides_difficile_VL_0242_Contig_ST3	ST3		0.88	0.07	0.15	0	0.18	0.98	0.06	0	0	0.28	0.88	0.87	0.93	0.39	0.42	0	0	0.1	0	0	0.05	0	0	0.44	0	0.15	0	0	0.08	0	0	0.12	0.21	0.09	0.05	0.4	0.29	0.34	0	0.11	0.15	0.19	0.1	0	0	0	0.05
GCA_900009735.1_Clostridioides_difficile_VL_0411_Contig_ST3	ST3		0.36	0.99	0.99	0.97	0.98	0.2	0.26	0	0.13	0.25	0.68	0.58	0.74	0.3	0.38	0	0	0.28	0.3	0	0	0	0	0	0	0.15	0	0	0.08	0	0	0.12	0	0.25	0.29	0.44	0.29	0.34	0.93	0.11	0.22	0.2	0.11	0	0	0	0.05
GCA_900010485.1_Clostridioides_difficile_VL_0088_Contig_ST3	ST3		0.36	0.99	0.99	0.97	0.98	0.33	0.14	0	0	0.25	0.68	0.58	0.74	0.3	0.38	0	0	0.28	0.3	0.18	0.18	0	0	0.12	0	0.15	0	0	0.08	0	0	0.12	0	0.15	0.15	0.39	0.29	0.34	0.93	0.11	0.29	0.62	0.11	0	0.21	0	0.1
GCA_900010995.1_Clostridioides_difficile_VL_0459_Contig_ST3	ST3		0.36	0.99	0.99	0.97	0.98	0.2	0.26	0	0.13	0.25	0.68	0.58	0.74	0.3	0.38	0	0	0.28	0.3	0	0	0	0	0.19	0	0.15	0	0	0.08	0	0	0.12	0	0.25	0.29	0.39	0.29	0.34	0.93	0.11	0.22	0.2	0.11	0	0	0	0.05
GCA_900011115.1_Clostridioides_difficile_VL_0231_Contig_ST3	ST3		0.9	0.07	0.15	0	0.11	0.4	0.3	0	0.13	0.22	0.68	0.58	0.74	0.29	0.38	0	0	0.1	0	0	0	0	0	0.44	0	0.15	0	0	0.08	0	0.07	0.12	0	0.27	0.75	0.34	0.29	0.34	0	0.11	0.15	0.19	0.1	0	0	0	0.04
GCA_900011415.1_Clostridioides_difficile_VL_0060_Contig_ST3	ST3		0.36	0.99	0.99	0.97	0.98	0.2	0.26	0	0.13	0.25	0.68	0.58	0.74	0.3	0.38	0	0	0.28	0.3	0	0	0	0	0	0	0.15	0	0	0.08	0	0	0.12	0	0.25	0.29	0.44	0.29	0.34	0.93	0.11	0.22	0.2	0.11	0	0	0	0.05
GCA_900011865.1_Clostridioides_difficile_VL_0069_Contig_ST3	ST3		0.36	0.99	0.99	0.97	0.98	0.2	0.26	0	0.13	0.25	0.68	0.58	0.74	0.3	0.38	0	0	0.28	0.3	0	0	0	0	0.19	0	0.15	0	0	0.08	0	0	0.12	0	0.25	0.29	0.39	0.29	0.34	0.93	0.11	0.22	0.2	0.11	0	0	0	0.05
GCA_900011975.1_Clostridioides_difficile_VL_0095_Contig_ST3	ST3		0.36	0.99	0.99	0.97	0.98	0.21	0.07	0	0.13	0.22	0.88	0.87	0.93	0.38	0.42	0	0	0.1	0	0	0	0	0	0.42	0	0.15	0	0	0.08	0	0	0.12	0	0.09	0.07	0.36	0.29	0.34	0	0.11	0.15	0.2	0.1	0	0	0	0
GCA_900012045.1_Clostridioides_difficile_VL_0113_Contig_ST3	ST3		0.88	0.07	0.15	0	0.18	0.61	0.08	0.46	0	0.28	0.88	0.87	0.93	0.39	0.42	0	0.13	0.1	0.12	0	0.05	0	0	0.44	0	0.15	0	0.36	0.08	0	0	0.12	0.21	0.1	0.05	0.4	0.29	0.34	0	0.36	0.15	0.19	0.1	0	0	0	0.05
GCA_900012195.1_Clostridioides_difficile_VL_0147_Contig_ST3	ST3		0.88	0.07	0.15	0	0.18	0.98	0.06	0	0	0.28	0.88	0.87	0.93	0.39	0.42	0	0	0.1	0	0	0.05	0	0	0.44	0	0.15	0	0	0.08	0	0	0.12	0.21	0.09	0.05	0.4	0.29	0.34	0	0.11	0.15	0.19	0.1	0	0	0	0.05
GCA_900012355.1_Clostridioides_difficile_VL_0352_Contig_ST3	ST3		0.36	0.99	0.99	0.97	0.98	0.56	0.07	0	0.13	0.25	0.68	0.58	0.74	0.3	0.38	0	0	0.1	0	0	0.03	0	0	0	0	0.15	0	0	0.08	0	0	0.12	0	0.09	0.07	0.36	0.29	0.34	0	0	0.15	0.19	0.1	0	0	0	0
GCA_900012715.1_Clostridioides_difficile_VL_0137_Contig_ST3	ST3		0.36	0.99	0.99	0.97	0.98	0.33	0.26	0	0	0.25	0.68	0.58	0.74	0.3	0.38	0	0	0.28	0.3	0.18	0.18	0	0	0.14	0	0.15	0	0	0.09	0	0	0.12	0	0.25	0.29	0.39	0.29	0.34	0.93	0.11	0.29	0.62	0.11	0	0.21	0	0.1
GCA_900013905.1_Clostridioides_difficile_VL_0307_Contig_ST3	ST3		0.88	0.07	0.15	0	0.18	0.61	0.06	0.7	0.26	0.27	0.95	0.96	0.99	0.99	0.99	0.94	0	0.31	0.39	0	0	0	0	0	0	0.15	0	0.44	0.08	0	0	0.5	0.21	0.09	0.05	0.4	0.29	0.34	0	0.39	0.15	0.19	0.1	0	0	0	0.05
GCA_900014615.1_Clostridioides_difficile_VL_0404_Contig_ST3	ST3		0.88	0.07	0.15	0	0.18	0.61	0.06	0	0	0.28	0.88	0.87	0.93	0.39	0.42	0	0	0.1	0	0	0.05	0	0	0.44	0	0.15	0	0	0.08	0	0	0.12	0.21	0.09	0.05	0.4	0.29	0.34	0	0.11	0.15	0.19	0.1	0	0	0	0.05
GCA_900014875.1_Clostridioides_difficile_VL_0096_Contig_ST3	ST3		0.88	0.07	0.15	0	0.18	0.98	0.06	0	0	0.28	0.88	0.87	0.93	0.39	0.42	0	0	0.1	0	0	0.05	0	0	0.44	0	0.15	0	0	0.08	0	0	0.12	0.21	0.09	0.05	0.4	0.29	0.34	0	0.11	0.15	0.19	0.1	0	0	0	0.05
GCA_900014885.1_Clostridioides_difficile_VL_0097_Contig_ST3	ST3		0.88	0.07	0.15	0	0.18	0.61	0.14	0	0	0.28	0.88	0.87	0.93	0.39	0.42	0	0	0.1	0	0	0.06	0	0	0.44	0	0.15	0	0	0.08	0	0	0.12	0.21	0.16	0.15	0.97	1	0.34	0	0.11	0.15	0.19	0.1	0	0	0	0.05
GCA_900015065.1_Clostridioides_difficile_VL_0373_Contig_ST3	ST3		0.36	0.99	0.99	0.97	0.98	0.33	0.26	0	0	0.25	0.68	0.58	0.74	0.3	0.38	0	0	0.28	0.3	0.18	0.18	0	0	0.19	0	0.15	0	0	0.08	0	0	0.12	0	0.25	0.29	0.39	0.29	0.34	0.93	0.11	0.29	0.62	0.11	0	0.21	0	0.1
GCA_900015175.1_Clostridioides_difficile_VL_0422_Contig_ST3	ST3		0.88	0.07	0.15	0	0.18	0.61	0.08	0.46	0	0.28	0.88	0.87	0.93	0.39	0.42	0	0.13	0.1	0.12	0	0.05	0	0	0.44	0	0.15	0	0.36	0.08	0	0	0.12	0.21	0.1	0.05	0.4	0.29	0.34	0	0.36	0.15	0.19	0.1	0	0	0	0.05
GCA_900015185.1_Clostridioides_difficile_VL_0458_Contig_ST3	ST3		0.88	0.07	0.15	0	0.18	0.59	0.06	0	0	0.28	0.88	0.87	0.93	0.39	0.42	0	0	0.1	0	0	0.05	0	0	0.44	0	0.15	0	0	0.08	0	0	0.12	0.21	0.09	0.05	0.4	0.29	0.34	0	0.11	0.15	0.19	0.1	0	0	0	0.05
GCA_900015345.1_Clostridioides_difficile_VL_0250_Contig_ST3	ST3		0.88	0.07	0.15	0	0.18	0.61	0.06	0	0	0.28	0.88	0.87	0.93	0.39	0.42	0	0	0.1	0	0	0.05	0	0	0.44	0	0.15	0	0	0.08	0	0	0.12	0.21	0.09	0.05	0.4	0.29	0.34	0	0.11	0.15	0.19	0.1	0	0	0	0.05
GCA_900015555.1_Clostridioides_difficile_VL_0001_Contig_ST3	ST3		0.88	0.07	0.15	0	0.18	0.61	0.08	0.46	0	0.28	0.88	0.87	0.93	0.39	0.42	0	0.13	0.1	0.12	0	0.05	0	0	0.44	0	0.15	0	0.36	0.08	0	0	0.12	0.21	0.1	0.05	0.4	0.29	0.34	0	0.36	0.15	0.19	0.1	0	0	0	0.05
GCA_900074635.1_Clostridioides_difficile_CD105KSE3_Contig_ST3	ST3		0.36	0.99	0.99	0.97	0.98	0.28	0.07	0	0.13	0.14	0.68	0.58	0.74	0.3	0.38	0	0	0.1	0	0	0	0	0	0	0	0.15	0	0	0.09	0	0	0.12	0	0.09	0.07	0.36	0.29	0.34	0	0	0.15	0.19	0.11	0	0	0	0
GCA_900074645.1_Clostridioides_difficile_CD105KSE4_Contig_ST3	ST3		0.36	0.99	0.99	0.97	0.98	0.28	0.06	0	0	0.14	0.68	0.58	0.74	0.3	0.38	0	0	0.1	0	0	0	0	0	0	0.23	0.15	0	0	0.09	0	0	0.12	0	0.09	0.04	0.36	0.29	0.34	0	0	0.15	0.19	0.11	0	0	0	0
GCA_000451985.1_Clostridioides_difficile_P51_Contig_ST31	ST31		0.9	0.99	0.99	0.97	0.99	0.98	0.22	0.46	0.13	0.27	0.68	0.58	0.74	0.51	0.58	0	0.66	0.31	0.53	0.49	0.68	0	0	0.79	0.8	0.57	0	0.36	0.08	0	0	0.12	0.21	0.28	0.26	0.39	0.29	0.34	0	0.36	0.15	0.19	0.1	0	0.21	0	0.23
GCA_900013795.1_Clostridioides_difficile_VL_0269_Contig_ST32	ST32		0.73	0.8	0.84	1	1	0.55	0.27	0	0	0.15	0.68	0.58	0.74	0.3	0.38	0	0	0.1	0	0	0	0	0	0	0	0.15	0	0	0.08	0	0	0.12	0.22	0.31	0.3	0.32	0.29	0.34	0	0	0.15	0.19	0.1	0	0	0	0
GCA_000452085.2_Clostridioides_difficile_P70_Contig_ST34	ST34		0.9	0.98	0.99	0.97	0.99	0.36	0.07	0	0.13	0.14	0.68	0.58	0.74	0.3	0.38	0	0	0.1	0	0	0	0	0	0	0	0.15	0	0	0.08	0	0	0.12	0.21	0.09	0.07	0.39	0.29	0.34	0	0.11	0.15	0.19	0.1	0	0	0	0
GCA_000452145.1_Clostridioides_difficile_P73_Contig_ST34	ST34		0.9	0.98	0.99	0.97	0.99	0.36	0.07	0	0.13	0.14	0.68	0.58	0.74	0.3	0.38	0	0	0.1	0	0	0	0	0	0	0	0.15	0	0	0.08	0	0	0.12	0.21	0.09	0.07	0.39	0.29	0.34	0	0.11	0.15	0.19	0.1	0	0	0	0
GCA_000452185.2_Clostridioides_difficile_P75_Contig_ST34	ST34		0.9	0.98	0.99	0.97	0.99	0.36	0.07	0	0.13	0.14	0.68	0.58	0.74	0.3	0.38	0	0	0.1	0	0	0	0	0	0	0	0.15	0	0	0.08	0	0	0.12	0.21	0.09	0.07	0.39	0.29	0.34	0	0.11	0.15	0.19	0.1	0	0	0	0
GCA_002303265.1_Clostridioides_difficile_6614-AL-ST34_Contig_ST34	ST34		0.9	0.98	0.99	0.97	0.99	0.36	0.07	0	0.13	0.14	0.68	0.58	0.74	0.3	0.38	0	0	0.1	0	0.18	0	0	0	0	0	0.15	0	0	0.08	0	0	0.12	0.21	0.09	0.07	0.39	0.29	0.34	0	0.11	0.15	0.19	0.1	0	0	0	0
GCA_900010935.1_Clostridioides_difficile_VL_0259_Contig_ST34	ST34		0.9	0.98	0.99	0.97	0.99	0.36	0.07	0	0.13	0.14	0.68	0.58	0.74	0.3	0.38	0	0	0.1	0	0	0	0	0	0	0	0.15	0	0	0.08	0	0	0.12	0.21	0.09	0.07	0.39	0.29	0.34	0	0.11	0.15	0.19	0.1	0	0	0	0
GCA_900012705.1_Clostridioides_difficile_VL_0033_Contig_ST34	ST34		0.9	0.98	0.99	0.97	0.99	0.36	0.07	0	0.13	0.14	0.68	0.48	0.74	0.3	0.38	0	0	0.1	0	0	0	0	0	0	0	0.15	0	0	0.08	0	0	0.12	0.21	0.09	0.07	0.39	0.29	0.34	0	0.11	0.15	0.19	0.1	0	0	0	0
GCA_900013115.1_Clostridioides_difficile_VL_0232_Contig_ST34	ST34		0.9	0.98	0.99	0.97	0.99	0.36	0.07	0	0.13	0.14	0.68	0.58	0.74	0.3	0.38	0	0	0.1	0	0	0	0	0	0	0	0.15	0	0	0.08	0	0	0.12	0.21	0.09	0.07	0.39	0.29	0.34	0	0.11	0.15	0.19	0.1	0	0	0	0
GCA_900015055.1_Clostridioides_difficile_VL_0306_Contig_ST34	ST34		0.9	0.98	0.99	0.97	0.99	0.11	0.07	0	0.13	0.14	0.68	0.58	0.74	0.3	0.38	0	0	0.1	0	0.18	0	0	0	0	0	0.15	0	0	0.08	0	0	0.12	0.21	0.09	0.05	0.39	0.29	0.34	0	0.11	0.15	0.19	0.1	0	0	0	0
GCA_900015355.1_Clostridioides_difficile_VL_0289_Contig_ST34	ST34		0.9	0.98	0.99	0.97	0.99	0.36	0.07	0	0.13	0.14	0.68	0.58	0.74	0.3	0.38	0	0	0.1	0	0	0	0	0	0	0	0.15	0	0	0.08	0	0	0.12	0.21	0.09	0.07	0.39	0.29	0.34	0	0.11	0.15	0.19	0.1	0	0	0	0
GCA_000451745.2_Clostridioides_difficile_P29_Contig_ST35	ST35		0.9	0.07	0.15	0	0.18	0.55	0.31	0.42	0.13	0.28	0.68	0.58	0.94	0.39	0.42	0.44	0	0.1	0	0	0.05	0	0	0.44	0	0.15	0	0.39	0.11	0	0	0.12	0	0.31	0.32	0.44	0.29	0.34	1	0.33	0.15	0.19	0.1	0.21	0	0	0
GCA_900011695.1_Clostridioides_difficile_VL_0415_Contig_ST35	ST35		0.9	0.07	0.15	0	0.18	0.06	0.3	0	0.13	0.28	0.88	0.87	0.93	0.39	0.42	0	0	0.1	0	0.31	0.47	0	0	0.44	0	0.15	0	0	0.08	0	0	0.12	0	0.27	0.74	0.36	0.87	0.34	0.92	0.11	0.15	0.19	0.1	0.19	0.33	0	0.28
GCA_002301035.1_Clostridioides_difficile_5487-NonSp-novelST_Contig_ST358	ST358		0.68	0.99	0.99	0.97	0.99	0.35	0.07	0	0.13	0.25	0.68	0.58	0.74	0.3	0.38	0	0	0.1	0	0	0	0	0	0	0	0.15	0	0	0.09	0	0	0.12	0.21	0.09	0.07	0.31	0.29	0.34	0.92	0	0.15	0.2	0.11	0	0	0	0
GCA_002302585.1_Clostridioides_difficile_7457-NonSp-novelST_Contig_ST363	ST363		0.9	0.07	0.15	0	0.18	0.2	0.26	0	0.13	0.28	0.68	0.57	0.73	0.3	0.38	0	0	0.1	0	0	0.05	0	0	0.44	0	0.15	0	0	0.08	0	0	0.12	0	0.31	0.3	0.39	0.29	0.34	0	0	0.15	0.19	0.1	0	0	0	0
GCA_002302845.1_Clostridioides_difficile_7478-NonSp-novelST_Contig_ST364	ST364		0.36	0.99	1	1	1	0.58	0	0	0.13	0.28	0.68	0.58	0.74	0.3	0.38	0	0	0.1	0	0.18	0	0	0	0	0	0.14	0	0	0.08	0	0	0.12	0.22	0.07	0	0.36	0.29	0.34	0	0	0.15	0.19	0.1	0	0	0	0
GCA_002303105.1_Clostridioides_difficile_7497-NonSp-novelST_Contig_ST365	ST365		0.93	0.99	1	1	1	0.6	0.27	0	0	0.15	0.67	0.59	0.63	0.3	0.38	0	0	0.1	0	0.15	0.04	0	0	0	0	0.15	0	0	0.09	0	0	0.12	0	0.31	0.3	0.38	0.29	0.34	0	0	0.15	0.19	0.1	0	0	0	0.04
GCA_002301255.1_Clostridioides_difficile_5502-NonSp-novelST_Contig_ST366	ST366		0.93	1	1	1	1	0.58	0.27	0	0	0.16	0.68	0.59	0.74	0.3	0.38	0	0	0.1	0	0	0	0	0	0	0	0.15	0	0	0.08	0	0	0.12	0.21	0.31	0.3	0.39	0.29	0.34	0	0	0.15	0.19	0.1	0	0	0	0.04
GCA_002303415.1_Clostridioides_difficile_6616-NonSp-novelST_Contig_ST367	ST367		0.9	0.07	0.15	0	0.18	0.55	0.27	0	0.13	0.29	0.76	0.82	0.93	0.39	0.42	0.44	0	0.1	0	0	0.05	0	0	0.44	0	0.15	0	0	0.09	0	0	0.12	0	0.31	0.31	0.44	0.29	0.34	1	0.11	0.15	0.19	0.1	0	0	0	0
GCA_002303695.1_Clostridioides_difficile_6629-NonSp-novelST_Contig_ST367	ST367		0.9	0.07	0.15	0	0.18	0.55	0.27	0	0.13	0.29	0.88	0.87	0.81	0.39	0.42	0.44	0	0.1	0	0	0.05	0	0	0.44	0	0.15	0	0	0.09	0	0	0.12	0	0.31	0.31	0.44	0.29	0.34	1	0.11	0.15	0.19	0.1	0	0	0	0
GCA_000449945.2_Clostridioides_difficile_DA00065_Contig_ST37	ST37		0.67	0.07	0.15	0	0.18	0.06	0.14	0	0	0.23	0.67	0.59	0.74	0.3	0.37	0	0	0.22	0.19	0	0.06	0	0	0.43	0.13	0.3	0	0	0.09	0	0	0.12	0	0.17	0.15	1	1	0.34	0.93	0	0.15	0.19	0.11	0.17	0	0	0.05
GCA_000452125.2_Clostridioides_difficile_P71_Contig_ST37	ST37		0.67	0.07	0.15	0	0.18	0.06	0.14	0	0	0.23	0.67	0.59	0.74	0.3	0.37	0	0	0.22	0.19	0	0.06	0	0	0.43	0.13	0.3	0	0	0.09	0	0	0.12	0	0.17	0.15	1	1	0.34	0.93	0	0.15	0.19	0.11	0.17	0	0	0.05
GCA_000452165.2_Clostridioides_difficile_P74_Contig_ST37	ST37		0.67	0.07	0.15	0	0.18	0.61	0.14	0	0	0.23	0.67	0.59	0.74	0.3	0.37	0	0	0.22	0.19	0	0.06	0	0	0.44	0	0.15	0	0	0.09	0	0	0.12	0.21	0.16	0.15	0.99	1	0.34	0.92	0	0.15	0.19	0.11	0	0	0	0.05
GCA_001971875.1_Clostridioides_difficile_20110960_Contig_ST37	ST37		0.67	0.07	0.15	0	0.18	0.61	0.26	0	0	0.25	0.67	0.59	0.74	0.3	0.37	0	0	0.22	0.19	0	0	0	0	0.43	0	0.15	0	0	0.39	0	0	0.12	0.21	0.31	0.3	0.44	0.29	0.34	0.92	0	0.15	0.19	0.46	0.21	0	0	0.04
GCA_001972195.1_Clostridioides_difficile_20121412_Contig_ST37	ST37		0.67	0.07	0.15	0	0.18	0.2	0.14	0	0	0.23	0.67	0.59	0.74	0.3	0.37	0	0	0.22	0.19	0	0.06	0	0	0.43	0.13	0.3	0	0	0.09	0	0	0.12	0	0.17	0.15	1	1	0.34	0.93	0	0.15	0.19	0.11	0.17	0	0	0.05
GCA_002302945.1_Clostridioides_difficile_7483-CF-ST37_Contig_ST37	ST37		0.67	0.07	0.15	0	0.18	0.06	0.14	0	0	0.23	0.67	0.59	0.74	0.3	0.37	0	0	0.22	0.19	0.14	0.06	0	0	0.43	0.13	0.3	0	0	0.09	0	0	0.12	0	0.17	0.15	1	1	0.34	0.93	0	0.15	0.19	0.11	0.17	0	0	0.05
GCA_002303045.1_Clostridioides_difficile_7492-CF-ST37_Contig_ST37	ST37		0.67	0.07	0.15	0	0.18	0.06	0.14	0	0	0.23	0.67	0.59	0.74	0.3	0.37	0	0	0.22	0.19	0.15	0.06	0	0	0.43	0.13	0.3	0	0	0.09	0	0	0.12	0	0.17	0.15	1	1	0.34	0.93	0	0.15	0.19	0.11	0.17	0	0	0.05
GCA_001757585.1_Clostridioides_difficile_19_3_Contig_ST39	ST39		0.69	0.91	0.93	0.9	0.92	0.97	0.26	0	0	0.26	0.68	0.59	0.74	0.3	0.37	0	0	0.22	0.19	0.23	0.35	0	0	0.44	0	0.15	0	0	0.08	0	0	0.54	0.63	0.31	0.32	1	1	0.34	0.92	0	0.15	0.19	0.1	0	0.22	0	0.26
GCA_001757625.1_Clostridioides_difficile_22_1_Contig_ST39	ST39		0.69	0.91	0.93	0.9	0.92	0.97	0.26	0	0	0.26	0.68	0.59	0.74	0.3	0.37	0	0	0.22	0.19	0.23	0.35	0	0	0.44	0	0.15	0	0	0.08	0	0	0.54	0.63	0.31	0.32	1	1	0.34	0.92	0	0.15	0.19	0.1	0	0.22	0	0.26
GCA_900010495.1_Clostridioides_difficile_VL_0237_Contig_ST39	ST39		0.69	0.91	0.93	0.9	0.92	0.97	0.07	0	0	0.25	0.68	0.59	0.74	0.3	0.37	0	0	0.22	0.19	0	0	0	0	0	0	0.15	0	0	0.08	0	0	0.12	0.21	0.09	0.07	0.44	0.29	0.34	0.92	0	0.15	0.19	0.1	0	0	0	0
GCA_900012515.1_Clostridioides_difficile_VL_0353_Contig_ST39	ST39		0.69	0.91	0.93	0.9	0.92	0.97	0.07	0	0	0.25	0.68	0.59	0.74	0.3	0.37	0	0	0.22	0.19	0	0	0	0	0	0	0.15	0	0	0.08	0	0	0.12	0.21	0.09	0.07	0.44	0.29	0.34	0.92	0	0.15	0.19	0.1	0	0	0	0
GCA_900008785.1_Clostridioides_difficile_VL_0330_Contig_ST396	ST396		0.9	1	0.99	1	1	0.18	0.07	0	0	0.14	0.68	0.58	0.74	0.3	0.38	0	0	0.1	0	0	0	0	0	0	0	0.15	0	0	0.09	0	0.05	0.12	0	0.1	0.08	0.33	0.29	0.34	0	0	0.15	0.19	0.1	0	0	0	0.04
GCA_000451945.2_Clostridioides_difficile_P49_Contig_ST4	ST4		0.9	0.98	0.99	0.97	0.99	0.55	0.07	0	0.13	0.26	0.68	0.58	0.74	0.3	0.38	0	0	0.1	0	0.18	0.03	0	0	0	0	0.15	0	0	0.08	0	0	0.12	0	0.09	0.07	0.31	0.29	0.34	0	0	0.15	0.19	0.1	0	0	0	0
GCA_000473645.2_Clostridioides_difficile_P53_Contig_ST4	ST4		0.9	0.98	0.99	0.97	0.99	0.55	0.07	0	0.13	0.26	0.68	0.58	0.74	0.3	0.38	0	0	0.1	0	0	0.03	0	0	0	0	0.15	0	0	0.08	0	0	0.12	0	0.09	0.07	0.31	0.29	0.34	0	0	0.15	0.19	0.1	0	0	0	0
GCA_002301165.1_Clostridioides_difficile_5495-AF-ST41_Contig_ST41	ST41		0.36	0.99	1	0.98	0.99	0.13	0.27	0	0	0.27	0.68	0.59	0.74	0.3	0.38	0	0	0.1	0	0	0	0	0	0	0	0.15	0	0	0.09	0	0.05	0.12	0	0.31	0.3	0.36	0.29	0.34	0	0.11	0.15	0.19	0.1	0	0	0	0.04
GCA_000448985.2_Clostridioides_difficile_CD41_Contig_ST42	ST42		0.9	0.98	0.99	0.97	0.99	0.12	0.07	0	0.13	0.15	0.68	0.58	0.74	0.3	0.38	0	0	0.1	0	0	0	0	0	0	0	0.15	0	0	0.08	0	0	0.12	0	0.09	0.07	0.39	0.29	0.34	0	0	0.15	0.2	0.1	0	0	0	0
GCA_000449665.2_Clostridioides_difficile_CD201_Contig_ST42	ST42		0.9	0.98	0.99	0.97	0.99	0.12	0.07	0	0.13	0.15	0.68	0.58	0.74	0.3	0.38	0	0	0.1	0	0	0	0	0	0	0	0.15	0	0	0.08	0	0	0.12	0	0.09	0.07	0.39	0.29	0.34	0	0	0.15	0.2	0.1	0	0	0	0
GCA_000449685.2_Clostridioides_difficile_CD206_Contig_ST42	ST42		0.9	0.98	0.99	0.97	0.99	0.12	0.07	0	0.13	0.15	0.68	0.58	0.74	0.3	0.38	0	0	0.1	0	0	0	0	0	0	0	0.15	0	0	0.08	0	0	0.12	0	0.09	0.07	0.39	0.29	0.34	0	0	0.15	0.2	0.1	0	0	0	0
GCA_000449725.2_Clostridioides_difficile_CD212_Contig_ST42	ST42		0.9	0.98	0.99	0.97	0.99	0.12	0.06	0	0.13	0.15	0.68	0.58	0.74	0.3	0.23	0	0	0.1	0	0	0	0	0	0	0	0.15	0	0	0.08	0	0	0.12	0	0.09	0.04	0.39	0.29	0.34	0	0	0.15	0.2	0.1	0	0	0	0
GCA_000451245.2_Clostridioides_difficile_CD104_Contig_ST42	ST42		0.9	0.98	0.99	0.97	0.98	0.12	0.24	0	0.13	0.15	0.68	0.58	0.74	0.3	0.38	0.11	0	0.1	0	0	0	0	0	0	0	0.15	0	0	0.08	0	0	0.12	0	0.25	0.27	0.39	0.29	0.34	0	0	0.15	0.2	0.1	0	0	0	0
GCA_001971945.1_Clostridioides_difficile_20110973_Contig_ST42	ST42		0.9	0.98	0.99	0.97	0.99	0.12	0.07	0	0.13	0.15	0.68	0.58	0.74	0.3	0.38	0	0	0.1	0	0	0	0	0	0	0	0.15	0	0	0.08	0	0	0.12	0	0.09	0.07	0.39	0.29	0.34	0	0	0.15	0.2	0.1	0	0	0	0
GCA_001972085.1_Clostridioides_difficile_20110995_Contig_ST42	ST42		0.9	0.98	0.99	0.97	0.99	0.12	0.07	0	0.13	0.15	0.68	0.58	0.74	0.3	0.38	0	0	0.1	0	0	0	0	0	0	0	0.15	0	0	0.08	0	0	0.12	0	0.09	0.07	0.39	0.29	0.34	0	0	0.15	0.2	0.1	0	0	0	0
GCA_002007885.1_Clostridioides_difficile_BR81_Complete_Genome_ST42	ST42		0.9	0.98	0.99	0.97	0.99	0.12	0.26	0	0.13	0.15	0.68	0.58	0.74	0.3	0.38	0.11	0	0.1	0	0	0	0	0	0	0	0.15	0	0	0.08	0	0	0.12	0	0.31	0.3	0.39	0.29	0.34	0	0	0.15	0.2	0.1	0	0	0	0
GCA_002234355.1_Clostridioides_difficile_DH_NAP11_106_ST_42_Complete_Genome_ST42	ST42		0.9	0.98	0.99	0.97	0.99	0.12	0.07	0	0.13	0.15	0.68	0.58	0.74	0.3	0.38	0	0	0.1	0	0	0	0	0	0	0	0.15	0	0	0.08	0	0	0.12	0	0.08	0.07	0.39	0.29	0.34	0	0	0.15	0.2	0.1	0	0	0	0
GCA_002300835.1_Clostridioides_difficile_5475-DH-ST42_Contig_ST42	ST42		0.9	0.98	0.99	0.97	0.99	0.12	0.25	0	0.13	0.15	0.68	0.58	0.74	0.3	0.38	0	0	0.1	0	0.23	0.35	0	0	0	0	0.15	0	0	0.08	0	0.05	0.54	0.63	0.31	0.32	0.39	0.29	0.34	0.17	0	0.15	0.2	0.1	0	0.22	0	0.25
GCA_002300925.1_Clostridioides_difficile_5481-DH-ST42_Contig_ST42	ST42		0.9	0.98	0.99	0.97	0.99	0.12	0.06	0	0.13	0.15	0.68	0.58	0.74	0.3	0.38	0	0	0.1	0	0.16	0	0	0	0	0	0.15	0	0	0.08	0	0.05	0.12	0	0.09	0.04	0.39	0.29	0.34	0.14	0	0.15	0.2	0.1	0	0	0	0
GCA_002301025.1_Clostridioides_difficile_5488-DH-ST42_Contig_ST42	ST42		0.9	0.98	0.99	0.97	0.99	0.12	0.07	0	0.13	0.15	0.68	0.58	0.74	0.3	0.38	0	0	0.1	0	0.16	0	0	0	0	0	0.15	0	0	0.08	0	0.05	0.12	0.27	0.09	0.07	0.39	0.29	0.34	0.14	0	0.15	0.2	0.1	0	0	0	0
GCA_002301125.1_Clostridioides_difficile_5493-DH-ST42_Contig_ST42	ST42		0.9	0.98	0.99	0.97	0.99	0.12	0.07	0	0.13	0.15	0.68	0.58	0.74	0.3	0.38	0	0	0.1	0	0	0	0	0	0	0	0.15	0	0	0.08	0	0	0.12	0	0.09	0.07	0.39	0.29	0.34	0	0	0.15	0.2	0.1	0	0	0	0
GCA_002301245.1_Clostridioides_difficile_5500-DH-ST42_Contig_ST42	ST42		0.9	0.98	0.99	0.97	0.99	0.12	0.07	0	0.13	0.15	0.68	0.58	0.74	0.3	0.38	0	0	0.1	0	0.17	0	0	0	0	0	0.15	0	0	0.08	0	0.05	0.12	0	0.09	0.07	0.39	0.29	0.34	0.14	0	0.15	0.2	0.1	0	0	0	0.05
GCA_002301305.1_Clostridioides_difficile_5547-DH-ST42_Contig_ST42	ST42		0.9	0.98	0.99	0.97	0.99	0.12	0.07	0	0.13	0.25	0.68	0.58	0.74	0.3	0.38	0	0	0.1	0	0.16	0	0	0	0	0	0.15	0	0	0.08	0	0.05	0.12	0	0.09	0.07	0.39	0.29	0.34	0.14	0	0.15	0.2	0.1	0	0	0	0.04
GCA_002301335.1_Clostridioides_difficile_5557-DH-ST42_Contig_ST42	ST42		0.9	0.98	0.99	0.97	0.99	0.12	0.07	0	0.13	0.15	0.68	0.58	0.74	0.3	0.38	0	0	0.1	0	0	0	0	0	0	0	0.15	0	0	0.08	0	0	0.12	0	0.09	0.07	0.39	0.29	0.34	0	0	0.15	0.2	0.1	0	0	0	0
GCA_002301375.1_Clostridioides_difficile_5559-DH-ST42_Contig_ST42	ST42		0.9	0.98	0.99	0.97	0.99	0.12	0.07	0.45	0.13	0.15	0.68	0.58	0.74	0.3	0.38	0	0	0.1	0	0	0	0	0	0	0	0.15	0	0.3	0.08	0	0	0.12	0	0.09	0.07	0.39	0.29	0.34	0	0.34	0.15	0.2	0.1	0.22	0	0	0
GCA_002301575.1_Clostridioides_difficile_5552-DH-ST42_Contig_ST42	ST42		0.9	0.98	0.99	0.97	0.99	0.12	0.07	0.35	0.13	0.15	0.68	0.58	0.74	0.3	0.38	0	0	0.1	0	0.16	0	0	0	0	0	0.15	0	0.45	0.08	0	0.05	0.12	0	0.09	0.07	0.39	0.29	0.34	0.14	0.4	0.15	0.2	0.1	0	0	0	0.04
GCA_002301655.1_Clostridioides_difficile_5616-DH-ST42_Contig_ST42	ST42		0.9	0.98	0.99	0.97	0.99	0.12	0.26	0	0.13	0.15	0.68	0.58	0.74	0.3	0.38	0	0	0.1	0	0.23	0.35	0	0	0	0	0.15	0	0	0.08	0	0	0.54	0.63	0.31	0.32	0.39	0.29	0.34	0	0	0.15	0.2	0.1	0	0.22	0	0.25
GCA_002301675.1_Clostridioides_difficile_5624-DH-ST42_Contig_ST42	ST42		0.9	0.98	0.99	0.97	0.99	0.12	0.07	0	0.13	0.15	0.68	0.58	0.74	0.3	0.38	0	0	0.1	0	0	0	0	0	0	0	0.15	0	0	0.08	0	0	0.12	0	0.09	0.07	0.39	0.29	0.34	0	0	0.15	0.2	0.1	0	0	0	0
GCA_002301765.1_Clostridioides_difficile_6585-DH-ST42_Contig_ST42	ST42		0.9	0.98	0.99	0.97	0.99	0.12	0.07	0	0.13	0.15	0.68	0.58	0.74	0.3	0.38	0	0	0.1	0	0	0	0	0	0	0	0.15	0	0	0.08	0	0	0.12	0	0.09	0.07	0.39	0.29	0.34	0	0	0.15	0.2	0.1	0	0	0	0.04
GCA_002301805.1_Clostridioides_difficile_6589-DH-ST42_Contig_ST42	ST42		0.9	0.98	0.99	0.97	0.99	0.12	0.07	0	0.13	0.15	0.68	0.58	0.74	0.3	0.38	0	0	0.1	0	0	0	0	0	0	0	0.15	0	0	0.08	0	0	0.12	0	0.09	0.07	0.39	0.29	0.34	0	0	0.15	0.2	0.1	0	0	0	0
GCA_002302005.1_Clostridioides_difficile_7450-DH-ST42_Contig_ST42	ST42		0.9	0.98	0.99	0.97	0.99	0.12	0.07	0	0.13	0.15	0.68	0.58	0.74	0.3	0.38	0	0	0.1	0	0.15	0	0	0	0	0	0.15	0	0	0.08	0	0.05	0.12	0	0.09	0.07	0.39	0.29	0.34	0.14	0	0.15	0.2	0.1	0	0	0	0
GCA_002302125.1_Clostridioides_difficile_7456-DH-ST42_Contig_ST42	ST42		0.9	0.98	0.99	0.97	0.99	0.12	0.07	0.45	0.13	0.15	0.68	0.58	0.74	0.3	0.38	0	0	0.1	0	0.16	0	0	0	0	0	0.15	0	0.3	0.08	0	0	0.12	0	0.09	0.07	0.39	0.29	0.34	0	0.34	0.15	0.2	0.1	0.22	0	0	0
GCA_002302225.1_Clostridioides_difficile_7465-DH-ST42_Contig_ST42	ST42		0.9	0.98	0.99	0.97	0.99	0.12	0.07	0	0.13	0.15	0.68	0.58	0.74	0.3	0.38	0	0	0.1	0	0	0	0	0	0	0	0.15	0	0	0.08	0	0	0.12	0	0.09	0.07	0.39	0.29	0.34	0	0	0.15	0.2	0.1	0	0	0	0
GCA_002302245.1_Clostridioides_difficile_7467-DH-ST42_Contig_ST42	ST42		0.9	0.98	0.99	0.97	0.99	0.12	0.07	0	0.13	0.15	0.68	0.58	0.74	0.3	0.38	0	0	0.1	0	0.16	0	0	0	0	0	0.15	0	0	0.08	0	0.05	0.12	0	0.09	0.07	0.39	0.29	0.34	0	0	0.15	0.2	0.1	0	0	0	0
GCA_002302265.1_Clostridioides_difficile_6631-DH-ST42_Contig_ST42	ST42		0.56	0.98	0.99	0.97	0.99	0.12	0.07	0	0.13	0.15	0.68	0.58	0.74	0.3	0.38	0	0	0.1	0	0	0	0	0	0	0	0.15	0	0	0.08	0	0	0.12	0	0.09	0.07	0.39	0.29	0.34	0	0	0.15	0.2	0.1	0	0	0	0
GCA_002302305.1_Clostridioides_difficile_6633-DH-ST42_Contig_ST42	ST42		0.9	0.98	0.99	0.97	0.99	0.12	0.07	0.35	0.13	0.15	0.68	0.58	0.74	0.3	0.38	0	0	0.1	0	0	0	0	0	0	0	0.15	0	0.45	0.08	0	0	0.12	0	0.09	0.07	0.39	0.29	0.34	0	0.4	0.15	0.2	0.1	0	0	0	0
GCA_002302465.1_Clostridioides_difficile_6634-DH-ST42_Contig_ST42	ST42		0.9	0.98	0.99	0.97	0.99	0.12	0.07	0	0.13	0.15	0.68	0.58	0.74	0.3	0.38	0	0	0.1	0	0	0	0	0	0	0	0.15	0	0	0.08	0	0	0.12	0	0.09	0.07	0.39	0.29	0.34	0	0	0.15	0.2	0.1	0	0	0	0
GCA_002302745.1_Clostridioides_difficile_7473-DH-ST42_Contig_ST42	ST42		0.55	0.98	0.99	0.97	0.99	0.12	0.07	0	0.13	0.15	0.68	0.58	0.74	0.3	0.38	0	0	0.1	0	0.15	0	0	0	0	0	0.15	0	0	0.08	0	0.05	0.12	0	0.09	0.07	0.39	0.29	0.34	0	0	0.15	0.2	0.1	0	0	0	0
GCA_002302985.1_Clostridioides_difficile_7487-DH-ST42_Contig_ST42	ST42		0.9	0.98	0.99	0.97	0.99	0.12	0.07	0	0.13	0.15	0.68	0.58	0.74	0.3	0.38	0	0	0.1	0	0.15	0	0	0	0.1	0	0.15	0	0	0.08	0	0.05	0.12	0	0.09	0.07	0.39	0.29	0.34	0	0	0.14	0.2	0.1	0	0	0	0
GCA_002303025.1_Clostridioides_difficile_7491-DH-ST42_Contig_ST42	ST42		0.72	0.98	0.99	0.97	0.99	0.12	0.07	0.45	0.13	0.15	0.68	0.58	0.74	0.3	0.38	0	0	0.1	0	0.15	0	0	0	0	0	0.15	0	0.3	0.08	0	0.05	0.12	0	0.09	0.07	0.39	0.29	0.33	0	0.34	0.15	0.2	0.1	0.22	0	0	0
GCA_002303325.1_Clostridioides_difficile_6607-DH-ST42_Contig_ST42	ST42		0.9	0.98	0.99	0.97	0.99	0.12	0.07	0	0.13	0.15	0.68	0.58	0.74	0.3	0.38	0	0	0.1	0	0	0	0	0	0	0	0.15	0	0	0.08	0	0	0.12	0	0.09	0.07	0.39	0.29	0.34	0	0	0.15	0.2	0.1	0	0	0	0
GCA_002303345.1_Clostridioides_difficile_6609-DH-ST42_Contig_ST42	ST42		0.9	0.98	0.99	0.97	0.99	0.12	0.07	0.45	0.13	0.15	0.68	0.58	0.74	0.3	0.38	0	0	0.1	0	0	0	0	0	0	0	0.15	0	0.3	0.08	0	0	0.12	0	0.09	0.07	0.39	0.29	0.34	0	0.34	0.15	0.2	0.1	0.22	0	0	0
GCA_002303715.1_Clostridioides_difficile_6630-DH-ST42_Contig_ST42	ST42		0.9	0.98	0.99	0.97	0.99	0.12	0.07	0	0.13	0.15	0.68	0.58	0.74	0.3	0.38	0	0	0.1	0	0.15	0	0	0	0	0	0.15	0	0	0.08	0	0.05	0.12	0	0.09	0.07	0.39	0.29	0.34	0	0	0.15	0.2	0.1	0	0	0	0
GCA_002304245.1_Clostridioides_difficile_7466-DH-ST42_Contig_ST42	ST42		0.9	0.98	0.99	0.97	0.99	0.12	0.07	0	0.13	0.15	0.68	0.58	0.74	0.3	0.38	0	0	0.1	0	0	0	0	0	0	0	0.15	0	0	0.08	0	0	0.12	0	0.09	0.07	0.39	0.29	0.34	0	0	0.15	0.2	0.1	0	0	0	0
GCA_002304255.1_Clostridioides_difficile_7462-DH-ST42_Contig_ST42	ST42		0.9	0.98	0.99	0.97	0.99	0.12	0.07	0.45	0.13	0.15	0.68	0.58	0.74	0.3	0.38	0	0	0.1	0	0.16	0	0	0	0	0	0.15	0	0.3	0.08	0	0.05	0.12	0	0.09	0.07	0.39	0.29	0.34	0.16	0.34	0.15	0.2	0.1	0.22	0	0	0
GCA_900013675.1_Clostridioides_difficile_VL_0247_Contig_ST42	ST42		0.9	0.98	0.99	0.97	0.69	0.12	0.24	0	0.13	0.15	0.68	0.58	0.74	0.3	0.38	0.11	0	0.1	0	0	0	0	0	0	0	0.15	0	0	0.08	0	0	0.12	0	0.25	0.28	0.39	0.29	0.34	0	0	0.15	0.2	0.1	0	0	0	0
GCA_000450125.1_Clostridioides_difficile_DA00142_Contig_ST43	ST43		0.36	0.98	0.99	0.97	0.99	0.35	0.07	0	0.13	0.25	0.68	0.58	0.74	0.3	0.38	0	0	0.1	0	0	0	0	0	0	0	0.15	0	0	0.08	0	0	0.12	0.21	0.09	0.07	0.31	0.29	0.34	0	0	0.15	0.19	0.1	0	0	0	0
GCA_000450345.2_Clostridioides_difficile_DA00195_Contig_ST43	ST43		0.36	0.98	0.99	0.97	0.99	0.35	0.07	0	0.13	0.25	0.68	0.58	0.74	0.3	0.38	0	0	0.1	0	0	0	0	0	0	0	0.15	0	0	0.08	0	0	0.12	0.21	0.09	0.07	0.31	0.29	0.34	0	0	0.15	0.19	0.1	0	0	0	0
GCA_000450385.2_Clostridioides_difficile_DA00197_Contig_ST43	ST43		0.36	0.98	0.99	0.97	0.99	0.35	0.07	0	0.13	0.25	0.68	0.58	0.74	0.3	0.38	0	0	0.1	0	0	0	0	0	0	0	0.15	0	0	0.08	0	0	0.12	0.21	0.09	0.07	0.31	0.29	0.34	0	0	0.15	0.19	0.1	0	0	0	0
GCA_000452345.2_Clostridioides_difficile_F601_Contig_ST43	ST43		0.36	0.98	0.99	0.97	0.99	0.35	0.07	0	0.13	0.25	0.68	0.58	0.74	0.3	0.38	0	0	0.1	0	0	0	0	0	0	0	0.15	0	0	0.08	0	0	0.12	0.21	0.09	0.07	0.31	0.29	0.34	0	0	0.15	0.19	0.1	0	0	0	0
GCA_001971935.1_Clostridioides_difficile_20120014_Contig_ST43	ST43		0.36	0.98	0.99	0.97	0.99	0.35	0.07	0	0.13	0.25	0.68	0.58	0.74	0.3	0.38	0	0	0.1	0	0	0	0	0	0	0	0.15	0	0	0.08	0	0	0.12	0.21	0.09	0.07	0.31	0.29	0.34	0	0	0.15	0.19	0.1	0	0	0	0
GCA_002302115.1_Clostridioides_difficile_7455-A-ST43_Contig_ST43	ST43		0.36	0.98	0.99	0.97	0.99	0.35	0.07	0	0.13	0.25	0.68	0.58	0.74	0.3	0.38	0	0	0.1	0	0.15	0	0	0	0	0	0.15	0	0	0.08	0	0.05	0.12	0.21	0.09	0.07	0.31	0.29	0.34	0.14	0	0.15	0.19	0.1	0	0	0	0
GCA_002302835.1_Clostridioides_difficile_7477-A-ST43_Contig_ST43	ST43		0.36	0.98	0.99	0.97	0.99	0.35	0.07	0	0.13	0.25	0.68	0.58	0.74	0.3	0.38	0	0	0.1	0	0	0	0	0	0	0	0.15	0	0	0.08	0	0	0.12	0.21	0.09	0.07	0.31	0.29	0.34	0	0	0.15	0.19	0.1	0	0	0	0
GCA_002303445.1_Clostridioides_difficile_6617-A-ST43_Contig_ST43	ST43		0.36	0.98	0.99	0.97	0.99	0.35	0.07	0	0.13	0.25	0.68	0.58	0.74	0.3	0.38	0	0	0.1	0	0	0	0	0	0	0	0.15	0	0	0.08	0	0	0.12	0.21	0.09	0.07	0.39	0.29	0.34	0	0	0.15	0.19	0.1	0	0	0	0
GCA_002304265.1_Clostridioides_difficile_7486-A-ST43_Contig_ST43	ST43		0.36	0.98	0.99	0.97	0.99	0.35	0.07	0	0.13	0.25	0.68	0.58	0.74	0.3	0.38	0	0	0.1	0	0	0	0	0	0	0	0.15	0	0	0.08	0	0	0.12	0.21	0.09	0.07	0.31	0.29	0.34	0	0	0.15	0.19	0.1	0	0	0	0
GCA_900012725.1_Clostridioides_difficile_VL_0138_Contig_ST436	ST436		0.9	0.99	0.99	0.97	0.68	0.55	0.22	0	0	0.22	0.68	0.58	0.74	0.51	0.58	0	0.66	0.31	0.53	0.49	0.68	0	0	0.59	0.8	0.57	0	0	0.09	0	0	0.12	0	0.28	0.26	0.39	0.29	0.34	0.24	0	0.15	0.19	0.11	0	0.21	0	0.23
GCA_000451305.2_Clostridioides_difficile_CD113_Contig_ST45	ST45		0.9	0.99	0.99	0.97	0.99	0.12	0.22	0	0.13	0.22	0.68	0.58	0.74	0.51	0.58	0	0.66	0.31	0.53	0.49	0.68	0	0	0.79	0.8	0.57	0	0	0.09	0	0	0.12	0	0.28	0.26	0.36	0.29	0.34	0	0.11	0.15	0.19	0.1	0	0.21	0	0.23
GCA_900014265.1_Clostridioides_difficile_VL_0133_Contig_ST45	ST45		0.9	0.99	0.99	0.97	0.99	0.36	0.22	0	0	0.22	0.68	0.58	0.74	0.51	0.58	0	0.66	0.31	0.53	0.49	0.68	0	0	0.79	0.8	0.57	0	0	0.09	0	0	0.12	0	0.28	0.26	0.39	0.29	0.34	0	0.11	0.15	0.19	0.11	0	0.21	0	0.23
GCA_900164575.1_Clostridioides_difficile_VRECD0009_Contig_ST45	ST45		0.9	0.99	0.99	0.97	0.99	0.19	0.22	0	0.13	0.22	0.68	0.58	0.74	0.51	0.58	0	0.66	0.31	0.53	0.49	0.68	0	0	0.79	0.8	0.57	0	0	0.08	0	0	0.12	0	0.28	0.26	0.39	0.29	0.34	0	0.11	0.15	0.19	0.1	0	0.21	0	0.23
GCA_001995155.1_Clostridioides_difficile_VPI_10463_Contig_ST46	ST46		0.9	0.99	0.64	0.97	0.99	0.57	0.22	0	0.13	0.25	0.53	0.58	0.74	0.48	0.58	0	0.66	0.31	0.53	0.49	0.68	0	0	0.79	0.8	0.57	0	0	0.09	0	0	0.09	0.21	0.28	0.26	0.39	0.29	0.33	0	0	0.15	0.19	0.1	0	0.21	0	0.23
GCA_000449045.2_Clostridioides_difficile_CD44_Contig_ST48	ST48		0.9	0.07	0.15	0	0.18	0.12	0.35	0	0.14	0.26	0.88	0.86	0.94	0.96	0.92	0.87	0	0.1	0	0	0	0	0	0	0	0.15	0	0	0.09	0	0	0.12	0	0.31	0.4	0.34	0.29	0.34	1	0	0.15	0.19	0.1	0	0	0	0
GCA_000449785.2_Clostridioides_difficile_824_Contig_ST48	ST48		0.9	0.07	0.15	0	0.18	0.14	0.35	0.42	0.14	0.26	0.88	0.86	0.94	0.96	0.92	0.87	0	0.1	0	0	0	0	0	0.29	0	0.15	0	0.4	0.39	0	0	0.12	0	0.31	0.4	0.44	0.29	0.34	1	0.36	0.15	0.19	0.46	0	0	0	0
GCA_900008715.1_Clostridioides_difficile_VL_0080_Contig_ST49	ST49		0.9	0.99	0.99	0.97	0.99	0.56	0.07	0	0.13	0.25	0.68	0.58	0.74	0.3	0.38	0	0	0.1	0	0	0.03	0	0	0	0	0.15	0	0	0.08	0	0	0.12	0	0.09	0.07	0.39	0.29	0.34	0	0.11	0.15	0.2	0.11	0	0	0	0
GCA_900014005.1_Clostridioides_difficile_VL_0326_Contig_ST49	ST49		0.9	0.99	0.99	0.97	0.99	0.55	0.07	0	0	0.24	0.51	0.48	0.74	0.3	0.38	0	0	0.1	0	0	0.05	0	0	0.51	0	0.15	0	0	0.08	0	0	0.12	0	0.09	0.07	0.39	0.29	0.34	0	0.11	0.15	0.2	0.1	0	0	0.29	0
GCA_900164175.1_Clostridioides_difficile_VRECD0131_Contig_ST49	ST49		0.9	0.99	0.99	0.97	0.99	0.14	0.06	0	0.13	0.25	0.68	0.58	0.74	0.3	0.38	0	0	0.1	0	0	0	0	0	0	0	0.15	0	0	0.08	0	0	0.12	0	0.09	0.04	0.39	0.29	0.34	0	0.11	0.15	0.2	0.1	0	0	0	0
GCA_000949855.1_Clostridioides_difficile_ZJCDC_S82_Scaffold_ST5	ST5		0.69	0.99	0.99	0.99	0.99	0.36	0.26	0.4	0	0.26	0.5	0.48	0.6	0.13	0.21	0	0	0.1	0	0	0	0	0	0.43	0	0.15	0	0.29	0.08	0	0	0.12	0	0.3	0.3	0.4	0.29	0.34	0	0.37	0.52	0.63	0.1	0	0	0	0.05
GCA_001704795.1_Clostridioides_difficile_103_Contig_ST5	ST5		0.69	0.99	0.99	0.99	0.99	0.36	0.26	0	0	0.14	0.34	0.19	0.38	0.11	0.11	0	0	0.1	0	0	0	0	0	0	0	0.15	0	0	0.08	0	0.05	0.12	0.21	0.3	0.3	0.38	0.29	0.34	0	0	0.15	0.19	0.1	0	0	0	0.04
GCA_001704805.1_Clostridioides_difficile_133_Contig_ST5	ST5		0.69	0.99	0.99	0.99	0.99	0.36	0.26	0	0	0.14	0.34	0.19	0.38	0.11	0.11	0	0	0.1	0	0	0	0	0	0	0	0.15	0	0	0.09	0	0	0.12	0	0.3	0.3	0.4	0.29	0.34	0	0	0.15	0.19	0.1	0	0	0	0.05
GCA_000448905.2_Clostridioides_difficile_CD18_Contig_ST53	ST53		0.9	0.98	0.99	0.97	0.99	0.35	0.07	0	0.13	0.25	0.68	0.58	0.74	0.3	0.38	0	0	0.1	0	0	0	0	0	0	0	0.15	0	0	0.08	0	0	0.12	0.21	0.08	0.07	0.31	0.29	0.34	0	0	0.15	0.19	0.1	0	0	0	0
GCA_000451625.2_Clostridioides_difficile_P9_Contig_ST53	ST53		0.9	0.98	0.99	0.97	0.99	0.35	0.07	0	0.13	0.25	0.68	0.58	0.74	0.3	0.38	0	0	0.1	0	0	0	0	0	0	0	0.15	0	0	0.08	0	0	0.12	0.21	0.1	0.07	0.31	0.29	0.34	0	0	0.15	0.19	0.1	0	0	0	0
GCA_001971925.1_Clostridioides_difficile_20111163_Contig_ST53	ST53		0.9	0.98	0.99	0.97	0.99	0.35	0.07	0	0.13	0.25	0.68	0.58	0.74	0.3	0.38	0	0	0.1	0	0	0	0	0	0	0	0.15	0	0	0.08	0	0	0.12	0.21	0.1	0.07	0.31	0.29	0.34	0	0	0.15	0.19	0.1	0	0	0	0
GCA_900011435.1_Clostridioides_difficile_VL_0062_Contig_ST53	ST53		0.9	0.98	0.99	0.97	0.99	0.35	0.07	0	0.13	0.25	0.68	0.58	0.74	0.3	0.38	0	0	0.1	0	0	0	0	0	0	0	0.15	0	0	0.08	0	0	0.12	0.21	0.1	0.07	0.31	0.29	0.34	0	0	0.15	0.19	0.1	0	0	0	0
GCA_900015015.1_Clostridioides_difficile_VL_0040_Contig_ST53	ST53		0.9	0.98	0.99	0.97	0.99	0.35	0.07	0	0.13	0.25	0.68	0.58	0.74	0.3	0.38	0	0	0.1	0	0	0	0	0	0	0	0.15	0	0	0.08	0	0	0.12	0.21	0.1	0.07	0.35	0.29	0.34	0	0	0.15	0.19	0.1	0	0	0	0.04
GCA_000009205.1_Clostridioides_difficile_630_Complete_Genome_ST54	ST54		0.9	0.07	0.15	0	0.18	0.11	0.26	0	0.13	0.29	0.88	0.87	0.93	0.39	0.42	0	0	0.1	0	0	0.05	0	0	0.44	0.12	0.31	0	0	0.08	0	0	0.12	0	0.27	0.31	0.44	0.29	0.34	0.96	0.11	0.15	0.2	0.1	0.17	0	0	0
GCA_000448885.2_Clostridioides_difficile_CD13_Contig_ST54	ST54		0.9	0.07	0.15	0	0.18	0.25	0.07	0	0.13	0.25	0.88	0.87	0.93	0.39	0.42	0	0	0.1	0	0	0.05	0	0	0.44	0	0.15	0	0	0.08	0	0	0.12	0	0.11	0.07	0.39	0.29	0.34	0.92	0.11	0.15	0.2	0.1	0	0	0	0
GCA_000932055.2_Clostridioides_difficile_630_Complete_Genome_ST54	ST54		0.9	0.07	0.15	0	0.18	0.11	0.08	0	0.13	0.29	0.88	0.87	0.93	0.39	0.42	0	0	0.1	0	0	0.05	0	0	0.44	0.12	0.31	0	0	0.08	0	0	0.12	0	0.11	0.07	0.36	0.29	0.34	0.96	0.11	0.15	0.2	0.1	0.17	0	0	0
GCA_000953275.1_Clostridioides_difficile_630Derm_Complete_Genome_ST54	ST54		0.9	0.07	0.15	0	0.18	0.11	0.26	0	0.13	0.29	0.88	0.87	0.93	0.39	0.42	0	0	0.1	0	0	0.05	0	0	0.44	0.12	0.31	0	0	0.08	0	0	0.12	0	0.27	0.31	0.44	0.29	0.34	0.96	0.11	0.15	0.2	0.1	0.17	0	0	0
GCA_002080065.1_Clostridioides_difficile_630_delta_erm_Complete_Genome_ST54	ST54		0.9	0.07	0.15	0	0.18	0.11	0.26	0	0.13	0.29	0.88	0.87	0.93	0.39	0.42	0	0	0.1	0	0	0.05	0	0	0.44	0.12	0.31	0	0	0.08	0	0	0.12	0	0.27	0.31	0.44	0.29	0.34	0.96	0.11	0.15	0.2	0.1	0.17	0	0	0
GCA_002082945.1_Clostridioides_difficile_FDAARGOS_268_Contig_ST54	ST54		0.9	0.07	0.15	0	0.18	0.11	0.26	0	0.13	0.29	0.88	0.87	0.93	0.39	0.42	0	0	0.1	0	0	0.05	0	0	0.44	0.12	0.31	0	0	0.08	0	0	0.12	0	0.27	0.31	0.44	0.29	0.34	0.96	0.11	0.15	0.2	0.1	0.13	0	0	0
GCA_002302085.1_Clostridioides_difficile_7454-NonSp-ST54_Contig_ST54	ST54		0.9	0.07	0.15	0	0.18	0.11	0.07	0	0.13	0.25	0.88	0.87	0.92	0.39	0.42	0	0	0.1	0	0	0.05	0	0	0.44	0	0.15	0	0	0.08	0	0	0.12	0	0.11	0.07	0.39	0.29	0.34	0.92	0.11	0.15	0.2	0.1	0	0	0	0
GCA_900008435.1_Clostridioides_difficile_VL_0112_Contig_ST54	ST54		0.9	0.07	0.15	0	0.18	0.15	0.07	0	0.13	0.29	0.88	0.87	0.93	0.39	0.42	0	0	0.1	0	0	0.05	0	0	0.44	0	0.15	0	0	0.08	0	0	0.12	0	0.11	0.07	0.41	0.29	0.34	0.92	0.11	0.15	0.2	0.1	0	0	0	0
GCA_900014675.1_Clostridioides_difficile_VL_0431_Contig_ST54	ST54		0.9	0.07	0.15	0	0.18	0.11	0.07	0	0.13	0.27	0.68	0.81	0.94	0.39	0.42	0.44	0	0.1	0	0	0.05	0	0	0.44	0	0.15	0	0	0.08	0	0	0.12	0	0.11	0.07	0.4	0.29	0.34	0.92	0.11	0.15	0.2	0.1	0	0	0	0
GCA_900164045.1_Clostridioides_difficile_VRECD0137_Contig_ST54	ST54		0.9	0.07	0.15	0	0.18	0.15	0.07	0	0.13	0.29	0.88	0.87	0.93	0.39	0.42	0	0	0.1	0	0	0.05	0	0	0.44	0	0.15	0	0	0.08	0	0	0.12	0	0.11	0.07	0.39	0.29	0.34	0.92	0.11	0.15	0.2	0.1	0	0	0	0
GCA_000448725.2_Clostridioides_difficile_CD17_Contig_ST55	ST55		0.9	0.98	0.99	0.97	0.98	0.24	0.07	0	0.13	0.14	0.68	0.58	0.74	0.3	0.38	0	0	0.1	0	0	0	0	0	0	0	0.15	0	0	0.08	0	0	0.12	0	0.09	0.07	0.39	0.29	0.34	0	0	0.15	0.19	0.11	0	0	0	0
GCA_000449085.2_Clostridioides_difficile_CD46_Contig_ST55	ST55		0.9	0.98	0.99	0.97	0.98	0.97	0.07	0	0.13	0.14	0.68	0.58	0.74	0.3	0.38	0	0	0.1	0	0	0.03	0	0	0	0	0.15	0	0	0.08	0	0	0.12	0	0.09	0.07	0.39	0.29	0.34	0	0	0.15	0.19	0.1	0	0	0	0
GCA_000450565.2_Clostridioides_difficile_DA00244_Contig_ST55	ST55		0.9	0.98	0.99	0.97	0.98	0.97	0.07	0	0.13	0.14	0.68	0.58	0.74	0.3	0.38	0	0	0.1	0	0	0.03	0	0	0	0	0.15	0	0	0.08	0	0	0.12	0	0.09	0.07	0.39	0.29	0.34	0	0	0.15	0.19	0.1	0	0	0	0
GCA_000451085.2_Clostridioides_difficile_P24_Contig_ST55	ST55		0.9	0.98	0.99	0.97	0.98	0.97	0.07	0	0.13	0.14	0.68	0.58	0.74	0.3	0.38	0	0	0.1	0	0	0.03	0	0	0	0	0.15	0	0	0.08	0	0	0.12	0	0.09	0.07	0.39	0.29	0.34	0	0	0.15	0.19	0.11	0	0	0	0
GCA_000451105.2_Clostridioides_difficile_P25_Contig_ST55	ST55		0.9	0.98	0.99	0.97	0.98	0.97	0.07	0	0.13	0.14	0.68	0.58	0.74	0.3	0.38	0	0	0.1	0	0	0.03	0	0	0	0	0.15	0	0	0.08	0	0	0.12	0	0.09	0.07	0.39	0.29	0.34	0	0	0.15	0.19	0.11	0	0	0	0
GCA_000451805.1_Clostridioides_difficile_P32_Contig_ST55	ST55		0.9	0.98	0.99	0.97	0.98	0.97	0.07	0	0.13	0.14	0.64	0.58	0.74	0.3	0.38	0	0	0.1	0	0	0.03	0	0	0	0	0.15	0	0	0.08	0	0	0.12	0	0.09	0.07	0.39	0.29	0.34	0	0	0.15	0.19	0.1	0	0	0	0
GCA_001971905.1_Clostridioides_difficile_20110961_Contig_ST55	ST55		0.9	0.98	0.99	0.97	0.98	0.97	0.07	0	0.13	0.14	0.68	0.58	0.74	0.3	0.38	0	0	0.1	0	0	0.03	0	0	0	0	0.15	0	0	0.08	0	0	0.12	0	0.09	0.07	0.39	0.29	0.34	0	0	0.15	0.19	0.1	0	0	0	0
GCA_002300955.1_Clostridioides_difficile_5483-L-ST55_Contig_ST55	ST55		0.9	0.98	0.99	0.97	0.98	0.97	0.07	0	0.13	0.14	0.68	0.58	0.74	0.3	0.38	0	0	0.1	0	0	0.03	0	0	0	0	0.15	0	0	0.08	0	0	0.12	0	0.09	0.07	0.39	0.29	0.34	0	0	0.15	0.19	0.1	0	0	0	0
GCA_002301595.1_Clostridioides_difficile_5553-L-ST55_Contig_ST55	ST55		0.9	0.98	0.99	0.97	0.98	0.24	0.07	0	0.13	0.14	0.68	0.58	0.74	0.3	0.38	0	0	0.1	0	0	0	0	0	0	0	0.15	0	0	0.08	0	0	0.12	0	0.09	0.07	0.39	0.29	0.34	0	0	0.15	0.19	0.1	0	0	0	0
GCA_002304575.1_Clostridioides_difficile_5504-L-ST55_Contig_ST55	ST55		0.9	0.98	0.99	0.97	0.98	0.97	0.07	0	0.13	0.14	0.68	0.58	0.74	0.3	0.38	0	0	0.1	0	0	0.03	0	0	0	0	0.15	0	0	0.08	0	0	0.12	0	0.09	0.07	0.39	0.29	0.34	0	0	0.15	0.19	0.1	0	0	0	0
GCA_900009415.1_Clostridioides_difficile_VL_0103_Contig_ST55	ST55		0.9	0.98	0.99	0.97	0.98	0.97	0.07	0	0.13	0.14	0.68	0.58	0.74	0.3	0.38	0	0	0.1	0	0	0.03	0	0	0	0	0.15	0	0	0.08	0	0	0.12	0	0.09	0.07	0.39	0.29	0.34	0	0	0.15	0.19	0.1	0	0	0	0
GCA_000448865.2_Clostridioides_difficile_CD9_Contig_ST58	ST58		0.9	0.98	0.99	0.97	0.99	0.36	0.07	0	0.13	0.23	0.89	0.87	0.95	0.3	0.38	0.44	0	0.1	0	0	0	0	0	0.44	0	0.15	0	0	0.09	0	0	0.12	0	0.09	0.07	0.39	0.29	0.34	0	0.11	0.15	0.19	0.1	0	0	0	0.05
GCA_000450965.2_Clostridioides_difficile_P5_Contig_ST58	ST58		0.9	0.98	0.99	0.97	0.99	0.36	0.07	0	0.13	0.14	0.68	0.58	0.74	0.3	0.38	0	0	0.1	0	0	0	0	0	0	0	0.15	0	0	0.09	0	0	0.12	0	0.09	0.07	0.39	0.29	0.34	0	0.11	0.15	0.19	0.1	0	0	0	0
GCA_000451665.2_Clostridioides_difficile_P13_Contig_ST58	ST58		0.9	0.98	0.99	0.97	0.99	0.98	0.07	0	0.13	0.14	0.68	0.58	0.74	0.3	0.38	0	0	0.1	0	0	0	0	0	0	0	0.15	0	0	0.08	0	0	0.12	0.21	0.09	0.05	0.36	0.29	0.34	0	0.11	0.15	0.19	0.1	0	0	0	0
GCA_000451905.2_Clostridioides_difficile_P46_Contig_ST58	ST58		0.9	0.98	0.99	0.97	0.99	0.97	0.07	0	0.13	0.17	0.68	0.58	0.74	0.3	0.38	0	0	0.1	0	0	0	0	0	0	0	0.15	0	0	0.08	0	0	0.12	0.21	0.09	0.07	0.36	0.29	0.34	0	0.11	0.15	0.19	0.1	0	0	0	0
GCA_000451925.2_Clostridioides_difficile_P48_Contig_ST58	ST58		0.9	0.98	0.99	0.97	0.99	0.45	0.07	0	0.13	0.17	0.68	0.58	0.74	0.3	0.38	0	0	0.1	0	0.18	0	0	0	0	0	0.15	0	0	0.09	0	0	0.12	0.21	0.09	0.08	0.36	0.29	0.34	0	0.11	0.15	0.19	0.1	0	0	0	0
GCA_000473625.2_Clostridioides_difficile_P37_Contig_ST58	ST58		0.9	0.98	0.99	0.97	0.99	0.36	0.07	0	0.13	0.14	0.68	0.58	0.74	0.3	0.38	0	0	0.1	0	0	0	0	0	0	0	0.15	0	0	0.09	0	0	0.12	0	0.09	0.07	0.39	0.29	0.34	0	0.11	0.15	0.19	0.1	0	0	0	0
GCA_000473685.2_Clostridioides_difficile_P68_Contig_ST58	ST58		0.9	0.98	0.99	0.97	0.99	0.57	0.07	0	0.13	0.17	0.68	0.58	0.74	0.3	0.38	0	0	0.1	0	0	0	0	0	0	0	0.1	0	0	0.08	0	0	0.12	0.21	0.09	0.05	0.36	0.29	0.34	0	0.11	0.15	0.19	0.1	0	0	0	0
GCA_002301835.1_Clostridioides_difficile_6595-AL-ST58_Contig_ST58	ST58		0.9	0.98	0.99	0.97	0.99	0.36	0.07	0	0.13	0.14	0.68	0.58	0.74	0.3	0.38	0	0	0.1	0	0.18	0	0	0	0	0	0.15	0	0	0.09	0	0	0.12	0	0.09	0.07	0.39	0.29	0.34	0	0.11	0.15	0.19	0.1	0	0	0	0
GCA_002301895.1_Clostridioides_difficile_6597-AL-ST58_Contig_ST58	ST58		0.9	0.98	0.99	0.97	0.99	0.99	0.07	0	0.13	0.17	0.68	0.58	0.74	0.3	0.38	0	0	0.1	0	0	0	0	0	0	0	0.15	0	0	0.08	0	0	0.12	0.21	0.09	0.07	0.36	0.29	0.34	0	0.11	0.15	0.19	0.1	0	0	0	0
GCA_002301975.1_Clostridioides_difficile_6637-AL-ST58_Contig_ST58	ST58		0.9	0.98	0.99	0.97	0.99	0.97	0.07	0	0.13	0.17	0.68	0.58	0.74	0.3	0.38	0	0	0.1	0	0	0	0	0	0	0	0.15	0	0	0.09	0	0.05	0.12	0.21	0.09	0.07	0.36	0.29	0.34	0	0.11	0.15	0.19	0.1	0	0	0	0
GCA_002302795.1_Clostridioides_difficile_7474-AL-ST58_Contig_ST58	ST58		0.9	0.98	0.99	0.97	0.99	0.97	0.07	0	0.13	0.17	0.68	0.58	0.74	0.3	0.38	0	0	0.1	0	0	0	0	0	0	0	0.15	0	0	0.09	0	0.05	0.12	0.21	0.09	0.07	0.36	0.29	0.34	0	0.11	0.15	0.19	0.1	0	0	0	0
GCA_002303655.1_Clostridioides_difficile_6627-AL-ST58_Contig_ST58	ST58		0.9	0.98	0.99	0.97	0.99	0.36	0.07	0	0.13	0.14	0.68	0.58	0.74	0.3	0.38	0	0	0.1	0	0.18	0	0	0	0	0	0.15	0	0	0.09	0	0	0.12	0	0.09	0.07	0.39	0.29	0.34	0	0.11	0.15	0.19	0.1	0	0	0	0
GCA_002303675.1_Clostridioides_difficile_6628-AL-ST58_Contig_ST58	ST58		0.9	0.98	0.99	0.97	0.99	0.36	0.07	0	0.13	0.14	0.68	0.58	0.74	0.3	0.38	0	0	0.1	0	0.18	0	0	0	0	0	0.15	0	0	0.09	0	0.05	0.12	0	0.09	0.07	0.39	0.29	0.34	0.14	0.11	0.15	0.19	0.1	0	0	0	0
GCA_900010025.1_Clostridioides_difficile_VL_0110_Contig_ST58	ST58		0.9	0.98	0.93	0.97	0.99	0.36	0.07	0	0.13	0.14	0.68	0.58	0.74	0.3	0.38	0	0	0.1	0	0	0	0	0	0	0	0.15	0	0	0.08	0	0	0.12	0	0.09	0.07	0.39	0.29	0.34	0	0.11	0.15	0.19	0.1	0	0	0	0
GCA_900013205.1_Clostridioides_difficile_VL_0072_Contig_ST58	ST58		0.9	0.98	0.99	0.97	0.68	0.18	0.07	0	0.13	0.17	0.68	0.58	0.74	0.3	0.38	0	0	0.1	0	0	0	0	0	0	0	0.15	0	0	0.09	0	0.05	0.12	0	0.09	0.07	0.36	0.29	0.34	0	0.11	0.15	0.19	0.11	0	0	0	0
GCA_900014115.1_Clostridioides_difficile_VL_0347_Contig_ST58	ST58		0.9	0.98	0.99	0.97	0.99	0.97	0.07	0	0.13	0.17	0.68	0.58	0.74	0.3	0.38	0	0	0.1	0	0	0	0	0	0	0	0.15	0	0	0.09	0	0.05	0.12	0.21	0.09	0.05	0.36	0.29	0.34	0	0.11	0.15	0.19	0.11	0	0	0	0
GCA_900014135.1_Clostridioides_difficile_VL_0037_Contig_ST58	ST58		0.9	0.98	0.99	0.97	0.99	0.36	0.07	0	0.13	0.14	0.68	0.58	0.74	0.3	0.38	0	0	0.1	0	0	0	0	0	0	0	0.15	0	0	0.09	0	0	0.12	0	0.09	0.07	0.39	0.29	0.34	0	0.11	0.15	0.19	0.1	0	0	0	0
GCA_002302905.1_Clostridioides_difficile_7481-NonSp-ST59_Contig_ST59	ST59		0.9	0.07	0.15	0	0.18	0.77	0.07	0	0.13	0.14	0.68	0.58	0.74	0.3	0.38	0	0	0.1	0	0	0	0	0	0	0	0.15	0	0	0.09	0	0	0.12	0.21	0.09	0.07	0.36	0.29	0.34	0	0.11	0.15	0.19	0.1	0	0	0	0
GCA_002302185.1_Clostridioides_difficile_7463-E-ST6_Contig_ST6	ST6		0.89	0.99	0.99	0.97	0.98	0.55	0.24	0.35	0.13	0.25	0.68	0.58	0.74	0.3	0.38	0	0.14	0.1	0	0.18	0.03	0	0	0.18	0	0.15	0	0.39	0.08	0	0	0.12	0	0.36	0.27	0.39	0.29	0.34	0	0.4	0.15	0.19	0.1	0	0	0	0.04
GCA_002352515.1_Clostridioides_difficile_RC10_Contig_ST6	ST6		0.89	0.99	0.99	0.97	0.98	0.55	0.26	0.35	0.13	0.26	0.68	0.58	0.74	0.3	0.38	0	0.14	0.1	0	0	0.03	0	0	0.18	0	0.15	0	0.39	0.08	0	0	0.12	0	0.36	0.31	0.44	0.29	0.34	0	0.4	0.15	0.19	0.1	0	0	0	0
GCA_000449005.2_Clostridioides_difficile_CD42_Contig_ST63	ST63		0.9	0.99	0.99	0.97	0.99	0.11	0.07	0	0.13	0.25	0.67	0.58	0.74	0.3	0.38	0	0	0.1	0	0	0.18	0	0	0	0	0.15	0	0	0.08	0	0	0.12	0	0.09	0.07	0.32	0.29	0.34	0.92	0	0.29	0.62	0.1	0	0.21	0	0.1
GCA_000449445.2_Clostridioides_difficile_CD165_Contig_ST63	ST63		0.9	0.99	0.99	0.97	0.99	0.12	0.26	0.45	0.13	0.25	0.67	0.58	0.74	0.3	0.38	0	0	0.28	0.3	0	0	0	0	0	0	0.15	0	0.3	0.08	0	0	0.12	0	0.25	0.29	0.32	0.29	0.34	0.92	0.34	0.15	0.2	0.1	0.22	0	0	0
GCA_000449565.2_Clostridioides_difficile_DA00261_Contig_ST63	ST63		0.9	0.99	0.99	0.97	0.99	0.12	0.07	0	0.13	0.25	0.67	0.58	0.74	0.3	0.38	0	0	0.1	0	0	0.18	0	0	0	0	0.15	0	0	0.08	0	0	0.12	0	0.09	0.07	0.32	0.29	0.34	0.92	0	0.29	0.62	0.1	0	0.21	0	0.1
GCA_000449625.2_Clostridioides_difficile_DA00275_Contig_ST63	ST63		0.9	0.99	0.99	0.97	0.99	0.12	0.26	0.45	0.13	0.25	0.67	0.58	0.74	0.3	0.38	0	0	0.28	0.3	0	0.18	0	0	0	0	0.15	0	0.3	0.08	0	0	0.12	0	0.25	0.29	0.32	0.29	0.34	0.92	0.34	0.29	0.62	0.1	0.22	0.21	0	0.1
GCA_000449905.2_Clostridioides_difficile_DA00044_Contig_ST63	ST63		0.9	0.99	0.99	0.97	0.99	0.12	0.07	0	0.13	0.25	0.67	0.58	0.74	0.3	0.38	0	0	0.1	0	0	0.18	0	0	0	0	0.15	0	0	0.08	0	0	0.12	0	0.09	0.07	0.32	0.29	0.34	0.92	0	0.29	0.62	0.1	0	0.21	0	0.1
GCA_000450285.2_Clostridioides_difficile_DA00183_Contig_ST63	ST63		0.9	0.99	0.99	0.97	0.99	0.12	0.26	0.45	0.13	0.25	0.67	0.58	0.74	0.3	0.38	0	0	0.28	0.3	0	0.18	0	0	0	0	0.15	0	0.3	0.08	0	0	0.12	0	0.25	0.29	0.32	0.29	0.34	0.92	0.34	0.29	0.62	0.1	0.22	0.21	0	0.1
GCA_000450405.2_Clostridioides_difficile_DA00203_Contig_ST63	ST63		0.9	0.99	0.99	0.97	0.99	0.19	0.07	0	0.13	0.25	0.68	0.58	0.74	0.3	0.38	0	0	0.28	0.31	0	0	0	0	0.16	0	0.15	0	0	0.09	0	0	0.12	0	0.09	0.07	0.36	0.29	0.34	0.92	0.11	0.23	0.2	0.1	0	0	0	0
GCA_000450745.2_Clostridioides_difficile_F249_Contig_ST63	ST63		0.9	0.99	0.99	0.97	0.99	0.11	0.26	0.45	0.13	0.25	0.67	0.58	0.74	0.3	0.38	0	0	0.28	0.3	0	0	0	0	0	0	0.15	0	0.3	0.08	0	0	0.12	0	0.25	0.29	0.32	0.29	0.34	0.92	0.34	0.15	0.2	0.11	0.22	0	0	0
GCA_000450945.2_Clostridioides_difficile_P2_Contig_ST63	ST63		0.9	0.99	0.99	0.97	0.99	0.19	0.07	0	0.13	0.25	0.68	0.58	0.74	0.3	0.38	0	0	0.1	0	0	0	0	0	0.42	0	0.15	0	0	0.11	0	0	0.12	0	0.09	0.07	0.36	0.29	0.34	0.92	0.11	0.15	0.2	0.11	0.21	0	0	0
GCA_000451425.2_Clostridioides_difficile_Y231_Contig_ST63	ST63		0.9	0.99	0.99	0.97	0.99	0.11	0.98	0.95	0.95	0.99	0.95	0.96	0.99	0.99	0.99	0.93	0.97	0.97	0.99	0.95	0.95	1	1	0.96	0.93	0.98	0.95	0.43	0.08	0	0	0.54	0.63	0.31	0.32	0.32	0.29	0.34	0.92	0.4	0.15	0.19	0.1	0	0.22	0	0.25
GCA_000451525.2_Clostridioides_difficile_Y358_Contig_ST63	ST63		0.9	0.99	0.99	0.97	0.99	0.11	0.26	0.45	0.13	0.25	0.68	0.58	0.74	0.3	0.38	0	0	0.1	0	0.21	0.35	0	0	0	0	0.15	0	0.3	0.08	0	0	0.12	0	0.31	0.32	0.44	0.29	0.34	0.92	0.34	0.15	0.2	0.1	0.22	0.23	0	0.26
GCA_000451705.1_Clostridioides_difficile_P19_Contig_ST63	ST63		0.9	0.99	0.99	0.97	0.99	0.19	0.26	0.46	0.13	0.27	0.68	0.58	0.74	0.3	0.38	0	0.11	0.1	0	0	0	0	0	0.42	0	0.15	0	0.4	0.11	0	0	0.12	0	0.31	0.3	0.36	0.29	0.34	0.92	0.37	0.15	0.2	0.1	0.21	0	0	0
GCA_900007585.1_Clostridioides_difficile_VL_0004_Contig_ST63	ST63		0.9	0.99	0.99	0.97	0.99	0.12	0.07	0	0.13	0.25	0.68	0.58	0.74	0.3	0.38	0	0	0.1	0	0	0	0	0	0.33	0	0.15	0	0	0.11	0	0	0.12	0.06	0.09	0.07	0.44	0.29	0.34	0.92	0.11	0.15	0.2	0.1	0.21	0	0	0
GCA_000450785.2_Clostridioides_difficile_F314_Contig_ST67	ST67		0.93	1	1	1	1	0.6	0.27	0	0	0.14	0.68	0.59	0.74	0.3	0.38	0	0	0.1	0	0	0.04	0	0	0	0	0.15	0	0	0.08	0	0	0.12	0	0.31	0.3	0.23	0.29	0.34	0	0	0.15	0.19	0.1	0	0	0	0.04
GCA_001971865.1_Clostridioides_difficile_20100502_Contig_ST67	ST67		0.93	1	1	1	1	0.6	0.27	0	0	0.14	0.68	0.59	0.74	0.3	0.38	0	0	0.1	0	0	0.04	0	0	0	0	0.15	0	0	0.08	0	0	0.12	0	0.31	0.3	0.23	0.29	0.34	0	0	0.15	0.19	0.1	0	0	0	0.04
GCA_002301465.1_Clostridioides_difficile_5544-AH-ST67_Contig_ST67	ST67		0.93	0.98	0.99	0.97	0.99	0.6	0.27	0	0	0.14	0.68	0.59	0.74	0.3	0.38	0	0	0.1	0	0	0.04	0	0	0	0	0.15	0	0	0.08	0	0	0.12	0	0.31	0.3	0.23	0.29	0.34	0	0	0.15	0.19	0.1	0	0	0	0.04
GCA_002301525.1_Clostridioides_difficile_5550-AH-ST67_Contig_ST67	ST67		0.93	1	1	1	1	0.6	0.27	0	0	0.14	0.68	0.59	0.74	0.3	0.38	0	0	0.1	0	0	0	0	0	0	0	0.15	0	0	0.08	0	0	0.12	0	0.31	0.3	0.23	0.29	0.34	0	0	0.15	0.19	0.1	0	0	0	0.04
GCA_002301715.1_Clostridioides_difficile_6583-AH-ST67_Contig_ST67	ST67		0.93	0.98	0.99	0.97	0.99	0.6	0.27	0	0	0.14	0.68	0.59	0.74	0.3	0.38	0	0	0.1	0	0	0.04	0	0	0	0	0.15	0	0	0.08	0	0	0.12	0	0.31	0.3	0.23	0.29	0.34	0	0	0.15	0.19	0.1	0	0	0	0.04
GCA_000531385.1_Clostridioides_difficile_E16_Scaffold_ST7	ST7		0.9	0.98	0.99	0.97	0.99	0.2	0.22	0	0	0.22	0.88	0.87	0.93	0.39	0.42	0	0.66	0.31	0.53	0.49	0.68	0	0	0.79	0.8	0.57	0	0	0.08	0	0	0.12	0	0.28	0.26	0.39	0.29	0.34	0	0.11	0.15	0.19	0.11	0	0.21	0	0.23
GCA_000531715.1_Clostridioides_difficile_T61_Scaffold_ST7	ST7		0.9	0.98	0.99	0.97	0.99	0.11	0.22	0	0.13	0.22	0.88	0.87	0.93	0.39	0.42	0	0.66	0.31	0.53	0.49	0.68	0	0	0.79	0.8	0.57	0	0	0.08	0	0	0.12	0	0.28	0.26	0.39	0.29	0.34	0	0.11	0.15	0.19	0.1	0	0.21	0	0.23
GCA_900164095.1_Clostridioides_difficile_VRECD0165_Contig_ST7	ST7		0.9	0.98	0.99	0.97	0.99	0.21	0.22	0	0.13	0.22	0.88	0.87	0.93	0.39	0.42	0	0.66	0.31	0.53	0.49	0.68	0	0	0.79	0.8	0.57	0	0	0.08	0	0.05	0.12	0	0.28	0.26	0.39	0.29	0.34	0	0.11	0.15	0.19	0.1	0	0.21	0	0.23
GCA_000449145.2_Clostridioides_difficile_CD51_Contig_ST8	ST8		0.9	0.98	0.99	0.97	0.99	0.57	0.07	0	0.13	0.16	0.68	0.58	0.74	0.3	0.38	0	0	0.1	0	0	0	0	0	0	0	0.15	0	0	0.08	0	0	0.12	0.21	0.09	0.07	0.3	0.29	0.34	0	0	0.15	0.19	0.1	0	0	0	0
GCA_000449345.2_Clostridioides_difficile_CD133_Contig_ST8	ST8		0.9	0.98	0.99	0.97	0.99	0.11	0.07	0	0.13	0.14	0.68	0.58	0.74	0.3	0.38	0	0	0.1	0	0	0	0	0	0	0	0.15	0	0	0.08	0	0	0.12	0	0.09	0.07	0.3	0.29	0.34	0	0	0.15	0.19	0.11	0	0	0	0
GCA_000449505.2_Clostridioides_difficile_CD170_Contig_ST8	ST8		0.9	0.98	0.99	0.97	0.99	0.19	0.07	0	0.13	0.14	0.68	0.58	0.74	0.3	0.38	0	0	0.1	0	0	0	0	0	0	0	0.15	0	0	0.09	0	0	0.12	0	0.09	0.07	0.3	0.29	0.34	0	0	0.15	0.19	0.11	0	0	0	0
GCA_000449765.2_Clostridioides_difficile_655_Contig_ST8	ST8		0.9	0.98	0.99	0.97	0.99	0.57	0.07	0	0.13	0.17	0.68	0.58	0.74	0.3	0.38	0	0	0.1	0	0	0	0	0	0	0	0.15	0	0	0.08	0	0	0.12	0.21	0.09	0.07	0.3	0.29	0.34	0	0	0.15	0.19	0.1	0	0	0	0.05
GCA_000450065.2_Clostridioides_difficile_DA00132_Contig_ST8	ST8		0.9	0.98	0.99	0.97	0.99	0.11	0.07	0	0.13	0.14	0.68	0.58	0.74	0.3	0.38	0	0	0.1	0	0	0	0	0	0	0	0.15	0	0	0.09	0	0	0.12	0	0.09	0.07	0.3	0.29	0.34	0	0	0.15	0.19	0.1	0	0	0	0
GCA_000450465.2_Clostridioides_difficile_DA00212_Contig_ST8	ST8		0.9	0.98	0.99	0.97	0.99	0.57	0.06	0	0.13	0.16	0.68	0.58	0.74	0.3	0.38	0	0	0.1	0	0	0	0	0	0	0	0.15	0	0	0.08	0	0	0.12	0.21	0.09	0.05	0.39	0.29	0.34	0	0	0.15	0.19	0.1	0	0	0	0
GCA_000450605.2_Clostridioides_difficile_DA00246_Contig_ST8	ST8		0.9	0.98	0.99	0.97	0.99	0.11	0.07	0	0.13	0.14	0.68	0.58	0.74	0.3	0.38	0	0	0.1	0	0	0	0	0	0	0	0.15	0	0	0.08	0	0	0.12	0	0.09	0.07	0.35	0.29	0.34	0	0	0.15	0.19	0.1	0	0	0	0
GCA_000450825.2_Clostridioides_difficile_Y10_Contig_ST8	ST8		0.9	0.98	0.99	0.97	0.99	0.11	0.07	0	0.13	0.14	0.68	0.58	0.74	0.3	0.31	0	0	0.1	0	0	0	0	0	0	0	0.15	0	0	0.08	0	0	0.12	0	0.09	0.07	0.3	0.29	0.34	0	0	0.15	0.19	0.1	0	0	0	0.05
GCA_000450865.2_Clostridioides_difficile_Y41_Contig_ST8	ST8		0.9	0.98	0.99	0.97	0.99	0.11	0.07	0	0.13	0.14	0.68	0.58	0.74	0.3	0.38	0	0	0.1	0	0	0	0	0	0	0	0.15	0	0	0.09	0	0	0.12	0	0.09	0.07	0.3	0.29	0.34	0	0	0.15	0.19	0.1	0	0	0	0.05
GCA_000450885.2_Clostridioides_difficile_Y155_Contig_ST8	ST8		0.9	0.98	0.99	0.97	0.99	0.57	0.07	0	0.13	0.16	0.68	0.58	0.74	0.3	0.38	0	0	0.1	0	0	0	0	0	0	0	0.15	0	0	0.08	0	0	0.12	0.21	0.09	0.07	0.3	0.29	0.34	0	0	0.15	0.19	0.1	0	0	0	0
GCA_000451405.2_Clostridioides_difficile_Y312_Contig_ST8	ST8		0.9	0.98	0.99	0.97	0.99	0.11	0.07	0	0.13	0.14	0.68	0.58	0.73	0.3	0.38	0	0	0.1	0	0	0	0	0	0	0	0.15	0	0	0.08	0	0	0.12	0	0.09	0.07	0.3	0.29	0.34	0	0	0.15	0.19	0.1	0	0	0	0.05
GCA_000451445.2_Clostridioides_difficile_Y171_Contig_ST8	ST8		0.9	0.98	0.99	0.97	0.99	0.11	0.06	0	0.13	0.14	0.68	0.58	0.74	0.3	0.38	0	0	0.1	0	0	0	0	0	0	0	0.15	0	0	0.09	0	0	0.12	0	0.09	0.07	0.3	0.29	0.34	0	0	0.15	0.19	0.1	0	0	0	0
GCA_000451685.2_Clostridioides_difficile_P15_Contig_ST8	ST8		0.9	0.98	0.99	0.97	0.99	0.11	0.07	0	0.13	0.14	0.68	0.58	0.74	0.3	0.38	0	0	0.1	0	0	0	0	0	0	0	0.15	0	0	0.08	0	0	0.12	0	0.09	0.07	0.24	0.29	0.34	0	0	0.15	0.19	0.1	0	0	0	0
GCA_000451845.2_Clostridioides_difficile_P36_Contig_ST8	ST8		0.9	0.98	0.99	0.97	0.99	0.57	0.07	0	0.13	0.16	0.68	0.58	0.62	0.3	0.38	0	0	0.1	0	0	0	0	0	0	0	0.15	0	0	0.08	0	0	0.12	0.21	0.09	0.07	0.3	0.29	0.34	0	0	0.15	0.19	0.1	0	0	0	0
GCA_001972005.1_Clostridioides_difficile_20120020_Contig_ST8	ST8		0.9	0.98	0.99	0.97	0.99	0.11	0.07	0	0.13	0.14	0.68	0.58	0.74	0.3	0.38	0	0	0.1	0	0	0	0	0	0	0	0.15	0	0	0.08	0	0	0.12	0	0.09	0.07	0.3	0.29	0.34	0	0	0.15	0.19	0.1	0	0	0	0.05
GCA_002301785.1_Clostridioides_difficile_6588-G-ST8_Contig_ST8	ST8		0.9	0.98	0.99	0.97	0.99	0.11	0.07	0	0.13	0.14	0.68	0.58	0.74	0.3	0.38	0	0	0.1	0	0	0	0	0	0	0	0.15	0	0	0.08	0	0	0.12	0	0.09	0.07	0.3	0.29	0.34	0	0	0.15	0.19	0.1	0	0	0	0
GCA_002301845.1_Clostridioides_difficile_6594-G-ST8_Contig_ST8	ST8		0.9	0.98	0.99	0.97	0.99	0.11	0.07	0	0.13	0.14	0.68	0.58	0.74	0.3	0.38	0	0	0.1	0	0	0	0	0	0.1	0	0.15	0	0	0.08	0	0	0.12	0	0.09	0.07	0.3	0.29	0.34	0	0	0.15	0.19	0.1	0	0	0	0
GCA_002302165.1_Clostridioides_difficile_7459-G-ST8_Contig_ST8	ST8		0.9	0.98	0.99	0.97	0.99	0.11	0.07	0	0.13	0.14	0.68	0.58	0.74	0.3	0.38	0	0	0.1	0	0	0	0	0	0	0	0.15	0	0	0.08	0	0	0.12	0	0.09	0.07	0.35	0.29	0.34	0	0	0.15	0.19	0.1	0	0	0	0
GCA_900007665.1_Clostridioides_difficile_VL_0272_Contig_ST8	ST8		0.9	0.98	0.99	0.97	0.99	0.11	0.07	0	0.13	0.14	0.68	0.58	0.74	0.3	0.38	0	0	0.1	0	0	0	0	0	0	0	0.15	0	0	0.08	0	0	0.12	0	0.09	0.07	0.3	0.29	0.34	0	0	0.15	0.19	0.1	0	0	0	0
GCA_900007675.1_Clostridioides_difficile_VL_0273_Contig_ST8	ST8		0.9	0.98	0.99	0.97	0.74	0.11	0.07	0	0.13	0.14	0.51	0.58	0.74	0.3	0.38	0	0	0.1	0	0	0	0	0	0	0	0.15	0	0	0.08	0	0	0.12	0	0.09	0.07	0.3	0.29	0.34	0	0	0.15	0.19	0.1	0	0	0	0.05
GCA_900008495.1_Clostridioides_difficile_VL_0297_Contig_ST8	ST8		0.9	0.98	0.99	0.97	0.99	0.11	0.07	0	0.13	0.14	0.68	0.58	0.74	0.3	0.38	0	0	0.1	0	0	0	0	0	0	0	0.15	0	0	0.08	0	0	0.12	0	0.09	0.07	0.3	0.29	0.34	0	0	0.15	0.19	0.1	0	0	0	0.05
GCA_900010125.1_Clostridioides_difficile_VL_0163_Contig_ST8	ST8		0.9	0.98	0.99	0.97	0.99	0.18	0.07	0	0.13	0.14	0.68	0.58	0.74	0.3	0.38	0	0	0.1	0	0	0	0	0	0	0	0.15	0	0	0.08	0	0	0.12	0	0.09	0.07	0.3	0.29	0.34	0	0	0.15	0.19	0.1	0	0	0	0
GCA_900010135.1_Clostridioides_difficile_VL_0298_Contig_ST8	ST8		0.9	0.98	0.99	0.97	0.99	0.21	0.07	0	0.13	0.14	0.68	0.58	0.74	0.3	0.38	0	0	0.1	0	0	0	0	0	0	0	0.15	0	0	0.08	0	0	0.12	0	0.09	0.07	0.3	0.29	0.34	0	0	0.15	0.19	0.11	0	0	0	0.05
GCA_900012735.1_Clostridioides_difficile_VL_0178_Contig_ST8	ST8		0.9	0.98	0.99	0.97	0.99	0.57	0.07	0	0.13	0.24	0.68	0.58	0.74	0.3	0.38	0	0	0.1	0	0	0	0	0	0	0	0.15	0	0	0.08	0	0	0.12	0.21	0.09	0.07	0.33	0.29	0.34	0	0	0.15	0.19	0.11	0.14	0	0	0.05
GCA_900013615.1_Clostridioides_difficile_VL_0235_Contig_ST8	ST8		0.9	0.98	0.99	0.97	0.99	0.11	0.07	0	0.13	0.14	0.68	0.58	0.74	0.3	0.38	0	0	0.1	0	0	0	0	0	0	0	0.15	0	0	0.09	0	0	0.12	0	0.09	0.07	0.3	0.29	0.34	0	0	0.15	0.19	0.1	0	0	0	0.05
GCA_900013915.1_Clostridioides_difficile_VL_0308_Contig_ST8	ST8		0.9	0.98	0.99	0.97	0.99	0.57	0.07	0	0.13	0.16	0.68	0.58	0.74	0.3	0.38	0	0	0.1	0	0	0	0	0	0	0	0.15	0	0	0.08	0	0	0.12	0.21	0.09	0.07	0.3	0.29	0.34	0	0	0.15	0.19	0.11	0	0	0	0
GCA_900014065.1_Clostridioides_difficile_VL_0339_Contig_ST8	ST8		0.9	0.98	0.99	0.97	0.99	0.11	0.07	0	0.13	0.14	0.68	0.58	0.74	0.3	0.38	0	0	0.1	0	0	0	0	0	0	0	0.15	0	0	0.08	0	0	0.12	0	0.09	0.07	0.3	0.29	0.34	0	0	0.15	0.19	0.1	0	0	0	0
GCA_900014795.1_Clostridioides_difficile_VL_0465_Contig_ST8	ST8		0.9	0.98	0.99	0.97	0.99	0.57	0.07	0	0.13	0.24	0.68	0.58	0.74	0.3	0.38	0	0	0.1	0	0	0	0	0	0	0	0.15	0	0	0.09	0	0	0.12	0.21	0.09	0.07	0.33	0.29	0.34	0	0	0.15	0.19	0.1	0	0	0	0
GCA_900015535.1_Clostridioides_difficile_VL_0010_Contig_ST8	ST8		0.9	0.98	0.99	0.97	0.99	0.11	0.07	0	0.13	0.14	0.68	0.58	0.74	0.3	0.38	0	0	0.1	0	0	0	0	0	0	0	0.15	0	0	0.08	0	0	0.12	0	0.09	0.07	0.3	0.29	0.34	0	0	0.15	0.19	0.1	0	0	0	0
GCA_900015565.1_Clostridioides_difficile_VL_0023_Contig_ST8	ST8		0.9	0.98	0.99	0.97	0.99	0.13	0.07	0	0.13	0.14	0.68	0.58	0.74	0.3	0.38	0	0	0.1	0	0	0	0	0	0	0	0.15	0	0	0.08	0	0	0.12	0	0.09	0.07	0.3	0.29	0.34	0	0	0.15	0.19	0.1	0	0	0	0.05
GCA_900165055.1_Clostridioides_difficile_VRECD0115_Contig_ST8	ST8		0.9	0.98	0.99	0.97	0.99	0.11	0.07	0	0.13	0.17	0.68	0.58	0.74	0.3	0.38	0	0	0.1	0	0	0	0	0	0	0	0.15	0	0	0.08	0	0	0.12	0	0.09	0.07	0.35	0.29	0.34	0	0	0.15	0.19	0.1	0	0	0	0
GCA_000450365.2_Clostridioides_difficile_DA00196_Contig_ST83	ST83		0.9	0.98	0.99	0.97	0.99	0.39	0.08	0	0.13	0.25	0.68	0.58	0.74	0.3	0.38	0	0	0.1	0.13	0	0	0	0	0	0	0.15	0	0	0.09	0	0	0.12	0.21	0.09	0.09	0.44	0.29	0.34	0	0.11	0.15	0.19	0.1	0	0	0	0
GCA_000451385.2_Clostridioides_difficile_Y270_Contig_ST83	ST83		0.9	0.98	0.99	0.97	0.99	0.39	0.35	0	0.13	0.26	0.88	0.86	0.94	0.96	0.94	0.83	0	0.1	0.13	0	0	0	0	0	0	0.15	0	0	0.09	0	0	0.12	0.21	0.31	0.4	0.44	0.29	0.34	0	0.11	0.15	0.19	0.1	0	0	0	0
GCA_000451505.2_Clostridioides_difficile_Y343_Contig_ST83	ST83		0.9	0.98	0.99	0.97	0.99	0.35	0.07	0	0.13	0.14	0.68	0.58	0.74	0.3	0.38	0	0	0.1	0	0	0	0	0	0	0	0.15	0	0	0.09	0	0	0.12	0.21	0.09	0.07	0.36	0.29	0.34	0	0.11	0.15	0.19	0.1	0	0	0	0
GCA_000451965.2_Clostridioides_difficile_P50_Contig_ST83	ST83		0.9	0.98	0.99	0.97	0.99	0.39	0.08	0	0.13	0.25	0.68	0.58	0.74	0.3	0.38	0	0	0.1	0.13	0	0	0	0	0	0	0.15	0	0	0.09	0	0	0.12	0.21	0.09	0.09	0.44	0.29	0.34	0	0.11	0.15	0.19	0.1	0	0	0	0
GCA_900008365.1_Clostridioides_difficile_VL_0067_Contig_ST83	ST83		0.9	0.98	0.99	0.97	0.99	0.39	0.24	0	0.13	0.25	0.68	0.58	0.74	0.3	0.38	0	0	0.1	0.13	0	0	0	0	0.42	0	0.15	0	0	0.11	0	0	0.12	0.21	0.25	0.29	0.44	0.29	0.34	0	0.11	0.15	0.19	0.1	0.21	0	0	0
GCA_900011645.1_Clostridioides_difficile_VL_0150_Contig_ST83	ST83		0.9	0.98	0.99	0.97	0.99	0.35	0.07	0	0	0.25	0.68	0.49	0.74	0.3	0.38	0	0	0.1	0	0	0	0	0	0.42	0	0.15	0	0	0.11	0	0	0.12	0.21	0.09	0.07	0.44	0.29	0.34	0	0.11	0.15	0.19	0.1	0.21	0	0	0
GCA_900012935.1_Clostridioides_difficile_VL_0210_Contig_ST83	ST83		0.9	0.98	0.99	0.97	0.99	0.35	0.26	0.33	0	0.26	0.68	0.58	0.74	0.3	0.38	0	0	0.1	0	0.15	0	0	0	0.42	0	0.15	0	0.41	0.11	0	0.05	0.12	0.21	0.27	0.31	0.44	0.29	0.34	0	0.43	0.15	0.19	0.1	0.21	0	0	0
GCA_900014205.1_Clostridioides_difficile_VL_0452_Contig_ST83	ST83		0.9	0.98	0.99	0.97	0.99	0.39	0.24	0	0.13	0.25	0.68	0.58	0.74	0.3	0.38	0	0	0.1	0.13	0	0	0	0	0.42	0	0.15	0	0	0.11	0	0	0.12	0.21	0.25	0.29	0.44	0.29	0.34	0	0.11	0.15	0.19	0.1	0.21	0	0	0
GCA_900014445.1_Clostridioides_difficile_VL_0364_Contig_ST83	ST83		0.9	0.98	0.99	0.97	0.99	0.39	0.24	0	0	0.25	0.68	0.58	0.74	0.3	0.38	0	0	0.1	0.13	0	0	0	0	0.42	0	0.15	0	0	0.11	0	0	0.12	0.21	0.25	0.29	0.44	0.29	0.34	0	0.11	0.15	0.19	0.1	0.21	0	0	0
GCA_900014525.1_Clostridioides_difficile_VL_0384_Contig_ST83	ST83		0.9	0.84	0.84	0.97	0.99	0.39	0.08	0	0.13	0.25	0.51	0.58	0.74	0.3	0.38	0	0	0.1	0.13	0	0	0	0	0	0	0.15	0	0	0.09	0	0	0.12	0.21	0.09	0.09	0.44	0.29	0.34	0	0.11	0.15	0.19	0.1	0	0	0	0
GCA_000210415.1_Clostridioides_difficile_CF5_Complete_Genome_ST86	ST86		0.67	0.07	0.15	0	0.18	0.36	0.07	0	0	0.16	0.67	0.59	0.74	0.3	0.37	0	0	0.22	0.19	0	0	0	0	0	0	0.15	0	0	0.09	0	0	0.12	0.21	0.09	0.07	0.21	0.29	0.34	0.92	0	0.15	0.19	0.11	0	0	0	0.04
GCA_002301405.1_Clostridioides_difficile_5537-D-ST9_Contig_ST9	ST9		0.37	0.99	0.99	0.97	0.99	0.25	0.06	0	0.13	0.25	0.68	0.58	0.74	0.52	0.58	0	0	0.29	0.31	0.16	0.06	0	0	0.46	0	0.15	0	0	0.08	0	0.05	0.12	0.21	0.09	0.04	0.39	0.29	0.34	0	0	0.15	0.19	0.1	0	0	0	0.06
GCA_900013055.1_Clostridioides_difficile_VL_0224_Contig_ST9	ST9		0.37	0.99	0.99	0.97	0.99	0.15	0.06	0	0.13	0.25	0.68	0.58	0.74	0.52	0.58	0	0	0.29	0.31	0	0.06	0	0	0.46	0	0.15	0	0	0.08	0	0	0.12	0.21	0.09	0.04	0.39	0.29	0.34	0	0	0.15	0.19	0.1	0	0	0	0.06
GCA_900015605.1_Clostridioides_difficile_VL_0154_Contig_ST9	ST9		0.37	0.99	0.99	0.97	0.99	0.15	0.06	0	0.13	0.25	0.68	0.58	0.74	0.52	0.58	0	0	0.29	0.31	0	0.06	0	0	0.46	0	0.15	0	0	0.08	0	0.05	0.12	0.21	0.09	0.04	0.39	0.29	0.34	0	0	0.15	0.19	0.1	0	0	0	0.06
GCA_002302755.1_Clostridioides_difficile_7468-NonSp-ST97_Contig_ST97	ST97		0.73	1	1	1	1	0.55	0.27	0	0	0.25	0.68	0.58	0.74	0.3	0.38	0	0	0.1	0	0	0.04	0	0	0	0	0.15	0	0	0.08	0	0	0.12	0	0.31	0.3	0.32	0.29	0.34	0	0	0.15	0.19	0.1	0	0	0	0
GCA_000448785.2_Clostridioides_difficile_CD22_Contig_STX	STX		0.36	0.98	0.99	0.97	0.98	0.55	0.07	0	0	0.14	0.68	0.58	0.74	0.3	0.37	0	0	0.1	0	0	0.03	0	0	0	0	0.14	0	0	0.08	0	0	0.12	0	0.09	0.07	0.3	0.29	0.34	0	0	0.15	0.19	0.1	0	0	0	0
GCA_000448825.2_Clostridioides_difficile_CD3_Contig_STX	STX		0.36	0.98	0.99	0.97	0.99	0.35	0.07	0	0.13	0.25	0.68	0.58	0.74	0.3	0.38	0	0	0.1	0	0	0	0	0	0	0	0.15	0	0	0.08	0	0	0.12	0.21	0.09	0.07	0.31	0.29	0.34	0	0	0.15	0.19	0.1	0	0	0	0
GCA_000448845.2_Clostridioides_difficile_CD8_Contig_STX	STX		0.9	0.98	0.99	0.97	0.99	0.36	0.07	0	0.13	0.23	0.89	0.87	0.95	0.25	0.3	0.44	0	0.1	0	0	0	0	0	0	0	0.15	0	0	0.09	0	0	0.12	0	0.09	0.07	0.39	0.29	0.34	0	0	0.15	0.19	0.1	0	0	0	0.05
GCA_000448945.2_Clostridioides_difficile_CD39_Contig_STX	STX		0.9	0.99	0.99	0.97	0.99	0.55	0.07	0	0.13	0.24	0.68	0.58	0.74	0.3	0.37	0	0	0.1	0	0	0	0	0	0	0	0.15	0	0	0.08	0	0	0.12	0	0.09	0.07	0.39	0.29	0.34	0	0.11	0.15	0.2	0.1	0	0	0	0
GCA_000449065.2_Clostridioides_difficile_CD45_Contig_STX	STX		0.9	0.99	0.99	0.97	0.99	0.56	0.07	0	0.13	0.15	0.68	0.58	0.74	0.19	0.38	0	0	0.1	0	0.19	0.03	0	0	0.48	0	0.15	0	0	0.15	0	0	0.12	0	0.09	0.07	0.39	0.29	0.34	0	0.11	0.15	0.2	0.27	0	0	0	0
GCA_000449165.2_Clostridioides_difficile_CD68_Contig_STX	STX		0.9	0.98	0.99	0.97	0.99	0.11	0.07	0	0.13	0.14	0.68	0.58	0.62	0.3	0.38	0	0	0.1	0	0	0	0	0	0	0	0.15	0	0	0.08	0	0	0.12	0	0.09	0.07	0.3	0.29	0.34	0	0	0.15	0.19	0.1	0	0	0	0
GCA_000449285.1_Clostridioides_difficile_CD129_Contig_STX	STX		0.18	0.99	0.99	0.97	0.98	0.19	0.07	0	0.13	0.25	0.68	0.58	0.74	0.3	0.38	0	0	0.1	0	0	0	0	0	0	0	0.15	0	0	0.09	0	0	0.12	0	0.09	0.07	0.39	0.21	0.34	0.32	0	0.15	0.2	0.11	0	0	0	0
GCA_000449325.2_Clostridioides_difficile_CD132_Contig_STX	STX		0.9	0.99	0.99	0.97	0.99	0.11	0.07	0	0.13	0.25	0.68	0.48	0.62	0.3	0.38	0	0	0.1	0	0	0	0	0	0	0	0.15	0	0	0.08	0	0	0.12	0	0.09	0.07	0.32	0.29	0.34	0.92	0	0.15	0.2	0.1	0	0	0	0
GCA_000449405.2_Clostridioides_difficile_CD159_Contig_STX	STX		0.9	0.99	0.99	0.97	0.99	0.12	0.07	0	0.13	0.25	0.67	0.58	0.74	0.3	0.38	0	0	0.1	0	0	0	0	0	0	0	0.15	0	0	0.08	0	0	0.12	0	0.09	0.07	0.32	0.29	0.34	0.92	0	0.15	0.2	0.1	0	0	0	0
GCA_000449525.2_Clostridioides_difficile_CD175_Contig_STX	STX		0.32	0.07	0.15	0	0.18	0.61	0.27	0	0	0.14	0.67	0.59	0.73	0.3	0.37	0	0	0.22	0.19	0	0	0	0	0	0	0.15	0	0	0.09	0	0	0.12	0.21	0.31	0.3	0.21	0.29	0.34	0.92	0	0.15	0.19	0.11	0	0	0	0.04
GCA_000449605.2_Clostridioides_difficile_CD196_Contig_STX	STX		0.9	0.07	0.15	0	0.18	0.25	0.07	0	0.13	0.15	0.68	0.58	0.74	0.3	0.38	0	0	0.1	0	0	0	0	0	0.1	0	0.15	0	0	0.08	0	0	0.12	0	0.09	0.07	0.21	0.29	0.34	0	0	0.15	0.2	0.1	0	0	0	0
GCA_000449645.2_Clostridioides_difficile_CD200_Contig_STX	STX		0.9	0.99	0.99	0.97	0.99	0.11	0.07	0	0.13	0.14	0.68	0.58	0.74	0.3	0.38	0	0	0.1	0	0	0	0	0	0	0	0.15	0	0	0.09	0	0	0.12	0	0.1	0.07	0.33	0.29	0.34	0.93	0	0.15	0.19	0.11	0	0	0	0
GCA_000449805.2_Clostridioides_difficile_840_Contig_STX	STX		0.9	0.99	0.99	0.97	0.99	0.55	0.07	0	0.13	0.24	0.51	0.33	0.63	0.14	0.18	0	0	0.1	0	0	0	0	0	0	0	0.15	0	0	0.08	0	0	0.12	0	0.09	0.07	0.31	0.29	0.34	0	0	0.15	0.2	0.1	0	0	0	0
GCA_000449825.2_Clostridioides_difficile_842_Contig_STX	STX		0.9	0.99	0.99	0.97	0.99	0.55	0.07	0	0.13	0.2	0.68	0.58	0.74	0.3	0.37	0	0	0.1	0	0	0	0	0	0	0	0.15	0	0	0.08	0	0	0.12	0	0.09	0.07	0.21	0.29	0.34	0	0.11	0.15	0.2	0.1	0	0	0	0
GCA_000449845.1_Clostridioides_difficile_6041_Contig_STX	STX		0.36	0.99	0.99	0.97	0.98	0.19	0.07	0	0.13	0.14	0.68	0.58	0.74	0.3	0.38	0	0	0.1	0	0	0	0	0	0	0	0.15	0	0	0.09	0	0	0.12	0	0.09	0.07	0.36	0.29	0.34	0.32	0	0.15	0.2	0.1	0	0	0	0
GCA_000449865.2_Clostridioides_difficile_6042_Contig_STX	STX		0.9	0.98	0.99	0.97	0.99	0.11	0.07	0	0.13	0.14	0.68	0.58	0.74	0.3	0.38	0	0	0.1	0	0	0	0	0	0	0	0.15	0	0	0.08	0	0.05	0.12	0	0.09	0.07	0.3	0.29	0.34	0	0	0.15	0.19	0.1	0	0	0	0
GCA_000449885.2_Clostridioides_difficile_6057_Contig_STX	STX		0.9	0.98	0.99	0.97	0.99	0.11	0.07	0	0.13	0.14	0.68	0.48	0.62	0.3	0.38	0	0	0.1	0	0	0	0	0	0	0	0.15	0	0	0.08	0	0	0.12	0	0.09	0.07	0.3	0.29	0.34	0	0	0.15	0.19	0.1	0	0	0	0
GCA_000449985.2_Clostridioides_difficile_DA00126_Contig_STX	STX		0.36	0.98	0.99	0.97	0.99	0.35	0.07	0	0.13	0.25	0.68	0.58	0.74	0.3	0.38	0	0	0.1	0	0	0	0	0	0	0	0.15	0	0	0.08	0	0	0.12	0.21	0.09	0.07	0.31	0.29	0.34	0	0	0.15	0.19	0.1	0	0	0	0.04
GCA_000450025.2_Clostridioides_difficile_DA00129_Contig_STX	STX		0.9	0.99	0.99	0.97	0.99	0.55	0.07	0	0.13	0.16	0.68	0.58	0.74	0.3	0.38	0.1	0	0.1	0	0	0	0	0	0	0	0.15	0	0	0.08	0	0	0.12	0.21	0.09	0.07	0.31	0.29	0.34	0	0	0.15	0.19	0.1	0	0	0	0
GCA_000450145.2_Clostridioides_difficile_DA00145_Contig_STX	STX		0.73	0.99	1	1	1	0.58	0.27	0	0	0.15	0.68	0.58	0.74	0.3	0.38	0	0	0.1	0	0	0	0	0	0	0	0.15	0	0	0.08	0	0	0.12	0.18	0.31	0.3	0.21	0.29	0.34	0	0	0.15	0.19	0.1	0	0	0	0
GCA_000450165.2_Clostridioides_difficile_DA00149_Contig_STX	STX		0.9	0.99	0.99	0.97	0.99	0.11	0.06	0	0.13	0.24	0.68	0.58	0.74	0.3	0.37	0	0	0.1	0	0	0	0	0	0.1	0	0.15	0	0	0.08	0	0	0.12	0	0.09	0.05	0.39	0.29	0.34	0	0.11	0.15	0.2	0.1	0	0	0	0
GCA_000450185.2_Clostridioides_difficile_DA00154_Contig_STX	STX		0.9	0.99	0.99	0.97	0.99	0.12	0.26	0.45	0.13	0.25	0.67	0.58	0.74	0.3	0.38	0	0	0.28	0.3	0	0.18	0	0	0	0	0.15	0	0.3	0.08	0	0	0.12	0	0.25	0.29	0.32	0.29	0.34	0.92	0.34	0.29	0.62	0.1	0.22	0.21	0	0.1
GCA_000450205.2_Clostridioides_difficile_DA00160_Contig_STX	STX		0.9	0.99	0.99	0.97	0.99	0.12	0.26	0.45	0.13	0.25	0.67	0.58	0.73	0.3	0.38	0	0	0.28	0.3	0	0.18	0	0	0	0	0.15	0	0.3	0.08	0	0	0.12	0	0.25	0.29	0.32	0.29	0.34	0.92	0.34	0.29	0.62	0.1	0.22	0.21	0	0.1
GCA_000450225.2_Clostridioides_difficile_DA00165_Contig_STX	STX		0.36	0.98	0.99	0.97	0.99	0.35	0.07	0	0.13	0.24	0.68	0.58	0.74	0.3	0.38	0	0	0.1	0	0	0	0	0	0	0	0.15	0	0	0.08	0	0	0.12	0.21	0.08	0.07	0.31	0.15	0.34	0	0	0.15	0.19	0.1	0	0	0	0
GCA_000450305.2_Clostridioides_difficile_DA00191_Contig_STX	STX		0.36	0.98	0.99	0.97	0.99	0.35	0.07	0	0.13	0.25	0.68	0.58	0.74	0.3	0.38	0	0	0.1	0	0	0	0	0	0	0	0.15	0	0	0.08	0	0	0.12	0.21	0.09	0.07	0.31	0.29	0.34	0	0	0.15	0.19	0.1	0	0	0	0.04
GCA_000450325.2_Clostridioides_difficile_DA00193_Contig_STX	STX		0.9	0.99	0.99	0.97	0.99	0.12	0.07	0	0.13	0.25	0.67	0.58	0.74	0.3	0.38	0	0	0.1	0	0	0.18	0	0	0	0	0.15	0	0	0.08	0	0	0.12	0	0.09	0.07	0.32	0.29	0.34	0.92	0	0.29	0.62	0.1	0	0.21	0	0.1
GCA_000450425.2_Clostridioides_difficile_DA00210_Contig_STX	STX		0.9	0.99	0.99	0.97	0.99	0.55	0.07	0	0.13	0.24	0.68	0.58	0.74	0.3	0.38	0	0	0.1	0	0	0	0	0	0	0	0.15	0	0	0.08	0	0	0.12	0	0.09	0.07	0.39	0.29	0.34	0	0.11	0.15	0.2	0.1	0	0	0	0
GCA_000450505.2_Clostridioides_difficile_DA00216_Contig_STX	STX		0.9	0.99	0.99	0.97	0.99	0.18	0.07	0	0.13	0.24	0.68	0.58	0.74	0.3	0.37	0	0	0.1	0	0	0	0	0	0	0	0.15	0	0	0.08	0	0	0.12	0	0.09	0.07	0.39	0.29	0.34	0	0.11	0.15	0.2	0.1	0	0	0	0
GCA_000450685.2_Clostridioides_difficile_DA00310_Contig_STX	STX		0.9	0.99	0.99	0.97	0.99	0.11	0.07	0	0.13	0.25	0.67	0.58	0.74	0.3	0.38	0	0	0.1	0	0	0	0	0	0.1	0	0.15	0	0	0.08	0	0	0.12	0	0.09	0.07	0.39	0.29	0.34	0.92	0	0.22	0.2	0.1	0.22	0	0	0
GCA_000450765.2_Clostridioides_difficile_F253_Contig_STX	STX		0.73	1	1	1	1	1	0.29	0.43	0	0.15	0.68	0.59	0.74	0.3	0.38	0	0	0.1	0	0	0	0	0	0	0	0.15	0	1	1	1	0.99	1	1	1	1	1	1	1	1	0.59	0.15	0.19	0.44	0	0	0	0
GCA_000451165.2_Clostridioides_difficile_Y202_Contig_STX	STX		0.9	0.99	0.99	0.97	0.99	0.55	0.07	0	0.13	0.24	0.68	0.48	0.63	0.14	0.18	0	0	0.1	0	0	0	0	0	0.1	0	0.15	0	0	0.08	0	0	0.12	0	0.09	0.07	0.39	0.29	0.34	0	0	0.15	0.2	0.1	0	0	0	0
GCA_000451185.2_Clostridioides_difficile_Y266_Contig_STX	STX		0.9	0.07	0.15	0	0.18	0.11	0.06	0	0.13	0.29	0.88	0.87	0.93	0.39	0.42	0	0	0.1	0	0	0.05	0	0	0.44	0	0.15	0	0	0.08	0	0	0.12	0	0.11	0.07	0.41	0.29	0.34	0.92	0.11	0.15	0.2	0.1	0	0	0	0
GCA_000451225.1_Clostridioides_difficile_CD92_Contig_STX	STX		0.36	0.99	0.99	0.97	0.98	0.19	0.07	0	0.13	0.25	0.68	0.58	0.74	0.3	0.38	0	0	0.1	0	0	0	0	0	0	0	0.15	0	0	0.09	0	0	0.12	0	0.09	0.07	0.39	0.21	0.34	0.32	0	0.15	0.2	0.1	0	0	0	0
GCA_000451265.2_Clostridioides_difficile_Y215_Contig_STX	STX		0.36	0.98	0.99	0.97	0.99	0.35	0.07	0	0.13	0.25	0.68	0.58	0.74	0.3	0.38	0	0	0.1	0	0	0	0	0	0	0	0.15	0	0	0.08	0	0	0.12	0.21	0.09	0.07	0.31	0.29	0.34	0	0	0.15	0.19	0.1	0	0	0	0
GCA_000451325.2_Clostridioides_difficile_CD127_Contig_STX	STX		0.9	0.99	0.99	0.97	0.99	0.55	0.07	0	0.13	0.16	0.5	0.48	0.62	0.14	0.18	0	0	0.1	0	0	0	0	0	0.1	0	0.15	0	0	0.08	0	0	0.12	0	0.09	0.07	0.39	0.29	0.34	0	0	0.15	0.2	0.11	0	0	0	0
GCA_000451345.1_Clostridioides_difficile_DA00305_Contig_STX	STX		0.35	0.99	0.99	0.97	0.98	0.19	0.07	0	0.13	0.14	0.68	0.58	0.74	0.3	0.38	0	0	0.1	0	0	0	0	0	0.19	0	0.15	0	0	0.09	0	0	0.12	0	0.09	0.07	0.39	0.21	0.34	0.32	0	0.15	0.2	0.1	0	0	0	0
GCA_000451365.2_Clostridioides_difficile_Y165_Contig_STX	STX		0.9	0.99	0.99	0.97	0.99	0.55	0.07	0	0.13	0.24	0.68	0.58	0.74	0.3	0.38	0	0	0.1	0	0	0	0	0	0	0	0.15	0	0	0.08	0	0	0.12	0	0.09	0.07	0.39	0.29	0.34	0	0.11	0.15	0.2	0.11	0	0	0	0
GCA_000451485.2_Clostridioides_difficile_Y307_Contig_STX	STX		0.9	0.98	0.99	0.97	0.98	0.11	0.07	0	0.13	0.14	0.68	0.58	0.73	0.3	0.38	0	0	0.1	0	0	0	0	0	0	0	0.15	0	0	0.08	0	0	0.12	0	0.09	0.07	0.3	0.29	0.34	0	0	0.15	0.19	0.1	0	0	0	0
GCA_000451605.1_Clostridioides_difficile_P7_Contig_STX	STX		0.9	0.98	0.99	0.97	0.99	0.36	0.07	0	0.13	0.14	0.68	0.58	0.74	0.3	0.38	0	0	0.1	0	0.18	0	0	0	0	0	0.15	0	0	0.08	0	0	0.12	0.21	0.09	0.07	0.39	0.29	0.34	0	0	0.15	0.19	0.1	0	0	0	0
GCA_000451645.2_Clostridioides_difficile_P11_Contig_STX	STX		0.9	0.98	0.99	0.97	0.99	0.35	0.07	0	0.13	0.25	0.68	0.58	0.74	0.3	0.38	0	0	0.1	0	0	0	0	0	0	0	0.15	0	0	0.08	0	0	0.12	0.21	0.1	0.07	0.31	0.29	0.34	0	0	0.15	0.19	0.1	0	0	0	0
GCA_000451725.2_Clostridioides_difficile_P20_Contig_STX	STX		0.9	0.99	0.99	0.97	0.99	0.19	0.26	0.46	0.13	0.27	0.68	0.58	0.74	0.3	0.38	0	0.11	0.1	0	0	0	0	0	0.42	0	0.15	0	0.4	0.11	0	0	0.12	0	0.31	0.3	0.36	0.29	0.34	0.92	0.37	0.15	0.2	0.1	0.21	0	0	0
GCA_001010825.1_Clostridioides_difficile_BJ08_Complete_Genome_STX	STX		0.67	0.07	0.15	0	0.18	0.61	0.76	0.43	0	0.25	0.67	0.59	0.74	0.3	0.37	0	0	0.22	0.19	0.19	0.37	0	0	0.68	0.16	0.47	0	0.39	0.39	0	0	0.53	0.66	0.31	0.37	0.44	0.29	0.34	0.92	0.34	0.15	0.19	0.49	0.68	0.53	0.37	0.52
GCA_001447175.1_Clostridioides_difficile_Z31_Complete_Genome_STX	STX		0.88	0.07	0.15	0	0.18	0.61	0.26	0	0	0.28	0.88	0.87	0.93	0.39	0.42	0	0	0.1	0.13	0	0.05	0	0	0.45	0	0.15	0	0	0.4	0	0	0.12	0.21	0.27	0.31	0.44	0.28	0.34	0	0.11	0.15	0.19	0.47	0.21	0	0	0.05
GCA_001896475.1_Clostridioides_difficile_NT1619_Contig_STX	STX		0.9	0.07	0.15	0	0.16	0.12	0.07	0	0.13	0.25	0.68	0.58	0.62	0.3	0.38	0	0	0.1	0	0	0	0	0	0	0	0.15	0	0	0.08	0	0	0.12	0	0.09	0.07	0.35	0.29	0.34	0	0.11	0.15	0.2	0.11	0	0	0	0
GCA_001984465.1_Clostridioides_difficile_LEM1_Complete_Genome_STX	STX		0.9	0.99	0.99	0.97	0.99	0.55	0.07	0	0.13	0.25	0.68	0.58	0.74	0.3	0.37	0	0	0.1	0	0	0	0	0	0	0	0.15	0	0	0.08	0	0	0.12	0	0.08	0.07	0.39	0.29	0.34	0	0.11	0.15	0.2	0.1	0	0	0	0
GCA_002082985.1_Clostridioides_difficile_FDAARGOS_269_Contig_STX	STX		0.9	0.99	0.99	0.79	0.99	0.55	0.07	0	0.13	0.16	0.68	0.58	0.74	0.3	0.38	0	0	0.1	0	0	0	0	0	0	0	0.15	0	0	0.08	0	0	0.12	0	0.09	0.06	0.39	0.29	0.34	0	0.11	0.16	0.2	0.1	0	0	0	0
GCA_002303075.1_Clostridioides_difficile_7496-D-ST9_Contig_STX	STX		0.37	0.99	0.99	0.97	0.99	0.18	0.06	0	0.13	0.25	0.68	0.58	0.74	0.52	0.58	0	0	0.29	0.31	0	0.06	0	0	0.46	0	0.15	0	0	0.08	0	0.05	0.12	0.21	0.09	0.04	0.39	0.29	0.34	0	0	0.15	0.19	0.1	0	0	0	0.06
GCA_900007705.1_Clostridioides_difficile_VL_0368_Contig_STX	STX		0.9	0.07	0.15	0	0.18	0.36	0.07	0	0	0.29	0.88	0.87	0.93	0.39	0.42	0	0	0.1	0	0	0.05	0	0	0.44	0	0.15	0	0	0.08	0	0	0.12	0	0.11	0.07	0.41	0.29	0.34	0.92	0.11	0.15	0.2	0.1	0	0	0	0
GCA_900010415.1_Clostridioides_difficile_VL_0464_Contig_STX	STX		0.9	0.99	0.88	0.97	0.99	0.55	0.3	0	0.13	0.24	0.68	0.58	0.74	0.3	0.37	0	0	0.1	0	0	0	0	0	0.44	0	0.15	0	0	0.08	0	0	0.12	0	0.27	0.74	0.39	0.87	0.34	0	0.11	0.15	0.2	0.1	0	0	0	0.05
GCA_900011895.1_Clostridioides_difficile_VL_0079_Contig_STX	STX		0.37	0.99	0.99	0.97	0.99	0.97	0.07	0	0.13	0.62	0.68	0.58	0.74	0.54	0.52	0	0	0.1	0	0	0.03	0	0	0	0	0.15	0	0	0.08	0	0	0.12	0	0.09	0.07	0.36	0.29	0.34	0	0.11	0.15	0.19	0.1	0	0	0	0
GCA_900013065.1_Clostridioides_difficile_VL_0226_Contig_STX	STX		0.9	0.99	0.99	0.97	0.99	0.55	0.07	0	0.13	0.24	0.68	0.58	0.74	0.3	0.37	0	0	0.1	0	0	0	0	0	0	0	0.15	0	0	0.08	0	0	0.12	0	0.09	0.07	0.39	0.29	0.34	0	0.11	0.15	0.2	0.1	0	0	0	0
GCA_900013355.1_Clostridioides_difficile_VL_0167_Contig_STX	STX		0.9	0.97	0.99	0.96	0.99	0.55	0.24	0	0.13	0.29	0.68	0.87	0.74	0.39	0.42	0.44	0	0.1	0	0	0.05	0	0	0.44	0	0.15	0	0	0.08	0	0	0.12	0	0.25	0.27	0.36	0.29	0.34	0	0.11	0.15	0.19	0.1	0	0	0	0
GCA_900014095.1_Clostridioides_difficile_VL_0343_Contig_STX	STX		0.67	0.91	0.93	0.9	0.92	0.97	0.07	0	0	0.62	0.68	0.59	0.74	0.54	0.51	0	0	0.22	0.19	0	0	0	0	0	0	0.15	0	0	0.08	0	0	0.12	0	0.09	0.07	0.44	0.29	0.34	1	0	0.15	0.19	0.1	0	0	0	0.04
GCA_900014255.1_Clostridioides_difficile_VL_0134_Contig_STX	STX		0.73	1	1	1	1	1	0.29	0.43	0	0.15	0.68	0.59	0.71	0.3	0.38	0	0	0.1	0	0	0	0	0	0	0	0.15	0	1	1	1	1	1	1	1	1	1	1	1	1	0.59	0.15	0.19	0.44	0	0	0	0
GCA_900014425.1_Clostridioides_difficile_VL_0356_Contig_STX	STX		0.36	1	1	1	1	0.56	0.07	0	0	0.14	0.68	0.58	0.74	0.3	0.38	0	0	0.1	0	0.18	0	0	0	0	0	0.14	0	0	0.08	0	0	0.12	0.22	0.09	0.07	0.21	0.29	0.34	0	0	0.15	0.19	0.1	0	0	0	0
GCA_900073085.1_Clostridioides_difficile_CD105KSE1_Contig_STX	STX		0.9	0.98	0.99	0.97	0.99	0.55	0.22	0.12	0.13	0.22	0.68	0.58	0.74	0.51	0.58	0	0.66	0.31	0.53	0.49	0.68	0	0	0.79	0.8	0.57	0	0	0.09	0	0	0.12	0.21	0.28	0.26	0.39	0.29	0.34	0.24	0.12	0.15	0.19	0.1	0	0.21	0	0.23
GCA_900073115.1_Clostridioides_difficile_CD105KSE6_Contig_STX	STX		0.89	0.98	0.99	0.97	0.99	0.35	0.08	0	0.13	0.14	0.68	0.58	0.74	0.3	0.38	0	0	0.1	0	0	0	0	0	0	0	0.15	0	0	0.08	0	0	0.12	0.21	0.09	0.07	0.39	0.29	0.34	0	0	0.15	0.19	0.1	0.13	0	0	0
GCA_900073255.1_Clostridioides_difficile_CD105KSE2_Contig_STX	STX		0.9	0.98	0.99	0.97	0.99	0.55	0.22	0	0.13	0.22	0.68	0.58	0.74	0.51	0.58	0	0.66	0.31	0.53	0.49	0.68	0	0	0.79	0.8	0.57	0	0	0.09	0	0	0.12	0.21	0.28	0.26	0.39	0.29	0.34	0.24	0	0.15	0.19	0.1	0	0.21	0	0.23
GCA_900074815.1_Clostridioides_difficile_CD105KSO10_Contig_STX	STX		0.9	0.98	0.99	0.97	0.99	0.55	0.22	0	0.13	0.22	0.68	0.58	0.74	0.51	0.58	0	0.66	0.31	0.53	0.49	0.68	0	0	0.79	0.8	0.57	0	0	0.09	0	0	0.12	0.21	0.28	0.26	0.39	0.29	0.34	0.24	0	0.15	0.19	0.1	0	0.21	0	0.23
[truncated: 11 more columns]
