# Supplementary material for: A global to local genomics analysis of Clostridioides difficile ST1/RT027 identifies cryptic transmission events in a northern Arizona healthcare network
Source: Microb Genom. 2019 May 20;5(7):e000271. doi: 10.1099/mgen.0.000271 (PMC6700662; doi:10.1099/mgen.0.000271)
Supplement: Supplementary File 16 [file mgen-5-271-s0016.xlsx]

## Sheet: Sheet1
Table S16. in silico ribotyping threshold summary
Threshold (min. read count for any one marker / maximum read count - see methods)	ST1 genomes (n=1241) with in silico ribotype 027	non-ST1 genomes (n=3402) with in silico ribotype 027
0.05	1232	345
0.1	1231	106
0.15	1228	43
0.2	1226	17
0.25	1215	5
0.3	1149	3
