# Supplementary material for: A global to local genomics analysis of Clostridioides difficile ST1/RT027 identifies cryptic transmission events in a northern Arizona healthcare network
Source: Microb Genom. 2019 May 20;5(7):e000271. doi: 10.1099/mgen.0.000271 (PMC6700662; doi:10.1099/mgen.0.000271)
Supplement: Supplementary File 17 [file mgen-5-271-s0017.xlsx]

## Sheet: ISR_Results
Table S17. In silico ribotyping results for all analyzed genomes
Mapped reads for each predicted amplicon
amp_234	amp_267	amp_329	amp_331	amp_370	amp_449	amp_551	Genome ID or SRA Accession	Sequence Type	PCR Ribotype	in silico RT027 hit	dataset*		*dataset:	this study - isolate from this study (n=27)
87	114	258	131	84	185	141	HS-FS-000082-I-02	ST1	na	RT027	this study			Eyre et al. 2018 - isolate from Eyre et al. 2018 with known PCR ribotype (n=624)
147	179	349	161	139	261	232	HS-FS-000084-I-02	ST1	na	RT027	this study			initial test set: sequence data download from SRA in September 2017 (n=4,670)
72	94	182	103	79	158	167	HS-FS-000103-I-02	ST1	na	RT027	this study
61	55	150	58	61	116	106	HS-FS-000127-I-03	ST1	na	RT027	this study
44	64	121	80	66	101	116	HS-FS-000148-I-02	ST1	na	RT027	this study
71	48	150	62	79	139	123	HS-FS-000151-I-02	ST1	na	RT027	this study
61	101	139	67	60	124	107	HS-FS-000173-I-03	ST1	na	RT027	this study
141	147	294	155	130	267	228	HS-FS-000188-I-02	ST1	na	RT027	this study
96	144	249	98	100	216	162	HS-FS-000016-I-01	ST1	na	RT027	this study
95	101	213	96	87	199	154	HS-FS-000020-I-01	ST1	na	RT027	this study
113	131	227	128	95	217	170	HS-FS-000021-I-01	ST1	na	RT027	this study
105	117	206	125	99	172	200	HS-FS-000022-I-01	ST1	na	RT027	this study
88	92	177	96	68	136	157	HS-FS-000023-I-01	ST1	na	RT027	this study
62	85	171	75	62	116	131	HS-FS-000024-I-01	ST1	na	RT027	this study
88	92	133	86	66	148	114	HS-FS-000025-I-01	ST1	na	RT027	this study
70	76	107	56	72	84	89	HS-FS-000027-I-01	ST1	na	RT027	this study
99	152	241	130	122	187	237	HS-FS-000030-I-01	ST1	na	RT027	this study
93	106	253	84	83	191	139	HS-FS-000031-I-01	ST1	na	RT027	this study
102	112	166	87	80	167	139	HS-FS-000034-I-02	ST1	na	RT027	this study
96	125	269	110	106	154	332	HS-FS-000043-I-01	ST1	na	RT027	this study
97	115	162	99	70	124	221	HS-FS-000057-I-02	ST1	na	RT027	this study
85	101	186	118	85	147	198	HS-FS-000091-I-02	ST1	na	RT027	this study
82	317	244	140	141	246	138	HS-FS-000251-I-02	ST1	na	RT027	this study
217	182	401	238	175	396	272	HS-FS-000264-I-02	ST1	na	RT027	this study
91	130	216	119	95	161	186	HS-FS-000287-I-02	ST1	na	RT027	this study
181	209	378	191	157	357	294	HS-FS-000292-I-03	ST1	na	RT027	this study
2044	2218	4164	2187	1883	3663	3177	HS-FS-000194-I-03	ST1	na	RT027	this study
1311	3	1089	75	534	1312	1186	SRR7308630	na	001	0	Eyre et al. 2018
772	2	2080	181	241	597	1698	SRR7308641	na	001	0	Eyre et al. 2018
1069	0	767	32	276	938	802	SRR7308643	na	001	0	Eyre et al. 2018
1628	28	822	38	412	958	1300	SRR7308649	na	001	0	Eyre et al. 2018
449	2	1240	22	176	739	647	SRR7308652	na	001	0	Eyre et al. 2018
2132	3	1662	115	582	1955	1769	SRR7308672	na	001	0	Eyre et al. 2018
1145	4	2789	40	557	2489	674	SRR7308676	na	001	0	Eyre et al. 2018
891	6	2237	169	407	1637	1184	SRR7308678	na	001	0	Eyre et al. 2018
1612	2	3494	280	512	2321	1914	SRR7308679	na	001	0	Eyre et al. 2018
636	4	710	101	127	95	881	SRR7308683	na	001	0	Eyre et al. 2018
627	0	1764	165	285	986	1093	SRR7308692	na	001	0	Eyre et al. 2018
1383	5	3244	338	602	1998	2257	SRR7308697	na	001	0	Eyre et al. 2018
883	2	3103	28	637	2375	1654	SRR7308701	na	001	0	Eyre et al. 2018
965	3	698	45	260	969	650	SRR7308702	na	001	0	Eyre et al. 2018
2503	6	2545	43	657	3401	998	SRR7308712	na	001	0	Eyre et al. 2018
1465	3	4145	129	652	2319	2750	SRR7308714	na	001	0	Eyre et al. 2018
1118	0	845	38	147	748	628	SRR7308715	na	001	0	Eyre et al. 2018
1431	11	4423	315	726	2004	3049	SRR7308718	na	001	0	Eyre et al. 2018
2267	29	1666	71	476	2633	637	SRR7308720	na	001	0	Eyre et al. 2018
1296	2	3165	150	548	1529	2915	SRR7308732	na	001	0	Eyre et al. 2018
1884	12	5734	87	903	3661	3192	SRR7308737	na	001	0	Eyre et al. 2018
777	0	2130	127	410	1769	930	SRR7308761	na	001	0	Eyre et al. 2018
5953	23	4788	339	1294	4256	5282	SRR7308764	na	001	0	Eyre et al. 2018
995	0	2102	15	491	1529	1479	SRR7308768	na	001	0	Eyre et al. 2018
760	1	432	19	129	316	538	SRR7308773	na	001	0	Eyre et al. 2018
1309	0	1074	52	193	752	795	SRR7308776	na	001	0	Eyre et al. 2018
1211	7	1215	87	270	670	1278	SRR7308777	na	001	0	Eyre et al. 2018
1584	0	1016	75	340	1146	1239	SRR7308791	na	001	0	Eyre et al. 2018
2350	4	1597	100	429	1338	1745	SRR7308796	na	001	0	Eyre et al. 2018
1865	12	1264	111	459	1470	1390	SRR7308802	na	001	0	Eyre et al. 2018
353	0	1295	85	217	690	673	SRR7308804	na	001	0	Eyre et al. 2018
693	4	879	90	169	269	1045	SRR7308810	na	001	0	Eyre et al. 2018
2453	0	2028	117	718	2698	1728	SRR7308814	na	001	0	Eyre et al. 2018
1644	3	1995	121	485	1222	1883	SRR7308817	na	001	0	Eyre et al. 2018
613	0	1868	216	253	627	1229	SRR7308818	na	001	0	Eyre et al. 2018
1243	4	2388	50	531	2184	855	SRR7308819	na	001	0	Eyre et al. 2018
1740	7	3872	102	768	2822	2236	SRR7308830	na	001	0	Eyre et al. 2018
1238	2	3030	23	496	2502	766	SRR7308832	na	001	0	Eyre et al. 2018
1829	6	1454	87	488	1501	1515	SRR7308833	na	001	0	Eyre et al. 2018
494	2	1543	211	196	419	976	SRR7308836	na	001	0	Eyre et al. 2018
2406	4	7069	628	1002	2248	4990	SRR7308839	na	001	0	Eyre et al. 2018
2869	12	9346	269	1142	3322	5709	SRR7308842	na	001	0	Eyre et al. 2018
3087	16	3482	273	980	1921	4283	SRR7308848	na	001	0	Eyre et al. 2018
955	0	1105	95	313	411	1452	SRR7308859	na	001	0	Eyre et al. 2018
645	0	1600	127	181	790	882	SRR7308863	na	001	0	Eyre et al. 2018
2015	14	1583	27	486	2262	867	SRR7308865	na	001	0	Eyre et al. 2018
1526	0	1084	84	293	1067	1142	SRR7308877	na	001	0	Eyre et al. 2018
622	2	1956	37	284	1718	425	SRR7308885	na	001	0	Eyre et al. 2018
3092	4	1332	64	441	1669	1676	SRR7308888	na	001	0	Eyre et al. 2018
658	0	1536	146	174	498	1119	SRR7308904	na	001	0	Eyre et al. 2018
929	8	2321	28	379	1570	1430	SRR7308915	na	001	0	Eyre et al. 2018
386	274	837	95	134	487	633	SRR7308918	na	001	0	Eyre et al. 2018
1733	0	867	49	316	860	1341	SRR7308919	na	001	0	Eyre et al. 2018
1910	4	1851	180	415	664	2417	SRR7308932	na	001	0	Eyre et al. 2018
1967	6	2129	220	606	1059	2678	SRR7308939	na	001	0	Eyre et al. 2018
550	0	1422	94	251	782	817	SRR7308941	na	001	0	Eyre et al. 2018
226	3	235	23	60	64	215	SRR7308943	na	001	0	Eyre et al. 2018
1380	12	2831	50	487	2467	924	SRR7308952	na	001	0	Eyre et al. 2018
3196	0	2163	128	741	2754	2111	SRR7308957	na	001	0	Eyre et al. 2018
683	4	1217	41	172	807	595	SRR7308959	na	001	0	Eyre et al. 2018
876	0	771	69	194	315	1052	SRR7308960	na	001	0	Eyre et al. 2018
2494	6	2517	52	620	2930	1393	SRR7308966	na	001	0	Eyre et al. 2018
1365	10	3367	42	695	3120	1129	SRR7308971	na	001	0	Eyre et al. 2018
869	0	910	60	191	403	1131	SRR7308976	na	001	0	Eyre et al. 2018
1173	2	2819	178	367	1071	1789	SRR7308981	na	001	0	Eyre et al. 2018
894	0	753	65	179	358	822	SRR7308988	na	001	0	Eyre et al. 2018
785	0	689	44	142	419	531	SRR7308989	na	001	0	Eyre et al. 2018
1630	4	1701	134	449	1211	1648	SRR7308995	na	001	0	Eyre et al. 2018
899	0	563	54	163	429	699	SRR7308996	na	001	0	Eyre et al. 2018
1324	0	1089	86	340	1293	1061	SRR7308997	na	001	0	Eyre et al. 2018
2310	4	5516	108	1069	4479	1777	SRR7308999	na	001	0	Eyre et al. 2018
2169	6	2237	142	967	2106	2710	SRR7309003	na	001	0	Eyre et al. 2018
3368	10	2703	185	756	2365	2951	SRR7309005	na	001	0	Eyre et al. 2018
1852	5	5573	427	908	2654	3315	SRR7309006	na	001	0	Eyre et al. 2018
1215	0	1170	98	283	528	1365	SRR7309010	na	001	0	Eyre et al. 2018
534	4	799	71	154	272	820	SRR7309011	na	001	0	Eyre et al. 2018
211	0	293	6	63	124	327	SRR7309017	na	001	0	Eyre et al. 2018
425	0	520	40	103	150	619	SRR7309034	na	001	0	Eyre et al. 2018
571	4	1162	85	234	1087	688	SRR7309036	na	001	0	Eyre et al. 2018
2400	21	5742	140	1018	4663	1994	SRR7309037	na	001	0	Eyre et al. 2018
568	7	438	44	133	251	565	SRR7309038	na	001	0	Eyre et al. 2018
1386	0	1144	82	276	866	1080	SRR7309048	na	001	0	Eyre et al. 2018
3782	9	2549	180	1001	3370	2866	SRR7309052	na	001	0	Eyre et al. 2018
776	4	3949	277	764	1461	2005	SRR7309075	na	001	0	Eyre et al. 2018
558	0	544	72	103	124	753	SRR7309078	na	001	0	Eyre et al. 2018
2335	2	2641	234	668	1029	3317	SRR7309082	na	001	0	Eyre et al. 2018
696	4	720	80	146	279	834	SRR7309089	na	001	0	Eyre et al. 2018
1346	6	3766	31	680	3544	1196	SRR7309090	na	001	0	Eyre et al. 2018
1127	0	2590	161	402	1769	1477	SRR7309099	na	001	0	Eyre et al. 2018
2584	10	5689	112	1173	5622	1498	SRR7309111	na	001	0	Eyre et al. 2018
2155	1	1453	108	372	1261	1423	SRR7309115	na	001	0	Eyre et al. 2018
669	4	1833	152	333	928	1155	SRR7309123	na	001	0	Eyre et al. 2018
4624	24	10854	1023	1930	6549	7464	SRR7309124	na	001	0	Eyre et al. 2018
940	4	1878	66	318	1456	1030	SRR7309126	na	001	0	Eyre et al. 2018
498	0	620	50	100	172	669	SRR7309130	na	001	0	Eyre et al. 2018
1808	0	1398	120	361	1111	1386	SRR7309136	na	001	0	Eyre et al. 2018
1005	0	963	74	264	267	1237	SRR7309139	na	001	0	Eyre et al. 2018
2987	3	2961	259	803	2524	2547	SRR7309140	na	001	0	Eyre et al. 2018
575	3	816	84	137	237	850	SRR7309145	na	001	0	Eyre et al. 2018
892	0	498	25	126	555	459	SRR7309149	na	001	0	Eyre et al. 2018
2301	1	1466	124	362	1258	1581	SRR7309159	na	001	0	Eyre et al. 2018
1169	1	943	76	437	513	1322	SRR7309163	na	001	0	Eyre et al. 2018
1081	50	2862	76	405	2315	893	SRR7309167	na	001	0	Eyre et al. 2018
917	2	2690	52	472	2438	989	SRR7309169	na	001	0	Eyre et al. 2018
555	4	887	56	150	259	831	SRR7309174	na	001	0	Eyre et al. 2018
733	2	1987	170	334	580	1306	SRR7309176	na	001	0	Eyre et al. 2018
3065	2	2600	228	570	1726	2249	SRR7309182	na	001	0	Eyre et al. 2018
1753	11	1820	100	433	1132	1878	SRR7309186	na	001	0	Eyre et al. 2018
1235	7	3062	224	658	2412	1768	SRR7309187	na	001	0	Eyre et al. 2018
943	6	2241	127	289	1025	1292	SRR7309198	na	001	0	Eyre et al. 2018
2168	6	1730	108	633	2351	1152	SRR7309203	na	001	0	Eyre et al. 2018
522	2	1429	92	244	767	877	SRR7309205	na	001	0	Eyre et al. 2018
808	2	2284	52	388	1870	677	SRR7309207	na	001	0	Eyre et al. 2018
576	0	1687	174	233	528	994	SRR7309223	na	001	0	Eyre et al. 2018
777	4	2115	132	339	1485	778	SRR7309225	na	001	0	Eyre et al. 2018
605	0	2041	179	245	618	1198	SRR7309226	na	001	0	Eyre et al. 2018
700	0	1116	76	184	379	1057	SRR7309230	na	001	0	Eyre et al. 2018
798	0	1803	107	219	799	1090	SRR7309234	na	001	0	Eyre et al. 2018
523	0	1135	119	170	800	571	SRR7309246	na	001	0	Eyre et al. 2018
12	19	1153	121	117	429	218	SRR7308633	na	002	0	Eyre et al. 2018
0	38	1516	163	216	499	496	SRR7308645	na	002	0	Eyre et al. 2018
4	12	1444	165	133	271	594	SRR7308648	na	002	0	Eyre et al. 2018
671	64	4364	226	572	2485	927	SRR7308659	na	002	0	Eyre et al. 2018
2	65	1886	325	270	509	621	SRR7308677	na	002	0	Eyre et al. 2018
0	69	3142	237	303	1039	1062	SRR7308685	na	002	0	Eyre et al. 2018
0	117	7325	255	487	3270	1053	SRR7308698	na	002	0	Eyre et al. 2018
0	85	6829	404	546	2579	1510	SRR7308704	na	002	0	Eyre et al. 2018
0	42	3731	354	407	1303	1105	SRR7308713	na	002	0	Eyre et al. 2018
0	55	1706	254	216	594	574	SRR7308731	na	002	0	Eyre et al. 2018
2	59	1762	245	236	717	416	SRR7308733	na	002	0	Eyre et al. 2018
23	81	3684	239	340	1248	1134	SRR7308751	na	002	0	Eyre et al. 2018
134	29	3350	47	250	1607	245	SRR7308752	na	002	0	Eyre et al. 2018
0	28	1887	200	256	648	427	SRR7308785	na	002	0	Eyre et al. 2018
24	37	1296	161	132	378	464	SRR7308797	na	002	0	Eyre et al. 2018
0	68	4521	286	426	1517	1257	SRR7308845	na	002	0	Eyre et al. 2018
23	26	4710	69	413	2267	606	SRR7308866	na	002	0	Eyre et al. 2018
11	27	1613	159	178	517	542	SRR7308882	na	002	0	Eyre et al. 2018
455	116	6548	321	464	2780	1493	SRR7308887	na	002	0	Eyre et al. 2018
37	13	2207	196	224	903	454	SRR7308903	na	002	0	Eyre et al. 2018
600	99	7370	169	549	4264	348	SRR7308929	na	002	0	Eyre et al. 2018
43	30	6443	268	489	2661	1231	SRR7308993	na	002	0	Eyre et al. 2018
0	38	1667	212	266	564	697	SRR7309004	na	002	0	Eyre et al. 2018
411	63	4129	284	561	1925	1340	SRR7309007	na	002	0	Eyre et al. 2018
0	14	1060	71	96	375	299	SRR7309009	na	002	0	Eyre et al. 2018
775	86	3794	263	634	2250	727	SRR7309014	na	002	0	Eyre et al. 2018
0	5	8154	1005	1089	3029	2961	SRR7309023	na	002	0	Eyre et al. 2018
0	3	2143	160	238	710	807	SRR7309032	na	002	0	Eyre et al. 2018
9	84	4227	457	450	1511	1018	SRR7309060	na	002	0	Eyre et al. 2018
666	36	4108	211	348	2053	857	SRR7309094	na	002	0	Eyre et al. 2018
0	33	1660	258	249	469	753	SRR7309114	na	002	0	Eyre et al. 2018
68	193	6952	927	841	2543	1734	SRR7309117	na	002	0	Eyre et al. 2018
6	31	3154	195	272	1104	952	SRR7309128	na	002	0	Eyre et al. 2018
0	33	1457	154	167	647	235	SRR7309141	na	002	0	Eyre et al. 2018
0	24	1655	133	179	692	325	SRR7309152	na	002	0	Eyre et al. 2018
0	43	1584	216	232	483	643	SRR7309158	na	002	0	Eyre et al. 2018
0	60	2350	399	376	746	992	SRR7309212	na	002	0	Eyre et al. 2018
0	61	3774	230	371	1105	1409	SRR7309217	na	002	0	Eyre et al. 2018
9	36	1495	190	195	515	386	SRR7309219	na	002	0	Eyre et al. 2018
0	87	4901	310	556	1486	1790	SRR7309229	na	002	0	Eyre et al. 2018
2	32	3718	234	346	1740	612	SRR7309232	na	002	0	Eyre et al. 2018
65	42	3462	51	232	1942	131	SRR7309236	na	002	0	Eyre et al. 2018
11	123	6163	647	794	2046	2133	SRR7309240	na	002	0	Eyre et al. 2018
4	55	7588	153	561	3300	984	SRR7309245	na	002	0	Eyre et al. 2018
756	36	774	98	228	662	668	SRR7308626	na	014	0	Eyre et al. 2018
2959	49	2198	157	797	2358	1458	SRR7308639	na	014	0	Eyre et al. 2018
1221	48	2766	139	1025	3521	1548	SRR7308642	na	014	0	Eyre et al. 2018
1270	102	981	62	561	1316	1469	SRR7308665	na	014	0	Eyre et al. 2018
1508	57	1214	114	399	1386	872	SRR7308667	na	014	0	Eyre et al. 2018
2807	86	3572	217	935	4918	273	SRR7308680	na	014	0	Eyre et al. 2018
1444	71	1564	166	507	1634	859	SRR7308699	na	014	0	Eyre et al. 2018
2288	47	1510	73	494	2130	724	SRR7308710	na	014	0	Eyre et al. 2018
1507	181	2785	124	973	3606	105	SRR7308721	na	014	0	Eyre et al. 2018
933	76	4287	672	705	2385	1536	SRR7308723	na	014	0	Eyre et al. 2018
1294	49	1196	82	366	1017	761	SRR7308727	na	014	0	Eyre et al. 2018
609	43	2422	347	428	1415	930	SRR7308735	na	014	0	Eyre et al. 2018
1050	35	752	54	283	860	508	SRR7308736	na	014	0	Eyre et al. 2018
2320	91	2106	162	786	2213	1475	SRR7308745	na	014	0	Eyre et al. 2018
475	17	409	55	130	352	368	SRR7308748	na	014	0	Eyre et al. 2018
2896	68	3153	171	906	4905	85	SRR7308754	na	014	0	Eyre et al. 2018
1590	34	767	136	263	855	437	SRR7308765	na	014	0	Eyre et al. 2018
190	15	299	20	57	193	164	SRR7308769	na	014	0	Eyre et al. 2018
768	41	2182	148	437	1789	681	SRR7308775	na	014	0	Eyre et al. 2018
1796	82	1372	82	413	2163	231	SRR7308784	na	014	0	Eyre et al. 2018
408	19	1322	138	243	821	402	SRR7308801	na	014	0	Eyre et al. 2018
859	19	894	80	297	932	636	SRR7308806	na	014	0	Eyre et al. 2018
1024	44	945	70	314	1059	628	SRR7308807	na	014	0	Eyre et al. 2018
460	247	1881	272	401	1435	712	SRR7308812	na	014	0	Eyre et al. 2018
696	34	1187	135	349	976	550	SRR7308815	na	014	0	Eyre et al. 2018
605	24	925	138	213	825	434	SRR7308820	na	014	0	Eyre et al. 2018
1328	56	1095	42	459	1940	27	SRR7308821	na	014	0	Eyre et al. 2018
3770	109	3182	234	1141	3598	2329	SRR7308823	na	014	0	Eyre et al. 2018
1595	66	1078	62	368	1410	615	SRR7308824	na	014	0	Eyre et al. 2018
645	31	931	168	229	629	497	SRR7308851	na	014	0	Eyre et al. 2018
461	40	586	81	175	406	365	SRR7308852	na	014	0	Eyre et al. 2018
1087	41	559	36	446	930	1023	SRR7308861	na	014	0	Eyre et al. 2018
616	30	774	115	212	372	622	SRR7308870	na	014	0	Eyre et al. 2018
2478	85	2236	212	757	2424	1524	SRR7308891	na	014	0	Eyre et al. 2018
1305	17	695	30	237	1153	322	SRR7308896	na	014	0	Eyre et al. 2018
5435	61	3045	105	1176	6225	237	SRR7308899	na	014	0	Eyre et al. 2018
1283	210	2202	129	556	2501	108	SRR7308902	na	014	0	Eyre et al. 2018
1916	54	1205	120	404	1506	754	SRR7308907	na	014	0	Eyre et al. 2018
745	44	2549	358	516	1861	817	SRR7308924	na	014	0	Eyre et al. 2018
1097	57	864	168	266	766	596	SRR7308925	na	014	0	Eyre et al. 2018
1746	87	1843	114	638	1748	1417	SRR7308933	na	014	0	Eyre et al. 2018
3042	65	1937	156	749	2391	1118	SRR7308934	na	014	0	Eyre et al. 2018
90	6	316	38	70	131	128	SRR7308936	na	014	0	Eyre et al. 2018
1519	274	1651	62	840	3901	278	SRR7308944	na	014	0	Eyre et al. 2018
1316	44	1058	131	298	923	707	SRR7308947	na	014	0	Eyre et al. 2018
1738	18	1094	153	369	1033	830	SRR7308964	na	014	0	Eyre et al. 2018
807	12	758	84	211	803	387	SRR7308973	na	014	0	Eyre et al. 2018
857	574	3391	246	690	2530	1112	SRR7308975	na	014	0	Eyre et al. 2018
288	33	2186	48	328	965	560	SRR7308994	na	014	0	Eyre et al. 2018
1306	63	1193	85	461	1113	788	SRR7309000	na	014	0	Eyre et al. 2018
487	54	950	116	238	472	668	SRR7309018	na	014	0	Eyre et al. 2018
495	109	1948	173	447	1638	469	SRR7309027	na	014	0	Eyre et al. 2018
2027	51	1405	103	475	2413	217	SRR7309028	na	014	0	Eyre et al. 2018
2793	88	1385	183	571	1932	991	SRR7309030	na	014	0	Eyre et al. 2018
1370	66	1237	125	405	1555	527	SRR7309040	na	014	0	Eyre et al. 2018
596	26	820	96	216	421	622	SRR7309046	na	014	0	Eyre et al. 2018
261	21	357	37	96	184	307	SRR7309071	na	014	0	Eyre et al. 2018
449	43	571	63	245	401	389	SRR7309072	na	014	0	Eyre et al. 2018
128	15	182	26	28	82	108	SRR7309073	na	014	0	Eyre et al. 2018
3378	68	1723	168	641	2857	869	SRR7309076	na	014	0	Eyre et al. 2018
2119	67	1275	186	462	1541	866	SRR7309087	na	014	0	Eyre et al. 2018
2013	136	2050	161	574	1620	1556	SRR7309095	na	014	0	Eyre et al. 2018
1940	47	1232	100	525	2042	538	SRR7309100	na	014	0	Eyre et al. 2018
1766	79	1548	108	527	1533	1274	SRR7309104	na	014	0	Eyre et al. 2018
530	20	1258	160	245	890	488	SRR7309109	na	014	0	Eyre et al. 2018
582	37	2753	370	487	1522	903	SRR7309125	na	014	0	Eyre et al. 2018
1974	63	1126	65	475	1701	637	SRR7309127	na	014	0	Eyre et al. 2018
1239	62	1225	127	391	1188	892	SRR7309142	na	014	0	Eyre et al. 2018
714	26	557	88	184	816	339	SRR7309157	na	014	0	Eyre et al. 2018
2629	518	4221	297	1074	4871	463	SRR7309184	na	014	0	Eyre et al. 2018
2856	83	1586	204	674	2185	1065	SRR7309188	na	014	0	Eyre et al. 2018
1176	42	945	87	247	996	784	SRR7309193	na	014	0	Eyre et al. 2018
2478	75	2053	210	776	2702	1091	SRR7309194	na	014	0	Eyre et al. 2018
1096	66	4228	489	713	2502	1548	SRR7309200	na	014	0	Eyre et al. 2018
1210	54	1131	62	371	1203	704	SRR7309210	na	014	0	Eyre et al. 2018
1072	23	602	120	198	843	321	SRR7309213	na	014	0	Eyre et al. 2018
1808	102	2489	150	670	2270	1394	SRR7309218	na	014	0	Eyre et al. 2018
2035	67	1565	142	532	1865	960	SRR7309220	na	014	0	Eyre et al. 2018
2380	69	1167	114	459	1885	844	SRR7309224	na	014	0	Eyre et al. 2018
265	315	802	118	203	655	326	SRR7309235	na	014	0	Eyre et al. 2018
1169	8	4818	7	409	1739	1885	SRR7308638	na	015	0	Eyre et al. 2018
136	19	1814	16	256	234	879	SRR7308662	na	015	0	Eyre et al. 2018
688	11	889	0	206	154	726	SRR7308670	na	015	0	Eyre et al. 2018
1342	0	1886	0	527	80	2067	SRR7308686	na	015	0	Eyre et al. 2018
303	245	3651	6	558	531	2491	SRR7308700	na	015	0	Eyre et al. 2018
1020	4	3757	17	569	647	2055	SRR7308766	na	015	0	Eyre et al. 2018
1456	3	2253	2	613	799	2091	SRR7308789	na	015	0	Eyre et al. 2018
175	24	2157	7	377	102	1117	SRR7308811	na	015	0	Eyre et al. 2018
1507	73	2415	5	599	863	2126	SRR7308847	na	015	0	Eyre et al. 2018
2068	0	3078	0	807	643	3081	SRR7308858	na	015	0	Eyre et al. 2018
236	26	3024	1	454	239	2056	SRR7308875	na	015	0	Eyre et al. 2018
2769	25	5863	16	1037	1872	4280	SRR7308881	na	015	0	Eyre et al. 2018
279	24	1547	3	260	58	1306	SRR7308914	na	015	0	Eyre et al. 2018
602	0	1121	6	304	55	1160	SRR7308917	na	015	0	Eyre et al. 2018
431	103	3684	0	752	63	2770	SRR7308931	na	015	0	Eyre et al. 2018
184	26	1973	9	291	474	1013	SRR7308958	na	015	0	Eyre et al. 2018
256	18	1410	9	297	115	1149	SRR7308974	na	015	0	Eyre et al. 2018
616	4	2689	5	203	1180	953	SRR7309061	na	015	0	Eyre et al. 2018
1454	84	2607	2	705	512	2869	SRR7309062	na	015	0	Eyre et al. 2018
864	7	4241	3	762	887	2614	SRR7309068	na	015	0	Eyre et al. 2018
622	0	1475	0	344	41	1239	SRR7309138	na	015	0	Eyre et al. 2018
209	33	2666	4	436	568	1431	SRR7309143	na	015	0	Eyre et al. 2018
944	0	5109	0	697	842	2788	SRR7309165	na	015	0	Eyre et al. 2018
2504	4	3132	0	657	69	3142	SRR7309191	na	015	0	Eyre et al. 2018
172	24	2775	12	488	235	1919	SRR7309192	na	015	0	Eyre et al. 2018
232	56	1246	2	279	45	975	SRR7309201	na	015	0	Eyre et al. 2018
975	6	1245	0	362	148	1332	SRR7309211	na	015	0	Eyre et al. 2018
1375	7	5411	8	494	1327	2906	SRR7309242	na	015	0	Eyre et al. 2018
2119	155	3249	8	726	647	2728	SRR7309248	na	015	0	Eyre et al. 2018
221	51	1052	1003	261	1100	710	SRR7308628	na	018	0	Eyre et al. 2018
473	97	1543	1616	399	1952	981	SRR7308671	na	018	0	Eyre et al. 2018
583	101	1556	1957	491	2102	1232	SRR7308744	na	018	0	Eyre et al. 2018
97	44	1002	1385	233	1272	595	SRR7308763	na	018	0	Eyre et al. 2018
209	56	717	790	169	898	422	SRR7308782	na	018	0	Eyre et al. 2018
102	68	1646	1774	391	1961	568	SRR7308787	na	018	0	Eyre et al. 2018
101	288	1345	2352	374	2089	506	SRR7308793	na	018	0	Eyre et al. 2018
61	45	481	514	127	498	312	SRR7308794	na	018	0	Eyre et al. 2018
257	48	1253	1091	230	2111	135	SRR7308795	na	018	0	Eyre et al. 2018
743	289	3612	3901	947	4568	2325	SRR7308816	na	018	0	Eyre et al. 2018
208	25	574	612	169	680	221	SRR7308872	na	018	0	Eyre et al. 2018
630	82	1353	1412	337	2181	763	SRR7308901	na	018	0	Eyre et al. 2018
88	58	355	523	111	490	221	SRR7308908	na	018	0	Eyre et al. 2018
1260	116	1025	1463	357	2076	456	SRR7308910	na	018	0	Eyre et al. 2018
445	86	837	1023	266	1519	281	SRR7308930	na	018	0	Eyre et al. 2018
449	145	1100	1720	392	1567	583	SRR7308945	na	018	0	Eyre et al. 2018
148	135	1217	1319	368	1201	874	SRR7308978	na	018	0	Eyre et al. 2018
1333	119	1061	1381	397	2190	671	SRR7308982	na	018	0	Eyre et al. 2018
1285	102	1755	1666	381	3039	159	SRR7308992	na	018	0	Eyre et al. 2018
225	65	989	831	234	1236	416	SRR7309012	na	018	0	Eyre et al. 2018
421	54	1091	1120	259	1551	624	SRR7309013	na	018	0	Eyre et al. 2018
473	131	1449	1975	443	2186	1095	SRR7309074	na	018	0	Eyre et al. 2018
174	78	311	600	132	576	237	SRR7309096	na	018	0	Eyre et al. 2018
507	108	832	1132	295	1513	390	SRR7309150	na	018	0	Eyre et al. 2018
1753	118	1369	1556	445	2506	915	SRR7309156	na	018	0	Eyre et al. 2018
1466	117	1267	1752	466	2579	650	SRR7309160	na	018	0	Eyre et al. 2018
139	60	616	754	252	806	442	SRR7309172	na	018	0	Eyre et al. 2018
793	26	664	837	171	1441	248	SRR7309190	na	018	0	Eyre et al. 2018
1505	144	1516	1871	494	2669	922	SRR7309195	na	018	0	Eyre et al. 2018
98	39	808	1126	202	1211	330	SRR7309199	na	018	0	Eyre et al. 2018
700	13	801	694	221	1491	344	SRR7309215	na	018	0	Eyre et al. 2018
162	57	563	673	184	836	172	SRR7309216	na	018	0	Eyre et al. 2018
273	77	364	451	129	461	220	SRR7309227	na	018	0	Eyre et al. 2018
425	169	1856	3292	353	4836	124	SRR7309239	na	018	0	Eyre et al. 2018
1356	57	2398	83	894	2397	1771	SRR7308629	na	020	0	Eyre et al. 2018
784	47	431	17	299	816	704	SRR7308635	na	020	0	Eyre et al. 2018
2019	83	1209	76	811	1676	2332	SRR7308644	na	020	0	Eyre et al. 2018
2082	52	600	28	541	2225	109	SRR7308687	na	020	0	Eyre et al. 2018
1052	37	2696	100	984	3536	1208	SRR7308688	na	020	0	Eyre et al. 2018
463	172	1122	35	434	1372	736	SRR7308689	na	020	0	Eyre et al. 2018
1163	26	608	49	398	808	736	SRR7308693	na	020	0	Eyre et al. 2018
1173	46	593	21	381	858	1137	SRR7308709	na	020	0	Eyre et al. 2018
3520	2461	7734	390	3633	10676	5580	SRR7308741	na	020	0	Eyre et al. 2018
1247	53	839	27	463	1226	691	SRR7308750	na	020	0	Eyre et al. 2018
3084	299	2917	69	1439	3058	4750	SRR7308755	na	020	0	Eyre et al. 2018
699	56	335	19	245	618	417	SRR7308759	na	020	0	Eyre et al. 2018
1358	68	993	47	578	1235	1479	SRR7308770	na	020	0	Eyre et al. 2018
2133	107	757	34	743	2876	235	SRR7308772	na	020	0	Eyre et al. 2018
1073	52	604	37	355	855	575	SRR7308778	na	020	0	Eyre et al. 2018
2304	43	1277	160	500	1483	793	SRR7308860	na	020	0	Eyre et al. 2018
1185	29	546	44	395	940	961	SRR7308873	na	020	0	Eyre et al. 2018
521	767	993	64	601	1707	970	SRR7308878	na	020	0	Eyre et al. 2018
2289	114	1408	69	914	1853	2593	SRR7308894	na	020	0	Eyre et al. 2018
356	557	1014	61	376	799	771	SRR7308905	na	020	0	Eyre et al. 2018
1257	40	710	46	414	633	1022	SRR7308927	na	020	0	Eyre et al. 2018
1250	38	816	37	517	2260	94	SRR7308935	na	020	0	Eyre et al. 2018
1008	38	771	58	410	515	1050	SRR7308953	na	020	0	Eyre et al. 2018
615	31	1041	71	445	1454	826	SRR7308969	na	020	0	Eyre et al. 2018
1058	52	673	35	375	687	687	SRR7308977	na	020	0	Eyre et al. 2018
467	47	615	107	179	276	540	SRR7309103	na	020	0	Eyre et al. 2018
1527	52	516	20	400	1084	800	SRR7309107	na	020	0	Eyre et al. 2018
860	30	1212	33	328	1676	28	SRR7309110	na	020	0	Eyre et al. 2018
580	49	436	36	232	485	361	SRR7309116	na	020	0	Eyre et al. 2018
1898	52	937	44	326	1728	200	SRR7309154	na	020	0	Eyre et al. 2018
331	27	1070	61	376	953	687	SRR7309161	na	020	0	Eyre et al. 2018
592	47	2138	119	573	1345	983	SRR7309214	na	020	0	Eyre et al. 2018
796	54	829	81	221	724	409	SRR7309231	na	020	0	Eyre et al. 2018
298	407	698	330	266	702	654	SRR7308627	na	027	RT027	Eyre et al. 2018
993	808	1679	686	771	1832	1443	SRR7308632	na	027	RT027	Eyre et al. 2018
2008	1535	2918	1255	1289	3447	2285	SRR7308634	na	027	RT027	Eyre et al. 2018
667	576	1954	829	788	1807	1351	SRR7308636	na	027	RT027	Eyre et al. 2018
2568	2152	4375	4083	2552	7085	4004	SRR7308637	na	027	RT027	Eyre et al. 2018
555	595	1878	821	684	1801	1174	SRR7308640	na	027	RT027	Eyre et al. 2018
610	520	759	389	377	905	712	SRR7308646	na	027	RT027	Eyre et al. 2018
2988	1906	3545	1734	1992	4974	2724	SRR7308647	na	027	RT027	Eyre et al. 2018
588	521	837	458	375	1077	726	SRR7308650	na	027	RT027	Eyre et al. 2018
956	946	2747	1355	1121	2869	1740	SRR7308651	na	027	RT027	Eyre et al. 2018
615	871	1715	700	632	1907	1380	SRR7308653	na	027	RT027	Eyre et al. 2018
2068	2554	5325	2281	2300	5370	4882	SRR7308654	na	027	RT027	Eyre et al. 2018
703	888	1808	740	733	1959	1398	SRR7308655	na	027	RT027	Eyre et al. 2018
604	643	1278	635	562	1522	1117	SRR7308656	na	027	RT027	Eyre et al. 2018
279	385	1230	640	469	1245	729	SRR7308657	na	027	RT027	Eyre et al. 2018
3420	2221	4164	1896	2043	5455	3170	SRR7308658	na	027	RT027	Eyre et al. 2018
252	330	603	324	282	619	572	SRR7308661	na	027	RT027	Eyre et al. 2018
1158	1181	1664	835	808	2222	1423	SRR7308663	na	027	RT027	Eyre et al. 2018
731	895	1847	890	806	1850	1579	SRR7308664	na	027	RT027	Eyre et al. 2018
993	732	1106	592	514	1276	1229	SRR7308666	na	027	RT027	Eyre et al. 2018
275	429	643	342	299	725	665	SRR7308668	na	027	RT027	Eyre et al. 2018
545	560	844	464	400	975	860	SRR7308669	na	027	RT027	Eyre et al. 2018
1130	1464	2508	1116	809	1999	3372	SRR7308673	na	027	RT027	Eyre et al. 2018
1323	1475	2594	1250	1239	3082	2082	SRR7308675	na	027	RT027	Eyre et al. 2018
307	449	937	426	436	605	1388	SRR7308681	na	027	RT027	Eyre et al. 2018
407	589	913	493	413	1042	1008	SRR7308682	na	027	RT027	Eyre et al. 2018
508	633	880	532	419	1073	818	SRR7308684	na	027	RT027	Eyre et al. 2018
1104	1346	2450	1066	1067	2658	2119	SRR7308690	na	027	RT027	Eyre et al. 2018
639	669	1086	493	491	1425	969	SRR7308691	na	027	RT027	Eyre et al. 2018
397	579	1244	552	508	1191	1098	SRR7308696	na	027	RT027	Eyre et al. 2018
1241	1106	1678	829	741	1559	2517	SRR7308703	na	027	RT027	Eyre et al. 2018
504	519	1039	455	427	917	1016	SRR7308705	na	027	RT027	Eyre et al. 2018
282	380	1358	567	503	1261	751	SRR7308706	na	027	RT027	Eyre et al. 2018
1343	1194	1841	874	836	2345	1599	SRR7308707	na	027	RT027	Eyre et al. 2018
1025	898	1720	693	667	1821	1316	SRR7308711	na	027	RT027	Eyre et al. 2018
752	572	1108	519	545	1353	1843	SRR7308716	na	027	RT027	Eyre et al. 2018
975	841	1275	585	579	1439	960	SRR7308717	na	027	RT027	Eyre et al. 2018
1175	915	1647	852	819	2001	1359	SRR7308724	na	027	RT027	Eyre et al. 2018
359	1111	1436	790	618	1668	1065	SRR7308728	na	027	RT027	Eyre et al. 2018
256	390	1168	545	407	1277	598	SRR7308729	na	027	RT027	Eyre et al. 2018
776	1411	2372	1177	1094	2593	1804	SRR7308730	na	027	RT027	Eyre et al. 2018
1234	1021	1676	668	744	2162	1333	SRR7308734	na	027	RT027	Eyre et al. 2018
244	311	546	214	248	547	538	SRR7308738	na	027	RT027	Eyre et al. 2018
684	790	1580	825	734	1848	1274	SRR7308739	na	027	RT027	Eyre et al. 2018
624	707	1316	692	557	1449	1438	SRR7308740	na	027	RT027	Eyre et al. 2018
301	353	704	325	295	762	659	SRR7308742	na	027	RT027	Eyre et al. 2018
3892	2045	3985	1977	2048	5579	3604	SRR7308743	na	027	RT027	Eyre et al. 2018
430	401	620	335	281	760	531	SRR7308746	na	027	RT027	Eyre et al. 2018
669	707	1051	549	442	1371	940	SRR7308747	na	027	RT027	Eyre et al. 2018
187	341	1151	516	338	766	1269	SRR7308753	na	027	RT027	Eyre et al. 2018
775	748	1121	547	512	1466	1029	SRR7308756	na	027	RT027	Eyre et al. 2018
381	472	525	428	369	921	858	SRR7308757	na	027	RT027	Eyre et al. 2018
850	815	1446	625	649	1288	2118	SRR7308760	na	027	RT027	Eyre et al. 2018
362	457	793	416	384	854	795	SRR7308762	na	027	RT027	Eyre et al. 2018
613	1039	1942	1017	879	1335	3038	SRR7308779	na	027	RT027	Eyre et al. 2018
965	739	1254	646	624	1734	1032	SRR7308780	na	027	RT027	Eyre et al. 2018
371	420	545	235	353	731	548	SRR7308781	na	027	RT027	Eyre et al. 2018
1456	1051	1942	903	1069	2507	1880	SRR7308783	na	027	RT027	Eyre et al. 2018
772	752	1629	765	650	1836	1262	SRR7308788	na	027	RT027	Eyre et al. 2018
779	736	1042	563	496	1225	1039	SRR7308790	na	027	RT027	Eyre et al. 2018
418	571	1085	575	490	1123	1078	SRR7308792	na	027	RT027	Eyre et al. 2018
224	354	1065	461	355	981	625	SRR7308798	na	027	RT027	Eyre et al. 2018
224	333	994	542	365	776	500	SRR7308799	na	027	RT027	Eyre et al. 2018
389	511	871	434	442	954	865	SRR7308800	na	027	RT027	Eyre et al. 2018
714	675	943	501	467	1350	871	SRR7308808	na	027	RT027	Eyre et al. 2018
565	1515	2413	1086	899	2429	1541	SRR7308813	na	027	RT027	Eyre et al. 2018
599	644	1394	601	593	1646	1046	SRR7308826	na	027	RT027	Eyre et al. 2018
128	150	306	150	133	346	237	SRR7308827	na	027	RT027	Eyre et al. 2018
580	511	1189	534	501	1112	1112	SRR7308828	na	027	RT027	Eyre et al. 2018
562	647	1416	570	544	1529	1035	SRR7308829	na	027	RT027	Eyre et al. 2018
163	308	577	352	264	516	788	SRR7308834	na	027	RT027	Eyre et al. 2018
767	933	1932	744	859	1794	1493	SRR7308835	na	027	RT027	Eyre et al. 2018
1935	2373	4561	2032	2132	4640	3999	SRR7308837	na	027	RT027	Eyre et al. 2018
354	361	527	255	244	684	405	SRR7308840	na	027	RT027	Eyre et al. 2018
199	234	430	235	207	516	467	SRR7308841	na	027	RT027	Eyre et al. 2018
319	546	971	464	414	969	928	SRR7308843	na	027	RT027	Eyre et al. 2018
687	743	1013	557	505	1351	1000	SRR7308844	na	027	RT027	Eyre et al. 2018
898	1202	2428	1148	1117	2108	1844	SRR7308849	na	027	RT027	Eyre et al. 2018
309	447	710	273	336	776	753	SRR7308850	na	027	RT027	Eyre et al. 2018
810	761	1408	555	618	1673	1042	SRR7308853	na	027	RT027	Eyre et al. 2018
714	703	1117	511	463	1582	826	SRR7308854	na	027	RT027	Eyre et al. 2018
385	460	780	388	374	873	716	SRR7308856	na	027	RT027	Eyre et al. 2018
515	559	1140	555	480	1344	958	SRR7308857	na	027	RT027	Eyre et al. 2018
1719	1214	2265	1011	1214	3076	1953	SRR7308862	na	027	RT027	Eyre et al. 2018
579	681	1336	682	628	1366	1212	SRR7308864	na	027	RT027	Eyre et al. 2018
3477	3220	5545	2697	2450	6711	4562	SRR7308868	na	027	RT027	Eyre et al. 2018
922	1384	2877	1163	1016	3028	2094	SRR7308871	na	027	RT027	Eyre et al. 2018
591	560	862	480	406	1069	755	SRR7308874	na	027	RT027	Eyre et al. 2018
1677	1459	2773	1326	1413	3717	2407	SRR7308876	na	027	RT027	Eyre et al. 2018
314	925	1530	723	569	1599	1074	SRR7308879	na	027	RT027	Eyre et al. 2018
642	707	1510	669	637	1570	1330	SRR7308883	na	027	RT027	Eyre et al. 2018
851	995	1732	736	705	1680	1596	SRR7308884	na	027	RT027	Eyre et al. 2018
328	455	764	358	388	866	647	SRR7308886	na	027	RT027	Eyre et al. 2018
420	476	826	453	398	862	823	SRR7308889	na	027	RT027	Eyre et al. 2018
342	436	868	380	394	850	853	SRR7308890	na	027	RT027	Eyre et al. 2018
643	599	744	394	427	992	756	SRR7308892	na	027	RT027	Eyre et al. 2018
1182	1127	1840	803	862	1563	2644	SRR7308893	na	027	RT027	Eyre et al. 2018
1041	740	1537	742	775	2020	1284	SRR7308897	na	027	RT027	Eyre et al. 2018
521	476	989	595	421	1116	862	SRR7308898	na	027	RT027	Eyre et al. 2018
866	646	1088	590	510	1437	908	SRR7308906	na	027	RT027	Eyre et al. 2018
2189	2182	3726	1808	1608	3172	5326	SRR7308909	na	027	RT027	Eyre et al. 2018
203	296	455	236	236	539	462	SRR7308911	na	027	RT027	Eyre et al. 2018
176	507	695	356	266	749	516	SRR7308913	na	027	RT027	Eyre et al. 2018
282	294	436	208	249	561	465	SRR7308921	na	027	RT027	Eyre et al. 2018
972	1304	2049	1047	964	1750	2901	SRR7308922	na	027	RT027	Eyre et al. 2018
946	888	2761	795	962	2717	1443	SRR7308923	na	027	RT027	Eyre et al. 2018
1250	1058	1603	837	794	2395	1523	SRR7308928	na	027	RT027	Eyre et al. 2018
511	591	2245	812	731	1801	1416	SRR7308937	na	027	RT027	Eyre et al. 2018
542	654	1097	519	424	1161	979	SRR7308942	na	027	RT027	Eyre et al. 2018
2103	1459	2653	1278	1357	3770	2077	SRR7308948	na	027	RT027	Eyre et al. 2018
983	1134	1539	774	735	1616	1126	SRR7308949	na	027	RT027	Eyre et al. 2018
754	572	938	453	453	1252	887	SRR7308950	na	027	RT027	Eyre et al. 2018
2246	2712	5314	2348	2212	5617	4628	SRR7308951	na	027	RT027	Eyre et al. 2018
235	513	676	357	280	750	531	SRR7308954	na	027	RT027	Eyre et al. 2018
1489	1077	2140	1000	889	2678	1803	SRR7308961	na	027	RT027	Eyre et al. 2018
977	1042	1965	901	884	2349	1768	SRR7308962	na	027	RT027	Eyre et al. 2018
1055	979	1781	731	759	2055	1307	SRR7308963	na	027	RT027	Eyre et al. 2018
19	24	60	25	18	54	66	SRR7308965	na	027	RT027	Eyre et al. 2018
472	543	1118	460	460	1225	884	SRR7308967	na	027	RT027	Eyre et al. 2018
487	636	1274	577	533	1162	1212	SRR7308968	na	027	RT027	Eyre et al. 2018
1195	957	1732	869	865	2073	1592	SRR7308979	na	027	RT027	Eyre et al. 2018
1143	2030	3341	1502	1503	3856	2472	SRR7308980	na	027	RT027	Eyre et al. 2018
2739	2189	4078	1813	1730	4623	3607	SRR7308983	na	027	RT027	Eyre et al. 2018
819	1009	1823	826	815	1854	1626	SRR7308984	na	027	RT027	Eyre et al. 2018
490	560	1161	521	482	1089	1120	SRR7308987	na	027	RT027	Eyre et al. 2018
780	971	1593	681	705	1672	1431	SRR7308990	na	027	RT027	Eyre et al. 2018
308	489	974	482	380	707	1441	SRR7308991	na	027	RT027	Eyre et al. 2018
1606	1178	2223	945	1210	3034	1710	SRR7308998	na	027	RT027	Eyre et al. 2018
982	1288	2597	1196	946	2795	1947	SRR7309001	na	027	RT027	Eyre et al. 2018
501	622	1021	561	542	1191	1077	SRR7309002	na	027	RT027	Eyre et al. 2018
585	1530	2315	1026	859	2400	1472	SRR7309008	na	027	RT027	Eyre et al. 2018
265	388	691	326	305	772	577	SRR7309015	na	027	RT027	Eyre et al. 2018
1388	749	1613	700	860	2182	1289	SRR7309016	na	027	RT027	Eyre et al. 2018
245	242	469	217	224	576	424	SRR7309019	na	027	RT027	Eyre et al. 2018
1756	1447	2201	997	991	2778	1959	SRR7309020	na	027	RT027	Eyre et al. 2018
333	771	1115	571	449	1249	814	SRR7309021	na	027	RT027	Eyre et al. 2018
536	463	757	382	360	924	588	SRR7309024	na	027	RT027	Eyre et al. 2018
455	402	663	352	280	735	588	SRR7309026	na	027	RT027	Eyre et al. 2018
746	873	1941	800	727	1987	1592	SRR7309029	na	027	RT027	Eyre et al. 2018
1614	1567	2507	1303	1179	3106	1922	SRR7309031	na	027	RT027	Eyre et al. 2018
750	730	1557	674	656	1868	1272	SRR7309033	na	027	RT027	Eyre et al. 2018
710	545	915	430	417	1262	817	SRR7309035	na	027	RT027	Eyre et al. 2018
345	267	463	194	217	610	372	SRR7309039	na	027	RT027	Eyre et al. 2018
931	606	939	516	495	1263	848	SRR7309042	na	027	RT027	Eyre et al. 2018
506	608	991	429	399	1113	865	SRR7309043	na	027	RT027	Eyre et al. 2018
967	931	1573	704	705	1640	1286	SRR7309047	na	027	RT027	Eyre et al. 2018
971	1089	2207	875	957	2344	1731	SRR7309050	na	027	RT027	Eyre et al. 2018
121	131	285	139	96	297	198	SRR7309051	na	027	RT027	Eyre et al. 2018
1108	967	1751	771	734	2043	1473	SRR7309053	na	027	RT027	Eyre et al. 2018
1762	1148	1955	958	962	2808	1681	SRR7309054	na	027	RT027	Eyre et al. 2018
1118	1056	1792	771	878	2198	1434	SRR7309055	na	027	RT027	Eyre et al. 2018
638	551	873	460	412	1047	814	SRR7309056	na	027	RT027	Eyre et al. 2018
1093	1063	1792	951	844	2404	1481	SRR7309057	na	027	RT027	Eyre et al. 2018
524	741	1258	603	485	1228	1206	SRR7309058	na	027	RT027	Eyre et al. 2018
527	642	2060	902	675	2027	1270	SRR7309063	na	027	RT027	Eyre et al. 2018
427	554	1822	792	672	1514	1191	SRR7309064	na	027	RT027	Eyre et al. 2018
456	440	589	284	300	700	595	SRR7309065	na	027	RT027	Eyre et al. 2018
578	230	862	384	375	940	704	SRR7309066	na	027	RT027	Eyre et al. 2018
1121	2935	4567	1928	1805	4957	3213	SRR7309067	na	027	RT027	Eyre et al. 2018
679	726	1517	707	649	1694	1256	SRR7309069	na	027	RT027	Eyre et al. 2018
977	851	1699	725	680	1844	1441	SRR7309070	na	027	RT027	Eyre et al. 2018
522	770	2428	1070	833	2255	1558	SRR7309079	na	027	RT027	Eyre et al. 2018
2306	1328	2953	1178	1521	3790	2520	SRR7309080	na	027	RT027	Eyre et al. 2018
1595	2028	4001	1828	1794	3957	3618	SRR7309081	na	027	RT027	Eyre et al. 2018
1478	1353	2415	1129	1006	2736	2136	SRR7309083	na	027	RT027	Eyre et al. 2018
2455	1704	3429	1526	1794	4806	2756	SRR7309086	na	027	RT027	Eyre et al. 2018
1019	1059	2110	998	939	2248	1742	SRR7309091	na	027	RT027	Eyre et al. 2018
2114	1289	2365	994	1228	3966	1615	SRR7309092	na	027	RT027	Eyre et al. 2018
1479	893	1814	844	968	2397	1715	SRR7309093	na	027	RT027	Eyre et al. 2018
722	667	947	545	453	1219	908	SRR7309101	na	027	RT027	Eyre et al. 2018
187	220	548	194	224	528	429	SRR7309105	na	027	RT027	Eyre et al. 2018
1626	1527	2147	1003	1082	2668	1665	SRR7309106	na	027	RT027	Eyre et al. 2018
266	343	752	318	333	779	705	SRR7309108	na	027	RT027	Eyre et al. 2018
2457	2092	3552	1786	1566	4561	2941	SRR7309112	na	027	RT027	Eyre et al. 2018
514	602	1182	592	520	1330	1158	SRR7309118	na	027	RT027	Eyre et al. 2018
1346	1118	1624	709	810	2037	1454	SRR7309119	na	027	RT027	Eyre et al. 2018
123	142	298	91	133	277	260	SRR7309120	na	027	RT027	Eyre et al. 2018
732	632	1192	569	510	1229	1015	SRR7309121	na	027	RT027	Eyre et al. 2018
393	436	621	334	325	752	657	SRR7309122	na	027	RT027	Eyre et al. 2018
587	746	1593	757	635	1333	2301	SRR7309129	na	027	RT027	Eyre et al. 2018
666	692	1245	635	554	1192	1184	SRR7309131	na	027	RT027	Eyre et al. 2018
314	488	783	354	350	590	1168	SRR7309132	na	027	RT027	Eyre et al. 2018
380	313	698	311	311	865	647	SRR7309133	na	027	RT027	Eyre et al. 2018
794	774	2677	1102	924	2354	1661	SRR7309135	na	027	RT027	Eyre et al. 2018
1307	1093	2176	973	1035	2613	1491	SRR7309137	na	027	RT027	Eyre et al. 2018
1970	1713	3335	1609	1609	3449	3081	SRR7309144	na	027	RT027	Eyre et al. 2018
87	173	304	163	121	325	300	SRR7309146	na	027	RT027	Eyre et al. 2018
732	729	1570	664	633	1575	1431	SRR7309147	na	027	RT027	Eyre et al. 2018
479	602	1247	576	537	1409	1132	SRR7309153	na	027	RT027	Eyre et al. 2018
321	382	523	287	267	394	834	SRR7309162	na	027	RT027	Eyre et al. 2018
309	402	704	346	345	904	685	SRR7309164	na	027	RT027	Eyre et al. 2018
404	540	1189	561	498	1079	1053	SRR7309166	na	027	RT027	Eyre et al. 2018
287	379	741	374	326	752	650	SRR7309168	na	027	RT027	Eyre et al. 2018
750	848	1541	709	696	1611	1368	SRR7309170	na	027	RT027	Eyre et al. 2018
369	425	914	387	416	953	784	SRR7309173	na	027	RT027	Eyre et al. 2018
2457	6787	10530	5179	4144	11926	7461	SRR7309175	na	027	RT027	Eyre et al. 2018
457	561	1766	779	625	1752	1023	SRR7309177	na	027	RT027	Eyre et al. 2018
1470	1039	1784	870	826	2421	1617	SRR7309180	na	027	RT027	Eyre et al. 2018
1748	1582	2793	1495	1407	2414	4737	SRR7309181	na	027	RT027	Eyre et al. 2018
4414	4571	8630	4028	3716	9354	7350	SRR7309183	na	027	RT027	Eyre et al. 2018
674	1019	3223	1370	1157	3251	1503	SRR7309185	na	027	RT027	Eyre et al. 2018
795	832	1817	760	812	1850	1425	SRR7309189	na	027	RT027	Eyre et al. 2018
2039	2937	9701	4550	3477	9540	5731	SRR7309196	na	027	RT027	Eyre et al. 2018
844	956	2009	902	851	2033	1736	SRR7309202	na	027	RT027	Eyre et al. 2018
596	704	1402	597	626	1509	1157	SRR7309204	na	027	RT027	Eyre et al. 2018
1494	1219	2486	2167	1565	3952	2266	SRR7309206	na	027	RT027	Eyre et al. 2018
284	288	445	220	190	567	417	SRR7309208	na	027	RT027	Eyre et al. 2018
492	540	676	342	315	908	599	SRR7309209	na	027	RT027	Eyre et al. 2018
227	399	1081	507	376	995	819	SRR7309221	na	027	RT027	Eyre et al. 2018
225	276	554	255	243	438	722	SRR7309222	na	027	RT027	Eyre et al. 2018
422	542	900	458	429	1113	828	SRR7309233	na	027	RT027	Eyre et al. 2018
282	402	549	241	252	740	387	SRR7309237	na	027	RT027	Eyre et al. 2018
772	797	1209	521	564	1453	1053	SRR7309238	na	027	RT027	Eyre et al. 2018
708	959	2022	780	783	2037	1668	SRR7309241	na	027	RT027	Eyre et al. 2018
987	1053	2294	927	958	2369	1939	SRR7309243	na	027	RT027	Eyre et al. 2018
382	411	857	338	339	795	667	SRR7309247	na	027	RT027	Eyre et al. 2018
4925	19	386	62	2510	4815	181	SRR7308674	na	078	0	Eyre et al. 2018
4003	3	364	138	2111	4105	211	SRR7308695	na	078	0	Eyre et al. 2018
0	3	1001	418	1915	2877	181	SRR7308725	na	078	0	Eyre et al. 2018
0	0	714	565	1189	1740	173	SRR7308726	na	078	0	Eyre et al. 2018
0	3	724	944	1130	2523	132	SRR7308758	na	078	0	Eyre et al. 2018
2457	5	96	9	928	1837	23	SRR7308805	na	078	0	Eyre et al. 2018
0	11	987	708	2149	2689	391	SRR7308809	na	078	0	Eyre et al. 2018
0	0	367	662	467	1126	31	SRR7308822	na	078	0	Eyre et al. 2018
2208	6	303	193	1354	2657	71	SRR7308831	na	078	0	Eyre et al. 2018
0	0	560	1001	847	1899	62	SRR7308838	na	078	0	Eyre et al. 2018
672	0	375	136	1847	2521	175	SRR7308846	na	078	0	Eyre et al. 2018
4815	15	527	59	2646	4135	114	SRR7308867	na	078	0	Eyre et al. 2018
311	0	1636	2934	2140	4728	252	SRR7308895	na	078	0	Eyre et al. 2018
1740	2245	850	157	3042	3986	146	SRR7308900	na	078	0	Eyre et al. 2018
0	5	610	857	1206	1913	214	SRR7308912	na	078	0	Eyre et al. 2018
0	7	1457	1225	2625	3949	400	SRR7308920	na	078	0	Eyre et al. 2018
3	2	831	857	1013	1335	174	SRR7308926	na	078	0	Eyre et al. 2018
225	6	379	334	511	975	132	SRR7308938	na	078	0	Eyre et al. 2018
0	2	1172	2458	1483	3504	127	SRR7308946	na	078	0	Eyre et al. 2018
116	8	1535	1008	2772	3654	458	SRR7308955	na	078	0	Eyre et al. 2018
52	12	607	586	1456	1741	255	SRR7308972	na	078	0	Eyre et al. 2018
0	7	1151	1333	2243	3589	263	SRR7308986	na	078	0	Eyre et al. 2018
1638	5	1155	1512	3295	4242	672	SRR7309025	na	078	0	Eyre et al. 2018
406	16	517	944	959	2224	116	SRR7309049	na	078	0	Eyre et al. 2018
828	5	1157	2062	1761	4288	146	SRR7309059	na	078	0	Eyre et al. 2018
473	771	653	1117	1560	2866	155	SRR7309084	na	078	0	Eyre et al. 2018
7	4	250	377	451	1148	38	SRR7309098	na	078	0	Eyre et al. 2018
0	0	1187	1105	1825	2436	252	SRR7309151	na	078	0	Eyre et al. 2018
0	4	236	568	483	1312	66	SRR7309155	na	078	0	Eyre et al. 2018
0	0	302	444	594	1339	62	SRR7309171	na	078	0	Eyre et al. 2018
699	0	391	621	748	2140	23	SRR7309228	na	078	0	Eyre et al. 2018
481	562	1132	573	456	1572	140	SRR7308625	na	176	0	Eyre et al. 2018
623	753	1414	641	678	1873	135	SRR7308631	na	176	0	Eyre et al. 2018
597	547	701	418	418	1197	32	SRR7308660	na	176	0	Eyre et al. 2018
1161	1368	2730	1264	1184	3729	176	SRR7308694	na	176	0	Eyre et al. 2018
275	340	977	430	419	1221	134	SRR7308722	na	176	0	Eyre et al. 2018
1269	1041	2191	960	992	2977	84	SRR7308767	na	176	0	Eyre et al. 2018
821	665	1304	498	492	1832	79	SRR7308771	na	176	0	Eyre et al. 2018
209	322	592	240	241	797	39	SRR7308825	na	176	0	Eyre et al. 2018
776	1411	2372	1177	1094	2593	1804	SRR7308869	na	176	RT027	Eyre et al. 2018
883	926	1920	821	818	2524	182	SRR7308880	na	176	0	Eyre et al. 2018
291	361	708	313	292	941	74	SRR7308940	na	176	0	Eyre et al. 2018
625	845	1410	776	684	1922	140	SRR7308956	na	176	0	Eyre et al. 2018
246	295	605	259	273	798	26	SRR7308985	na	176	0	Eyre et al. 2018
467	447	671	325	325	1069	36	SRR7309085	na	176	0	Eyre et al. 2018
681	598	964	430	443	1460	73	SRR7309097	na	176	0	Eyre et al. 2018
1383	902	2124	846	919	2850	19	SRR7309113	na	176	0	Eyre et al. 2018
976	1180	2681	1065	964	3209	218	SRR7309134	na	176	0	Eyre et al. 2018
1325	1225	1741	889	871	2832	50	SRR7309148	na	176	0	Eyre et al. 2018
1594	816	1835	892	1016	3028	15	SRR7309179	na	176	0	Eyre et al. 2018
460	681	1248	503	482	1627	155	SRR7309197	na	176	0	Eyre et al. 2018
1249	1153	3439	1549	1332	3993	18	SRR7309244	na	176	0	Eyre et al. 2018
114	82	2889	757	218	1820	503	SRR7308708	na	356	0	Eyre et al. 2018
60	285	782	1590	165	968	322	SRR7308719	na	356	0	Eyre et al. 2018
1843	36	966	1047	88	2569	37	SRR7308749	na	356	0	Eyre et al. 2018
3945	125	2447	2563	277	5679	146	SRR7308774	na	356	0	Eyre et al. 2018
489	152	1928	2233	336	1869	1121	SRR7308786	na	356	0	Eyre et al. 2018
1399	182	1467	2335	251	2308	714	SRR7308803	na	356	0	Eyre et al. 2018
134	65	1163	2374	229	1147	971	SRR7308855	na	356	0	Eyre et al. 2018
0	40	920	961	101	608	471	SRR7308916	na	356	0	Eyre et al. 2018
253	49	1290	1482	90	1757	91	SRR7308970	na	356	0	Eyre et al. 2018
1297	58	758	998	70	1739	52	SRR7309022	na	356	0	Eyre et al. 2018
126	47	1353	2129	170	1473	626	SRR7309041	na	356	0	Eyre et al. 2018
291	95	629	739	97	829	231	SRR7309044	na	356	0	Eyre et al. 2018
559	96	1282	1450	230	1434	721	SRR7309045	na	356	0	Eyre et al. 2018
179	86	585	943	80	809	297	SRR7309077	na	356	0	Eyre et al. 2018
58	128	1099	1043	115	860	432	SRR7309088	na	356	0	Eyre et al. 2018
247	299	2490	2769	349	2491	882	SRR7309102	na	356	0	Eyre et al. 2018
474	218	5868	8173	857	6740	1877	SRR7309178	na	356	0	Eyre et al. 2018
627	799	1482	783	618	1552	1325	ERR024642	ST1	na	RT027	initial test set
662	779	1407	658	622	1321	1272	ERR024643	ST1	na	RT027	initial test set
630	765	1453	708	698	1491	1233	ERR024646	ST1	na	RT027	initial test set
464	585	1130	454	461	1109	1004	ERR024647	ST1	na	RT027	initial test set
536	780	1364	727	584	1296	1225	ERR024648	ST1	na	RT027	initial test set
427	559	1016	558	471	1117	911	ERR024649	ST1	na	RT027	initial test set
506	655	1073	577	511	1249	1068	ERR024650	ST1	na	RT027	initial test set
633	840	1356	775	632	1439	1334	ERR024651	ST1	na	RT027	initial test set
507	660	1329	612	603	1148	1164	ERR024652	ST1	na	RT027	initial test set
565	786	1212	682	524	1405	1137	ERR024653	ST1	na	RT027	initial test set
668	847	1574	889	737	1588	1501	ERR024655	ST1	na	RT027	initial test set
696	865	1574	757	715	1582	1346	ERR024656	ST1	na	RT027	initial test set
496	534	853	461	403	605	999	ERR024657	ST1	na	RT027	initial test set
1005	1188	2069	1179	1024	2227	1962	ERR024659	ST1	na	RT027	initial test set
506	757	1271	542	507	1292	1050	ERR024660	ST1	na	RT027	initial test set
401	580	1031	524	434	1134	920	ERR024661	ST1	na	RT027	initial test set
382	484	922	463	360	1041	801	ERR024662	ST1	na	RT027	initial test set
107	122	218	119	93	271	242	ERR024663	ST1	na	RT027	initial test set
510	737	1252	573	581	1214	1056	ERR024664	ST1	na	RT027	initial test set
666	820	1396	719	644	1464	1390	ERR024665	ST1	na	RT027	initial test set
623	728	1495	757	600	1425	1263	ERR024666	ST1	na	RT027	initial test set
245	538	881	435	456	864	741	ERR024996	ST1	na	RT027	initial test set
234	465	833	478	426	767	762	ERR024997	ST1	na	RT027	initial test set
233	499	887	386	434	780	754	ERR024998	ST1	na	RT027	initial test set
115	274	485	228	243	478	415	ERR024999	ST1	na	RT027	initial test set
167	264	489	264	270	474	424	ERR025000	ST1	na	RT027	initial test set
191	388	675	322	371	702	556	ERR025001	ST1	na	RT027	initial test set
230	426	895	430	391	849	723	ERR025002	ST1	na	RT027	initial test set
82	185	410	150	184	346	307	ERR025003	ST1	na	RT027	initial test set
285	399	846	429	420	855	706	ERR025004	ST1	na	RT027	initial test set
180	369	726	314	281	517	533	ERR025005	ST1	na	RT027	initial test set
246	502	914	466	458	788	810	ERR025006	ST1	na	RT027	initial test set
232	441	674	415	373	703	639	ERR025007	ST1	na	RT027	initial test set
250	439	861	473	432	791	891	ERR025010	ST1	na	RT027	initial test set
212	462	881	450	428	792	769	ERR025011	ST1	na	RT027	initial test set
94	214	418	164	184	338	307	ERR025012	ST1	na	RT027	initial test set
306	646	1070	568	530	994	934	ERR025014	ST1	na	RT027	initial test set
136	393	790	320	427	710	664	ERR025015	ST1	na	RT027	initial test set
170	418	989	410	420	704	767	ERR025016	ST1	na	RT027	initial test set
303	636	1164	533	535	1010	953	ERR025017	ST1	na	RT027	initial test set
190	355	625	281	308	553	586	ERR025018	ST1	na	RT027	initial test set
420	538	1101	500	538	998	918	ERR025019	ST1	na	RT027	initial test set
279	627	1073	527	578	977	952	ERR025020	ST1	na	RT027	initial test set
167	252	421	215	233	437	358	ERR025023	ST1	na	RT027	initial test set
100	269	431	224	225	360	404	ERR025024	ST1	na	RT027	initial test set
127	297	478	298	279	456	442	ERR025025	ST1	na	RT027	initial test set
175	351	725	360	322	578	591	ERR025026	ST1	na	RT027	initial test set
164	297	595	263	269	573	480	ERR025027	ST1	na	RT027	initial test set
132	262	574	247	240	494	475	ERR025028	ST1	na	RT027	initial test set
152	276	546	294	270	568	397	ERR025029	ST1	na	RT027	initial test set
135	293	623	323	285	542	459	ERR025030	ST1	na	RT027	initial test set
159	360	501	291	281	449	475	ERR025031	ST1	na	RT027	initial test set
147	325	646	219	239	463	444	ERR025032	ST1	na	RT027	initial test set
213	330	565	344	330	540	590	ERR025033	ST1	na	RT027	initial test set
92	203	364	170	182	326	310	ERR025035	ST1	na	RT027	initial test set
193	503	959	479	451	913	782	ERR025036	ST1	na	RT027	initial test set
364	680	1195	644	643	1124	1069	ERR025038	ST1	na	RT027	initial test set
403	935	1644	687	741	1670	1167	ERR025039	ST1	na	RT027	initial test set
142	345	642	298	322	641	531	ERR025040	ST1	na	RT027	initial test set
197	348	658	333	300	540	587	ERR025041	ST1	na	RT027	initial test set
166	266	500	258	233	459	439	ERR025042	ST1	na	RT027	initial test set
135	277	552	244	233	515	434	ERR025043	ST1	na	RT027	initial test set
175	423	641	329	335	594	468	ERR025044	ST1	na	RT027	initial test set
197	411	766	343	344	651	661	ERR025045	ST1	na	RT027	initial test set
194	389	719	356	392	647	650	ERR025048	ST1	na	RT027	initial test set
138	237	393	241	211	350	469	ERR025049	ST1	na	RT027	initial test set
221	479	911	478	413	846	574	ERR025050	ST1	na	RT027	initial test set
293	418	823	463	378	776	708	ERR025051	ST1	na	RT027	initial test set
130	327	593	289	315	563	514	ERR025052	ST1	na	RT027	initial test set
100	222	317	128	158	293	280	ERR025053	ST1	na	RT027	initial test set
165	299	522	292	274	337	521	ERR025054	ST1	na	RT027	initial test set
138	312	568	308	278	571	439	ERR025055	ST1	na	RT027	initial test set
125	253	525	274	226	400	415	ERR025056	ST1	na	RT027	initial test set
211	487	908	370	411	679	737	ERR025058	ST1	na	RT027	initial test set
88	251	459	196	205	399	322	ERR025059	ST1	na	RT027	initial test set
163	376	644	356	340	646	625	ERR025061	ST1	na	RT027	initial test set
150	322	563	285	281	550	491	ERR025062	ST1	na	RT027	initial test set
144	328	503	279	265	486	516	ERR025063	ST1	na	RT027	initial test set
269	588	999	479	504	874	828	ERR025064	ST1	na	RT027	initial test set
251	479	852	385	426	766	619	ERR025065	ST1	na	RT027	initial test set
293	527	1052	522	528	867	938	ERR025066	ST1	na	RT027	initial test set
75	174	360	155	171	408	269	ERR025069	ST1	na	RT027	initial test set
246	449	751	387	440	729	658	ERR025070	ST1	na	RT027	initial test set
176	275	482	243	249	452	431	ERR025072	ST1	na	RT027	initial test set
42	120	243	112	119	182	215	ERR025330	ST1	na	RT027	initial test set
81	79	146	88	88	184	136	ERR025331	ST1	na	RT027	initial test set
47	126	233	97	115	224	197	ERR025332	ST1	na	RT027	initial test set
118	253	410	205	234	416	381	ERR025333	ST1	na	RT027	initial test set
120	245	420	203	206	365	378	ERR025334	ST1	na	RT027	initial test set
72	163	353	125	172	323	245	ERR025335	ST1	na	RT027	initial test set
107	185	339	152	175	246	366	ERR025336	ST1	na	RT027	initial test set
77	140	315	106	129	222	200	ERR025337	ST1	na	RT027	initial test set
106	247	463	184	219	362	383	ERR025338	ST1	na	RT027	initial test set
142	245	426	245	219	308	430	ERR025340	ST1	na	RT027	initial test set
105	216	419	206	208	347	329	ERR025341	ST1	na	RT027	initial test set
338	462	779	429	389	915	855	ERR025343	ST1	na	RT027	initial test set
247	248	459	224	241	706	284	ERR025344	ST1	na	RT027	initial test set
303	397	711	419	371	859	756	ERR025345	ST1	na	RT027	initial test set
377	462	885	465	383	963	859	ERR025346	ST1	na	RT027	initial test set
279	453	805	396	343	1164	471	ERR025347	ST1	na	RT027	initial test set
303	380	644	345	351	931	431	ERR025348	ST1	na	RT027	initial test set
230	304	884	273	250	458	592	ERR025350	ST1	na	RT027	initial test set
483	542	1009	492	502	1301	571	ERR025351	ST1	na	RT027	initial test set
330	467	887	466	429	1158	520	ERR025352	ST1	na	RT027	initial test set
526	637	1165	594	576	1616	744	ERR025353	ST1	na	RT027	initial test set
413	448	837	388	421	1213	567	ERR025354	ST1	na	RT027	initial test set
320	399	740	430	378	764	773	ERR026352	ST1	na	RT027	initial test set
272	227	510	213	273	510	729	ERR026353	ST1	na	RT027	initial test set
163	246	472	231	196	393	714	ERR026354	ST1	na	RT027	initial test set
272	293	471	318	228	556	532	ERR026355	ST1	na	RT027	initial test set
181	236	480	267	241	480	503	ERR026356	ST1	na	RT027	initial test set
348	209	648	184	255	599	549	ERR026357	ST1	na	RT027	initial test set
151	306	590	308	247	479	853	ERR026358	ST1	na	RT027	initial test set
178	246	510	238	223	402	722	ERR026359	ST1	na	RT027	initial test set
263	277	474	231	254	503	457	ERR026360	ST1	na	RT027	initial test set
253	313	566	284	295	631	571	ERR026361	ST1	na	RT027	initial test set
167	269	496	283	234	424	823	ERR026362	ST1	na	RT027	initial test set
191	284	613	277	265	507	793	ERR026363	ST1	na	RT027	initial test set
263	364	648	363	321	650	1154	ERR026365	ST1	na	RT027	initial test set
277	451	859	417	399	806	811	ERR026366	ST1	na	RT027	initial test set
400	506	907	502	459	1028	898	ERR026367	ST1	na	RT027	initial test set
315	393	671	341	378	837	724	ERR026368	ST1	na	RT027	initial test set
323	396	669	378	391	838	775	ERR026369	ST1	na	RT027	initial test set
378	566	923	501	499	819	1806	ERR026370	ST1	na	RT027	initial test set
295	339	555	319	301	577	1076	ERR026371	ST1	na	RT027	initial test set
282	355	655	320	291	621	1178	ERR026372	ST1	na	RT027	initial test set
271	360	783	357	330	772	730	ERR026373	ST1	na	RT027	initial test set
211	325	490	254	238	459	902	ERR026374	ST1	na	RT027	initial test set
363	526	822	476	360	917	843	ERR026375	ST1	na	RT027	initial test set
220	348	577	236	292	551	622	ERR026376	ST1	na	RT027	initial test set
947	1260	2401	1202	1158	2752	2484	ERR026378	ST1	na	RT027	initial test set
260	387	574	281	256	680	503	ERR026379	ST1	na	RT027	initial test set
337	407	622	327	320	662	1201	ERR026380	ST1	na	RT027	initial test set
472	684	1489	645	596	1431	1359	ERR026381	ST1	na	RT027	initial test set
346	637	1184	669	525	996	1812	ERR026382	ST1	na	RT027	initial test set
156	279	601	299	281	428	857	ERR026383	ST1	na	RT027	initial test set
343	373	632	340	357	753	711	ERR026384	ST1	na	RT027	initial test set
289	445	774	376	353	781	1298	ERR026386	ST1	na	RT027	initial test set
398	548	882	476	445	974	1473	ERR026387	ST1	na	RT027	initial test set
313	457	767	412	378	751	1410	ERR026388	ST1	na	RT027	initial test set
444	624	1012	598	497	1146	1095	ERR026389	ST1	na	RT027	initial test set
349	508	937	505	434	848	1605	ERR026391	ST1	na	RT027	initial test set
325	440	734	385	333	833	750	ERR026392	ST1	na	RT027	initial test set
310	339	656	306	265	729	659	ERR026393	ST1	na	RT027	initial test set
449	601	979	562	458	1002	1823	ERR026394	ST1	na	RT027	initial test set
333	427	757	412	362	910	842	ERR026395	ST1	na	RT027	initial test set
333	388	716	397	431	815	758	ERR026396	ST1	na	RT027	initial test set
317	429	690	486	387	920	765	ERR026397	ST1	na	RT027	initial test set
283	322	564	352	323	655	662	ERR026398	ST1	na	RT027	initial test set
359	527	928	456	458	949	989	ERR026399	ST1	na	RT027	initial test set
280	459	1033	482	438	793	1414	ERR026400	ST1	na	RT027	initial test set
620	937	1677	813	800	1667	1646	ERR026401	ST1	na	RT027	initial test set
361	539	809	505	439	1077	859	ERR026402	ST1	na	RT027	initial test set
407	576	1057	533	452	1048	1070	ERR026404	ST1	na	RT027	initial test set
253	406	602	309	296	616	656	ERR026405	ST1	na	RT027	initial test set
240	412	619	314	306	699	607	ERR026406	ST1	na	RT027	initial test set
361	516	860	475	391	937	873	ERR026407	ST1	na	RT027	initial test set
270	295	613	279	299	629	573	ERR026408	ST1	na	RT027	initial test set
212	246	614	275	280	635	542	ERR026409	ST1	na	RT027	initial test set
270	457	869	433	390	885	797	ERR026410	ST1	na	RT027	initial test set
251	341	496	311	304	627	542	ERR026411	ST1	na	RT027	initial test set
267	441	743	381	318	790	707	ERR026412	ST1	na	RT027	initial test set
434	495	983	421	450	1165	909	ERR026413	ST1	na	RT027	initial test set
354	515	819	454	394	886	1099	ERR026414	ST1	na	RT027	initial test set
349	415	818	445	379	928	762	ERR026415	ST1	na	RT027	initial test set
266	371	691	293	377	802	677	ERR026417	ST1	na	RT027	initial test set
213	318	726	373	335	819	804	ERR026418	ST1	na	RT027	initial test set
201	310	541	275	297	699	637	ERR026419	ST1	na	RT027	initial test set
318	402	734	406	403	964	786	ERR026422	ST1	na	RT027	initial test set
214	234	436	212	245	590	514	ERR026423	ST1	na	RT027	initial test set
177	228	472	217	176	484	445	ERR026424	ST1	na	RT027	initial test set
215	223	491	255	292	665	575	ERR026426	ST1	na	RT027	initial test set
237	433	729	363	322	654	624	ERR026830	ST1	na	RT027	initial test set
229	434	590	320	313	709	695	ERR026831	ST1	na	RT027	initial test set
286	385	606	282	311	822	602	ERR026832	ST1	na	RT027	initial test set
260	309	594	303	302	644	589	ERR026833	ST1	na	RT027	initial test set
307	364	648	288	295	837	663	ERR026834	ST1	na	RT027	initial test set
412	506	759	385	430	1065	695	ERR026835	ST1	na	RT027	initial test set
251	282	531	270	264	636	560	ERR026836	ST1	na	RT027	initial test set
252	406	633	313	326	641	617	ERR026837	ST1	na	RT027	initial test set
339	556	900	501	435	875	811	ERR026838	ST1	na	RT027	initial test set
240	315	577	342	239	717	559	ERR026839	ST1	na	RT027	initial test set
336	436	667	336	344	843	726	ERR026840	ST1	na	RT027	initial test set
172	340	462	224	275	549	422	ERR026841	ST1	na	RT027	initial test set
564	562	1005	477	512	1325	1052	ERR026843	ST1	na	RT027	initial test set
372	392	685	304	320	872	694	ERR026844	ST1	na	RT027	initial test set
407	570	1004	477	414	1175	1025	ERR026845	ST1	na	RT027	initial test set
409	446	725	393	366	872	746	ERR026847	ST1	na	RT027	initial test set
298	366	528	292	267	648	591	ERR026849	ST1	na	RT027	initial test set
356	379	714	353	309	894	778	ERR026850	ST1	na	RT027	initial test set
274	430	1198	382	373	659	776	ERR026852	ST1	na	RT027	initial test set
271	451	628	285	336	676	580	ERR026856	ST1	na	RT027	initial test set
245	297	595	308	293	637	625	ERR026857	ST1	na	RT027	initial test set
151	161	337	120	159	329	354	ERR026858	ST1	na	RT027	initial test set
250	308	489	246	281	665	441	ERR026859	ST1	na	RT027	initial test set
225	333	582	281	315	571	440	ERR026861	ST1	na	RT027	initial test set
94	205	266	133	137	346	206	ERR026862	ST1	na	RT027	initial test set
524	622	1095	634	588	1354	1129	ERR026863	ST1	na	RT027	initial test set
379	518	763	367	395	903	820	ERR026864	ST1	na	RT027	initial test set
360	414	796	333	366	893	859	ERR026865	ST1	na	RT027	initial test set
1143	1332	2294	1180	1115	2695	2278	ERR026866	ST1	na	RT027	initial test set
351	402	748	396	386	1002	755	ERR026867	ST1	na	RT027	initial test set
567	739	1038	527	548	1372	1061	ERR026869	ST1	na	RT027	initial test set
217	317	653	352	339	672	579	ERR026870	ST1	na	RT027	initial test set
429	669	1231	520	570	1119	923	ERR026871	ST1	na	RT027	initial test set
350	565	970	521	449	965	750	ERR026872	ST1	na	RT027	initial test set
374	431	779	331	353	878	783	ERR026873	ST1	na	RT027	initial test set
234	349	486	237	245	617	527	ERR026874	ST1	na	RT027	initial test set
359	653	1121	537	562	1182	876	ERR026875	ST1	na	RT027	initial test set
532	787	2011	743	583	1279	1293	ERR026876	ST1	na	RT027	initial test set
305	445	781	433	398	756	628	ERR026877	ST1	na	RT027	initial test set
32	78	147	63	72	135	118	ERR026878	ST1	na	RT027	initial test set
231	336	563	241	306	617	415	ERR026879	ST1	na	RT027	initial test set
373	548	929	452	459	1089	960	ERR026880	ST1	na	RT027	initial test set
433	554	1018	403	376	1145	841	ERR027376	ST1	na	RT027	initial test set
413	419	883	382	324	955	685	ERR027377	ST1	na	RT027	initial test set
277	318	873	299	236	531	491	ERR027385	ST1	na	RT027	initial test set
246	305	905	280	269	536	477	ERR027386	ST1	na	RT027	initial test set
303	315	610	249	254	735	601	ERR028721	ST1	na	RT027	initial test set
328	440	805	454	411	938	787	ERR028722	ST1	na	RT027	initial test set
519	834	1262	665	683	1548	1522	ERR028723	ST1	na	RT027	initial test set
481	720	1304	660	598	1461	1379	ERR028724	ST1	na	RT027	initial test set
367	430	755	376	388	1055	708	ERR028725	ST1	na	RT027	initial test set
351	361	753	297	356	763	1107	ERR028726	ST1	na	RT027	initial test set
401	467	909	413	426	925	983	ERR028727	ST1	na	RT027	initial test set
363	438	817	404	444	912	1379	ERR028728	ST1	na	RT027	initial test set
449	641	1264	593	600	1371	1138	ERR028729	ST1	na	RT027	initial test set
433	508	897	410	429	1072	843	ERR028730	ST1	na	RT027	initial test set
394	452	830	454	404	991	806	ERR028731	ST1	na	RT027	initial test set
202	278	409	219	222	470	517	ERR028732	ST1	na	RT027	initial test set
476	553	1117	439	512	1209	1035	ERR029481	ST1	na	RT027	initial test set
424	468	834	439	458	1073	938	ERR029482	ST1	na	RT027	initial test set
377	508	866	459	412	1131	859	ERR029483	ST1	na	RT027	initial test set
542	595	1094	539	511	1182	1058	ERR029484	ST1	na	RT027	initial test set
648	607	885	469	400	1060	888	ERR029485	ST1	na	RT027	initial test set
493	737	1833	597	598	1187	1194	ERR029486	ST1	na	RT027	initial test set
367	461	844	494	435	1183	926	ERR029487	ST1	na	RT027	initial test set
383	550	964	561	484	1288	1002	ERR029488	ST1	na	RT027	initial test set
531	761	1409	686	766	1478	1396	ERR029489	ST1	na	RT027	initial test set
454	490	1011	431	381	1116	908	ERR029490	ST1	na	RT027	initial test set
299	465	1550	709	573	1495	953	ERR029491	ST1	na	RT027	initial test set
571	590	1033	564	464	1355	995	ERR029492	ST1	na	RT027	initial test set
442	596	949	505	532	1263	996	ERR029494	ST1	na	RT027	initial test set
374	513	775	415	432	989	825	ERR029495	ST1	na	RT027	initial test set
326	403	673	384	303	815	781	ERR029496	ST1	na	RT027	initial test set
532	665	1169	578	580	1477	1095	ERR029497	ST1	na	RT027	initial test set
435	518	883	464	479	1063	914	ERR029498	ST1	na	RT027	initial test set
578	652	1268	639	615	1406	1216	ERR029499	ST1	na	RT027	initial test set
453	478	902	445	446	1075	853	ERR029500	ST1	na	RT027	initial test set
434	522	852	376	444	1049	881	ERR029501	ST1	na	RT027	initial test set
632	937	2656	750	810	1432	1724	ERR029502	ST1	na	RT027	initial test set
468	593	1015	523	506	1179	1111	ERR029503	ST1	na	RT027	initial test set
472	584	998	500	507	1139	1091	ERR029504	ST1	na	RT027	initial test set
627	653	1179	600	559	1499	1272	ERR029505	ST1	na	RT027	initial test set
457	525	1041	502	499	1234	876	ERR029507	ST1	na	RT027	initial test set
354	475	847	383	398	1087	832	ERR029508	ST1	na	RT027	initial test set
365	420	686	394	381	905	763	ERR029509	ST1	na	RT027	initial test set
526	644	1200	590	595	1508	1168	ERR029510	ST1	na	RT027	initial test set
452	599	1059	517	475	1242	1023	ERR029511	ST1	na	RT027	initial test set
477	603	1119	560	575	604	1694	ERR029512	ST1	na	RT027	initial test set
537	582	961	538	500	1255	1117	ERR029513	ST1	na	RT027	initial test set
406	496	793	417	421	1128	797	ERR029514	ST1	na	RT027	initial test set
673	749	1541	727	736	1754	1400	ERR029515	ST1	na	RT027	initial test set
477	584	1071	585	508	1284	981	ERR029516	ST1	na	RT027	initial test set
502	655	1137	573	547	1158	1016	ERR029517	ST1	na	RT027	initial test set
341	511	906	417	424	940	733	ERR029518	ST1	na	RT027	initial test set
400	510	908	460	441	1027	936	ERR029520	ST1	na	RT027	initial test set
558	644	1072	540	529	1315	990	ERR029523	ST1	na	RT027	initial test set
501	521	916	449	466	1094	857	ERR029524	ST1	na	RT027	initial test set
700	536	741	429	452	1462	783	ERR029525	ST1	na	RT027	initial test set
405	459	768	430	363	1032	816	ERR029526	ST1	na	RT027	initial test set
473	577	998	587	500	1369	1096	ERR029527	ST1	na	RT027	initial test set
553	580	1141	523	499	1312	1200	ERR029528	ST1	na	RT027	initial test set
656	737	1256	625	597	1549	1134	ERR029529	ST1	na	RT027	initial test set
493	595	1086	534	484	1321	906	ERR029531	ST1	na	RT027	initial test set
810	595	805	429	449	1178	831	ERR029533	ST1	na	RT027	initial test set
510	540	860	473	447	1152	901	ERR029534	ST1	na	RT027	initial test set
491	596	783	487	522	1218	1020	ERR029535	ST1	na	RT027	initial test set
488	516	927	376	279	1050	965	ERR029536	ST1	na	RT027	initial test set
412	433	727	364	349	936	759	ERR029537	ST1	na	RT027	initial test set
142	294	528	256	277	547	504	ERR029538	ST1	na	RT027	initial test set
436	518	406	432	412	1110	819	ERR029539	ST1	na	RT027	initial test set
384	387	695	383	371	913	782	ERR029540	ST1	na	RT027	initial test set
589	790	1238	652	687	1503	1287	ERR029541	ST1	na	RT027	initial test set
370	488	987	470	468	1127	941	ERR029542	ST1	na	RT027	initial test set
484	506	904	413	421	1122	848	ERR029544	ST1	na	RT027	initial test set
372	473	835	403	357	891	836	ERR030283	ST1	na	RT027	initial test set
319	399	716	362	371	891	643	ERR030284	ST1	na	RT027	initial test set
239	330	602	257	292	787	523	ERR030285	ST1	na	RT027	initial test set
350	494	867	393	415	1028	797	ERR030286	ST1	na	RT027	initial test set
466	550	908	473	434	1155	892	ERR030287	ST1	na	RT027	initial test set
399	478	829	517	418	1012	888	ERR030288	ST1	na	RT027	initial test set
445	575	1405	515	481	1035	927	ERR030289	ST1	na	RT027	initial test set
315	375	732	406	378	844	657	ERR030290	ST1	na	RT027	initial test set
630	647	1127	516	612	1418	1150	ERR030291	ST1	na	RT027	initial test set
427	547	956	425	477	1222	783	ERR030292	ST1	na	RT027	initial test set
508	557	871	495	440	1143	852	ERR030293	ST1	na	RT027	initial test set
375	487	921	423	414	997	861	ERR030294	ST1	na	RT027	initial test set
326	460	707	387	385	912	770	ERR030296	ST1	na	RT027	initial test set
321	334	563	327	279	752	534	ERR030297	ST1	na	RT027	initial test set
307	310	498	285	275	707	493	ERR030298	ST1	na	RT027	initial test set
493	596	1092	486	550	1322	1035	ERR030299	ST1	na	RT027	initial test set
429	456	559	272	387	1080	636	ERR030300	ST1	na	RT027	initial test set
450	476	897	474	440	1175	807	ERR030301	ST1	na	RT027	initial test set
349	441	832	318	343	795	737	ERR030302	ST1	na	RT027	initial test set
360	527	1408	406	402	786	798	ERR030303	ST1	na	RT027	initial test set
529	620	1094	568	510	1116	1131	ERR030304	ST1	na	RT027	initial test set
336	497	783	405	370	965	767	ERR030305	ST1	na	RT027	initial test set
557	600	981	464	430	1051	963	ERR030306	ST1	na	RT027	initial test set
376	429	755	372	373	926	737	ERR030307	ST1	na	RT027	initial test set
437	574	944	460	447	1032	981	ERR030309	ST1	na	RT027	initial test set
412	490	717	339	393	805	1426	ERR030310	ST1	na	RT027	initial test set
202	479	760	419	440	704	1133	ERR030311	ST1	na	RT027	initial test set
443	802	1493	717	752	1129	2204	ERR030312	ST1	na	RT027	initial test set
328	471	780	389	385	930	737	ERR030313	ST1	na	RT027	initial test set
375	501	847	389	442	1065	869	ERR030314	ST1	na	RT027	initial test set
365	523	744	376	413	807	1263	ERR030315	ST1	na	RT027	initial test set
323	442	691	355	366	823	739	ERR030316	ST1	na	RT027	initial test set
425	553	1058	502	550	1064	1736	ERR030318	ST1	na	RT027	initial test set
363	483	782	497	430	920	1038	ERR030319	ST1	na	RT027	initial test set
382	517	873	405	411	877	1341	ERR030320	ST1	na	RT027	initial test set
237	236	417	226	231	569	389	ERR030322	ST1	na	RT027	initial test set
431	576	1052	523	473	1152	821	ERR030323	ST1	na	RT027	initial test set
302	441	845	359	359	949	735	ERR030324	ST1	na	RT027	initial test set
680	799	1511	672	762	1662	1390	ERR030325	ST1	na	RT027	initial test set
316	381	542	339	336	901	573	ERR030326	ST1	na	RT027	initial test set
440	548	927	523	507	1142	1014	ERR030327	ST1	na	RT027	initial test set
353	440	718	353	362	828	764	ERR030328	ST1	na	RT027	initial test set
268	358	611	335	320	808	627	ERR030329	ST1	na	RT027	initial test set
706	857	1709	773	768	1740	1485	ERR030330	ST1	na	RT027	initial test set
397	610	1785	559	527	949	1110	ERR030331	ST1	na	RT027	initial test set
234	376	621	346	296	797	618	ERR030333	ST1	na	RT027	initial test set
330	453	846	409	381	881	711	ERR030335	ST1	na	RT027	initial test set
376	574	971	563	511	1238	1060	ERR030336	ST1	na	RT027	initial test set
326	401	724	363	386	849	685	ERR030337	ST1	na	RT027	initial test set
181	259	386	213	232	505	394	ERR030338	ST1	na	RT027	initial test set
347	434	695	334	308	821	604	ERR030339	ST1	na	RT027	initial test set
465	639	1045	581	574	1361	1209	ERR030340	ST1	na	RT027	initial test set
354	404	754	346	338	769	766	ERR030341	ST1	na	RT027	initial test set
392	460	807	378	475	1041	828	ERR030342	ST1	na	RT027	initial test set
432	523	909	477	408	1112	795	ERR030344	ST1	na	RT027	initial test set
359	458	818	405	418	1011	821	ERR030345	ST1	na	RT027	initial test set
391	491	960	481	465	1007	911	ERR030346	ST1	na	RT027	initial test set
157	173	311	130	137	342	279	ERR030348	ST1	na	RT027	initial test set
329	405	633	333	333	748	656	ERR030349	ST1	na	RT027	initial test set
346	471	678	361	397	790	736	ERR030350	ST1	na	RT027	initial test set
282	338	576	309	292	693	551	ERR030351	ST1	na	RT027	initial test set
406	432	832	459	451	940	727	ERR030352	ST1	na	RT027	initial test set
344	579	896	457	449	1043	860	ERR030353	ST1	na	RT027	initial test set
319	410	668	386	354	823	744	ERR030354	ST1	na	RT027	initial test set
285	349	598	315	307	789	561	ERR030355	ST1	na	RT027	initial test set
328	533	959	477	446	1156	843	ERR030357	ST1	na	RT027	initial test set
298	470	866	440	409	865	849	ERR030358	ST1	na	RT027	initial test set
416	475	759	387	363	913	721	ERR030359	ST1	na	RT027	initial test set
393	510	842	428	449	964	847	ERR030361	ST1	na	RT027	initial test set
369	453	846	359	376	915	810	ERR030362	ST1	na	RT027	initial test set
336	402	615	350	299	774	641	ERR030363	ST1	na	RT027	initial test set
147	240	426	187	220	469	439	ERR030364	ST1	na	RT027	initial test set
344	440	679	423	388	941	734	ERR030365	ST1	na	RT027	initial test set
328	452	729	419	393	891	718	ERR030366	ST1	na	RT027	initial test set
583	575	1105	560	566	1337	1071	ERR030367	ST1	na	RT027	initial test set
337	482	841	424	418	1040	776	ERR030368	ST1	na	RT027	initial test set
473	598	1122	541	518	1316	975	ERR030370	ST1	na	RT027	initial test set
326	566	813	415	452	925	866	ERR030371	ST1	na	RT027	initial test set
485	512	773	551	456	987	919	ERR030372	ST1	na	RT027	initial test set
613	647	1008	550	520	1132	1733	ERR030374	ST1	na	RT027	initial test set
400	405	764	388	390	876	664	ERR030375	ST1	na	RT027	initial test set
374	399	741	369	377	860	714	ERR030376	ST1	na	RT027	initial test set
293	439	1491	600	521	1276	810	ERR030377	ST1	na	RT027	initial test set
446	488	815	424	422	966	790	ERR030378	ST1	na	RT027	initial test set
481	557	1060	452	440	1122	937	ERR030379	ST1	na	RT027	initial test set
359	536	802	424	440	996	877	ERR030380	ST1	na	RT027	initial test set
272	429	750	339	352	673	620	ERR030381	ST1	na	RT027	initial test set
535	529	1149	503	479	884	1631	ERR030384	ST1	na	RT027	initial test set
438	486	912	460	391	986	856	ERR030385	ST1	na	RT027	initial test set
428	449	891	430	429	881	935	ERR030387	ST1	na	RT027	initial test set
432	612	990	513	535	1154	949	ERR030388	ST1	na	RT027	initial test set
365	488	744	383	427	883	843	ERR030389	ST1	na	RT027	initial test set
565	677	1245	649	703	1480	1296	ERR030390	ST1	na	RT027	initial test set
335	486	932	432	441	1003	896	ERR030391	ST1	na	RT027	initial test set
336	456	788	445	425	918	904	ERR030392	ST1	na	RT027	initial test set
359	449	820	404	420	839	823	ERR030393	ST1	na	RT027	initial test set
451	541	889	513	502	1216	929	ERR030394	ST1	na	RT027	initial test set
679	962	1871	865	881	1887	1736	ERR030395	ST1	na	RT027	initial test set
340	510	944	437	458	1027	843	ERR030396	ST1	na	RT027	initial test set
353	469	753	412	425	943	804	ERR030397	ST1	na	RT027	initial test set
382	484	975	517	497	1036	881	ERR030398	ST1	na	RT027	initial test set
527	620	1687	526	465	923	1062	ERR031674	ST1	na	RT027	initial test set
431	523	950	406	406	1080	887	ERR031675	ST1	na	RT027	initial test set
298	426	723	357	383	906	694	ERR031676	ST1	na	RT027	initial test set
541	568	986	489	523	1226	932	ERR031677	ST1	na	RT027	initial test set
564	611	987	515	522	1261	1104	ERR031678	ST1	na	RT027	initial test set
585	574	1113	567	496	1229	1083	ERR031680	ST1	na	RT027	initial test set
345	450	813	449	450	941	808	ERR031681	ST1	na	RT027	initial test set
537	803	1563	728	621	1489	1611	ERR031682	ST1	na	RT027	initial test set
443	490	836	412	425	1150	827	ERR031683	ST1	na	RT027	initial test set
442	608	999	563	541	1204	1059	ERR031685	ST1	na	RT027	initial test set
646	791	1441	679	646	1648	1306	ERR031687	ST1	na	RT027	initial test set
365	489	739	394	386	925	717	ERR031689	ST1	na	RT027	initial test set
590	664	1308	649	618	1512	1239	ERR031690	ST1	na	RT027	initial test set
496	579	987	539	476	1147	910	ERR031691	ST1	na	RT027	initial test set
441	570	961	469	459	1223	958	ERR031692	ST1	na	RT027	initial test set
428	483	905	434	416	944	882	ERR031693	ST1	na	RT027	initial test set
341	374	705	376	324	769	706	ERR031694	ST1	na	RT027	initial test set
440	559	861	420	453	1038	817	ERR031695	ST1	na	RT027	initial test set
329	428	738	364	347	870	723	ERR031696	ST1	na	RT027	initial test set
456	566	944	437	465	1052	855	ERR031697	ST1	na	RT027	initial test set
409	554	866	364	401	1040	836	ERR031698	ST1	na	RT027	initial test set
436	570	863	477	397	1012	840	ERR031700	ST1	na	RT027	initial test set
519	532	920	549	490	1162	934	ERR031701	ST1	na	RT027	initial test set
297	444	745	390	348	956	730	ERR031702	ST1	na	RT027	initial test set
886	972	1593	751	841	1806	1574	ERR031703	ST1	na	RT027	initial test set
359	465	897	445	421	918	893	ERR031704	ST1	na	RT027	initial test set
492	447	844	356	333	826	814	ERR031705	ST1	na	RT027	initial test set
331	402	812	354	344	945	764	ERR031706	ST1	na	RT027	initial test set
349	359	1044	310	317	539	687	ERR031707	ST1	na	RT027	initial test set
453	513	968	425	450	939	916	ERR031708	ST1	na	RT027	initial test set
402	395	814	386	390	950	815	ERR031709	ST1	na	RT027	initial test set
364	528	847	389	367	982	747	ERR031710	ST1	na	RT027	initial test set
396	486	905	454	403	1062	886	ERR031711	ST1	na	RT027	initial test set
1470	1730	2945	1487	1482	3569	2759	ERR044801	ST1	na	RT027	initial test set
501	634	1065	527	543	1289	965	ERR044802	ST1	na	RT027	initial test set
570	616	1069	551	505	1490	933	ERR044803	ST1	na	RT027	initial test set
1019	1226	2122	1066	1019	2498	2117	ERR044804	ST1	na	RT027	initial test set
524	819	1328	713	708	1407	1127	ERR044805	ST1	na	RT027	initial test set
947	1181	1903	946	983	2303	2050	ERR044806	ST1	na	RT027	initial test set
870	975	1703	1000	920	2198	1648	ERR044807	ST1	na	RT027	initial test set
444	701	1012	544	510	1221	972	ERR044808	ST1	na	RT027	initial test set
95	502	1262	488	500	1092	971	ERR044809	ST1	na	RT027	initial test set
788	994	1917	893	890	2649	292	ERR044812	ST1	na	0	initial test set
936	1175	3280	1013	1014	1880	2230	ERR044813	ST1	na	RT027	initial test set
498	705	1259	529	557	1413	1166	ERR044814	ST1	na	RT027	initial test set
575	873	1608	642	726	1851	1389	ERR044815	ST1	na	RT027	initial test set
550	749	1282	632	626	1570	1244	ERR044816	ST1	na	RT027	initial test set
588	704	1169	568	553	1566	1125	ERR044817	ST1	na	RT027	initial test set
533	620	1027	482	508	1288	961	ERR044818	ST1	na	RT027	initial test set
957	1256	2012	938	990	2489	1920	ERR044819	ST1	na	RT027	initial test set
542	635	1078	592	530	1437	1053	ERR044820	ST1	na	RT027	initial test set
1209	1596	2567	1321	1316	3133	2659	ERR044821	ST1	na	RT027	initial test set
624	749	1433	668	682	1647	1341	ERR044822	ST1	na	RT027	initial test set
784	968	1560	802	823	2004	1485	ERR044823	ST1	na	RT027	initial test set
579	643	1311	616	590	1652	1297	ERR044824	ST1	na	RT027	initial test set
974	1288	2142	1006	959	2605	1804	ERR044825	ST1	na	RT027	initial test set
818	899	701	710	724	1636	1375	ERR044826	ST1	na	RT027	initial test set
6947	8681	13667	7052	6763	16625	12909	ERR044827	ST1	na	RT027	initial test set
810	2345	2844	1449	1332	3434	1986	ERR044828	ST1	na	RT027	initial test set
584	789	660	567	575	1476	1145	ERR044829	ST1	na	RT027	initial test set
596	862	1251	726	677	1582	1328	ERR044830	ST1	na	RT027	initial test set
680	978	1495	757	732	1849	1366	ERR044831	ST1	na	RT027	initial test set
655	888	1435	734	712	1753	1471	ERR044832	ST1	na	RT027	initial test set
2101	2523	1990	2074	1888	4726	3798	ERR044833	ST1	na	RT027	initial test set
653	800	1396	672	638	1622	1342	ERR044834	ST1	na	RT027	initial test set
1834	2049	3378	1670	1683	4036	3476	ERR044835	ST1	na	RT027	initial test set
1672	2015	3332	1694	1703	3720	3302	ERR044837	ST1	na	RT027	initial test set
958	1157	1752	924	919	2187	1627	ERR044838	ST1	na	RT027	initial test set
1457	1868	3111	1430	1463	3439	2707	ERR044839	ST1	na	RT027	initial test set
1160	1421	2282	1155	1071	2618	2099	ERR044840	ST1	na	RT027	initial test set
1644	2083	3447	1690	1667	3841	3375	ERR044841	ST1	na	RT027	initial test set
941	1088	1792	866	860	2010	1679	ERR044842	ST1	na	RT027	initial test set
1587	2022	3144	1461	1433	3803	2672	ERR044843	ST1	na	RT027	initial test set
679	926	1325	807	760	1747	1404	ERR044844	ST1	na	RT027	initial test set
805	1040	1744	832	785	1960	1591	ERR044845	ST1	na	RT027	initial test set
1307	1607	2758	1354	1292	3269	2662	ERR044847	ST1	na	RT027	initial test set
1250	1516	2412	1226	1088	2798	2238	ERR044848	ST1	na	RT027	initial test set
270	298	539	280	206	531	416	ERR1256644	ST1	na	RT027	initial test set
409	489	792	423	366	988	744	ERR125924	ST1	na	RT027	initial test set
283	774	805	531	445	1136	650	ERR125938	ST1	na	RT027	initial test set
426	475	677	390	361	855	710	ERR125940	ST1	na	RT027	initial test set
578	633	1049	497	512	1337	1033	ERR125941	ST1	na	RT027	initial test set
521	532	891	433	373	1065	873	ERR125943	ST1	na	RT027	initial test set
350	420	702	365	291	766	642	ERR125944	ST1	na	RT027	initial test set
474	540	909	440	420	1052	922	ERR125945	ST1	na	RT027	initial test set
706	593	877	406	516	1404	806	ERR125946	ST1	na	RT027	initial test set
572	651	1580	770	619	1684	1099	ERR125947	ST1	na	RT027	initial test set
536	669	1201	573	531	1230	1131	ERR125948	ST1	na	RT027	initial test set
673	805	1277	561	595	1470	1203	ERR125949	ST1	na	RT027	initial test set
723	742	1319	684	587	1557	1268	ERR125950	ST1	na	RT027	initial test set
562	716	1129	523	492	1328	1073	ERR125952	ST1	na	RT027	initial test set
808	914	1432	635	666	1755	1501	ERR125953	ST1	na	RT027	initial test set
641	794	2469	1083	786	2325	1404	ERR125954	ST1	na	RT027	initial test set
964	849	1235	659	645	1758	1178	ERR125955	ST1	na	RT027	initial test set
322	419	777	348	368	834	710	ERR125963	ST1	na	RT027	initial test set
356	437	1278	617	461	1229	737	ERR125964	ST1	na	RT027	initial test set
434	408	648	269	321	693	687	ERR125975	ST1	na	RT027	initial test set
460	369	662	316	323	1022	585	ERR125978	ST1	na	RT027	initial test set
734	530	804	371	425	1137	783	ERR125979	ST1	na	RT027	initial test set
619	632	878	407	511	1320	857	ERR125991	ST1	na	RT027	initial test set
407	389	497	244	315	823	465	ERR125992	ST1	na	RT027	initial test set
184	160	331	159	130	340	299	ERR1544877	ST1	na	RT027	initial test set
60	202	335	129	139	367	226	ERR1544880	ST1	na	RT027	initial test set
128	152	326	135	124	331	312	ERR1544881	ST1	na	RT027	initial test set
148	120	253	93	113	218	197	ERR1544882	ST1	na	RT027	initial test set
296	270	605	253	226	683	523	ERR1544883	ST1	na	RT027	initial test set
263	291	550	226	206	593	546	ERR1544885	ST1	na	RT027	initial test set
195	221	840	313	232	783	497	ERR1544888	ST1	na	RT027	initial test set
262	258	675	221	196	382	363	ERR171284	ST1	na	RT027	initial test set
1492	2165	3941	1982	1523	4377	2830	ERR1853156	ST1	na	RT027	initial test set
2436	3479	6881	3373	2455	7207	4946	ERR1853181	ST1	na	RT027	initial test set
219	276	548	257	260	644	434	ERR248711	ST1	na	RT027	initial test set
213	212	404	233	217	474	370	ERR248712	ST1	na	RT027	initial test set
166	219	475	216	224	465	498	ERR248713	ST1	na	RT027	initial test set
268	347	686	334	317	654	686	ERR248714	ST1	na	RT027	initial test set
274	270	558	318	264	674	445	ERR248716	ST1	na	RT027	initial test set
236	374	595	341	287	619	598	ERR248718	ST1	na	RT027	initial test set
216	303	517	234	265	583	454	ERR248719	ST1	na	RT027	initial test set
298	424	732	386	346	773	662	ERR248720	ST1	na	RT027	initial test set
228	270	506	243	226	540	440	ERR248721	ST1	na	RT027	initial test set
264	329	671	277	292	640	533	ERR248722	ST1	na	RT027	initial test set
202	254	523	203	203	491	412	ERR248723	ST1	na	RT027	initial test set
196	286	506	226	241	597	448	ERR248724	ST1	na	RT027	initial test set
211	287	519	219	248	556	430	ERR248725	ST1	na	RT027	initial test set
185	198	436	236	200	440	395	ERR248726	ST1	na	RT027	initial test set
202	257	504	271	282	539	512	ERR248727	ST1	na	RT027	initial test set
355	460	867	425	431	828	865	ERR248728	ST1	na	RT027	initial test set
264	334	623	315	315	593	615	ERR248729	ST1	na	RT027	initial test set
198	253	434	216	210	481	427	ERR248730	ST1	na	RT027	initial test set
209	308	578	285	253	653	634	ERR248731	ST1	na	RT027	initial test set
197	245	502	254	258	449	511	ERR248732	ST1	na	RT027	initial test set
184	312	460	222	219	489	429	ERR248733	ST1	na	RT027	initial test set
168	249	391	211	190	430	406	ERR248734	ST1	na	RT027	initial test set
381	491	965	415	417	936	770	ERR248735	ST1	na	RT027	initial test set
379	504	734	441	400	758	868	ERR248736	ST1	na	RT027	initial test set
275	362	787	441	348	705	738	ERR248737	ST1	na	RT027	initial test set
194	288	455	296	231	603	507	ERR248738	ST1	na	RT027	initial test set
290	405	733	318	356	717	675	ERR248739	ST1	na	RT027	initial test set
250	299	521	275	250	646	468	ERR248740	ST1	na	RT027	initial test set
170	207	444	202	199	422	357	ERR248741	ST1	na	RT027	initial test set
307	320	715	329	324	688	699	ERR248742	ST1	na	RT027	initial test set
327	431	667	388	389	717	648	ERR248743	ST1	na	RT027	initial test set
508	660	1381	655	618	1416	1281	ERR248744	ST1	na	RT027	initial test set
267	348	794	387	318	761	766	ERR248745	ST1	na	RT027	initial test set
442	589	1012	537	549	1042	1010	ERR248746	ST1	na	RT027	initial test set
329	381	683	354	318	642	718	ERR248747	ST1	na	RT027	initial test set
248	324	590	364	297	628	626	ERR248748	ST1	na	RT027	initial test set
193	250	478	210	228	468	440	ERR248749	ST1	na	RT027	initial test set
282	266	641	340	299	611	593	ERR248750	ST1	na	RT027	initial test set
556	706	1331	691	597	1414	1199	ERR248751	ST1	na	RT027	initial test set
381	601	1033	605	494	1096	1034	ERR248752	ST1	na	RT027	initial test set
255	350	643	336	305	662	683	ERR248753	ST1	na	RT027	initial test set
308	383	678	293	309	717	609	ERR248754	ST1	na	RT027	initial test set
203	360	540	295	290	671	520	ERR248755	ST1	na	RT027	initial test set
370	479	813	472	350	732	748	ERR248756	ST1	na	RT027	initial test set
215	312	699	315	291	603	677	ERR248757	ST1	na	RT027	initial test set
281	373	661	375	323	635	657	ERR248758	ST1	na	RT027	initial test set
294	400	722	339	359	748	710	ERR248759	ST1	na	RT027	initial test set
283	341	646	293	342	725	644	ERR248760	ST1	na	RT027	initial test set
269	329	645	286	332	677	569	ERR248761	ST1	na	RT027	initial test set
627	838	1353	638	633	1372	1336	ERR248762	ST1	na	RT027	initial test set
380	480	919	438	439	895	846	ERR248763	ST1	na	RT027	initial test set
183	250	431	206	177	486	399	ERR248764	ST1	na	RT027	initial test set
168	257	430	218	203	381	402	ERR248765	ST1	na	RT027	initial test set
184	227	447	212	195	443	366	ERR248766	ST1	na	RT027	initial test set
262	307	459	213	217	521	476	ERR248767	ST1	na	RT027	initial test set
236	319	555	254	241	539	466	ERR248768	ST1	na	RT027	initial test set
157	174	375	181	168	384	323	ERR248769	ST1	na	RT027	initial test set
181	220	367	182	143	365	314	ERR248770	ST1	na	RT027	initial test set
134	204	390	175	162	437	337	ERR248771	ST1	na	RT027	initial test set
200	229	366	209	164	341	389	ERR248772	ST1	na	RT027	initial test set
193	299	442	198	177	503	378	ERR248773	ST1	na	RT027	initial test set
179	163	326	131	147	307	328	ERR248774	ST1	na	RT027	initial test set
174	192	366	185	166	386	361	ERR248775	ST1	na	RT027	initial test set
170	192	306	193	163	356	318	ERR248776	ST1	na	RT027	initial test set
150	168	310	159	133	351	228	ERR248777	ST1	na	RT027	initial test set
131	177	282	168	133	320	328	ERR248778	ST1	na	RT027	initial test set
373	413	781	330	332	883	831	ERR251715	ST1	na	RT027	initial test set
493	383	638	296	350	1095	584	ERR251719	ST1	na	RT027	initial test set
291	338	625	285	263	703	590	ERR251725	ST1	na	RT027	initial test set
247	269	503	228	201	601	474	ERR251729	ST1	na	RT027	initial test set
258	263	580	264	260	631	582	ERR251730	ST1	na	RT027	initial test set
440	370	914	261	8	905	579	ERR251732	ST1	na	0	initial test set
424	541	957	467	450	1098	976	ERR251734	ST1	na	RT027	initial test set
214	312	591	267	238	606	556	ERR251740	ST1	na	RT027	initial test set
261	322	541	261	217	595	527	ERR251742	ST1	na	RT027	initial test set
363	365	608	284	355	1076	492	ERR251744	ST1	na	RT027	initial test set
635	747	1293	696	631	1498	1353	ERR251747	ST1	na	RT027	initial test set
259	290	518	279	224	534	540	ERR251751	ST1	na	RT027	initial test set
471	505	915	431	404	1019	777	ERR251756	ST1	na	RT027	initial test set
275	339	632	270	274	699	497	ERR251757	ST1	na	RT027	initial test set
328	363	755	342	366	838	707	ERR251758	ST1	na	RT027	initial test set
244	277	495	218	224	612	453	ERR251767	ST1	na	RT027	initial test set
400	488	882	399	399	1072	774	ERR251768	ST1	na	RT027	initial test set
306	332	654	270	253	636	615	ERR251770	ST1	na	RT027	initial test set
267	359	609	297	318	691	606	ERR251775	ST1	na	RT027	initial test set
199	276	463	218	216	507	420	ERR251776	ST1	na	RT027	initial test set
309	393	698	332	330	791	595	ERR251785	ST1	na	RT027	initial test set
233	237	534	252	243	556	453	ERR251790	ST1	na	RT027	initial test set
226	264	559	275	243	614	419	ERR251791	ST1	na	RT027	initial test set
300	372	728	337	307	797	664	ERR251805	ST1	na	RT027	initial test set
337	451	811	443	375	775	873	ERR251823	ST1	na	RT027	initial test set
558	767	1305	581	615	1324	1150	ERR251829	ST1	na	RT027	initial test set
296	345	715	300	329	644	578	ERR251831	ST1	na	RT027	initial test set
457	510	840	502	429	1046	788	ERR251834	ST1	na	RT027	initial test set
333	432	766	379	342	946	720	ERR251841	ST1	na	RT027	initial test set
364	408	825	405	388	932	747	ERR251857	ST1	na	RT027	initial test set
344	400	750	350	383	709	736	ERR251864	ST1	na	RT027	initial test set
344	456	762	453	371	815	779	ERR251867	ST1	na	RT027	initial test set
119	108	239	89	111	312	213	ERR277253	ST1	na	RT027	initial test set
168	162	273	140	154	488	14	ERR277254	ST1	na	0	initial test set
83	92	253	113	127	304	236	ERR277256	ST1	na	RT027	initial test set
137	143	292	134	155	420	275	ERR277258	ST1	na	RT027	initial test set
108	124	218	119	105	305	271	ERR277259	ST1	na	RT027	initial test set
131	143	319	107	145	522	19	ERR277260	ST1	na	0	initial test set
111	104	201	120	89	360	211	ERR277262	ST1	na	RT027	initial test set
164	219	352	178	174	493	369	ERR277264	ST1	na	RT027	initial test set
113	123	227	115	126	394	13	ERR277271	ST1	na	0	initial test set
269	247	569	289	220	607	323	ERR339502	ST1	na	RT027	initial test set
265	290	647	251	237	681	524	ERR339517	ST1	na	RT027	initial test set
399	399	744	354	365	938	641	ERR339518	ST1	na	RT027	initial test set
163	448	661	310	255	727	433	ERR339520	ST1	na	RT027	initial test set
107	208	381	200	147	456	288	ERR339521	ST1	na	RT027	initial test set
211	213	576	229	242	542	467	ERR339523	ST1	na	RT027	initial test set
305	295	601	277	274	688	638	ERR339525	ST1	na	RT027	initial test set
226	236	461	235	248	554	479	ERR339526	ST1	na	RT027	initial test set
191	172	397	149	158	354	328	ERR339527	ST1	na	RT027	initial test set
157	234	651	272	231	637	444	ERR339528	ST1	na	RT027	initial test set
313	306	510	258	242	556	545	ERR339529	ST1	na	RT027	initial test set
293	328	544	271	252	553	532	ERR339530	ST1	na	RT027	initial test set
245	283	493	251	251	540	536	ERR339535	ST1	na	RT027	initial test set
165	169	246	155	157	296	286	ERR339538	ST1	na	RT027	initial test set
221	272	504	218	236	568	519	ERR339539	ST1	na	RT027	initial test set
281	358	660	294	285	741	724	ERR339670	ST1	na	RT027	initial test set
283	409	873	301	345	893	797	ERR339674	ST1	na	RT027	initial test set
501	551	1021	464	440	1097	1045	ERR339676	ST1	na	RT027	initial test set
400	543	1012	503	465	1169	979	ERR339680	ST1	na	RT027	initial test set
270	311	506	265	230	525	528	ERR339684	ST1	na	RT027	initial test set
337	401	702	374	338	793	714	ERR339688	ST1	na	RT027	initial test set
204	327	642	277	273	687	559	ERR339699	ST1	na	RT027	initial test set
230	280	523	231	242	601	468	ERR339702	ST1	na	RT027	initial test set
278	356	658	306	305	692	629	ERR339709	ST1	na	RT027	initial test set
229	282	475	269	214	493	509	ERR339711	ST1	na	RT027	initial test set
254	374	713	314	319	771	620	ERR339713	ST1	na	RT027	initial test set
272	312	567	271	219	593	552	ERR339714	ST1	na	RT027	initial test set
340	387	732	333	318	768	660	ERR339715	ST1	na	RT027	initial test set
203	259	417	245	209	518	417	ERR339749	ST1	na	RT027	initial test set
308	298	492	211	240	630	427	ERR339750	ST1	na	RT027	initial test set
313	337	614	284	267	591	650	ERR339751	ST1	na	RT027	initial test set
330	380	667	332	339	724	626	ERR339752	ST1	na	RT027	initial test set
526	687	1143	563	532	1212	1202	ERR339753	ST1	na	RT027	initial test set
273	328	564	284	277	611	543	ERR339754	ST1	na	RT027	initial test set
282	313	601	333	288	713	580	ERR339755	ST1	na	RT027	initial test set
260	355	665	273	312	795	590	ERR339756	ST1	na	RT027	initial test set
285	307	518	282	270	640	559	ERR339757	ST1	na	RT027	initial test set
321	363	557	251	246	686	417	ERR339758	ST1	na	RT027	initial test set
293	327	574	274	260	676	532	ERR339759	ST1	na	RT027	initial test set
288	354	655	324	325	734	584	ERR339760	ST1	na	RT027	initial test set
265	389	538	262	252	637	527	ERR339762	ST1	na	RT027	initial test set
434	466	838	344	381	982	763	ERR339763	ST1	na	RT027	initial test set
393	419	908	457	394	999	819	ERR339764	ST1	na	RT027	initial test set
571	556	1128	474	491	1261	924	ERR339765	ST1	na	RT027	initial test set
301	348	702	357	283	800	608	ERR339767	ST1	na	RT027	initial test set
387	402	813	378	361	867	760	ERR339768	ST1	na	RT027	initial test set
320	349	614	273	302	827	534	ERR339769	ST1	na	RT027	initial test set
460	561	1022	461	486	1167	911	ERR339770	ST1	na	RT027	initial test set
247	315	528	249	205	612	538	ERR339772	ST1	na	RT027	initial test set
416	519	999	367	402	1011	911	ERR339773	ST1	na	RT027	initial test set
221	289	462	291	197	614	412	ERR339774	ST1	na	RT027	initial test set
331	307	496	211	268	625	513	ERR339776	ST1	na	RT027	initial test set
398	400	691	386	353	904	723	ERR339777	ST1	na	RT027	initial test set
239	224	395	166	214	540	426	ERR339779	ST1	na	RT027	initial test set
368	293	592	320	254	706	557	ERR339780	ST1	na	RT027	initial test set
216	255	419	214	185	460	426	ERR339781	ST1	na	RT027	initial test set
219	277	509	188	250	549	483	ERR339782	ST1	na	RT027	initial test set
255	310	713	378	281	804	443	ERR339783	ST1	na	RT027	initial test set
337	320	704	271	289	756	617	ERR339784	ST1	na	RT027	initial test set
331	481	816	394	354	837	664	ERR339786	ST1	na	RT027	initial test set
231	327	530	304	240	626	508	ERR339787	ST1	na	RT027	initial test set
464	563	1100	529	458	1176	951	ERR339790	ST1	na	RT027	initial test set
216	295	985	459	343	1039	618	ERR339791	ST1	na	RT027	initial test set
432	420	881	426	429	968	979	ERR339792	ST1	na	RT027	initial test set
321	289	523	260	213	656	522	ERR339793	ST1	na	RT027	initial test set
276	310	741	345	318	920	454	ERR339794	ST1	na	RT027	initial test set
372	374	768	362	361	820	766	ERR339795	ST1	na	RT027	initial test set
408	434	819	367	357	1005	729	ERR339797	ST1	na	RT027	initial test set
307	325	625	301	294	673	630	ERR339798	ST1	na	RT027	initial test set
400	421	707	354	321	871	754	ERR339800	ST1	na	RT027	initial test set
391	485	904	360	384	965	842	ERR339826	ST1	na	RT027	initial test set
352	421	755	370	362	916	687	ERR339827	ST1	na	RT027	initial test set
410	350	612	264	251	705	474	ERR339828	ST1	na	RT027	initial test set
420	494	961	439	444	1055	917	ERR339829	ST1	na	RT027	initial test set
339	315	625	318	285	730	590	ERR339830	ST1	na	RT027	initial test set
496	530	985	454	487	1129	881	ERR339831	ST1	na	RT027	initial test set
281	319	710	265	310	693	571	ERR339832	ST1	na	RT027	initial test set
303	319	612	266	287	550	670	ERR339833	ST1	na	RT027	initial test set
303	406	703	305	324	785	663	ERR339834	ST1	na	RT027	initial test set
213	343	1006	466	345	862	654	ERR339835	ST1	na	RT027	initial test set
197	300	592	288	268	652	495	ERR339836	ST1	na	RT027	initial test set
246	327	527	284	264	581	598	ERR339837	ST1	na	RT027	initial test set
313	354	680	377	315	782	702	ERR339838	ST1	na	RT027	initial test set
286	448	733	345	299	773	720	ERR339839	ST1	na	RT027	initial test set
431	611	1146	532	470	1030	977	ERR339840	ST1	na	RT027	initial test set
345	407	908	401	396	888	697	ERR339841	ST1	na	RT027	initial test set
420	466	689	355	401	1148	610	ERR339842	ST1	na	RT027	initial test set
289	362	661	269	305	726	652	ERR339843	ST1	na	RT027	initial test set
368	423	833	400	380	846	721	ERR339844	ST1	na	RT027	initial test set
468	576	1137	526	495	1223	1110	ERR339845	ST1	na	RT027	initial test set
220	262	515	224	209	539	504	ERR339846	ST1	na	RT027	initial test set
296	359	744	349	333	772	583	ERR339847	ST1	na	RT027	initial test set
288	361	681	346	317	767	689	ERR339848	ST1	na	RT027	initial test set
267	395	702	337	335	865	593	ERR339849	ST1	na	RT027	initial test set
340	275	624	311	262	722	594	ERR339850	ST1	na	RT027	initial test set
337	340	655	300	334	812	649	ERR339851	ST1	na	RT027	initial test set
328	360	687	340	320	802	617	ERR339852	ST1	na	RT027	initial test set
283	273	543	262	258	664	464	ERR339853	ST1	na	RT027	initial test set
282	378	732	379	376	769	674	ERR339854	ST1	na	RT027	initial test set
275	302	589	295	286	749	493	ERR339855	ST1	na	RT027	initial test set
179	245	486	238	210	596	442	ERR339856	ST1	na	RT027	initial test set
465	509	969	418	436	1018	946	ERR339857	ST1	na	RT027	initial test set
342	425	789	349	281	908	697	ERR339858	ST1	na	RT027	initial test set
469	461	1415	406	7	1050	895	ERR339859	ST1	na	0	initial test set
429	511	1414	435	11	1110	929	ERR339860	ST1	na	0	initial test set
415	488	1694	684	597	1567	986	ERR339861	ST1	na	RT027	initial test set
352	317	709	320	301	899	641	ERR339862	ST1	na	RT027	initial test set
343	419	804	400	371	802	781	ERR339863	ST1	na	RT027	initial test set
340	449	857	409	378	926	755	ERR339864	ST1	na	RT027	initial test set
289	291	641	305	247	660	668	ERR339865	ST1	na	RT027	initial test set
275	324	640	266	300	635	567	ERR339866	ST1	na	RT027	initial test set
215	295	594	241	269	713	636	ERR339867	ST1	na	RT027	initial test set
267	320	622	244	264	679	560	ERR339868	ST1	na	RT027	initial test set
282	342	678	297	301	670	638	ERR339869	ST1	na	RT027	initial test set
569	672	1342	595	629	1387	1265	ERR339870	ST1	na	RT027	initial test set
486	593	1048	521	450	1134	1038	ERR339871	ST1	na	RT027	initial test set
346	447	754	356	341	863	757	ERR339872	ST1	na	RT027	initial test set
303	408	757	375	355	761	735	ERR339873	ST1	na	RT027	initial test set
342	408	711	394	327	804	721	ERR339874	ST1	na	RT027	initial test set
503	603	1182	550	515	1214	1104	ERR339875	ST1	na	RT027	initial test set
355	414	830	394	413	936	733	ERR339876	ST1	na	RT027	initial test set
318	401	803	369	318	898	800	ERR339877	ST1	na	RT027	initial test set
478	575	1177	504	486	1166	1046	ERR339878	ST1	na	RT027	initial test set
488	484	1086	439	473	1141	1059	ERR339879	ST1	na	RT027	initial test set
513	564	945	517	494	1263	995	ERR339880	ST1	na	RT027	initial test set
355	439	850	424	351	904	869	ERR339881	ST1	na	RT027	initial test set
333	398	754	314	355	797	782	ERR339882	ST1	na	RT027	initial test set
159	344	488	260	206	514	330	ERR339883	ST1	na	RT027	initial test set
302	341	732	335	324	762	697	ERR339884	ST1	na	RT027	initial test set
261	353	755	367	377	819	686	ERR339885	ST1	na	RT027	initial test set
437	561	1016	124	427	1084	1035	ERR339886	ST1	na	0	initial test set
206	268	549	267	218	569	528	ERR339887	ST1	na	RT027	initial test set
346	313	712	301	303	711	609	ERR339888	ST1	na	RT027	initial test set
244	222	517	232	196	555	463	ERR339889	ST1	na	RT027	initial test set
265	327	638	314	306	806	609	ERR339890	ST1	na	RT027	initial test set
318	338	599	305	295	748	625	ERR339891	ST1	na	RT027	initial test set
197	229	391	198	205	454	410	ERR339892	ST1	na	RT027	initial test set
377	466	959	431	396	978	926	ERR339893	ST1	na	RT027	initial test set
324	566	1061	546	465	923	959	ERR339894	ST1	na	RT027	initial test set
304	358	736	281	318	813	642	ERR339895	ST1	na	RT027	initial test set
423	494	1053	468	440	1001	931	ERR339896	ST1	na	RT027	initial test set
287	388	708	340	332	837	685	ERR339897	ST1	na	RT027	initial test set
511	513	1066	503	439	1189	1021	ERR339898	ST1	na	RT027	initial test set
271	314	644	301	250	595	609	ERR339899	ST1	na	RT027	initial test set
353	415	713	353	326	850	717	ERR339900	ST1	na	RT027	initial test set
302	346	733	304	269	736	686	ERR339901	ST1	na	RT027	initial test set
235	280	470	211	222	504	437	ERR339902	ST1	na	RT027	initial test set
270	348	623	278	252	708	495	ERR339903	ST1	na	RT027	initial test set
496	636	1115	607	539	1371	1028	ERR339904	ST1	na	RT027	initial test set
380	541	934	450	439	1009	752	ERR339905	ST1	na	RT027	initial test set
322	444	885	406	365	817	773	ERR339906	ST1	na	RT027	initial test set
268	280	638	296	272	701	530	ERR339907	ST1	na	RT027	initial test set
277	390	683	303	348	837	653	ERR339908	ST1	na	RT027	initial test set
370	439	876	393	381	973	829	ERR339909	ST1	na	RT027	initial test set
240	373	568	331	268	683	474	ERR339910	ST1	na	RT027	initial test set
214	296	557	288	204	580	520	ERR339911	ST1	na	RT027	initial test set
408	491	753	423	396	922	822	ERR339912	ST1	na	RT027	initial test set
260	325	648	256	266	648	528	ERR339913	ST1	na	RT027	initial test set
513	740	1318	605	540	1397	1197	ERR339914	ST1	na	RT027	initial test set
541	698	1171	629	576	1297	1207	ERR339915	ST1	na	RT027	initial test set
309	400	1299	557	437	1136	799	ERR339916	ST1	na	RT027	initial test set
314	371	687	316	273	742	601	ERR339917	ST1	na	RT027	initial test set
345	448	771	413	382	969	743	ERR339918	ST1	na	RT027	initial test set
347	314	528	299	267	764	465	ERR339919	ST1	na	RT027	initial test set
228	351	583	323	289	623	548	ERR339920	ST1	na	RT027	initial test set
324	385	721	378	313	796	629	ERR339921	ST1	na	RT027	initial test set
258	363	619	295	262	704	589	ERR339922	ST1	na	RT027	initial test set
297	359	561	254	289	715	577	ERR339923	ST1	na	RT027	initial test set
347	427	686	382	363	932	634	ERR339924	ST1	na	RT027	initial test set
435	435	887	419	356	905	778	ERR339925	ST1	na	RT027	initial test set
357	367	700	323	327	775	699	ERR339926	ST1	na	RT027	initial test set
331	316	646	325	316	901	640	ERR339927	ST1	na	RT027	initial test set
284	388	656	308	275	785	584	ERR339928	ST1	na	RT027	initial test set
279	289	596	278	264	588	541	ERR339929	ST1	na	RT027	initial test set
258	285	695	261	307	703	570	ERR339930	ST1	na	RT027	initial test set
274	288	592	284	296	638	584	ERR339931	ST1	na	RT027	initial test set
325	378	640	318	341	767	632	ERR339932	ST1	na	RT027	initial test set
186	199	432	213	197	523	409	ERR339933	ST1	na	RT027	initial test set
306	403	815	393	322	826	780	ERR339934	ST1	na	RT027	initial test set
333	402	727	337	310	755	672	ERR339935	ST1	na	RT027	initial test set
347	413	778	382	326	888	678	ERR339936	ST1	na	RT027	initial test set
517	741	1295	599	557	1477	1327	ERR339937	ST1	na	RT027	initial test set
430	389	674	359	326	796	654	ERR339938	ST1	na	RT027	initial test set
192	289	696	212	5	557	475	ERR339939	ST1	na	0	initial test set
334	457	780	383	366	970	615	ERR339941	ST1	na	RT027	initial test set
220	312	534	281	238	579	558	ERR339942	ST1	na	RT027	initial test set
265	319	671	278	224	701	495	ERR339943	ST1	na	RT027	initial test set
390	472	849	439	363	1047	792	ERR339944	ST1	na	RT027	initial test set
326	469	753	407	377	840	759	ERR339945	ST1	na	RT027	initial test set
307	377	705	303	333	803	633	ERR339946	ST1	na	RT027	initial test set
305	552	1001	460	442	939	742	ERR339947	ST1	na	RT027	initial test set
341	408	710	348	341	932	695	ERR339948	ST1	na	RT027	initial test set
334	386	713	385	341	776	735	ERR339949	ST1	na	RT027	initial test set
261	348	579	312	308	612	497	ERR339950	ST1	na	RT027	initial test set
223	361	533	289	295	662	549	ERR339951	ST1	na	RT027	initial test set
372	424	884	379	366	896	795	ERR339952	ST1	na	RT027	initial test set
395	466	834	389	413	915	823	ERR339953	ST1	na	RT027	initial test set
274	336	616	349	260	646	686	ERR339954	ST1	na	RT027	initial test set
463	497	877	476	429	1023	931	ERR339955	ST1	na	RT027	initial test set
305	344	715	359	300	763	638	ERR339956	ST1	na	RT027	initial test set
363	324	646	304	318	772	569	ERR339957	ST1	na	RT027	initial test set
495	653	1294	558	585	1390	1106	ERR340071	ST1	na	RT027	initial test set
369	518	996	446	418	934	916	ERR340076	ST1	na	RT027	initial test set
600	733	1677	757	703	1530	1527	ERR340077	ST1	na	RT027	initial test set
395	1130	1672	919	718	1819	1203	ERR340078	ST1	na	RT027	initial test set
412	593	1074	510	501	1071	1077	ERR340113	ST1	na	RT027	initial test set
566	649	1180	622	507	1187	1124	ERR340127	ST1	na	RT027	initial test set
726	823	1542	813	701	1482	1408	ERR340131	ST1	na	RT027	initial test set
275	280	569	277	268	535	495	ERR340147	ST1	na	RT027	initial test set
418	523	1030	507	455	1001	865	ERR340181	ST1	na	RT027	initial test set
401	551	990	449	368	925	1006	ERR340288	ST1	na	RT027	initial test set
416	512	866	407	372	986	837	ERR340290	ST1	na	RT027	initial test set
370	434	754	433	401	782	778	ERR340302	ST1	na	RT027	initial test set
383	460	869	449	415	871	826	ERR340303	ST1	na	RT027	initial test set
470	522	1047	442	472	927	824	ERR340304	ST1	na	RT027	initial test set
447	527	890	467	488	930	817	ERR340305	ST1	na	RT027	initial test set
209	304	432	280	219	503	442	ERR347491	ST1	na	RT027	initial test set
460	525	995	455	481	1013	855	ERR347508	ST1	na	RT027	initial test set
289	392	775	377	324	754	759	ERR347535	ST1	na	RT027	initial test set
300	362	600	311	297	745	566	ERR347577	ST1	na	RT027	initial test set
298	424	710	335	351	778	598	ERR347578	ST1	na	RT027	initial test set
202	276	531	219	242	483	499	ERR347579	ST1	na	RT027	initial test set
318	381	755	429	347	854	691	ERR347580	ST1	na	RT027	initial test set
183	266	509	264	263	568	552	ERR347581	ST1	na	RT027	initial test set
213	254	509	233	228	480	452	ERR347583	ST1	na	RT027	initial test set
281	340	789	391	335	798	732	ERR347584	ST1	na	RT027	initial test set
290	348	686	330	296	817	511	ERR347586	ST1	na	RT027	initial test set
360	440	812	381	378	794	872	ERR347588	ST1	na	RT027	initial test set
423	539	920	497	437	1041	965	ERR347589	ST1	na	RT027	initial test set
455	536	879	507	406	922	875	ERR347590	ST1	na	RT027	initial test set
229	498	795	480	416	670	684	ERR347591	ST1	na	RT027	initial test set
209	227	421	211	196	500	433	ERR347593	ST1	na	RT027	initial test set
198	282	541	273	193	484	441	ERR347594	ST1	na	RT027	initial test set
265	290	568	321	250	541	534	ERR347596	ST1	na	RT027	initial test set
260	312	596	322	271	603	589	ERR347598	ST1	na	RT027	initial test set
698	889	1503	774	727	1478	1322	ERR347599	ST1	na	RT027	initial test set
505	543	949	469	478	1009	878	ERR347601	ST1	na	RT027	initial test set
304	382	593	334	316	674	628	ERR347602	ST1	na	RT027	initial test set
387	578	826	471	448	1009	843	ERR347603	ST1	na	RT027	initial test set
212	294	468	269	219	516	515	ERR347604	ST1	na	RT027	initial test set
471	563	1025	530	494	1047	895	ERR347605	ST1	na	RT027	initial test set
221	267	533	209	241	564	423	ERR347606	ST1	na	RT027	initial test set
299	424	672	337	333	682	686	ERR347610	ST1	na	RT027	initial test set
138	236	455	186	178	447	341	ERR347611	ST1	na	RT027	initial test set
202	289	604	254	266	477	495	ERR347612	ST1	na	RT027	initial test set
216	279	571	281	279	603	533	ERR347616	ST1	na	RT027	initial test set
190	340	486	226	241	506	504	ERR347617	ST1	na	RT027	initial test set
190	262	501	255	218	452	433	ERR347621	ST1	na	RT027	initial test set
270	300	604	292	282	644	499	ERR347622	ST1	na	RT027	initial test set
310	317	686	366	278	669	520	ERR347623	ST1	na	RT027	initial test set
119	207	433	193	184	371	380	ERR347624	ST1	na	RT027	initial test set
303	383	608	337	301	650	631	ERR347625	ST1	na	RT027	initial test set
232	232	521	226	234	559	395	ERR347626	ST1	na	RT027	initial test set
241	311	587	311	253	545	496	ERR347627	ST1	na	RT027	initial test set
159	236	387	225	197	442	354	ERR347628	ST1	na	RT027	initial test set
257	298	565	360	266	660	488	ERR347629	ST1	na	RT027	initial test set
301	424	700	332	353	741	705	ERR347630	ST1	na	RT027	initial test set
206	270	479	224	209	530	362	ERR347631	ST1	na	RT027	initial test set
359	441	710	367	344	727	612	ERR347632	ST1	na	RT027	initial test set
232	336	614	271	299	564	630	ERR347634	ST1	na	RT027	initial test set
160	189	355	179	198	358	352	ERR347635	ST1	na	RT027	initial test set
273	428	631	339	340	662	622	ERR347636	ST1	na	RT027	initial test set
274	394	620	338	313	566	516	ERR347637	ST1	na	RT027	initial test set
246	312	536	313	242	592	487	ERR347638	ST1	na	RT027	initial test set
221	302	539	289	261	469	513	ERR347639	ST1	na	RT027	initial test set
361	382	756	370	343	748	662	ERR347640	ST1	na	RT027	initial test set
176	224	478	268	226	397	465	ERR347641	ST1	na	RT027	initial test set
212	291	505	282	213	457	444	ERR347642	ST1	na	RT027	initial test set
238	366	700	317	364	542	597	ERR347644	ST1	na	RT027	initial test set
204	277	507	309	292	474	497	ERR347645	ST1	na	RT027	initial test set
236	302	599	261	306	539	565	ERR347646	ST1	na	RT027	initial test set
291	401	838	431	325	762	733	ERR347647	ST1	na	RT027	initial test set
335	441	716	356	369	799	696	ERR347648	ST1	na	RT027	initial test set
249	320	676	320	305	686	558	ERR347649	ST1	na	RT027	initial test set
197	229	463	267	214	419	533	ERR347650	ST1	na	RT027	initial test set
220	335	645	349	297	575	579	ERR347651	ST1	na	RT027	initial test set
276	344	612	283	239	556	538	ERR347652	ST1	na	RT027	initial test set
200	230	456	242	216	467	420	ERR347653	ST1	na	RT027	initial test set
146	222	361	227	180	420	331	ERR347654	ST1	na	RT027	initial test set
180	311	445	273	225	493	382	ERR347655	ST1	na	RT027	initial test set
256	305	654	317	300	612	529	ERR347656	ST1	na	RT027	initial test set
275	370	671	364	324	717	589	ERR347657	ST1	na	RT027	initial test set
319	411	759	358	329	752	677	ERR347658	ST1	na	RT027	initial test set
308	517	876	412	415	893	754	ERR347659	ST1	na	RT027	initial test set
238	315	567	261	290	602	438	ERR347660	ST1	na	RT027	initial test set
167	203	372	193	167	411	314	ERR347661	ST1	na	RT027	initial test set
441	572	1067	520	486	1114	862	ERR347662	ST1	na	RT027	initial test set
317	359	711	365	312	686	649	ERR347664	ST1	na	RT027	initial test set
420	546	937	488	475	878	953	ERR347665	ST1	na	RT027	initial test set
237	298	536	266	252	526	475	ERR347666	ST1	na	RT027	initial test set
448	518	1069	454	462	978	954	ERR347667	ST1	na	RT027	initial test set
252	326	522	258	260	500	573	ERR347668	ST1	na	RT027	initial test set
280	307	647	320	268	640	562	ERR347669	ST1	na	RT027	initial test set
323	399	679	355	307	645	659	ERR347670	ST1	na	RT027	initial test set
257	247	487	272	238	534	476	ERR347671	ST1	na	RT027	initial test set
150	232	435	207	212	414	405	ERR347672	ST1	na	RT027	initial test set
346	401	687	427	309	682	653	ERR347673	ST1	na	RT027	initial test set
354	460	780	400	390	803	697	ERR347675	ST1	na	RT027	initial test set
217	245	476	245	233	439	441	ERR347676	ST1	na	RT027	initial test set
501	512	939	410	453	900	740	ERR347677	ST1	na	RT027	initial test set
182	308	519	267	243	416	440	ERR347678	ST1	na	RT027	initial test set
274	309	686	271	309	581	637	ERR347679	ST1	na	RT027	initial test set
283	258	528	308	271	504	446	ERR347680	ST1	na	RT027	initial test set
238	329	589	296	289	585	519	ERR347681	ST1	na	RT027	initial test set
620	736	1411	765	630	1411	1197	ERR347682	ST1	na	RT027	initial test set
133	282	397	144	172	331	293	ERR347683	ST1	na	RT027	initial test set
181	282	511	285	228	541	438	ERR347684	ST1	na	RT027	initial test set
210	250	454	216	234	413	402	ERR347685	ST1	na	RT027	initial test set
262	300	562	263	265	552	485	ERR347686	ST1	na	RT027	initial test set
138	192	302	163	156	266	340	ERR347687	ST1	na	RT027	initial test set
389	499	1101	528	470	1004	948	ERR347688	ST1	na	RT027	initial test set
353	572	903	422	488	1034	748	ERR347689	ST1	na	RT027	initial test set
317	394	865	390	369	724	711	ERR347690	ST1	na	RT027	initial test set
604	574	1085	568	518	1141	989	ERR347691	ST1	na	RT027	initial test set
186	250	430	224	196	422	413	ERR347692	ST1	na	RT027	initial test set
299	409	781	321	321	694	637	ERR347693	ST1	na	RT027	initial test set
293	361	753	352	365	657	681	ERR347694	ST1	na	RT027	initial test set
232	280	484	224	242	428	465	ERR347695	ST1	na	RT027	initial test set
153	187	365	201	176	323	341	ERR347696	ST1	na	RT027	initial test set
252	280	634	279	292	558	579	ERR347697	ST1	na	RT027	initial test set
220	217	361	245	162	340	358	ERR347698	ST1	na	RT027	initial test set
214	273	517	259	256	454	471	ERR347699	ST1	na	RT027	initial test set
153	166	366	153	143	322	284	ERR347700	ST1	na	RT027	initial test set
381	500	932	433	461	890	866	ERR347701	ST1	na	RT027	initial test set
135	185	295	169	146	293	263	ERR347702	ST1	na	RT027	initial test set
163	288	543	209	260	534	447	ERR347703	ST1	na	RT027	initial test set
290	339	644	329	329	601	568	ERR347704	ST1	na	RT027	initial test set
198	294	506	277	256	568	468	ERR347705	ST1	na	RT027	initial test set
223	208	432	181	188	453	339	ERR347706	ST1	na	RT027	initial test set
370	509	815	468	389	830	893	ERR347707	ST1	na	RT027	initial test set
325	562	1011	501	420	785	722	ERR347708	ST1	na	RT027	initial test set
289	395	774	361	369	671	755	ERR347710	ST1	na	RT027	initial test set
324	397	845	349	364	709	724	ERR347711	ST1	na	RT027	initial test set
245	327	580	329	308	598	529	ERR347712	ST1	na	RT027	initial test set
460	536	975	470	446	997	788	ERR347713	ST1	na	RT027	initial test set
225	304	558	254	246	638	484	ERR347714	ST1	na	RT027	initial test set
292	371	690	311	319	685	559	ERR347716	ST1	na	RT027	initial test set
287	428	732	378	371	747	747	ERR347717	ST1	na	RT027	initial test set
548	772	1335	664	682	1245	1316	ERR347718	ST1	na	RT027	initial test set
265	411	880	442	405	746	810	ERR347719	ST1	na	RT027	initial test set
478	571	1176	515	557	1083	963	ERR347722	ST1	na	RT027	initial test set
463	589	913	484	484	865	936	ERR347723	ST1	na	RT027	initial test set
512	585	1094	517	505	1090	976	ERR347724	ST1	na	RT027	initial test set
282	352	696	405	350	700	659	ERR347725	ST1	na	RT027	initial test set
443	564	1064	463	500	954	898	ERR347728	ST1	na	RT027	initial test set
418	574	992	576	502	1101	807	ERR347729	ST1	na	RT027	initial test set
319	425	792	391	388	748	592	ERR347730	ST1	na	RT027	initial test set
354	482	938	401	416	798	824	ERR347731	ST1	na	RT027	initial test set
388	502	1009	487	409	1110	798	ERR347734	ST1	na	RT027	initial test set
292	333	659	292	273	570	568	ERR347735	ST1	na	RT027	initial test set
289	363	761	325	308	721	566	ERR347736	ST1	na	RT027	initial test set
359	410	704	372	360	813	590	ERR347737	ST1	na	RT027	initial test set
330	402	725	339	326	647	634	ERR347738	ST1	na	RT027	initial test set
328	387	665	377	333	707	679	ERR347740	ST1	na	RT027	initial test set
829	949	1526	899	841	1643	1464	ERR347741	ST1	na	RT027	initial test set
275	330	562	337	323	587	590	ERR347742	ST1	na	RT027	initial test set
349	476	847	404	376	763	714	ERR347743	ST1	na	RT027	initial test set
218	306	619	266	281	521	532	ERR347744	ST1	na	RT027	initial test set
199	222	479	221	212	425	458	ERR347747	ST1	na	RT027	initial test set
160	250	432	212	190	413	421	ERR347748	ST1	na	RT027	initial test set
348	477	748	447	406	671	809	ERR347749	ST1	na	RT027	initial test set
178	278	558	290	245	549	601	ERR347750	ST1	na	RT027	initial test set
357	493	952	497	407	950	869	ERR347751	ST1	na	RT027	initial test set
170	244	379	231	190	414	408	ERR347752	ST1	na	RT027	initial test set
231	243	478	216	244	447	525	ERR347753	ST1	na	RT027	initial test set
197	240	540	218	261	541	511	ERR347754	ST1	na	RT027	initial test set
161	216	473	234	209	464	469	ERR347755	ST1	na	RT027	initial test set
193	254	461	265	223	464	605	ERR347756	ST1	na	RT027	initial test set
309	332	585	320	291	575	614	ERR347759	ST1	na	RT027	initial test set
146	253	422	208	203	467	399	ERR347760	ST1	na	RT027	initial test set
491	657	1156	588	516	1036	1043	ERR347761	ST1	na	RT027	initial test set
286	364	722	379	335	776	652	ERR347762	ST1	na	RT027	initial test set
254	302	650	267	280	586	584	ERR347763	ST1	na	RT027	initial test set
311	307	823	261	290	484	419	ERR347764	ST1	na	RT027	initial test set
549	649	1250	653	609	1240	1192	ERR347765	ST1	na	RT027	initial test set
514	648	1207	635	618	1281	1246	ERR347766	ST1	na	RT027	initial test set
246	305	661	331	322	626	607	ERR347767	ST1	na	RT027	initial test set
289	372	538	315	353	558	636	ERR347770	ST1	na	RT027	initial test set
390	527	845	447	408	838	785	ERR347771	ST1	na	RT027	initial test set
180	198	416	170	224	374	448	ERR347772	ST1	na	RT027	initial test set
257	315	701	315	321	649	609	ERR347773	ST1	na	RT027	initial test set
188	299	458	233	229	463	454	ERR347774	ST1	na	RT027	initial test set
407	555	983	416	442	918	917	ERR347775	ST1	na	RT027	initial test set
444	523	992	436	432	882	826	ERR347776	ST1	na	RT027	initial test set
240	341	646	272	288	667	506	ERR347777	ST1	na	RT027	initial test set
226	329	665	385	304	683	670	ERR347778	ST1	na	RT027	initial test set
377	503	926	517	491	956	897	ERR347780	ST1	na	RT027	initial test set
401	542	1016	545	471	923	901	ERR347781	ST1	na	RT027	initial test set
345	372	732	389	346	762	758	ERR347782	ST1	na	RT027	initial test set
219	335	557	294	196	514	633	ERR347783	ST1	na	RT027	initial test set
374	534	934	458	422	933	953	ERR347784	ST1	na	RT027	initial test set
232	312	626	297	344	547	644	ERR347785	ST1	na	RT027	initial test set
967	1210	2176	1157	1044	2296	1769	ERR347786	ST1	na	RT027	initial test set
298	392	800	340	333	694	654	ERR347787	ST1	na	RT027	initial test set
251	298	527	354	223	601	568	ERR347788	ST1	na	RT027	initial test set
416	451	967	463	411	874	902	ERR347789	ST1	na	RT027	initial test set
450	562	989	441	443	908	824	ERR347792	ST1	na	RT027	initial test set
662	911	1433	783	701	1305	1327	ERR347793	ST1	na	RT027	initial test set
291	355	742	333	341	726	633	ERR347794	ST1	na	RT027	initial test set
351	447	863	427	418	923	827	ERR347795	ST1	na	RT027	initial test set
249	376	718	328	356	673	700	ERR347796	ST1	na	RT027	initial test set
374	593	1032	505	465	861	987	ERR347797	ST1	na	RT027	initial test set
428	460	875	462	395	895	761	ERR347798	ST1	na	RT027	initial test set
252	324	579	318	266	596	545	ERR347799	ST1	na	RT027	initial test set
349	413	750	387	362	816	655	ERR347800	ST1	na	RT027	initial test set
303	364	738	415	318	831	685	ERR347801	ST1	na	RT027	initial test set
197	270	524	257	221	489	426	ERR347804	ST1	na	RT027	initial test set
307	355	818	347	307	822	654	ERR347805	ST1	na	RT027	initial test set
207	225	424	295	236	479	476	ERR347806	ST1	na	RT027	initial test set
206	268	572	270	228	559	515	ERR347807	ST1	na	RT027	initial test set
127	184	427	202	178	388	343	ERR347808	ST1	na	RT027	initial test set
258	444	767	399	374	802	646	ERR347809	ST1	na	RT027	initial test set
357	441	794	428	365	850	743	ERR347810	ST1	na	RT027	initial test set
503	738	1267	679	583	1252	1089	ERR347811	ST1	na	RT027	initial test set
373	520	848	438	420	939	780	ERR347812	ST1	na	RT027	initial test set
252	332	655	338	305	630	612	ERR347813	ST1	na	RT027	initial test set
363	612	1095	555	401	1020	1038	ERR347816	ST1	na	RT027	initial test set
297	400	822	364	323	712	712	ERR347817	ST1	na	RT027	initial test set
243	387	607	346	306	590	572	ERR347818	ST1	na	RT027	initial test set
613	841	1467	735	668	1585	1620	ERR347819	ST1	na	RT027	initial test set
203	282	513	253	220	497	442	ERR347820	ST1	na	RT027	initial test set
240	378	557	290	275	542	421	ERR347821	ST1	na	RT027	initial test set
352	464	914	423	410	693	879	ERR347822	ST1	na	RT027	initial test set
317	406	804	432	373	789	654	ERR347823	ST1	na	RT027	initial test set
728	913	1804	900	815	1746	1558	ERR347824	ST1	na	RT027	initial test set
149	189	349	177	181	302	290	ERR347825	ST1	na	RT027	initial test set
213	340	649	331	276	649	612	ERR347828	ST1	na	RT027	initial test set
235	361	609	301	281	558	555	ERR347829	ST1	na	RT027	initial test set
411	505	1057	490	467	1091	1043	ERR347830	ST1	na	RT027	initial test set
121	237	418	187	178	374	333	ERR347831	ST1	na	RT027	initial test set
340	467	956	446	454	952	812	ERR347832	ST1	na	RT027	initial test set
137	161	356	150	159	336	336	ERR347833	ST1	na	RT027	initial test set
395	502	933	444	441	1022	922	ERR347834	ST1	na	RT027	initial test set
310	490	902	478	432	910	834	ERR347835	ST1	na	RT027	initial test set
304	371	599	307	308	681	535	ERR347929	ST1	na	RT027	initial test set
359	414	772	355	323	855	640	ERR347930	ST1	na	RT027	initial test set
179	241	474	237	207	597	417	ERR347931	ST1	na	RT027	initial test set
341	341	636	369	301	801	574	ERR347933	ST1	na	RT027	initial test set
501	526	1017	518	470	1223	868	ERR347934	ST1	na	RT027	initial test set
410	382	864	452	395	1036	816	ERR347935	ST1	na	RT027	initial test set
361	353	682	394	333	770	622	ERR347936	ST1	na	RT027	initial test set
274	256	455	219	216	510	451	ERR347947	ST1	na	RT027	initial test set
324	258	482	287	259	641	540	ERR347950	ST1	na	RT027	initial test set
160	194	360	153	158	444	313	ERR347951	ST1	na	RT027	initial test set
333	316	605	324	272	694	636	ERR347952	ST1	na	RT027	initial test set
259	215	426	182	178	429	429	ERR347953	ST1	na	RT027	initial test set
443	434	906	450	432	1008	805	ERR347954	ST1	na	RT027	initial test set
450	565	1104	539	486	1091	958	ERR347956	ST1	na	RT027	initial test set
366	489	965	481	380	816	832	ERR347957	ST1	na	RT027	initial test set
353	475	907	422	391	784	821	ERR347958	ST1	na	RT027	initial test set
389	427	799	377	446	770	694	ERR347959	ST1	na	RT027	initial test set
266	378	558	327	292	530	515	ERR347960	ST1	na	RT027	initial test set
200	308	566	318	280	497	462	ERR347961	ST1	na	RT027	initial test set
406	536	1166	578	506	981	966	ERR347962	ST1	na	RT027	initial test set
334	401	871	344	338	680	773	ERR347963	ST1	na	RT027	initial test set
423	518	933	521	414	968	840	ERR347964	ST1	na	RT027	initial test set
693	726	634	774	636	1382	1252	ERR347965	ST1	na	RT027	initial test set
275	378	940	535	432	671	783	ERR347966	ST1	na	RT027	initial test set
479	547	1060	542	496	1078	893	ERR347967	ST1	na	RT027	initial test set
509	589	1238	577	488	1142	1124	ERR347968	ST1	na	RT027	initial test set
322	413	831	420	376	719	745	ERR347969	ST1	na	RT027	initial test set
341	434	485	429	376	728	731	ERR347970	ST1	na	RT027	initial test set
320	411	793	376	366	644	532	ERR347971	ST1	na	RT027	initial test set
362	449	418	405	382	841	712	ERR347972	ST1	na	RT027	initial test set
493	574	1067	558	542	1119	1164	ERR347973	ST1	na	RT027	initial test set
391	532	1067	479	485	900	908	ERR347974	ST1	na	RT027	initial test set
364	482	452	425	413	795	851	ERR347975	ST1	na	RT027	initial test set
487	635	649	548	534	1071	1180	ERR347976	ST1	na	RT027	initial test set
303	541	1556	510	478	829	877	ERR347977	ST1	na	RT027	initial test set
347	445	826	412	402	710	658	ERR347978	ST1	na	RT027	initial test set
458	543	1203	528	523	1159	1006	ERR347979	ST1	na	RT027	initial test set
533	600	1204	511	520	1110	1077	ERR347980	ST1	na	RT027	initial test set
428	644	1317	680	637	1242	1228	ERR347981	ST1	na	RT027	initial test set
419	553	948	501	422	893	872	ERR347982	ST1	na	RT027	initial test set
357	575	1045	494	487	1047	1044	ERR347983	ST1	na	RT027	initial test set
240	329	679	341	305	613	525	ERR347984	ST1	na	RT027	initial test set
325	467	990	447	458	784	788	ERR347985	ST1	na	RT027	initial test set
273	520	1038	487	452	940	714	ERR347986	ST1	na	RT027	initial test set
313	494	1553	0	450	927	816	ERR347987	ST1	na	0	initial test set
493	643	1277	579	593	1268	1253	ERR347988	ST1	na	RT027	initial test set
377	526	1223	510	489	1517	94	ERR347989	ST1	na	0	initial test set
498	609	1253	636	604	1182	1328	ERR347990	ST1	na	RT027	initial test set
420	454	844	447	413	878	774	ERR347991	ST1	na	RT027	initial test set
444	539	1216	610	527	1147	1079	ERR348049	ST1	na	RT027	initial test set
347	444	858	487	400	791	774	ERR348050	ST1	na	RT027	initial test set
315	390	714	319	309	689	531	ERR348051	ST1	na	RT027	initial test set
472	686	1127	575	502	1228	1077	ERR348052	ST1	na	RT027	initial test set
320	435	945	510	443	810	813	ERR348053	ST1	na	RT027	initial test set
334	426	827	379	367	768	703	ERR348054	ST1	na	RT027	initial test set
324	412	840	396	404	739	786	ERR348055	ST1	na	RT027	initial test set
356	446	887	377	371	755	848	ERR348056	ST1	na	RT027	initial test set
354	453	964	440	441	950	877	ERR348057	ST1	na	RT027	initial test set
450	571	545	602	511	1225	945	ERR348058	ST1	na	RT027	initial test set
284	537	1164	479	493	734	842	ERR348059	ST1	na	RT027	initial test set
482	538	1079	553	526	1075	925	ERR348060	ST1	na	RT027	initial test set
462	587	1256	542	421	1189	1123	ERR348061	ST1	na	RT027	initial test set
376	398	856	421	410	695	835	ERR348062	ST1	na	RT027	initial test set
303	456	487	462	420	887	880	ERR348063	ST1	na	RT027	initial test set
248	524	1011	497	461	802	744	ERR348064	ST1	na	RT027	initial test set
549	688	541	567	513	1101	1189	ERR348065	ST1	na	RT027	initial test set
389	531	1084	508	427	1029	954	ERR348066	ST1	na	RT027	initial test set
341	451	951	405	425	811	798	ERR348067	ST1	na	RT027	initial test set
415	453	461	500	417	856	869	ERR348068	ST1	na	RT027	initial test set
449	706	579	562	453	1154	1000	ERR348069	ST1	na	RT027	initial test set
428	717	2009	660	603	1138	1052	ERR348070	ST1	na	RT027	initial test set
268	487	761	423	372	795	686	ERR348071	ST1	na	RT027	initial test set
363	539	999	439	442	1000	929	ERR348072	ST1	na	RT027	initial test set
473	623	1286	572	591	1203	1091	ERR348073	ST1	na	RT027	initial test set
522	759	1299	694	604	1360	1190	ERR348074	ST1	na	RT027	initial test set
414	581	1157	554	531	1009	987	ERR348075	ST1	na	RT027	initial test set
496	591	1102	498	529	1079	1084	ERR348076	ST1	na	RT027	initial test set
269	422	785	461	377	737	638	ERR348077	ST1	na	RT027	initial test set
322	407	888	392	397	819	735	ERR348078	ST1	na	RT027	initial test set
445	675	1230	650	564	1220	1137	ERR348079	ST1	na	RT027	initial test set
377	543	978	362	443	845	885	ERR348080	ST1	na	RT027	initial test set
451	554	1102	527	522	1153	1032	ERR348081	ST1	na	RT027	initial test set
346	510	862	411	413	854	726	ERR348084	ST1	na	RT027	initial test set
295	401	850	380	350	699	749	ERR348091	ST1	na	RT027	initial test set
217	356	591	328	291	606	656	ERR348092	ST1	na	RT027	initial test set
260	351	572	253	216	556	549	ERR467549	ST1	na	RT027	initial test set
363	362	606	317	244	795	572	ERR467551	ST1	na	RT027	initial test set
231	265	571	211	183	610	518	ERR467553	ST1	na	RT027	initial test set
251	280	584	238	183	543	537	ERR467554	ST1	na	RT027	initial test set
214	249	474	211	206	466	477	ERR467556	ST1	na	RT027	initial test set
162	288	544	266	203	590	470	ERR467557	ST1	na	RT027	initial test set
203	307	742	360	227	792	408	ERR467558	ST1	na	RT027	initial test set
172	237	389	201	187	479	397	ERR467560	ST1	na	RT027	initial test set
225	263	474	195	180	459	406	ERR467561	ST1	na	RT027	initial test set
144	261	760	373	222	672	413	ERR467562	ST1	na	RT027	initial test set
184	268	476	249	189	559	372	ERR467564	ST1	na	RT027	initial test set
272	312	505	229	192	565	410	ERR467566	ST1	na	RT027	initial test set
227	266	390	174	183	515	434	ERR467576	ST1	na	RT027	initial test set
231	255	509	219	205	592	382	ERR467577	ST1	na	RT027	initial test set
212	300	587	256	197	601	526	ERR467583	ST1	na	RT027	initial test set
180	289	524	231	227	662	488	ERR467584	ST1	na	RT027	initial test set
263	329	490	256	217	511	479	ERR467589	ST1	na	RT027	initial test set
228	272	482	275	225	523	444	ERR467590	ST1	na	RT027	initial test set
287	341	568	347	228	650	573	ERR467593	ST1	na	RT027	initial test set
538	543	629	613	571	1651	894	ERR502962	ST1	na	RT027	initial test set
538	543	629	613	571	1651	894	ERR537821	ST1	na	RT027	initial test set
950	1288	4007	1206	1006	2104	2479	ERR658294	ST1	na	RT027	initial test set
1058	1549	3959	1270	1179	2166	2368	ERR658295	ST1	na	RT027	initial test set
1131	1671	4318	1392	1322	2478	2844	ERR658301	ST1	na	RT027	initial test set
906	1316	3174	1194	1074	1933	2214	ERR658302	ST1	na	RT027	initial test set
1178	1527	4082	1245	1290	2310	2497	ERR658303	ST1	na	RT027	initial test set
868	1181	7759	1064	1055	1815	2092	ERR658304	ST1	na	0	initial test set
903	1217	3394	1074	1077	1850	2253	ERR658305	ST1	na	RT027	initial test set
1016	1172	3161	899	973	1824	1897	ERR658306	ST1	na	RT027	initial test set
1065	1224	3327	1214	1077	1871	2227	ERR658307	ST1	na	RT027	initial test set
881	1059	2061	1041	987	2276	2057	ERR658308	ST1	na	RT027	initial test set
1047	1317	2167	1126	1128	2602	2105	ERR658309	ST1	na	RT027	initial test set
843	1100	1702	908	814	2160	1751	ERR658310	ST1	na	RT027	initial test set
1170	1464	2519	1223	1258	2840	2560	ERR658311	ST1	na	RT027	initial test set
1213	1765	2828	1384	1442	3230	2672	ERR658312	ST1	na	RT027	initial test set
1017	1338	2358	1136	1067	2721	2294	ERR658313	ST1	na	RT027	initial test set
1374	1858	3195	1614	1419	3523	3154	ERR658314	ST1	na	RT027	initial test set
113	129	129	141	120	256	326	ERR928274	ST1	na	RT027	initial test set
122	139	132	107	148	299	298	ERR928275	ST1	na	RT027	initial test set
220	220	208	200	206	569	404	ERR928277	ST1	na	RT027	initial test set
170	173	323	130	139	475	371	ERR928278	ST1	na	RT027	initial test set
198	183	301	141	163	538	320	ERR928279	ST1	na	RT027	initial test set
307	335	282	295	253	645	577	ERR928280	ST1	na	RT027	initial test set
294	470	630	347	297	743	634	ERR928281	ST1	na	RT027	initial test set
141	213	420	173	184	465	451	ERR928282	ST1	na	RT027	initial test set
232	290	478	255	248	527	443	ERR928283	ST1	na	RT027	initial test set
437	402	355	346	327	1074	603	ERR928284	ST1	na	RT027	initial test set
266	337	753	302	300	811	590	ERR928285	ST1	na	RT027	initial test set
244	282	470	254	236	669	534	ERR928287	ST1	na	RT027	initial test set
153	227	492	241	247	455	815	ERR928288	ST1	na	RT027	initial test set
708	278	441	235	256	725	332	ERR928289	ST1	na	RT027	initial test set
252	128	186	114	99	346	171	ERR928290	ST1	na	RT027	initial test set
194	423	344	203	178	528	371	ERR928295	ST1	na	RT027	initial test set
331	309	486	238	249	722	379	ERR928296	ST1	na	RT027	initial test set
396	328	622	279	247	1021	418	ERR928297	ST1	na	RT027	initial test set
145	925	559	279	289	970	403	ERR928298	ST1	na	RT027	initial test set
321	368	510	278	252	842	453	ERR928299	ST1	na	RT027	initial test set
241	283	571	258	247	789	31	ERR928300	ST1	na	0	initial test set
211	293	443	210	210	614	390	ERR928301	ST1	na	RT027	initial test set
297	323	477	261	256	772	481	ERR928302	ST1	na	RT027	initial test set
292	539	816	349	344	1087	591	ERR928303	ST1	na	RT027	initial test set
83	132	79	114	100	136	381	ERR928304	ST1	na	RT027	initial test set
134	155	263	104	116	293	236	ERR928305	ST1	na	RT027	initial test set
95	146	257	126	107	262	291	ERR928306	ST1	na	RT027	initial test set
106	116	280	138	104	169	424	ERR928307	ST1	na	RT027	initial test set
157	156	261	156	124	251	509	ERR928308	ST1	na	RT027	initial test set
98	95	166	85	62	133	305	ERR928309	ST1	na	RT027	initial test set
48	266	122	77	92	279	90	ERR928310	ST1	na	RT027	initial test set
102	137	193	82	106	244	188	ERR928311	ST1	na	RT027	initial test set
123	106	225	96	95	269	181	ERR928312	ST1	na	RT027	initial test set
307	341	323	232	227	744	535	ERR955906	ST1	na	RT027	initial test set
1851	1705	2509	1221	1166	3026	1829	SAMEA3467896	ST1	na	RT027	initial test set
1087	1244	2574	1150	1048	3630	2873	SAMEA3467897	ST1	na	RT027	initial test set
737	906	1354	709	718	1895	1430	SAMEA3467899	ST1	na	RT027	initial test set
267	291	639	280	332	904	705	SAMEA3467900	ST1	na	RT027	initial test set
6369	7459	12738	6217	5711	19916	13280	SAMEA3467901	ST1	na	RT027	initial test set
309	357	771	339	325	1339	675	SAMEA3467902	ST1	na	RT027	initial test set
417	422	678	318	324	1040	672	SAMEA3467903	ST1	na	RT027	initial test set
633	795	1281	616	612	1873	1355	SAMEA3467904	ST1	na	RT027	initial test set
535	570	1074	544	450	1555	988	SAMEA3467906	ST1	na	RT027	initial test set
236	234	443	218	217	522	340	SAMEA3467933	ST1	na	RT027	initial test set
630	349	502	294	314	935	424	SAMEA3467934	ST1	na	RT027	initial test set
842	1153	4112	1924	1370	3494	2719	SAMN03473811	ST1	na	RT027	initial test set
905	1345	2487	1108	1069	2575	2414	SAMN03473812	ST1	na	RT027	initial test set
1215	1636	2931	1494	1415	2976	2614	SAMN03473813	ST1	na	RT027	initial test set
2359	3314	6204	3023	2756	6286	5901	SAMN03473816	ST1	na	RT027	initial test set
918	1324	2476	1120	1096	2365	2251	SAMN03473819	ST1	na	RT027	initial test set
1857	2539	4368	2238	2002	4468	4092	SAMN03473822	ST1	na	RT027	initial test set
864	1190	2288	1053	978	2155	2206	SAMN03473828	ST1	na	RT027	initial test set
1157	1800	3184	1487	1397	3156	3116	SRR2047584	ST1	na	RT027	initial test set
1179	1759	2986	1570	1496	3060	3125	SRR2047585	ST1	na	RT027	initial test set
2284	3275	6450	2997	2746	6530	6019	SRR2047594	ST1	na	RT027	initial test set
2939	2995	4777	2297	2789	6939	4584	SRR2047595	ST1	na	RT027	initial test set
973	1403	2429	1237	1072	2314	2231	SRR2047596	ST1	na	RT027	initial test set
869	1325	2405	1114	1036	2573	2320	SRR2047603	ST1	na	RT027	initial test set
892	1365	2428	1263	1075	2446	2292	SRR2047617	ST1	na	RT027	initial test set
1528	2399	4267	2091	2021	4167	4340	SRR2047823	ST1	na	RT027	initial test set
924	1268	2320	1072	1034	2382	2094	SRR2047842	ST1	na	RT027	initial test set
2536	3458	6384	3140	2752	6714	6081	SRR2047849	ST1	na	RT027	initial test set
125	176	738	321	230	592	246	SRR4300546	ST1	na	RT027	initial test set
502	166	254	151	153	389	205	SRR4300547	ST1	na	RT027	initial test set
379	682	851	422	392	1010	387	SRR4300552	ST1	na	RT027	initial test set
1985	487	845	459	474	1419	582	SRR4300553	ST1	na	RT027	initial test set
136	142	810	374	203	572	231	SRR4300562	ST1	na	0	initial test set
598	756	1026	490	453	1236	497	SRR4300563	ST1	na	RT027	initial test set
133	621	336	217	195	499	197	SRR4300578	ST1	na	RT027	initial test set
784	359	460	198	272	646	281	SRR4300579	ST1	na	RT027	initial test set
321	168	242	145	129	336	143	SRR4300580	ST1	na	RT027	initial test set
250	401	740	368	287	724	675	SRR5169300	ST1	na	RT027	initial test set
1376	1573	4309	1378	1322	781	3537	SRR593294	ST1	na	0	initial test set
362	481	764	360	291	857	647	SRR593312	ST1	na	RT027	initial test set
323	460	729	388	288	779	725	SRR593320	ST1	na	RT027	initial test set
679	886	2551	812	667	1206	1267	SRR5945685	ST1	na	RT027	initial test set
636	818	2513	831	686	1078	1315	SRR5945686	ST1	na	RT027	initial test set
497	581	1736	621	462	860	863	SRR5945687	ST1	na	RT027	initial test set
630	795	2513	876	651	1163	1376	SRR5945688	ST1	na	RT027	initial test set
1089	1313	2063	1009	902	2076	1822	SRR776481	ST1	na	RT027	initial test set
981	0	2756	0	616	78	2456	ERR026846	ST10	na	0	initial test set
600	0	1820	0	264	36	1302	ERR1015449	ST10	na	0	initial test set
547	0	1667	2	308	43	1212	ERR1015451	ST10	na	0	initial test set
509	0	1420	3	233	34	1051	ERR1015508	ST10	na	0	initial test set
353	0	1226	0	212	17	916	ERR1015529	ST10	na	0	initial test set
245	0	765	0	114	23	475	ERR1015540	ST10	na	0	initial test set
506	3	1806	0	270	12	1286	ERR1024444	ST10	na	0	initial test set
449	0	1720	0	246	32	1350	ERR1024445	ST10	na	0	initial test set
820	4	773	2	201	120	767	ERR125980	ST10	na	0	initial test set
2299	17	10103	4	1503	146	4867	ERR1853184	ST10	na	0	initial test set
598	37	920	60	221	318	638	ERR251800	ST10	na	0	initial test set
505	44	1230	99	289	358	919	ERR251802	ST10	na	0	initial test set
112	0	389	3	71	13	316	ERR251874	ST10	na	0	initial test set
113	0	357	0	47	8	324	ERR277267	ST10	na	0	initial test set
286	2	1988	0	209	480	547	ERR339504	ST10	na	0	initial test set
732	0	808	0	204	298	614	ERR339505	ST10	na	0	initial test set
645	4	852	2	217	23	941	ERR339506	ST10	na	0	initial test set
211	0	1293	0	162	123	688	ERR339507	ST10	na	0	initial test set
277	0	714	0	151	12	649	ERR339508	ST10	na	0	initial test set
1079	3	2710	0	543	40	2413	ERR340075	ST10	na	0	initial test set
319	0	658	2	129	16	514	ERR340123	ST10	na	0	initial test set
416	0	1149	3	217	40	862	ERR340142	ST10	na	0	initial test set
368	3	1021	0	207	6	811	ERR340162	ST10	na	0	initial test set
548	0	1384	0	265	16	1118	ERR340175	ST10	na	0	initial test set
545	3	1343	0	266	26	1146	ERR340178	ST10	na	0	initial test set
529	0	1062	3	249	40	955	ERR340194	ST10	na	0	initial test set
622	0	1282	0	305	38	1097	ERR340211	ST10	na	0	initial test set
1006	3	2145	3	491	51	1881	ERR340235	ST10	na	0	initial test set
500	0	1250	0	245	34	1211	ERR340250	ST10	na	0	initial test set
723	3	1719	0	373	61	1443	ERR340259	ST10	na	0	initial test set
536	0	1519	0	301	19	1277	ERR340268	ST10	na	0	initial test set
408	0	854	0	183	6	753	ERR340277	ST10	na	0	initial test set
370	0	898	0	213	26	857	ERR340280	ST10	na	0	initial test set
438	10	1563	0	307	37	1398	ERR340293	ST10	na	0	initial test set
1237	6	3486	5	701	75	2824	ERR347413	ST10	na	0	initial test set
420	6	1389	0	256	15	1143	ERR347421	ST10	na	0	initial test set
1001	24	2285	0	495	41	1974	ERR347423	ST10	na	0	initial test set
546	6	1629	0	347	87	1351	ERR347424	ST10	na	0	initial test set
702	3	1718	0	349	41	1494	ERR347448	ST10	na	0	initial test set
668	0	1532	0	311	30	1309	ERR347455	ST10	na	0	initial test set
749	7	1692	0	333	19	1493	ERR347490	ST10	na	0	initial test set
612	3	1500	0	297	28	1437	ERR347496	ST10	na	0	initial test set
690	7	1915	2	384	72	1499	ERR347499	ST10	na	0	initial test set
981	3	2570	2	480	55	2072	ERR347522	ST10	na	0	initial test set
607	0	1605	0	394	26	1374	ERR347552	ST10	na	0	initial test set
609	3	1499	0	313	43	1170	ERR347556	ST10	na	0	initial test set
502	0	1034	0	232	45	923	ERR347600	ST10	na	0	initial test set
502	9	1259	3	263	0	1152	ERR347732	ST10	na	0	initial test set
368	4	767	2	188	25	802	ERR347739	ST10	na	0	initial test set
508	0	1516	0	360	13	995	ERR347746	ST10	na	0	initial test set
337	3	887	0	181	20	625	ERR347790	ST10	na	0	initial test set
271	3	740	0	181	29	648	ERR347890	ST10	na	0	initial test set
253	0	638	0	113	27	469	ERR347896	ST10	na	0	initial test set
284	3	721	0	163	17	598	ERR347902	ST10	na	0	initial test set
356	0	914	0	208	20	785	ERR347920	ST10	na	0	initial test set
197	0	798	0	189	11	690	ERR347921	ST10	na	0	initial test set
345	0	991	0	222	35	854	ERR347925	ST10	na	0	initial test set
428	10	1312	0	297	15	1128	ERR348016	ST10	na	0	initial test set
421	0	1212	0	239	26	874	ERR348017	ST10	na	0	initial test set
737	0	1767	0	377	42	1429	ERR348109	ST10	na	0	initial test set
522	12	1613	0	321	47	1112	ERR348110	ST10	na	0	initial test set
443	3	1161	0	254	27	856	ERR348118	ST10	na	0	initial test set
2528	11	5272	0	894	219	4551	SAMN01978901	ST10	na	0	initial test set
227	0	518	2	47	7	298	SRR3115487	ST10	na	0	initial test set
3937	13	4482	0	1032	1696	4022	SRR593179	ST10	na	0	initial test set
3911	3	4682	0	1094	1542	4300	SRR593183	ST10	na	0	initial test set
3382	7	3337	2	681	700	2937	SRR593187	ST10	na	0	initial test set
3273	3	4632	0	991	1145	4097	SRR593196	ST10	na	0	initial test set
3432	6	4010	4	896	832	4080	SRR593220	ST10	na	0	initial test set
1411	0	3054	0	505	58	2543	SRR593384	ST10	na	0	initial test set
3099	6	3041	0	667	1535	2587	SRR593394	ST10	na	0	initial test set
3894	0	4216	2	1018	632	4827	SRR776454	ST10	na	0	initial test set
2751	115	2024	337	590	1404	1827	SRR4125186	ST102	na	0	initial test set
352	30	1502	147	431	452	955	ERR1024384	ST103	na	0	initial test set
745	67	2075	140	817	1004	1318	ERR232388	ST103	na	0	initial test set
442	27	1321	151	434	585	825	ERR340135	ST103	na	0	initial test set
316	21	1375	89	367	314	848	ERR348045	ST103	na	0	initial test set
241	24	1273	37	394	166	694	ERR348138	ST103	na	0	initial test set
934	19	368	33	247	779	51	SRR4300568	ST103	na	0	initial test set
0	7	1161	326	818	967	839	ERR232389	ST107	na	0	initial test set
4	3	518	136	347	310	393	ERR340246	ST107	na	0	initial test set
6	5	879	244	592	498	770	ERR340252	ST107	na	0	initial test set
0	7	1129	188	840	1028	730	ERR347473	ST107	na	0	initial test set
239	4	773	7	263	735	188	ERR605021	ST107	na	0	initial test set
7	0	484	29	327	874	55	SAMEA3294090	ST107	na	0	initial test set
11	5	454	36	413	901	241	SAMEA3297403	ST107	na	0	initial test set
121	0	907	0	350	323	416	ERR1015515	ST109	na	0	initial test set
95	0	633	0	230	123	492	ERR1015522	ST109	na	0	initial test set
653	0	1036	0	542	1274	197	ERR125973	ST109	na	0	initial test set
249	2	1035	4	205	669	416	SRR1185961	ST109	na	0	initial test set
0	0	710	616	717	2170	58	ERR025022	ST11	na	0	initial test set
0	0	749	1029	1252	3117	89	ERR027336	ST11	na	0	initial test set
0	0	766	726	1310	2606	92	ERR027337	ST11	na	0	initial test set
0	0	5	23	28	36	0	ERR027339	ST11	na	0	initial test set
0	0	687	857	1118	2508	73	ERR027340	ST11	na	0	initial test set
0	0	1596	2305	2712	6602	144	ERR027341	ST11	na	0	initial test set
0	0	392	453	749	1573	66	ERR027342	ST11	na	0	initial test set
0	0	861	1114	1429	3194	99	ERR027343	ST11	na	0	initial test set
0	0	376	412	682	1511	43	ERR027345	ST11	na	0	initial test set
0	0	818	860	1407	2897	113	ERR027346	ST11	na	0	initial test set
0	0	461	480	713	1625	41	ERR027347	ST11	na	0	initial test set
280	3	535	184	2008	5061	47	ERR027349	ST11	na	0	initial test set
0	0	571	590	1108	2364	103	ERR027350	ST11	na	0	initial test set
0	0	284	467	541	1397	25	ERR027351	ST11	na	0	initial test set
0	0	181	218	291	740	21	ERR027352	ST11	na	0	initial test set
[truncated: 3,297 more rows]
