# Supplementary material for: A global to local genomics analysis of Clostridioides difficile ST1/RT027 identifies cryptic transmission events in a northern Arizona healthcare network
Source: Microb Genom. 2019 May 20;5(7):e000271. doi: 10.1099/mgen.0.000271 (PMC6700662; doi:10.1099/mgen.0.000271)
Supplement: Supplementary File 18 [file mgen-5-271-s0018.xlsx]

## Sheet: Sheet1
Table S18. Comparison of in silico and PCR ribotyping
	in silico ST1	Lane 3 - ST1 isolate	Lane 11 - ST1 isolate
Band sizes / peaks	234	215	215
	267	250	251
	329	308	307
	331	352	353
	370	399	397
	449	420	412
	551	533
		868
			1004
